# Supplementary material for: Identification of Spring Wheat with Superior Agronomic Performance under Contrasting Nitrogen Managements Using Linear Phenotypic Selection Indices
Source: Plants (Basel). 2022 Jul 20;11(14):1887. doi: 10.3390/plants11141887 (PMC9317689; doi:10.3390/plants11141887)
Supplement: Supplementary file 1 [file plants-11-01887-s001.zip]

Archive with 8 entries (8 files):
- Supplementary Figures.pptx
- Table S1 29042022.xlsx
- Table S2 29042022.txt
- Table S3 29042022.xlsx
- Table S4 29042022.xlsx
- Table S5 29042022.pdf
- Table S6 29042022.xlsx
- Table S7 29042022.xlsx
