# Supplementary material for: Identification of Spring Wheat with Superior Agronomic Performance under Contrasting Nitrogen Managements Using Linear Phenotypic Selection Indices
Source: Plants (Basel). 2022 Jul 20;11(14):1887. doi: 10.3390/plants11141887 (PMC9317689; doi:10.3390/plants11141887)
Supplement: Supplementary file 1 [file plants-11-01887-s001.zip › Table S1 29042022.xlsx]

## Sheet: Sheet1
Table S1 Summary of the spring wheat germplasm used in the present study, including the best linear unbiased estimators (BLUEs) for maturity (d), plant height (cm), grain yield (t ha-1), and grain protein content (%) computed from 5 conventionally (Con) and 4 organically (Org) managed environments.
Genotype code (GID)	Genotype name (cultivar or line)	Type of germplasm	Western Canada wheat class (as of Sept 28, 2021)*	Year of registration or development	Date of registration	Type of registration	Canadian representaive (Breeding program)	Maturity (Con)	Maturity (Org)	Plant height (Con)	Plant height (Org)	Grain yield (Con)	Grain yield (Org)	Grain protein content (Con)	Grain protein content (Org)	Check	Selected as trait donor
GID-001	5604HR CL	Cultivar	CWRS	2011	2011-02-21	Regional Registration	Syngenta Canada Inc.	85.96	83.82	81.81	88.58	4.23	4.63	15.68	15.29
GID-002	5605HR CL	Cultivar	CNHR	2013	2013-06-17	Regional Registration	Syngenta Canada Inc.	89.61	88.36	84.79	89.58	4.86	5.17	16.7	15.93		Yes (N=22)
GID-003	5700PR	Cultivar	CPSR	2001	2001-01-12	Regional Registration	Nutrien AG Solutions Inc.	93.31	90.32	76.45	81.19	5.16	5.64	13.79	13.14
GID-004	5701PR	Cultivar	CPSR	2002	2002-01-11	Regional Registration	Nutrien AG Solutions Inc.	92.62	89.48	77.38	78.83	4.95	5.24	15.81	15
GID-005	5702PR	Cultivar	CPSR	2008	2008-01-09	Regional Registration	Syngenta Canada Inc.	92.94	89.76	83.2	84.05	5.35	5.92	13.87	13.34
GID-006	AAC Bailey	Cultivar	CWRS	2012	2012-06-07	Regional Registration	Agriculture and AgriFood Canada	85.97	84.34	86.79	94.15	4.51	5.25	15.02	14.28
GID-007	AAC Brandon	Cultivar	CWRS	2013	2013-04-23	Regional Registration	Agriculture and AgriFood Canada	91.03	88.69	78.13	79.6	5.24	5.38	15.72	15.49		Yes (N=22)
GID-008	AAC Chiffon	Cultivar	CWSWS	2013	2013-04-12	Regional Registration	Agriculture and AgriFood Canada	90	86.91	83.72	91.36	4.56	5.13	15.29	14.81
GID-009	AAC Connery	Cultivar	CWRS	2015	2015-05-20	Regional Registration	Agriculture and AgriFood Canada	88.02	87.26	77.62	78.46	4.53	4.54	16.18	15.44
GID-010	AAC Crossfield	Cultivar	CPSR	2016	2016-01-08	Regional Registration	Agriculture and AgriFood Canada	91.02	87.63	77.14	84.13	4.5	5.07	15.94	14.62
GID-011	AAC Elie	Cultivar	CWRS	2013	2013-04-23	Regional Registration	Agriculture and AgriFood Canada	90.92	88.8	78.88	78.44	4.93	5.35	15.59	14.96
GID-012	AAC Entice	Cultivar	CPSR	2016	2016-01-08	Regional Registration	Agriculture and AgriFood Canada	91.25	86.58	76.51	77.5	4.8	5.32	15.07	13.8
GID-013	AAC Foray	Cultivar	CPSR	2014	2014-12-18	Regional Registration	Agriculture and AgriFood Canada	91.24	88.5	78.87	83.02	4.88	5.72	15.45	14.11
GID-014	AAC Iceberg	Cultivar	CWHWS	2013	2013-01-15	Regional Registration	Agriculture and AgriFood Canada	88.45	87.21	80.67	83.06	4.86	4.62	15.29	14.46
GID-015	AAC Innova	Cultivar	CWSP	2013	2013-04-12	Regional Registration	Agriculture and AgriFood Canada	88.09	87.24	79.08	81.52	5.2	5.5	13.77	13.47
GID-016	AAC Penhold	Cultivar	CPSR	2014	2014-07-11	Regional Registration	Agriculture and AgriFood Canada	91.39	88.48	72.43	73.71	5.2	5.23	15.33	15.15		Yes (N=22)
GID-017	AAC Proclaim	Cultivar	CWSP	2013	2013-01-10	Regional Registration	Agriculture and AgriFood Canada	91.98	90.2	86.28	91.5	4.79	5.5	13.49	12.44
GID-018	AAC Redwater	Cultivar	CNHR	2012	2012-08-13	Regional Registration	Agriculture and AgriFood Canada	85.67	83.82	79.14	82.51	4.61	5.01	15.44	14.87
GID-019	AAC Ryley	Cultivar	CPSR	2013	2013-04-23	Regional Registration	Agriculture and AgriFood Canada	92.61	91.77	74.93	78.08	5.34	5.56	14.06	13.53
GID-020	AAC Tenacious	Cultivar	CPSR	2014	2014-12-18	Regional Registration	Agriculture and AgriFood Canada	91.85	88.42	91.47	101.52	3.74	3.71	14.23	14.13
GID-021	AAC Viewfield	Cultivar	CWRS	2016	2016-02-12	Regional Registration	Agriculture and AgriFood Canada	90.06	88.16	74.07	73.59	5.05	5.57	15.44	14.79	Yes	Yes (N=22)
GID-022	AAC Whitefox	Cultivar	CWHWS	2013	2013-06-18	Regional Registration	Agriculture and AgriFood Canada	85.19	82.41	88.91	96.7	4.58	4.41	14.85	14.56
GID-023	AC Abbey	Cultivar	CNHR	1998	1998-07-22	Regional Registration	Agriculture and AgriFood Canada	87.57	86.2	79.51	84.74	4.06	4.62	15.06	14.07
GID-024	AC Andrew	Cultivar	CWSWS	2004	2004-05-05	Regional Registration	Agriculture and AgriFood Canada	93.31	91.59	77.34	79.92	6.01	5.94	11.77	11.49
GID-025	AC Barrie	Cultivar	CWRS	1994	1994-08-16	National Registration	Secan Association	88.8	84.62	85	88.93	4.33	4.43	16.63	16.32
GID-026	AC Cadillac	Cultivar	CWRS	1996	1996-07-17	National Registration	Farm Pure Seeds (ex SW Seed Canada Ltd)	86.84	85.23	89.35	100.07	4.48	4.97	16.86	16.52		Yes (N=22)
GID-027	AC Cora	Cultivar	CNHR	1994	1994-12-15	National Registration	Secan Association	83.98	81.88	83.09	92.2	3.97	4.15	16.5	15.65
GID-028	AC Corinne	Cultivar	CWES	1999	1999-11-22	Regional Registration	Agriculture and AgriFood Canada	90.57	88.97	93.8	97.95	4.42	4.82	15.77	14.92
GID-029	AC Crystal	Cultivar	CNHR	1996	1996-07-22	National Registration	Secan Association	95.1	93.23	79.16	81.54	4.68	5.39	14.15	12.91
GID-030	AC Domain	Cultivar	CNHR	1993	1993-12-22	National Registration	Secan Association	85.24	83.39	83.43	86.45	4.47	4.6	15.56	15.39
GID-031	AC Eatonia	Cultivar	CNHR	1993	1993-07-09	National Registration	Nutrien AG Solutions Inc.	87.77	86.82	89.88	96.94	3.92	4.39	16.9	16.34
GID-032	AC Elsa	Cultivar	CWRS	1996	1996-10-07	Regional Registration	Secan Association	88.32	87.05	82.14	88.17	4.33	4.96	16.37	15.32
GID-033	AC Foremost	Cultivar	CNHR	1995	1995-06-02	Regional Registration	Secan Association	94.13	91.78	71.67	73.35	5.07	5.51	13.96	13.1
GID-034	AC Intrepid	Cultivar	CWRS	1997	1997-08-29	Regional Registration	Agriculture and AgriFood Canada	84.99	82.9	86.14	87.6	4.64	4.8	15.42	14.96
GID-035	AC Karma	Cultivar	CPSW	1994	1994-10-11	National Registration	Secan Association	94.54	91.03	79.25	84.3	5.26	5.27	14.28	13.15
GID-036	AC Majestic	Cultivar	CNHR	1996	1996-01-26	National Registration	Secan Association	88.78	87.16	83.01	90.58	4.31	4.86	16.01	15.52
GID-037	AC Meena	Cultivar	CWSWS	2001	2001-04-20	Regional Registration	Agriculture and AgriFood Canada	85.35	83.53	88.62	90.14	4.12	4.61	15.31	14.56
GID-038	AC Michael	Cultivar	CNHR	1994	1994-01-12	National Registration	Secan Association	86.11	84.75	89.09	97.2	3.95	4.73	15.83	15.33
GID-039	AC Minto	Cultivar	CNHR	1991	1991-01-29	National Registration	Secan Association	95.37	92.95	80.45	83.77	4.45	4.85	15.04	13.45
GID-040	AC Nanda	Cultivar	CWSWS	1998	1998-02-25	Regional Registration	Agriculture and AgriFood Canada	90.12	90.88	81.88	86.84	5.01	5.48	13.93	13.5
GID-041	AC Phil	Cultivar	CWSWS	1996	1996-03-15	Regional Registration	Agriculture and AgriFood Canada	88.31	88.15	72.44	75.09	5.06	5.88	11.56	11.14
GID-042	AC Reed	Cultivar	CWSWS	1991	1991-12-20	Regional Registration	Secan Association	89.47	89.03	72.25	76.77	4.89	5.51	11.92	11.37
GID-043	AC Splendor	Cultivar	CWRS	1997	1997-03-24	Regional Registration	Secan Association	83.93	82.63	85.94	92.81	3.91	4.47	16.03	15.75
GID-044	AC Taber	Cultivar	CNHR	1991	1991-05-10	National Registration	Secan Association	95.29	92.93	76.35	80.75	4.57	5.32	13.89	12.91
GID-045	AC Vista	Cultivar	CPSW	1999	1999-08-23	Regional Registration	Agriculture and AgriFood Canada	88.84	86.8	77.98	82.13	5.13	5.43	13.66	13.34
GID-046	AC2000	Cultivar	CPSW	2000	2000-06-27	Cancelled	Agriculture and AgriFood Canada	95.78	92.99	77.92	81.15	4.73	5.23	14.11	12.98
GID-047	Alikat	Cultivar	CNHR	1999	1999-07-30	Regional Registration	University of Alberta	85.53	83.27	86.34	93.12	3.92	4.51	15.76	15.88
GID-048	Alvena	Cultivar	CNHR	2006	2006-11-10	Regional Registration	Agriculture and AgriFood Canada	85.37	83.53	84.94	88.34	4.42	4.92	15.71	15.48
GID-049	Amazon	Cultivar	CWES	1999	1999-10-22	Regional Registration	University of Manitoba	89.46	88.18	94.15	104.36	4.48	4.64	15.75	14.85
GID-050	Benito	Cultivar	CWRS	1979	1979-12-19	Cancelled	Secan Association	85.47	84.75	84.43	94.52	3.93	4.77	15.95	15.4
GID-051	Bhishaj	Cultivar	CWSWS	2003	2003-07-24	Regional Registration	Tony Crooymans & Sons	90.13	88.83	77.67	84.16	5.28	6.15	12.2	11.71
GID-052	Biggar	Cultivar	CPSR	1989	1989-04-11	Cancelled	Secan Association	95.04	92.28	74.76	77.84	4.84	5	13.74	12.62
GID-053	Bluesky	Cultivar	CWES	1987	1987-02-26	National Registration	Secan Association	86.1	83.73	81.74	84.7	4.42	4.54	16.22	15.2
GID-054	Burnside	Cultivar	CWES	2004	2004-09-23	Regional Registration	Agriculture and AgriFood Canada	90.4	87.92	94.84	98.7	4.87	4.87	16.6	15.31
GID-055	BW1039	Line	CWRS		Not registered		University of Alberta	89.45	87.06	84.28	91.18	4.84	5.21	15.99	15.39
GID-056	BW278	Line	CWRS		Not registered			91.44	87.28	89.58	92.74	4.12	4.3	16.49	15.28
GID-057	BW493	Line	CWRS		Not registered			89.64	86.96	94.51	97.36	3.27	4.35	15.52	14.42
GID-058	SY Slate	Cultivar	CWRS	2016	2016-06-10	Regional Registration	Syngenta Canada Inc.	88.34	86.94	83.69	88.73	4.33	4.52	15.59	14.99
GID-059	SY Chert	Cultivar	CWRS	2017	2017-12-15	Regional Registration	Syngenta Canada Inc.	89.23	87.59	78.07	83.05	4.39	4.82	15.95	15.1
GID-060	AAC Concord	Cultivar	CNHR	2016	2016-02-19	Regional Registration	Agriculture and AgriFood Canada	91.06	89.53	87.64	88.64	4.69	5.21	15.36	14.57
GID-061	AAC Redberry	Cultivar	CWRS	2016	2016-02-19	National Registration	Agriculture and AgriFood Canada	86.64	81.96	81.14	85.11	4.97	5.02	16.1	14.89
GID-062	AAC Goodwin	Cultivar	CPSR	2017	2017-08-25	Regional Registration	Agriculture and AgriFood Canada	90.48	89	78.59	82.51	5.64	6	15.15	14.63		Yes (N=22)
GID-063	BW970 Pro	Line	CWRS		Not registered		University of Saskatchewan	89.57	88.32	74.53	77.42	4.94	4.9	15.56	15.05
GID-064	CDC Landmark	Cultivar	CWRS	2016	2016-04-08	Regional Registration	University of Saskatchewan	87.66	85.62	81.42	85.49	4.94	5.01	16.33	15.6
GID-065	Zealand	Cultivar	CWRS	2016	2016-11-10	Regional Registration	University of Alberta	86.61	84.69	90.12	95.53	5.17	5.5	15.53	15.62		Yes (N=22)
GID-066	BYT14-11	Line	CWRS		Not registered		University of Alberta	92	89.43	82.92	84.84	4.31	4.66	15.95	15
GID-067	BW5020	Line	CWRS		Not registered		University of Alberta	94.04	91.07	71.95	73.68	5.28	5.36	14.63	14.13
GID-068	BYT14-19	Line	CWRS		Not registered		University of Alberta	88.14	84.85	85.38	89.89	4.26	4.47	17.24	16.62		Yes (N=22)
GID-069	Canthatch	Cultivar	CWRS	1959	1959-11-23	Cancelled	Agriculture and AgriFood Canada	88.14	85.18	89.59	91.13	4.44	4.71	14.98	14.15
GID-070	Canuck	Cultivar	CWRS	1974	1974-04-03	Cancelled	Agriculture and AgriFood Canada	89.67	87.58	96.71	107.04	3.71	3.91	15.33	14.8
GID-071	Carberry	Cultivar	CWRS	2009	2009-09-18	National Registration	Agriculture and AgriFood Canada	89.36	88.02	77.08	80.3	4.49	4.46	15.84	14.75	Yes
GID-072	Cardale	Cultivar	CWRS	2011	2011-08-02	Regional Registration	Seed Depot Corp.	85.77	84.99	80.87	84.33	4.2	4.91	15.34	14.81
GID-073	CDC Abound	Cultivar	CWRS	2007	2007-05-10	Regional Registration	University of Saskatchewan	87.79	85.23	88.94	95.47	4.73	5.06	15.76	15.27
GID-074	CDC Alsask	Cultivar	CWRS	2005	2005-07-18	Regional Registration	University of Saskatchewan	87.69	85.34	88.05	96.91	4.57	5.21	16.43	15.94		Yes (N=22)
GID-076	CDC Bounty	Cultivar	CWRS	2000	2000-03-16	Regional Registration	University of Saskatchewan	86.14	85.92	89.99	99.71	4.3	5.04	16.49	16.07		Yes (N=22)
GID-077	CDC Bradwell	Cultivar	CWRS	2015	2015-05-01	Regional Registration	University of Saskatchewan	90.57	88.61	78.44	83.31	4.34	4.56	15.71	15.09
GID-078	CDC Go	Cultivar	CWRS	2004	2004-05-05	Regional Registration	University of Saskatchewan	87.48	85.37	79.36	78.28	4.52	4.96	15.14	14.25
GID-079	CDC Imagine	Cultivar	CWRS	2002	2002-12-18	Regional Registration	University of Saskatchewan	88.41	86.4	84.21	89.16	4.67	5.33	16.29	15.92		Yes (N=22)
GID-080	CDC Kernen	Cultivar	CWRS	2010	2010-04-21	Regional Registration	University of Saskatchewan	89.87	87.5	89.43	90.53	4.57	5.32	15.91	15.31
GID-081	CDC Merlin	Cultivar	CWRS	1992	1992-04-21	Cancelled	University of Saskatchewan	88.52	87.58	93.38	100.04	4.43	4.5	15.9	15.22
GID-082	CDC NRG003	Cultivar	CWSP	2010	2010-04-21	Regional Registration	University of Saskatchewan	89.49	87.07	79.71	81.21	5.23	5.36	13.94	13.52
GID-083	CDC Osler	Cultivar	CNHR	2004	2004-05-05	Regional Registration	University of Saskatchewan	85.73	84.88	84.67	90.45	4.62	4.99	15.99	15.24
GID-084	CDC Plentiful	Cultivar	CWRS	2012	2012-01-04	Regional Registration	University of Saskatchewan	86.67	83.73	78.8	85.93	4.64	5.06	15.73	15.31
GID-085	CDC Primepurple	Cultivar	CWSP	2013	2013-11-13	Regional Registration	University of Saskatchewan	94.56	91.16	73.95	77	4.91	5.28	12.67	12.29
GID-086	CDC Rama	Cultivar	CWES	2002	2002-02-15	Regional Registration	University of Saskatchewan	90.45	87.3	88.55	94.65	4.69	5.1	15.28	14.74
GID-087	CDC Stanley	Cultivar	CWRS	2010	2010-04-21	Regional Registration	University of Saskatchewan	89.43	86.9	85.25	87.58	5.15	5.22	15.3	14.34
GID-088	CDC Teal	Cultivar	CWRS	1991	1991-05-10	National Registration	University of Saskatchewan	86.85	85.4	88.93	94.5	4.59	4.9	16.17	15.8
GID-089	CDC Thrive	Cultivar	CWRS	2010	2010-04-21	Regional Registration	University of Saskatchewan	88.36	86.47	89.44	93.47	4.82	5.24	15.95	15.79		Yes (N=22)
GID-090	CDC Titanium	Cultivar	CWRS	2014	2014-01-13	Regional Registration	Nutrien AG Solutions Inc.	87	84.57	84.18	90.69	4.6	5.09	16.21	15.48
GID-091	CDC Utmost	Cultivar	CWRS	2010	2010-04-21	Regional Registration	University of Saskatchewan	89.16	88.6	82.56	88.81	4.41	5.09	15.93	14.64
GID-092	CDC VR Morris	Cultivar	CWRS	2012	2012-01-04	Regional Registration	University of Saskatchewan	89.62	87.78	78.83	86.05	4.4	4.57	17.37	16.98		Yes (N=22)
GID-093	CDC Walrus	Cultivar	CWES	2004	2004-05-05	Regional Registration	University of Saskatchewan	88.67	87.45	88.66	92.9	4.47	4.96	15.99	15.85
GID-094	CDC Whitewood	Cultivar	CWHWS	2013	2013-11-13	Regional Registration	University of Saskatchewan	86.46	85.52	75.35	82.5	4.46	4.64	15.29	14.1
GID-096	CDN Bison	Cultivar	CWES	2009	2009-09-23	Regional Registration	Agriculture and AgriFood Canada	94.03	90.89	85.01	84.55	5.25	5.4	15.44	14.23
GID-097	Coleman	Cultivar	CWRS	2014	2014-02-05	Regional Registration	University of Alberta	83.42	81.36	87.59	89.11	4.31	4.48	15.95	14.87
GID-098	Columbus	Cultivar	CNHR	1980	1980-03-27	National Registration	Secan Association	89.68	89.04	96.14	100.44	4.23	4.59	15.58	15.13
GID-099	Conquer	Cultivar	CNHR	2010	2010-06-28	Regional Registration	Agriculture and AgriFood Canada	91.71	89.92	84.45	91.43	5.16	6.17	16.36	14.7		Yes (N=22)
GID-100	Conway	Cultivar	CNHR	1986	1986-04-28	National Registration	University of Saskatchewan	86.73	85.22	90.41	96.09	4.1	4.4	15.5	14.97
GID-101	Cutler	Cultivar	CPSR	1991	1991-01-24	National Registration	University of Alberta	86.51	84.55	73.21	74.04	4.66	4.93	14.38	13.93
GID-102	Cypress	Cultivar	CWRS	1962	1962-05-24	Cancelled	Agriculture and AgriFood Canada	84.78	83.76	87.69	96.31	2.83	3.69	15.92	15.36
GID-103	Enchant	Cultivar	CPSR	2012	2012-01-26	Regional Registration	Agriculture and AgriFood Canada	90.42	88.53	83.02	88.27	4.83	5.33	15.68	14.75
GID-104	Faller	Cultivar	CNHR	2018	2018-04-06	Regional Registration	Seed Depot Corp.	90.58	88.63	80.8	82.56	5.49	6.02	14.23	13.47
GID-105	Fielder	Cultivar	CWSWS	1976	1976-03-25	Cancelled	USDA, Aberdeen, Idaho	94.42	91.78	76.88	80.8	5.45	5.68	13.13	12.01
GID-106	Fieldstar	Cultivar	CWRS	2008	2008-11-14	Regional Registration	Agriculture and AgriFood Canada	85.03	85.06	87.31	90.48	4.42	4.94	15.02	14.84
GID-107	FL62R1	Line			Exotic			95.69	92.45	90.9	92.89	4.37	5.01	16.13	14.88
GID-108	Garnet	Cultivar	CWRS	1923	1923-01-01	Cancelled	Agriculture and AgriFood Canada	83.99	81.27	87.62	98.19	3.75	4.45	14.97	14.63
GID-109	Glencross	Cultivar	CWES	2008	2008-06-03	Regional Registration	Agriculture and AgriFood Canada	85.94	84.38	91.73	95.12	4.72	4.75	16.39	14.95
GID-110	Glenlea	Cultivar	CWES	1972	1972-03-14	National Registration	University of Manitoba	90.76	88.07	94.93	98.13	4.82	5.19	15.43	14.56
GID-111	Glenn	Cultivar	CWRS	2009	2009-03-24	Regional Registration	Canterra Seeds	88.59	86.41	84.22	86.67	4.55	4.91	16.17	15.57	Yes
GID-112	Go Early	Cultivar	CWRS	2015	2015-03-13	Regional Registration	University of Alberta	84.46	83.34	86.93	94.36	4.51	4.8	15.88	15.05
GID-113	Goodeve	Cultivar	CWRS	2007	2007-10-22	Regional Registration	Agriculture and AgriFood Canada	85.89	85.01	80.48	88.85	4.54	5.11	15.95	15.9		Yes (N=22)
GID-114	GP112	Line	CWSP		Not registered		Syngenta Canada Inc.	91.97	89.87	78.54	86.7	5.05	5.29	14.34	13.63
GID-115	CDC Throttle	Cultivar	CWSP	2016	2016-06-24	Regional Registration	University of Saskatchewan	92.99	91.82	82.06	83.07	5.85	6.41	13.97	13.08
GID-116	AAC Awesome	Cultivar	CWSP	2016	2016-07-08	Regional Registration	Agriculture and AgriFood Canada	94.58	91.62	83.76	79.85	6.12	6.5	12.38	11.72
GID-117	GP168	Line	CWSP		Not registered		University of Alberta	94.36	91.03	78.05	81.05	5.39	6.14	11.79	11.31
GID-118	Grandin	Cultivar	CWRS	1998	1998-02-28	Cancelled	Secan Association	89.64	89.27	77.03	82.38	4.86	5.2	15.1	14.18
GID-119	Harvest	Cultivar	CNHR	2002	2002-06-21	Regional Registration	Farm Pure Seeds (ex SW Seed Canada Ltd)	84.95	84.06	79.66	83.61	4.85	4.99	14.77	14.07
GID-120	Helios	Cultivar	CWRS	2006	2006-03-27	National Registration	Agriculture and AgriFood Canada	85.21	84.68	84.49	92.45	4.41	5.39	15.2	14.55
GID-121	CDC Cordon CLPlus	Cultivar	CNHR	2018	2018-11-09		University of Saskatchewan	88.85	86.38	77.58	78.97	5.21	5.74	14.6	14.13
GID-122	SY Rowyn	Cultivar	CPSR	2016	2016-07-08	Regional Registration	Syngenta Canada Inc.	92.37	86.69	72.54	73.5	5.22	4.99	15.16	14.4
GID-123	Prosper	Cultivar	CNHR	2018	2018-04-06	Regional Registration	Seed Depot Corp.	90.19	88.26	84.9	92.39	3.89	4.65	15.88	14.59
GID-124	AAC Castle	Cultivar	CPSR	2018	2018-08-17		Agriculture and AgriFood Canada	93.38	90.27	74.63	77.72	4.97	5.53	16.63	14.78		Yes (N=22)
GID-125	HY320	Cultivar	CPSR	1985	1985-01-23	Cancelled	Agriculture and AgriFood Canada	94.76	91.92	73.52	79.28	5.09	5.07	13.29	12.35
GID-126	Genesis	Cultivar	CPSW	1990	1990-03-26	Cancelled	Secan Association	95.41	90.44	88.92	91.01	4.38	4.84	13.64	12.47
GID-127	CDC Terrain	Cultivar	CPSR	2016	2016-07-08		University of Saskatchewan	89.91	89.28	79.28	81.6	4.8	5.43	14.22	14.13
GID-128	Infinity	Cultivar	CWRS	2004	2004-09-23	Regional Registration	Canterra Seeds	88.76	87.08	83.12	89.06	4.13	4.82	15.88	15.34
GID-129	Invader	Cultivar	CWRS	1993	1993-05-25	Cancelled	Agricore United	92.11	91.05	87.46	96.4	4.51	5.3	16.18	15.14
GID-130	Journey	Cultivar	CWRS	2002	2002-04-09	Regional Registration	Nutrien AG Solutions Inc.	87.48	84.91	84.98	86.03	4.18	4.33	16.48	15.89
GID-131	Kanata	Cultivar	CWHWS	2006	2006-08-30	Regional Registration	Agriculture and AgriFood Canada	85.21	83.29	84.69	89.44	3.74	4.16	15.95	15.1
GID-132	Kane	Cultivar	CNHR	2006	2006-07-25	National Registration	Agriculture and AgriFood Canada	86.82	84.32	82.35	85.17	4.45	4.71	15.59	14.64
GID-133	Katepwa	Cultivar	CNHR	1981	1981-11-16	National Registration	Secan Association	86.88	85.33	89.27	95.64	4.23	4.37	15.72	15.01
GID-134	Kenyon	Cultivar	CWRS	1985	1985-11-07	Cancelled	Secan Association	87.09	84.28	90.03	93.24	3.82	4.21	15.6	15.22
GID-135	Lancer	Cultivar	CWRS	1985	1985-05-15	Cancelled	Secan Association	88.33	88.28	90.49	98.41	3.78	3.97	17.25	16.14
GID-136	Laser	Cultivar	CWES	1999	1999-05-05	Regional Registration	University of Alberta	86.1	84.08	87.06	89.57	4.66	4.72	15.89	15.25
GID-137	Laura	Cultivar	CWRS	1986	1986-12-23	National Registration	Secan Association	90.41	87.66	82.58	90.1	3.94	4.18	16.42	15.15
GID-138	Leader	Cultivar	CNHR	1981	1981-03-25	National Registration	Secan Association	88.06	87.28	87.68	91.28	3.72	4.42	17.18	16.24
GID-139	Lillian	Cultivar	CNHR	2003	2003-09-04	Regional Registration	Secan Association	86.81	85.25	84.37	88.64	4.28	5.07	16.22	16.18		Yes (N=22)
GID-140	Lovitt	Cultivar	CWRS	2002	2002-11-08	Regional Registration	Canterra Seeds	86.78	86.53	87.16	95.28	4.05	5	16.24	16.33		Yes (N=22)
GID-141	Manitou	Cultivar	CWRS	1965	1965-02-22	Cancelled	Agriculture and AgriFood Canada	86.57	84.33	91.3	96.29	3.9	4.46	16.06	15.06
GID-142	Marquis	Cultivar	CWRS	1923	1923-01-01	Cancelled	Agriculture and AgriFood Canada	89.97	89.26	98.69	102.57	3.62	3.95	15.59	15.16
GID-143	McKenzie	Cultivar	CNHR	1997	1997-10-20	National Registration	Nutrien AG Solutions Inc.	84.05	82.88	83.07	92.25	4.3	4.99	15	14.34
GID-144	Minnedosa	Cultivar	CWSP	2009	2009-03-06	Regional Registration	Agriculture and AgriFood Canada	89.24	86.97	82.07	82.25	5.05	5.25	13.88	13.41
GID-145	Muchmore	Cultivar	CNHR	2009	2009-09-18	Regional Registration	Agriculture and AgriFood Canada	92.13	88.86	73.22	76.96	4.94	5.05	14.83	13.81
GID-146	Napayo	Cultivar	CWRS	1972	1972-04-05	Cancelled	Agriculture and AgriFood Canada	88.51	85.54	88.42	93.6	4.28	4.44	16.29	15.49
GID-147	Neepawa	Cultivar	CNHR	1969	1969-03-24	National Registration	Agriculture and AgriFood Canada	87.63	85.59	88.76	98.03	4.18	4.54	15.82	15.56
GID-148	Oslo	Cultivar	CNHR	1987	1987-03-18	National Registration	Nutrien AG Solutions Inc.	87.63	85.76	73.04	78.73	4.69	4.82	14.63	13.73
GID-149	Owens	Cultivar	CWSWS	1984	1984-07-31	Cancelled	No representative	91.79	89.94	71.05	75.39	4.37	4.96	12.47	12.09
GID-150	Parata	Cultivar	CWRS	2015	2015-06-11	Regional Registration	University of Alberta	85	82.88	83.39	88.31	4.24	4.42	16.51	15.56
GID-151	Park	Cultivar	CNHR	1963	1963-03-05	National Registration	Agriculture and AgriFood Canada	85.44	82.93	89.78	98.34	4.47	4.72	15.24	14.18
GID-152	Pasqua	Cultivar	CNHR	1990	1990-04-06	National Registration	Secan Association	88.02	87.16	88.49	97.03	3.84	4.36	16.27	16.23
GID-153	Pasteur	Cultivar	CWSP	2011	2011-07-06	National Registration	Plantomar Ltd	97.34	95.11	77.16	78.71	5.86	5.97	13.54	12.18
GID-154	Peace	Cultivar	CWRS	2004	2004-09-23	Regional Registration	Agriculture and AgriFood Canada	89.75	86.45	86.62	97	4.16	5.02	16.43	15.45
GID-155	Pembina	Cultivar	CNHR	1959	1959-11-23	National Registration	Agriculture and AgriFood Canada	84.38	81.5	90.16	96.32	4.14	4.32	15.02	14.66
GID-156	Pitic 62	Cultivar	CWES	1969	1969-01-14	Cancelled	No representative	93.8	90.72	82.05	84.52	5.39	5.6	14.24	13.5
GID-157	Prodigy	Cultivar	CWRS	1998	1998-04-17	Regional Registration	Nutrien AG Solutions Inc.	88.77	86.86	91.06	101.02	4.27	4.41	16.51	16.13
GID-158	AAC Tisdale	Cultivar	CWRS	2017	2017-08-18	Regional Registration	Agriculture and AgriFood Canada	87.85	85.01	79.98	84.15	4.62	5.02	16.43	15.68		Yes (N=22)
GID-159	PT472	Line	CWRS		Not registered		Agriculture and AgriFood Canada	84.76	83.18	86.69	93	4.73	5.01	16.04	15.95		Yes (N=22)
GID-160	PT479	Line	CWRS		Not registered		Agriculture and AgriFood Canada	89.83	87.72	86.16	92.32	4.75	4.82	16.47	15.88
GID-161	CDC Hughes	Cultivar	CWRS	2016	2016-04-29	Regional Registration	University of Saskatchewan	87.28	86.28	79.08	79.27	5.07	5.2	16.11	15.28
GID-162	PT595	Line	CWRS		Not registered		University of Saskatchewan	89.32	85.45	77.52	79.28	4.65	5.06	15.13	14.22
GID-163	PT771	Line	CWRS		Not registered		University of Alberta	85.71	85.27	83.94	93.27	3.16	3.95	16.98	16.37
GID-164	PT778	Line	CWRS		Not registered		University of Alberta	88.86	86.91	77.42	82.39	4.74	5.09	15.07	14.46
GID-165	PT780	Line	CWRS		Not registered		University of Alberta	82.38	80.45	85.67	91.94	4.59	4.99	15.38	15.08
GID-166	Jake	Cultivar	CWRS	2018	2018-11-23	Regional Registration	University of Alberta	85.45	82.59	80.7	85.31	4.51	4.43	16.98	16.18
GID-167	Rednet	Cultivar	CWRS	2018	2018-11-23	Regional Registration	University of Alberta	91.93	89.52	88.55	94.7	4.61	4.61	16.3	15.76
GID-168	Ellerslie	Cultivar	CWRS	2018	2018-11-23	Regional Registration	University of Alberta	88.86	85.61	81.28	82.22	4.85	5.2	15.48	14.73
GID-169	Tracker	Cultivar	CWRS	2018	2018-11-23	Regional Registration	University of Alberta	86.61	85.97	80.41	85.74	4.9	5.32	15.53	15.15
GID-170	Red Bobs No. 222	Line			Exotic			86.06	83.62	90.71	100.63	3.94	4.5	14.88	14.27
GID-171	RL6077	Line	CWRS		Not registered		Agriculture and AgriFood Canada	84.77	83.07	76.44	80.49	4.35	4.55	14.71	13.76
GID-172	Roblin	Cultivar	CWRS	1986	1986-05-13	National Registration	Secan Association	84.63	82.72	84.41	90.2	3.89	4.22	16.54	15.95
GID-173	SAAR	Line			Exotic			93.52	91.23	89.16	91.82	5.27	5.89	14.51	13.27
GID-174	Sadash	Cultivar	CWSWS	2007	2007-08-13	Regional Registration	Agriculture and AgriFood Canada	94.17	90.44	83.4	81.91	5.82	6.13	11.07	10.75
GID-175	Shaw	Cultivar	CWRS	2009	2009-12-02	Regional Registration	Agriculture and AgriFood Canada	87.37	86.75	90.22	93.68	4.62	5.25	14.93	14.75
GID-176	Sinton	Cultivar	CWRS	1975	1975-10-10	Cancelled	Agriculture and AgriFood Canada	90	87.6	91.11	98.12	4.51	4.88	15.39	14.63
GID-177	Snowbird	Cultivar	CWHWS	2004	2004-09-17	Regional Registration	Agriculture and AgriFood Canada	85.88	84.69	83.75	93.62	4.3	4.69	15.14	14.76
GID-178	Snowhite 475	Cultivar	CPSW	2006	2006-04-28	Cancelled	Agriculture and AgriFood Canada	88.15	86.7	76.61	79.19	4.91	4.64	14.42	13.77
GID-179	Snowhite 476	Cultivar	CPSW	2006	2006-05-05	Cancelled	Agriculture and AgriFood Canada	95.19	91.73	82.43	80.29	4.59	4.87	14.87	13.32
GID-180	Snowstar	Cultivar	CWHWS	2009	2009-05-15	National Registration	Agriculture and AgriFood Canada	85.7	83.48	77.08	83.67	4.41	4.57	14.7	13.51
GID-181	Somerset	Cultivar	CWRS	2005	2005-05-20	Regional Registration	Secan Association	86.47	86.06	90.53	98.66	4.01	4.48	17.55	17.68		Yes (N=22)
GID-182	Springfield	Cultivar	CWSWS	1972	1972-03-21	Cancelled	No representative	89.33	86.49	72.64	76.53	3.68	3.98	14.42	13.72
GID-183	Stettler	Cultivar	CWRS	2008	2008-10-16	Regional Registration	Agriculture and AgriFood Canada	89.61	87.76	79.64	87.5	4.9	5.2	16.09	15.15
GID-184	Sumai 3	Line			Exotic			91.99	90.22	93.51	97.38	3.54	3.7	16.23	15.64
GID-185	Superb	Cultivar	CWRS	2001	2001-04-12	National Registration	Agriculture and AgriFood Canada	89.49	86.92	79.84	83.44	5.24	5.6	14.71	14.42
GID-186	SWS52	Cultivar	CWSWS	1905	1905-06-11			95.3	93.48	82.67	78.68	6.56	6.74	11.15	10.58
GID-187	SY087	Cultivar	CWSP	2014	2014-09-08	Regional Registration	Syngenta Canada Inc.	89.33	87.66	80.7	83.3	5.33	5.6	14.48	13.48
GID-188	SY 433	Cultivar	CWRS	2012	2012-05-22	Regional Registration	Syngenta Canada Inc.	88.12	87.72	72.88	80.94	4.81	4.63	16.03	15.19
GID-189	SY479 VB	Cultivar	CWRS	2016	2016-02-12	Regional Registration	Syngenta Canada Inc.	87.83	85.88	88.76	94.51	4.43	4.46	17.09	16.88		Yes (N=22)
GID-190	SY637	Cultivar	CWRS	2016	2016-02-12	Regional Registration	Syngenta Canada Inc.	88.87	86.92	82.12	89	4.28	4.62	16.91	16.29
GID-191	SY985	Cultivar	CPSR	2011	2011-08-02	Regional Registration	Syngenta Canada Inc.	91.03	89.12	79.68	82.04	4.93	5.71	15.13	13.93
GID-192	SY995	Cultivar	CPSR	2014	2014-09-08	Regional Registration	Syngenta Canada Inc.	93.74	91.78	78.47	80.54	5.05	5.74	14.38	13.48
GID-193	Unity	Cultivar	CNHR	2007	2007-08-24	Regional Registration	Agriculture and AgriFood Canada	86.67	84.18	87.51	92.43	4.62	4.87	15.36	15.16
GID-194	Vesper	Cultivar	CNHR	2010	2010-11-15	Regional Registration	Secan Association	87.76	84.87	81.93	89.25	4.98	5.25	14.89	14.17
GID-195	Waskada	Cultivar	CWRS	2007	2007-08-14	National Registration	Agriculture and AgriFood Canada	86.17	83.86	82.78	86.59	4.77	4.88	16.07	15.56
GID-196	Whitehawk	Cultivar	CWHWS	2012	2012-05-22	Regional Registration	Agriculture and AgriFood Canada	84.46	82.53	84.55	90.64	3.12	3.75	15.99	15.31
GID-197	Wildcat	Cultivar	CWES	1987	1987-02-10	National Registration	Secan Association	94.42	92.3	81.47	80.87	4.5	3.98	12.76	12.1
GID-198	WR859 CL	Cultivar	CWRS	2009	2009-06-19	Regional Registration	Syngenta Canada Inc.	87.18	86.39	79.47	85.49	4.58	4.57	15.81	15.52
	*Abbreviation:
	Canada Prairie Spring Red (CPSR)
	Canada Western Soft White Spring (CWSWS)
	Canada Northern Hard Red (CNHR)
	Canada Prairie Spring White (CPSW)
	Canada Western Extra Strong (CWES)
	Canada Western Hard White Spring (CWHWS)
	Canada Western Red Spring (CWRS)
	Canada Western Special Purpose (CWSP)
