# Supplementary material for: Identification of Spring Wheat with Superior Agronomic Performance under Contrasting Nitrogen Managements Using Linear Phenotypic Selection Indices
Source: Plants (Basel). 2022 Jul 20;11(14):1887. doi: 10.3390/plants11141887 (PMC9317689; doi:10.3390/plants11141887)
Supplement: Supplementary file 1 [file plants-11-01887-s001.zip › Table S2 29042022.txt]

Table S2 The R codes used to compute the best combinations of economic weights and the final analysis using 
the Smith Linear Phenotypic Selection Index (LPSI) and the Kempthorne and Nordskog Restrictive Linear Phenotypic
Selection Index (RLPSI). In contrast to LPSI which did not impose a restriction, RLPSI was run by restricting 
the expected genetic gain either for grain yield or grain protein content to zero.

# The codes are examples for one economic weight 
# Economic weight for maturity = -1, plant height = -1, grain yield =120, GPC = 70
# Restrictions: 0= no restriction; 1 = expected genetic gain restricted (fixed) to zero


1. An example for RLPSI by restricting the expected genetic gain for grain yield to zero

rm(list=ls())
setwd("C:/R/SpringWheat/Selection-indices/Data")

P<- as.matrix(read.csv("BVC-Con-P-matrix.csv", header = TRUE, nrows =4))		# Phenotypic covariate matrix
G <- as.matrix(read.csv("BVC-Con-G-matrix.csv", header = TRUE, nrows =4)) 		# Genotypic covariate matrix
Y<- as.matrix(read.csv("BVC-Con-BLUE-4traits.csv", header = TRUE, nrows =196))		# BLUE computed from all environments per management
GID<- as.matrix(read.csv("BVC-GID.csv", header = TRUE, nrows =196))			# Germplasm identifier

IP=solve(P);IP          # P inverse matrix
w=c(-1,-1,120,70); w    # Economic weights
b=IP%*%G%*%w; b         # LPSI vector of coefficients

CC1=c(0,0,1,0)          # Grain yield restricted

Ut=rbind(CC1);   Ut
At=Ut%*%G; At
II=diag(c(1,1,1,1)); II
IQ=solve(At%*%IP%*%t(At)); IQ
Q=IP%*%t(At)%*%IQ%*%At; Q
KK=II-Q; KK
bs=KK%*%b; bs                           # RLPSI vector of coefficients

ks=1.755                                # Selecion intensity
Vp=t(bs)%*%P%*%bs; Vp ; SD=sqrt(Vp); SD    # Variance and standard deviation of the RLPSI
Es=(ks*(G%*%bs))/as.vector(SD) ; Es  # Estimated Expected genetic gain per trait
Rs=ks*SD;Rs                           # Estimated LRPSI Selection response
VH=t(w)%*%G%*%w; SH=sqrt(VH);  VH; SH  # Variance and standard deviation of the net genetic merit H
corHI=SD/SH;   corHI                   # Estimated correlation between the RLPSI and H

LSI=Y%*%bs              # Estimated RLPSI values
datos <-data.frame(GID=GID, Y=Y,LSI=LSI)
datos <- datos[with(datos, order(-LSI)), ] # Orden inverso

write.table(datos, "C:/R/SpringWheat/Selection-indices/Data/Results/BVC-RLPSI-Con-YieldFixed-Weight1-All.txt", sep="\t")
X5=datos[1:20,1:6]
write.table(X5, "C:/R/SpringWheat/Selection-indices/Data/Results/BVC-RLPSI-Con-YieldFixed-Weight1-selected.txt", sep="\t")


2. Example for RLPSI by restricting the expected genetic gain for GPC to zero

rm(list=ls())
setwd("C:/R/SpringWheat/Selection-indices/Data")

P<- as.matrix(read.csv("BVC-Con-P-matrix.csv", header = TRUE, nrows =4))		# Phenotypic covariate matrix
G <- as.matrix(read.csv("BVC-Con-G-matrix.csv", header = TRUE, nrows =4)) 		# Genotypic covariate matrix
Y<- as.matrix(read.csv("BVC-Con-BLUE-4traits.csv", header = TRUE, nrows =196))		# BLUE computed from all environments per management
GID<- as.matrix(read.csv("BVC-GID.csv", header = TRUE, nrows =196))			# Germplasm identifier

IP=solve(P);IP          # P inverse matrix
w=c(-1,-1,120,70); w    # Economic weights
b=IP%*%G%*%w; b         # LPSI vector of coefficients

CC1=c(0,0,0,1)          # GPC restricted

Ut=rbind(CC1);   Ut
At=Ut%*%G; At
II=diag(c(1,1,1,1)); II
IQ=solve(At%*%IP%*%t(At)); IQ
Q=IP%*%t(At)%*%IQ%*%At; Q
KK=II-Q; KK
bs=KK%*%b; bs                           # RLPSI vector of coefficients

ks=1.755                                # Selecion intensity
Vp=t(bs)%*%P%*%bs; Vp ; SD=sqrt(Vp); SD    # Variance and standard deviation of the RLPSI
Es=(ks*(G%*%bs))/as.vector(SD) ; Es  # Estimated Expected genetic gain per trait
Rs=ks*SD;Rs                           # Estimated LRPSI Selection response
VH=t(w)%*%G%*%w; SH=sqrt(VH);  VH; SH  # Variance and standard deviation of the net genetic merit H
corHI=SD/SH;   corHI                   # Estimated correlation between the RLPSI and H

LSI=Y%*%bs              # Estimated RLPSI values
datos <-data.frame(GID=GID, Y=Y,LSI=LSI)
datos <- datos[with(datos, order(-LSI)), ] # Orden inverso

write.table(datos, "C:/R/SpringWheat/Selection-indices/Data/Results/BVC-RLPSI-Con-GPCFixed-Weight1-All.txt", sep="\t")
X5=datos[1:20,1:6]
write.table(X5, "C:/R/SpringWheat/Selection-indices/Data/Results/BVC-RLPSI-Con-GPCFixed-Weight1-selected.txt", sep="\t")


3. Example for LPSI without restricting any trait

rm(list=ls())
setwd("C:/R/SpringWheat/Selection-indices/Data")

P<- as.matrix(read.csv("BVC-Con-P-matrix.csv", header = TRUE, nrows =4))		# Phenotypic covariate matrix
G <- as.matrix(read.csv("BVC-Con-G-matrix.csv", header = TRUE, nrows =4)) 		# Genotypic covariate matrix
Y<- as.matrix(read.csv("BVC-Con-BLUE-4traits.csv", header = TRUE, nrows =196))		# BLUE computed from all environments per management
GID<- as.matrix(read.csv("BVC-GID.csv", header = TRUE, nrows =196))			# Germplasm identifier

IP=solve(P);IP          # P inverse matrix
w=c(-1,-1,120,70); w    # Economic weights
b=IP%*%G%*%w; b         # LPSI vector of coefficients
ks=1.755                                # Selecion intensity
Vp=t(b)%*%P%*%b; Vp ; SD=sqrt(Vp); SD    # Variance and standard deviation of the LPSI
Es=(ks*(G%*%b))/as.vector(SD) ; Es  # Estimated Expected genetic gain per trait
Rs=ks*SD;Rs                           # Estimated LPSI Selection response
VH=t(w)%*%G%*%w; SH=sqrt(VH);  VH; SH  # Variance and standard deviation of the net genetic merit H
corHI=SD/SH;   corHI                   # Estimated correlation between the RLPSI and H

LSI=Y%*%b              # Estimated LPSI values
datos <-data.frame(GID=GID, Y=Y,LSI=LSI)
datos <- datos[with(datos, order(-LSI)), ] # Orden inverso

write.table(datos, "C:/R/SpringWheat/Selection-indices/Data/Results/BVC-LPSI-Con-YieldFixed-Weight1-All.txt", sep="\t")
X5=datos[1:20,1:6]
write.table(X5, "C:/R/SpringWheat/Selection-indices/Data/Results/BVC-LPSI-Con-YieldFixed-Weight1-selected.txt", sep="\t")
