# Supplementary material for: Identification of Spring Wheat with Superior Agronomic Performance under Contrasting Nitrogen Managements Using Linear Phenotypic Selection Indices
Source: Plants (Basel). 2022 Jul 20;11(14):1887. doi: 10.3390/plants11141887 (PMC9317689; doi:10.3390/plants11141887)
Supplement: Supplementary file 1 [file plants-11-01887-s001.zip › Table S3 29042022.xlsx]

## Sheet: Details
Table S3 Summary of cultivars selected based on either their higher grain yield or grain protein content (GPC) under conventionally (Con) and/or organically (Org) managed environments.
GID	Management	BLUE_Yield	BLUE_GPC	Cultivar	Comments based on trait
GID-181	Org	4.48367	17.6802	Somerset	Selected based on grain protein content under organic management
GID-181	Con	4.0119	17.5534	Somerset	Selected based on grain protein content under conventional management
GID-092	Con	4.39882	17.3675	CDC VR Morris	Selected based on grain protein content under conventional management
GID-135	Con	3.78248	17.2466	Lancer	Selected based on grain protein content under conventional management
GID-068	Con	4.26186	17.2388	BYT14-19	Selected based on grain protein content under conventional management
GID-138	Con	3.718	17.175	Leader	Selected based on grain protein content under conventional management
GID-189	Con	4.4337	17.0857	SY479 VB	Selected based on grain protein content under conventional management
GID-163	Con	3.16435	16.9835	PT771	Selected based on grain protein content under conventional management
GID-092	Org	4.56976	16.9796	CDC VR Morris	Selected based on grain protein content under organic management
GID-166	Con	4.50735	16.978	Jake	Selected based on grain protein content under conventional management
GID-190	Con	4.27943	16.9083	SY637	Selected based on grain protein content under conventional management
GID-031	Con	3.9201	16.8963	AC Eatonia	Selected based on grain protein content under conventional management
GID-189	Org	4.46407	16.88	SY479 VB	Selected based on grain protein content under organic management
GID-026	Con	4.47809	16.8635	AC Cadillac	Selected based on grain protein content under conventional management
GID-002	Con	4.85515	16.7022	5605HR CL	Selected based on grain protein content under conventional management
GID-124	Con	4.97447	16.6319	AAC Castle	Selected based on grain protein content under conventional management
GID-025	Con	4.33438	16.6315	AC Barrie	Selected based on grain protein content under conventional management
GID-068	Org	4.4667	16.6209	BYT14-19	Selected based on grain protein content under organic management
GID-054	Con	4.86774	16.5986	Burnside	Selected based on grain protein content under conventional management
GID-172	Con	3.89374	16.5398	Roblin	Selected based on grain protein content under conventional management
GID-026	Org	4.97029	16.5225	AC Cadillac	Selected based on grain protein content under organic management
GID-157	Con	4.26825	16.5064	Prodigy	Selected based on grain protein content under conventional management
GID-150	Con	4.23654	16.5051	Parata	Selected based on grain protein content under conventional management
GID-027	Con	3.96875	16.503	AC Cora	Selected based on grain protein content under conventional management
GID-056	Con	4.12463	16.4895	BW278	Selected based on grain protein content under conventional management
GID-163	Org	3.95233	16.3682	PT771	Selected based on grain protein content under organic management
GID-031	Org	4.3878	16.3379	AC Eatonia	Selected based on grain protein content under organic management
GID-140	Org	5.00446	16.3284	Lovitt	Selected based on grain protein content under organic management
GID-025	Org	4.4334	16.3186	AC Barrie	Selected based on grain protein content under organic management
GID-190	Org	4.61955	16.2877	SY637	Selected based on grain protein content under organic management
GID-138	Org	4.4171	16.2395	Leader	Selected based on grain protein content under organic management
GID-152	Org	4.35854	16.2344	Pasqua	Selected based on grain protein content under organic management
GID-166	Org	4.42778	16.182	Jake	Selected based on grain protein content under organic management
GID-139	Org	5.07351	16.177	Lillian	Selected based on grain protein content under organic management
GID-135	Org	3.96702	16.1429	Lancer	Selected based on grain protein content under organic management
GID-157	Org	4.41008	16.1281	Prodigy	Selected based on grain protein content under organic management
GID-076	Org	5.03914	16.0703	CDC Bounty	Selected based on grain protein content under organic management
GID-159	Org	5.01113	15.9466	PT472	Selected based on grain protein content under organic management
GID-172	Org	4.21901	15.946	Roblin	Selected based on grain protein content under organic management
GID-074	Org	5.21011	15.9407	CDC Alsask	Selected based on grain protein content under organic management
GID-007	Con	5.23696	15.7177	AAC Brandon	Selected based on grain yield under conventional management
GID-096	Con	5.25451	15.4398	CDN Bison	Selected based on grain yield under conventional management
GID-062	Con	5.63635	15.1494	AAC Goodwin	Selected based on grain yield under conventional management
GID-099	Org	6.17373	14.7004	Conquer	Selected based on grain yield under organic management
GID-067	Con	5.28115	14.6285	BW5020	Selected based on grain yield under conventional management
GID-062	Org	5.99663	14.6272	AAC Goodwin	Selected based on grain yield under organic management
GID-173	Con	5.27336	14.5102	SAAR	Selected based on grain yield under conventional management
GID-187	Con	5.33452	14.4813	SY087	Selected based on grain yield under conventional management
GID-035	Con	5.2568	14.2813	AC Karma	Selected based on grain yield under conventional management
GID-156	Con	5.38527	14.2353	Pitic 62	Selected based on grain yield under conventional management
GID-104	Con	5.49137	14.2319	Faller	Selected based on grain yield under conventional management
GID-121	Org	5.74116	14.132	CDC Cordon CLPlus	Selected based on grain yield under organic management
GID-013	Org	5.72224	14.1108	AAC Foray	Selected based on grain yield under organic management
GID-019	Con	5.33793	14.0641	AAC Ryley	Selected based on grain yield under conventional management
GID-115	Con	5.85411	13.9721	CDC Throttle	Selected based on grain yield under conventional management
GID-191	Org	5.71337	13.9306	SY985	Selected based on grain yield under organic management
GID-005	Con	5.34548	13.8728	5702PR	Selected based on grain yield under conventional management
GID-153	Con	5.86192	13.544	Pasteur	Selected based on grain yield under conventional management
GID-192	Org	5.74211	13.4809	SY995	Selected based on grain yield under organic management
GID-104	Org	6.02343	13.4691	Faller	Selected based on grain yield under organic management
GID-005	Org	5.9173	13.3393	5702PR	Selected based on grain yield under organic management
GID-173	Org	5.8886	13.2716	SAAR	Selected based on grain yield under organic management
GID-003	Org	5.6438	13.135	5700PR	Selected based on grain yield under organic management
GID-105	Con	5.45301	13.1276	Fielder	Selected based on grain yield under conventional management
GID-115	Org	6.40625	13.0847	CDC Throttle	Selected based on grain yield under organic management
GID-116	Con	6.12091	12.3842	AAC Awesome	Selected based on grain yield under conventional management
GID-051	Con	5.2819	12.2011	Bhishaj	Selected based on grain yield under conventional management
GID-153	Org	5.96925	12.1796	Pasteur	Selected based on grain yield under organic management
GID-105	Org	5.68488	12.0059	Fielder	Selected based on grain yield under organic management
GID-117	Con	5.38706	11.7909	GP168	Selected based on grain yield under conventional management
GID-024	Con	6.00746	11.773	AC Andrew	Selected based on grain yield under conventional management
GID-116	Org	6.49678	11.7168	AAC Awesome	Selected based on grain yield under organic management
GID-051	Org	6.1536	11.7115	Bhishaj	Selected based on grain yield under organic management
GID-024	Org	5.94059	11.4916	AC Andrew	Selected based on grain yield under organic management
GID-117	Org	6.13895	11.31	GP168	Selected based on grain yield under organic management
GID-186	Con	6.56442	11.1499	SWS52	Selected based on grain yield under conventional management
GID-041	Org	5.88007	11.135	AC Phil	Selected based on grain yield under organic management
GID-174	Con	5.81781	11.0715	Sadash	Selected based on grain yield under conventional management
GID-174	Org	6.12788	10.7527	Sadash	Selected based on grain yield under organic management
GID-186	Org	6.74317	10.5809	SWS52	Selected based on grain yield under organic management

## Sheet: Summary
Cultivar	Selection based on single trait	Selection based on LPSI and RLPSI
5605HR CL	Selected using GPC in Con	Selected (N=22)
5700PR	Selected using yield in Org
5702PR	Selected using yield in both Con and Org
AAC Awesome	Selected using yield in both Con and Org
AAC Brandon	Selected using yield in Con	Selected (N=22)
AAC Castle	Selected using GPC in Con	Selected (N=22)
AAC Foray	Selected using yield in Org
AAC Goodwin	Selected using yield in both Con and Org	Selected (N=22)
AAC Ryley	Selected using yield in Con
AC Andrew	Selected using yield in both Con and Org
AC Barrie	Selected using GPC in both Con and Org
AC Cadillac	Selected using GPC in both Con and Org	Selected (N=22)
AC Cora	Selected using GPC in Con
AC Eatonia	Selected using GPC in both Con and Org
AC Karma	Selected using yield in Con
AC Phil	Selected using yield in Org
Bhishaj	Selected using yield in both Con and Org
Burnside	Selected using GPC in Con
BW278	Selected using GPC in Con
BW5020	Selected using yield in Con
BYT14-19	Selected using GPC in both Con and Org	Selected (N=22)
CDC Alsask	Selected using GPC in Org	Selected (N=22)
CDC Bounty	Selected using GPC in Org	Selected (N=22)
CDC Cordon CLPlus	Selected using yield in Org
CDC Throttle	Selected using yield in both Con and Org
CDC VR Morris	Selected using GPC in both Con and Org	Selected (N=22)
CDN Bison	Selected using yield in Con
Conquer	Selected using yield in Org	Selected (N=22)
Faller	Selected using yield in both Con and Org
Fielder	Selected using yield in both Con and Org
GP168	Selected using yield in both Con and Org
Jake	Selected using GPC in both Con and Org
Lancer	Selected using GPC in both Con and Org
Leader	Selected using GPC in both Con and Org
Lillian	Selected using GPC in Org	Selected (N=22)
Lovitt	Selected using GPC in Org	Selected (N=22)
Parata	Selected using GPC in Con
Pasqua	Selected using GPC in Org
Pasteur	Selected using yield in both Con and Org
Pitic 62	Selected using yield in Con
Prodigy	Selected using GPC in both Con and Org
PT472	Selected using GPC in Org	Selected (N=22)
PT771	Selected using GPC in both Con and Org
Roblin	Selected using GPC in both Con and Org
SAAR	Selected using yield in both Con and Org
Sadash	Selected using yield in both Con and Org
Somerset	Selected using GPC in both Con and Org	Selected (N=22)
SWS52	Selected using yield in both Con and Org
SY087	Selected using yield in Con
SY479 VB	Selected using GPC in both Con and Org	Selected (N=22)
SY637	Selected using GPC in both Con and Org
SY985	Selected using yield in Org
SY995	Selected using yield in Org
