# Supplementary material for: Identification of Spring Wheat with Superior Agronomic Performance under Contrasting Nitrogen Managements Using Linear Phenotypic Selection Indices
Source: Plants (Basel). 2022 Jul 20;11(14):1887. doi: 10.3390/plants11141887 (PMC9317689; doi:10.3390/plants11141887)
Supplement: Supplementary file 1 [file plants-11-01887-s001.zip › Table S4 29042022.xlsx]

## Sheet: A) GPC restricted
Table S4 Summary of the selection parameters (expected genetic gain per trait, response to selection, and correlation between the index and the genetic merit) for a total of 2,304 economic weights. The analyses were done using the Kempthorne and Nordskog Restrictive Linear Phenotypic Selection Index (RLPSI) and the best linear unbiased estimators (BLUEs) computed from all 9 environments regardles…
A) RLPSI computed by restricting the expected genetic gain for grain protein content to zero
Population	Management	Weight (Mat)	Weight (Height)	Weight (Yield)	Weight (GPC)	All traits weight	Restricted trait	Exp. gain (Mat)	Exp. gain (Pht)	Exp. gain (Yield)	Exp. gain (GPC)	Response	Correlation	Maturity (d)	Height (cm)	Yield (t/ha)	GPC (%)	RLPSI	Comment
BVC	Both	Mat=-01	Pht=-01	Yld=001	Gpc=01	w(-1,-1,1,1)	GPC=0	-0.178668	-12.5344	0.180626	2.12167e-16	12.8937	0.978618	92.476	75.981	3.9865	14.7585	-82.035
BVC	Both	Mat=-01	Pht=-01	Yld=001	Gpc=10	w(-1,-1,1,10)	GPC=0	-0.178668	-12.5344	0.180626	3.18251e-16	12.8937	0.641307	92.476	75.981	3.9865	14.7585	-82.035
BVC	Both	Mat=-01	Pht=-01	Yld=001	Gpc=20	w(-1,-1,1,20)	GPC=0	-0.178668	-12.5344	0.180626	5.8346e-16	12.8937	0.396321	92.476	75.981	3.9865	14.7585	-82.035
BVC	Both	Mat=-01	Pht=-01	Yld=001	Gpc=30	w(-1,-1,1,30)	GPC=0	-0.178668	-12.5344	0.180626	7.42586e-16	12.8937	0.279276	92.476	75.981	3.9865	14.7585	-82.035
BVC	Both	Mat=-01	Pht=-01	Yld=001	Gpc=40	w(-1,-1,1,40)	GPC=0	-0.178668	-12.5344	0.180626	1.00779e-15	12.8937	0.214197	92.476	75.981	3.9865	14.7585	-82.035
BVC	Both	Mat=-01	Pht=-01	Yld=001	Gpc=50	w(-1,-1,1,50)	GPC=0	-0.178668	-12.5344	0.180626	1.273e-15	12.8937	0.173318	92.476	75.981	3.9865	14.7585	-82.035
BVC	Both	Mat=-01	Pht=-01	Yld=001	Gpc=60	w(-1,-1,1,60)	GPC=0	-0.178668	-12.5344	0.180626	1.273e-15	12.8937	0.145396	92.476	75.981	3.9865	14.7585	-82.035
BVC	Both	Mat=-01	Pht=-01	Yld=001	Gpc=70	w(-1,-1,1,70)	GPC=0	-0.178668	-12.5344	0.180626	1.59126e-15	12.8937	0.12516	92.476	75.981	3.9865	14.7585	-82.035
BVC	Both	Mat=-01	Pht=-01	Yld=001	Gpc=80	w(-1,-1,1,80)	GPC=0	-0.178668	-12.5344	0.180626	1.75038e-15	12.8937	0.109837	92.476	75.981	3.9865	14.7585	-82.035
BVC	Both	Mat=-01	Pht=-01	Yld=010	Gpc=01	w(-1,-1,10,1)	GPC=0	0.129888	-12.376	0.270993	-9.1455e-17	14.9561	1.0607	93.0125	76.9825	4.0905	14.831	-15.2659
BVC	Both	Mat=-01	Pht=-01	Yld=010	Gpc=10	w(-1,-1,10,10)	GPC=0	0.129888	-12.376	0.270993	7.3164e-16	14.9561	0.83004	93.0125	76.9825	4.0905	14.831	-15.2659
BVC	Both	Mat=-01	Pht=-01	Yld=010	Gpc=20	w(-1,-1,10,20)	GPC=0	0.129888	-12.376	0.270993	1.55474e-15	14.9561	0.509276	93.0125	76.9825	4.0905	14.831	-15.2659
BVC	Both	Mat=-01	Pht=-01	Yld=010	Gpc=30	w(-1,-1,10,30)	GPC=0	0.129888	-12.376	0.270993	1.8291e-15	14.9561	0.350663	93.0125	76.9825	4.0905	14.831	-15.2659
BVC	Both	Mat=-01	Pht=-01	Yld=010	Gpc=40	w(-1,-1,10,40)	GPC=0	0.129888	-12.376	0.270993	2.6522e-15	14.9561	0.26461	93.0125	76.9825	4.0905	14.831	-15.2659
BVC	Both	Mat=-01	Pht=-01	Yld=010	Gpc=50	w(-1,-1,10,50)	GPC=0	0.129888	-12.376	0.270993	3.29238e-15	14.9561	0.211742	93.0125	76.9825	4.0905	14.831	-15.2659
BVC	Both	Mat=-01	Pht=-01	Yld=010	Gpc=60	w(-1,-1,10,60)	GPC=0	0.129888	-12.376	0.270993	4.11548e-15	14.9561	0.17623	93.0125	76.9825	4.0905	14.831	-15.2659
BVC	Both	Mat=-01	Pht=-01	Yld=010	Gpc=70	w(-1,-1,10,70)	GPC=0	0.129888	-12.376	0.270993	4.75566e-15	14.9561	0.150813	93.0125	76.9825	4.0905	14.831	-15.2659
BVC	Both	Mat=-01	Pht=-01	Yld=010	Gpc=80	w(-1,-1,10,80)	GPC=0	0.129888	-12.376	0.270993	5.39585e-15	14.9561	0.131754	93.0125	76.9825	4.0905	14.831	-15.2659
BVC	Both	Mat=-01	Pht=-01	Yld=020	Gpc=01	w(-1,-1,20,1)	GPC=0	0.370098	-11.7345	0.33164	-1.52002e-16	17.9972	1.03405	93.199	77.7955	4.152	14.777	59.414
BVC	Both	Mat=-01	Pht=-01	Yld=020	Gpc=10	w(-1,-1,20,10)	GPC=0	0.370098	-11.7345	0.33164	3.04004e-16	17.9972	1.01833	93.199	77.7955	4.152	14.777	59.414
BVC	Both	Mat=-01	Pht=-01	Yld=020	Gpc=20	w(-1,-1,20,20)	GPC=0	0.370098	-11.7345	0.33164	9.12012e-16	17.9972	0.670364	93.199	77.7955	4.152	14.777	59.414
BVC	Both	Mat=-01	Pht=-01	Yld=020	Gpc=30	w(-1,-1,20,30)	GPC=0	0.370098	-11.7345	0.33164	1.36802e-15	17.9972	0.457417	93.199	77.7955	4.152	14.777	59.414
BVC	Both	Mat=-01	Pht=-01	Yld=020	Gpc=40	w(-1,-1,20,40)	GPC=0	0.370098	-11.7345	0.33164	2.28003e-15	17.9972	0.340466	93.199	77.7955	4.152	14.777	59.414
BVC	Both	Mat=-01	Pht=-01	Yld=020	Gpc=50	w(-1,-1,20,50)	GPC=0	0.370098	-11.7345	0.33164	2.73604e-15	17.9972	0.269508	93.199	77.7955	4.152	14.777	59.414
BVC	Both	Mat=-01	Pht=-01	Yld=020	Gpc=60	w(-1,-1,20,60)	GPC=0	0.370098	-11.7345	0.33164	6.72405e-16	17.9972	0.222489	93.199	77.7955	4.152	14.777	59.414
BVC	Both	Mat=-01	Pht=-01	Yld=020	Gpc=70	w(-1,-1,20,70)	GPC=0	0.370098	-11.7345	0.33164	3.80005e-15	17.9972	0.189224	93.199	77.7955	4.152	14.777	59.414
BVC	Both	Mat=-01	Pht=-01	Yld=020	Gpc=80	w(-1,-1,20,80)	GPC=0	0.370098	-11.7345	0.33164	4.40806e-15	17.9972	0.164512	93.199	77.7955	4.152	14.777	59.414
BVC	Both	Mat=-01	Pht=-01	Yld=030	Gpc=01	w(-1,-1,30,1)	GPC=0	0.529147	-11.0342	0.366637	-2.54427e-16	21.5041	0.974339	93.278	78.1745	4.169	14.7785	134.345
BVC	Both	Mat=-01	Pht=-01	Yld=030	Gpc=10	w(-1,-1,30,10)	GPC=0	0.529147	-11.0342	0.366637	1.27213e-16	21.5041	1.10298	93.278	78.1745	4.169	14.7785	134.345
BVC	Both	Mat=-01	Pht=-01	Yld=030	Gpc=20	w(-1,-1,30,20)	GPC=0	0.529147	-11.0342	0.366637	6.36067e-16	21.5041	0.837582	93.278	78.1745	4.169	14.7785	134.345
BVC	Both	Mat=-01	Pht=-01	Yld=030	Gpc=30	w(-1,-1,30,30)	GPC=0	0.529147	-11.0342	0.366637	1.27213e-15	21.5041	0.583737	93.278	78.1745	4.169	14.7785	134.345
BVC	Both	Mat=-01	Pht=-01	Yld=030	Gpc=40	w(-1,-1,30,40)	GPC=0	0.529147	-11.0342	0.366637	1.65377e-15	21.5041	0.432345	93.278	78.1745	4.169	14.7785	134.345
BVC	Both	Mat=-01	Pht=-01	Yld=030	Gpc=50	w(-1,-1,30,50)	GPC=0	0.529147	-11.0342	0.366637	2.03541e-15	21.5041	0.339602	93.278	78.1745	4.169	14.7785	134.345
BVC	Both	Mat=-01	Pht=-01	Yld=030	Gpc=60	w(-1,-1,30,60)	GPC=0	0.529147	-11.0342	0.366637	2.54427e-15	21.5041	0.278449	93.278	78.1745	4.169	14.7785	134.345
BVC	Both	Mat=-01	Pht=-01	Yld=030	Gpc=70	w(-1,-1,30,70)	GPC=0	0.529147	-11.0342	0.366637	3.18033e-15	21.5041	0.235505	93.278	78.1745	4.169	14.7785	134.345
BVC	Both	Mat=-01	Pht=-01	Yld=030	Gpc=80	w(-1,-1,30,80)	GPC=0	0.529147	-11.0342	0.366637	3.43476e-15	21.5041	0.203833	93.278	78.1745	4.169	14.7785	134.345
BVC	Both	Mat=-01	Pht=-01	Yld=040	Gpc=01	w(-1,-1,40,1)	GPC=0	0.636652	-10.4166	0.387593	-2.16393e-16	25.2837	0.922388	93.4485	78.516	4.169	14.828	209.357
BVC	Both	Mat=-01	Pht=-01	Yld=040	Gpc=10	w(-1,-1,40,10)	GPC=0	0.636652	-10.4166	0.387593	0	25.2837	1.10039	93.4485	78.516	4.169	14.828	209.357
BVC	Both	Mat=-01	Pht=-01	Yld=040	Gpc=20	w(-1,-1,40,20)	GPC=0	0.636652	-10.4166	0.387593	4.32786e-16	25.2837	0.971277	93.4485	78.516	4.169	14.828	209.357
BVC	Both	Mat=-01	Pht=-01	Yld=040	Gpc=30	w(-1,-1,40,30)	GPC=0	0.636652	-10.4166	0.387593	1.08197e-15	25.2837	0.716219	93.4485	78.516	4.169	14.828	209.357
BVC	Both	Mat=-01	Pht=-01	Yld=040	Gpc=40	w(-1,-1,40,40)	GPC=0	0.636652	-10.4166	0.387593	1.29836e-15	25.2837	0.534973	93.4485	78.516	4.169	14.828	209.357
BVC	Both	Mat=-01	Pht=-01	Yld=040	Gpc=50	w(-1,-1,40,50)	GPC=0	0.636652	-10.4166	0.387593	1.29836e-15	25.2837	0.419074	93.4485	78.516	4.169	14.828	209.357
BVC	Both	Mat=-01	Pht=-01	Yld=040	Gpc=60	w(-1,-1,40,60)	GPC=0	0.636652	-10.4166	0.387593	1.94754e-15	25.2837	0.342009	93.4485	78.516	4.169	14.828	209.357
BVC	Both	Mat=-01	Pht=-01	Yld=040	Gpc=70	w(-1,-1,40,70)	GPC=0	0.636652	-10.4166	0.387593	2.38032e-15	25.2837	0.28796	93.4485	78.516	4.169	14.828	209.357
BVC	Both	Mat=-01	Pht=-01	Yld=040	Gpc=80	w(-1,-1,40,80)	GPC=0	0.636652	-10.4166	0.387593	2.81311e-15	25.2837	0.248258	93.4485	78.516	4.169	14.828	209.357
BVC	Both	Mat=-01	Pht=-01	Yld=050	Gpc=01	w(-1,-1,50,1)	GPC=0	0.712101	-9.90281	0.400795	-3.74351e-16	29.2305	0.883051	93.4485	78.516	4.169	14.828	284.434
BVC	Both	Mat=-01	Pht=-01	Yld=050	Gpc=10	w(-1,-1,50,10)	GPC=0	0.712101	-9.90281	0.400795	-1.87175e-16	29.2305	1.06319	93.4485	78.516	4.169	14.828	284.434
BVC	Both	Mat=-01	Pht=-01	Yld=050	Gpc=20	w(-1,-1,50,20)	GPC=0	0.712101	-9.90281	0.400795	3.74351e-16	29.2305	1.04918	93.4485	78.516	4.169	14.828	284.434
BVC	Both	Mat=-01	Pht=-01	Yld=050	Gpc=30	w(-1,-1,50,30)	GPC=0	0.712101	-9.90281	0.400795	3.74351e-16	29.2305	0.838445	93.4485	78.516	4.169	14.828	284.434
BVC	Both	Mat=-01	Pht=-01	Yld=050	Gpc=40	w(-1,-1,50,40)	GPC=0	0.712101	-9.90281	0.400795	9.35877e-16	29.2305	0.641923	93.4485	78.516	4.169	14.828	284.434
BVC	Both	Mat=-01	Pht=-01	Yld=050	Gpc=50	w(-1,-1,50,50)	GPC=0	0.712101	-9.90281	0.400795	1.31023e-15	29.2305	0.504989	93.4485	78.516	4.169	14.828	284.434
BVC	Both	Mat=-01	Pht=-01	Yld=050	Gpc=60	w(-1,-1,50,60)	GPC=0	0.712101	-9.90281	0.400795	1.4974e-15	29.2305	0.411479	93.4485	78.516	4.169	14.828	284.434
BVC	Both	Mat=-01	Pht=-01	Yld=050	Gpc=70	w(-1,-1,50,70)	GPC=0	0.712101	-9.90281	0.400795	1.87175e-15	29.2305	0.345419	93.4485	78.516	4.169	14.828	284.434
BVC	Both	Mat=-01	Pht=-01	Yld=050	Gpc=80	w(-1,-1,50,80)	GPC=0	0.712101	-9.90281	0.400795	2.24611e-15	29.2305	0.296871	93.4485	78.516	4.169	14.828	284.434
BVC	Both	Mat=-01	Pht=-01	Yld=060	Gpc=01	w(-1,-1,60,1)	GPC=0	0.767109	-9.48044	0.409526	-3.28751e-16	33.2849	0.853698	93.4485	78.516	4.169	14.828	359.511
BVC	Both	Mat=-01	Pht=-01	Yld=060	Gpc=10	w(-1,-1,60,10)	GPC=0	0.767109	-9.48044	0.409526	-1.64376e-16	33.2849	1.02048	93.4485	78.516	4.169	14.828	359.511
BVC	Both	Mat=-01	Pht=-01	Yld=060	Gpc=20	w(-1,-1,60,20)	GPC=0	0.767109	-9.48044	0.409526	3.28751e-16	33.2849	1.07716	93.4485	78.516	4.169	14.828	359.511
BVC	Both	Mat=-01	Pht=-01	Yld=060	Gpc=30	w(-1,-1,60,30)	GPC=0	0.767109	-9.48044	0.409526	3.28751e-16	33.2849	0.935956	93.4485	78.516	4.169	14.828	359.511
BVC	Both	Mat=-01	Pht=-01	Yld=060	Gpc=40	w(-1,-1,60,40)	GPC=0	0.767109	-9.48044	0.409526	8.21878e-16	33.2849	0.7455	93.4485	78.516	4.169	14.828	359.511
BVC	Both	Mat=-01	Pht=-01	Yld=060	Gpc=50	w(-1,-1,60,50)	GPC=0	0.767109	-9.48044	0.409526	3.28751e-16	33.2849	0.593896	93.4485	78.516	4.169	14.828	359.511
BVC	Both	Mat=-01	Pht=-01	Yld=060	Gpc=60	w(-1,-1,60,60)	GPC=0	0.767109	-9.48044	0.409526	0	33.2849	0.485121	93.4485	78.516	4.169	14.828	359.511
BVC	Both	Mat=-01	Pht=-01	Yld=060	Gpc=70	w(-1,-1,60,70)	GPC=0	0.767109	-9.48044	0.409526	4.93127e-16	33.2849	0.406855	93.4485	78.516	4.169	14.828	359.511
BVC	Both	Mat=-01	Pht=-01	Yld=060	Gpc=80	w(-1,-1,60,80)	GPC=0	0.767109	-9.48044	0.409526	6.57502e-16	33.2849	0.348974	93.4485	78.516	4.169	14.828	359.511
BVC	Both	Mat=-01	Pht=-01	Yld=070	Gpc=01	w(-1,-1,70,1)	GPC=0	0.808597	-9.13201	0.415552	-1.46242e-16	37.412	0.83145	93.591	78.9185	4.176	14.84	434.589
BVC	Both	Mat=-01	Pht=-01	Yld=070	Gpc=10	w(-1,-1,70,10)	GPC=0	0.808597	-9.13201	0.415552	1.46242e-16	37.412	0.981827	93.591	78.9185	4.176	14.84	434.589
BVC	Both	Mat=-01	Pht=-01	Yld=070	Gpc=20	w(-1,-1,70,20)	GPC=0	0.808597	-9.13201	0.415552	0	37.412	1.07394	93.591	78.9185	4.176	14.84	434.589
BVC	Both	Mat=-01	Pht=-01	Yld=070	Gpc=30	w(-1,-1,70,30)	GPC=0	0.808597	-9.13201	0.415552	0	37.412	1.00201	93.591	78.9185	4.176	14.84	434.589
BVC	Both	Mat=-01	Pht=-01	Yld=070	Gpc=40	w(-1,-1,70,40)	GPC=0	0.808597	-9.13201	0.415552	2.92485e-16	37.412	0.837938	93.591	78.9185	4.176	14.84	434.589
BVC	Both	Mat=-01	Pht=-01	Yld=070	Gpc=50	w(-1,-1,70,50)	GPC=0	0.808597	-9.13201	0.415552	2.92485e-16	37.412	0.681722	93.591	78.9185	4.176	14.84	434.589
BVC	Both	Mat=-01	Pht=-01	Yld=070	Gpc=60	w(-1,-1,70,60)	GPC=0	1.14541	-4.57302	0.636367	0	47.9733	0.488115	90.34	80.258	5.4915	14.6755	459.783
BVC	Both	Mat=-01	Pht=-01	Yld=070	Gpc=70	w(-1,-1,70,70)	GPC=0	1.14541	-4.57302	0.636367	4.56189e-16	47.9733	0.411992	90.34	80.258	5.4915	14.6755	459.783
BVC	Both	Mat=-01	Pht=-01	Yld=070	Gpc=80	w(-1,-1,70,80)	GPC=0	0.808597	-9.13201	0.415552	1.75491e-15	37.412	0.4039	93.591	78.9185	4.176	14.84	434.589
BVC	Both	Mat=-01	Pht=-01	Yld=080	Gpc=01	w(-1,-1,80,1)	GPC=0	0.840807	-8.84195	0.419864	0	41.5903	0.814206	93.7225	79.402	4.199	14.801	509.757
BVC	Both	Mat=-01	Pht=-01	Yld=080	Gpc=10	w(-1,-1,80,10)	GPC=0	0.840807	-8.84195	0.419864	0	41.5903	0.949134	93.7225	79.402	4.199	14.801	509.757
BVC	Both	Mat=-01	Pht=-01	Yld=080	Gpc=20	w(-1,-1,80,20)	GPC=0	0.840807	-8.84195	0.419864	-1.31551e-16	41.5903	1.05559	93.7225	79.402	4.199	14.801	509.757
BVC	Both	Mat=-01	Pht=-01	Yld=080	Gpc=30	w(-1,-1,80,30)	GPC=0	1.1903	-4.41096	0.639138	2.01327e-16	54.3517	0.900729	90.34	80.258	5.4915	14.6755	545.559
BVC	Both	Mat=-01	Pht=-01	Yld=080	Gpc=40	w(-1,-1,80,40)	GPC=0	0.840807	-8.84195	0.419864	-1.31551e-16	41.5903	0.913354	93.7225	79.402	4.199	14.801	509.757
BVC	Both	Mat=-01	Pht=-01	Yld=080	Gpc=50	w(-1,-1,80,50)	GPC=0	0.840807	-8.84195	0.419864	1.31551e-16	41.5903	0.764135	93.7225	79.402	4.199	14.801	509.757
BVC	Both	Mat=-01	Pht=-01	Yld=080	Gpc=60	w(-1,-1,80,60)	GPC=0	0.840807	-8.84195	0.419864	2.63101e-16	41.5903	0.636456	93.7225	79.402	4.199	14.801	509.757
BVC	Both	Mat=-01	Pht=-01	Yld=080	Gpc=70	w(-1,-1,80,70)	GPC=0	0.840807	-8.84195	0.419864	0	41.5903	0.537069	93.7225	79.402	4.199	14.801	509.757
BVC	Both	Mat=-01	Pht=-01	Yld=080	Gpc=80	w(-1,-1,80,80)	GPC=0	0.840807	-8.84195	0.419864	0	41.5903	0.46091	93.7225	79.402	4.199	14.801	509.757
BVC	Both	Mat=-01	Pht=-01	Yld=090	Gpc=01	w(-1,-1,90,1)	GPC=0	0.866433	-8.59788	0.423046	-2.38889e-16	45.8056	0.800543	93.7225	79.402	4.199	14.801	584.953
BVC	Both	Mat=-01	Pht=-01	Yld=090	Gpc=10	w(-1,-1,90,10)	GPC=0	0.866433	-8.59788	0.423046	2.38889e-16	45.8056	0.921964	93.7225	79.402	4.199	14.801	584.953
BVC	Both	Mat=-01	Pht=-01	Yld=090	Gpc=20	w(-1,-1,90,20)	GPC=0	1.22529	-4.2813	0.641081	1.80113e-16	60.7533	0.925788	90.34	80.258	5.4915	14.6755	631.336
BVC	Both	Mat=-01	Pht=-01	Yld=090	Gpc=30	w(-1,-1,90,30)	GPC=0	1.22529	-4.2813	0.641081	-1.80113e-16	60.7533	0.922495	90.34	80.258	5.4915	14.6755	631.336
BVC	Both	Mat=-01	Pht=-01	Yld=090	Gpc=40	w(-1,-1,90,40)	GPC=0	1.22529	-4.2813	0.641081	0	60.7533	0.840537	90.34	80.258	5.4915	14.6755	631.336
BVC	Both	Mat=-01	Pht=-01	Yld=090	Gpc=50	w(-1,-1,90,50)	GPC=0	0.866433	-8.59788	0.423046	2.38889e-16	45.8056	0.837241	93.7225	79.402	4.199	14.801	584.953
BVC	Both	Mat=-01	Pht=-01	Yld=090	Gpc=60	w(-1,-1,90,60)	GPC=0	1.22529	-4.2813	0.641081	1.80113e-16	60.7533	0.621126	90.34	80.258	5.4915	14.6755	631.336
BVC	Both	Mat=-01	Pht=-01	Yld=090	Gpc=70	w(-1,-1,90,70)	GPC=0	0.866433	-8.59788	0.423046	1.19444e-15	45.8056	0.603075	93.7225	79.402	4.199	14.801	584.953
BVC	Both	Mat=-01	Pht=-01	Yld=090	Gpc=80	w(-1,-1,90,80)	GPC=0	1.22529	-4.2813	0.641081	0	60.7533	0.461433	90.34	80.258	5.4915	14.6755	631.336
BVC	Both	Mat=-01	Pht=-01	Yld=100	Gpc=01	w(-1,-1,100,1)	GPC=0	0.887249	-8.3903	0.425456	-2.18636e-16	50.0486	0.789498	93.9205	79.9045	4.2085	14.8065	660.182
BVC	Both	Mat=-01	Pht=-01	Yld=100	Gpc=10	w(-1,-1,100,10)	GPC=0	0.887249	-8.3903	0.425456	0	50.0486	0.89938	93.9205	79.9045	4.2085	14.8065	660.182
BVC	Both	Mat=-01	Pht=-01	Yld=100	Gpc=20	w(-1,-1,100,20)	GPC=0	0.887249	-8.3903	0.425456	2.18636e-16	50.0486	1.00699	93.9205	79.9045	4.2085	14.8065	660.182
BVC	Both	Mat=-01	Pht=-01	Yld=100	Gpc=30	w(-1,-1,100,30)	GPC=0	0.887249	-8.3903	0.425456	2.18636e-16	50.0486	1.05217	93.9205	79.9045	4.2085	14.8065	660.182
BVC	Both	Mat=-01	Pht=-01	Yld=100	Gpc=40	w(-1,-1,100,40)	GPC=0	0.887249	-8.3903	0.425456	2.18636e-16	50.0486	1.00624	93.9205	79.9045	4.2085	14.8065	660.182
BVC	Both	Mat=-01	Pht=-01	Yld=100	Gpc=50	w(-1,-1,100,50)	GPC=0	0.887249	-8.3903	0.425456	2.18636e-16	50.0486	0.898309	93.9205	79.9045	4.2085	14.8065	660.182
BVC	Both	Mat=-01	Pht=-01	Yld=100	Gpc=60	w(-1,-1,100,60)	GPC=0	0.887249	-8.3903	0.425456	2.18636e-16	50.0486	0.776612	93.9205	79.9045	4.2085	14.8065	660.182
BVC	Both	Mat=-01	Pht=-01	Yld=100	Gpc=70	w(-1,-1,100,70)	GPC=0	0.887249	-8.3903	0.425456	2.18636e-16	50.0486	0.667548	93.9205	79.9045	4.2085	14.8065	660.182
BVC	Both	Mat=-01	Pht=-01	Yld=100	Gpc=80	w(-1,-1,100,80)	GPC=0	0.887249	-8.3903	0.425456	4.37273e-16	50.0486	0.577608	93.9205	79.9045	4.2085	14.8065	660.182
BVC	Both	Mat=-01	Pht=-01	Yld=110	Gpc=01	w(-1,-1,110,1)	GPC=0	1.27622	-4.08717	0.643556	0	73.6021	0.745502	90.34	80.258	5.4915	14.6755	802.889
BVC	Both	Mat=-01	Pht=-01	Yld=110	Gpc=10	w(-1,-1,110,10)	GPC=0	1.27622	-4.08717	0.643556	2.97341e-16	73.6021	0.829502	90.34	80.258	5.4915	14.6755	802.889
BVC	Both	Mat=-01	Pht=-01	Yld=110	Gpc=20	w(-1,-1,110,20)	GPC=0	0.904458	-8.21195	0.427322	0	54.3129	0.983572	93.9205	79.9045	4.2085	14.8065	735.437
BVC	Both	Mat=-01	Pht=-01	Yld=110	Gpc=30	w(-1,-1,110,30)	GPC=0	1.27622	-4.08717	0.643556	-2.97341e-16	73.6021	0.935396	90.34	80.258	5.4915	14.6755	802.889
BVC	Both	Mat=-01	Pht=-01	Yld=110	Gpc=40	w(-1,-1,110,40)	GPC=0	0.904458	-8.21195	0.427322	2.01471e-16	54.3129	1.02748	93.9205	79.9045	4.2085	14.8065	735.437
BVC	Both	Mat=-01	Pht=-01	Yld=110	Gpc=50	w(-1,-1,110,50)	GPC=0	0.904458	-8.21195	0.427322	2.01471e-16	54.3129	0.946177	93.9205	79.9045	4.2085	14.8065	735.437
BVC	Both	Mat=-01	Pht=-01	Yld=110	Gpc=60	w(-1,-1,110,60)	GPC=0	1.27622	-4.08717	0.643556	2.97341e-16	73.6021	0.732705	90.34	80.258	5.4915	14.6755	802.889
BVC	Both	Mat=-01	Pht=-01	Yld=110	Gpc=70	w(-1,-1,110,70)	GPC=0	0.904458	-8.21195	0.427322	6.04412e-16	54.3129	0.728831	93.9205	79.9045	4.2085	14.8065	735.437
BVC	Both	Mat=-01	Pht=-01	Yld=110	Gpc=80	w(-1,-1,110,80)	GPC=0	0.904458	-8.21195	0.427322	4.02941e-16	54.3129	0.635215	93.9205	79.9045	4.2085	14.8065	735.437
BVC	Both	Mat=-01	Pht=-01	Yld=120	Gpc=01	w(-1,-1,120,1)	GPC=0	1.2953	-4.0127	0.644371	2.73418e-16	80.0419	0.744827	90.3315	80.855	5.4915	14.7	888.672
BVC	Both	Mat=-01	Pht=-01	Yld=120	Gpc=10	w(-1,-1,120,10)	GPC=0	1.2953	-4.0127	0.644371	2.73418e-16	80.0419	0.822308	90.3315	80.855	5.4915	14.7	888.672
BVC	Both	Mat=-01	Pht=-01	Yld=120	Gpc=20	w(-1,-1,120,20)	GPC=0	1.2953	-4.0127	0.644371	2.73418e-16	80.0419	0.895793	90.3315	80.855	5.4915	14.7	888.672
BVC	Both	Mat=-01	Pht=-01	Yld=120	Gpc=30	w(-1,-1,120,30)	GPC=0	1.2953	-4.0127	0.644371	0	80.0419	0.93366	90.3315	80.855	5.4915	14.7	888.672
BVC	Both	Mat=-01	Pht=-01	Yld=120	Gpc=40	w(-1,-1,120,40)	GPC=0	1.2953	-4.0127	0.644371	2.73418e-16	80.0419	0.919885	90.3315	80.855	5.4915	14.7	888.672
BVC	Both	Mat=-01	Pht=-01	Yld=120	Gpc=50	w(-1,-1,120,50)	GPC=0	1.2953	-4.0127	0.644371	0	80.0419	0.860652	90.3315	80.855	5.4915	14.7	888.672	Selected at yield = 1
BVC	Both	Mat=-01	Pht=-01	Yld=120	Gpc=60	w(-1,-1,120,60)	GPC=0	1.2953	-4.0127	0.644371	0	80.0419	0.778041	90.3315	80.855	5.4915	14.7	888.672
BVC	Both	Mat=-01	Pht=-01	Yld=120	Gpc=70	w(-1,-1,120,70)	GPC=0	1.2953	-4.0127	0.644371	-2.73418e-16	80.0419	0.692128	90.3315	80.855	5.4915	14.7	888.672	Selected at GPC = 1
BVC	Both	Mat=-01	Pht=-01	Yld=120	Gpc=80	w(-1,-1,120,80)	GPC=0	1.2953	-4.0127	0.644371	0	80.0419	0.613519	90.3315	80.855	5.4915	14.7	888.672
BVC	Both	Mat=-01	Pht=-01	Yld=130	Gpc=01	w(-1,-1,130,1)	GPC=0	1.31143	-3.949	0.64501	0	86.4889	0.744277	90.3315	80.855	5.4915	14.7	974.492
BVC	Both	Mat=-01	Pht=-01	Yld=130	Gpc=10	w(-1,-1,130,10)	GPC=0	1.31143	-3.949	0.64501	0	86.4889	0.816139	90.3315	80.855	5.4915	14.7	974.492
BVC	Both	Mat=-01	Pht=-01	Yld=130	Gpc=20	w(-1,-1,130,20)	GPC=0	1.31143	-3.949	0.64501	0	86.4889	0.886526	90.3315	80.855	5.4915	14.7	974.492
BVC	Both	Mat=-01	Pht=-01	Yld=130	Gpc=30	w(-1,-1,130,30)	GPC=0	1.31143	-3.949	0.64501	0	86.4889	0.929312	90.3315	80.855	5.4915	14.7	974.492
BVC	Both	Mat=-01	Pht=-01	Yld=130	Gpc=40	w(-1,-1,130,40)	GPC=0	1.31143	-3.949	0.64501	2.53037e-16	86.4889	0.929312	90.3315	80.855	5.4915	14.7	974.492
BVC	Both	Mat=-01	Pht=-01	Yld=130	Gpc=50	w(-1,-1,130,50)	GPC=0	1.31143	-3.949	0.64501	2.53037e-16	86.4889	0.886526	90.3315	80.855	5.4915	14.7	974.492	Selected at yield = 1
BVC	Both	Mat=-01	Pht=-01	Yld=130	Gpc=60	w(-1,-1,130,60)	GPC=0	1.31143	-3.949	0.64501	-2.53037e-16	86.4889	0.816139	90.3315	80.855	5.4915	14.7	974.492
BVC	Both	Mat=-01	Pht=-01	Yld=130	Gpc=70	w(-1,-1,130,70)	GPC=0	1.31143	-3.949	0.64501	-2.53037e-16	86.4889	0.736267	90.3315	80.855	5.4915	14.7	974.492	Selected at GPC = 1
BVC	Both	Mat=-01	Pht=-01	Yld=130	Gpc=80	w(-1,-1,130,80)	GPC=0	1.31143	-3.949	0.64501	-5.06074e-16	86.4889	0.659011	90.3315	80.855	5.4915	14.7	974.492
BVC	Both	Mat=-01	Pht=-01	Yld=140	Gpc=01	w(-1,-1,140,1)	GPC=0	1.32524	-3.89389	0.645522	2.35469e-16	92.9417	0.743822	90.3315	80.855	5.4915	14.7	1060.31
BVC	Both	Mat=-01	Pht=-01	Yld=140	Gpc=10	w(-1,-1,140,10)	GPC=0	1.32524	-3.89389	0.645522	0	92.9417	0.8108	90.3315	80.855	5.4915	14.7	1060.31
BVC	Both	Mat=-01	Pht=-01	Yld=140	Gpc=20	w(-1,-1,140,20)	GPC=0	1.32524	-3.89389	0.645522	0	92.9417	0.877993	90.3315	80.855	5.4915	14.7	1060.31
BVC	Both	Mat=-01	Pht=-01	Yld=140	Gpc=30	w(-1,-1,140,30)	GPC=0	1.32524	-3.89389	0.645522	0	92.9417	0.92354	90.3315	80.855	5.4915	14.7	1060.31
BVC	Both	Mat=-01	Pht=-01	Yld=140	Gpc=40	w(-1,-1,140,40)	GPC=0	1.32524	-3.89389	0.645522	-2.35469e-16	92.9417	0.93382	90.3315	80.855	5.4915	14.7	1060.31
BVC	Both	Mat=-01	Pht=-01	Yld=140	Gpc=50	w(-1,-1,140,50)	GPC=0	1.32524	-3.89389	0.645522	-2.35469e-16	92.9417	0.905278	90.3315	80.855	5.4915	14.7	1060.31
BVC	Both	Mat=-01	Pht=-01	Yld=140	Gpc=60	w(-1,-1,140,60)	GPC=0	1.32524	-3.89389	0.645522	0	92.9417	0.847339	90.3315	80.855	5.4915	14.7	1060.31
BVC	Both	Mat=-01	Pht=-01	Yld=140	Gpc=70	w(-1,-1,140,70)	GPC=0	1.32524	-3.89389	0.645522	0	92.9417	0.775103	90.3315	80.855	5.4915	14.7	1060.31
BVC	Both	Mat=-01	Pht=-01	Yld=140	Gpc=80	w(-1,-1,140,80)	GPC=0	1.32524	-3.89389	0.645522	0	92.9417	0.700946	90.3315	80.855	5.4915	14.7	1060.31
BVC	Both	Mat=-01	Pht=-01	Yld=150	Gpc=01	w(-1,-1,150,1)	GPC=0	1.3372	-3.84576	0.645936	2.20172e-16	99.399	0.74344	90.3315	80.855	5.4915	14.7	1146.13
BVC	Both	Mat=-01	Pht=-01	Yld=150	Gpc=10	w(-1,-1,150,10)	GPC=0	1.3372	-3.84576	0.645936	2.20172e-16	99.399	0.806138	90.3315	80.855	5.4915	14.7	1146.13
BVC	Both	Mat=-01	Pht=-01	Yld=150	Gpc=20	w(-1,-1,150,20)	GPC=0	1.3372	-3.84576	0.645936	4.40344e-16	99.399	0.870197	90.3315	80.855	5.4915	14.7	1146.13
BVC	Both	Mat=-01	Pht=-01	Yld=150	Gpc=30	w(-1,-1,150,30)	GPC=0	1.3372	-3.84576	0.645936	0	99.399	0.917074	90.3315	80.855	5.4915	14.7	1146.13
BVC	Both	Mat=-01	Pht=-01	Yld=150	Gpc=40	w(-1,-1,150,40)	GPC=0	1.3372	-3.84576	0.645936	4.40344e-16	99.399	0.934892	90.3315	80.855	5.4915	14.7	1146.13
BVC	Both	Mat=-01	Pht=-01	Yld=150	Gpc=50	w(-1,-1,150,50)	GPC=0	1.3372	-3.84576	0.645936	0	99.399	0.918279	90.3315	80.855	5.4915	14.7	1146.13	Selected at yield = 1
BVC	Both	Mat=-01	Pht=-01	Yld=150	Gpc=60	w(-1,-1,150,60)	GPC=0	1.3372	-3.84576	0.645936	-2.20172e-16	99.399	0.872259	90.3315	80.855	5.4915	14.7	1146.13
BVC	Both	Mat=-01	Pht=-01	Yld=150	Gpc=70	w(-1,-1,150,70)	GPC=0	1.3372	-3.84576	0.645936	2.20172e-16	99.399	0.808599	90.3315	80.855	5.4915	14.7	1146.13	Selected at GPC = 1
BVC	Both	Mat=-01	Pht=-01	Yld=150	Gpc=80	w(-1,-1,150,80)	GPC=0	1.3372	-3.84576	0.645936	0	99.399	0.738978	90.3315	80.855	5.4915	14.7	1146.13
BVC	Both	Mat=-01	Pht=-05	Yld=001	Gpc=01	w(-1,-5,1,1)	GPC=0	0.0095226	-8.91329	0.215012	2.13854e-16	44.772	0.853839	89.121	76.367	4.898	15.204	-260.089
BVC	Both	Mat=-01	Pht=-05	Yld=001	Gpc=10	w(-1,-5,1,10)	GPC=0	0.0095226	-8.91329	0.215012	7.63763e-17	44.772	0.95182	89.121	76.367	4.898	15.204	-260.089
BVC	Both	Mat=-01	Pht=-05	Yld=001	Gpc=20	w(-1,-5,1,20)	GPC=0	0.0095226	-8.91329	0.215012	3.05505e-17	44.772	0.908351	89.121	76.367	4.898	15.204	-260.089
BVC	Both	Mat=-01	Pht=-05	Yld=001	Gpc=30	w(-1,-5,1,30)	GPC=0	0.0095226	-8.91329	0.215012	-3.2078e-16	44.772	0.756513	89.121	76.367	4.898	15.204	-260.089
BVC	Both	Mat=-01	Pht=-05	Yld=001	Gpc=40	w(-1,-5,1,40)	GPC=0	0.0095226	-8.91329	0.215012	0	44.772	0.607481	89.121	76.367	4.898	15.204	-260.089
BVC	Both	Mat=-01	Pht=-05	Yld=001	Gpc=50	w(-1,-5,1,50)	GPC=0	0.0095226	-8.91329	0.215012	-5.95735e-16	44.772	0.493899	89.121	76.367	4.898	15.204	-260.089
BVC	Both	Mat=-01	Pht=-05	Yld=001	Gpc=60	w(-1,-5,1,60)	GPC=0	0.0095226	-8.91329	0.215012	-2.44404e-16	44.772	0.411129	89.121	76.367	4.898	15.204	-260.089
BVC	Both	Mat=-01	Pht=-05	Yld=001	Gpc=70	w(-1,-5,1,70)	GPC=0	0.0095226	-8.91329	0.215012	-8.24864e-16	44.772	0.350066	89.121	76.367	4.898	15.204	-260.089
BVC	Both	Mat=-01	Pht=-05	Yld=001	Gpc=80	w(-1,-5,1,80)	GPC=0	0.0095226	-8.91329	0.215012	-2.44404e-16	44.772	0.303851	89.121	76.367	4.898	15.204	-260.089
BVC	Both	Mat=-01	Pht=-05	Yld=010	Gpc=01	w(-1,-5,10,1)	GPC=0	0.195567	-8.87481	0.285241	-2.32665e-16	47.0309	0.828389	89.069	76.6625	4.975	15.26	-186.087
BVC	Both	Mat=-01	Pht=-05	Yld=010	Gpc=10	w(-1,-5,10,10)	GPC=0	0.195567	-8.87481	0.285241	0	47.0309	0.939358	89.069	76.6625	4.975	15.26	-186.087
BVC	Both	Mat=-01	Pht=-05	Yld=010	Gpc=20	w(-1,-5,10,20)	GPC=0	0.195567	-8.87481	0.285241	-2.90831e-17	47.0309	0.936143	89.069	76.6625	4.975	15.26	-186.087
BVC	Both	Mat=-01	Pht=-05	Yld=010	Gpc=30	w(-1,-5,10,30)	GPC=0	0.195567	-8.87481	0.285241	-3.48998e-16	47.0309	0.806875	89.069	76.6625	4.975	15.26	-186.087
BVC	Both	Mat=-01	Pht=-05	Yld=010	Gpc=40	w(-1,-5,10,40)	GPC=0	0.195567	-8.87481	0.285241	0	47.0309	0.656815	89.069	76.6625	4.975	15.26	-186.087
BVC	Both	Mat=-01	Pht=-05	Yld=010	Gpc=50	w(-1,-5,10,50)	GPC=0	0.195567	-8.87481	0.285241	-1.01791e-16	47.0309	0.535508	89.069	76.6625	4.975	15.26	-186.087
BVC	Both	Mat=-01	Pht=-05	Yld=010	Gpc=60	w(-1,-5,10,60)	GPC=0	0.195567	-8.87481	0.285241	-2.32665e-16	47.0309	0.445287	89.069	76.6625	4.975	15.26	-186.087
BVC	Both	Mat=-01	Pht=-05	Yld=010	Gpc=70	w(-1,-5,10,70)	GPC=0	0.195567	-8.87481	0.285241	0	47.0309	0.378324	89.069	76.6625	4.975	15.26	-186.087
BVC	Both	Mat=-01	Pht=-05	Yld=010	Gpc=80	w(-1,-5,10,80)	GPC=0	0.195567	-8.87481	0.285241	-6.25288e-16	47.0309	0.327611	89.069	76.6625	4.975	15.26	-186.087
BVC	Both	Mat=-01	Pht=-05	Yld=020	Gpc=01	w(-1,-5,20,1)	GPC=0	0.377193	-8.71621	0.350933	1.63409e-16	50.2225	0.804621	89.1515	76.959	5.048	15.2895	-102.962
BVC	Both	Mat=-01	Pht=-05	Yld=020	Gpc=10	w(-1,-5,20,10)	GPC=0	0.377193	-8.71621	0.350933	2.17879e-16	50.2225	0.920036	89.1515	76.959	5.048	15.2895	-102.962
BVC	Both	Mat=-01	Pht=-05	Yld=020	Gpc=20	w(-1,-5,20,20)	GPC=0	0.377193	-8.71621	0.350933	-2.17879e-16	50.2225	0.953333	89.1515	76.959	5.048	15.2895	-102.962
BVC	Both	Mat=-01	Pht=-05	Yld=020	Gpc=30	w(-1,-5,20,30)	GPC=0	0.377193	-8.71621	0.350933	-2.17879e-16	50.2225	0.857907	89.1515	76.959	5.048	15.2895	-102.962
BVC	Both	Mat=-01	Pht=-05	Yld=020	Gpc=40	w(-1,-5,20,40)	GPC=0	0.377193	-8.71621	0.350933	-3.26819e-16	50.2225	0.714916	89.1515	76.959	5.048	15.2895	-102.962
BVC	Both	Mat=-01	Pht=-05	Yld=020	Gpc=50	w(-1,-5,20,50)	GPC=0	0.377193	-8.71621	0.350933	-3.26819e-16	50.2225	0.587841	89.1515	76.959	5.048	15.2895	-102.962
BVC	Both	Mat=-01	Pht=-05	Yld=020	Gpc=60	w(-1,-5,20,60)	GPC=0	0.377193	-8.71621	0.350933	2.17879e-16	50.2225	0.489662	89.1515	76.959	5.048	15.2895	-102.962
BVC	Both	Mat=-01	Pht=-05	Yld=020	Gpc=70	w(-1,-5,20,70)	GPC=0	0.377193	-8.71621	0.350933	0	50.2225	0.415696	89.1515	76.959	5.048	15.2895	-102.962
BVC	Both	Mat=-01	Pht=-05	Yld=020	Gpc=80	w(-1,-5,20,80)	GPC=0	0.377193	-8.71621	0.350933	2.17879e-16	50.2225	0.35938	89.1515	76.959	5.048	15.2895	-102.962
BVC	Both	Mat=-01	Pht=-05	Yld=030	Gpc=01	w(-1,-5,30,1)	GPC=0	0.531206	-8.48223	0.404278	0	54.0083	0.785902	89.1515	76.959	5.048	15.2895	-19.5016
BVC	Both	Mat=-01	Pht=-05	Yld=030	Gpc=10	w(-1,-5,30,10)	GPC=0	0.531206	-8.48223	0.404278	2.02607e-16	54.0083	0.899277	89.1515	76.959	5.048	15.2895	-19.5016
BVC	Both	Mat=-01	Pht=-05	Yld=030	Gpc=20	w(-1,-5,30,20)	GPC=0	0.531206	-8.48223	0.404278	0	54.0083	0.957645	89.1515	76.959	5.048	15.2895	-19.5016
BVC	Both	Mat=-01	Pht=-05	Yld=030	Gpc=30	w(-1,-5,30,30)	GPC=0	0.531206	-8.48223	0.404278	2.02607e-16	54.0083	0.898817	89.1515	76.959	5.048	15.2895	-19.5016
BVC	Both	Mat=-01	Pht=-05	Yld=030	Gpc=40	w(-1,-5,30,40)	GPC=0	0.531206	-8.48223	0.404278	-2.02607e-16	54.0083	0.771798	89.1515	76.959	5.048	15.2895	-19.5016
BVC	Both	Mat=-01	Pht=-05	Yld=030	Gpc=50	w(-1,-5,30,50)	GPC=0	0.531206	-8.48223	0.404278	-1.51955e-16	54.0083	0.643719	89.1515	76.959	5.048	15.2895	-19.5016
BVC	Both	Mat=-01	Pht=-05	Yld=030	Gpc=60	w(-1,-5,30,60)	GPC=0	0.531206	-8.48223	0.404278	-6.07821e-16	54.0083	0.53906	89.1515	76.959	5.048	15.2895	-19.5016
BVC	Both	Mat=-01	Pht=-05	Yld=030	Gpc=70	w(-1,-5,30,70)	GPC=0	0.531206	-8.48223	0.404278	-7.59776e-16	54.0083	0.458208	89.1515	76.959	5.048	15.2895	-19.5016
BVC	Both	Mat=-01	Pht=-05	Yld=030	Gpc=80	w(-1,-5,30,80)	GPC=0	0.531206	-8.48223	0.404278	2.02607e-16	54.0083	0.395964	89.1515	76.959	5.048	15.2895	-19.5016
BVC	Both	Mat=-01	Pht=-05	Yld=040	Gpc=01	w(-1,-5,40,1)	GPC=0	0.659582	-8.21093	0.446934	2.81671e-16	58.2724	0.771613	89.2825	76.9765	5.073	15.258	64.0006
BVC	Both	Mat=-01	Pht=-05	Yld=040	Gpc=10	w(-1,-5,40,10)	GPC=0	0.659582	-8.21093	0.446934	2.81671e-16	58.2724	0.879691	89.2825	76.9765	5.073	15.258	64.0006
BVC	Both	Mat=-01	Pht=-05	Yld=040	Gpc=20	w(-1,-5,40,20)	GPC=0	0.659582	-8.21093	0.446934	3.75562e-16	58.2724	0.952862	89.2825	76.9765	5.073	15.258	64.0006
BVC	Both	Mat=-01	Pht=-05	Yld=040	Gpc=30	w(-1,-5,40,30)	GPC=0	0.659582	-8.21093	0.446934	9.38904e-17	58.2724	0.927397	89.2825	76.9765	5.073	15.258	64.0006
BVC	Both	Mat=-01	Pht=-05	Yld=040	Gpc=40	w(-1,-5,40,40)	GPC=0	0.659582	-8.21093	0.446934	1.87781e-16	58.2724	0.823059	89.2825	76.9765	5.073	15.258	64.0006
BVC	Both	Mat=-01	Pht=-05	Yld=040	Gpc=50	w(-1,-5,40,50)	GPC=0	0.659582	-8.21093	0.446934	-3.75562e-16	58.2724	0.69983	89.2825	76.9765	5.073	15.258	64.0006
BVC	Both	Mat=-01	Pht=-05	Yld=040	Gpc=60	w(-1,-5,40,60)	GPC=0	0.659582	-8.21093	0.446934	-4.69452e-16	58.2724	0.591354	89.2825	76.9765	5.073	15.258	64.0006
BVC	Both	Mat=-01	Pht=-05	Yld=040	Gpc=70	w(-1,-5,40,70)	GPC=0	0.659582	-8.21093	0.446934	3.75562e-16	58.2724	0.504462	89.2825	76.9765	5.073	15.258	64.0006
BVC	Both	Mat=-01	Pht=-05	Yld=040	Gpc=80	w(-1,-5,40,80)	GPC=0	0.659582	-8.21093	0.446934	0	58.2724	0.436367	89.2825	76.9765	5.073	15.258	64.0006
BVC	Both	Mat=-01	Pht=-05	Yld=050	Gpc=01	w(-1,-5,50,1)	GPC=0	0.765782	-7.9283	0.480842	0	62.9178	0.760868	89.6165	77.117	5.1055	15.2405	147.723
BVC	Both	Mat=-01	Pht=-05	Yld=050	Gpc=10	w(-1,-5,50,10)	GPC=0	0.765782	-7.9283	0.480842	-1.73917e-16	62.9178	0.862367	89.6165	77.117	5.1055	15.2405	147.723
BVC	Both	Mat=-01	Pht=-05	Yld=050	Gpc=20	w(-1,-5,50,20)	GPC=0	0.765782	-7.9283	0.480842	0	62.9178	0.94283	89.6165	77.117	5.1055	15.2405	147.723
BVC	Both	Mat=-01	Pht=-05	Yld=050	Gpc=30	w(-1,-5,50,30)	GPC=0	0.765782	-7.9283	0.480842	1.73917e-16	62.9178	0.944268	89.6165	77.117	5.1055	15.2405	147.723
BVC	Both	Mat=-01	Pht=-05	Yld=050	Gpc=40	w(-1,-5,50,40)	GPC=0	0.765782	-7.9283	0.480842	-8.69583e-17	62.9178	0.865679	89.6165	77.117	5.1055	15.2405	147.723
BVC	Both	Mat=-01	Pht=-05	Yld=050	Gpc=50	w(-1,-5,50,50)	GPC=0	0.765782	-7.9283	0.480842	-3.47833e-16	62.9178	0.753014	89.6165	77.117	5.1055	15.2405	147.723
BVC	Both	Mat=-01	Pht=-05	Yld=050	Gpc=60	w(-1,-5,50,60)	GPC=0	0.765782	-7.9283	0.480842	5.2175e-16	62.9178	0.644285	89.6165	77.117	5.1055	15.2405	147.723
BVC	Both	Mat=-01	Pht=-05	Yld=050	Gpc=70	w(-1,-5,50,70)	GPC=0	0.765782	-7.9283	0.480842	-2.60875e-16	62.9178	0.552933	89.6165	77.117	5.1055	15.2405	147.723
BVC	Both	Mat=-01	Pht=-05	Yld=050	Gpc=80	w(-1,-5,50,80)	GPC=0	0.765782	-7.9283	0.480842	1.73917e-16	62.9178	0.479525	89.6165	77.117	5.1055	15.2405	147.723
BVC	Both	Mat=-01	Pht=-05	Yld=060	Gpc=01	w(-1,-5,60,1)	GPC=0	0.853551	-7.65022	0.50781	0	67.8662	0.75283	89.628	77.753	5.136	15.3025	231.747
BVC	Both	Mat=-01	Pht=-05	Yld=060	Gpc=10	w(-1,-5,60,10)	GPC=0	0.853551	-7.65022	0.50781	1.61236e-16	67.8662	0.847521	89.628	77.753	5.136	15.3025	231.747
BVC	Both	Mat=-01	Pht=-05	Yld=060	Gpc=20	w(-1,-5,60,20)	GPC=0	0.853551	-7.65022	0.50781	0	67.8662	0.930406	89.628	77.753	5.136	15.3025	231.747
BVC	Both	Mat=-01	Pht=-05	Yld=060	Gpc=30	w(-1,-5,60,30)	GPC=0	0.853551	-7.65022	0.50781	0	67.8662	0.951689	89.628	77.753	5.136	15.3025	231.747
BVC	Both	Mat=-01	Pht=-05	Yld=060	Gpc=40	w(-1,-5,60,40)	GPC=0	0.853551	-7.65022	0.50781	-3.22471e-16	67.8662	0.898418	89.628	77.753	5.136	15.3025	231.747
BVC	Both	Mat=-01	Pht=-05	Yld=060	Gpc=50	w(-1,-5,60,50)	GPC=0	0.853551	-7.65022	0.50781	-3.22471e-16	67.8662	0.800733	89.628	77.753	5.136	15.3025	231.747
BVC	Both	Mat=-01	Pht=-05	Yld=060	Gpc=60	w(-1,-5,60,60)	GPC=0	0.853551	-7.65022	0.50781	-3.22471e-16	67.8662	0.695676	89.628	77.753	5.136	15.3025	231.747
BVC	Both	Mat=-01	Pht=-05	Yld=060	Gpc=70	w(-1,-5,60,70)	GPC=0	0.853551	-7.65022	0.50781	-1.61236e-16	67.8662	0.60206	89.628	77.753	5.136	15.3025	231.747
BVC	Both	Mat=-01	Pht=-05	Yld=060	Gpc=80	w(-1,-5,60,80)	GPC=0	0.853551	-7.65022	0.50781	-4.83707e-16	67.8662	0.524342	89.628	77.753	5.136	15.3025	231.747
BVC	Both	Mat=-01	Pht=-05	Yld=070	Gpc=01	w(-1,-5,70,1)	GPC=0	0.92632	-7.38545	0.529358	0	73.056	0.746817	89.869	77.9765	5.2145	15.188	316.381
BVC	Both	Mat=-01	Pht=-05	Yld=070	Gpc=10	w(-1,-5,70,10)	GPC=0	0.92632	-7.38545	0.529358	1.49782e-16	73.056	0.834979	89.869	77.9765	5.2145	15.188	316.381
BVC	Both	Mat=-01	Pht=-05	Yld=070	Gpc=20	w(-1,-5,70,20)	GPC=0	0.92632	-7.38545	0.529358	1.49782e-16	73.056	0.917369	89.869	77.9765	5.2145	15.188	316.381
BVC	Both	Mat=-01	Pht=-05	Yld=070	Gpc=30	w(-1,-5,70,30)	GPC=0	0.92632	-7.38545	0.529358	0	73.056	0.952329	89.869	77.9765	5.2145	15.188	316.381
BVC	Both	Mat=-01	Pht=-05	Yld=070	Gpc=40	w(-1,-5,70,40)	GPC=0	0.92632	-7.38545	0.529358	0	73.056	0.921586	89.869	77.9765	5.2145	15.188	316.381
BVC	Both	Mat=-01	Pht=-05	Yld=070	Gpc=50	w(-1,-5,70,50)	GPC=0	0.92632	-7.38545	0.529358	1.49782e-16	73.056	0.841367	89.869	77.9765	5.2145	15.188	316.381
BVC	Both	Mat=-01	Pht=-05	Yld=070	Gpc=60	w(-1,-5,70,60)	GPC=0	0.92632	-7.38545	0.529358	-2.99563e-16	73.056	0.743647	89.869	77.9765	5.2145	15.188	316.381
BVC	Both	Mat=-01	Pht=-05	Yld=070	Gpc=70	w(-1,-5,70,70)	GPC=0	0.92632	-7.38545	0.529358	0	73.056	0.650343	89.869	77.9765	5.2145	15.188	316.381
BVC	Both	Mat=-01	Pht=-05	Yld=070	Gpc=80	w(-1,-5,70,80)	GPC=0	0.92632	-7.38545	0.529358	0	73.056	0.569721	89.869	77.9765	5.2145	15.188	316.381
BVC	Both	Mat=-01	Pht=-05	Yld=080	Gpc=01	w(-1,-5,80,1)	GPC=0	0.986994	-7.13815	0.546695	0	78.4393	0.742308	89.7135	78.3885	5.2145	15.2515	401.071
BVC	Both	Mat=-01	Pht=-05	Yld=080	Gpc=10	w(-1,-5,80,10)	GPC=0	0.986994	-7.13815	0.546695	0	78.4393	0.824428	89.7135	78.3885	5.2145	15.2515	401.071
BVC	Both	Mat=-01	Pht=-05	Yld=080	Gpc=20	w(-1,-5,80,20)	GPC=0	0.986994	-7.13815	0.546695	0	78.4393	0.904697	89.7135	78.3885	5.2145	15.2515	401.071
BVC	Both	Mat=-01	Pht=-05	Yld=080	Gpc=30	w(-1,-5,80,30)	GPC=0	0.986994	-7.13815	0.546695	0	78.4393	0.948538	89.7135	78.3885	5.2145	15.2515	401.071
BVC	Both	Mat=-01	Pht=-05	Yld=080	Gpc=40	w(-1,-5,80,40)	GPC=0	0.986994	-7.13815	0.546695	1.39502e-16	78.4393	0.936469	89.7135	78.3885	5.2145	15.2515	401.071
BVC	Both	Mat=-01	Pht=-05	Yld=080	Gpc=50	w(-1,-5,80,50)	GPC=0	0.986994	-7.13815	0.546695	1.39502e-16	78.4393	0.874277	89.7135	78.3885	5.2145	15.2515	401.071
BVC	Both	Mat=-01	Pht=-05	Yld=080	Gpc=60	w(-1,-5,80,60)	GPC=0	0.986994	-7.13815	0.546695	-2.79004e-16	78.4393	0.78678	89.7135	78.3885	5.2145	15.2515	401.071
BVC	Both	Mat=-01	Pht=-05	Yld=080	Gpc=70	w(-1,-5,80,70)	GPC=0	0.986994	-7.13815	0.546695	0	78.4393	0.696432	89.7135	78.3885	5.2145	15.2515	401.071
BVC	Both	Mat=-01	Pht=-05	Yld=080	Gpc=80	w(-1,-5,80,80)	GPC=0	0.986994	-7.13815	0.546695	-4.18506e-16	78.4393	0.614611	89.7135	78.3885	5.2145	15.2515	401.071
BVC	Both	Mat=-01	Pht=-05	Yld=090	Gpc=01	w(-1,-5,90,1)	GPC=0	1.03794	-6.90973	0.560759	1.303e-16	83.979	0.738915	89.5895	78.6525	5.2295	15.255	485.928
BVC	Both	Mat=-01	Pht=-05	Yld=090	Gpc=10	w(-1,-5,90,10)	GPC=0	1.03794	-6.90973	0.560759	2.606e-16	83.979	0.815542	89.5895	78.6525	5.2295	15.255	485.928
BVC	Both	Mat=-01	Pht=-05	Yld=090	Gpc=20	w(-1,-5,90,20)	GPC=0	1.03794	-6.90973	0.560759	5.21199e-16	83.979	0.892857	89.5895	78.6525	5.2295	15.255	485.928
BVC	Both	Mat=-01	Pht=-05	Yld=090	Gpc=30	w(-1,-5,90,30)	GPC=0	1.03794	-6.90973	0.560759	1.303e-16	83.979	0.942097	89.5895	78.6525	5.2295	15.255	485.928
BVC	Both	Mat=-01	Pht=-05	Yld=090	Gpc=40	w(-1,-5,90,40)	GPC=0	1.03794	-6.90973	0.560759	-1.303e-16	83.979	0.944737	89.5895	78.6525	5.2295	15.255	485.928
BVC	Both	Mat=-01	Pht=-05	Yld=090	Gpc=50	w(-1,-5,90,50)	GPC=0	1.03794	-6.90973	0.560759	1.303e-16	83.979	0.899648	89.5895	78.6525	5.2295	15.255	485.928
BVC	Both	Mat=-01	Pht=-05	Yld=090	Gpc=60	w(-1,-5,90,60)	GPC=0	1.03794	-6.90973	0.560759	0	83.979	0.824207	89.5895	78.6525	5.2295	15.255	485.928
BVC	Both	Mat=-01	Pht=-05	Yld=090	Gpc=70	w(-1,-5,90,70)	GPC=0	1.03794	-6.90973	0.560759	-3.90899e-16	83.979	0.739219	89.5895	78.6525	5.2295	15.255	485.928
BVC	Both	Mat=-01	Pht=-05	Yld=090	Gpc=80	w(-1,-5,90,80)	GPC=0	1.03794	-6.90973	0.560759	5.21199e-16	83.979	0.658042	89.5895	78.6525	5.2295	15.255	485.928
BVC	Both	Mat=-01	Pht=-05	Yld=100	Gpc=01	w(-1,-5,100,1)	GPC=0	1.08104	-6.70005	0.572268	2.44126e-16	89.646	0.736353	89.678	78.63	5.2595	15.1795	570.862
BVC	Both	Mat=-01	Pht=-05	Yld=100	Gpc=10	w(-1,-5,100,10)	GPC=0	1.08104	-6.70005	0.572268	0	89.646	0.808029	89.678	78.63	5.2595	15.1795	570.862
BVC	Both	Mat=-01	Pht=-05	Yld=100	Gpc=20	w(-1,-5,100,20)	GPC=0	1.08104	-6.70005	0.572268	2.44126e-16	89.646	0.882026	89.678	78.63	5.2595	15.1795	570.862
BVC	Both	Mat=-01	Pht=-05	Yld=100	Gpc=30	w(-1,-5,100,30)	GPC=0	1.08104	-6.70005	0.572268	0	89.646	0.934238	89.678	78.63	5.2595	15.1795	570.862
BVC	Both	Mat=-01	Pht=-05	Yld=100	Gpc=40	w(-1,-5,100,40)	GPC=0	1.08104	-6.70005	0.572268	-1.22063e-16	89.646	0.948038	89.678	78.63	5.2595	15.1795	570.862
BVC	Both	Mat=-01	Pht=-05	Yld=100	Gpc=50	w(-1,-5,100,50)	GPC=0	1.08104	-6.70005	0.572268	1.22063e-16	89.646	0.918221	89.678	78.63	5.2595	15.1795	570.862
BVC	Both	Mat=-01	Pht=-05	Yld=100	Gpc=60	w(-1,-5,100,60)	GPC=0	1.08104	-6.70005	0.572268	-1.22063e-16	89.646	0.855597	89.678	78.63	5.2595	15.1795	570.862
BVC	Both	Mat=-01	Pht=-05	Yld=100	Gpc=70	w(-1,-5,100,70)	GPC=0	1.08104	-6.70005	0.572268	-1.22063e-16	89.646	0.777896	89.678	78.63	5.2595	15.1795	570.862
BVC	Both	Mat=-01	Pht=-05	Yld=100	Gpc=80	w(-1,-5,100,80)	GPC=0	1.08104	-6.70005	0.572268	-1.22063e-16	89.646	0.699176	89.678	78.63	5.2595	15.1795	570.862
BVC	Both	Mat=-01	Pht=-05	Yld=110	Gpc=01	w(-1,-5,110,1)	GPC=0	1.11779	-6.50815	0.58177	2.29359e-16	95.4177	0.734414	89.998	78.4935	5.292	15.0835	655.921
BVC	Both	Mat=-01	Pht=-05	Yld=110	Gpc=10	w(-1,-5,110,10)	GPC=0	1.11779	-6.50815	0.58177	-4.58718e-16	95.4177	0.80164	89.998	78.4935	5.292	15.0835	655.921
BVC	Both	Mat=-01	Pht=-05	Yld=110	Gpc=20	w(-1,-5,110,20)	GPC=0	1.11779	-6.50815	0.58177	2.29359e-16	95.4177	0.872229	89.998	78.4935	5.292	15.0835	655.921
BVC	Both	Mat=-01	Pht=-05	Yld=110	Gpc=30	w(-1,-5,110,30)	GPC=0	1.11779	-6.50815	0.58177	4.58718e-16	95.4177	0.925766	89.998	78.4935	5.292	15.0835	655.921
BVC	Both	Mat=-01	Pht=-05	Yld=110	Gpc=40	w(-1,-5,110,40)	GPC=0	1.11779	-6.50815	0.58177	0	95.4177	0.947786	89.998	78.4935	5.292	15.0835	655.921
BVC	Both	Mat=-01	Pht=-05	Yld=110	Gpc=50	w(-1,-5,110,50)	GPC=0	1.11779	-6.50815	0.58177	0	95.4177	0.931018	89.998	78.4935	5.292	15.0835	655.921
BVC	Both	Mat=-01	Pht=-05	Yld=110	Gpc=60	w(-1,-5,110,60)	GPC=0	1.11779	-6.50815	0.58177	-4.58718e-16	95.4177	0.881072	89.998	78.4935	5.292	15.0835	655.921
BVC	Both	Mat=-01	Pht=-05	Yld=110	Gpc=70	w(-1,-5,110,70)	GPC=0	1.11779	-6.50815	0.58177	-4.58718e-16	95.4177	0.81198	89.998	78.4935	5.292	15.0835	655.921
BVC	Both	Mat=-01	Pht=-05	Yld=110	Gpc=80	w(-1,-5,110,80)	GPC=0	1.11779	-6.50815	0.58177	0	95.4177	0.737343	89.998	78.4935	5.292	15.0835	655.921
BVC	Both	Mat=-01	Pht=-05	Yld=120	Gpc=01	w(-1,-5,120,1)	GPC=0	1.14936	-6.33272	0.589683	2.16091e-16	101.276	0.732946	90.055	79.021	5.305	15.118	741.122
BVC	Both	Mat=-01	Pht=-05	Yld=120	Gpc=10	w(-1,-5,120,10)	GPC=0	1.14936	-6.33272	0.589683	2.16091e-16	101.276	0.796173	90.055	79.021	5.305	15.118	741.122
BVC	Both	Mat=-01	Pht=-05	Yld=120	Gpc=20	w(-1,-5,120,20)	GPC=0	1.14936	-6.33272	0.589683	4.32183e-16	101.276	0.863414	90.055	79.021	5.305	15.118	741.122
BVC	Both	Mat=-01	Pht=-05	Yld=120	Gpc=30	w(-1,-5,120,30)	GPC=0	1.14936	-6.33272	0.589683	-2.16091e-16	101.276	0.917183	90.055	79.021	5.305	15.118	741.122
BVC	Both	Mat=-01	Pht=-05	Yld=120	Gpc=40	w(-1,-5,120,40)	GPC=0	1.14936	-6.33272	0.589683	2.16091e-16	101.276	0.945098	90.055	79.021	5.305	15.118	741.122
BVC	Both	Mat=-01	Pht=-05	Yld=120	Gpc=50	w(-1,-5,120,50)	GPC=0	1.14936	-6.33272	0.589683	0	101.276	0.939122	90.055	79.021	5.305	15.118	741.122
BVC	Both	Mat=-01	Pht=-05	Yld=120	Gpc=60	w(-1,-5,120,60)	GPC=0	1.14936	-6.33272	0.589683	-2.16091e-16	101.276	0.901074	90.055	79.021	5.305	15.118	741.122
BVC	Both	Mat=-01	Pht=-05	Yld=120	Gpc=70	w(-1,-5,120,70)	GPC=0	1.14936	-6.33272	0.589683	0	101.276	0.841293	90.055	79.021	5.305	15.118	741.122
BVC	Both	Mat=-01	Pht=-05	Yld=120	Gpc=80	w(-1,-5,120,80)	GPC=0	1.14936	-6.33272	0.589683	0	101.276	0.772065	90.055	79.021	5.305	15.118	741.122
BVC	Both	Mat=-01	Pht=-05	Yld=130	Gpc=01	w(-1,-5,130,1)	GPC=0	1.17668	-6.17229	0.596326	4.08273e-16	107.207	0.731836	90.055	79.021	5.305	15.118	826.371
BVC	Both	Mat=-01	Pht=-05	Yld=130	Gpc=10	w(-1,-5,130,10)	GPC=0	1.17668	-6.17229	0.596326	4.08273e-16	107.207	0.791463	90.055	79.021	5.305	15.118	826.371
BVC	Both	Mat=-01	Pht=-05	Yld=130	Gpc=20	w(-1,-5,130,20)	GPC=0	1.17668	-6.17229	0.596326	0	107.207	0.855497	90.055	79.021	5.305	15.118	826.371
BVC	Both	Mat=-01	Pht=-05	Yld=130	Gpc=30	w(-1,-5,130,30)	GPC=0	1.17668	-6.17229	0.596326	2.04137e-16	107.207	0.908784	90.055	79.021	5.305	15.118	826.371
BVC	Both	Mat=-01	Pht=-05	Yld=130	Gpc=40	w(-1,-5,130,40)	GPC=0	1.17668	-6.17229	0.596326	4.08273e-16	107.207	0.940813	90.055	79.021	5.305	15.118	826.371
BVC	Both	Mat=-01	Pht=-05	Yld=130	Gpc=50	w(-1,-5,130,50)	GPC=0	1.17668	-6.17229	0.596326	2.04137e-16	107.207	0.943548	90.055	79.021	5.305	15.118	826.371
BVC	Both	Mat=-01	Pht=-05	Yld=130	Gpc=60	w(-1,-5,130,60)	GPC=0	1.17668	-6.17229	0.596326	2.04137e-16	107.207	0.916237	90.055	79.021	5.305	15.118	826.371
BVC	Both	Mat=-01	Pht=-05	Yld=130	Gpc=70	w(-1,-5,130,70)	GPC=0	1.17668	-6.17229	0.596326	0	107.207	0.865919	90.055	79.021	5.305	15.118	826.371
BVC	Both	Mat=-01	Pht=-05	Yld=130	Gpc=80	w(-1,-5,130,80)	GPC=0	1.17668	-6.17229	0.596326	-2.04137e-16	107.207	0.803059	90.055	79.021	5.305	15.118	826.371
BVC	Both	Mat=-01	Pht=-05	Yld=140	Gpc=01	w(-1,-5,140,1)	GPC=0	1.20049	-6.02542	0.601947	5.79992e-16	113.199	0.731	90.055	79.021	5.305	15.118	911.62
BVC	Both	Mat=-01	Pht=-05	Yld=140	Gpc=10	w(-1,-5,140,10)	GPC=0	1.20049	-6.02542	0.601947	0	113.199	0.787379	90.055	79.021	5.305	15.118	911.62
BVC	Both	Mat=-01	Pht=-05	Yld=140	Gpc=20	w(-1,-5,140,20)	GPC=0	1.20049	-6.02542	0.601947	0	113.199	0.848384	90.055	79.021	5.305	15.118	911.62
BVC	Both	Mat=-01	Pht=-05	Yld=140	Gpc=30	w(-1,-5,140,30)	GPC=0	1.20049	-6.02542	0.601947	1.93331e-16	113.199	0.900738	90.055	79.021	5.305	15.118	911.62
BVC	Both	Mat=-01	Pht=-05	Yld=140	Gpc=40	w(-1,-5,140,40)	GPC=0	1.20049	-6.02542	0.601947	3.86662e-16	113.199	0.935538	90.055	79.021	5.305	15.118	911.62
BVC	Both	Mat=-01	Pht=-05	Yld=140	Gpc=50	w(-1,-5,140,50)	GPC=0	1.20049	-6.02542	0.601947	0	113.199	0.945171	90.055	79.021	5.305	15.118	911.62
BVC	Both	Mat=-01	Pht=-05	Yld=140	Gpc=60	w(-1,-5,140,60)	GPC=0	1.20049	-6.02542	0.601947	0	113.199	0.927265	90.055	79.021	5.305	15.118	911.62
BVC	Both	Mat=-01	Pht=-05	Yld=140	Gpc=70	w(-1,-5,140,70)	GPC=0	1.20049	-6.02542	0.601947	0	113.199	0.886135	90.055	79.021	5.305	15.118	911.62
BVC	Both	Mat=-01	Pht=-05	Yld=140	Gpc=80	w(-1,-5,140,80)	GPC=0	1.20049	-6.02542	0.601947	-1.93331e-16	113.199	0.830227	90.055	79.021	5.305	15.118	911.62
BVC	Both	Mat=-01	Pht=-05	Yld=150	Gpc=01	w(-1,-5,150,1)	GPC=0	1.22137	-5.89076	0.606739	3.67063e-16	119.243	0.730375	90.055	79.021	5.305	15.118	996.87
BVC	Both	Mat=-01	Pht=-05	Yld=150	Gpc=10	w(-1,-5,150,10)	GPC=0	1.22137	-5.89076	0.606739	0	119.243	0.783815	90.055	79.021	5.305	15.118	996.87
BVC	Both	Mat=-01	Pht=-05	Yld=150	Gpc=20	w(-1,-5,150,20)	GPC=0	1.22137	-5.89076	0.606739	0	119.243	0.841985	90.055	79.021	5.305	15.118	996.87
BVC	Both	Mat=-01	Pht=-05	Yld=150	Gpc=30	w(-1,-5,150,30)	GPC=0	1.22137	-5.89076	0.606739	0	119.243	0.893126	90.055	79.021	5.305	15.118	996.87
BVC	Both	Mat=-01	Pht=-05	Yld=150	Gpc=40	w(-1,-5,150,40)	GPC=0	1.22137	-5.89076	0.606739	0	119.243	0.929701	90.055	79.021	5.305	15.118	996.87
BVC	Both	Mat=-01	Pht=-05	Yld=150	Gpc=50	w(-1,-5,150,50)	GPC=0	1.22137	-5.89076	0.606739	0	119.243	0.944713	90.055	79.021	5.305	15.118	996.87
BVC	Both	Mat=-01	Pht=-05	Yld=150	Gpc=60	w(-1,-5,150,60)	GPC=0	1.22137	-5.89076	0.606739	3.67063e-16	119.243	0.934861	90.055	79.021	5.305	15.118	996.87
BVC	Both	Mat=-01	Pht=-05	Yld=150	Gpc=70	w(-1,-5,150,70)	GPC=0	1.22137	-5.89076	0.606739	3.67063e-16	119.243	0.902341	90.055	79.021	5.305	15.118	996.87
BVC	Both	Mat=-01	Pht=-05	Yld=150	Gpc=80	w(-1,-5,150,80)	GPC=0	1.22137	-5.89076	0.606739	3.67063e-16	119.243	0.853626	90.055	79.021	5.305	15.118	996.87
BVC	Both	Mat=-01	Pht=-10	Yld=001	Gpc=01	w(-1,-10,1,1)	GPC=0	0.182637	-8.93828	0.221497	-2.44738e-16	89.4217	0.836722	89.121	76.367	4.898	15.204	-426.279
BVC	Both	Mat=-01	Pht=-10	Yld=001	Gpc=10	w(-1,-10,1,10)	GPC=0	0.182637	-8.93828	0.221497	1.45313e-16	89.4217	0.901607	89.121	76.367	4.898	15.204	-426.279
BVC	Both	Mat=-01	Pht=-10	Yld=001	Gpc=20	w(-1,-10,1,20)	GPC=0	0.182637	-8.93828	0.221497	-6.88326e-17	89.4217	0.948437	89.121	76.367	4.898	15.204	-426.279
BVC	Both	Mat=-01	Pht=-10	Yld=001	Gpc=30	w(-1,-10,1,30)	GPC=0	0.182637	-8.93828	0.221497	-5.35365e-17	89.4217	0.953338	89.121	76.367	4.898	15.204	-426.279
BVC	Both	Mat=-01	Pht=-10	Yld=001	Gpc=40	w(-1,-10,1,40)	GPC=0	0.182637	-8.93828	0.221497	-1.9885e-16	89.4217	0.914409	89.121	76.367	4.898	15.204	-426.279
BVC	Both	Mat=-01	Pht=-10	Yld=001	Gpc=50	w(-1,-10,1,50)	GPC=0	0.182637	-8.93828	0.221497	-2.06498e-16	89.4217	0.845539	89.121	76.367	4.898	15.204	-426.279
BVC	Both	Mat=-01	Pht=-10	Yld=001	Gpc=60	w(-1,-10,1,60)	GPC=0	0.182637	-8.93828	0.221497	-2.44738e-16	89.4217	0.765039	89.121	76.367	4.898	15.204	-426.279
BVC	Both	Mat=-01	Pht=-10	Yld=001	Gpc=70	w(-1,-10,1,70)	GPC=0	0.182637	-8.93828	0.221497	0	89.4217	0.685915	89.121	76.367	4.898	15.204	-426.279
BVC	Both	Mat=-01	Pht=-10	Yld=001	Gpc=80	w(-1,-10,1,80)	GPC=0	0.182637	-8.93828	0.221497	2.44738e-16	89.4217	0.614353	89.121	76.367	4.898	15.204	-426.279
BVC	Both	Mat=-01	Pht=-10	Yld=010	Gpc=01	w(-1,-10,10,1)	GPC=0	0.274111	-8.92774	0.257647	4.4807e-17	91.5798	0.823801	89.121	76.367	4.898	15.204	-352.478
BVC	Both	Mat=-01	Pht=-10	Yld=010	Gpc=10	w(-1,-10,10,10)	GPC=0	0.274111	-8.92774	0.257647	2.46439e-16	91.5798	0.889763	89.121	76.367	4.898	15.204	-352.478
BVC	Both	Mat=-01	Pht=-10	Yld=010	Gpc=20	w(-1,-10,10,20)	GPC=0	0.274111	-8.92774	0.257647	2.24035e-17	91.5798	0.942232	89.121	76.367	4.898	15.204	-352.478
BVC	Both	Mat=-01	Pht=-10	Yld=010	Gpc=30	w(-1,-10,10,30)	GPC=0	0.274111	-8.92774	0.257647	1.34421e-16	91.5798	0.957075	89.121	76.367	4.898	15.204	-352.478
BVC	Both	Mat=-01	Pht=-10	Yld=010	Gpc=40	w(-1,-10,10,40)	GPC=0	0.274111	-8.92774	0.257647	-1.49357e-17	91.5798	0.928822	89.121	76.367	4.898	15.204	-352.478
BVC	Both	Mat=-01	Pht=-10	Yld=010	Gpc=50	w(-1,-10,10,50)	GPC=0	0.274111	-8.92774	0.257647	0	91.5798	0.867548	89.121	76.367	4.898	15.204	-352.478
BVC	Both	Mat=-01	Pht=-10	Yld=010	Gpc=60	w(-1,-10,10,60)	GPC=0	0.274111	-8.92774	0.257647	0	91.5798	0.790503	89.121	76.367	4.898	15.204	-352.478
BVC	Both	Mat=-01	Pht=-10	Yld=010	Gpc=70	w(-1,-10,10,70)	GPC=0	0.274111	-8.92774	0.257647	0	91.5798	0.711752	89.121	76.367	4.898	15.204	-352.478
BVC	Both	Mat=-01	Pht=-10	Yld=010	Gpc=80	w(-1,-10,10,80)	GPC=0	0.274111	-8.92774	0.257647	0	91.5798	0.638905	89.121	76.367	4.898	15.204	-352.478
BVC	Both	Mat=-01	Pht=-10	Yld=020	Gpc=01	w(-1,-10,20,1)	GPC=0	0.36938	-8.88194	0.294717	4.63936e-16	94.3444	0.810631	89.178	76.496	4.959	15.223	-269.991
BVC	Both	Mat=-01	Pht=-10	Yld=020	Gpc=10	w(-1,-10,20,10)	GPC=0	0.36938	-8.88194	0.294717	-2.31968e-16	94.3444	0.876675	89.178	76.496	4.959	15.223	-269.991
BVC	Both	Mat=-01	Pht=-10	Yld=020	Gpc=20	w(-1,-10,20,20)	GPC=0	0.36938	-8.88194	0.294717	2.31968e-16	94.3444	0.933578	89.178	76.496	4.959	15.223	-269.991
BVC	Both	Mat=-01	Pht=-10	Yld=020	Gpc=30	w(-1,-10,20,30)	GPC=0	0.36938	-8.88194	0.294717	8.69881e-17	94.3444	0.957924	89.178	76.496	4.959	15.223	-269.991
BVC	Both	Mat=-01	Pht=-10	Yld=020	Gpc=40	w(-1,-10,20,40)	GPC=0	0.36938	-8.88194	0.294717	-1.73976e-16	94.3444	0.94139	89.178	76.496	4.959	15.223	-269.991
BVC	Both	Mat=-01	Pht=-10	Yld=020	Gpc=50	w(-1,-10,20,50)	GPC=0	0.36938	-8.88194	0.294717	-2.8996e-16	94.3444	0.889738	89.178	76.496	4.959	15.223	-269.991
BVC	Both	Mat=-01	Pht=-10	Yld=020	Gpc=60	w(-1,-10,20,60)	GPC=0	0.36938	-8.88194	0.294717	-4.63936e-16	94.3444	0.818073	89.178	76.496	4.959	15.223	-269.991
BVC	Both	Mat=-01	Pht=-10	Yld=020	Gpc=70	w(-1,-10,20,70)	GPC=0	0.36938	-8.88194	0.294717	2.8996e-17	94.3444	0.740957	89.178	76.496	4.959	15.223	-269.991
BVC	Both	Mat=-01	Pht=-10	Yld=020	Gpc=80	w(-1,-10,20,80)	GPC=0	0.36938	-8.88194	0.294717	0	94.3444	0.667431	89.178	76.496	4.959	15.223	-269.991
BVC	Both	Mat=-01	Pht=-10	Yld=030	Gpc=01	w(-1,-10,30,1)	GPC=0	0.457556	-8.80663	0.328478	2.24545e-16	97.4631	0.798817	89.222	76.9005	5.0275	15.2945	-187.069
BVC	Both	Mat=-01	Pht=-10	Yld=030	Gpc=10	w(-1,-10,30,10)	GPC=0	0.457556	-8.80663	0.328478	3.92955e-16	97.4631	0.864073	89.222	76.9005	5.0275	15.2945	-187.069
BVC	Both	Mat=-01	Pht=-10	Yld=030	Gpc=20	w(-1,-10,30,20)	GPC=0	0.457556	-8.80663	0.328478	0	97.4631	0.923741	89.222	76.9005	5.0275	15.2945	-187.069
BVC	Both	Mat=-01	Pht=-10	Yld=030	Gpc=30	w(-1,-10,30,30)	GPC=0	0.457556	-8.80663	0.328478	2.24545e-16	97.4631	0.955801	89.222	76.9005	5.0275	15.2945	-187.069
BVC	Both	Mat=-01	Pht=-10	Yld=030	Gpc=40	w(-1,-10,30,40)	GPC=0	0.457556	-8.80663	0.328478	-1.68409e-16	97.4631	0.950244	89.222	76.9005	5.0275	15.2945	-187.069
BVC	Both	Mat=-01	Pht=-10	Yld=030	Gpc=50	w(-1,-10,30,50)	GPC=0	0.457556	-8.80663	0.328478	0	97.4631	0.908924	89.222	76.9005	5.0275	15.2945	-187.069
BVC	Both	Mat=-01	Pht=-10	Yld=030	Gpc=60	w(-1,-10,30,60)	GPC=0	0.457556	-8.80663	0.328478	-2.24545e-16	97.4631	0.84408	89.222	76.9005	5.0275	15.2945	-187.069
BVC	Both	Mat=-01	Pht=-10	Yld=030	Gpc=70	w(-1,-10,30,70)	GPC=0	0.457556	-8.80663	0.328478	-2.24545e-16	97.4631	0.769954	89.222	76.9005	5.0275	15.2945	-187.069
BVC	Both	Mat=-01	Pht=-10	Yld=030	Gpc=80	w(-1,-10,30,80)	GPC=0	0.457556	-8.80663	0.328478	-4.49091e-16	97.4631	0.696695	89.222	76.9005	5.0275	15.2945	-187.069
BVC	Both	Mat=-01	Pht=-10	Yld=040	Gpc=01	w(-1,-10,40,1)	GPC=0	0.538544	-8.70817	0.358999	0	100.903	0.788371	89.1515	76.959	5.048	15.2895	-103.652
BVC	Both	Mat=-01	Pht=-10	Yld=040	Gpc=10	w(-1,-10,40,10)	GPC=0	0.538544	-8.70817	0.358999	0	100.903	0.852235	89.1515	76.959	5.048	15.2895	-103.652
BVC	Both	Mat=-01	Pht=-10	Yld=040	Gpc=20	w(-1,-10,40,20)	GPC=0	0.538544	-8.70817	0.358999	5.42225e-17	100.903	0.913314	89.1515	76.959	5.048	15.2895	-103.652
BVC	Both	Mat=-01	Pht=-10	Yld=040	Gpc=30	w(-1,-10,40,30)	GPC=0	0.538544	-8.70817	0.358999	0	100.903	0.951331	89.1515	76.959	5.048	15.2895	-103.652
BVC	Both	Mat=-01	Pht=-10	Yld=040	Gpc=40	w(-1,-10,40,40)	GPC=0	0.538544	-8.70817	0.358999	5.42225e-17	100.903	0.955579	89.1515	76.959	5.048	15.2895	-103.652
BVC	Both	Mat=-01	Pht=-10	Yld=040	Gpc=50	w(-1,-10,40,50)	GPC=0	0.538544	-8.70817	0.358999	-5.42225e-17	100.903	0.924725	89.1515	76.959	5.048	15.2895	-103.652
BVC	Both	Mat=-01	Pht=-10	Yld=040	Gpc=60	w(-1,-10,40,60)	GPC=0	0.538544	-8.70817	0.358999	-2.1689e-16	100.903	0.867819	89.1515	76.959	5.048	15.2895	-103.652
BVC	Both	Mat=-01	Pht=-10	Yld=040	Gpc=70	w(-1,-10,40,70)	GPC=0	0.538544	-8.70817	0.358999	-4.3378e-16	100.903	0.798005	89.1515	76.959	5.048	15.2895	-103.652
BVC	Both	Mat=-01	Pht=-10	Yld=040	Gpc=80	w(-1,-10,40,80)	GPC=0	0.538544	-8.70817	0.358999	0	100.903	0.726066	89.1515	76.959	5.048	15.2895	-103.652
BVC	Both	Mat=-01	Pht=-10	Yld=050	Gpc=01	w(-1,-10,50,1)	GPC=0	0.612492	-8.59235	0.386434	0	104.633	0.77923	89.1515	76.959	5.048	15.2895	-20.1909
BVC	Both	Mat=-01	Pht=-10	Yld=050	Gpc=10	w(-1,-10,50,10)	GPC=0	0.612492	-8.59235	0.386434	-4.18318e-16	104.633	0.84131	89.1515	76.959	5.048	15.2895	-20.1909
BVC	Both	Mat=-01	Pht=-10	Yld=050	Gpc=20	w(-1,-10,50,20)	GPC=0	0.612492	-8.59235	0.386434	0	104.633	0.90276	89.1515	76.959	5.048	15.2895	-20.1909
BVC	Both	Mat=-01	Pht=-10	Yld=050	Gpc=30	w(-1,-10,50,30)	GPC=0	0.612492	-8.59235	0.386434	-1.56869e-16	104.633	0.945143	89.1515	76.959	5.048	15.2895	-20.1909
BVC	Both	Mat=-01	Pht=-10	Yld=050	Gpc=40	w(-1,-10,50,40)	GPC=0	0.612492	-8.59235	0.386434	-1.0458e-16	104.633	0.957791	89.1515	76.959	5.048	15.2895	-20.1909
BVC	Both	Mat=-01	Pht=-10	Yld=050	Gpc=50	w(-1,-10,50,50)	GPC=0	0.612492	-8.59235	0.386434	-1.0458e-16	104.633	0.93703	89.1515	76.959	5.048	15.2895	-20.1909
BVC	Both	Mat=-01	Pht=-10	Yld=050	Gpc=60	w(-1,-10,50,60)	GPC=0	0.612492	-8.59235	0.386434	1.0458e-16	104.633	0.888768	89.1515	76.959	5.048	15.2895	-20.1909
BVC	Both	Mat=-01	Pht=-10	Yld=050	Gpc=70	w(-1,-10,50,70)	GPC=0	0.612492	-8.59235	0.386434	-2.09159e-16	104.633	0.824442	89.1515	76.959	5.048	15.2895	-20.1909
BVC	Both	Mat=-01	Pht=-10	Yld=050	Gpc=80	w(-1,-10,50,80)	GPC=0	0.612492	-8.59235	0.386434	2.09159e-16	104.633	0.754916	89.1515	76.959	5.048	15.2895	-20.1909
BVC	Both	Mat=-01	Pht=-10	Yld=060	Gpc=01	w(-1,-10,60,1)	GPC=0	0.679719	-8.46422	0.410996	1.00739e-16	108.622	0.771294	89.1515	76.959	5.048	15.2895	63.2697
BVC	Both	Mat=-01	Pht=-10	Yld=060	Gpc=10	w(-1,-10,60,10)	GPC=0	0.679719	-8.46422	0.410996	4.02954e-16	108.622	0.831358	89.1515	76.959	5.048	15.2895	63.2697
BVC	Both	Mat=-01	Pht=-10	Yld=060	Gpc=20	w(-1,-10,60,20)	GPC=0	0.679719	-8.46422	0.410996	0	108.622	0.892409	89.1515	76.959	5.048	15.2895	63.2697
BVC	Both	Mat=-01	Pht=-10	Yld=060	Gpc=30	w(-1,-10,60,30)	GPC=0	0.679719	-8.46422	0.410996	0	108.622	0.937804	89.1515	76.959	5.048	15.2895	63.2697
BVC	Both	Mat=-01	Pht=-10	Yld=060	Gpc=40	w(-1,-10,60,40)	GPC=0	0.679719	-8.46422	0.410996	0	108.622	0.957391	89.1515	76.959	5.048	15.2895	63.2697
BVC	Both	Mat=-01	Pht=-10	Yld=060	Gpc=50	w(-1,-10,60,50)	GPC=0	0.679719	-8.46422	0.410996	2.01477e-16	108.622	0.945961	89.1515	76.959	5.048	15.2895	63.2697
BVC	Both	Mat=-01	Pht=-10	Yld=060	Gpc=60	w(-1,-10,60,60)	GPC=0	0.679719	-8.46422	0.410996	0	108.622	0.906619	89.1515	76.959	5.048	15.2895	63.2697
BVC	Both	Mat=-01	Pht=-10	Yld=060	Gpc=70	w(-1,-10,60,70)	GPC=0	0.679719	-8.46422	0.410996	-1.00739e-16	108.622	0.848717	89.1515	76.959	5.048	15.2895	63.2697
BVC	Both	Mat=-01	Pht=-10	Yld=060	Gpc=80	w(-1,-10,60,80)	GPC=0	0.679719	-8.46422	0.410996	-1.00739e-16	108.622	0.782659	89.1515	76.959	5.048	15.2895	63.2697
BVC	Both	Mat=-01	Pht=-10	Yld=070	Gpc=01	w(-1,-10,70,1)	GPC=0	0.740656	-8.32798	0.432924	9.69698e-17	112.844	0.764443	89.2825	76.9765	5.073	15.258	146.751
BVC	Both	Mat=-01	Pht=-10	Yld=070	Gpc=10	w(-1,-10,70,10)	GPC=0	0.740656	-8.32798	0.432924	0	112.844	0.822375	89.2825	76.9765	5.073	15.258	146.751
BVC	Both	Mat=-01	Pht=-10	Yld=070	Gpc=20	w(-1,-10,70,20)	GPC=0	0.740656	-8.32798	0.432924	-9.69698e-17	112.844	0.882483	89.2825	76.9765	5.073	15.258	146.751
BVC	Both	Mat=-01	Pht=-10	Yld=070	Gpc=30	w(-1,-10,70,30)	GPC=0	0.740656	-8.32798	0.432924	0	112.844	0.929784	89.2825	76.9765	5.073	15.258	146.751
BVC	Both	Mat=-01	Pht=-10	Yld=070	Gpc=40	w(-1,-10,70,40)	GPC=0	0.740656	-8.32798	0.432924	1.9394e-16	112.844	0.954915	89.2825	76.9765	5.073	15.258	146.751
BVC	Both	Mat=-01	Pht=-10	Yld=070	Gpc=50	w(-1,-10,70,50)	GPC=0	0.740656	-8.32798	0.432924	9.69698e-17	112.844	0.951813	89.2825	76.9765	5.073	15.258	146.751
BVC	Both	Mat=-01	Pht=-10	Yld=070	Gpc=60	w(-1,-10,70,60)	GPC=0	0.740656	-8.32798	0.432924	-2.90909e-16	112.844	0.92127	89.2825	76.9765	5.073	15.258	146.751
BVC	Both	Mat=-01	Pht=-10	Yld=070	Gpc=70	w(-1,-10,70,70)	GPC=0	0.740656	-8.32798	0.432924	0	112.844	0.870433	89.2825	76.9765	5.073	15.258	146.751
BVC	Both	Mat=-01	Pht=-10	Yld=070	Gpc=80	w(-1,-10,70,80)	GPC=0	0.740656	-8.32798	0.432924	-4.84849e-16	112.844	0.808783	89.2825	76.9765	5.073	15.258	146.751
BVC	Both	Mat=-01	Pht=-10	Yld=080	Gpc=01	w(-1,-10,80,1)	GPC=0	0.79579	-8.18709	0.452471	2.79923e-16	117.273	0.758551	89.6165	77.117	5.1055	15.2405	230.368
BVC	Both	Mat=-01	Pht=-10	Yld=080	Gpc=10	w(-1,-10,80,10)	GPC=0	0.79579	-8.18709	0.452471	9.33077e-17	117.273	0.814316	89.6165	77.117	5.1055	15.2405	230.368
BVC	Both	Mat=-01	Pht=-10	Yld=080	Gpc=20	w(-1,-10,80,20)	GPC=0	0.79579	-8.18709	0.452471	-1.86615e-16	117.273	0.873114	89.6165	77.117	5.1055	15.2405	230.368
BVC	Both	Mat=-01	Pht=-10	Yld=080	Gpc=30	w(-1,-10,80,30)	GPC=0	0.79579	-8.18709	0.452471	-3.73231e-16	117.273	0.921451	89.6165	77.117	5.1055	15.2405	230.368
BVC	Both	Mat=-01	Pht=-10	Yld=080	Gpc=40	w(-1,-10,80,40)	GPC=0	0.79579	-8.18709	0.452471	1.86615e-16	117.273	0.950872	89.6165	77.117	5.1055	15.2405	230.368
BVC	Both	Mat=-01	Pht=-10	Yld=080	Gpc=50	w(-1,-10,80,50)	GPC=0	0.79579	-8.18709	0.452471	0	117.273	0.95498	89.6165	77.117	5.1055	15.2405	230.368
BVC	Both	Mat=-01	Pht=-10	Yld=080	Gpc=60	w(-1,-10,80,60)	GPC=0	0.79579	-8.18709	0.452471	-2.79923e-16	117.273	0.932801	89.6165	77.117	5.1055	15.2405	230.368
BVC	Both	Mat=-01	Pht=-10	Yld=080	Gpc=70	w(-1,-10,80,70)	GPC=0	0.79579	-8.18709	0.452471	-1.86615e-16	117.273	0.889357	89.6165	77.117	5.1055	15.2405	230.368
BVC	Both	Mat=-01	Pht=-10	Yld=080	Gpc=80	w(-1,-10,80,80)	GPC=0	0.79579	-8.18709	0.452471	-9.33077e-17	117.273	0.832878	89.6165	77.117	5.1055	15.2405	230.368
BVC	Both	Mat=-01	Pht=-10	Yld=090	Gpc=01	w(-1,-10,90,1)	GPC=0	0.845628	-8.04425	0.469882	2.69328e-16	121.886	0.753497	89.6165	77.117	5.1055	15.2405	314.23
BVC	Both	Mat=-01	Pht=-10	Yld=090	Gpc=10	w(-1,-10,90,10)	GPC=0	0.845628	-8.04425	0.469882	-1.79552e-16	121.886	0.807114	89.6165	77.117	5.1055	15.2405	314.23
BVC	Both	Mat=-01	Pht=-10	Yld=090	Gpc=20	w(-1,-10,90,20)	GPC=0	0.845628	-8.04425	0.469882	0	121.886	0.864368	89.6165	77.117	5.1055	15.2405	314.23
BVC	Both	Mat=-01	Pht=-10	Yld=090	Gpc=30	w(-1,-10,90,30)	GPC=0	0.845628	-8.04425	0.469882	0	121.886	0.913075	89.6165	77.117	5.1055	15.2405	314.23
BVC	Both	Mat=-01	Pht=-10	Yld=090	Gpc=40	w(-1,-10,90,40)	GPC=0	0.845628	-8.04425	0.469882	-8.97759e-17	121.886	0.94571	89.6165	77.117	5.1055	15.2405	314.23
BVC	Both	Mat=-01	Pht=-10	Yld=090	Gpc=50	w(-1,-10,90,50)	GPC=0	0.845628	-8.04425	0.469882	1.79552e-16	121.886	0.955902	89.6165	77.117	5.1055	15.2405	314.23
BVC	Both	Mat=-01	Pht=-10	Yld=090	Gpc=60	w(-1,-10,90,60)	GPC=0	0.845628	-8.04425	0.469882	-3.59104e-16	121.886	0.941425	89.6165	77.117	5.1055	15.2405	314.23
BVC	Both	Mat=-01	Pht=-10	Yld=090	Gpc=70	w(-1,-10,90,70)	GPC=0	0.845628	-8.04425	0.469882	0	121.886	0.905408	89.6165	77.117	5.1055	15.2405	314.23
BVC	Both	Mat=-01	Pht=-10	Yld=090	Gpc=80	w(-1,-10,90,80)	GPC=0	0.845628	-8.04425	0.469882	0	121.886	0.854653	89.6165	77.117	5.1055	15.2405	314.23
BVC	Both	Mat=-01	Pht=-10	Yld=100	Gpc=01	w(-1,-10,100,1)	GPC=0	0.890673	-7.90156	0.485392	6.91116e-16	126.664	0.749169	89.6165	77.117	5.1055	15.2405	398.092
BVC	Both	Mat=-01	Pht=-10	Yld=100	Gpc=10	w(-1,-10,100,10)	GPC=0	0.890673	-7.90156	0.485392	2.59169e-16	126.664	0.800695	89.6165	77.117	5.1055	15.2405	398.092
BVC	Both	Mat=-01	Pht=-10	Yld=100	Gpc=20	w(-1,-10,100,20)	GPC=0	0.890673	-7.90156	0.485392	3.45558e-16	126.664	0.856267	89.6165	77.117	5.1055	15.2405	398.092
BVC	Both	Mat=-01	Pht=-10	Yld=100	Gpc=30	w(-1,-10,100,30)	GPC=0	0.890673	-7.90156	0.485392	0	126.664	0.904848	89.6165	77.117	5.1055	15.2405	398.092
BVC	Both	Mat=-01	Pht=-10	Yld=100	Gpc=40	w(-1,-10,100,40)	GPC=0	0.890673	-7.90156	0.485392	1.72779e-16	126.664	0.939798	89.6165	77.117	5.1055	15.2405	398.092
BVC	Both	Mat=-01	Pht=-10	Yld=100	Gpc=50	w(-1,-10,100,50)	GPC=0	0.890673	-7.90156	0.485392	-8.63895e-17	126.664	0.955011	89.6165	77.117	5.1055	15.2405	398.092
BVC	Both	Mat=-01	Pht=-10	Yld=100	Gpc=60	w(-1,-10,100,60)	GPC=0	0.890673	-7.90156	0.485392	-1.72779e-16	126.664	0.947444	89.6165	77.117	5.1055	15.2405	398.092
BVC	Both	Mat=-01	Pht=-10	Yld=100	Gpc=70	w(-1,-10,100,70)	GPC=0	0.890673	-7.90156	0.485392	3.45558e-16	126.664	0.91864	89.6165	77.117	5.1055	15.2405	398.092
BVC	Both	Mat=-01	Pht=-10	Yld=100	Gpc=80	w(-1,-10,100,80)	GPC=0	0.890673	-7.90156	0.485392	0	126.664	0.873938	89.6165	77.117	5.1055	15.2405	398.092
BVC	Both	Mat=-01	Pht=-10	Yld=110	Gpc=01	w(-1,-10,110,1)	GPC=0	0.931406	-7.76059	0.499218	0	131.588	0.745467	89.628	77.753	5.136	15.3025	481.99
BVC	Both	Mat=-01	Pht=-10	Yld=110	Gpc=10	w(-1,-10,110,10)	GPC=0	0.931406	-7.76059	0.499218	0	131.588	0.794978	89.628	77.753	5.136	15.3025	481.99
BVC	Both	Mat=-01	Pht=-10	Yld=110	Gpc=20	w(-1,-10,110,20)	GPC=0	0.931406	-7.76059	0.499218	3.32626e-16	131.588	0.848803	89.628	77.753	5.136	15.3025	481.99
BVC	Both	Mat=-01	Pht=-10	Yld=110	Gpc=30	w(-1,-10,110,30)	GPC=0	0.931406	-7.76059	0.499218	1.66313e-16	131.588	0.896896	89.628	77.753	5.136	15.3025	481.99
BVC	Both	Mat=-01	Pht=-10	Yld=110	Gpc=40	w(-1,-10,110,40)	GPC=0	0.931406	-7.76059	0.499218	-1.66313e-16	131.588	0.933433	89.628	77.753	5.136	15.3025	481.99
BVC	Both	Mat=-01	Pht=-10	Yld=110	Gpc=50	w(-1,-10,110,50)	GPC=0	0.931406	-7.76059	0.499218	-1.66313e-16	131.588	0.952704	89.628	77.753	5.136	15.3025	481.99
BVC	Both	Mat=-01	Pht=-10	Yld=110	Gpc=60	w(-1,-10,110,60)	GPC=0	0.931406	-7.76059	0.499218	0	131.588	0.9512	89.628	77.753	5.136	15.3025	481.99
BVC	Both	Mat=-01	Pht=-10	Yld=110	Gpc=70	w(-1,-10,110,70)	GPC=0	0.931406	-7.76059	0.499218	3.32626e-16	131.588	0.929208	89.628	77.753	5.136	15.3025	481.99
BVC	Both	Mat=-01	Pht=-10	Yld=110	Gpc=80	w(-1,-10,110,80)	GPC=0	0.931406	-7.76059	0.499218	-1.66313e-16	131.588	0.890673	89.628	77.753	5.136	15.3025	481.99
BVC	Both	Mat=-01	Pht=-10	Yld=120	Gpc=01	w(-1,-10,120,1)	GPC=0	0.968273	-7.62249	0.511557	1.60161e-16	136.643	0.742302	89.869	77.9765	5.2145	15.188	566.279
BVC	Both	Mat=-01	Pht=-10	Yld=120	Gpc=10	w(-1,-10,120,10)	GPC=0	0.968273	-7.62249	0.511557	6.40642e-16	136.643	0.789888	89.869	77.9765	5.2145	15.188	566.279
BVC	Both	Mat=-01	Pht=-10	Yld=120	Gpc=20	w(-1,-10,120,20)	GPC=0	0.968273	-7.62249	0.511557	6.40642e-16	136.643	0.841948	89.869	77.9765	5.2145	15.188	566.279
BVC	Both	Mat=-01	Pht=-10	Yld=120	Gpc=30	w(-1,-10,120,30)	GPC=0	0.968273	-7.62249	0.511557	0	136.643	0.889297	89.869	77.9765	5.2145	15.188	566.279
BVC	Both	Mat=-01	Pht=-10	Yld=120	Gpc=40	w(-1,-10,120,40)	GPC=0	0.968273	-7.62249	0.511557	1.60161e-16	136.643	0.926839	89.869	77.9765	5.2145	15.188	566.279
BVC	Both	Mat=-01	Pht=-10	Yld=120	Gpc=50	w(-1,-10,120,50)	GPC=0	0.968273	-7.62249	0.511557	0	136.643	0.949329	89.869	77.9765	5.2145	15.188	566.279
BVC	Both	Mat=-01	Pht=-10	Yld=120	Gpc=60	w(-1,-10,120,60)	GPC=0	0.968273	-7.62249	0.511557	3.20321e-16	136.643	0.953049	89.869	77.9765	5.2145	15.188	566.279
BVC	Both	Mat=-01	Pht=-10	Yld=120	Gpc=70	w(-1,-10,120,70)	GPC=0	0.968273	-7.62249	0.511557	-1.60161e-16	136.643	0.937338	89.869	77.9765	5.2145	15.188	566.279
BVC	Both	Mat=-01	Pht=-10	Yld=120	Gpc=80	w(-1,-10,120,80)	GPC=0	0.968273	-7.62249	0.511557	-1.60161e-16	136.643	0.904896	89.869	77.9765	5.2145	15.188	566.279
BVC	Both	Mat=-01	Pht=-10	Yld=130	Gpc=01	w(-1,-10,130,1)	GPC=0	1.00168	-7.48808	0.522585	0	141.815	0.739597	89.869	77.9765	5.2145	15.188	650.938
BVC	Both	Mat=-01	Pht=-10	Yld=130	Gpc=10	w(-1,-10,130,10)	GPC=0	1.00168	-7.48808	0.522585	3.0864e-16	141.815	0.785353	89.869	77.9765	5.2145	15.188	650.938
BVC	Both	Mat=-01	Pht=-10	Yld=130	Gpc=20	w(-1,-10,130,20)	GPC=0	1.00168	-7.48808	0.522585	0	141.815	0.835666	89.869	77.9765	5.2145	15.188	650.938
BVC	Both	Mat=-01	Pht=-10	Yld=130	Gpc=30	w(-1,-10,130,30)	GPC=0	1.00168	-7.48808	0.522585	3.0864e-16	141.815	0.882095	89.869	77.9765	5.2145	15.188	650.938
BVC	Both	Mat=-01	Pht=-10	Yld=130	Gpc=40	w(-1,-10,130,40)	GPC=0	1.00168	-7.48808	0.522585	0	141.815	0.920187	89.869	77.9765	5.2145	15.188	650.938
BVC	Both	Mat=-01	Pht=-10	Yld=130	Gpc=50	w(-1,-10,130,50)	GPC=0	1.00168	-7.48808	0.522585	0	141.815	0.945178	89.869	77.9765	5.2145	15.188	650.938
BVC	Both	Mat=-01	Pht=-10	Yld=130	Gpc=60	w(-1,-10,130,60)	GPC=0	1.00168	-7.48808	0.522585	0	141.815	0.953325	89.869	77.9765	5.2145	15.188	650.938
BVC	Both	Mat=-01	Pht=-10	Yld=130	Gpc=70	w(-1,-10,130,70)	GPC=0	1.00168	-7.48808	0.522585	0	141.815	0.943295	89.869	77.9765	5.2145	15.188	650.938
BVC	Both	Mat=-01	Pht=-10	Yld=130	Gpc=80	w(-1,-10,130,80)	GPC=0	1.00168	-7.48808	0.522585	-1.5432e-16	141.815	0.916722	89.869	77.9765	5.2145	15.188	650.938
BVC	Both	Mat=-01	Pht=-10	Yld=140	Gpc=01	w(-1,-10,140,1)	GPC=0	1.03201	-7.35791	0.532459	2.97569e-16	147.091	0.737285	89.869	77.9765	5.2145	15.188	735.597
BVC	Both	Mat=-01	Pht=-10	Yld=140	Gpc=10	w(-1,-10,140,10)	GPC=0	1.03201	-7.35791	0.532459	0	147.091	0.781309	89.869	77.9765	5.2145	15.188	735.597
BVC	Both	Mat=-01	Pht=-10	Yld=140	Gpc=20	w(-1,-10,140,20)	GPC=0	1.03201	-7.35791	0.532459	1.48784e-16	147.091	0.829914	89.869	77.9765	5.2145	15.188	735.597
BVC	Both	Mat=-01	Pht=-10	Yld=140	Gpc=30	w(-1,-10,140,30)	GPC=0	1.03201	-7.35791	0.532459	0	147.091	0.875307	89.869	77.9765	5.2145	15.188	735.597
BVC	Both	Mat=-01	Pht=-10	Yld=140	Gpc=40	w(-1,-10,140,40)	GPC=0	1.03201	-7.35791	0.532459	2.97569e-16	147.091	0.913596	89.869	77.9765	5.2145	15.188	735.597
BVC	Both	Mat=-01	Pht=-10	Yld=140	Gpc=50	w(-1,-10,140,50)	GPC=0	1.03201	-7.35791	0.532459	1.48784e-16	147.091	0.940487	89.869	77.9765	5.2145	15.188	735.597
BVC	Both	Mat=-01	Pht=-10	Yld=140	Gpc=60	w(-1,-10,140,60)	GPC=0	1.03201	-7.35791	0.532459	1.48784e-16	147.091	0.952337	89.869	77.9765	5.2145	15.188	735.597
BVC	Both	Mat=-01	Pht=-10	Yld=140	Gpc=70	w(-1,-10,140,70)	GPC=0	1.03201	-7.35791	0.532459	-1.48784e-16	147.091	0.947359	89.869	77.9765	5.2145	15.188	735.597
BVC	Both	Mat=-01	Pht=-10	Yld=140	Gpc=80	w(-1,-10,140,80)	GPC=0	1.03201	-7.35791	0.532459	0	147.091	0.926319	89.869	77.9765	5.2145	15.188	735.597
BVC	Both	Mat=-01	Pht=-10	Yld=150	Gpc=01	w(-1,-10,150,1)	GPC=0	1.05959	-7.23231	0.541317	2.87088e-16	152.461	0.73531	89.869	77.9765	5.2145	15.188	820.257
BVC	Both	Mat=-01	Pht=-10	Yld=150	Gpc=10	w(-1,-10,150,10)	GPC=0	1.05959	-7.23231	0.541317	4.30633e-16	152.461	0.777697	89.869	77.9765	5.2145	15.188	820.257
BVC	Both	Mat=-01	Pht=-10	Yld=150	Gpc=20	w(-1,-10,150,20)	GPC=0	1.05959	-7.23231	0.541317	2.87088e-16	152.461	0.824648	89.869	77.9765	5.2145	15.188	820.257
BVC	Both	Mat=-01	Pht=-10	Yld=150	Gpc=30	w(-1,-10,150,30)	GPC=0	1.05959	-7.23231	0.541317	0	152.461	0.868936	89.869	77.9765	5.2145	15.188	820.257
BVC	Both	Mat=-01	Pht=-10	Yld=150	Gpc=40	w(-1,-10,150,40)	GPC=0	1.05959	-7.23231	0.541317	0	152.461	0.907152	89.869	77.9765	5.2145	15.188	820.257
BVC	Both	Mat=-01	Pht=-10	Yld=150	Gpc=50	w(-1,-10,150,50)	GPC=0	1.05959	-7.23231	0.541317	-2.87088e-16	152.461	0.935448	89.869	77.9765	5.2145	15.188	820.257
BVC	Both	Mat=-01	Pht=-10	Yld=150	Gpc=60	w(-1,-10,150,60)	GPC=0	1.05959	-7.23231	0.541317	-2.87088e-16	152.461	0.950353	89.869	77.9765	5.2145	15.188	820.257
BVC	Both	Mat=-01	Pht=-10	Yld=150	Gpc=70	w(-1,-10,150,70)	GPC=0	1.05959	-7.23231	0.541317	-2.87088e-16	152.461	0.949807	89.869	77.9765	5.2145	15.188	820.257
BVC	Both	Mat=-01	Pht=-10	Yld=150	Gpc=80	w(-1,-10,150,80)	GPC=0	1.05959	-7.23231	0.541317	2.87088e-16	152.461	0.93389	89.869	77.9765	5.2145	15.188	820.257
BVC	Both	Mat=-01	Pht=-15	Yld=001	Gpc=01	w(-1,-15,1,1)	GPC=0	0.240347	-8.94292	0.22357	3.41628e-16	134.127	0.830993	89.121	76.367	4.898	15.204	-592.469
BVC	Both	Mat=-01	Pht=-15	Yld=001	Gpc=10	w(-1,-15,1,10)	GPC=0	0.240347	-8.94292	0.22357	1.98858e-16	134.127	0.876456	89.121	76.367	4.898	15.204	-592.469
BVC	Both	Mat=-01	Pht=-15	Yld=001	Gpc=20	w(-1,-15,1,20)	GPC=0	0.240347	-8.94292	0.22357	0	134.127	0.918861	89.121	76.367	4.898	15.204	-592.469
BVC	Both	Mat=-01	Pht=-15	Yld=001	Gpc=30	w(-1,-15,1,30)	GPC=0	0.240347	-8.94292	0.22357	-3.26331e-16	134.127	0.947188	89.121	76.367	4.898	15.204	-592.469
BVC	Both	Mat=-01	Pht=-15	Yld=001	Gpc=40	w(-1,-15,1,40)	GPC=0	0.240347	-8.94292	0.22357	1.78462e-16	134.127	0.956759	89.121	76.367	4.898	15.204	-592.469
BVC	Both	Mat=-01	Pht=-15	Yld=001	Gpc=50	w(-1,-15,1,50)	GPC=0	0.240347	-8.94292	0.22357	1.52968e-17	134.127	0.945824	89.121	76.367	4.898	15.204	-592.469
BVC	Both	Mat=-01	Pht=-15	Yld=001	Gpc=60	w(-1,-15,1,60)	GPC=0	0.240347	-8.94292	0.22357	-2.54946e-17	134.127	0.916374	89.121	76.367	4.898	15.204	-592.469
BVC	Both	Mat=-01	Pht=-15	Yld=001	Gpc=70	w(-1,-15,1,70)	GPC=0	0.240347	-8.94292	0.22357	1.01978e-17	134.127	0.873224	89.121	76.367	4.898	15.204	-592.469
BVC	Both	Mat=-01	Pht=-15	Yld=001	Gpc=80	w(-1,-15,1,80)	GPC=0	0.240347	-8.94292	0.22357	-1.83561e-16	134.127	0.822096	89.121	76.367	4.898	15.204	-592.469
BVC	Both	Mat=-01	Pht=-15	Yld=010	Gpc=01	w(-1,-15,10,1)	GPC=0	0.30098	-8.9381	0.247894	2.66033e-16	136.249	0.822343	89.121	76.367	4.898	15.204	-518.669
BVC	Both	Mat=-01	Pht=-15	Yld=010	Gpc=10	w(-1,-15,10,10)	GPC=0	0.30098	-8.9381	0.247894	1.60624e-16	136.249	0.868004	89.121	76.367	4.898	15.204	-518.669
BVC	Both	Mat=-01	Pht=-15	Yld=010	Gpc=20	w(-1,-15,10,20)	GPC=0	0.30098	-8.9381	0.247894	1.60624e-16	136.249	0.911824	89.121	76.367	4.898	15.204	-518.669
BVC	Both	Mat=-01	Pht=-15	Yld=010	Gpc=30	w(-1,-15,10,30)	GPC=0	0.30098	-8.9381	0.247894	2.40936e-16	136.249	0.943069	89.121	76.367	4.898	15.204	-518.669
BVC	Both	Mat=-01	Pht=-15	Yld=010	Gpc=40	w(-1,-15,10,40)	GPC=0	0.30098	-8.9381	0.247894	-1.60624e-16	136.249	0.956893	89.121	76.367	4.898	15.204	-518.669
BVC	Both	Mat=-01	Pht=-15	Yld=010	Gpc=50	w(-1,-15,10,50)	GPC=0	0.30098	-8.9381	0.247894	0	136.249	0.950874	89.121	76.367	4.898	15.204	-518.669
BVC	Both	Mat=-01	Pht=-15	Yld=010	Gpc=60	w(-1,-15,10,60)	GPC=0	0.30098	-8.9381	0.247894	-1.60624e-16	136.249	0.926088	89.121	76.367	4.898	15.204	-518.669
BVC	Both	Mat=-01	Pht=-15	Yld=010	Gpc=70	w(-1,-15,10,70)	GPC=0	0.30098	-8.9381	0.247894	0	136.249	0.88662	89.121	76.367	4.898	15.204	-518.669
BVC	Both	Mat=-01	Pht=-15	Yld=010	Gpc=80	w(-1,-15,10,80)	GPC=0	0.30098	-8.9381	0.247894	-3.06189e-16	136.249	0.837898	89.121	76.367	4.898	15.204	-518.669
BVC	Both	Mat=-01	Pht=-15	Yld=020	Gpc=01	w(-1,-15,20,1)	GPC=0	0.365512	-8.91682	0.273553	2.75811e-16	138.858	0.813262	89.178	76.496	4.959	15.223	-436.455
BVC	Both	Mat=-01	Pht=-15	Yld=020	Gpc=10	w(-1,-15,20,10)	GPC=0	0.365512	-8.91682	0.273553	1.18205e-16	138.858	0.858835	89.178	76.496	4.959	15.223	-436.455
BVC	Both	Mat=-01	Pht=-15	Yld=020	Gpc=20	w(-1,-15,20,20)	GPC=0	0.365512	-8.91682	0.273553	0	138.858	0.903736	89.178	76.496	4.959	15.223	-436.455
BVC	Both	Mat=-01	Pht=-15	Yld=020	Gpc=30	w(-1,-15,20,30)	GPC=0	0.365512	-8.91682	0.273553	-1.57606e-16	138.858	0.937647	89.178	76.496	4.959	15.223	-436.455
BVC	Both	Mat=-01	Pht=-15	Yld=020	Gpc=40	w(-1,-15,20,40)	GPC=0	0.365512	-8.91682	0.273553	1.57606e-16	138.858	0.955696	89.178	76.496	4.959	15.223	-436.455
BVC	Both	Mat=-01	Pht=-15	Yld=020	Gpc=50	w(-1,-15,20,50)	GPC=0	0.365512	-8.91682	0.273553	9.8504e-17	138.858	0.954888	89.178	76.496	4.959	15.223	-436.455
BVC	Both	Mat=-01	Pht=-15	Yld=020	Gpc=60	w(-1,-15,20,60)	GPC=0	0.365512	-8.91682	0.273553	-5.91024e-17	138.858	0.935364	89.178	76.496	4.959	15.223	-436.455
BVC	Both	Mat=-01	Pht=-15	Yld=020	Gpc=70	w(-1,-15,20,70)	GPC=0	0.365512	-8.91682	0.273553	-5.91024e-17	138.858	0.900336	89.178	76.496	4.959	15.223	-436.455
BVC	Both	Mat=-01	Pht=-15	Yld=020	Gpc=80	w(-1,-15,20,80)	GPC=0	0.365512	-8.91682	0.273553	1.57606e-16	138.858	0.854756	89.178	76.496	4.959	15.223	-436.455
BVC	Both	Mat=-01	Pht=-15	Yld=030	Gpc=01	w(-1,-15,30,1)	GPC=0	0.426913	-8.88069	0.297742	-3.86071e-17	141.716	0.804784	89.178	76.496	4.959	15.223	-353.892
BVC	Both	Mat=-01	Pht=-15	Yld=030	Gpc=10	w(-1,-15,30,10)	GPC=0	0.426913	-8.88069	0.297742	1.93035e-16	141.716	0.850003	89.178	76.496	4.959	15.223	-353.892
BVC	Both	Mat=-01	Pht=-15	Yld=030	Gpc=20	w(-1,-15,30,20)	GPC=0	0.426913	-8.88069	0.297742	1.93035e-16	141.716	0.895536	89.178	76.496	4.959	15.223	-353.892
BVC	Both	Mat=-01	Pht=-15	Yld=030	Gpc=30	w(-1,-15,30,30)	GPC=0	0.426913	-8.88069	0.297742	4.63285e-16	141.716	0.931544	89.178	76.496	4.959	15.223	-353.892
BVC	Both	Mat=-01	Pht=-15	Yld=030	Gpc=40	w(-1,-15,30,40)	GPC=0	0.426913	-8.88069	0.297742	-1.54428e-16	141.716	0.953256	89.178	76.496	4.959	15.223	-353.892
BVC	Both	Mat=-01	Pht=-15	Yld=030	Gpc=50	w(-1,-15,30,50)	GPC=0	0.426913	-8.88069	0.297742	0	141.716	0.957294	89.178	76.496	4.959	15.223	-353.892
BVC	Both	Mat=-01	Pht=-15	Yld=030	Gpc=60	w(-1,-15,30,60)	GPC=0	0.426913	-8.88069	0.297742	3.86071e-17	141.716	0.942983	89.178	76.496	4.959	15.223	-353.892
BVC	Both	Mat=-01	Pht=-15	Yld=030	Gpc=70	w(-1,-15,30,70)	GPC=0	0.426913	-8.88069	0.297742	-2.31642e-16	141.716	0.912646	89.178	76.496	4.959	15.223	-353.892
BVC	Both	Mat=-01	Pht=-15	Yld=030	Gpc=80	w(-1,-15,30,80)	GPC=0	0.426913	-8.88069	0.297742	0	141.716	0.870641	89.178	76.496	4.959	15.223	-353.892
BVC	Both	Mat=-01	Pht=-15	Yld=040	Gpc=01	w(-1,-15,40,1)	GPC=0	0.485099	-8.83165	0.320454	-1.51131e-16	144.808	0.796928	89.222	76.9005	5.0275	15.2945	-271.086
BVC	Both	Mat=-01	Pht=-15	Yld=040	Gpc=10	w(-1,-15,40,10)	GPC=0	0.485099	-8.83165	0.320454	-3.02261e-16	144.808	0.841584	89.222	76.9005	5.0275	15.2945	-271.086
BVC	Both	Mat=-01	Pht=-15	Yld=040	Gpc=20	w(-1,-15,40,20)	GPC=0	0.485099	-8.83165	0.320454	7.55653e-17	144.808	0.887372	89.222	76.9005	5.0275	15.2945	-271.086
BVC	Both	Mat=-01	Pht=-15	Yld=040	Gpc=30	w(-1,-15,40,30)	GPC=0	0.485099	-8.83165	0.320454	0	144.808	0.924958	89.222	76.9005	5.0275	15.2945	-271.086
BVC	Both	Mat=-01	Pht=-15	Yld=040	Gpc=40	w(-1,-15,40,40)	GPC=0	0.485099	-8.83165	0.320454	-1.13348e-16	144.808	0.949774	89.222	76.9005	5.0275	15.2945	-271.086
BVC	Both	Mat=-01	Pht=-15	Yld=040	Gpc=50	w(-1,-15,40,50)	GPC=0	0.485099	-8.83165	0.320454	-2.64479e-16	144.808	0.958216	89.222	76.9005	5.0275	15.2945	-271.086
BVC	Both	Mat=-01	Pht=-15	Yld=040	Gpc=60	w(-1,-15,40,60)	GPC=0	0.485099	-8.83165	0.320454	-1.51131e-16	144.808	0.948944	89.222	76.9005	5.0275	15.2945	-271.086
BVC	Both	Mat=-01	Pht=-15	Yld=040	Gpc=70	w(-1,-15,40,70)	GPC=0	0.485099	-8.83165	0.320454	0	144.808	0.923428	89.222	76.9005	5.0275	15.2945	-271.086
BVC	Both	Mat=-01	Pht=-15	Yld=040	Gpc=80	w(-1,-15,40,80)	GPC=0	0.485099	-8.83165	0.320454	-2.26696e-16	144.808	0.885347	89.222	76.9005	5.0275	15.2945	-271.086
BVC	Both	Mat=-01	Pht=-15	Yld=050	Gpc=01	w(-1,-15,50,1)	GPC=0	0.540049	-8.77163	0.341709	2.95503e-16	148.12	0.789695	89.222	76.9005	5.0275	15.2945	-187.781
BVC	Both	Mat=-01	Pht=-15	Yld=050	Gpc=10	w(-1,-15,50,10)	GPC=0	0.540049	-8.77163	0.341709	2.95503e-16	148.12	0.833629	89.222	76.9005	5.0275	15.2945	-187.781
BVC	Both	Mat=-01	Pht=-15	Yld=050	Gpc=20	w(-1,-15,50,20)	GPC=0	0.540049	-8.77163	0.341709	2.95503e-16	148.12	0.879361	89.222	76.9005	5.0275	15.2945	-187.781
BVC	Both	Mat=-01	Pht=-15	Yld=050	Gpc=30	w(-1,-15,50,30)	GPC=0	0.540049	-8.77163	0.341709	0	148.12	0.918069	89.222	76.9005	5.0275	15.2945	-187.781
BVC	Both	Mat=-01	Pht=-15	Yld=050	Gpc=40	w(-1,-15,50,40)	GPC=0	0.540049	-8.77163	0.341709	3.3244e-16	148.12	0.945449	89.222	76.9005	5.0275	15.2945	-187.781
BVC	Both	Mat=-01	Pht=-15	Yld=050	Gpc=50	w(-1,-15,50,50)	GPC=0	0.540049	-8.77163	0.341709	-3.69378e-17	148.12	0.957812	89.222	76.9005	5.0275	15.2945	-187.781
BVC	Both	Mat=-01	Pht=-15	Yld=050	Gpc=60	w(-1,-15,50,60)	GPC=0	0.540049	-8.77163	0.341709	-7.38756e-17	148.12	0.953305	89.222	76.9005	5.0275	15.2945	-187.781
BVC	Both	Mat=-01	Pht=-15	Yld=050	Gpc=70	w(-1,-15,50,70)	GPC=0	0.540049	-8.77163	0.341709	-1.84689e-16	148.12	0.932617	89.222	76.9005	5.0275	15.2945	-187.781
BVC	Both	Mat=-01	Pht=-15	Yld=050	Gpc=80	w(-1,-15,50,80)	GPC=0	0.540049	-8.77163	0.341709	0	148.12	0.898711	89.222	76.9005	5.0275	15.2945	-187.781
BVC	Both	Mat=-01	Pht=-15	Yld=060	Gpc=01	w(-1,-15,60,1)	GPC=0	0.591794	-8.70243	0.361543	1.44324e-16	151.637	0.783068	89.1515	76.959	5.048	15.2895	-104.341
BVC	Both	Mat=-01	Pht=-15	Yld=060	Gpc=10	w(-1,-15,60,10)	GPC=0	0.591794	-8.70243	0.361543	0	151.637	0.826165	89.1515	76.959	5.048	15.2895	-104.341
BVC	Both	Mat=-01	Pht=-15	Yld=060	Gpc=20	w(-1,-15,60,20)	GPC=0	0.591794	-8.70243	0.361543	0	151.637	0.871591	89.1515	76.959	5.048	15.2895	-104.341
BVC	Both	Mat=-01	Pht=-15	Yld=060	Gpc=30	w(-1,-15,60,30)	GPC=0	0.591794	-8.70243	0.361543	0	151.637	0.911028	89.1515	76.959	5.048	15.2895	-104.341
BVC	Both	Mat=-01	Pht=-15	Yld=060	Gpc=40	w(-1,-15,60,40)	GPC=0	0.591794	-8.70243	0.361543	2.16486e-16	151.637	0.940472	89.1515	76.959	5.048	15.2895	-104.341
BVC	Both	Mat=-01	Pht=-15	Yld=060	Gpc=50	w(-1,-15,60,50)	GPC=0	0.591794	-8.70243	0.361543	0	151.637	0.956259	89.1515	76.959	5.048	15.2895	-104.341
BVC	Both	Mat=-01	Pht=-15	Yld=060	Gpc=60	w(-1,-15,60,60)	GPC=0	0.591794	-8.70243	0.361543	7.2162e-17	151.637	0.956166	89.1515	76.959	5.048	15.2895	-104.341
BVC	Both	Mat=-01	Pht=-15	Yld=060	Gpc=70	w(-1,-15,60,70)	GPC=0	0.591794	-8.70243	0.361543	0	151.637	0.940204	89.1515	76.959	5.048	15.2895	-104.341
BVC	Both	Mat=-01	Pht=-15	Yld=060	Gpc=80	w(-1,-15,60,80)	GPC=0	0.591794	-8.70243	0.361543	-1.44324e-16	151.637	0.910623	89.1515	76.959	5.048	15.2895	-104.341
BVC	Both	Mat=-01	Pht=-15	Yld=070	Gpc=01	w(-1,-15,70,1)	GPC=0	0.640401	-8.62572	0.38001	0	155.346	0.777024	89.1515	76.959	5.048	15.2895	-20.8802
BVC	Both	Mat=-01	Pht=-15	Yld=070	Gpc=10	w(-1,-15,70,10)	GPC=0	0.640401	-8.62572	0.38001	2.81757e-16	155.346	0.8192	89.1515	76.959	5.048	15.2895	-20.8802
BVC	Both	Mat=-01	Pht=-15	Yld=070	Gpc=20	w(-1,-15,70,20)	GPC=0	0.640401	-8.62572	0.38001	2.81757e-16	155.346	0.864125	89.1515	76.959	5.048	15.2895	-20.8802
BVC	Both	Mat=-01	Pht=-15	Yld=070	Gpc=30	w(-1,-15,70,30)	GPC=0	0.640401	-8.62572	0.38001	2.81757e-16	155.346	0.903959	89.1515	76.959	5.048	15.2895	-20.8802
BVC	Both	Mat=-01	Pht=-15	Yld=070	Gpc=40	w(-1,-15,70,40)	GPC=0	0.640401	-8.62572	0.38001	7.04391e-17	155.346	0.935017	89.1515	76.959	5.048	15.2895	-20.8802
BVC	Both	Mat=-01	Pht=-15	Yld=070	Gpc=50	w(-1,-15,70,50)	GPC=0	0.640401	-8.62572	0.38001	0	155.346	0.953739	89.1515	76.959	5.048	15.2895	-20.8802
BVC	Both	Mat=-01	Pht=-15	Yld=070	Gpc=60	w(-1,-15,70,60)	GPC=0	0.640401	-8.62572	0.38001	0	155.346	0.95766	89.1515	76.959	5.048	15.2895	-20.8802
BVC	Both	Mat=-01	Pht=-15	Yld=070	Gpc=70	w(-1,-15,70,70)	GPC=0	0.640401	-8.62572	0.38001	-1.40878e-16	155.346	0.946233	89.1515	76.959	5.048	15.2895	-20.8802
BVC	Both	Mat=-01	Pht=-15	Yld=070	Gpc=80	w(-1,-15,70,80)	GPC=0	0.640401	-8.62572	0.38001	0	155.346	0.921023	89.1515	76.959	5.048	15.2895	-20.8802
BVC	Both	Mat=-01	Pht=-15	Yld=080	Gpc=01	w(-1,-15,80,1)	GPC=0	0.685974	-8.54303	0.39717	2.74879e-16	159.233	0.77153	89.1515	76.959	5.048	15.2895	62.5804
BVC	Both	Mat=-01	Pht=-15	Yld=080	Gpc=10	w(-1,-15,80,10)	GPC=0	0.685974	-8.54303	0.39717	2.74879e-16	159.233	0.812732	89.1515	76.959	5.048	15.2895	62.5804
BVC	Both	Mat=-01	Pht=-15	Yld=080	Gpc=20	w(-1,-15,80,20)	GPC=0	0.685974	-8.54303	0.39717	-2.74879e-16	159.233	0.857005	89.1515	76.959	5.048	15.2895	62.5804
BVC	Both	Mat=-01	Pht=-15	Yld=080	Gpc=30	w(-1,-15,80,30)	GPC=0	0.685974	-8.54303	0.39717	0	159.233	0.896963	89.1515	76.959	5.048	15.2895	62.5804
BVC	Both	Mat=-01	Pht=-15	Yld=080	Gpc=40	w(-1,-15,80,40)	GPC=0	0.685974	-8.54303	0.39717	-2.74879e-16	159.233	0.929237	89.1515	76.959	5.048	15.2895	62.5804
BVC	Both	Mat=-01	Pht=-15	Yld=080	Gpc=50	w(-1,-15,80,50)	GPC=0	0.685974	-8.54303	0.39717	-2.74879e-16	159.233	0.950428	89.1515	76.959	5.048	15.2895	62.5804
BVC	Both	Mat=-01	Pht=-15	Yld=080	Gpc=60	w(-1,-15,80,60)	GPC=0	0.685974	-8.54303	0.39717	2.74879e-16	159.233	0.957942	89.1515	76.959	5.048	15.2895	62.5804
BVC	Both	Mat=-01	Pht=-15	Yld=080	Gpc=70	w(-1,-15,80,70)	GPC=0	0.685974	-8.54303	0.39717	6.87197e-17	159.233	0.950783	89.1515	76.959	5.048	15.2895	62.5804
BVC	Both	Mat=-01	Pht=-15	Yld=080	Gpc=80	w(-1,-15,80,80)	GPC=0	0.685974	-8.54303	0.39717	0	159.233	0.9299	89.1515	76.959	5.048	15.2895	62.5804
BVC	Both	Mat=-01	Pht=-15	Yld=090	Gpc=01	w(-1,-15,90,1)	GPC=0	0.728636	-8.45571	0.413094	0	163.285	0.76655	89.1515	76.959	5.048	15.2895	146.041
BVC	Both	Mat=-01	Pht=-15	Yld=090	Gpc=10	w(-1,-15,90,10)	GPC=0	0.728636	-8.45571	0.413094	2.68057e-16	163.285	0.806746	89.1515	76.959	5.048	15.2895	146.041
BVC	Both	Mat=-01	Pht=-15	Yld=090	Gpc=20	w(-1,-15,90,20)	GPC=0	0.728636	-8.45571	0.413094	2.68057e-16	163.285	0.850256	89.1515	76.959	5.048	15.2895	146.041
BVC	Both	Mat=-01	Pht=-15	Yld=090	Gpc=30	w(-1,-15,90,30)	GPC=0	0.728636	-8.45571	0.413094	3.35071e-16	163.285	0.890116	89.1515	76.959	5.048	15.2895	146.041
BVC	Both	Mat=-01	Pht=-15	Yld=090	Gpc=40	w(-1,-15,90,40)	GPC=0	0.728636	-8.45571	0.413094	1.34028e-16	163.285	0.923262	89.1515	76.959	5.048	15.2895	146.041
BVC	Both	Mat=-01	Pht=-15	Yld=090	Gpc=50	w(-1,-15,90,50)	GPC=0	0.728636	-8.45571	0.413094	0	163.285	0.946493	89.1515	76.959	5.048	15.2895	146.041
BVC	Both	Mat=-01	Pht=-15	Yld=090	Gpc=60	w(-1,-15,90,60)	GPC=0	0.728636	-8.45571	0.413094	0	163.285	0.957172	89.1515	76.959	5.048	15.2895	146.041
BVC	Both	Mat=-01	Pht=-15	Yld=090	Gpc=70	w(-1,-15,90,70)	GPC=0	0.728636	-8.45571	0.413094	2.68057e-16	163.285	0.953966	89.1515	76.959	5.048	15.2895	146.041
BVC	Both	Mat=-01	Pht=-15	Yld=090	Gpc=80	w(-1,-15,90,80)	GPC=0	0.728636	-8.45571	0.413094	-2.68057e-16	163.285	0.937285	89.1515	76.959	5.048	15.2895	146.041
BVC	Both	Mat=-01	Pht=-15	Yld=100	Gpc=01	w(-1,-15,100,1)	GPC=0	0.768528	-8.36494	0.427855	1.30663e-16	167.491	0.762047	89.551	76.6315	5.0955	15.1485	229.555
BVC	Both	Mat=-01	Pht=-15	Yld=100	Gpc=10	w(-1,-15,100,10)	GPC=0	0.768528	-8.36494	0.427855	2.61326e-16	167.491	0.801222	89.551	76.6315	5.0955	15.1485	229.555
BVC	Both	Mat=-01	Pht=-15	Yld=100	Gpc=20	w(-1,-15,100,20)	GPC=0	0.768528	-8.36494	0.427855	-2.61326e-16	167.491	0.843889	89.551	76.6315	5.0955	15.1485	229.555
BVC	Both	Mat=-01	Pht=-15	Yld=100	Gpc=30	w(-1,-15,100,30)	GPC=0	0.768528	-8.36494	0.427855	-2.61326e-16	167.491	0.883472	89.551	76.6315	5.0955	15.1485	229.555
BVC	Both	Mat=-01	Pht=-15	Yld=100	Gpc=40	w(-1,-15,100,40)	GPC=0	0.768528	-8.36494	0.427855	2.61326e-16	167.491	0.917199	89.551	76.6315	5.0955	15.1485	229.555
BVC	Both	Mat=-01	Pht=-15	Yld=100	Gpc=50	w(-1,-15,100,50)	GPC=0	0.768528	-8.36494	0.427855	0	167.491	0.942082	89.551	76.6315	5.0955	15.1485	229.555
BVC	Both	Mat=-01	Pht=-15	Yld=100	Gpc=60	w(-1,-15,100,60)	GPC=0	0.768528	-8.36494	0.427855	6.53315e-17	167.491	0.95551	89.551	76.6315	5.0955	15.1485	229.555
BVC	Both	Mat=-01	Pht=-15	Yld=100	Gpc=70	w(-1,-15,100,70)	GPC=0	0.768528	-8.36494	0.427855	-2.61326e-16	167.491	0.955912	89.551	76.6315	5.0955	15.1485	229.555
BVC	Both	Mat=-01	Pht=-15	Yld=100	Gpc=80	w(-1,-15,100,80)	GPC=0	0.768528	-8.36494	0.427855	-2.61326e-16	167.491	0.943241	89.551	76.6315	5.0955	15.1485	229.555
BVC	Both	Mat=-01	Pht=-15	Yld=110	Gpc=01	w(-1,-15,110,1)	GPC=0	0.805799	-8.27178	0.441527	2.54714e-16	171.839	0.757982	89.551	76.6315	5.0955	15.1485	313.122
BVC	Both	Mat=-01	Pht=-15	Yld=110	Gpc=10	w(-1,-15,110,10)	GPC=0	0.805799	-8.27178	0.441527	2.54714e-16	171.839	0.796136	89.551	76.6315	5.0955	15.1485	313.122
BVC	Both	Mat=-01	Pht=-15	Yld=110	Gpc=20	w(-1,-15,110,20)	GPC=0	0.805799	-8.27178	0.441527	1.27357e-16	171.839	0.837904	89.551	76.6315	5.0955	15.1485	313.122
BVC	Both	Mat=-01	Pht=-15	Yld=110	Gpc=30	w(-1,-15,110,30)	GPC=0	0.805799	-8.27178	0.441527	0	171.839	0.877072	89.551	76.6315	5.0955	15.1485	313.122
BVC	Both	Mat=-01	Pht=-15	Yld=110	Gpc=40	w(-1,-15,110,40)	GPC=0	0.805799	-8.27178	0.441527	1.27357e-16	171.839	0.911134	89.551	76.6315	5.0955	15.1485	313.122
BVC	Both	Mat=-01	Pht=-15	Yld=110	Gpc=50	w(-1,-15,110,50)	GPC=0	0.805799	-8.27178	0.441527	3.82071e-16	171.839	0.937327	89.551	76.6315	5.0955	15.1485	313.122
BVC	Both	Mat=-01	Pht=-15	Yld=110	Gpc=60	w(-1,-15,110,60)	GPC=0	0.805799	-8.27178	0.441527	2.54714e-16	171.839	0.953109	89.551	76.6315	5.0955	15.1485	313.122
BVC	Both	Mat=-01	Pht=-15	Yld=110	Gpc=70	w(-1,-15,110,70)	GPC=0	0.805799	-8.27178	0.441527	1.27357e-16	171.839	0.956761	89.551	76.6315	5.0955	15.1485	313.122
BVC	Both	Mat=-01	Pht=-15	Yld=110	Gpc=80	w(-1,-15,110,80)	GPC=0	0.805799	-8.27178	0.441527	0	171.839	0.947861	89.551	76.6315	5.0955	15.1485	313.122
BVC	Both	Mat=-01	Pht=-15	Yld=120	Gpc=01	w(-1,-15,120,1)	GPC=0	0.840602	-8.17711	0.454185	0	176.318	0.754318	89.6165	77.117	5.1055	15.2405	396.874
BVC	Both	Mat=-01	Pht=-15	Yld=120	Gpc=10	w(-1,-15,120,10)	GPC=0	0.840602	-8.17711	0.454185	0	176.318	0.791459	89.6165	77.117	5.1055	15.2405	396.874
BVC	Both	Mat=-01	Pht=-15	Yld=120	Gpc=20	w(-1,-15,120,20)	GPC=0	0.840602	-8.17711	0.454185	-2.48243e-16	176.318	0.832296	89.6165	77.117	5.1055	15.2405	396.874
BVC	Both	Mat=-01	Pht=-15	Yld=120	Gpc=30	w(-1,-15,120,30)	GPC=0	0.840602	-8.17711	0.454185	2.48243e-16	176.318	0.870941	89.6165	77.117	5.1055	15.2405	396.874
BVC	Both	Mat=-01	Pht=-15	Yld=120	Gpc=40	w(-1,-15,120,40)	GPC=0	0.840602	-8.17711	0.454185	0	176.318	0.905136	89.6165	77.117	5.1055	15.2405	396.874
BVC	Both	Mat=-01	Pht=-15	Yld=120	Gpc=50	w(-1,-15,120,50)	GPC=0	0.840602	-8.17711	0.454185	1.24122e-16	176.318	0.932337	89.6165	77.117	5.1055	15.2405	396.874
BVC	Both	Mat=-01	Pht=-15	Yld=120	Gpc=60	w(-1,-15,120,60)	GPC=0	0.840602	-8.17711	0.454185	1.24122e-16	176.318	0.950112	89.6165	77.117	5.1055	15.2405	396.874
BVC	Both	Mat=-01	Pht=-15	Yld=120	Gpc=70	w(-1,-15,120,70)	GPC=0	0.840602	-8.17711	0.454185	0	176.318	0.956654	89.6165	77.117	5.1055	15.2405	396.874
BVC	Both	Mat=-01	Pht=-15	Yld=120	Gpc=80	w(-1,-15,120,80)	GPC=0	0.840602	-8.17711	0.454185	0	176.318	0.951253	89.6165	77.117	5.1055	15.2405	396.874
BVC	Both	Mat=-01	Pht=-15	Yld=130	Gpc=01	w(-1,-15,130,1)	GPC=0	0.873092	-8.08169	0.465901	-2.4193e-16	180.919	0.751018	89.6165	77.117	5.1055	15.2405	480.736
BVC	Both	Mat=-01	Pht=-15	Yld=130	Gpc=10	w(-1,-15,130,10)	GPC=0	0.873092	-8.08169	0.465901	4.83859e-16	180.919	0.787164	89.6165	77.117	5.1055	15.2405	480.736
BVC	Both	Mat=-01	Pht=-15	Yld=130	Gpc=20	w(-1,-15,130,20)	GPC=0	0.873092	-8.08169	0.465901	1.20965e-16	180.919	0.827051	89.6165	77.117	5.1055	15.2405	480.736
BVC	Both	Mat=-01	Pht=-15	Yld=130	Gpc=30	w(-1,-15,130,30)	GPC=0	0.873092	-8.08169	0.465901	3.62895e-16	180.919	0.865093	89.6165	77.117	5.1055	15.2405	480.736
BVC	Both	Mat=-01	Pht=-15	Yld=130	Gpc=40	w(-1,-15,130,40)	GPC=0	0.873092	-8.08169	0.465901	-2.4193e-16	180.919	0.899255	89.6165	77.117	5.1055	15.2405	480.736
BVC	Both	Mat=-01	Pht=-15	Yld=130	Gpc=50	w(-1,-15,130,50)	GPC=0	0.873092	-8.08169	0.465901	-2.4193e-16	180.919	0.927207	89.6165	77.117	5.1055	15.2405	480.736
BVC	Both	Mat=-01	Pht=-15	Yld=130	Gpc=60	w(-1,-15,130,60)	GPC=0	0.873092	-8.08169	0.465901	-1.20965e-16	180.919	0.946644	89.6165	77.117	5.1055	15.2405	480.736
BVC	Both	Mat=-01	Pht=-15	Yld=130	Gpc=70	w(-1,-15,130,70)	GPC=0	0.873092	-8.08169	0.465901	-1.20965e-16	180.919	0.955729	89.6165	77.117	5.1055	15.2405	480.736
BVC	Both	Mat=-01	Pht=-15	Yld=130	Gpc=80	w(-1,-15,130,80)	GPC=0	0.873092	-8.08169	0.465901	-2.4193e-16	180.919	0.953536	89.6165	77.117	5.1055	15.2405	480.736
BVC	Both	Mat=-01	Pht=-15	Yld=140	Gpc=01	w(-1,-15,140,1)	GPC=0	0.903422	-7.98614	0.476747	2.35786e-16	185.633	0.748049	89.6165	77.117	5.1055	15.2405	564.598
BVC	Both	Mat=-01	Pht=-15	Yld=140	Gpc=10	w(-1,-15,140,10)	GPC=0	0.903422	-7.98614	0.476747	2.35786e-16	185.633	0.783222	89.6165	77.117	5.1055	15.2405	564.598
BVC	Both	Mat=-01	Pht=-15	Yld=140	Gpc=20	w(-1,-15,140,20)	GPC=0	0.903422	-7.98614	0.476747	0	185.633	0.822154	89.6165	77.117	5.1055	15.2405	564.598
BVC	Both	Mat=-01	Pht=-15	Yld=140	Gpc=30	w(-1,-15,140,30)	GPC=0	0.903422	-7.98614	0.476747	1.17893e-16	185.633	0.859535	89.6165	77.117	5.1055	15.2405	564.598
BVC	Both	Mat=-01	Pht=-15	Yld=140	Gpc=40	w(-1,-15,140,40)	GPC=0	0.903422	-7.98614	0.476747	4.71572e-16	185.633	0.89353	89.6165	77.117	5.1055	15.2405	564.598
BVC	Both	Mat=-01	Pht=-15	Yld=140	Gpc=50	w(-1,-15,140,50)	GPC=0	0.903422	-7.98614	0.476747	4.71572e-16	185.633	0.922012	89.6165	77.117	5.1055	15.2405	564.598
BVC	Both	Mat=-01	Pht=-15	Yld=140	Gpc=60	w(-1,-15,140,60)	GPC=0	0.903422	-7.98614	0.476747	-2.35786e-16	185.633	0.942816	89.6165	77.117	5.1055	15.2405	564.598
BVC	Both	Mat=-01	Pht=-15	Yld=140	Gpc=70	w(-1,-15,140,70)	GPC=0	0.903422	-7.98614	0.476747	0	185.633	0.954118	89.6165	77.117	5.1055	15.2405	564.598
BVC	Both	Mat=-01	Pht=-15	Yld=140	Gpc=80	w(-1,-15,140,80)	GPC=0	0.903422	-7.98614	0.476747	1.17893e-16	185.633	0.954833	89.6165	77.117	5.1055	15.2405	564.598
BVC	Both	Mat=-01	Pht=-15	Yld=150	Gpc=01	w(-1,-15,150,1)	GPC=0	0.931739	-7.891	0.486789	2.29821e-16	190.452	0.74538	89.6165	77.117	5.1055	15.2405	648.46
BVC	Both	Mat=-01	Pht=-15	Yld=150	Gpc=10	w(-1,-15,150,10)	GPC=0	0.931739	-7.891	0.486789	-2.29821e-16	190.452	0.779606	89.6165	77.117	5.1055	15.2405	648.46
BVC	Both	Mat=-01	Pht=-15	Yld=150	Gpc=20	w(-1,-15,150,20)	GPC=0	0.931739	-7.891	0.486789	-2.29821e-16	190.452	0.817586	89.6165	77.117	5.1055	15.2405	648.46
BVC	Both	Mat=-01	Pht=-15	Yld=150	Gpc=30	w(-1,-15,150,30)	GPC=0	0.931739	-7.891	0.486789	-2.29821e-16	190.452	0.854265	89.6165	77.117	5.1055	15.2405	648.46
BVC	Both	Mat=-01	Pht=-15	Yld=150	Gpc=40	w(-1,-15,150,40)	GPC=0	0.931739	-7.891	0.486789	2.29821e-16	190.452	0.887988	89.6165	77.117	5.1055	15.2405	648.46
BVC	Both	Mat=-01	Pht=-15	Yld=150	Gpc=50	w(-1,-15,150,50)	GPC=0	0.931739	-7.891	0.486789	2.29821e-16	190.452	0.916815	89.6165	77.117	5.1055	15.2405	648.46
BVC	Both	Mat=-01	Pht=-15	Yld=150	Gpc=60	w(-1,-15,150,60)	GPC=0	0.931739	-7.891	0.486789	2.29821e-16	190.452	0.938725	89.6165	77.117	5.1055	15.2405	648.46
BVC	Both	Mat=-01	Pht=-15	Yld=150	Gpc=70	w(-1,-15,150,70)	GPC=0	0.931739	-7.891	0.486789	-1.1491e-16	190.452	0.951938	89.6165	77.117	5.1055	15.2405	648.46
BVC	Both	Mat=-01	Pht=-15	Yld=150	Gpc=80	w(-1,-15,150,80)	GPC=0	0.931739	-7.891	0.486789	-2.29821e-16	190.452	0.955266	89.6165	77.117	5.1055	15.2405	648.46
BVC	Both	Mat=-05	Pht=-01	Yld=001	Gpc=01	w(-5,-1,1,1)	GPC=0	-3.66471	-3.10456	-0.113348	0	21.3147	0.871657	84.529	83.1335	4.555	14.6755	-519.129
BVC	Both	Mat=-05	Pht=-01	Yld=001	Gpc=10	w(-5,-1,1,10)	GPC=0	-3.66471	-3.10456	-0.113348	-2.56687e-16	21.3147	0.585059	84.529	83.1335	4.555	14.6755	-519.129
BVC	Both	Mat=-05	Pht=-01	Yld=001	Gpc=20	w(-5,-1,1,20)	GPC=0	-3.66471	-3.10456	-0.113348	-5.13375e-16	21.3147	0.392365	84.529	83.1335	4.555	14.6755	-519.129
BVC	Both	Mat=-05	Pht=-01	Yld=001	Gpc=30	w(-5,-1,1,30)	GPC=0	-3.66471	-3.10456	-0.113348	-7.70062e-16	21.3147	0.289225	84.529	83.1335	4.555	14.6755	-519.129
BVC	Both	Mat=-05	Pht=-01	Yld=001	Gpc=40	w(-5,-1,1,40)	GPC=0	-3.66471	-3.10456	-0.113348	-1.28344e-15	21.3147	0.227638	84.529	83.1335	4.555	14.6755	-519.129
BVC	Both	Mat=-05	Pht=-01	Yld=001	Gpc=50	w(-5,-1,1,50)	GPC=0	-3.66471	-3.10456	-0.113348	-1.28344e-16	21.3147	0.187232	84.529	83.1335	4.555	14.6755	-519.129
BVC	Both	Mat=-05	Pht=-01	Yld=001	Gpc=60	w(-5,-1,1,60)	GPC=0	-3.66471	-3.10456	-0.113348	-1.79681e-15	21.3147	0.158832	84.529	83.1335	4.555	14.6755	-519.129
BVC	Both	Mat=-05	Pht=-01	Yld=001	Gpc=70	w(-5,-1,1,70)	GPC=0	-3.66471	-3.10456	-0.113348	-1.28344e-16	21.3147	0.137834	84.529	83.1335	4.555	14.6755	-519.129
BVC	Both	Mat=-05	Pht=-01	Yld=001	Gpc=80	w(-5,-1,1,80)	GPC=0	-3.66471	-3.10456	-0.113348	-3.85031e-16	21.3147	0.121699	84.529	83.1335	4.555	14.6755	-519.129
BVC	Both	Mat=-05	Pht=-01	Yld=010	Gpc=01	w(-5,-1,10,1)	GPC=0	-3.28734	-4.00587	0.0650759	-6.48454e-17	21.0933	0.925442	85.177	81.008	4.7765	14.6625	-448.613
BVC	Both	Mat=-05	Pht=-01	Yld=010	Gpc=10	w(-5,-1,10,10)	GPC=0	-3.28734	-4.00587	0.0650759	-1.29691e-16	21.0933	0.645083	85.177	81.008	4.7765	14.6625	-448.613
BVC	Both	Mat=-05	Pht=-01	Yld=010	Gpc=20	w(-5,-1,10,20)	GPC=0	-3.28734	-4.00587	0.0650759	2.59382e-16	21.0933	0.422424	85.177	81.008	4.7765	14.6625	-448.613
BVC	Both	Mat=-05	Pht=-01	Yld=010	Gpc=30	w(-5,-1,10,30)	GPC=0	-3.28734	-4.00587	0.0650759	3.24227e-16	21.0933	0.305289	85.177	81.008	4.7765	14.6625	-448.613
BVC	Both	Mat=-05	Pht=-01	Yld=010	Gpc=40	w(-5,-1,10,40)	GPC=0	-3.28734	-4.00587	0.0650759	-9.07836e-16	21.0933	0.23716	85.177	81.008	4.7765	14.6625	-448.613
BVC	Both	Mat=-05	Pht=-01	Yld=010	Gpc=50	w(-5,-1,10,50)	GPC=0	-3.28734	-4.00587	0.0650759	1.94536e-16	21.0933	0.193334	85.177	81.008	4.7765	14.6625	-448.613
BVC	Both	Mat=-05	Pht=-01	Yld=010	Gpc=60	w(-5,-1,10,60)	GPC=0	-3.28734	-4.00587	0.0650759	-1.4266e-15	21.0933	0.162968	85.177	81.008	4.7765	14.6625	-448.613
BVC	Both	Mat=-05	Pht=-01	Yld=010	Gpc=70	w(-5,-1,10,70)	GPC=0	-3.28734	-4.00587	0.0650759	-1.29691e-16	21.0933	0.140753	85.177	81.008	4.7765	14.6625	-448.613
BVC	Both	Mat=-05	Pht=-01	Yld=010	Gpc=80	w(-5,-1,10,80)	GPC=0	-3.28734	-4.00587	0.0650759	-2.07505e-15	21.0933	0.123822	85.177	81.008	4.7765	14.6625	-448.613
BVC	Both	Mat=-05	Pht=-01	Yld=020	Gpc=01	w(-5,-1,20,1)	GPC=0	-2.6274	-4.62291	0.246109	3.6182e-16	22.6821	0.942926	85.233	81.678	4.8765	14.911	-368.422
BVC	Both	Mat=-05	Pht=-01	Yld=020	Gpc=10	w(-5,-1,20,10)	GPC=0	-2.6274	-4.62291	0.246109	-2.71365e-16	22.6821	0.744275	85.233	81.678	4.8765	14.911	-368.422
BVC	Both	Mat=-05	Pht=-01	Yld=020	Gpc=20	w(-5,-1,20,20)	GPC=0	-2.6274	-4.62291	0.246109	-4.82426e-16	22.6821	0.491329	85.233	81.678	4.8765	14.911	-368.422
BVC	Both	Mat=-05	Pht=-01	Yld=020	Gpc=30	w(-5,-1,20,30)	GPC=0	-2.6274	-4.62291	0.246109	-6.63336e-16	22.6821	0.350415	85.233	81.678	4.8765	14.911	-368.422
BVC	Both	Mat=-05	Pht=-01	Yld=020	Gpc=40	w(-5,-1,20,40)	GPC=0	-2.6274	-4.62291	0.246109	-8.44246e-16	22.6821	0.269096	85.233	81.678	4.8765	14.911	-368.422
BVC	Both	Mat=-05	Pht=-01	Yld=020	Gpc=50	w(-5,-1,20,50)	GPC=0	-2.6274	-4.62291	0.246109	-1.14576e-15	22.6821	0.217495	85.233	81.678	4.8765	14.911	-368.422
BVC	Both	Mat=-05	Pht=-01	Yld=020	Gpc=60	w(-5,-1,20,60)	GPC=0	-2.6274	-4.62291	0.246109	-1.26637e-15	22.6821	0.182167	85.233	81.678	4.8765	14.911	-368.422
BVC	Both	Mat=-05	Pht=-01	Yld=020	Gpc=70	w(-5,-1,20,70)	GPC=0	-2.6274	-4.62291	0.246109	-1.8091e-15	22.6821	0.156569	85.233	81.678	4.8765	14.911	-368.422
BVC	Both	Mat=-05	Pht=-01	Yld=020	Gpc=80	w(-5,-1,20,80)	GPC=0	-2.6274	-4.62291	0.246109	-1.7488e-15	22.6821	0.13721	85.233	81.678	4.8765	14.911	-368.422
BVC	Both	Mat=-05	Pht=-01	Yld=030	Gpc=01	w(-5,-1,30,1)	GPC=0	-1.9284	-4.84402	0.378797	0	25.8499	0.918664	86.2495	81.6655	5.0975	14.9595	-286.513
BVC	Both	Mat=-05	Pht=-01	Yld=030	Gpc=10	w(-5,-1,30,10)	GPC=0	-1.9284	-4.84402	0.378797	-4.62992e-17	25.8499	0.842101	86.2495	81.6655	5.0975	14.9595	-286.513
BVC	Both	Mat=-05	Pht=-01	Yld=030	Gpc=20	w(-5,-1,30,20)	GPC=0	-1.9284	-4.84402	0.378797	5.29133e-16	25.8499	0.589484	86.2495	81.6655	5.0975	14.9595	-286.513
BVC	Both	Mat=-05	Pht=-01	Yld=030	Gpc=30	w(-5,-1,30,30)	GPC=0	-1.9284	-4.84402	0.378797	-3.50551e-16	25.8499	0.421571	86.2495	81.6655	5.0975	14.9595	-286.513
BVC	Both	Mat=-05	Pht=-01	Yld=030	Gpc=40	w(-5,-1,30,40)	GPC=0	-1.9284	-4.84402	0.378797	-1.05827e-16	25.8499	0.321792	86.2495	81.6655	5.0975	14.9595	-286.513
BVC	Both	Mat=-05	Pht=-01	Yld=030	Gpc=50	w(-5,-1,30,50)	GPC=0	-1.9284	-4.84402	0.378797	3.1748e-16	25.8499	0.258467	86.2495	81.6655	5.0975	14.9595	-286.513
BVC	Both	Mat=-05	Pht=-01	Yld=030	Gpc=60	w(-5,-1,30,60)	GPC=0	-1.9284	-4.84402	0.378797	3.1748e-16	25.8499	0.215355	86.2495	81.6655	5.0975	14.9595	-286.513
BVC	Both	Mat=-05	Pht=-01	Yld=030	Gpc=70	w(-5,-1,30,70)	GPC=0	-1.9284	-4.84402	0.378797	-1.17071e-15	25.8499	0.184313	86.2495	81.6655	5.0975	14.9595	-286.513
BVC	Both	Mat=-05	Pht=-01	Yld=030	Gpc=80	w(-5,-1,30,80)	GPC=0	-1.9284	-4.84402	0.378797	-1.4022e-15	25.8499	0.160971	86.2495	81.6655	5.0975	14.9595	-286.513
BVC	Both	Mat=-05	Pht=-01	Yld=040	Gpc=01	w(-5,-1,40,1)	GPC=0	-1.33223	-4.83609	0.465129	-1.81754e-16	30.1024	0.884247	86.934	81.488	5.174	15.1	-203.171
BVC	Both	Mat=-05	Pht=-01	Yld=040	Gpc=10	w(-5,-1,40,10)	GPC=0	-1.33223	-4.83609	0.465129	6.36139e-16	30.1024	0.903581	86.934	81.488	5.174	15.1	-203.171
BVC	Both	Mat=-05	Pht=-01	Yld=040	Gpc=20	w(-5,-1,40,20)	GPC=0	-1.33223	-4.83609	0.465129	-3.18069e-16	30.1024	0.696341	86.934	81.488	5.174	15.1	-203.171
BVC	Both	Mat=-05	Pht=-01	Yld=040	Gpc=30	w(-5,-1,40,30)	GPC=0	-1.33223	-4.83609	0.465129	-2.72631e-16	30.1024	0.509994	86.934	81.488	5.174	15.1	-203.171
BVC	Both	Mat=-05	Pht=-01	Yld=040	Gpc=40	w(-5,-1,40,40)	GPC=0	-1.33223	-4.83609	0.465129	9.0877e-17	30.1024	0.390074	86.934	81.488	5.174	15.1	-203.171
BVC	Both	Mat=-05	Pht=-01	Yld=040	Gpc=50	w(-5,-1,40,50)	GPC=0	-1.33223	-4.83609	0.465129	0	30.1024	0.312433	86.934	81.488	5.174	15.1	-203.171
BVC	Both	Mat=-05	Pht=-01	Yld=040	Gpc=60	w(-5,-1,40,60)	GPC=0	-1.33223	-4.83609	0.465129	-9.54208e-16	30.1024	0.259398	86.934	81.488	5.174	15.1	-203.171
BVC	Both	Mat=-05	Pht=-01	Yld=040	Gpc=70	w(-5,-1,40,70)	GPC=0	-1.33223	-4.83609	0.465129	3.63508e-16	30.1024	0.221275	86.934	81.488	5.174	15.1	-203.171
BVC	Both	Mat=-05	Pht=-01	Yld=040	Gpc=80	w(-5,-1,40,80)	GPC=0	-1.33223	-4.83609	0.465129	-1.45403e-15	30.1024	0.192697	86.934	81.488	5.174	15.1	-203.171
BVC	Both	Mat=-05	Pht=-01	Yld=050	Gpc=01	w(-5,-1,50,1)	GPC=0	-0.866192	-4.73476	0.519622	-7.8056e-17	35.0468	0.855039	88.274	82.237	5.408	14.7655	-118.691
BVC	Both	Mat=-05	Pht=-01	Yld=050	Gpc=10	w(-5,-1,50,10)	GPC=0	-0.866192	-4.73476	0.519622	0	35.0468	0.926331	88.274	82.237	5.408	14.7655	-118.691
BVC	Both	Mat=-05	Pht=-01	Yld=050	Gpc=20	w(-5,-1,50,20)	GPC=0	-0.866192	-4.73476	0.519622	-2.34168e-16	35.0468	0.789902	88.274	82.237	5.408	14.7655	-118.691
BVC	Both	Mat=-05	Pht=-01	Yld=050	Gpc=30	w(-5,-1,50,30)	GPC=0	-0.866192	-4.73476	0.519622	0	35.0468	0.604437	88.274	82.237	5.408	14.7655	-118.691
BVC	Both	Mat=-05	Pht=-01	Yld=050	Gpc=40	w(-5,-1,50,40)	GPC=0	-0.866192	-4.73476	0.519622	-1.56112e-16	35.0468	0.467847	88.274	82.237	5.408	14.7655	-118.691
BVC	Both	Mat=-05	Pht=-01	Yld=050	Gpc=50	w(-5,-1,50,50)	GPC=0	-0.866192	-4.73476	0.519622	-7.02504e-16	35.0468	0.375363	88.274	82.237	5.408	14.7655	-118.691
BVC	Both	Mat=-05	Pht=-01	Yld=050	Gpc=60	w(-5,-1,50,60)	GPC=0	-0.866192	-4.73476	0.519622	-1.56112e-16	35.0468	0.311239	88.274	82.237	5.408	14.7655	-118.691
BVC	Both	Mat=-05	Pht=-01	Yld=050	Gpc=70	w(-5,-1,50,70)	GPC=0	-0.866192	-4.73476	0.519622	0	35.0468	0.264944	88.274	82.237	5.408	14.7655	-118.691
BVC	Both	Mat=-05	Pht=-01	Yld=050	Gpc=80	w(-5,-1,50,80)	GPC=0	-0.866192	-4.73476	0.519622	-1.2489e-15	35.0468	0.230229	88.274	82.237	5.408	14.7655	-118.691
BVC	Both	Mat=-05	Pht=-01	Yld=060	Gpc=01	w(-5,-1,60,1)	GPC=0	-0.509801	-4.60791	0.554554	4.05976e-16	40.4301	0.833088	88.617	81.8105	5.4285	14.765	-33.5352
BVC	Both	Mat=-05	Pht=-01	Yld=060	Gpc=10	w(-5,-1,60,10)	GPC=0	-0.509801	-4.60791	0.554554	1.35325e-16	40.4301	0.925835	88.617	81.8105	5.4285	14.765	-33.5352
BVC	Both	Mat=-05	Pht=-01	Yld=060	Gpc=20	w(-5,-1,60,20)	GPC=0	-0.509801	-4.60791	0.554554	2.70651e-16	40.4301	0.857626	88.617	81.8105	5.4285	14.765	-33.5352
BVC	Both	Mat=-05	Pht=-01	Yld=060	Gpc=30	w(-5,-1,60,30)	GPC=0	-0.509801	-4.60791	0.554554	0	40.4301	0.693983	88.617	81.8105	5.4285	14.765	-33.5352
BVC	Both	Mat=-05	Pht=-01	Yld=060	Gpc=40	w(-5,-1,60,40)	GPC=0	-0.509801	-4.60791	0.554554	4.05976e-16	40.4301	0.549073	88.617	81.8105	5.4285	14.765	-33.5352
BVC	Both	Mat=-05	Pht=-01	Yld=060	Gpc=50	w(-5,-1,60,50)	GPC=0	-0.509801	-4.60791	0.554554	-2.70651e-16	40.4301	0.443617	88.617	81.8105	5.4285	14.765	-33.5352
BVC	Both	Mat=-05	Pht=-01	Yld=060	Gpc=60	w(-5,-1,60,60)	GPC=0	-0.509801	-4.60791	0.554554	-5.41302e-16	40.4301	0.368363	88.617	81.8105	5.4285	14.765	-33.5352
BVC	Both	Mat=-05	Pht=-01	Yld=060	Gpc=70	w(-5,-1,60,70)	GPC=0	-0.509801	-4.60791	0.554554	2.70651e-16	40.4301	0.313393	88.617	81.8105	5.4285	14.765	-33.5352
BVC	Both	Mat=-05	Pht=-01	Yld=060	Gpc=80	w(-5,-1,60,80)	GPC=0	-0.509801	-4.60791	0.554554	-9.47278e-16	40.4301	0.271988	88.617	81.8105	5.4285	14.765	-33.5352
BVC	Both	Mat=-05	Pht=-01	Yld=070	Gpc=01	w(-5,-1,70,1)	GPC=0	-0.235698	-4.48295	0.577677	1.18685e-16	46.0989	0.816921	88.9175	81.7	5.4385	14.8075	51.7797
BVC	Both	Mat=-05	Pht=-01	Yld=070	Gpc=10	w(-5,-1,70,10)	GPC=0	-0.235698	-4.48295	0.577677	-1.18685e-16	46.0989	0.915315	88.9175	81.7	5.4385	14.8075	51.7797
BVC	Both	Mat=-05	Pht=-01	Yld=070	Gpc=20	w(-5,-1,70,20)	GPC=0	-0.235698	-4.48295	0.577677	0	46.0989	0.898875	88.9175	81.7	5.4385	14.8075	51.7797
BVC	Both	Mat=-05	Pht=-01	Yld=070	Gpc=30	w(-5,-1,70,30)	GPC=0	-0.235698	-4.48295	0.577677	-2.37369e-16	46.0989	0.770454	88.9175	81.7	5.4385	14.8075	51.7797
BVC	Both	Mat=-05	Pht=-01	Yld=070	Gpc=40	w(-5,-1,70,40)	GPC=0	-0.235698	-4.48295	0.577677	0	46.0989	0.628131	88.9175	81.7	5.4385	14.8075	51.7797
BVC	Both	Mat=-05	Pht=-01	Yld=070	Gpc=50	w(-5,-1,70,50)	GPC=0	-0.235698	-4.48295	0.577677	-2.37369e-16	46.0989	0.513845	88.9175	81.7	5.4385	14.8075	51.7797
BVC	Both	Mat=-05	Pht=-01	Yld=070	Gpc=60	w(-5,-1,70,60)	GPC=0	-0.235698	-4.48295	0.577677	-8.30792e-16	46.0989	0.428624	88.9175	81.7	5.4385	14.8075	51.7797
BVC	Both	Mat=-05	Pht=-01	Yld=070	Gpc=70	w(-5,-1,70,70)	GPC=0	-0.235698	-4.48295	0.577677	2.37369e-16	46.0989	0.365106	88.9175	81.7	5.4385	14.8075	51.7797
BVC	Both	Mat=-05	Pht=-01	Yld=070	Gpc=80	w(-5,-1,70,80)	GPC=0	-0.235698	-4.48295	0.577677	2.37369e-16	46.0989	0.316809	88.9175	81.7	5.4385	14.8075	51.7797
BVC	Both	Mat=-05	Pht=-01	Yld=080	Gpc=01	w(-5,-1,80,1)	GPC=0	-0.0215453	-4.36914	0.593535	2.10595e-16	51.9597	0.804876	88.9175	81.7	5.4385	14.8075	137.281
BVC	Both	Mat=-05	Pht=-01	Yld=080	Gpc=10	w(-5,-1,80,10)	GPC=0	-0.0215453	-4.36914	0.593535	0	51.9597	0.901762	88.9175	81.7	5.4385	14.8075	137.281
BVC	Both	Mat=-05	Pht=-01	Yld=080	Gpc=20	w(-5,-1,80,20)	GPC=0	-0.0215453	-4.36914	0.593535	-2.10595e-16	51.9597	0.919683	88.9175	81.7	5.4385	14.8075	137.281
BVC	Both	Mat=-05	Pht=-01	Yld=080	Gpc=30	w(-5,-1,80,30)	GPC=0	-0.0215453	-4.36914	0.593535	2.10595e-16	51.9597	0.829888	88.9175	81.7	5.4385	14.8075	137.281
BVC	Both	Mat=-05	Pht=-01	Yld=080	Gpc=40	w(-5,-1,80,40)	GPC=0	-0.0215453	-4.36914	0.593535	4.2119e-16	51.9597	0.700342	88.9175	81.7	5.4385	14.8075	137.281
BVC	Both	Mat=-05	Pht=-01	Yld=080	Gpc=50	w(-5,-1,80,50)	GPC=0	-0.0215453	-4.36914	0.593535	-2.10595e-16	51.9597	0.582932	88.9175	81.7	5.4385	14.8075	137.281
BVC	Both	Mat=-05	Pht=-01	Yld=080	Gpc=60	w(-5,-1,80,60)	GPC=0	-0.0215453	-4.36914	0.593535	-2.10595e-16	51.9597	0.490057	88.9175	81.7	5.4385	14.8075	137.281
BVC	Both	Mat=-05	Pht=-01	Yld=080	Gpc=70	w(-5,-1,80,70)	GPC=0	-0.0215453	-4.36914	0.593535	-2.10595e-16	51.9597	0.418771	88.9175	81.7	5.4385	14.8075	137.281
BVC	Both	Mat=-05	Pht=-01	Yld=080	Gpc=80	w(-5,-1,80,80)	GPC=0	-0.0215453	-4.36914	0.593535	-4.2119e-16	51.9597	0.363751	88.9175	81.7	5.4385	14.8075	137.281
BVC	Both	Mat=-05	Pht=-01	Yld=090	Gpc=01	w(-5,-1,90,1)	GPC=0	0.148849	-4.26852	0.604778	1.88812e-16	57.9543	0.795716	88.9175	81.7	5.4385	14.8075	222.783
BVC	Both	Mat=-05	Pht=-01	Yld=090	Gpc=10	w(-5,-1,90,10)	GPC=0	0.148849	-4.26852	0.604778	1.88812e-16	57.9543	0.88818	88.9175	81.7	5.4385	14.8075	222.783
BVC	Both	Mat=-05	Pht=-01	Yld=090	Gpc=20	w(-5,-1,90,20)	GPC=0	0.148849	-4.26852	0.604778	3.77623e-16	57.9543	0.927091	88.9175	81.7	5.4385	14.8075	222.783
BVC	Both	Mat=-05	Pht=-01	Yld=090	Gpc=30	w(-5,-1,90,30)	GPC=0	0.148849	-4.26852	0.604778	-1.88812e-16	57.9543	0.872297	88.9175	81.7	5.4385	14.8075	222.783
BVC	Both	Mat=-05	Pht=-01	Yld=090	Gpc=40	w(-5,-1,90,40)	GPC=0	0.148849	-4.26852	0.604778	-1.88812e-16	57.9543	0.76251	88.9175	81.7	5.4385	14.8075	222.783
BVC	Both	Mat=-05	Pht=-01	Yld=090	Gpc=50	w(-5,-1,90,50)	GPC=0	0.148849	-4.26852	0.604778	-3.77623e-16	57.9543	0.648129	88.9175	81.7	5.4385	14.8075	222.783
BVC	Both	Mat=-05	Pht=-01	Yld=090	Gpc=60	w(-5,-1,90,60)	GPC=0	0.148849	-4.26852	0.604778	-3.77623e-16	57.9543	0.550806	88.9175	81.7	5.4385	14.8075	222.783
BVC	Both	Mat=-05	Pht=-01	Yld=090	Gpc=70	w(-5,-1,90,70)	GPC=0	0.148849	-4.26852	0.604778	3.77623e-16	57.9543	0.473163	88.9175	81.7	5.4385	14.8075	222.783
BVC	Both	Mat=-05	Pht=-01	Yld=090	Gpc=80	w(-5,-1,90,80)	GPC=0	0.148849	-4.26852	0.604778	0	57.9543	0.411972	88.9175	81.7	5.4385	14.8075	222.783
BVC	Both	Mat=-05	Pht=-01	Yld=100	Gpc=01	w(-5,-1,100,1)	GPC=0	0.286866	-4.18048	0.61299	-1.70855e-16	64.0452	0.788594	89.1685	81.572	5.444	14.8255	308.288
BVC	Both	Mat=-05	Pht=-01	Yld=100	Gpc=10	w(-5,-1,100,10)	GPC=0	0.286866	-4.18048	0.61299	1.70855e-16	64.0452	0.875673	89.1685	81.572	5.444	14.8255	308.288
BVC	Both	Mat=-05	Pht=-01	Yld=100	Gpc=20	w(-5,-1,100,20)	GPC=0	0.286866	-4.18048	0.61299	3.4171e-16	64.0452	0.926582	89.1685	81.572	5.444	14.8255	308.288
BVC	Both	Mat=-05	Pht=-01	Yld=100	Gpc=30	w(-5,-1,100,30)	GPC=0	0.286866	-4.18048	0.61299	-1.70855e-16	64.0452	0.900159	89.1685	81.572	5.444	14.8255	308.288
BVC	Both	Mat=-05	Pht=-01	Yld=100	Gpc=40	w(-5,-1,100,40)	GPC=0	0.286866	-4.18048	0.61299	0	64.0452	0.813179	89.1685	81.572	5.444	14.8255	308.288
BVC	Both	Mat=-05	Pht=-01	Yld=100	Gpc=50	w(-5,-1,100,50)	GPC=0	0.286866	-4.18048	0.61299	-1.70855e-16	64.0452	0.707258	89.1685	81.572	5.444	14.8255	308.288
BVC	Both	Mat=-05	Pht=-01	Yld=100	Gpc=60	w(-5,-1,100,60)	GPC=0	0.286866	-4.18048	0.61299	0	64.0452	0.60917	89.1685	81.572	5.444	14.8255	308.288
BVC	Both	Mat=-05	Pht=-01	Yld=100	Gpc=70	w(-5,-1,100,70)	GPC=0	0.286866	-4.18048	0.61299	-3.4171e-16	64.0452	0.527108	89.1685	81.572	5.444	14.8255	308.288
BVC	Both	Mat=-05	Pht=-01	Yld=100	Gpc=80	w(-5,-1,100,80)	GPC=0	0.286866	-4.18048	0.61299	-6.8342e-16	64.0452	0.460663	89.1685	81.572	5.444	14.8255	308.288
BVC	Both	Mat=-05	Pht=-01	Yld=110	Gpc=01	w(-5,-1,110,1)	GPC=0	0.400504	-4.10356	0.619148	1.55859e-16	70.2073	0.782941	89.1685	81.572	5.444	14.8255	393.9
BVC	Both	Mat=-05	Pht=-01	Yld=110	Gpc=10	w(-5,-1,110,10)	GPC=0	0.400504	-4.10356	0.619148	3.11718e-16	70.2073	0.864535	89.1685	81.572	5.444	14.8255	393.9
BVC	Both	Mat=-05	Pht=-01	Yld=110	Gpc=20	w(-5,-1,110,20)	GPC=0	0.400504	-4.10356	0.619148	0	70.2073	0.92176	89.1685	81.572	5.444	14.8255	393.9
BVC	Both	Mat=-05	Pht=-01	Yld=110	Gpc=30	w(-5,-1,110,30)	GPC=0	0.400504	-4.10356	0.619148	0	70.2073	0.916808	89.1685	81.572	5.444	14.8255	393.9
BVC	Both	Mat=-05	Pht=-01	Yld=110	Gpc=40	w(-5,-1,110,40)	GPC=0	0.400504	-4.10356	0.619148	-1.55859e-16	70.2073	0.852438	89.1685	81.572	5.444	14.8255	393.9
BVC	Both	Mat=-05	Pht=-01	Yld=110	Gpc=50	w(-5,-1,110,50)	GPC=0	0.400504	-4.10356	0.619148	1.55859e-16	70.2073	0.758894	89.1685	81.572	5.444	14.8255	393.9
BVC	Both	Mat=-05	Pht=-01	Yld=110	Gpc=60	w(-5,-1,110,60)	GPC=0	0.400504	-4.10356	0.619148	1.55859e-16	70.2073	0.663688	89.1685	81.572	5.444	14.8255	393.9
BVC	Both	Mat=-05	Pht=-01	Yld=110	Gpc=70	w(-5,-1,110,70)	GPC=0	0.400504	-4.10356	0.619148	-3.11718e-16	70.2073	0.579494	89.1685	81.572	5.444	14.8255	393.9
BVC	Both	Mat=-05	Pht=-01	Yld=110	Gpc=80	w(-5,-1,110,80)	GPC=0	0.400504	-4.10356	0.619148	-6.23437e-16	70.2073	0.509042	89.1685	81.572	5.444	14.8255	393.9
BVC	Both	Mat=-05	Pht=-01	Yld=120	Gpc=01	w(-5,-1,120,1)	GPC=0	0.495453	-4.0362	0.62387	4.29546e-16	76.4234	0.77837	89.1685	81.572	5.444	14.8255	479.512
BVC	Both	Mat=-05	Pht=-01	Yld=120	Gpc=10	w(-5,-1,120,10)	GPC=0	0.495453	-4.0362	0.62387	5.72728e-16	76.4234	0.854742	89.1685	81.572	5.444	14.8255	479.512
BVC	Both	Mat=-05	Pht=-01	Yld=120	Gpc=20	w(-5,-1,120,20)	GPC=0	0.495453	-4.0362	0.62387	2.86364e-16	76.4234	0.914797	89.1685	81.572	5.444	14.8255	479.512
BVC	Both	Mat=-05	Pht=-01	Yld=120	Gpc=30	w(-5,-1,120,30)	GPC=0	0.495453	-4.0362	0.62387	2.86364e-16	76.4234	0.925395	89.1685	81.572	5.444	14.8255	479.512
BVC	Both	Mat=-05	Pht=-01	Yld=120	Gpc=40	w(-5,-1,120,40)	GPC=0	0.495453	-4.0362	0.62387	-1.43182e-16	76.4234	0.881431	89.1685	81.572	5.444	14.8255	479.512
BVC	Both	Mat=-05	Pht=-01	Yld=120	Gpc=50	w(-5,-1,120,50)	GPC=0	0.495453	-4.0362	0.62387	0	76.4234	0.80241	89.1685	81.572	5.444	14.8255	479.512
BVC	Both	Mat=-05	Pht=-01	Yld=120	Gpc=60	w(-5,-1,120,60)	GPC=0	0.495453	-4.0362	0.62387	-1.43182e-16	76.4234	0.713244	89.1685	81.572	5.444	14.8255	479.512
BVC	Both	Mat=-05	Pht=-01	Yld=120	Gpc=70	w(-5,-1,120,70)	GPC=0	0.495453	-4.0362	0.62387	2.86364e-16	76.4234	0.629325	89.1685	81.572	5.444	14.8255	479.512
BVC	Both	Mat=-05	Pht=-01	Yld=120	Gpc=80	w(-5,-1,120,80)	GPC=0	0.495453	-4.0362	0.62387	2.86364e-16	76.4234	0.556351	89.1685	81.572	5.444	14.8255	479.512
BVC	Both	Mat=-05	Pht=-01	Yld=130	Gpc=01	w(-5,-1,130,1)	GPC=0	0.575827	-3.97696	0.627565	0	82.6813	0.774611	89.1685	81.572	5.444	14.8255	565.124
BVC	Both	Mat=-05	Pht=-01	Yld=130	Gpc=10	w(-5,-1,130,10)	GPC=0	0.575827	-3.97696	0.627565	0	82.6813	0.846162	89.1685	81.572	5.444	14.8255	565.124
BVC	Both	Mat=-05	Pht=-01	Yld=130	Gpc=20	w(-5,-1,130,20)	GPC=0	0.575827	-3.97696	0.627565	0	82.6813	0.906947	89.1685	81.572	5.444	14.8255	565.124
BVC	Both	Mat=-05	Pht=-01	Yld=130	Gpc=30	w(-5,-1,130,30)	GPC=0	0.575827	-3.97696	0.627565	0	82.6813	0.92846	89.1685	81.572	5.444	14.8255	565.124
BVC	Both	Mat=-05	Pht=-01	Yld=130	Gpc=40	w(-5,-1,130,40)	GPC=0	0.575827	-3.97696	0.627565	2.6469e-16	82.6813	0.901814	89.1685	81.572	5.444	14.8255	565.124
BVC	Both	Mat=-05	Pht=-01	Yld=130	Gpc=50	w(-5,-1,130,50)	GPC=0	0.575827	-3.97696	0.627565	0	82.6813	0.837878	89.1685	81.572	5.444	14.8255	565.124	Selected at yield = 1
BVC	Both	Mat=-05	Pht=-01	Yld=130	Gpc=60	w(-5,-1,130,60)	GPC=0	0.575827	-3.97696	0.627565	2.6469e-16	82.6813	0.757122	89.1685	81.572	5.444	14.8255	565.124
BVC	Both	Mat=-05	Pht=-01	Yld=130	Gpc=70	w(-5,-1,130,70)	GPC=0	0.575827	-3.97696	0.627565	-5.2938e-16	82.6813	0.675767	89.1685	81.572	5.444	14.8255	565.124	Selected at GPC = 1
BVC	Both	Mat=-05	Pht=-01	Yld=130	Gpc=80	w(-5,-1,130,80)	GPC=0	0.575827	-3.97696	0.627565	-5.2938e-16	82.6813	0.601888	89.1685	81.572	5.444	14.8255	565.124
BVC	Both	Mat=-05	Pht=-01	Yld=140	Gpc=01	w(-5,-1,140,1)	GPC=0	0.644651	-3.9246	0.630506	2.45975e-16	88.9722	0.771476	89.1685	81.572	5.444	14.8255	650.736
BVC	Both	Mat=-05	Pht=-01	Yld=140	Gpc=10	w(-5,-1,140,10)	GPC=0	0.644651	-3.9246	0.630506	2.45975e-16	88.9722	0.838634	89.1685	81.572	5.444	14.8255	650.736
BVC	Both	Mat=-05	Pht=-01	Yld=140	Gpc=20	w(-5,-1,140,20)	GPC=0	0.644651	-3.9246	0.630506	2.45975e-16	88.9722	0.898903	89.1685	81.572	5.444	14.8255	650.736
BVC	Both	Mat=-05	Pht=-01	Yld=140	Gpc=30	w(-5,-1,140,30)	GPC=0	0.644651	-3.9246	0.630506	0	88.9722	0.927886	89.1685	81.572	5.444	14.8255	650.736
BVC	Both	Mat=-05	Pht=-01	Yld=140	Gpc=40	w(-5,-1,140,40)	GPC=0	0.644651	-3.9246	0.630506	0	88.9722	0.915339	89.1685	81.572	5.444	14.8255	650.736
BVC	Both	Mat=-05	Pht=-01	Yld=140	Gpc=50	w(-5,-1,140,50)	GPC=0	0.644651	-3.9246	0.630506	0	88.9722	0.865886	89.1685	81.572	5.444	14.8255	650.736
BVC	Both	Mat=-05	Pht=-01	Yld=140	Gpc=60	w(-5,-1,140,60)	GPC=0	0.644651	-3.9246	0.630506	0	88.9722	0.795015	89.1685	81.572	5.444	14.8255	650.736
BVC	Both	Mat=-05	Pht=-01	Yld=140	Gpc=70	w(-5,-1,140,70)	GPC=0	0.644651	-3.9246	0.630506	0	88.9722	0.718196	89.1685	81.572	5.444	14.8255	650.736
BVC	Both	Mat=-05	Pht=-01	Yld=140	Gpc=80	w(-5,-1,140,80)	GPC=0	0.644651	-3.9246	0.630506	0	88.9722	0.645035	89.1685	81.572	5.444	14.8255	650.736
BVC	Both	Mat=-05	Pht=-01	Yld=150	Gpc=01	w(-5,-1,150,1)	GPC=0	0.70419	-3.87809	0.632883	2.29667e-16	95.2895	0.768826	89.7645	81.324	5.491	14.6935	736.385
BVC	Both	Mat=-05	Pht=-01	Yld=150	Gpc=10	w(-5,-1,150,10)	GPC=0	0.70419	-3.87809	0.632883	0	95.2895	0.832008	89.7645	81.324	5.491	14.6935	736.385
BVC	Both	Mat=-05	Pht=-01	Yld=150	Gpc=20	w(-5,-1,150,20)	GPC=0	0.70419	-3.87809	0.632883	2.29667e-16	95.2895	0.89104	89.7645	81.324	5.491	14.6935	736.385
BVC	Both	Mat=-05	Pht=-01	Yld=150	Gpc=30	w(-5,-1,150,30)	GPC=0	0.70419	-3.87809	0.632883	0	95.2895	0.924995	89.7645	81.324	5.491	14.6935	736.385
BVC	Both	Mat=-05	Pht=-01	Yld=150	Gpc=40	w(-5,-1,150,40)	GPC=0	0.70419	-3.87809	0.632883	2.29667e-16	95.2895	0.923602	89.7645	81.324	5.491	14.6935	736.385
BVC	Both	Mat=-05	Pht=-01	Yld=150	Gpc=50	w(-5,-1,150,50)	GPC=0	0.70419	-3.87809	0.632883	1.75227e-16	95.2895	0.88732	89.7645	81.324	5.491	14.6935	736.385	Selected at yield = 1
BVC	Both	Mat=-05	Pht=-01	Yld=150	Gpc=60	w(-5,-1,150,60)	GPC=0	0.70419	-3.87809	0.632883	1.56079e-17	95.2895	0.826975	89.7645	81.324	5.491	14.6935	736.385
BVC	Both	Mat=-05	Pht=-01	Yld=150	Gpc=70	w(-5,-1,150,70)	GPC=0	0.70419	-3.87809	0.632883	2.45275e-16	95.2895	0.756219	89.7645	81.324	5.491	14.6935	736.385	Selected at GPC = 1
BVC	Both	Mat=-05	Pht=-01	Yld=150	Gpc=80	w(-5,-1,150,80)	GPC=0	0.70419	-3.87809	0.632883	1.75227e-16	95.2895	0.685288	89.7645	81.324	5.491	14.6935	736.385
BVC	Both	Mat=-05	Pht=-05	Yld=001	Gpc=01	w(-5,-5,1,1)	GPC=0	-1.37412	-8.1189	0.120376	0	47.5854	0.932526	87.487	76.755	4.7785	14.891	-664.695
BVC	Both	Mat=-05	Pht=-05	Yld=001	Gpc=10	w(-5,-5,1,10)	GPC=0	-1.37412	-8.1189	0.120376	1.14977e-16	47.5854	0.952667	87.487	76.755	4.7785	14.891	-664.695
BVC	Both	Mat=-05	Pht=-05	Yld=001	Gpc=20	w(-5,-5,1,20)	GPC=0	-1.37412	-8.1189	0.120376	0	47.5854	0.842866	87.487	76.755	4.7785	14.891	-664.695
BVC	Both	Mat=-05	Pht=-05	Yld=001	Gpc=30	w(-5,-5,1,30)	GPC=0	-1.37412	-8.1189	0.120376	-1.14977e-16	47.5854	0.691462	87.487	76.755	4.7785	14.891	-664.695
BVC	Both	Mat=-05	Pht=-05	Yld=001	Gpc=40	w(-5,-5,1,40)	GPC=0	-1.37412	-8.1189	0.120376	-2.29954e-16	47.5854	0.563116	87.487	76.755	4.7785	14.891	-664.695
BVC	Both	Mat=-05	Pht=-05	Yld=001	Gpc=50	w(-5,-5,1,50)	GPC=0	-1.37412	-8.1189	0.120376	-6.89861e-16	47.5854	0.466569	87.487	76.755	4.7785	14.891	-664.695
BVC	Both	Mat=-05	Pht=-05	Yld=001	Gpc=60	w(-5,-5,1,60)	GPC=0	-1.37412	-8.1189	0.120376	-6.89861e-16	47.5854	0.394912	87.487	76.755	4.7785	14.891	-664.695
BVC	Both	Mat=-05	Pht=-05	Yld=001	Gpc=70	w(-5,-5,1,70)	GPC=0	-1.37412	-8.1189	0.120376	1.14977e-16	47.5854	0.340828	87.487	76.755	4.7785	14.891	-664.695
BVC	Both	Mat=-05	Pht=-05	Yld=001	Gpc=80	w(-5,-5,1,80)	GPC=0	-1.37412	-8.1189	0.120376	-1.03479e-15	47.5854	0.299032	87.487	76.755	4.7785	14.891	-664.695
BVC	Both	Mat=-05	Pht=-05	Yld=010	Gpc=01	w(-5,-5,10,1)	GPC=0	-1.1553	-8.25749	0.194197	-1.11644e-16	49.0059	0.910675	87.4415	77.152	4.8475	15.0845	-591.971
BVC	Both	Mat=-05	Pht=-05	Yld=010	Gpc=10	w(-5,-5,10,10)	GPC=0	-1.1553	-8.25749	0.194197	1.11644e-16	49.0059	0.959749	87.4415	77.152	4.8475	15.0845	-591.971
BVC	Both	Mat=-05	Pht=-05	Yld=010	Gpc=20	w(-5,-5,10,20)	GPC=0	-1.1553	-8.25749	0.194197	5.58221e-17	49.0059	0.880166	87.4415	77.152	4.8475	15.0845	-591.971
BVC	Both	Mat=-05	Pht=-05	Yld=010	Gpc=30	w(-5,-5,10,30)	GPC=0	-1.1553	-8.25749	0.194197	-1.67466e-16	49.0059	0.734704	87.4415	77.152	4.8475	15.0845	-591.971
BVC	Both	Mat=-05	Pht=-05	Yld=010	Gpc=40	w(-5,-5,10,40)	GPC=0	-1.1553	-8.25749	0.194197	-3.34932e-16	49.0059	0.600751	87.4415	77.152	4.8475	15.0845	-591.971
BVC	Both	Mat=-05	Pht=-05	Yld=010	Gpc=50	w(-5,-5,10,50)	GPC=0	-1.1553	-8.25749	0.194197	-2.23288e-16	49.0059	0.497171	87.4415	77.152	4.8475	15.0845	-591.971
BVC	Both	Mat=-05	Pht=-05	Yld=010	Gpc=60	w(-5,-5,10,60)	GPC=0	-1.1553	-8.25749	0.194197	-2.23288e-16	49.0059	0.419702	87.4415	77.152	4.8475	15.0845	-591.971
BVC	Both	Mat=-05	Pht=-05	Yld=010	Gpc=70	w(-5,-5,10,70)	GPC=0	-1.1553	-8.25749	0.194197	-6.69865e-16	49.0059	0.3612	87.4415	77.152	4.8475	15.0845	-591.971
BVC	Both	Mat=-05	Pht=-05	Yld=010	Gpc=80	w(-5,-5,10,80)	GPC=0	-1.1553	-8.25749	0.194197	-8.37331e-16	49.0059	0.316081	87.4415	77.152	4.8475	15.0845	-591.971
BVC	Both	Mat=-05	Pht=-05	Yld=020	Gpc=01	w(-5,-5,20,1)	GPC=0	-0.913257	-8.28145	0.267453	1.59907e-16	51.3226	0.884552	87.5455	77.524	4.9265	15.226	-510.131
BVC	Both	Mat=-05	Pht=-05	Yld=020	Gpc=10	w(-5,-5,20,10)	GPC=0	-0.913257	-8.28145	0.267453	0	51.3226	0.956626	87.5455	77.524	4.9265	15.226	-510.131
BVC	Both	Mat=-05	Pht=-05	Yld=020	Gpc=20	w(-5,-5,20,20)	GPC=0	-0.913257	-8.28145	0.267453	1.59907e-16	51.3226	0.914534	87.5455	77.524	4.9265	15.226	-510.131
BVC	Both	Mat=-05	Pht=-05	Yld=020	Gpc=30	w(-5,-5,20,30)	GPC=0	-0.913257	-8.28145	0.267453	1.06605e-16	51.3226	0.784799	87.5455	77.524	4.9265	15.226	-510.131
BVC	Both	Mat=-05	Pht=-05	Yld=020	Gpc=40	w(-5,-5,20,40)	GPC=0	-0.913257	-8.28145	0.267453	-1.33256e-16	51.3226	0.648659	87.5455	77.524	4.9265	15.226	-510.131
BVC	Both	Mat=-05	Pht=-05	Yld=020	Gpc=50	w(-5,-5,20,50)	GPC=0	-0.913257	-8.28145	0.267453	2.13209e-16	51.3226	0.538009	87.5455	77.524	4.9265	15.226	-510.131
BVC	Both	Mat=-05	Pht=-05	Yld=020	Gpc=60	w(-5,-5,20,60)	GPC=0	-0.913257	-8.28145	0.267453	-1.06605e-16	51.3226	0.453704	87.5455	77.524	4.9265	15.226	-510.131
BVC	Both	Mat=-05	Pht=-05	Yld=020	Gpc=70	w(-5,-5,20,70)	GPC=0	-0.913257	-8.28145	0.267453	-1.06605e-16	51.3226	0.389656	87.5455	77.524	4.9265	15.226	-510.131
BVC	Both	Mat=-05	Pht=-05	Yld=020	Gpc=80	w(-5,-5,20,80)	GPC=0	-0.913257	-8.28145	0.267453	-7.72883e-16	51.3226	0.340215	87.5455	77.524	4.9265	15.226	-510.131
BVC	Both	Mat=-05	Pht=-05	Yld=030	Gpc=01	w(-5,-5,30,1)	GPC=0	-0.68345	-8.19934	0.330193	6.92468e-17	54.3197	0.859831	88.032	77.638	5.024	15.2845	-427.416
BVC	Both	Mat=-05	Pht=-05	Yld=030	Gpc=10	w(-5,-5,30,10)	GPC=0	-0.68345	-8.19934	0.330193	0	54.3197	0.945109	88.032	77.638	5.024	15.2845	-427.416
BVC	Both	Mat=-05	Pht=-05	Yld=030	Gpc=20	w(-5,-5,30,20)	GPC=0	-0.68345	-8.19934	0.330193	-1.38494e-16	54.3197	0.938137	88.032	77.638	5.024	15.2845	-427.416
BVC	Both	Mat=-05	Pht=-05	Yld=030	Gpc=30	w(-5,-5,30,30)	GPC=0	-0.68345	-8.19934	0.330193	-2.01445e-16	54.3197	0.832431	88.032	77.638	5.024	15.2845	-427.416
BVC	Both	Mat=-05	Pht=-05	Yld=030	Gpc=40	w(-5,-5,30,40)	GPC=0	-0.68345	-8.19934	0.330193	-2.39216e-16	54.3197	0.700104	88.032	77.638	5.024	15.2845	-427.416
BVC	Both	Mat=-05	Pht=-05	Yld=030	Gpc=50	w(-5,-5,30,50)	GPC=0	-0.68345	-8.19934	0.330193	2.01445e-16	54.3197	0.584457	88.032	77.638	5.024	15.2845	-427.416
BVC	Both	Mat=-05	Pht=-05	Yld=030	Gpc=60	w(-5,-5,30,60)	GPC=0	-0.68345	-8.19934	0.330193	0	54.3197	0.493567	88.032	77.638	5.024	15.2845	-427.416
BVC	Both	Mat=-05	Pht=-05	Yld=030	Gpc=70	w(-5,-5,30,70)	GPC=0	-0.68345	-8.19934	0.330193	0	54.3197	0.423615	88.032	77.638	5.024	15.2845	-427.416
BVC	Both	Mat=-05	Pht=-05	Yld=030	Gpc=80	w(-5,-5,30,80)	GPC=0	-0.68345	-8.19934	0.330193	-9.06503e-16	54.3197	0.369347	88.032	77.638	5.024	15.2845	-427.416
BVC	Both	Mat=-05	Pht=-05	Yld=040	Gpc=01	w(-5,-5,40,1)	GPC=0	-0.472933	-8.04513	0.382535	2.59897e-16	57.8917	0.838245	88.104	77.7025	5.0325	15.3075	-344.241
BVC	Both	Mat=-05	Pht=-05	Yld=040	Gpc=10	w(-5,-5,40,10)	GPC=0	-0.472933	-8.04513	0.382535	7.08809e-17	57.8917	0.929111	88.104	77.7025	5.0325	15.3075	-344.241
BVC	Both	Mat=-05	Pht=-05	Yld=040	Gpc=20	w(-5,-5,40,20)	GPC=0	-0.472933	-8.04513	0.382535	-4.72539e-17	57.8917	0.950464	88.104	77.7025	5.0325	15.3075	-344.241
BVC	Both	Mat=-05	Pht=-05	Yld=040	Gpc=30	w(-5,-5,40,30)	GPC=0	-0.472933	-8.04513	0.382535	0	57.8917	0.87338	88.104	77.7025	5.0325	15.3075	-344.241
BVC	Both	Mat=-05	Pht=-05	Yld=040	Gpc=40	w(-5,-5,40,40)	GPC=0	-0.472933	-8.04513	0.382535	-2.3627e-17	57.8917	0.751545	88.104	77.7025	5.0325	15.3075	-344.241
BVC	Both	Mat=-05	Pht=-05	Yld=040	Gpc=50	w(-5,-5,40,50)	GPC=0	-0.472933	-8.04513	0.382535	1.89016e-16	57.8917	0.634302	88.104	77.7025	5.0325	15.3075	-344.241
BVC	Both	Mat=-05	Pht=-05	Yld=040	Gpc=60	w(-5,-5,40,60)	GPC=0	-0.472933	-8.04513	0.382535	3.78032e-16	57.8917	0.537918	88.104	77.7025	5.0325	15.3075	-344.241
BVC	Both	Mat=-05	Pht=-05	Yld=040	Gpc=70	w(-5,-5,40,70)	GPC=0	-0.472933	-8.04513	0.382535	-3.78032e-16	57.8917	0.462156	88.104	77.7025	5.0325	15.3075	-344.241
BVC	Both	Mat=-05	Pht=-05	Yld=040	Gpc=80	w(-5,-5,40,80)	GPC=0	-0.472933	-8.04513	0.382535	-1.89016e-16	57.8917	0.402802	88.104	77.7025	5.0325	15.3075	-344.241
BVC	Both	Mat=-05	Pht=-05	Yld=050	Gpc=01	w(-5,-5,50,1)	GPC=0	-0.284682	-7.84813	0.425501	1.76664e-16	61.9391	0.820237	88.3275	77.823	5.049	15.3685	-260.709
BVC	Both	Mat=-05	Pht=-05	Yld=050	Gpc=10	w(-5,-5,50,10)	GPC=0	-0.284682	-7.84813	0.425501	2.20831e-16	61.9391	0.911716	88.3275	77.823	5.049	15.3685	-260.709
BVC	Both	Mat=-05	Pht=-05	Yld=050	Gpc=20	w(-5,-5,50,20)	GPC=0	-0.284682	-7.84813	0.425501	3.53329e-16	61.9391	0.953342	88.3275	77.823	5.049	15.3685	-260.709
BVC	Both	Mat=-05	Pht=-05	Yld=050	Gpc=30	w(-5,-5,50,30)	GPC=0	-0.284682	-7.84813	0.425501	-4.41661e-17	61.9391	0.905096	88.3275	77.823	5.049	15.3685	-260.709
BVC	Both	Mat=-05	Pht=-05	Yld=050	Gpc=40	w(-5,-5,50,40)	GPC=0	-0.284682	-7.84813	0.425501	3.53329e-16	61.9391	0.799536	88.3275	77.823	5.049	15.3685	-260.709
BVC	Both	Mat=-05	Pht=-05	Yld=050	Gpc=50	w(-5,-5,50,50)	GPC=0	-0.284682	-7.84813	0.425501	0	61.9391	0.68501	88.3275	77.823	5.049	15.3685	-260.709
BVC	Both	Mat=-05	Pht=-05	Yld=050	Gpc=60	w(-5,-5,50,60)	GPC=0	-0.284682	-7.84813	0.425501	-8.83322e-17	61.9391	0.585096	88.3275	77.823	5.049	15.3685	-260.709
BVC	Both	Mat=-05	Pht=-05	Yld=050	Gpc=70	w(-5,-5,50,70)	GPC=0	-0.284682	-7.84813	0.425501	0	61.9391	0.504159	88.3275	77.823	5.049	15.3685	-260.709
BVC	Both	Mat=-05	Pht=-05	Yld=050	Gpc=80	w(-5,-5,50,80)	GPC=0	-0.284682	-7.84813	0.425501	-1.76664e-16	61.9391	0.439773	88.3275	77.823	5.049	15.3685	-260.709
BVC	Both	Mat=-05	Pht=-05	Yld=060	Gpc=01	w(-5,-5,60,1)	GPC=0	-0.118825	-7.63037	0.460485	1.64858e-16	66.3751	0.805571	88.464	78.1365	5.062	15.4475	-176.941
BVC	Both	Mat=-05	Pht=-05	Yld=060	Gpc=10	w(-5,-5,60,10)	GPC=0	-0.118825	-7.63037	0.460485	3.29715e-16	66.3751	0.894802	88.464	78.1365	5.062	15.4475	-176.941
BVC	Both	Mat=-05	Pht=-05	Yld=060	Gpc=20	w(-5,-5,60,20)	GPC=0	-0.118825	-7.63037	0.460485	0	66.3751	0.949529	88.464	78.1365	5.062	15.4475	-176.941
BVC	Both	Mat=-05	Pht=-05	Yld=060	Gpc=30	w(-5,-5,60,30)	GPC=0	-0.118825	-7.63037	0.460485	-8.24288e-17	66.3751	0.927014	88.464	78.1365	5.062	15.4475	-176.941
BVC	Both	Mat=-05	Pht=-05	Yld=060	Gpc=40	w(-5,-5,60,40)	GPC=0	-0.118825	-7.63037	0.460485	-8.24288e-17	66.3751	0.841393	88.464	78.1365	5.062	15.4475	-176.941
BVC	Both	Mat=-05	Pht=-05	Yld=060	Gpc=50	w(-5,-5,60,50)	GPC=0	-0.118825	-7.63037	0.460485	-1.64858e-16	66.3751	0.734069	88.464	78.1365	5.062	15.4475	-176.941
BVC	Both	Mat=-05	Pht=-05	Yld=060	Gpc=60	w(-5,-5,60,60)	GPC=0	-0.118825	-7.63037	0.460485	-4.94573e-16	66.3751	0.633297	88.464	78.1365	5.062	15.4475	-176.941
BVC	Both	Mat=-05	Pht=-05	Yld=060	Gpc=70	w(-5,-5,60,70)	GPC=0	-0.118825	-7.63037	0.460485	-3.29715e-16	66.3751	0.548384	88.464	78.1365	5.062	15.4475	-176.941
BVC	Both	Mat=-05	Pht=-05	Yld=060	Gpc=80	w(-5,-5,60,80)	GPC=0	-0.118825	-7.63037	0.460485	1.64858e-16	66.3751	0.479376	88.464	78.1365	5.062	15.4475	-176.941
BVC	Both	Mat=-05	Pht=-05	Yld=070	Gpc=01	w(-5,-5,70,1)	GPC=0	0.0261344	-7.40685	0.488906	-1.53844e-16	71.127	0.793757	88.443	78.102	5.108	15.3155	-93.048
BVC	Both	Mat=-05	Pht=-05	Yld=070	Gpc=10	w(-5,-5,70,10)	GPC=0	0.0261344	-7.40685	0.488906	1.53844e-16	71.127	0.879284	88.443	78.102	5.108	15.3155	-93.048
BVC	Both	Mat=-05	Pht=-05	Yld=070	Gpc=20	w(-5,-5,70,20)	GPC=0	0.0261344	-7.40685	0.488906	1.53844e-16	71.127	0.941625	88.443	78.102	5.108	15.3155	-93.048
BVC	Both	Mat=-05	Pht=-05	Yld=070	Gpc=30	w(-5,-5,70,30)	GPC=0	0.0261344	-7.40685	0.488906	4.61531e-16	71.127	0.940104	88.443	78.102	5.108	15.3155	-93.048
BVC	Both	Mat=-05	Pht=-05	Yld=070	Gpc=40	w(-5,-5,70,40)	GPC=0	0.0261344	-7.40685	0.488906	-1.53844e-16	71.127	0.875582	88.443	78.102	5.108	15.3155	-93.048
BVC	Both	Mat=-05	Pht=-05	Yld=070	Gpc=50	w(-5,-5,70,50)	GPC=0	0.0261344	-7.40685	0.488906	-7.69219e-17	71.127	0.779316	88.443	78.102	5.108	15.3155	-93.048
BVC	Both	Mat=-05	Pht=-05	Yld=070	Gpc=60	w(-5,-5,70,60)	GPC=0	0.0261344	-7.40685	0.488906	-1.53844e-16	71.127	0.680738	88.443	78.102	5.108	15.3155	-93.048
BVC	Both	Mat=-05	Pht=-05	Yld=070	Gpc=70	w(-5,-5,70,70)	GPC=0	0.0261344	-7.40685	0.488906	1.53844e-16	71.127	0.593537	88.443	78.102	5.108	15.3155	-93.048
BVC	Both	Mat=-05	Pht=-05	Yld=070	Gpc=80	w(-5,-5,70,80)	GPC=0	0.0261344	-7.40685	0.488906	-4.61531e-16	71.127	0.520685	88.443	78.102	5.108	15.3155	-93.048
BVC	Both	Mat=-05	Pht=-05	Yld=080	Gpc=01	w(-5,-5,80,1)	GPC=0	0.152423	-7.18701	0.512033	4.31169e-16	76.1356	0.784269	88.789	78.549	5.1735	15.285	-8.96049
BVC	Both	Mat=-05	Pht=-05	Yld=080	Gpc=10	w(-5,-5,80,10)	GPC=0	0.152423	-7.18701	0.512033	0	76.1356	0.865481	88.789	78.549	5.1735	15.285	-8.96049
BVC	Both	Mat=-05	Pht=-05	Yld=080	Gpc=20	w(-5,-5,80,20)	GPC=0	0.152423	-7.18701	0.512033	2.87446e-16	76.1356	0.931603	88.789	78.549	5.1735	15.285	-8.96049
BVC	Both	Mat=-05	Pht=-05	Yld=080	Gpc=30	w(-5,-5,80,30)	GPC=0	0.152423	-7.18701	0.512033	0	76.1356	0.946112	88.789	78.549	5.1735	15.285	-8.96049
BVC	Both	Mat=-05	Pht=-05	Yld=080	Gpc=40	w(-5,-5,80,40)	GPC=0	0.152423	-7.18701	0.512033	0	76.1356	0.901742	88.789	78.549	5.1735	15.285	-8.96049
BVC	Both	Mat=-05	Pht=-05	Yld=080	Gpc=50	w(-5,-5,80,50)	GPC=0	0.152423	-7.18701	0.512033	-1.43723e-16	76.1356	0.819187	88.789	78.549	5.1735	15.285	-8.96049
BVC	Both	Mat=-05	Pht=-05	Yld=080	Gpc=60	w(-5,-5,80,60)	GPC=0	0.152423	-7.18701	0.512033	-2.87446e-16	76.1356	0.725813	88.789	78.549	5.1735	15.285	-8.96049
BVC	Both	Mat=-05	Pht=-05	Yld=080	Gpc=70	w(-5,-5,80,70)	GPC=0	0.152423	-7.18701	0.512033	-4.31169e-16	76.1356	0.638352	88.789	78.549	5.1735	15.285	-8.96049
BVC	Both	Mat=-05	Pht=-05	Yld=080	Gpc=80	w(-5,-5,80,80)	GPC=0	0.152423	-7.18701	0.512033	-4.31169e-16	76.1356	0.562764	88.789	78.549	5.1735	15.285	-8.96049
BVC	Both	Mat=-05	Pht=-05	Yld=090	Gpc=01	w(-5,-5,90,1)	GPC=0	0.262443	-6.97631	0.530936	2.6901e-16	81.3536	0.776635	89.1895	78.794	5.2455	15.199	75.8555
BVC	Both	Mat=-05	Pht=-05	Yld=090	Gpc=10	w(-5,-5,90,10)	GPC=0	0.262443	-6.97631	0.530936	1.34505e-16	81.3536	0.853398	89.1895	78.794	5.2455	15.199	75.8555
BVC	Both	Mat=-05	Pht=-05	Yld=090	Gpc=20	w(-5,-5,90,20)	GPC=0	0.262443	-6.97631	0.530936	0	81.3536	0.920775	89.1895	78.794	5.2455	15.199	75.8555
BVC	Both	Mat=-05	Pht=-05	Yld=090	Gpc=30	w(-5,-5,90,30)	GPC=0	0.262443	-6.97631	0.530936	5.38019e-16	81.3536	0.946915	89.1895	78.794	5.2455	15.199	75.8555
BVC	Both	Mat=-05	Pht=-05	Yld=090	Gpc=40	w(-5,-5,90,40)	GPC=0	0.262443	-6.97631	0.530936	0	81.3536	0.920412	89.1895	78.794	5.2455	15.199	75.8555
BVC	Both	Mat=-05	Pht=-05	Yld=090	Gpc=50	w(-5,-5,90,50)	GPC=0	0.262443	-6.97631	0.530936	0	81.3536	0.852821	89.1895	78.794	5.2455	15.199	75.8555
BVC	Both	Mat=-05	Pht=-05	Yld=090	Gpc=60	w(-5,-5,90,60)	GPC=0	0.262443	-6.97631	0.530936	0	81.3536	0.767226	89.1895	78.794	5.2455	15.199	75.8555
BVC	Both	Mat=-05	Pht=-05	Yld=090	Gpc=70	w(-5,-5,90,70)	GPC=0	0.262443	-6.97631	0.530936	-2.6901e-16	81.3536	0.681659	89.1895	78.794	5.2455	15.199	75.8555
BVC	Both	Mat=-05	Pht=-05	Yld=090	Gpc=80	w(-5,-5,90,80)	GPC=0	0.262443	-6.97631	0.530936	-2.6901e-16	81.3536	0.6047	89.1895	78.794	5.2455	15.199	75.8555
BVC	Both	Mat=-05	Pht=-05	Yld=100	Gpc=01	w(-5,-5,100,1)	GPC=0	0.358491	-6.77757	0.546478	2.52295e-16	86.7432	0.770464	89.278	78.7715	5.2755	15.1235	160.805
BVC	Both	Mat=-05	Pht=-05	Yld=100	Gpc=10	w(-5,-5,100,10)	GPC=0	0.358491	-6.77757	0.546478	0	86.7432	0.842895	89.278	78.7715	5.2755	15.1235	160.805
BVC	Both	Mat=-05	Pht=-05	Yld=100	Gpc=20	w(-5,-5,100,20)	GPC=0	0.358491	-6.77757	0.546478	2.52295e-16	86.7432	0.909935	89.278	78.7715	5.2755	15.1235	160.805
BVC	Both	Mat=-05	Pht=-05	Yld=100	Gpc=30	w(-5,-5,100,30)	GPC=0	0.358491	-6.77757	0.546478	2.52295e-16	86.7432	0.944155	89.278	78.7715	5.2755	15.1235	160.805
BVC	Both	Mat=-05	Pht=-05	Yld=100	Gpc=40	w(-5,-5,100,40)	GPC=0	0.358491	-6.77757	0.546478	2.52295e-16	86.7432	0.932655	89.278	78.7715	5.2755	15.1235	160.805
BVC	Both	Mat=-05	Pht=-05	Yld=100	Gpc=50	w(-5,-5,100,50)	GPC=0	0.358491	-6.77757	0.546478	2.52295e-16	86.7432	0.880021	89.278	78.7715	5.2755	15.1235	160.805
BVC	Both	Mat=-05	Pht=-05	Yld=100	Gpc=60	w(-5,-5,100,60)	GPC=0	0.358491	-6.77757	0.546478	2.52295e-16	86.7432	0.804078	89.278	78.7715	5.2755	15.1235	160.805
BVC	Both	Mat=-05	Pht=-05	Yld=100	Gpc=70	w(-5,-5,100,70)	GPC=0	0.358491	-6.77757	0.546478	0	86.7432	0.722457	89.278	78.7715	5.2755	15.1235	160.805
BVC	Both	Mat=-05	Pht=-05	Yld=100	Gpc=80	w(-5,-5,100,80)	GPC=0	0.358491	-6.77757	0.546478	-2.52295e-16	86.7432	0.645641	89.278	78.7715	5.2755	15.1235	160.805
BVC	Both	Mat=-05	Pht=-05	Yld=110	Gpc=01	w(-5,-5,110,1)	GPC=0	0.442621	-6.59196	0.559341	0	92.2742	0.765448	89.278	78.7715	5.2755	15.1235	245.767
BVC	Both	Mat=-05	Pht=-05	Yld=110	Gpc=10	w(-5,-5,110,10)	GPC=0	0.442621	-6.59196	0.559341	2.37172e-16	92.2742	0.833783	89.278	78.7715	5.2755	15.1235	245.767
BVC	Both	Mat=-05	Pht=-05	Yld=110	Gpc=20	w(-5,-5,110,20)	GPC=0	0.442621	-6.59196	0.559341	0	92.2742	0.899524	89.278	78.7715	5.2755	15.1235	245.767
BVC	Both	Mat=-05	Pht=-05	Yld=110	Gpc=30	w(-5,-5,110,30)	GPC=0	0.442621	-6.59196	0.559341	-1.18586e-16	92.2742	0.939116	89.278	78.7715	5.2755	15.1235	245.767
BVC	Both	Mat=-05	Pht=-05	Yld=110	Gpc=40	w(-5,-5,110,40)	GPC=0	0.442621	-6.59196	0.559341	-1.18586e-16	92.2742	0.939716	89.278	78.7715	5.2755	15.1235	245.767
BVC	Both	Mat=-05	Pht=-05	Yld=110	Gpc=50	w(-5,-5,110,50)	GPC=0	0.442621	-6.59196	0.559341	0	92.2742	0.901108	89.278	78.7715	5.2755	15.1235	245.767
BVC	Both	Mat=-05	Pht=-05	Yld=110	Gpc=60	w(-5,-5,110,60)	GPC=0	0.442621	-6.59196	0.559341	0	92.2742	0.835887	89.278	78.7715	5.2755	15.1235	245.767
BVC	Both	Mat=-05	Pht=-05	Yld=110	Gpc=70	w(-5,-5,110,70)	GPC=0	0.442621	-6.59196	0.559341	0	92.2742	0.759966	89.278	78.7715	5.2755	15.1235	245.767
BVC	Both	Mat=-05	Pht=-05	Yld=110	Gpc=80	w(-5,-5,110,80)	GPC=0	0.442621	-6.59196	0.559341	0	92.2742	0.684825	89.278	78.7715	5.2755	15.1235	245.767
BVC	Both	Mat=-05	Pht=-05	Yld=120	Gpc=01	w(-5,-5,120,1)	GPC=0	0.516615	-6.41963	0.570065	0	97.9229	0.761342	89.213	79.044	5.2795	15.145	330.796
BVC	Both	Mat=-05	Pht=-05	Yld=120	Gpc=10	w(-5,-5,120,10)	GPC=0	0.516615	-6.41963	0.570065	2.23491e-16	97.9229	0.825868	89.213	79.044	5.2795	15.145	330.796
BVC	Both	Mat=-05	Pht=-05	Yld=120	Gpc=20	w(-5,-5,120,20)	GPC=0	0.516615	-6.41963	0.570065	0	97.9229	0.889759	89.213	79.044	5.2795	15.145	330.796
BVC	Both	Mat=-05	Pht=-05	Yld=120	Gpc=30	w(-5,-5,120,30)	GPC=0	0.516615	-6.41963	0.570065	-2.23491e-16	97.9229	0.932731	89.213	79.044	5.2795	15.145	330.796
BVC	Both	Mat=-05	Pht=-05	Yld=120	Gpc=40	w(-5,-5,120,40)	GPC=0	0.516615	-6.41963	0.570065	0	97.9229	0.942796	89.213	79.044	5.2795	15.145	330.796
BVC	Both	Mat=-05	Pht=-05	Yld=120	Gpc=50	w(-5,-5,120,50)	GPC=0	0.516615	-6.41963	0.570065	-1.11746e-16	97.9229	0.916732	89.213	79.044	5.2795	15.145	330.796
BVC	Both	Mat=-05	Pht=-05	Yld=120	Gpc=60	w(-5,-5,120,60)	GPC=0	0.516615	-6.41963	0.570065	0	97.9229	0.862552	89.213	79.044	5.2795	15.145	330.796
BVC	Both	Mat=-05	Pht=-05	Yld=120	Gpc=70	w(-5,-5,120,70)	GPC=0	0.516615	-6.41963	0.570065	0	97.9229	0.793658	89.213	79.044	5.2795	15.145	330.796
BVC	Both	Mat=-05	Pht=-05	Yld=120	Gpc=80	w(-5,-5,120,80)	GPC=0	0.516615	-6.41963	0.570065	1.11746e-16	97.9229	0.721624	89.213	79.044	5.2795	15.145	330.796
BVC	Both	Mat=-05	Pht=-05	Yld=130	Gpc=01	w(-5,-5,130,1)	GPC=0	0.581986	-6.26015	0.579069	4.22204e-16	103.67	0.757958	89.213	79.044	5.2795	15.145	415.831
BVC	Both	Mat=-05	Pht=-05	Yld=130	Gpc=10	w(-5,-5,130,10)	GPC=0	0.581986	-6.26015	0.579069	2.11102e-16	103.67	0.818972	89.213	79.044	5.2795	15.145	415.831
BVC	Both	Mat=-05	Pht=-05	Yld=130	Gpc=20	w(-5,-5,130,20)	GPC=0	0.581986	-6.26015	0.579069	0	103.67	0.880727	89.213	79.044	5.2795	15.145	415.831
BVC	Both	Mat=-05	Pht=-05	Yld=130	Gpc=30	w(-5,-5,130,30)	GPC=0	0.581986	-6.26015	0.579069	2.11102e-16	103.67	0.925645	89.213	79.044	5.2795	15.145	415.831
BVC	Both	Mat=-05	Pht=-05	Yld=130	Gpc=40	w(-5,-5,130,40)	GPC=0	0.581986	-6.26015	0.579069	-9.38433e-17	103.67	0.942938	89.213	79.044	5.2795	15.145	415.831
BVC	Both	Mat=-05	Pht=-05	Yld=130	Gpc=50	w(-5,-5,130,50)	GPC=0	0.581986	-6.26015	0.579069	1.99588e-16	103.67	0.927698	89.213	79.044	5.2795	15.145	415.831
BVC	Both	Mat=-05	Pht=-05	Yld=130	Gpc=60	w(-5,-5,130,60)	GPC=0	0.581986	-6.26015	0.579069	1.17259e-16	103.67	0.884272	89.213	79.044	5.2795	15.145	415.831
BVC	Both	Mat=-05	Pht=-05	Yld=130	Gpc=70	w(-5,-5,130,70)	GPC=0	0.581986	-6.26015	0.579069	-2.11102e-16	103.67	0.823256	89.213	79.044	5.2795	15.145	415.831
BVC	Both	Mat=-05	Pht=-05	Yld=130	Gpc=80	w(-5,-5,130,80)	GPC=0	0.581986	-6.26015	0.579069	-2.11102e-16	103.67	0.755554	89.213	79.044	5.2795	15.145	415.831
BVC	Both	Mat=-05	Pht=-05	Yld=140	Gpc=01	w(-5,-5,140,1)	GPC=0	0.640005	-6.1128	0.586683	5.99588e-16	109.5	0.755151	89.213	79.044	5.2795	15.145	500.867
BVC	Both	Mat=-05	Pht=-05	Yld=140	Gpc=10	w(-5,-5,140,10)	GPC=0	0.640005	-6.1128	0.586683	1.99863e-16	109.5	0.812942	89.213	79.044	5.2795	15.145	500.867
BVC	Both	Mat=-05	Pht=-05	Yld=140	Gpc=20	w(-5,-5,140,20)	GPC=0	0.640005	-6.1128	0.586683	1.99863e-16	109.5	0.872437	89.213	79.044	5.2795	15.145	500.867
BVC	Both	Mat=-05	Pht=-05	Yld=140	Gpc=30	w(-5,-5,140,30)	GPC=0	0.640005	-6.1128	0.586683	0	109.5	0.918288	89.213	79.044	5.2795	15.145	500.867
BVC	Both	Mat=-05	Pht=-05	Yld=140	Gpc=40	w(-5,-5,140,40)	GPC=0	0.640005	-6.1128	0.586683	1.99863e-16	109.5	0.940983	89.213	79.044	5.2795	15.145	500.867
BVC	Both	Mat=-05	Pht=-05	Yld=140	Gpc=50	w(-5,-5,140,50)	GPC=0	0.640005	-6.1128	0.586683	3.99725e-16	109.5	0.934837	89.213	79.044	5.2795	15.145	500.867
BVC	Both	Mat=-05	Pht=-05	Yld=140	Gpc=60	w(-5,-5,140,60)	GPC=0	0.640005	-6.1128	0.586683	5.65694e-17	109.5	0.901457	89.213	79.044	5.2795	15.145	500.867
BVC	Both	Mat=-05	Pht=-05	Yld=140	Gpc=70	w(-5,-5,140,70)	GPC=0	0.640005	-6.1128	0.586683	3.99725e-16	109.5	0.848707	89.213	79.044	5.2795	15.145	500.867
BVC	Both	Mat=-05	Pht=-05	Yld=140	Gpc=80	w(-5,-5,140,80)	GPC=0	0.640005	-6.1128	0.586683	0	109.5	0.786296	89.213	79.044	5.2795	15.145	500.867
BVC	Both	Mat=-05	Pht=-05	Yld=150	Gpc=01	w(-5,-5,150,1)	GPC=0	0.691737	-5.9767	0.593166	1.89644e-16	115.4	0.752805	89.3815	78.983	5.3025	15.0825	585.935
BVC	Both	Mat=-05	Pht=-05	Yld=150	Gpc=10	w(-5,-5,150,10)	GPC=0	0.691737	-5.9767	0.593166	1.89644e-16	115.4	0.807644	89.3815	78.983	5.3025	15.0825	585.935
BVC	Both	Mat=-05	Pht=-05	Yld=150	Gpc=20	w(-5,-5,150,20)	GPC=0	0.691737	-5.9767	0.593166	-1.89644e-16	115.4	0.864858	89.3815	78.983	5.3025	15.0825	585.935
BVC	Both	Mat=-05	Pht=-05	Yld=150	Gpc=30	w(-5,-5,150,30)	GPC=0	0.691737	-5.9767	0.593166	1.89644e-16	115.4	0.910936	89.3815	78.983	5.3025	15.0825	585.935
BVC	Both	Mat=-05	Pht=-05	Yld=150	Gpc=40	w(-5,-5,150,40)	GPC=0	0.691737	-5.9767	0.593166	3.79289e-16	115.4	0.937586	89.3815	78.983	5.3025	15.0825	585.935
BVC	Both	Mat=-05	Pht=-05	Yld=150	Gpc=50	w(-5,-5,150,50)	GPC=0	0.691737	-5.9767	0.593166	1.89644e-16	115.4	0.938924	89.3815	78.983	5.3025	15.0825	585.935
BVC	Both	Mat=-05	Pht=-05	Yld=150	Gpc=60	w(-5,-5,150,60)	GPC=0	0.691737	-5.9767	0.593166	3.79289e-16	115.4	0.91463	89.3815	78.983	5.3025	15.0825	585.935
BVC	Both	Mat=-05	Pht=-05	Yld=150	Gpc=70	w(-5,-5,150,70)	GPC=0	0.691737	-5.9767	0.593166	-1.89644e-16	115.4	0.870143	89.3815	78.983	5.3025	15.0825	585.935
BVC	Both	Mat=-05	Pht=-05	Yld=150	Gpc=80	w(-5,-5,150,80)	GPC=0	0.691737	-5.9767	0.593166	0	115.4	0.813681	89.3815	78.983	5.3025	15.0825	585.935
BVC	Both	Mat=-05	Pht=-10	Yld=001	Gpc=01	w(-5,-10,1,1)	GPC=0	-0.548831	-8.72395	0.176445	0	90.1601	0.880971	88.564	76.3705	4.8365	15.119	-833.746
BVC	Both	Mat=-05	Pht=-10	Yld=001	Gpc=10	w(-5,-10,1,10)	GPC=0	-0.548831	-8.72395	0.176445	1.21367e-16	90.1601	0.934059	88.564	76.3705	4.8365	15.119	-833.746
BVC	Both	Mat=-05	Pht=-10	Yld=001	Gpc=20	w(-5,-10,1,20)	GPC=0	-0.548831	-8.72395	0.176445	2.42734e-16	90.1601	0.95865	88.564	76.3705	4.8365	15.119	-833.746
BVC	Both	Mat=-05	Pht=-10	Yld=001	Gpc=30	w(-5,-10,1,30)	GPC=0	-0.548831	-8.72395	0.176445	1.8205e-16	90.1601	0.938475	88.564	76.3705	4.8365	15.119	-833.746
BVC	Both	Mat=-05	Pht=-10	Yld=001	Gpc=40	w(-5,-10,1,40)	GPC=0	-0.548831	-8.72395	0.176445	-6.06834e-17	90.1601	0.881122	88.564	76.3705	4.8365	15.119	-833.746
BVC	Both	Mat=-05	Pht=-10	Yld=001	Gpc=50	w(-5,-10,1,50)	GPC=0	-0.548831	-8.72395	0.176445	0	90.1601	0.80426	88.564	76.3705	4.8365	15.119	-833.746
BVC	Both	Mat=-05	Pht=-10	Yld=001	Gpc=60	w(-5,-10,1,60)	GPC=0	-0.548831	-8.72395	0.176445	-2.42734e-16	90.1601	0.723711	88.564	76.3705	4.8365	15.119	-833.746
BVC	Both	Mat=-05	Pht=-10	Yld=001	Gpc=70	w(-5,-10,1,70)	GPC=0	-0.548831	-8.72395	0.176445	-1.8205e-16	90.1601	0.648489	88.564	76.3705	4.8365	15.119	-833.746
BVC	Both	Mat=-05	Pht=-10	Yld=001	Gpc=80	w(-5,-10,1,80)	GPC=0	-0.548831	-8.72395	0.176445	-2.42734e-16	90.1601	0.582039	88.564	76.3705	4.8365	15.119	-833.746
BVC	Both	Mat=-05	Pht=-10	Yld=010	Gpc=01	w(-5,-10,10,1)	GPC=0	-0.442899	-8.75627	0.214283	-3.57129e-16	91.92	0.867453	88.6865	76.343	4.8665	15.124	-760.557
BVC	Both	Mat=-05	Pht=-10	Yld=010	Gpc=10	w(-5,-10,10,10)	GPC=0	-0.442899	-8.75627	0.214283	1.19043e-16	91.92	0.924192	88.6865	76.343	4.8665	15.124	-760.557
BVC	Both	Mat=-05	Pht=-10	Yld=010	Gpc=20	w(-5,-10,10,20)	GPC=0	-0.442899	-8.75627	0.214283	-1.19043e-16	91.92	0.95725	88.6865	76.343	4.8665	15.124	-760.557
BVC	Both	Mat=-05	Pht=-10	Yld=010	Gpc=30	w(-5,-10,10,30)	GPC=0	-0.442899	-8.75627	0.214283	-3.57129e-16	91.92	0.947799	88.6865	76.343	4.8665	15.124	-760.557
BVC	Both	Mat=-05	Pht=-10	Yld=010	Gpc=40	w(-5,-10,10,40)	GPC=0	-0.442899	-8.75627	0.214283	-3.27369e-16	91.92	0.899334	88.6865	76.343	4.8665	15.124	-760.557
BVC	Both	Mat=-05	Pht=-10	Yld=010	Gpc=50	w(-5,-10,10,50)	GPC=0	-0.442899	-8.75627	0.214283	-3.57129e-16	91.92	0.827337	88.6865	76.343	4.8665	15.124	-760.557
BVC	Both	Mat=-05	Pht=-10	Yld=010	Gpc=60	w(-5,-10,10,60)	GPC=0	-0.442899	-8.75627	0.214283	-3.8689e-16	91.92	0.748096	88.6865	76.343	4.8665	15.124	-760.557
BVC	Both	Mat=-05	Pht=-10	Yld=010	Gpc=70	w(-5,-10,10,70)	GPC=0	-0.442899	-8.75627	0.214283	-4.46412e-16	91.92	0.672055	88.6865	76.343	4.8665	15.124	-760.557
BVC	Both	Mat=-05	Pht=-10	Yld=010	Gpc=80	w(-5,-10,10,80)	GPC=0	-0.442899	-8.75627	0.214283	-2.38086e-16	91.92	0.603832	88.6865	76.343	4.8665	15.124	-760.557
BVC	Both	Mat=-05	Pht=-10	Yld=020	Gpc=01	w(-5,-10,20,1)	GPC=0	-0.328504	-8.75471	0.253618	0	94.262	0.852931	89.1245	76.476	5.007	15.175	-678.528
BVC	Both	Mat=-05	Pht=-10	Yld=020	Gpc=10	w(-5,-10,20,10)	GPC=0	-0.328504	-8.75471	0.253618	1.59618e-16	94.262	0.912217	89.1245	76.476	5.007	15.175	-678.528
BVC	Both	Mat=-05	Pht=-10	Yld=020	Gpc=20	w(-5,-10,20,20)	GPC=0	-0.328504	-8.75471	0.253618	0	94.262	0.952945	89.1245	76.476	5.007	15.175	-678.528
BVC	Both	Mat=-05	Pht=-10	Yld=020	Gpc=30	w(-5,-10,20,30)	GPC=0	-0.328504	-8.75471	0.253618	3.04724e-16	94.262	0.95475	89.1245	76.476	5.007	15.175	-678.528
BVC	Both	Mat=-05	Pht=-10	Yld=020	Gpc=40	w(-5,-10,20,40)	GPC=0	-0.328504	-8.75471	0.253618	-2.90214e-17	94.262	0.916991	89.1245	76.476	5.007	15.175	-678.528
BVC	Both	Mat=-05	Pht=-10	Yld=020	Gpc=50	w(-5,-10,20,50)	GPC=0	-0.328504	-8.75471	0.253618	2.32171e-16	94.262	0.851931	89.1245	76.476	5.007	15.175	-678.528
BVC	Both	Mat=-05	Pht=-10	Yld=020	Gpc=60	w(-5,-10,20,60)	GPC=0	-0.328504	-8.75471	0.253618	-2.1766e-16	94.262	0.775507	89.1245	76.476	5.007	15.175	-678.528
BVC	Both	Mat=-05	Pht=-10	Yld=020	Gpc=70	w(-5,-10,20,70)	GPC=0	-0.328504	-8.75471	0.253618	-2.46682e-16	94.262	0.699444	89.1245	76.476	5.007	15.175	-678.528
BVC	Both	Mat=-05	Pht=-10	Yld=020	Gpc=80	w(-5,-10,20,80)	GPC=0	-0.328504	-8.75471	0.253618	-1.88639e-16	94.262	0.629724	89.1245	76.476	5.007	15.175	-678.528
BVC	Both	Mat=-05	Pht=-10	Yld=030	Gpc=01	w(-5,-10,30,1)	GPC=0	-0.218798	-8.71909	0.28991	2.25659e-16	96.9822	0.839283	88.9985	76.721	4.9955	15.255	-595.608
BVC	Both	Mat=-05	Pht=-10	Yld=030	Gpc=10	w(-5,-10,30,10)	GPC=0	-0.218798	-8.71909	0.28991	4.5837e-17	96.9822	0.899795	88.9985	76.721	4.9955	15.255	-595.608
BVC	Both	Mat=-05	Pht=-10	Yld=030	Gpc=20	w(-5,-10,30,20)	GPC=0	-0.218798	-8.71909	0.28991	-1.05778e-17	96.9822	0.946354	88.9985	76.721	4.9955	15.255	-595.608
BVC	Both	Mat=-05	Pht=-10	Yld=030	Gpc=30	w(-5,-10,30,30)	GPC=0	-0.218798	-8.71909	0.28991	-4.2311e-17	96.9822	0.958231	88.9985	76.721	4.9955	15.255	-595.608
BVC	Both	Mat=-05	Pht=-10	Yld=030	Gpc=40	w(-5,-10,30,40)	GPC=0	-0.218798	-8.71909	0.28991	-2.6797e-16	96.9822	0.931449	88.9985	76.721	4.9955	15.255	-595.608
BVC	Both	Mat=-05	Pht=-10	Yld=030	Gpc=50	w(-5,-10,30,50)	GPC=0	-0.218798	-8.71909	0.28991	0	96.9822	0.874648	88.9985	76.721	4.9955	15.255	-595.608
BVC	Both	Mat=-05	Pht=-10	Yld=030	Gpc=60	w(-5,-10,30,60)	GPC=0	-0.218798	-8.71909	0.28991	-9.87257e-17	96.9822	0.802501	88.9985	76.721	4.9955	15.255	-595.608
BVC	Both	Mat=-05	Pht=-10	Yld=030	Gpc=70	w(-5,-10,30,70)	GPC=0	-0.218798	-8.71909	0.28991	-3.17333e-17	96.9822	0.727506	88.9985	76.721	4.9955	15.255	-595.608
BVC	Both	Mat=-05	Pht=-10	Yld=030	Gpc=80	w(-5,-10,30,80)	GPC=0	-0.218798	-8.71909	0.28991	-2.99703e-16	96.9822	0.656945	88.9985	76.721	4.9955	15.255	-595.608
BVC	Both	Mat=-05	Pht=-10	Yld=040	Gpc=01	w(-5,-10,40,1)	GPC=0	-0.114678	-8.65526	0.323096	9.56987e-17	100.05	0.826727	89.1595	76.6445	5.0455	15.1965	-512.566
BVC	Both	Mat=-05	Pht=-10	Yld=040	Gpc=10	w(-5,-10,40,10)	GPC=0	-0.114678	-8.65526	0.323096	1.36712e-16	100.05	0.887432	89.1595	76.6445	5.0455	15.1965	-512.566
BVC	Both	Mat=-05	Pht=-10	Yld=040	Gpc=20	w(-5,-10,40,20)	GPC=0	-0.114678	-8.65526	0.323096	-6.83562e-17	100.05	0.938133	89.1595	76.6445	5.0455	15.1965	-512.566
BVC	Both	Mat=-05	Pht=-10	Yld=040	Gpc=30	w(-5,-10,40,30)	GPC=0	-0.114678	-8.65526	0.323096	-1.23041e-16	100.05	0.958599	89.1595	76.6445	5.0455	15.1965	-512.566
BVC	Both	Mat=-05	Pht=-10	Yld=040	Gpc=40	w(-5,-10,40,40)	GPC=0	-0.114678	-8.65526	0.323096	-5.4685e-17	100.05	0.942482	89.1595	76.6445	5.0455	15.1965	-512.566
BVC	Both	Mat=-05	Pht=-10	Yld=040	Gpc=50	w(-5,-10,40,50)	GPC=0	-0.114678	-8.65526	0.323096	-4.3748e-16	100.05	0.894835	89.1595	76.6445	5.0455	15.1965	-512.566
BVC	Both	Mat=-05	Pht=-10	Yld=040	Gpc=60	w(-5,-10,40,60)	GPC=0	-0.114678	-8.65526	0.323096	-2.1874e-16	100.05	0.828322	89.1595	76.6445	5.0455	15.1965	-512.566
BVC	Both	Mat=-05	Pht=-10	Yld=040	Gpc=70	w(-5,-10,40,70)	GPC=0	-0.114678	-8.65526	0.323096	-2.1874e-16	100.05	0.755576	89.1595	76.6445	5.0455	15.1965	-512.566
BVC	Both	Mat=-05	Pht=-10	Yld=040	Gpc=80	w(-5,-10,40,80)	GPC=0	-0.114678	-8.65526	0.323096	-2.05069e-16	100.05	0.684975	89.1595	76.6445	5.0455	15.1965	-512.566
BVC	Both	Mat=-05	Pht=-10	Yld=050	Gpc=01	w(-5,-10,50,1)	GPC=0	-0.0167028	-8.56892	0.353224	5.28958e-16	103.434	0.81536	89.1515	76.959	5.048	15.2895	-429.283
BVC	Both	Mat=-05	Pht=-10	Yld=050	Gpc=10	w(-5,-10,50,10)	GPC=0	-0.0167028	-8.56892	0.353224	2.90927e-16	103.434	0.875494	89.1515	76.959	5.048	15.2895	-429.283
BVC	Both	Mat=-05	Pht=-10	Yld=050	Gpc=20	w(-5,-10,50,20)	GPC=0	-0.0167028	-8.56892	0.353224	1.85135e-16	103.434	0.928886	89.1515	76.959	5.048	15.2895	-429.283
BVC	Both	Mat=-05	Pht=-10	Yld=050	Gpc=30	w(-5,-10,50,30)	GPC=0	-0.0167028	-8.56892	0.353224	2.90927e-16	103.434	0.956363	89.1515	76.959	5.048	15.2895	-429.283
BVC	Both	Mat=-05	Pht=-10	Yld=050	Gpc=40	w(-5,-10,50,40)	GPC=0	-0.0167028	-8.56892	0.353224	0	103.434	0.950129	89.1515	76.959	5.048	15.2895	-429.283
BVC	Both	Mat=-05	Pht=-10	Yld=050	Gpc=50	w(-5,-10,50,50)	GPC=0	-0.0167028	-8.56892	0.353224	0	103.434	0.91205	89.1515	76.959	5.048	15.2895	-429.283
BVC	Both	Mat=-05	Pht=-10	Yld=050	Gpc=60	w(-5,-10,50,60)	GPC=0	-0.0167028	-8.56892	0.353224	-4.23167e-16	103.434	0.8523	89.1515	76.959	5.048	15.2895	-429.283
BVC	Both	Mat=-05	Pht=-10	Yld=050	Gpc=70	w(-5,-10,50,70)	GPC=0	-0.0167028	-8.56892	0.353224	-1.58687e-16	103.434	0.782992	89.1515	76.959	5.048	15.2895	-429.283
BVC	Both	Mat=-05	Pht=-10	Yld=050	Gpc=80	w(-5,-10,50,80)	GPC=0	-0.0167028	-8.56892	0.353224	-3.96719e-16	103.434	0.713259	89.1515	76.959	5.048	15.2895	-429.283
BVC	Both	Mat=-05	Pht=-10	Yld=060	Gpc=01	w(-5,-10,60,1)	GPC=0	0.0748641	-8.46535	0.380422	2.04332e-16	107.105	0.805192	89.1515	76.959	5.048	15.2895	-345.822
BVC	Both	Mat=-05	Pht=-10	Yld=060	Gpc=10	w(-5,-10,60,10)	GPC=0	0.0748641	-8.46535	0.380422	0	107.105	0.864215	89.1515	76.959	5.048	15.2895	-345.822
BVC	Both	Mat=-05	Pht=-10	Yld=060	Gpc=20	w(-5,-10,60,20)	GPC=0	0.0748641	-8.46535	0.380422	2.04332e-16	107.105	0.919122	89.1515	76.959	5.048	15.2895	-345.822
BVC	Both	Mat=-05	Pht=-10	Yld=060	Gpc=30	w(-5,-10,60,30)	GPC=0	0.0748641	-8.46535	0.380422	1.53249e-16	107.105	0.952085	89.1515	76.959	5.048	15.2895	-345.822
BVC	Both	Mat=-05	Pht=-10	Yld=060	Gpc=40	w(-5,-10,60,40)	GPC=0	0.0748641	-8.46535	0.380422	2.04332e-16	107.105	0.954645	89.1515	76.959	5.048	15.2895	-345.822
BVC	Both	Mat=-05	Pht=-10	Yld=060	Gpc=50	w(-5,-10,60,50)	GPC=0	0.0748641	-8.46535	0.380422	5.73596e-17	107.105	0.92608	89.1515	76.959	5.048	15.2895	-345.822
BVC	Both	Mat=-05	Pht=-10	Yld=060	Gpc=60	w(-5,-10,60,60)	GPC=0	0.0748641	-8.46535	0.380422	-1.46973e-16	107.105	0.873908	89.1515	76.959	5.048	15.2895	-345.822
BVC	Both	Mat=-05	Pht=-10	Yld=060	Gpc=70	w(-5,-10,60,70)	GPC=0	0.0748641	-8.46535	0.380422	0	107.105	0.809137	89.1515	76.959	5.048	15.2895	-345.822
BVC	Both	Mat=-05	Pht=-10	Yld=060	Gpc=80	w(-5,-10,60,80)	GPC=0	0.0748641	-8.46535	0.380422	-2.04332e-16	107.105	0.741235	89.1515	76.959	5.048	15.2895	-345.822
BVC	Both	Mat=-05	Pht=-10	Yld=070	Gpc=01	w(-5,-10,70,1)	GPC=0	0.15999	-8.34919	0.404875	4.92756e-17	111.033	0.796175	89.1515	76.959	5.048	15.2895	-262.362
BVC	Both	Mat=-05	Pht=-10	Yld=070	Gpc=10	w(-5,-10,70,10)	GPC=0	0.15999	-8.34919	0.404875	1.97102e-16	111.033	0.85373	89.1515	76.959	5.048	15.2895	-262.362
BVC	Both	Mat=-05	Pht=-10	Yld=070	Gpc=20	w(-5,-10,70,20)	GPC=0	0.15999	-8.34919	0.404875	4.92756e-17	111.033	0.909232	89.1515	76.959	5.048	15.2895	-262.362
BVC	Both	Mat=-05	Pht=-10	Yld=070	Gpc=30	w(-5,-10,70,30)	GPC=0	0.15999	-8.34919	0.404875	-1.47827e-16	111.033	0.946312	89.1515	76.959	5.048	15.2895	-262.362
BVC	Both	Mat=-05	Pht=-10	Yld=070	Gpc=40	w(-5,-10,70,40)	GPC=0	0.15999	-8.34919	0.404875	0	111.033	0.956422	89.1515	76.959	5.048	15.2895	-262.362
BVC	Both	Mat=-05	Pht=-10	Yld=070	Gpc=50	w(-5,-10,70,50)	GPC=0	0.15999	-8.34919	0.404875	-1.47827e-16	111.033	0.936926	89.1515	76.959	5.048	15.2895	-262.362
BVC	Both	Mat=-05	Pht=-10	Yld=070	Gpc=60	w(-5,-10,70,60)	GPC=0	0.15999	-8.34919	0.404875	-9.85511e-17	111.033	0.892788	89.1515	76.959	5.048	15.2895	-262.362
BVC	Both	Mat=-05	Pht=-10	Yld=070	Gpc=70	w(-5,-10,70,70)	GPC=0	0.15999	-8.34919	0.404875	-4.92756e-16	111.033	0.833487	89.1515	76.959	5.048	15.2895	-262.362
BVC	Both	Mat=-05	Pht=-10	Yld=070	Gpc=80	w(-5,-10,70,80)	GPC=0	0.15999	-8.34919	0.404875	0	111.033	0.768367	89.1515	76.959	5.048	15.2895	-262.362
BVC	Both	Mat=-05	Pht=-10	Yld=080	Gpc=01	w(-5,-10,80,1)	GPC=0	0.238816	-8.2244	0.426796	3.79967e-16	115.194	0.788228	88.9605	77.3755	5.048	15.3715	-178.898
BVC	Both	Mat=-05	Pht=-10	Yld=080	Gpc=10	w(-5,-10,80,10)	GPC=0	0.238816	-8.2244	0.426796	1.89984e-16	115.194	0.844093	88.9605	77.3755	5.048	15.3715	-178.898
BVC	Both	Mat=-05	Pht=-10	Yld=080	Gpc=20	w(-5,-10,80,20)	GPC=0	0.238816	-8.2244	0.426796	0	115.194	0.899501	88.9605	77.3755	5.048	15.3715	-178.898
BVC	Both	Mat=-05	Pht=-10	Yld=080	Gpc=30	w(-5,-10,80,30)	GPC=0	0.238816	-8.2244	0.426796	2.84975e-16	115.194	0.939524	88.9605	77.3755	5.048	15.3715	-178.898
BVC	Both	Mat=-05	Pht=-10	Yld=080	Gpc=40	w(-5,-10,80,40)	GPC=0	0.238816	-8.2244	0.426796	-1.89984e-16	115.194	0.955921	88.9605	77.3755	5.048	15.3715	-178.898
BVC	Both	Mat=-05	Pht=-10	Yld=080	Gpc=50	w(-5,-10,80,50)	GPC=0	0.238816	-8.2244	0.426796	-1.89984e-16	115.194	0.944765	88.9605	77.3755	5.048	15.3715	-178.898
BVC	Both	Mat=-05	Pht=-10	Yld=080	Gpc=60	w(-5,-10,80,60)	GPC=0	0.238816	-8.2244	0.426796	-3.79967e-16	115.194	0.908764	88.9605	77.3755	5.048	15.3715	-178.898
BVC	Both	Mat=-05	Pht=-10	Yld=080	Gpc=70	w(-5,-10,80,70)	GPC=0	0.238816	-8.2244	0.426796	9.49918e-17	115.194	0.855632	88.9605	77.3755	5.048	15.3715	-178.898
BVC	Both	Mat=-05	Pht=-10	Yld=080	Gpc=80	w(-5,-10,80,80)	GPC=0	0.238816	-8.2244	0.426796	-1.89984e-16	115.194	0.794176	88.9605	77.3755	5.048	15.3715	-178.898
BVC	Both	Mat=-05	Pht=-10	Yld=090	Gpc=01	w(-5,-10,90,1)	GPC=0	0.311606	-8.09424	0.446412	1.83043e-16	119.561	0.781253	88.9605	77.3755	5.048	15.3715	-95.2679
BVC	Both	Mat=-05	Pht=-10	Yld=090	Gpc=10	w(-5,-10,90,10)	GPC=0	0.311606	-8.09424	0.446412	4.57608e-16	119.561	0.835307	88.9605	77.3755	5.048	15.3715	-95.2679
BVC	Both	Mat=-05	Pht=-10	Yld=090	Gpc=20	w(-5,-10,90,20)	GPC=0	0.311606	-8.09424	0.446412	-1.83043e-16	119.561	0.89012	88.9605	77.3755	5.048	15.3715	-95.2679
BVC	Both	Mat=-05	Pht=-10	Yld=090	Gpc=30	w(-5,-10,90,30)	GPC=0	0.311606	-8.09424	0.446412	0	119.561	0.932121	88.9605	77.3755	5.048	15.3715	-95.2679
BVC	Both	Mat=-05	Pht=-10	Yld=090	Gpc=40	w(-5,-10,90,40)	GPC=0	0.311606	-8.09424	0.446412	1.83043e-16	119.561	0.953607	88.9605	77.3755	5.048	15.3715	-95.2679
BVC	Both	Mat=-05	Pht=-10	Yld=090	Gpc=50	w(-5,-10,90,50)	GPC=0	0.311606	-8.09424	0.446412	-9.15215e-17	119.561	0.949892	88.9605	77.3755	5.048	15.3715	-95.2679
BVC	Both	Mat=-05	Pht=-10	Yld=090	Gpc=60	w(-5,-10,90,60)	GPC=0	0.311606	-8.09424	0.446412	-1.69596e-16	119.561	0.921824	88.9605	77.3755	5.048	15.3715	-95.2679
BVC	Both	Mat=-05	Pht=-10	Yld=090	Gpc=70	w(-5,-10,90,70)	GPC=0	0.311606	-8.09424	0.446412	3.08146e-16	119.561	0.875303	88.9605	77.3755	5.048	15.3715	-95.2679
BVC	Both	Mat=-05	Pht=-10	Yld=090	Gpc=80	w(-5,-10,90,80)	GPC=0	0.311606	-8.09424	0.446412	1.83043e-16	119.561	0.818262	88.9605	77.3755	5.048	15.3715	-95.2679
BVC	Both	Mat=-05	Pht=-10	Yld=100	Gpc=01	w(-5,-10,100,1)	GPC=0	0.378697	-7.96132	0.463952	0	124.115	0.775149	88.9605	77.3755	5.048	15.3715	-11.6376
BVC	Both	Mat=-05	Pht=-10	Yld=100	Gpc=10	w(-5,-10,100,10)	GPC=0	0.378697	-7.96132	0.463952	-1.76328e-16	124.115	0.827341	88.9605	77.3755	5.048	15.3715	-11.6376
BVC	Both	Mat=-05	Pht=-10	Yld=100	Gpc=20	w(-5,-10,100,20)	GPC=0	0.378697	-7.96132	0.463952	-8.81638e-17	124.115	0.881208	88.9605	77.3755	5.048	15.3715	-11.6376
BVC	Both	Mat=-05	Pht=-10	Yld=100	Gpc=30	w(-5,-10,100,30)	GPC=0	0.378697	-7.96132	0.463952	8.81638e-17	124.115	0.924415	88.9605	77.3755	5.048	15.3715	-11.6376
BVC	Both	Mat=-05	Pht=-10	Yld=100	Gpc=40	w(-5,-10,100,40)	GPC=0	0.378697	-7.96132	0.463952	0	124.115	0.949914	88.9605	77.3755	5.048	15.3715	-11.6376
BVC	Both	Mat=-05	Pht=-10	Yld=100	Gpc=50	w(-5,-10,100,50)	GPC=0	0.378697	-7.96132	0.463952	0	124.115	0.952668	88.9605	77.3755	5.048	15.3715	-11.6376
BVC	Both	Mat=-05	Pht=-10	Yld=100	Gpc=60	w(-5,-10,100,60)	GPC=0	0.378697	-7.96132	0.463952	-1.76328e-16	124.115	0.932091	88.9605	77.3755	5.048	15.3715	-11.6376
BVC	Both	Mat=-05	Pht=-10	Yld=100	Gpc=70	w(-5,-10,100,70)	GPC=0	0.378697	-7.96132	0.463952	-4.40819e-16	124.115	0.892362	88.9605	77.3755	5.048	15.3715	-11.6376
BVC	Both	Mat=-05	Pht=-10	Yld=100	Gpc=80	w(-5,-10,100,80)	GPC=0	0.378697	-7.96132	0.463952	-3.52655e-16	124.115	0.840322	88.9605	77.3755	5.048	15.3715	-11.6376
BVC	Both	Mat=-05	Pht=-10	Yld=110	Gpc=01	w(-5,-10,110,1)	GPC=0	0.440472	-7.82772	0.479631	0	128.834	0.769813	88.9605	77.3755	5.048	15.3715	71.9926
BVC	Both	Mat=-05	Pht=-10	Yld=110	Gpc=10	w(-5,-10,110,10)	GPC=0	0.440472	-7.82772	0.479631	0	128.834	0.820145	88.9605	77.3755	5.048	15.3715	71.9926
BVC	Both	Mat=-05	Pht=-10	Yld=110	Gpc=20	w(-5,-10,110,20)	GPC=0	0.440472	-7.82772	0.479631	4.24671e-16	128.834	0.87283	88.9605	77.3755	5.048	15.3715	71.9926
BVC	Both	Mat=-05	Pht=-10	Yld=110	Gpc=30	w(-5,-10,110,30)	GPC=0	0.440472	-7.82772	0.479631	-1.69869e-16	128.834	0.916639	88.9605	77.3755	5.048	15.3715	71.9926
BVC	Both	Mat=-05	Pht=-10	Yld=110	Gpc=40	w(-5,-10,110,40)	GPC=0	0.440472	-7.82772	0.479631	-8.49343e-17	128.834	0.945219	88.9605	77.3755	5.048	15.3715	71.9926
BVC	Both	Mat=-05	Pht=-10	Yld=110	Gpc=50	w(-5,-10,110,50)	GPC=0	0.440472	-7.82772	0.479631	-1.69869e-16	128.834	0.953475	88.9605	77.3755	5.048	15.3715	71.9926
BVC	Both	Mat=-05	Pht=-10	Yld=110	Gpc=60	w(-5,-10,110,60)	GPC=0	0.440472	-7.82772	0.479631	2.54803e-16	128.834	0.939782	88.9605	77.3755	5.048	15.3715	71.9926
BVC	Both	Mat=-05	Pht=-10	Yld=110	Gpc=70	w(-5,-10,110,70)	GPC=0	0.440472	-7.82772	0.479631	-2.54803e-16	128.834	0.906796	88.9605	77.3755	5.048	15.3715	71.9926
BVC	Both	Mat=-05	Pht=-10	Yld=110	Gpc=80	w(-5,-10,110,80)	GPC=0	0.440472	-7.82772	0.479631	-3.39737e-16	128.834	0.860155	88.9605	77.3755	5.048	15.3715	71.9926
BVC	Both	Mat=-05	Pht=-10	Yld=120	Gpc=01	w(-5,-10,120,1)	GPC=0	0.497328	-7.69502	0.493654	1.63684e-16	133.702	0.765154	88.9075	77.845	5.0575	15.441	155.648
BVC	Both	Mat=-05	Pht=-10	Yld=120	Gpc=10	w(-5,-10,120,10)	GPC=0	0.497328	-7.69502	0.493654	0	133.702	0.813657	88.9075	77.845	5.0575	15.441	155.648
BVC	Both	Mat=-05	Pht=-10	Yld=120	Gpc=20	w(-5,-10,120,20)	GPC=0	0.497328	-7.69502	0.493654	3.27368e-16	133.702	0.86501	88.9075	77.845	5.0575	15.441	155.648
BVC	Both	Mat=-05	Pht=-10	Yld=120	Gpc=30	w(-5,-10,120,30)	GPC=0	0.497328	-7.69502	0.493654	0	133.702	0.908961	88.9075	77.845	5.0575	15.441	155.648
BVC	Both	Mat=-05	Pht=-10	Yld=120	Gpc=40	w(-5,-10,120,40)	GPC=0	0.497328	-7.69502	0.493654	1.63684e-16	133.702	0.939839	88.9075	77.845	5.0575	15.441	155.648
BVC	Both	Mat=-05	Pht=-10	Yld=120	Gpc=50	w(-5,-10,120,50)	GPC=0	0.497328	-7.69502	0.493654	8.18421e-17	133.702	0.952684	88.9075	77.845	5.0575	15.441	155.648
BVC	Both	Mat=-05	Pht=-10	Yld=120	Gpc=60	w(-5,-10,120,60)	GPC=0	0.497328	-7.69502	0.493654	3.27368e-16	133.702	0.945176	88.9075	77.845	5.0575	15.441	155.648
BVC	Both	Mat=-05	Pht=-10	Yld=120	Gpc=70	w(-5,-10,120,70)	GPC=0	0.497328	-7.69502	0.493654	-3.27368e-16	133.702	0.91869	88.9075	77.845	5.0575	15.441	155.648
BVC	Both	Mat=-05	Pht=-10	Yld=120	Gpc=80	w(-5,-10,120,80)	GPC=0	0.497328	-7.69502	0.493654	0	133.702	0.87766	88.9075	77.845	5.0575	15.441	155.648
BVC	Both	Mat=-05	Pht=-10	Yld=130	Gpc=01	w(-5,-10,130,1)	GPC=0	0.549664	-7.56439	0.506207	3.15566e-16	138.702	0.761084	89.038	78.8275	5.1525	15.4285	239.723
BVC	Both	Mat=-05	Pht=-10	Yld=130	Gpc=10	w(-5,-10,130,10)	GPC=0	0.549664	-7.56439	0.506207	0	138.702	0.807814	89.038	78.8275	5.1525	15.4285	239.723
BVC	Both	Mat=-05	Pht=-10	Yld=130	Gpc=20	w(-5,-10,130,20)	GPC=0	0.549664	-7.56439	0.506207	1.57783e-16	138.702	0.857748	89.038	78.8275	5.1525	15.4285	239.723
BVC	Both	Mat=-05	Pht=-10	Yld=130	Gpc=30	w(-5,-10,130,30)	GPC=0	0.549664	-7.56439	0.506207	1.57783e-16	138.702	0.901496	89.038	78.8275	5.1525	15.4285	239.723
BVC	Both	Mat=-05	Pht=-10	Yld=130	Gpc=40	w(-5,-10,130,40)	GPC=0	0.549664	-7.56439	0.506207	1.57783e-16	138.702	0.934024	89.038	78.8275	5.1525	15.4285	239.723
BVC	Both	Mat=-05	Pht=-10	Yld=130	Gpc=50	w(-5,-10,130,50)	GPC=0	0.549664	-7.56439	0.506207	1.57783e-16	138.702	0.950633	89.038	78.8275	5.1525	15.4285	239.723
BVC	Both	Mat=-05	Pht=-10	Yld=130	Gpc=60	w(-5,-10,130,60)	GPC=0	0.549664	-7.56439	0.506207	-3.15566e-16	138.702	0.948577	89.038	78.8275	5.1525	15.4285	239.723
BVC	Both	Mat=-05	Pht=-10	Yld=130	Gpc=70	w(-5,-10,130,70)	GPC=0	0.549664	-7.56439	0.506207	3.15566e-16	138.702	0.928209	89.038	78.8275	5.1525	15.4285	239.723
BVC	Both	Mat=-05	Pht=-10	Yld=130	Gpc=80	w(-5,-10,130,80)	GPC=0	0.549664	-7.56439	0.506207	-3.15566e-16	138.702	0.892826	89.038	78.8275	5.1525	15.4285	239.723
BVC	Both	Mat=-05	Pht=-10	Yld=140	Gpc=01	w(-5,-10,140,1)	GPC=0	0.597862	-7.4367	0.517458	-3.04333e-16	143.822	0.757527	89.2465	78.756	5.1985	15.3255	324.44
BVC	Both	Mat=-05	Pht=-10	Yld=140	Gpc=10	w(-5,-10,140,10)	GPC=0	0.597862	-7.4367	0.517458	3.04333e-16	143.822	0.802552	89.2465	78.756	5.1985	15.3255	324.44
BVC	Both	Mat=-05	Pht=-10	Yld=140	Gpc=20	w(-5,-10,140,20)	GPC=0	0.597862	-7.4367	0.517458	3.04333e-16	143.822	0.851027	89.2465	78.756	5.1985	15.3255	324.44
BVC	Both	Mat=-05	Pht=-10	Yld=140	Gpc=30	w(-5,-10,140,30)	GPC=0	0.597862	-7.4367	0.517458	3.04333e-16	143.822	0.894318	89.2465	78.756	5.1985	15.3255	324.44
BVC	Both	Mat=-05	Pht=-10	Yld=140	Gpc=40	w(-5,-10,140,40)	GPC=0	0.597862	-7.4367	0.517458	3.04333e-16	143.822	0.927973	89.2465	78.756	5.1985	15.3255	324.44
BVC	Both	Mat=-05	Pht=-10	Yld=140	Gpc=50	w(-5,-10,140,50)	GPC=0	0.597862	-7.4367	0.517458	0	143.822	0.947618	89.2465	78.756	5.1985	15.3255	324.44
BVC	Both	Mat=-05	Pht=-10	Yld=140	Gpc=60	w(-5,-10,140,60)	GPC=0	0.597862	-7.4367	0.517458	0	143.822	0.95029	89.2465	78.756	5.1985	15.3255	324.44
BVC	Both	Mat=-05	Pht=-10	Yld=140	Gpc=70	w(-5,-10,140,70)	GPC=0	0.597862	-7.4367	0.517458	0	143.822	0.935561	89.2465	78.756	5.1985	15.3255	324.44
BVC	Both	Mat=-05	Pht=-10	Yld=140	Gpc=80	w(-5,-10,140,80)	GPC=0	0.597862	-7.4367	0.517458	0	143.822	0.905716	89.2465	78.756	5.1985	15.3255	324.44
BVC	Both	Mat=-05	Pht=-10	Yld=150	Gpc=01	w(-5,-10,150,1)	GPC=0	0.642288	-7.31256	0.527558	1.46831e-16	149.048	0.754417	89.3395	78.7475	5.2045	15.3165	409.239
BVC	Both	Mat=-05	Pht=-10	Yld=150	Gpc=10	w(-5,-10,150,10)	GPC=0	0.642288	-7.31256	0.527558	1.46831e-16	149.048	0.797811	89.3395	78.7475	5.2045	15.3165	409.239
BVC	Both	Mat=-05	Pht=-10	Yld=150	Gpc=20	w(-5,-10,150,20)	GPC=0	0.642288	-7.31256	0.527558	0	149.048	0.84482	89.3395	78.7475	5.2045	15.3165	409.239
BVC	Both	Mat=-05	Pht=-10	Yld=150	Gpc=30	w(-5,-10,150,30)	GPC=0	0.642288	-7.31256	0.527558	0	149.048	0.887471	89.3395	78.7475	5.2045	15.3165	409.239
BVC	Both	Mat=-05	Pht=-10	Yld=150	Gpc=40	w(-5,-10,150,40)	GPC=0	0.642288	-7.31256	0.527558	0	149.048	0.921833	89.3395	78.7475	5.2045	15.3165	409.239
BVC	Both	Mat=-05	Pht=-10	Yld=150	Gpc=50	w(-5,-10,150,50)	GPC=0	0.642288	-7.31256	0.527558	2.93663e-16	149.048	0.943887	89.3395	78.7475	5.2045	15.3165	409.239
BVC	Both	Mat=-05	Pht=-10	Yld=150	Gpc=60	w(-5,-10,150,60)	GPC=0	0.642288	-7.31256	0.527558	0	149.048	0.950603	89.3395	78.7475	5.2045	15.3165	409.239
BVC	Both	Mat=-05	Pht=-10	Yld=150	Gpc=70	w(-5,-10,150,70)	GPC=0	0.642288	-7.31256	0.527558	1.46831e-16	149.048	0.940985	89.3395	78.7475	5.2045	15.3165	409.239
BVC	Both	Mat=-05	Pht=-10	Yld=150	Gpc=80	w(-5,-10,150,80)	GPC=0	0.642288	-7.31256	0.527558	0	149.048	0.91645	89.3395	78.7475	5.2045	15.3165	409.239
BVC	Both	Mat=-05	Pht=-15	Yld=001	Gpc=01	w(-5,-15,1,1)	GPC=0	-0.250302	-8.84673	0.194476	0	134.147	0.860517	88.926	76.359	4.869	15.1765	-1000.75
BVC	Both	Mat=-05	Pht=-15	Yld=001	Gpc=10	w(-5,-15,1,10)	GPC=0	-0.250302	-8.84673	0.194476	1.22356e-16	134.147	0.902422	88.926	76.359	4.869	15.1765	-1000.75
BVC	Both	Mat=-05	Pht=-15	Yld=001	Gpc=20	w(-5,-15,1,20)	GPC=0	-0.250302	-8.84673	0.194476	0	134.147	0.937807	88.926	76.359	4.869	15.1765	-1000.75
BVC	Both	Mat=-05	Pht=-15	Yld=001	Gpc=30	w(-5,-15,1,30)	GPC=0	-0.250302	-8.84673	0.194476	0	134.147	0.956207	88.926	76.359	4.869	15.1765	-1000.75
BVC	Both	Mat=-05	Pht=-15	Yld=001	Gpc=40	w(-5,-15,1,40)	GPC=0	-0.250302	-8.84673	0.194476	-1.22356e-16	134.147	0.954356	88.926	76.359	4.869	15.1765	-1000.75
BVC	Both	Mat=-05	Pht=-15	Yld=001	Gpc=50	w(-5,-15,1,50)	GPC=0	-0.250302	-8.84673	0.194476	-1.22356e-16	134.147	0.932599	88.926	76.359	4.869	15.1765	-1000.75
BVC	Both	Mat=-05	Pht=-15	Yld=001	Gpc=60	w(-5,-15,1,60)	GPC=0	-0.250302	-8.84673	0.194476	-2.44712e-16	134.147	0.894723	88.926	76.359	4.869	15.1765	-1000.75
BVC	Both	Mat=-05	Pht=-15	Yld=001	Gpc=70	w(-5,-15,1,70)	GPC=0	-0.250302	-8.84673	0.194476	-3.99182e-17	134.147	0.846315	88.926	76.359	4.869	15.1765	-1000.75
BVC	Both	Mat=-05	Pht=-15	Yld=001	Gpc=80	w(-5,-15,1,80)	GPC=0	-0.250302	-8.84673	0.194476	-3.26282e-16	134.147	0.792869	88.926	76.359	4.869	15.1765	-1000.75
BVC	Both	Mat=-05	Pht=-15	Yld=010	Gpc=01	w(-5,-15,10,1)	GPC=0	-0.182382	-8.86019	0.219666	1.60905e-16	136.011	0.851406	89.121	76.367	4.898	15.204	-927.065
BVC	Both	Mat=-05	Pht=-15	Yld=010	Gpc=10	w(-5,-15,10,10)	GPC=0	-0.182382	-8.86019	0.219666	-4.82714e-16	136.011	0.894201	89.121	76.367	4.898	15.204	-927.065
BVC	Both	Mat=-05	Pht=-15	Yld=010	Gpc=20	w(-5,-15,10,20)	GPC=0	-0.182382	-8.86019	0.219666	2.6147e-16	136.011	0.931937	89.121	76.367	4.898	15.204	-927.065
BVC	Both	Mat=-05	Pht=-15	Yld=010	Gpc=30	w(-5,-15,10,30)	GPC=0	-0.182382	-8.86019	0.219666	4.02262e-17	136.011	0.954132	89.121	76.367	4.898	15.204	-927.065
BVC	Both	Mat=-05	Pht=-15	Yld=010	Gpc=40	w(-5,-15,10,40)	GPC=0	-0.182382	-8.86019	0.219666	-1.60905e-16	136.011	0.957038	89.121	76.367	4.898	15.204	-927.065
BVC	Both	Mat=-05	Pht=-15	Yld=010	Gpc=50	w(-5,-15,10,50)	GPC=0	-0.182382	-8.86019	0.219666	-3.01697e-16	136.011	0.940129	89.121	76.367	4.898	15.204	-927.065
BVC	Both	Mat=-05	Pht=-15	Yld=010	Gpc=60	w(-5,-15,10,60)	GPC=0	-0.182382	-8.86019	0.219666	3.2181e-16	136.011	0.906348	89.121	76.367	4.898	15.204	-927.065
BVC	Both	Mat=-05	Pht=-15	Yld=010	Gpc=70	w(-5,-15,10,70)	GPC=0	-0.182382	-8.86019	0.219666	-1.60905e-16	136.011	0.860812	89.121	76.367	4.898	15.204	-927.065
BVC	Both	Mat=-05	Pht=-15	Yld=010	Gpc=80	w(-5,-15,10,80)	GPC=0	-0.182382	-8.86019	0.219666	-3.62036e-16	136.011	0.808977	89.121	76.367	4.898	15.204	-927.065
BVC	Both	Mat=-05	Pht=-15	Yld=020	Gpc=01	w(-5,-15,20,1)	GPC=0	-0.10886	-8.85805	0.246393	2.86725e-16	138.343	0.841629	89.138	76.2885	4.9255	15.161	-845.053
BVC	Both	Mat=-05	Pht=-15	Yld=020	Gpc=10	w(-5,-15,20,10)	GPC=0	-0.10886	-8.85805	0.246393	4.7458e-16	138.343	0.885008	89.138	76.2885	4.9255	15.161	-845.053
BVC	Both	Mat=-05	Pht=-15	Yld=020	Gpc=20	w(-5,-15,20,20)	GPC=0	-0.10886	-8.85805	0.246393	3.85596e-16	138.343	0.924798	89.138	76.2885	4.9255	15.161	-845.053
BVC	Both	Mat=-05	Pht=-15	Yld=020	Gpc=30	w(-5,-15,20,30)	GPC=0	-0.10886	-8.85805	0.246393	3.16386e-16	138.343	0.950665	89.138	76.2885	4.9255	15.161	-845.053
BVC	Both	Mat=-05	Pht=-15	Yld=020	Gpc=40	w(-5,-15,20,40)	GPC=0	-0.10886	-8.85805	0.246393	1.6808e-16	138.343	0.958504	89.138	76.2885	4.9255	15.161	-845.053
BVC	Both	Mat=-05	Pht=-15	Yld=020	Gpc=50	w(-5,-15,20,50)	GPC=0	-0.10886	-8.85805	0.246393	1.58193e-16	138.343	0.946953	89.138	76.2885	4.9255	15.161	-845.053
BVC	Both	Mat=-05	Pht=-15	Yld=020	Gpc=60	w(-5,-15,20,60)	GPC=0	-0.10886	-8.85805	0.246393	0	138.343	0.918	89.138	76.2885	4.9255	15.161	-845.053
BVC	Both	Mat=-05	Pht=-15	Yld=020	Gpc=70	w(-5,-15,20,70)	GPC=0	-0.10886	-8.85805	0.246393	-4.64692e-16	138.343	0.876108	89.138	76.2885	4.9255	15.161	-845.053
BVC	Both	Mat=-05	Pht=-15	Yld=020	Gpc=80	w(-5,-15,20,80)	GPC=0	-0.10886	-8.85805	0.246393	0	138.343	0.826545	89.138	76.2885	4.9255	15.161	-845.053
BVC	Both	Mat=-05	Pht=-15	Yld=030	Gpc=01	w(-5,-15,30,1)	GPC=0	-0.0377064	-8.83961	0.271731	2.20794e-16	140.935	0.832309	89.069	76.6625	4.975	15.26	-762.545
BVC	Both	Mat=-05	Pht=-15	Yld=030	Gpc=10	w(-5,-15,30,10)	GPC=0	-0.0377064	-8.83961	0.271731	-1.77121e-16	140.935	0.875909	89.069	76.6625	4.975	15.26	-762.545
BVC	Both	Mat=-05	Pht=-15	Yld=030	Gpc=20	w(-5,-15,30,20)	GPC=0	-0.0377064	-8.83961	0.271731	2.98436e-16	140.935	0.917213	89.069	76.6625	4.975	15.26	-762.545
BVC	Both	Mat=-05	Pht=-15	Yld=030	Gpc=30	w(-5,-15,30,30)	GPC=0	-0.0377064	-8.83961	0.271731	-1.43152e-16	140.935	0.946169	89.069	76.6625	4.975	15.26	-762.545
BVC	Both	Mat=-05	Pht=-15	Yld=030	Gpc=40	w(-5,-15,30,40)	GPC=0	-0.0377064	-8.83961	0.271731	-1.55284e-16	140.935	0.95849	89.069	76.6625	4.975	15.26	-762.545
BVC	Both	Mat=-05	Pht=-15	Yld=030	Gpc=50	w(-5,-15,30,50)	GPC=0	-0.0377064	-8.83961	0.271731	0	140.935	0.952136	89.069	76.6625	4.975	15.26	-762.545
BVC	Both	Mat=-05	Pht=-15	Yld=030	Gpc=60	w(-5,-15,30,60)	GPC=0	-0.0377064	-8.83961	0.271731	-1.55284e-16	140.935	0.928176	89.069	76.6625	4.975	15.26	-762.545
BVC	Both	Mat=-05	Pht=-15	Yld=030	Gpc=70	w(-5,-15,30,70)	GPC=0	-0.0377064	-8.83961	0.271731	8.97736e-17	140.935	0.890325	89.069	76.6625	4.975	15.26	-762.545
BVC	Both	Mat=-05	Pht=-15	Yld=030	Gpc=80	w(-5,-15,30,80)	GPC=0	-0.0377064	-8.83961	0.271731	0	140.935	0.843515	89.069	76.6625	4.975	15.26	-762.545
BVC	Both	Mat=-05	Pht=-15	Yld=040	Gpc=01	w(-5,-15,40,1)	GPC=0	0.0308249	-8.80673	0.295646	-1.52219e-16	143.773	0.823512	88.9985	76.721	4.9955	15.255	-679.684
BVC	Both	Mat=-05	Pht=-15	Yld=040	Gpc=10	w(-5,-15,40,10)	GPC=0	0.0308249	-8.80673	0.295646	7.61093e-17	143.773	0.867031	88.9985	76.721	4.9955	15.255	-679.684
BVC	Both	Mat=-05	Pht=-15	Yld=040	Gpc=20	w(-5,-15,40,20)	GPC=0	0.0308249	-8.80673	0.295646	7.61093e-17	143.773	0.909372	88.9985	76.721	4.9955	15.255	-679.684
BVC	Both	Mat=-05	Pht=-15	Yld=040	Gpc=30	w(-5,-15,40,30)	GPC=0	0.0308249	-8.80673	0.295646	9.51367e-17	143.773	0.940853	88.9985	76.721	4.9955	15.255	-679.684
BVC	Both	Mat=-05	Pht=-15	Yld=040	Gpc=40	w(-5,-15,40,40)	GPC=0	0.0308249	-8.80673	0.295646	5.7082e-17	143.773	0.957152	88.9985	76.721	4.9955	15.255	-679.684
BVC	Both	Mat=-05	Pht=-15	Yld=040	Gpc=50	w(-5,-15,40,50)	GPC=0	0.0308249	-8.80673	0.295646	-2.47355e-16	143.773	0.955718	88.9985	76.721	4.9955	15.255	-679.684
BVC	Both	Mat=-05	Pht=-15	Yld=040	Gpc=60	w(-5,-15,40,60)	GPC=0	0.0308249	-8.80673	0.295646	1.52219e-16	143.773	0.936784	88.9985	76.721	4.9955	15.255	-679.684
BVC	Both	Mat=-05	Pht=-15	Yld=040	Gpc=70	w(-5,-15,40,70)	GPC=0	0.0308249	-8.80673	0.295646	1.31499e-16	143.773	0.903271	88.9985	76.721	4.9955	15.255	-679.684
BVC	Both	Mat=-05	Pht=-15	Yld=040	Gpc=80	w(-5,-15,40,80)	GPC=0	0.0308249	-8.80673	0.295646	-1.72938e-16	143.773	0.859648	88.9985	76.721	4.9955	15.255	-679.684
BVC	Both	Mat=-05	Pht=-15	Yld=050	Gpc=01	w(-5,-15,50,1)	GPC=0	0.0965502	-8.76126	0.318132	1.46274e-16	146.843	0.815274	89.1595	76.6445	5.0455	15.1965	-596.684
BVC	Both	Mat=-05	Pht=-15	Yld=050	Gpc=10	w(-5,-15,50,10)	GPC=0	0.0965502	-8.76126	0.318132	2.42184e-16	146.843	0.85847	89.1595	76.6445	5.0455	15.1965	-596.684
BVC	Both	Mat=-05	Pht=-15	Yld=050	Gpc=20	w(-5,-15,50,20)	GPC=0	0.0965502	-8.76126	0.318132	2.23554e-16	146.843	0.901437	89.1595	76.6445	5.0455	15.1965	-596.684
BVC	Both	Mat=-05	Pht=-15	Yld=050	Gpc=30	w(-5,-15,50,30)	GPC=0	0.0965502	-8.76126	0.318132	0	146.843	0.934916	89.1595	76.6445	5.0455	15.1965	-596.684
BVC	Both	Mat=-05	Pht=-15	Yld=050	Gpc=40	w(-5,-15,50,40)	GPC=0	0.0965502	-8.76126	0.318132	-1.49036e-16	146.843	0.954668	89.1595	76.6445	5.0455	15.1965	-596.684
BVC	Both	Mat=-05	Pht=-15	Yld=050	Gpc=50	w(-5,-15,50,50)	GPC=0	0.0965502	-8.76126	0.318132	0	146.843	0.957791	89.1595	76.6445	5.0455	15.1965	-596.684
BVC	Both	Mat=-05	Pht=-15	Yld=050	Gpc=60	w(-5,-15,50,60)	GPC=0	0.0965502	-8.76126	0.318132	0	146.843	0.943796	89.1595	76.6445	5.0455	15.1965	-596.684
BVC	Both	Mat=-05	Pht=-15	Yld=050	Gpc=70	w(-5,-15,50,70)	GPC=0	0.0965502	-8.76126	0.318132	2.98072e-16	146.843	0.914807	89.1595	76.6445	5.0455	15.1965	-596.684
BVC	Both	Mat=-05	Pht=-15	Yld=050	Gpc=80	w(-5,-15,50,80)	GPC=0	0.0965502	-8.76126	0.318132	1.49036e-16	146.843	0.874736	89.1595	76.6445	5.0455	15.1965	-596.684
BVC	Both	Mat=-05	Pht=-15	Yld=060	Gpc=01	w(-5,-15,60,1)	GPC=0	0.159352	-8.70501	0.339205	7.28862e-17	150.131	0.807614	89.1515	76.959	5.048	15.2895	-513.433
BVC	Both	Mat=-05	Pht=-15	Yld=060	Gpc=10	w(-5,-15,60,10)	GPC=0	0.159352	-8.70501	0.339205	0	150.131	0.850295	89.1515	76.959	5.048	15.2895	-513.433
BVC	Both	Mat=-05	Pht=-15	Yld=060	Gpc=20	w(-5,-15,60,20)	GPC=0	0.159352	-8.70501	0.339205	0	150.131	0.89354	89.1515	76.959	5.048	15.2895	-513.433
BVC	Both	Mat=-05	Pht=-15	Yld=060	Gpc=30	w(-5,-15,60,30)	GPC=0	0.159352	-8.70501	0.339205	1.45772e-16	150.131	0.928544	89.1515	76.959	5.048	15.2895	-513.433
BVC	Both	Mat=-05	Pht=-15	Yld=060	Gpc=40	w(-5,-15,60,40)	GPC=0	0.159352	-8.70501	0.339205	3.64431e-17	150.131	0.951229	89.1515	76.959	5.048	15.2895	-513.433
BVC	Both	Mat=-05	Pht=-15	Yld=060	Gpc=50	w(-5,-15,60,50)	GPC=0	0.159352	-8.70501	0.339205	-3.64431e-17	150.131	0.958486	89.1515	76.959	5.048	15.2895	-513.433
BVC	Both	Mat=-05	Pht=-15	Yld=060	Gpc=60	w(-5,-15,60,60)	GPC=0	0.159352	-8.70501	0.339205	-2.55102e-16	150.131	0.949236	89.1515	76.959	5.048	15.2895	-513.433
BVC	Both	Mat=-05	Pht=-15	Yld=060	Gpc=70	w(-5,-15,60,70)	GPC=0	0.159352	-8.70501	0.339205	0	150.131	0.924846	89.1515	76.959	5.048	15.2895	-513.433
BVC	Both	Mat=-05	Pht=-15	Yld=060	Gpc=80	w(-5,-15,60,80)	GPC=0	0.159352	-8.70501	0.339205	0	150.131	0.888609	89.1515	76.959	5.048	15.2895	-513.433
BVC	Both	Mat=-05	Pht=-15	Yld=070	Gpc=01	w(-5,-15,70,1)	GPC=0	0.219171	-8.63969	0.358898	2.84918e-16	153.622	0.800529	89.1515	76.959	5.048	15.2895	-429.972
BVC	Both	Mat=-05	Pht=-15	Yld=070	Gpc=10	w(-5,-15,70,10)	GPC=0	0.219171	-8.63969	0.358898	-7.12296e-17	153.622	0.842551	89.1515	76.959	5.048	15.2895	-429.972
BVC	Both	Mat=-05	Pht=-15	Yld=070	Gpc=20	w(-5,-15,70,20)	GPC=0	0.219171	-8.63969	0.358898	2.84918e-16	153.622	0.885788	89.1515	76.959	5.048	15.2895	-429.972
BVC	Both	Mat=-05	Pht=-15	Yld=070	Gpc=30	w(-5,-15,70,30)	GPC=0	0.219171	-8.63969	0.358898	0	153.622	0.921897	89.1515	76.959	5.048	15.2895	-429.972
BVC	Both	Mat=-05	Pht=-15	Yld=070	Gpc=40	w(-5,-15,70,40)	GPC=0	0.219171	-8.63969	0.358898	0	153.622	0.94702	89.1515	76.959	5.048	15.2895	-429.972
BVC	Both	Mat=-05	Pht=-15	Yld=070	Gpc=50	w(-5,-15,70,50)	GPC=0	0.219171	-8.63969	0.358898	-1.35816e-16	153.622	0.957959	89.1515	76.959	5.048	15.2895	-429.972
BVC	Both	Mat=-05	Pht=-15	Yld=070	Gpc=60	w(-5,-15,70,60)	GPC=0	0.219171	-8.63969	0.358898	1.06844e-16	153.622	0.953176	89.1515	76.959	5.048	15.2895	-429.972
BVC	Both	Mat=-05	Pht=-15	Yld=070	Gpc=70	w(-5,-15,70,70)	GPC=0	0.219171	-8.63969	0.358898	-7.12296e-17	153.622	0.933355	89.1515	76.959	5.048	15.2895	-429.972
BVC	Both	Mat=-05	Pht=-15	Yld=070	Gpc=80	w(-5,-15,70,80)	GPC=0	0.219171	-8.63969	0.358898	-1.06844e-16	153.622	0.901145	89.1515	76.959	5.048	15.2895	-429.972
BVC	Both	Mat=-05	Pht=-15	Yld=080	Gpc=01	w(-5,-15,80,1)	GPC=0	0.275997	-8.5669	0.377258	4.17374e-16	157.304	0.794006	89.1515	76.959	5.048	15.2895	-346.512
BVC	Both	Mat=-05	Pht=-15	Yld=080	Gpc=10	w(-5,-15,80,10)	GPC=0	0.275997	-8.5669	0.377258	2.78249e-16	157.304	0.83526	89.1515	76.959	5.048	15.2895	-346.512
BVC	Both	Mat=-05	Pht=-15	Yld=080	Gpc=20	w(-5,-15,80,20)	GPC=0	0.275997	-8.5669	0.377258	0	157.304	0.87826	89.1515	76.959	5.048	15.2895	-346.512
BVC	Both	Mat=-05	Pht=-15	Yld=080	Gpc=30	w(-5,-15,80,30)	GPC=0	0.275997	-8.5669	0.377258	0	157.304	0.915113	89.1515	76.959	5.048	15.2895	-346.512
BVC	Both	Mat=-05	Pht=-15	Yld=080	Gpc=40	w(-5,-15,80,40)	GPC=0	0.275997	-8.5669	0.377258	2.78249e-16	157.304	0.942217	89.1515	76.959	5.048	15.2895	-346.512
BVC	Both	Mat=-05	Pht=-15	Yld=080	Gpc=50	w(-5,-15,80,50)	GPC=0	0.275997	-8.5669	0.377258	0	157.304	0.956377	89.1515	76.959	5.048	15.2895	-346.512
BVC	Both	Mat=-05	Pht=-15	Yld=080	Gpc=60	w(-5,-15,80,60)	GPC=0	0.275997	-8.5669	0.377258	6.95624e-17	157.304	0.955725	89.1515	76.959	5.048	15.2895	-346.512
BVC	Both	Mat=-05	Pht=-15	Yld=080	Gpc=70	w(-5,-15,80,70)	GPC=0	0.275997	-8.5669	0.377258	-2.78249e-16	157.304	0.940348	89.1515	76.959	5.048	15.2895	-346.512
BVC	Both	Mat=-05	Pht=-15	Yld=080	Gpc=80	w(-5,-15,80,80)	GPC=0	0.275997	-8.5669	0.377258	0	157.304	0.912264	89.1515	76.959	5.048	15.2895	-346.512
BVC	Both	Mat=-05	Pht=-15	Yld=090	Gpc=01	w(-5,-15,90,1)	GPC=0	0.329861	-8.4881	0.394345	0	161.163	0.788023	89.1515	76.959	5.048	15.2895	-263.051
BVC	Both	Mat=-05	Pht=-15	Yld=090	Gpc=10	w(-5,-15,90,10)	GPC=0	0.329861	-8.4881	0.394345	3.39483e-16	161.163	0.828432	89.1515	76.959	5.048	15.2895	-263.051
BVC	Both	Mat=-05	Pht=-15	Yld=090	Gpc=20	w(-5,-15,90,20)	GPC=0	0.329861	-8.4881	0.394345	-6.78967e-17	161.163	0.871012	89.1515	76.959	5.048	15.2895	-263.051
BVC	Both	Mat=-05	Pht=-15	Yld=090	Gpc=30	w(-5,-15,90,30)	GPC=0	0.329861	-8.4881	0.394345	-1.35793e-16	161.163	0.908304	89.1515	76.959	5.048	15.2895	-263.051
BVC	Both	Mat=-05	Pht=-15	Yld=090	Gpc=40	w(-5,-15,90,40)	GPC=0	0.329861	-8.4881	0.394345	-2.71587e-16	161.163	0.936977	89.1515	76.959	5.048	15.2895	-263.051
BVC	Both	Mat=-05	Pht=-15	Yld=090	Gpc=50	w(-5,-15,90,50)	GPC=0	0.329861	-8.4881	0.394345	-2.71587e-16	161.163	0.95391	89.1515	76.959	5.048	15.2895	-263.051
BVC	Both	Mat=-05	Pht=-15	Yld=090	Gpc=60	w(-5,-15,90,60)	GPC=0	0.329861	-8.4881	0.394345	-3.39483e-16	161.163	0.957013	89.1515	76.959	5.048	15.2895	-263.051
BVC	Both	Mat=-05	Pht=-15	Yld=090	Gpc=70	w(-5,-15,90,70)	GPC=0	0.329861	-8.4881	0.394345	3.39483e-16	161.163	0.945881	89.1515	76.959	5.048	15.2895	-263.051
BVC	Both	Mat=-05	Pht=-15	Yld=090	Gpc=80	w(-5,-15,90,80)	GPC=0	0.329861	-8.4881	0.394345	0	161.163	0.921935	89.1515	76.959	5.048	15.2895	-263.051
BVC	Both	Mat=-05	Pht=-15	Yld=100	Gpc=01	w(-5,-15,100,1)	GPC=0	0.380825	-8.40459	0.410223	0	165.187	0.782551	89.1515	76.959	5.048	15.2895	-179.59
BVC	Both	Mat=-05	Pht=-15	Yld=100	Gpc=10	w(-5,-15,100,10)	GPC=0	0.380825	-8.40459	0.410223	0	165.187	0.822064	89.1515	76.959	5.048	15.2895	-179.59
BVC	Both	Mat=-05	Pht=-15	Yld=100	Gpc=20	w(-5,-15,100,20)	GPC=0	0.380825	-8.40459	0.410223	1.32486e-16	165.187	0.864084	89.1515	76.959	5.048	15.2895	-179.59
BVC	Both	Mat=-05	Pht=-15	Yld=100	Gpc=30	w(-5,-15,100,30)	GPC=0	0.380825	-8.40459	0.410223	0	165.187	0.901562	89.1515	76.959	5.048	15.2895	-179.59
BVC	Both	Mat=-05	Pht=-15	Yld=100	Gpc=40	w(-5,-15,100,40)	GPC=0	0.380825	-8.40459	0.410223	0	165.187	0.931438	89.1515	76.959	5.048	15.2895	-179.59
BVC	Both	Mat=-05	Pht=-15	Yld=100	Gpc=50	w(-5,-15,100,50)	GPC=0	0.380825	-8.40459	0.410223	2.64971e-16	165.187	0.95072	89.1515	76.959	5.048	15.2895	-179.59
BVC	Both	Mat=-05	Pht=-15	Yld=100	Gpc=60	w(-5,-15,100,60)	GPC=0	0.380825	-8.40459	0.410223	6.62428e-17	165.187	0.957187	89.1515	76.959	5.048	15.2895	-179.59
BVC	Both	Mat=-05	Pht=-15	Yld=100	Gpc=70	w(-5,-15,100,70)	GPC=0	0.380825	-8.40459	0.410223	0	165.187	0.950042	89.1515	76.959	5.048	15.2895	-179.59
BVC	Both	Mat=-05	Pht=-15	Yld=100	Gpc=80	w(-5,-15,100,80)	GPC=0	0.380825	-8.40459	0.410223	0	165.187	0.930164	89.1515	76.959	5.048	15.2895	-179.59
BVC	Both	Mat=-05	Pht=-15	Yld=110	Gpc=01	w(-5,-15,110,1)	GPC=0	0.428977	-8.31753	0.424961	5.16873e-16	169.364	0.777558	89.1515	76.959	5.048	15.2895	-96.1297
BVC	Both	Mat=-05	Pht=-15	Yld=110	Gpc=10	w(-5,-15,110,10)	GPC=0	0.428977	-8.31753	0.424961	0	169.364	0.816144	89.1515	76.959	5.048	15.2895	-96.1297
BVC	Both	Mat=-05	Pht=-15	Yld=110	Gpc=20	w(-5,-15,110,20)	GPC=0	0.428977	-8.31753	0.424961	0	169.364	0.857497	89.1515	76.959	5.048	15.2895	-96.1297
BVC	Both	Mat=-05	Pht=-15	Yld=110	Gpc=30	w(-5,-15,110,30)	GPC=0	0.428977	-8.31753	0.424961	0	169.364	0.894953	89.1515	76.959	5.048	15.2895	-96.1297
BVC	Both	Mat=-05	Pht=-15	Yld=110	Gpc=40	w(-5,-15,110,40)	GPC=0	0.428977	-8.31753	0.424961	3.23046e-16	169.364	0.925718	89.1515	76.959	5.048	15.2895	-96.1297
BVC	Both	Mat=-05	Pht=-15	Yld=110	Gpc=50	w(-5,-15,110,50)	GPC=0	0.428977	-8.31753	0.424961	1.93827e-16	169.364	0.946956	89.1515	76.959	5.048	15.2895	-96.1297
BVC	Both	Mat=-05	Pht=-15	Yld=110	Gpc=60	w(-5,-15,110,60)	GPC=0	0.428977	-8.31753	0.424961	2.58436e-16	169.364	0.956396	89.1515	76.959	5.048	15.2895	-96.1297
BVC	Both	Mat=-05	Pht=-15	Yld=110	Gpc=70	w(-5,-15,110,70)	GPC=0	0.428977	-8.31753	0.424961	-1.93827e-16	169.364	0.952939	89.1515	76.959	5.048	15.2895	-96.1297
BVC	Both	Mat=-05	Pht=-15	Yld=110	Gpc=80	w(-5,-15,110,80)	GPC=0	0.428977	-8.31753	0.424961	5.16873e-16	169.364	0.936995	89.1515	76.959	5.048	15.2895	-96.1297
BVC	Both	Mat=-05	Pht=-15	Yld=120	Gpc=01	w(-5,-15,120,1)	GPC=0	0.474423	-8.22794	0.438631	-8.88918e-17	173.683	0.773009	89.1515	76.959	5.048	15.2895	-12.6691
BVC	Both	Mat=-05	Pht=-15	Yld=120	Gpc=10	w(-5,-15,120,10)	GPC=0	0.474423	-8.22794	0.438631	0	173.683	0.810653	89.1515	76.959	5.048	15.2895	-12.6691
BVC	Both	Mat=-05	Pht=-15	Yld=120	Gpc=20	w(-5,-15,120,20)	GPC=0	0.474423	-8.22794	0.438631	1.26005e-16	173.683	0.851262	89.1515	76.959	5.048	15.2895	-12.6691
BVC	Both	Mat=-05	Pht=-15	Yld=120	Gpc=30	w(-5,-15,120,30)	GPC=0	0.474423	-8.22794	0.438631	2.5201e-16	173.683	0.88853	89.1515	76.959	5.048	15.2895	-12.6691
BVC	Both	Mat=-05	Pht=-15	Yld=120	Gpc=40	w(-5,-15,120,40)	GPC=0	0.474423	-8.22794	0.438631	-1.26005e-16	173.683	0.919914	89.1515	76.959	5.048	15.2895	-12.6691
BVC	Both	Mat=-05	Pht=-15	Yld=120	Gpc=50	w(-5,-15,120,50)	GPC=0	0.474423	-8.22794	0.438631	6.30025e-17	173.683	0.942754	89.1515	76.959	5.048	15.2895	-12.6691
BVC	Both	Mat=-05	Pht=-15	Yld=120	Gpc=60	w(-5,-15,120,60)	GPC=0	0.474423	-8.22794	0.438631	-1.89008e-16	173.683	0.954787	89.1515	76.959	5.048	15.2895	-12.6691
BVC	Both	Mat=-05	Pht=-15	Yld=120	Gpc=70	w(-5,-15,120,70)	GPC=0	0.474423	-8.22794	0.438631	0	173.683	0.954698	89.1515	76.959	5.048	15.2895	-12.6691
BVC	Both	Mat=-05	Pht=-15	Yld=120	Gpc=80	w(-5,-15,120,80)	GPC=0	0.474423	-8.22794	0.438631	0	173.683	0.942498	89.1515	76.959	5.048	15.2895	-12.6691
BVC	Both	Mat=-05	Pht=-15	Yld=130	Gpc=01	w(-5,-15,130,1)	GPC=0	0.517282	-8.13667	0.451304	1.22857e-16	178.133	0.768872	89.2825	76.9765	5.073	15.258	70.896
BVC	Both	Mat=-05	Pht=-15	Yld=130	Gpc=10	w(-5,-15,130,10)	GPC=0	0.517282	-8.13667	0.451304	2.45714e-16	178.133	0.805571	89.2825	76.9765	5.073	15.258	70.896
BVC	Both	Mat=-05	Pht=-15	Yld=130	Gpc=20	w(-5,-15,130,20)	GPC=0	0.517282	-8.13667	0.451304	0	178.133	0.845382	89.2825	76.9765	5.073	15.258	70.896
BVC	Both	Mat=-05	Pht=-15	Yld=130	Gpc=30	w(-5,-15,130,30)	GPC=0	0.517282	-8.13667	0.451304	2.45714e-16	178.133	0.882328	89.2825	76.9765	5.073	15.258	70.896
BVC	Both	Mat=-05	Pht=-15	Yld=130	Gpc=40	w(-5,-15,130,40)	GPC=0	0.517282	-8.13667	0.451304	0	178.133	0.914103	89.2825	76.9765	5.073	15.258	70.896
BVC	Both	Mat=-05	Pht=-15	Yld=130	Gpc=50	w(-5,-15,130,50)	GPC=0	0.517282	-8.13667	0.451304	2.45714e-16	178.133	0.938231	89.2825	76.9765	5.073	15.258	70.896
BVC	Both	Mat=-05	Pht=-15	Yld=130	Gpc=60	w(-5,-15,130,60)	GPC=0	0.517282	-8.13667	0.451304	-1.22857e-16	178.133	0.952499	89.2825	76.9765	5.073	15.258	70.896
BVC	Both	Mat=-05	Pht=-15	Yld=130	Gpc=70	w(-5,-15,130,70)	GPC=0	0.517282	-8.13667	0.451304	1.22857e-16	178.133	0.955448	89.2825	76.9765	5.073	15.258	70.896
BVC	Both	Mat=-05	Pht=-15	Yld=130	Gpc=80	w(-5,-15,130,80)	GPC=0	0.517282	-8.13667	0.451304	0	178.133	0.946763	89.2825	76.9765	5.073	15.258	70.896
BVC	Both	Mat=-05	Pht=-15	Yld=140	Gpc=01	w(-5,-15,140,1)	GPC=0	0.557678	-8.04447	0.46305	-1.19782e-16	182.706	0.765112	89.2825	76.9765	5.073	15.258	154.503
BVC	Both	Mat=-05	Pht=-15	Yld=140	Gpc=10	w(-5,-15,140,10)	GPC=0	0.557678	-8.04447	0.46305	1.19782e-16	182.706	0.800873	89.2825	76.9765	5.073	15.258	154.503
BVC	Both	Mat=-05	Pht=-15	Yld=140	Gpc=20	w(-5,-15,140,20)	GPC=0	0.557678	-8.04447	0.46305	2.39564e-16	182.706	0.83985	89.2825	76.9765	5.073	15.258	154.503
BVC	Both	Mat=-05	Pht=-15	Yld=140	Gpc=30	w(-5,-15,140,30)	GPC=0	0.557678	-8.04447	0.46305	0	182.706	0.876372	89.2825	76.9765	5.073	15.258	154.503
BVC	Both	Mat=-05	Pht=-15	Yld=140	Gpc=40	w(-5,-15,140,40)	GPC=0	0.557678	-8.04447	0.46305	2.39564e-16	182.706	0.908347	89.2825	76.9765	5.073	15.258	154.503
BVC	Both	Mat=-05	Pht=-15	Yld=140	Gpc=50	w(-5,-15,140,50)	GPC=0	0.557678	-8.04447	0.46305	0	182.706	0.933487	89.2825	76.9765	5.073	15.258	154.503
BVC	Both	Mat=-05	Pht=-15	Yld=140	Gpc=60	w(-5,-15,140,60)	GPC=0	0.557678	-8.04447	0.46305	0	182.706	0.949659	89.2825	76.9765	5.073	15.258	154.503
BVC	Both	Mat=-05	Pht=-15	Yld=140	Gpc=70	w(-5,-15,140,70)	GPC=0	0.557678	-8.04447	0.46305	1.62868e-16	182.706	0.95532	89.2825	76.9765	5.073	15.258	154.503
BVC	Both	Mat=-05	Pht=-15	Yld=140	Gpc=80	w(-5,-15,140,80)	GPC=0	0.557678	-8.04447	0.46305	-4.09691e-16	182.706	0.949897	89.2825	76.9765	5.073	15.258	154.503
BVC	Both	Mat=-05	Pht=-15	Yld=150	Gpc=01	w(-5,-15,150,1)	GPC=0	0.595742	-7.95197	0.473936	-3.14475e-16	187.391	0.761697	89.2825	76.9765	5.073	15.258	238.11
BVC	Both	Mat=-05	Pht=-15	Yld=150	Gpc=10	w(-5,-15,150,10)	GPC=0	0.595742	-7.95197	0.473936	-2.33574e-16	187.391	0.796534	89.2825	76.9765	5.073	15.258	238.11
BVC	Both	Mat=-05	Pht=-15	Yld=150	Gpc=20	w(-5,-15,150,20)	GPC=0	0.595742	-7.95197	0.473936	1.16787e-16	187.391	0.834656	89.2825	76.9765	5.073	15.258	238.11
BVC	Both	Mat=-05	Pht=-15	Yld=150	Gpc=30	w(-5,-15,150,30)	GPC=0	0.595742	-7.95197	0.473936	5.83936e-16	187.391	0.870674	89.2825	76.9765	5.073	15.258	238.11
BVC	Both	Mat=-05	Pht=-15	Yld=150	Gpc=40	w(-5,-15,150,40)	GPC=0	0.595742	-7.95197	0.473936	-1.16787e-16	187.391	0.902693	89.2825	76.9765	5.073	15.258	238.11
BVC	Both	Mat=-05	Pht=-15	Yld=150	Gpc=50	w(-5,-15,150,50)	GPC=0	0.595742	-7.95197	0.473936	0	187.391	0.928607	89.2825	76.9765	5.073	15.258	238.11
BVC	Both	Mat=-05	Pht=-15	Yld=150	Gpc=60	w(-5,-15,150,60)	GPC=0	0.595742	-7.95197	0.473936	-1.16787e-16	187.391	0.946382	89.2825	76.9765	5.073	15.258	238.11
BVC	Both	Mat=-05	Pht=-15	Yld=150	Gpc=70	w(-5,-15,150,70)	GPC=0	0.595742	-7.95197	0.473936	0	187.391	0.954439	89.2825	76.9765	5.073	15.258	238.11
BVC	Both	Mat=-05	Pht=-15	Yld=150	Gpc=80	w(-5,-15,150,80)	GPC=0	0.595742	-7.95197	0.473936	0	187.391	0.952008	89.2825	76.9765	5.073	15.258	238.11
BVC	Both	Mat=-10	Pht=-01	Yld=001	Gpc=01	w(-10,-1,1,1)	GPC=0	-3.95214	-1.23871	-0.179616	-1.34824e-16	40.5805	0.828785	84.428	83.8295	4.5535	14.674	-1005.11
BVC	Both	Mat=-10	Pht=-01	Yld=001	Gpc=10	w(-10,-1,1,10)	GPC=0	-3.95214	-1.23871	-0.179616	-4.04471e-16	40.5805	0.670613	84.428	83.8295	4.5535	14.674	-1005.11
BVC	Both	Mat=-10	Pht=-01	Yld=001	Gpc=20	w(-10,-1,1,20)	GPC=0	-3.95214	-1.23871	-0.179616	-4.04471e-16	40.5805	0.529211	84.428	83.8295	4.5535	14.674	-1005.11
BVC	Both	Mat=-10	Pht=-01	Yld=001	Gpc=30	w(-10,-1,1,30)	GPC=0	-3.95214	-1.23871	-0.179616	-2.69648e-16	40.5805	0.428842	84.428	83.8295	4.5535	14.674	-1005.11
BVC	Both	Mat=-10	Pht=-01	Yld=001	Gpc=40	w(-10,-1,1,40)	GPC=0	-3.95214	-1.23871	-0.179616	-2.69648e-16	40.5805	0.357497	84.428	83.8295	4.5535	14.674	-1005.11
BVC	Both	Mat=-10	Pht=-01	Yld=001	Gpc=50	w(-10,-1,1,50)	GPC=0	-3.95214	-1.23871	-0.179616	-1.34824e-16	40.5805	0.305262	84.428	83.8295	4.5535	14.674	-1005.11
BVC	Both	Mat=-10	Pht=-01	Yld=001	Gpc=60	w(-10,-1,1,60)	GPC=0	-3.95214	-1.23871	-0.179616	-2.69648e-16	40.5805	0.265764	84.428	83.8295	4.5535	14.674	-1005.11
BVC	Both	Mat=-10	Pht=-01	Yld=001	Gpc=70	w(-10,-1,1,70)	GPC=0	-3.95214	-1.23871	-0.179616	-2.69648e-16	40.5805	0.235018	84.428	83.8295	4.5535	14.674	-1005.11
BVC	Both	Mat=-10	Pht=-01	Yld=001	Gpc=80	w(-10,-1,1,80)	GPC=0	-3.95214	-1.23871	-0.179616	-1.34824e-16	40.5805	0.210483	84.428	83.8295	4.5535	14.674	-1005.11
BVC	Both	Mat=-10	Pht=-01	Yld=010	Gpc=01	w(-10,-1,10,1)	GPC=0	-3.85127	-1.74241	-0.0889168	-4.16951e-16	39.3659	0.860737	84.4455	83.975	4.616	14.6645	-935.334
BVC	Both	Mat=-10	Pht=-01	Yld=010	Gpc=10	w(-10,-1,10,10)	GPC=0	-3.85127	-1.74241	-0.0889168	-2.77967e-16	39.3659	0.698479	84.4455	83.975	4.616	14.6645	-935.334
BVC	Both	Mat=-10	Pht=-01	Yld=010	Gpc=20	w(-10,-1,10,20)	GPC=0	-3.85127	-1.74241	-0.0889168	-1.38984e-16	39.3659	0.546168	84.4455	83.975	4.616	14.6645	-935.334
BVC	Both	Mat=-10	Pht=-01	Yld=010	Gpc=30	w(-10,-1,10,30)	GPC=0	-3.85127	-1.74241	-0.0889168	-5.55935e-16	39.3659	0.438213	84.4455	83.975	4.616	14.6645	-935.334
BVC	Both	Mat=-10	Pht=-01	Yld=010	Gpc=40	w(-10,-1,10,40)	GPC=0	-3.85127	-1.74241	-0.0889168	-5.55935e-16	39.3659	0.362376	84.4455	83.975	4.616	14.6645	-935.334
BVC	Both	Mat=-10	Pht=-01	Yld=010	Gpc=50	w(-10,-1,10,50)	GPC=0	-3.85127	-1.74241	-0.0889168	-1.11187e-15	39.3659	0.307504	84.4455	83.975	4.616	14.6645	-935.334
BVC	Both	Mat=-10	Pht=-01	Yld=010	Gpc=60	w(-10,-1,10,60)	GPC=0	-3.85127	-1.74241	-0.0889168	-1.38984e-15	39.3659	0.266424	84.4455	83.975	4.616	14.6645	-935.334
BVC	Both	Mat=-10	Pht=-01	Yld=010	Gpc=70	w(-10,-1,10,70)	GPC=0	-3.85127	-1.74241	-0.0889168	-1.11187e-15	39.3659	0.234704	84.4455	83.975	4.616	14.6645	-935.334
BVC	Both	Mat=-10	Pht=-01	Yld=010	Gpc=80	w(-10,-1,10,80)	GPC=0	-3.85127	-1.74241	-0.0889168	-1.38984e-15	39.3659	0.209559	84.4455	83.975	4.616	14.6645	-935.334
BVC	Both	Mat=-10	Pht=-01	Yld=020	Gpc=01	w(-10,-1,20,1)	GPC=0	-3.63659	-2.28025	0.0181828	2.80505e-16	39.0098	0.895352	84.5745	84.045	4.693	14.6085	-857.256
BVC	Both	Mat=-10	Pht=-01	Yld=020	Gpc=10	w(-10,-1,20,10)	GPC=0	-3.63659	-2.28025	0.0181828	-2.80505e-16	39.0098	0.739413	84.5745	84.045	4.693	14.6085	-857.256
BVC	Both	Mat=-10	Pht=-01	Yld=020	Gpc=20	w(-10,-1,20,20)	GPC=0	-3.63659	-2.28025	0.0181828	-2.80505e-16	39.0098	0.576406	84.5745	84.045	4.693	14.6085	-857.256
BVC	Both	Mat=-10	Pht=-01	Yld=020	Gpc=30	w(-10,-1,20,30)	GPC=0	-3.63659	-2.28025	0.0181828	-7.01262e-16	39.0098	0.458672	84.5745	84.045	4.693	14.6085	-857.256
BVC	Both	Mat=-10	Pht=-01	Yld=020	Gpc=40	w(-10,-1,20,40)	GPC=0	-3.63659	-2.28025	0.0181828	-7.01262e-16	39.0098	0.376371	84.5745	84.045	4.693	14.6085	-857.256
BVC	Both	Mat=-10	Pht=-01	Yld=020	Gpc=50	w(-10,-1,20,50)	GPC=0	-3.63659	-2.28025	0.0181828	-7.01262e-16	39.0098	0.317369	84.5745	84.045	4.693	14.6085	-857.256
BVC	Both	Mat=-10	Pht=-01	Yld=020	Gpc=60	w(-10,-1,20,60)	GPC=0	-3.63659	-2.28025	0.0181828	-1.26227e-15	39.0098	0.273591	84.5745	84.045	4.693	14.6085	-857.256
BVC	Both	Mat=-10	Pht=-01	Yld=020	Gpc=70	w(-10,-1,20,70)	GPC=0	-3.63659	-2.28025	0.0181828	-8.41514e-16	39.0098	0.240051	84.5745	84.045	4.693	14.6085	-857.256
BVC	Both	Mat=-10	Pht=-01	Yld=020	Gpc=80	w(-10,-1,20,80)	GPC=0	-3.63659	-2.28025	0.0181828	-9.81767e-16	39.0098	0.213635	84.5745	84.045	4.693	14.6085	-857.256
BVC	Both	Mat=-10	Pht=-01	Yld=030	Gpc=01	w(-10,-1,30,1)	GPC=0	-3.32582	-2.75175	0.123825	0	39.7247	0.921377	84.801	83.2335	4.8115	14.843	-778.029
BVC	Both	Mat=-10	Pht=-01	Yld=030	Gpc=10	w(-10,-1,30,10)	GPC=0	-3.32582	-2.75175	0.123825	-5.50914e-16	39.7247	0.787534	84.801	83.2335	4.8115	14.843	-778.029
BVC	Both	Mat=-10	Pht=-01	Yld=030	Gpc=20	w(-10,-1,30,20)	GPC=0	-3.32582	-2.75175	0.123825	-4.13186e-16	39.7247	0.618925	84.801	83.2335	4.8115	14.843	-778.029
BVC	Both	Mat=-10	Pht=-01	Yld=030	Gpc=30	w(-10,-1,30,30)	GPC=0	-3.32582	-2.75175	0.123825	-4.13186e-16	39.7247	0.490807	84.801	83.2335	4.8115	14.843	-778.029
BVC	Both	Mat=-10	Pht=-01	Yld=030	Gpc=40	w(-10,-1,30,40)	GPC=0	-3.32582	-2.75175	0.123825	-8.26372e-16	39.7247	0.400494	84.801	83.2335	4.8115	14.843	-778.029
BVC	Both	Mat=-10	Pht=-01	Yld=030	Gpc=50	w(-10,-1,30,50)	GPC=0	-3.32582	-2.75175	0.123825	-8.26372e-16	39.7247	0.335946	84.801	83.2335	4.8115	14.843	-778.029
BVC	Both	Mat=-10	Pht=-01	Yld=030	Gpc=60	w(-10,-1,30,60)	GPC=0	-3.32582	-2.75175	0.123825	-8.26372e-16	39.7247	0.288326	84.801	83.2335	4.8115	14.843	-778.029
BVC	Both	Mat=-10	Pht=-01	Yld=030	Gpc=70	w(-10,-1,30,70)	GPC=0	-3.32582	-2.75175	0.123825	-1.37729e-15	39.7247	0.252055	84.801	83.2335	4.8115	14.843	-778.029
BVC	Both	Mat=-10	Pht=-01	Yld=030	Gpc=80	w(-10,-1,30,80)	GPC=0	-3.32582	-2.75175	0.123825	-1.23956e-15	39.7247	0.223641	84.801	83.2335	4.8115	14.843	-778.029
BVC	Both	Mat=-10	Pht=-01	Yld=040	Gpc=01	w(-10,-1,40,1)	GPC=0	-2.9519	-3.12803	0.220202	0	41.4551	0.933182	85.098	82.8785	4.897	14.8445	-697.575
BVC	Both	Mat=-10	Pht=-01	Yld=040	Gpc=10	w(-10,-1,40,10)	GPC=0	-2.9519	-3.12803	0.220202	-6.59898e-17	41.4551	0.835922	85.098	82.8785	4.897	14.8445	-697.575
BVC	Both	Mat=-10	Pht=-01	Yld=040	Gpc=20	w(-10,-1,40,20)	GPC=0	-2.9519	-3.12803	0.220202	-1.3198e-16	41.4551	0.671366	85.098	82.8785	4.897	14.8445	-697.575
BVC	Both	Mat=-10	Pht=-01	Yld=040	Gpc=30	w(-10,-1,40,30)	GPC=0	-2.9519	-3.12803	0.220202	-1.97969e-16	41.4551	0.534189	85.098	82.8785	4.897	14.8445	-697.575
BVC	Both	Mat=-10	Pht=-01	Yld=040	Gpc=40	w(-10,-1,40,40)	GPC=0	-2.9519	-3.12803	0.220202	-7.91877e-16	41.4551	0.434849	85.098	82.8785	4.897	14.8445	-697.575
BVC	Both	Mat=-10	Pht=-01	Yld=040	Gpc=50	w(-10,-1,40,50)	GPC=0	-2.9519	-3.12803	0.220202	-7.25888e-16	41.4551	0.363441	85.098	82.8785	4.897	14.8445	-697.575
BVC	Both	Mat=-10	Pht=-01	Yld=040	Gpc=60	w(-10,-1,40,60)	GPC=0	-2.9519	-3.12803	0.220202	-7.25888e-16	41.4551	0.310818	85.098	82.8785	4.897	14.8445	-697.575
BVC	Both	Mat=-10	Pht=-01	Yld=040	Gpc=70	w(-10,-1,40,70)	GPC=0	-2.9519	-3.12803	0.220202	-1.45178e-15	41.4551	0.270866	85.098	82.8785	4.897	14.8445	-697.575
BVC	Both	Mat=-10	Pht=-01	Yld=040	Gpc=80	w(-10,-1,40,80)	GPC=0	-2.9519	-3.12803	0.220202	-9.89847e-16	41.4551	0.239684	85.098	82.8785	4.897	14.8445	-697.575
BVC	Both	Mat=-10	Pht=-01	Yld=050	Gpc=01	w(-10,-1,50,1)	GPC=0	-2.55492	-3.40352	0.302578	1.24116e-16	44.0816	0.930976	85.422	82.755	4.975	14.863	-616.381
BVC	Both	Mat=-10	Pht=-01	Yld=050	Gpc=10	w(-10,-1,50,10)	GPC=0	-2.55492	-3.40352	0.302578	-1.3963e-16	44.0816	0.876674	85.422	82.755	4.975	14.863	-616.381
BVC	Both	Mat=-10	Pht=-01	Yld=050	Gpc=20	w(-10,-1,50,20)	GPC=0	-2.55492	-3.40352	0.302578	-1.3963e-16	44.0816	0.728651	85.422	82.755	4.975	14.863	-616.381
BVC	Both	Mat=-10	Pht=-01	Yld=050	Gpc=30	w(-10,-1,50,30)	GPC=0	-2.55492	-3.40352	0.302578	-1.55145e-16	44.0816	0.586567	85.422	82.755	4.975	14.863	-616.381
BVC	Both	Mat=-10	Pht=-01	Yld=050	Gpc=40	w(-10,-1,50,40)	GPC=0	-2.55492	-3.40352	0.302578	-2.7926e-16	44.0816	0.47836	85.422	82.755	4.975	14.863	-616.381
BVC	Both	Mat=-10	Pht=-01	Yld=050	Gpc=50	w(-10,-1,50,50)	GPC=0	-2.55492	-3.40352	0.302578	-6.82637e-16	44.0816	0.399223	85.422	82.755	4.975	14.863	-616.381
BVC	Both	Mat=-10	Pht=-01	Yld=050	Gpc=60	w(-10,-1,50,60)	GPC=0	-2.55492	-3.40352	0.302578	1.70659e-16	44.0816	0.340616	85.422	82.755	4.975	14.863	-616.381
BVC	Both	Mat=-10	Pht=-01	Yld=050	Gpc=70	w(-10,-1,50,70)	GPC=0	-2.55492	-3.40352	0.302578	1.24116e-16	44.0816	0.296112	85.422	82.755	4.975	14.863	-616.381
BVC	Both	Mat=-10	Pht=-01	Yld=050	Gpc=80	w(-10,-1,50,80)	GPC=0	-2.55492	-3.40352	0.302578	-1.02395e-15	44.0816	0.261435	85.422	82.755	4.975	14.863	-616.381
BVC	Both	Mat=-10	Pht=-01	Yld=060	Gpc=01	w(-10,-1,60,1)	GPC=0	-2.1679	-3.59057	0.36977	5.76455e-17	47.4558	0.919334	86.2545	82.3125	5.1315	14.7645	-534.362
BVC	Both	Mat=-10	Pht=-01	Yld=060	Gpc=10	w(-10,-1,60,10)	GPC=0	-2.1679	-3.59057	0.36977	-2.30582e-16	47.4558	0.904723	86.2545	82.3125	5.1315	14.7645	-534.362
BVC	Both	Mat=-10	Pht=-01	Yld=060	Gpc=20	w(-10,-1,60,20)	GPC=0	-2.1679	-3.59057	0.36977	-2.30582e-16	47.4558	0.784291	86.2545	82.3125	5.1315	14.7645	-534.362
BVC	Both	Mat=-10	Pht=-01	Yld=060	Gpc=30	w(-10,-1,60,30)	GPC=0	-2.1679	-3.59057	0.36977	-5.1881e-16	47.4558	0.644166	86.2545	82.3125	5.1315	14.7645	-534.362
BVC	Both	Mat=-10	Pht=-01	Yld=060	Gpc=40	w(-10,-1,60,40)	GPC=0	-2.1679	-3.59057	0.36977	-1.15291e-16	47.4558	0.528934	86.2545	82.3125	5.1315	14.7645	-534.362
BVC	Both	Mat=-10	Pht=-01	Yld=060	Gpc=50	w(-10,-1,60,50)	GPC=0	-2.1679	-3.59057	0.36977	2.30582e-16	47.4558	0.441986	86.2545	82.3125	5.1315	14.7645	-534.362
BVC	Both	Mat=-10	Pht=-01	Yld=060	Gpc=60	w(-10,-1,60,60)	GPC=0	-2.1679	-3.59057	0.36977	-1.15291e-16	47.4558	0.376787	86.2545	82.3125	5.1315	14.7645	-534.362
BVC	Both	Mat=-10	Pht=-01	Yld=060	Gpc=70	w(-10,-1,60,70)	GPC=0	-2.1679	-3.59057	0.36977	-7.63803e-16	47.4558	0.327055	86.2545	82.3125	5.1315	14.7645	-534.362
BVC	Both	Mat=-10	Pht=-01	Yld=060	Gpc=80	w(-10,-1,60,80)	GPC=0	-2.1679	-3.59057	0.36977	-1.03041e-15	47.4558	0.288266	86.2545	82.3125	5.1315	14.7645	-534.362
BVC	Both	Mat=-10	Pht=-01	Yld=070	Gpc=01	w(-10,-1,70,1)	GPC=0	-1.81086	-3.70895	0.423043	-1.06381e-16	51.4305	0.903379	87.1225	82.421	5.272	14.775	-451.214
BVC	Both	Mat=-10	Pht=-01	Yld=070	Gpc=10	w(-10,-1,70,10)	GPC=0	-1.81086	-3.70895	0.423043	1.06381e-16	51.4305	0.919524	87.1225	82.421	5.272	14.775	-451.214
BVC	Both	Mat=-10	Pht=-01	Yld=070	Gpc=20	w(-10,-1,70,20)	GPC=0	-1.81086	-3.70895	0.423043	3.19143e-16	51.4305	0.832516	87.1225	82.421	5.272	14.775	-451.214
BVC	Both	Mat=-10	Pht=-01	Yld=070	Gpc=30	w(-10,-1,70,30)	GPC=0	-1.81086	-3.70895	0.423043	-4.25523e-16	51.4305	0.702438	87.1225	82.421	5.272	14.775	-451.214
BVC	Both	Mat=-10	Pht=-01	Yld=070	Gpc=40	w(-10,-1,70,40)	GPC=0	-1.81086	-3.70895	0.423043	-2.12762e-16	51.4305	0.583785	87.1225	82.421	5.272	14.775	-451.214
BVC	Both	Mat=-10	Pht=-01	Yld=070	Gpc=50	w(-10,-1,70,50)	GPC=0	-1.81086	-3.70895	0.423043	-4.25523e-16	51.4305	0.489967	87.1225	82.421	5.272	14.775	-451.214
BVC	Both	Mat=-10	Pht=-01	Yld=070	Gpc=60	w(-10,-1,70,60)	GPC=0	-1.81086	-3.70895	0.423043	-6.38285e-16	51.4305	0.418104	87.1225	82.421	5.272	14.775	-451.214
BVC	Both	Mat=-10	Pht=-01	Yld=070	Gpc=70	w(-10,-1,70,70)	GPC=0	-1.81086	-3.70895	0.423043	-6.38285e-16	51.4305	0.362758	87.1225	82.421	5.272	14.775	-451.214
BVC	Both	Mat=-10	Pht=-01	Yld=070	Gpc=80	w(-10,-1,70,80)	GPC=0	-1.81086	-3.70895	0.423043	2.12762e-16	51.4305	0.319413	87.1225	82.421	5.272	14.775	-451.214
BVC	Both	Mat=-10	Pht=-01	Yld=080	Gpc=01	w(-10,-1,80,1)	GPC=0	-1.49231	-3.77812	0.464708	9.79139e-17	55.8779	0.886643	87.585	82.388	5.355	14.6065	-367.203
BVC	Both	Mat=-10	Pht=-01	Yld=080	Gpc=10	w(-10,-1,80,10)	GPC=0	-1.49231	-3.77812	0.464708	9.79139e-17	55.8779	0.923716	87.585	82.388	5.355	14.6065	-367.203
BVC	Both	Mat=-10	Pht=-01	Yld=080	Gpc=20	w(-10,-1,80,20)	GPC=0	-1.49231	-3.77812	0.464708	2.93742e-16	55.8779	0.869948	87.585	82.388	5.355	14.6065	-367.203
BVC	Both	Mat=-10	Pht=-01	Yld=080	Gpc=30	w(-10,-1,80,30)	GPC=0	-1.49231	-3.77812	0.464708	4.89569e-16	55.8779	0.757029	87.585	82.388	5.355	14.6065	-367.203
BVC	Both	Mat=-10	Pht=-01	Yld=080	Gpc=40	w(-10,-1,80,40)	GPC=0	-1.49231	-3.77812	0.464708	0	55.8779	0.639827	87.585	82.388	5.355	14.6065	-367.203
BVC	Both	Mat=-10	Pht=-01	Yld=080	Gpc=50	w(-10,-1,80,50)	GPC=0	-1.49231	-3.77812	0.464708	-5.38526e-16	55.8779	0.541152	87.585	82.388	5.355	14.6065	-367.203
BVC	Both	Mat=-10	Pht=-01	Yld=080	Gpc=60	w(-10,-1,80,60)	GPC=0	-1.49231	-3.77812	0.464708	1.95828e-16	55.8779	0.463189	87.585	82.388	5.355	14.6065	-367.203
BVC	Both	Mat=-10	Pht=-01	Yld=080	Gpc=70	w(-10,-1,80,70)	GPC=0	-1.49231	-3.77812	0.464708	-2.44785e-16	55.8779	0.402208	87.585	82.388	5.355	14.6065	-367.203
BVC	Both	Mat=-10	Pht=-01	Yld=080	Gpc=80	w(-10,-1,80,80)	GPC=0	-1.49231	-3.77812	0.464708	1.95828e-16	55.8779	0.354078	87.585	82.388	5.355	14.6065	-367.203
BVC	Both	Mat=-10	Pht=-01	Yld=090	Gpc=01	w(-10,-1,90,1)	GPC=0	-1.21332	-3.81378	0.49719	9.01442e-17	60.6941	0.870948	88.004	82.6625	5.393	14.727	-282.734
BVC	Both	Mat=-10	Pht=-01	Yld=090	Gpc=10	w(-10,-1,90,10)	GPC=0	-1.21332	-3.81378	0.49719	9.01442e-17	60.6941	0.920841	88.004	82.6625	5.393	14.727	-282.734
BVC	Both	Mat=-10	Pht=-01	Yld=090	Gpc=20	w(-10,-1,90,20)	GPC=0	-1.21332	-3.81378	0.49719	0	60.6941	0.895968	88.004	82.6625	5.393	14.727	-282.734
BVC	Both	Mat=-10	Pht=-01	Yld=090	Gpc=30	w(-10,-1,90,30)	GPC=0	-1.21332	-3.81378	0.49719	-2.70433e-16	60.6941	0.804641	88.004	82.6625	5.393	14.727	-282.734
BVC	Both	Mat=-10	Pht=-01	Yld=090	Gpc=40	w(-10,-1,90,40)	GPC=0	-1.21332	-3.81378	0.49719	3.60577e-16	60.6941	0.694078	88.004	82.6625	5.393	14.727	-282.734
BVC	Both	Mat=-10	Pht=-01	Yld=090	Gpc=50	w(-10,-1,90,50)	GPC=0	-1.21332	-3.81378	0.49719	0	60.6941	0.593444	88.004	82.6625	5.393	14.727	-282.734
BVC	Both	Mat=-10	Pht=-01	Yld=090	Gpc=60	w(-10,-1,90,60)	GPC=0	-1.21332	-3.81378	0.49719	1.80288e-16	60.6941	0.510601	88.004	82.6625	5.393	14.727	-282.734
BVC	Both	Mat=-10	Pht=-01	Yld=090	Gpc=70	w(-10,-1,90,70)	GPC=0	-1.21332	-3.81378	0.49719	0	60.6941	0.44437	88.004	82.6625	5.393	14.727	-282.734
BVC	Both	Mat=-10	Pht=-01	Yld=090	Gpc=80	w(-10,-1,90,80)	GPC=0	-1.21332	-3.81378	0.49719	-5.40865e-16	60.6941	0.391474	88.004	82.6625	5.393	14.727	-282.734
BVC	Both	Mat=-10	Pht=-01	Yld=100	Gpc=01	w(-10,-1,100,1)	GPC=0	-0.971084	-3.82737	0.5226	8.31516e-17	65.7982	0.856988	88.1575	82.602	5.4145	14.686	-197.866
BVC	Both	Mat=-10	Pht=-01	Yld=100	Gpc=10	w(-10,-1,100,10)	GPC=0	-0.971084	-3.82737	0.5226	1.66303e-16	65.7982	0.913922	88.1575	82.602	5.4145	14.686	-197.866
BVC	Both	Mat=-10	Pht=-01	Yld=100	Gpc=20	w(-10,-1,100,20)	GPC=0	-0.971084	-3.82737	0.5226	4.9891e-16	65.7982	0.911919	88.1575	82.602	5.4145	14.686	-197.866
BVC	Both	Mat=-10	Pht=-01	Yld=100	Gpc=30	w(-10,-1,100,30)	GPC=0	-0.971084	-3.82737	0.5226	6.65213e-16	65.7982	0.843485	88.1575	82.602	5.4145	14.686	-197.866
BVC	Both	Mat=-10	Pht=-01	Yld=100	Gpc=40	w(-10,-1,100,40)	GPC=0	-0.971084	-3.82737	0.5226	-8.31516e-17	65.7982	0.744043	88.1575	82.602	5.4145	14.686	-197.866
BVC	Both	Mat=-10	Pht=-01	Yld=100	Gpc=50	w(-10,-1,100,50)	GPC=0	-0.971084	-3.82737	0.5226	0	65.7982	0.644833	88.1575	82.602	5.4145	14.686	-197.866
BVC	Both	Mat=-10	Pht=-01	Yld=100	Gpc=60	w(-10,-1,100,60)	GPC=0	-0.971084	-3.82737	0.5226	-3.32606e-16	65.7982	0.558902	88.1575	82.602	5.4145	14.686	-197.866
BVC	Both	Mat=-10	Pht=-01	Yld=100	Gpc=70	w(-10,-1,100,70)	GPC=0	-0.971084	-3.82737	0.5226	-3.32606e-16	65.7982	0.488214	88.1575	82.602	5.4145	14.686	-197.866
BVC	Both	Mat=-10	Pht=-01	Yld=100	Gpc=80	w(-10,-1,100,80)	GPC=0	-0.971084	-3.82737	0.5226	-4.9891e-16	65.7982	0.430836	88.1575	82.602	5.4145	14.686	-197.866
BVC	Both	Mat=-10	Pht=-01	Yld=110	Gpc=01	w(-10,-1,110,1)	GPC=0	-0.761296	-3.82682	0.542622	1.53841e-16	71.1282	0.84488	88.274	82.237	5.408	14.7655	-112.797
BVC	Both	Mat=-10	Pht=-01	Yld=110	Gpc=10	w(-10,-1,110,10)	GPC=0	-0.761296	-3.82682	0.542622	1.53841e-16	71.1282	0.905057	88.274	82.237	5.408	14.7655	-112.797
BVC	Both	Mat=-10	Pht=-01	Yld=110	Gpc=20	w(-10,-1,110,20)	GPC=0	-0.761296	-3.82682	0.542622	3.07682e-16	71.1282	0.919997	88.274	82.237	5.408	14.7655	-112.797
BVC	Both	Mat=-10	Pht=-01	Yld=110	Gpc=30	w(-10,-1,110,30)	GPC=0	-0.761296	-3.82682	0.542622	-4.61524e-16	71.1282	0.873238	88.274	82.237	5.408	14.7655	-112.797
BVC	Both	Mat=-10	Pht=-01	Yld=110	Gpc=40	w(-10,-1,110,40)	GPC=0	-0.761296	-3.82682	0.542622	0	71.1282	0.787973	88.274	82.237	5.408	14.7655	-112.797
BVC	Both	Mat=-10	Pht=-01	Yld=110	Gpc=50	w(-10,-1,110,50)	GPC=0	-0.761296	-3.82682	0.542622	4.61524e-16	71.1282	0.693548	88.274	82.237	5.408	14.7655	-112.797
BVC	Both	Mat=-10	Pht=-01	Yld=110	Gpc=60	w(-10,-1,110,60)	GPC=0	-0.761296	-3.82682	0.542622	0	71.1282	0.606716	88.274	82.237	5.408	14.7655	-112.797
BVC	Both	Mat=-10	Pht=-01	Yld=110	Gpc=70	w(-10,-1,110,70)	GPC=0	-0.761296	-3.82682	0.542622	-4.61524e-16	71.1282	0.532736	88.274	82.237	5.408	14.7655	-112.797
BVC	Both	Mat=-10	Pht=-01	Yld=110	Gpc=80	w(-10,-1,110,80)	GPC=0	-0.761296	-3.82682	0.542622	0	71.1282	0.471423	88.274	82.237	5.408	14.7655	-112.797
BVC	Both	Mat=-10	Pht=-01	Yld=120	Gpc=01	w(-10,-1,120,1)	GPC=0	-0.579403	-3.81741	0.558546	1.42783e-16	76.637	0.834486	88.274	82.237	5.408	14.7655	-27.7117
BVC	Both	Mat=-10	Pht=-01	Yld=120	Gpc=10	w(-10,-1,120,10)	GPC=0	-0.579403	-3.81741	0.558546	1.42783e-16	76.637	0.895537	88.274	82.237	5.408	14.7655	-27.7117
BVC	Both	Mat=-10	Pht=-01	Yld=120	Gpc=20	w(-10,-1,120,20)	GPC=0	-0.579403	-3.81741	0.558546	2.85566e-16	76.637	0.922426	88.274	82.237	5.408	14.7655	-27.7117
BVC	Both	Mat=-10	Pht=-01	Yld=120	Gpc=30	w(-10,-1,120,30)	GPC=0	-0.579403	-3.81741	0.558546	2.85566e-16	76.637	0.894635	88.274	82.237	5.408	14.7655	-27.7117
BVC	Both	Mat=-10	Pht=-01	Yld=120	Gpc=40	w(-10,-1,120,40)	GPC=0	-0.579403	-3.81741	0.558546	-1.42783e-16	76.637	0.824966	88.274	82.237	5.408	14.7655	-27.7117
BVC	Both	Mat=-10	Pht=-01	Yld=120	Gpc=50	w(-10,-1,120,50)	GPC=0	-0.579403	-3.81741	0.558546	-2.85566e-16	76.637	0.738196	88.274	82.237	5.408	14.7655	-27.7117
BVC	Both	Mat=-10	Pht=-01	Yld=120	Gpc=60	w(-10,-1,120,60)	GPC=0	-0.579403	-3.81741	0.558546	-1.42783e-16	76.637	0.6528	88.274	82.237	5.408	14.7655	-27.7117
BVC	Both	Mat=-10	Pht=-01	Yld=120	Gpc=70	w(-10,-1,120,70)	GPC=0	-0.579403	-3.81741	0.558546	-5.71131e-16	76.637	0.576974	88.274	82.237	5.408	14.7655	-27.7117
BVC	Both	Mat=-10	Pht=-01	Yld=120	Gpc=80	w(-10,-1,120,80)	GPC=0	-0.579403	-3.81741	0.558546	1.42783e-16	76.637	0.512517	88.274	82.237	5.408	14.7655	-27.7117
BVC	Both	Mat=-10	Pht=-01	Yld=130	Gpc=01	w(-10,-1,130,1)	GPC=0	-0.421173	-3.80265	0.571341	2.65953e-16	82.2887	0.825588	88.274	82.237	5.408	14.7655	57.3733
BVC	Both	Mat=-10	Pht=-01	Yld=130	Gpc=10	w(-10,-1,130,10)	GPC=0	-0.421173	-3.80265	0.571341	2.65953e-16	82.2887	0.886089	88.274	82.237	5.408	14.7655	57.3733
BVC	Both	Mat=-10	Pht=-01	Yld=130	Gpc=20	w(-10,-1,130,20)	GPC=0	-0.421173	-3.80265	0.571341	0	82.2887	0.921061	88.274	82.237	5.408	14.7655	57.3733
BVC	Both	Mat=-10	Pht=-01	Yld=130	Gpc=30	w(-10,-1,130,30)	GPC=0	-0.421173	-3.80265	0.571341	2.65953e-16	82.2887	0.90897	88.274	82.237	5.408	14.7655	57.3733
BVC	Both	Mat=-10	Pht=-01	Yld=130	Gpc=40	w(-10,-1,130,40)	GPC=0	-0.421173	-3.80265	0.571341	2.65953e-16	82.2887	0.854876	88.274	82.237	5.408	14.7655	57.3733
BVC	Both	Mat=-10	Pht=-01	Yld=130	Gpc=50	w(-10,-1,130,50)	GPC=0	-0.421173	-3.80265	0.571341	0	82.2887	0.777838	88.274	82.237	5.408	14.7655	57.3733
BVC	Both	Mat=-10	Pht=-01	Yld=130	Gpc=60	w(-10,-1,130,60)	GPC=0	-0.421173	-3.80265	0.571341	0	82.2887	0.696105	88.274	82.237	5.408	14.7655	57.3733
BVC	Both	Mat=-10	Pht=-01	Yld=130	Gpc=70	w(-10,-1,130,70)	GPC=0	-0.421173	-3.80265	0.571341	-3.98929e-16	82.2887	0.620044	88.274	82.237	5.408	14.7655	57.3733
BVC	Both	Mat=-10	Pht=-01	Yld=130	Gpc=80	w(-10,-1,130,80)	GPC=0	-0.421173	-3.80265	0.571341	-6.64881e-16	82.2887	0.553433	88.274	82.237	5.408	14.7655	57.3733
BVC	Both	Mat=-10	Pht=-01	Yld=140	Gpc=01	w(-10,-1,140,1)	GPC=0	-0.28291	-3.78482	0.581728	3.72802e-16	88.0558	0.817956	88.617	81.8105	5.4285	14.765	142.634
BVC	Both	Mat=-10	Pht=-01	Yld=140	Gpc=10	w(-10,-1,140,10)	GPC=0	-0.28291	-3.78482	0.581728	0	88.0558	0.877085	88.617	81.8105	5.4285	14.765	142.634
BVC	Both	Mat=-10	Pht=-01	Yld=140	Gpc=20	w(-10,-1,140,20)	GPC=0	-0.28291	-3.78482	0.581728	4.97069e-16	88.0558	0.917293	88.617	81.8105	5.4285	14.765	142.634
BVC	Both	Mat=-10	Pht=-01	Yld=140	Gpc=30	w(-10,-1,140,30)	GPC=0	-0.28291	-3.78482	0.581728	2.48534e-16	88.0558	0.917692	88.617	81.8105	5.4285	14.765	142.634
BVC	Both	Mat=-10	Pht=-01	Yld=140	Gpc=40	w(-10,-1,140,40)	GPC=0	-0.28291	-3.78482	0.581728	2.48534e-16	88.0558	0.878132	88.617	81.8105	5.4285	14.765	142.634
BVC	Both	Mat=-10	Pht=-01	Yld=140	Gpc=50	w(-10,-1,140,50)	GPC=0	-0.28291	-3.78482	0.581728	-1.24267e-16	88.0558	0.812003	88.617	81.8105	5.4285	14.765	142.634
BVC	Both	Mat=-10	Pht=-01	Yld=140	Gpc=60	w(-10,-1,140,60)	GPC=0	-0.28291	-3.78482	0.581728	-3.72802e-16	88.0558	0.735831	88.617	81.8105	5.4285	14.765	142.634
BVC	Both	Mat=-10	Pht=-01	Yld=140	Gpc=70	w(-10,-1,140,70)	GPC=0	-0.28291	-3.78482	0.581728	-1.24267e-16	88.0558	0.661168	88.617	81.8105	5.4285	14.765	142.634
BVC	Both	Mat=-10	Pht=-01	Yld=140	Gpc=80	w(-10,-1,140,80)	GPC=0	-0.28291	-3.78482	0.581728	-1.24267e-16	88.0558	0.593527	88.617	81.8105	5.4285	14.765	142.634
BVC	Both	Mat=-10	Pht=-01	Yld=150	Gpc=01	w(-10,-1,150,1)	GPC=0	-0.161482	-3.7654	0.590246	2.33024e-16	93.9171	0.811385	88.9175	81.7	5.4385	14.8075	227.981
BVC	Both	Mat=-10	Pht=-01	Yld=150	Gpc=10	w(-10,-1,150,10)	GPC=0	-0.161482	-3.7654	0.590246	0	93.9171	0.868696	88.9175	81.7	5.4385	14.8075	227.981
BVC	Both	Mat=-10	Pht=-01	Yld=150	Gpc=20	w(-10,-1,150,20)	GPC=0	-0.161482	-3.7654	0.590246	1.16512e-16	93.9171	0.912102	88.9175	81.7	5.4385	14.8075	227.981
BVC	Both	Mat=-10	Pht=-01	Yld=150	Gpc=30	w(-10,-1,150,30)	GPC=0	-0.161482	-3.7654	0.590246	0	93.9171	0.922149	88.9175	81.7	5.4385	14.8075	227.981
BVC	Both	Mat=-10	Pht=-01	Yld=150	Gpc=40	w(-10,-1,150,40)	GPC=0	-0.161482	-3.7654	0.590246	0	93.9171	0.895503	88.9175	81.7	5.4385	14.8075	227.981
BVC	Both	Mat=-10	Pht=-01	Yld=150	Gpc=50	w(-10,-1,150,50)	GPC=0	-0.161482	-3.7654	0.590246	0	93.9171	0.840633	88.9175	81.7	5.4385	14.8075	227.981
BVC	Both	Mat=-10	Pht=-01	Yld=150	Gpc=60	w(-10,-1,150,60)	GPC=0	-0.161482	-3.7654	0.590246	-2.33024e-16	93.9171	0.771453	88.9175	81.7	5.4385	14.8075	227.981
BVC	Both	Mat=-10	Pht=-01	Yld=150	Gpc=70	w(-10,-1,150,70)	GPC=0	-0.161482	-3.7654	0.590246	2.33024e-16	93.9171	0.699706	88.9175	81.7	5.4385	14.8075	227.981
BVC	Both	Mat=-10	Pht=-01	Yld=150	Gpc=80	w(-10,-1,150,80)	GPC=0	-0.161482	-3.7654	0.590246	2.33024e-16	93.9171	0.632221	88.9175	81.7	5.4385	14.8075	227.981
BVC	Both	Mat=-10	Pht=-05	Yld=001	Gpc=01	w(-10,-5,1,1)	GPC=0	-2.55891	-6.41974	0.0148204	0	57.7026	0.961526	86.281	78.248	4.793	14.59	-1161.39
BVC	Both	Mat=-10	Pht=-05	Yld=001	Gpc=10	w(-10,-5,1,10)	GPC=0	-2.55891	-6.41974	0.0148204	-1.89635e-16	57.7026	0.909245	86.281	78.248	4.793	14.59	-1161.39
BVC	Both	Mat=-10	Pht=-05	Yld=001	Gpc=20	w(-10,-5,1,20)	GPC=0	-2.55891	-6.41974	0.0148204	-2.87416e-16	57.7026	0.791541	86.281	78.248	4.793	14.59	-1161.39
BVC	Both	Mat=-10	Pht=-05	Yld=001	Gpc=30	w(-10,-5,1,30)	GPC=0	-2.55891	-6.41974	0.0148204	-1.33337e-16	57.7026	0.668195	86.281	78.248	4.793	14.59	-1161.39
BVC	Both	Mat=-10	Pht=-05	Yld=001	Gpc=40	w(-10,-5,1,40)	GPC=0	-2.55891	-6.41974	0.0148204	-3.7927e-16	57.7026	0.564285	86.281	78.248	4.793	14.59	-1161.39
BVC	Both	Mat=-10	Pht=-05	Yld=001	Gpc=50	w(-10,-5,1,50)	GPC=0	-2.55891	-6.41974	0.0148204	-2.57785e-16	57.7026	0.482327	86.281	78.248	4.793	14.59	-1161.39
BVC	Both	Mat=-10	Pht=-05	Yld=001	Gpc=60	w(-10,-5,1,60)	GPC=0	-2.55891	-6.41974	0.0148204	-3.9853e-16	57.7026	0.418354	86.281	78.248	4.793	14.59	-1161.39
BVC	Both	Mat=-10	Pht=-05	Yld=001	Gpc=70	w(-10,-5,1,70)	GPC=0	-2.55891	-6.41974	0.0148204	-7.5854e-16	57.7026	0.367957	86.281	78.248	4.793	14.59	-1161.39
BVC	Both	Mat=-10	Pht=-05	Yld=001	Gpc=80	w(-10,-5,1,80)	GPC=0	-2.55891	-6.41974	0.0148204	4.74088e-17	57.7026	0.327642	86.281	78.248	4.793	14.59	-1161.39
BVC	Both	Mat=-10	Pht=-05	Yld=010	Gpc=01	w(-10,-5,10,1)	GPC=0	-2.38921	-6.68779	0.0798869	-1.88241e-16	58.1299	0.960075	86.3295	78.2025	4.828	14.78	-1089.51
BVC	Both	Mat=-10	Pht=-05	Yld=010	Gpc=10	w(-10,-5,10,10)	GPC=0	-2.38921	-6.68779	0.0798869	1.88241e-16	58.1299	0.929347	86.3295	78.2025	4.828	14.78	-1089.51
BVC	Both	Mat=-10	Pht=-05	Yld=010	Gpc=20	w(-10,-5,10,20)	GPC=0	-2.38921	-6.68779	0.0798869	-2.35302e-16	58.1299	0.82211	86.3295	78.2025	4.828	14.78	-1089.51
BVC	Both	Mat=-10	Pht=-05	Yld=010	Gpc=30	w(-10,-5,10,30)	GPC=0	-2.38921	-6.68779	0.0798869	-2.82362e-16	58.1299	0.697624	86.3295	78.2025	4.828	14.78	-1089.51
BVC	Both	Mat=-10	Pht=-05	Yld=010	Gpc=40	w(-10,-5,10,40)	GPC=0	-2.38921	-6.68779	0.0798869	-9.41206e-17	58.1299	0.588919	86.3295	78.2025	4.828	14.78	-1089.51
BVC	Both	Mat=-10	Pht=-05	Yld=010	Gpc=50	w(-10,-5,10,50)	GPC=0	-2.38921	-6.68779	0.0798869	9.41206e-17	58.1299	0.502187	86.3295	78.2025	4.828	14.78	-1089.51
BVC	Both	Mat=-10	Pht=-05	Yld=010	Gpc=60	w(-10,-5,10,60)	GPC=0	-2.38921	-6.68779	0.0798869	-4.70603e-16	58.1299	0.434348	86.3295	78.2025	4.828	14.78	-1089.51
BVC	Both	Mat=-10	Pht=-05	Yld=010	Gpc=70	w(-10,-5,10,70)	GPC=0	-2.38921	-6.68779	0.0798869	2.35302e-17	58.1299	0.380988	86.3295	78.2025	4.828	14.78	-1089.51
BVC	Both	Mat=-10	Pht=-05	Yld=010	Gpc=80	w(-10,-5,10,80)	GPC=0	-2.38921	-6.68779	0.0798869	-7.52965e-16	58.1299	0.338421	86.3295	78.2025	4.828	14.78	-1089.51
BVC	Both	Mat=-10	Pht=-05	Yld=020	Gpc=01	w(-10,-5,20,1)	GPC=0	-2.17847	-6.90155	0.14935	5.53772e-16	59.2795	0.95118	86.38	78.2755	4.8835	14.8415	-1008.98
BVC	Both	Mat=-10	Pht=-05	Yld=020	Gpc=10	w(-10,-5,20,10)	GPC=0	-2.17847	-6.90155	0.14935	9.22954e-17	59.2795	0.945495	86.38	78.2755	4.8835	14.8415	-1008.98
BVC	Both	Mat=-10	Pht=-05	Yld=020	Gpc=20	w(-10,-5,20,20)	GPC=0	-2.17847	-6.90155	0.14935	0	59.2795	0.85595	86.38	78.2755	4.8835	14.8415	-1008.98
BVC	Both	Mat=-10	Pht=-05	Yld=020	Gpc=30	w(-10,-5,20,30)	GPC=0	-2.17847	-6.90155	0.14935	0	59.2795	0.73425	86.38	78.2755	4.8835	14.8415	-1008.98
BVC	Both	Mat=-10	Pht=-05	Yld=020	Gpc=40	w(-10,-5,20,40)	GPC=0	-2.17847	-6.90155	0.14935	-1.84591e-16	59.2795	0.621552	86.38	78.2755	4.8835	14.8415	-1008.98
BVC	Both	Mat=-10	Pht=-05	Yld=020	Gpc=50	w(-10,-5,20,50)	GPC=0	-2.17847	-6.90155	0.14935	4.61477e-17	59.2795	0.52957	86.38	78.2755	4.8835	14.8415	-1008.98
BVC	Both	Mat=-10	Pht=-05	Yld=020	Gpc=60	w(-10,-5,20,60)	GPC=0	-2.17847	-6.90155	0.14935	-1.84591e-16	59.2795	0.457069	86.38	78.2755	4.8835	14.8415	-1008.98
BVC	Both	Mat=-10	Pht=-05	Yld=020	Gpc=70	w(-10,-5,20,70)	GPC=0	-2.17847	-6.90155	0.14935	-9.22954e-17	59.2795	0.399958	86.38	78.2755	4.8835	14.8415	-1008.98
BVC	Both	Mat=-10	Pht=-05	Yld=020	Gpc=80	w(-10,-5,20,80)	GPC=0	-2.17847	-6.90155	0.14935	-2.76886e-16	59.2795	0.35445	86.38	78.2755	4.8835	14.8415	-1008.98
BVC	Both	Mat=-10	Pht=-05	Yld=030	Gpc=01	w(-10,-5,30,1)	GPC=0	-1.95405	-7.02913	0.213797	-1.7909e-16	61.1001	0.936561	86.38	78.2755	4.8835	14.8415	-928.201
BVC	Both	Mat=-10	Pht=-05	Yld=030	Gpc=10	w(-10,-5,30,10)	GPC=0	-1.95405	-7.02913	0.213797	1.7909e-16	61.1001	0.953832	86.38	78.2755	4.8835	14.8415	-928.201
BVC	Both	Mat=-10	Pht=-05	Yld=030	Gpc=20	w(-10,-5,30,20)	GPC=0	-1.95405	-7.02913	0.213797	8.95452e-17	61.1001	0.886805	86.38	78.2755	4.8835	14.8415	-928.201
BVC	Both	Mat=-10	Pht=-05	Yld=030	Gpc=30	w(-10,-5,30,30)	GPC=0	-1.95405	-7.02913	0.213797	-1.7909e-16	61.1001	0.773044	86.38	78.2755	4.8835	14.8415	-928.201
BVC	Both	Mat=-10	Pht=-05	Yld=030	Gpc=40	w(-10,-5,30,40)	GPC=0	-1.95405	-7.02913	0.213797	-2.68636e-16	61.1001	0.658734	86.38	78.2755	4.8835	14.8415	-928.201
BVC	Both	Mat=-10	Pht=-05	Yld=030	Gpc=50	w(-10,-5,30,50)	GPC=0	-1.95405	-7.02913	0.213797	-3.58181e-16	61.1001	0.562097	86.38	78.2755	4.8835	14.8415	-928.201
BVC	Both	Mat=-10	Pht=-05	Yld=030	Gpc=60	w(-10,-5,30,60)	GPC=0	-1.95405	-7.02913	0.213797	-4.47726e-16	61.1001	0.484792	86.38	78.2755	4.8835	14.8415	-928.201
BVC	Both	Mat=-10	Pht=-05	Yld=030	Gpc=70	w(-10,-5,30,70)	GPC=0	-1.95405	-7.02913	0.213797	-3.58181e-16	61.1001	0.423557	86.38	78.2755	4.8835	14.8415	-928.201
BVC	Both	Mat=-10	Pht=-05	Yld=030	Gpc=80	w(-10,-5,30,80)	GPC=0	-1.95405	-7.02913	0.213797	-5.37271e-16	61.1001	0.374695	86.38	78.2755	4.8835	14.8415	-928.201
BVC	Both	Mat=-10	Pht=-05	Yld=040	Gpc=01	w(-10,-5,40,1)	GPC=0	-1.7258	-7.08031	0.271864	-2.58344e-16	63.5341	0.918743	86.627	78.489	4.9685	14.9085	-847.216
BVC	Both	Mat=-10	Pht=-05	Yld=040	Gpc=10	w(-10,-5,40,10)	GPC=0	-1.7258	-7.08031	0.271864	8.61148e-17	63.5341	0.95458	86.627	78.489	4.9685	14.9085	-847.216
BVC	Both	Mat=-10	Pht=-05	Yld=040	Gpc=20	w(-10,-5,40,20)	GPC=0	-1.7258	-7.08031	0.271864	-1.7223e-16	63.5341	0.912126	86.627	78.489	4.9685	14.9085	-847.216
BVC	Both	Mat=-10	Pht=-05	Yld=040	Gpc=30	w(-10,-5,40,30)	GPC=0	-1.7258	-7.08031	0.271864	-3.44459e-16	63.5341	0.811476	86.627	78.489	4.9685	14.9085	-847.216
BVC	Both	Mat=-10	Pht=-05	Yld=040	Gpc=40	w(-10,-5,40,40)	GPC=0	-1.7258	-7.08031	0.271864	0	63.5341	0.698874	86.627	78.489	4.9685	14.9085	-847.216
BVC	Both	Mat=-10	Pht=-05	Yld=040	Gpc=50	w(-10,-5,40,50)	GPC=0	-1.7258	-7.08031	0.271864	-3.44459e-16	63.5341	0.598867	86.627	78.489	4.9685	14.9085	-847.216
BVC	Both	Mat=-10	Pht=-05	Yld=040	Gpc=60	w(-10,-5,40,60)	GPC=0	-1.7258	-7.08031	0.271864	1.7223e-16	63.5341	0.516996	86.627	78.489	4.9685	14.9085	-847.216
BVC	Both	Mat=-10	Pht=-05	Yld=040	Gpc=70	w(-10,-5,40,70)	GPC=0	-1.7258	-7.08031	0.271864	-6.45861e-16	63.5341	0.451456	86.627	78.489	4.9685	14.9085	-847.216
BVC	Both	Mat=-10	Pht=-05	Yld=040	Gpc=80	w(-10,-5,40,80)	GPC=0	-1.7258	-7.08031	0.271864	-6.45861e-16	63.5341	0.398925	86.627	78.489	4.9685	14.9085	-847.216
BVC	Both	Mat=-10	Pht=-05	Yld=050	Gpc=01	w(-10,-5,50,1)	GPC=0	-1.50195	-7.0692	0.322972	1.64513e-16	66.5141	0.899971	86.7445	78.9155	4.9745	15.1855	-765.212
BVC	Both	Mat=-10	Pht=-05	Yld=050	Gpc=10	w(-10,-5,50,10)	GPC=0	-1.50195	-7.0692	0.322972	8.22566e-17	66.5141	0.949202	86.7445	78.9155	4.9745	15.1855	-765.212
BVC	Both	Mat=-10	Pht=-05	Yld=050	Gpc=20	w(-10,-5,50,20)	GPC=0	-1.50195	-7.0692	0.322972	0	66.5141	0.930424	86.7445	78.9155	4.9745	15.1855	-765.212
BVC	Both	Mat=-10	Pht=-05	Yld=050	Gpc=30	w(-10,-5,50,30)	GPC=0	-1.50195	-7.0692	0.322972	3.29026e-16	66.5141	0.846989	86.7445	78.9155	4.9745	15.1855	-765.212
BVC	Both	Mat=-10	Pht=-05	Yld=050	Gpc=40	w(-10,-5,50,40)	GPC=0	-1.50195	-7.0692	0.322972	-2.26206e-16	66.5141	0.739975	86.7445	78.9155	4.9745	15.1855	-765.212
BVC	Both	Mat=-10	Pht=-05	Yld=050	Gpc=50	w(-10,-5,50,50)	GPC=0	-1.50195	-7.0692	0.322972	0	66.5141	0.638597	86.7445	78.9155	4.9745	15.1855	-765.212
BVC	Both	Mat=-10	Pht=-05	Yld=050	Gpc=60	w(-10,-5,50,60)	GPC=0	-1.50195	-7.0692	0.322972	-1.85077e-16	66.5141	0.552869	86.7445	78.9155	4.9745	15.1855	-765.212
BVC	Both	Mat=-10	Pht=-05	Yld=050	Gpc=70	w(-10,-5,50,70)	GPC=0	-1.50195	-7.0692	0.322972	1.64513e-16	66.5141	0.483113	86.7445	78.9155	4.9745	15.1855	-765.212
BVC	Both	Mat=-10	Pht=-05	Yld=050	Gpc=80	w(-10,-5,50,80)	GPC=0	-1.50195	-7.0692	0.322972	-5.14104e-16	66.5141	0.42675	86.7445	78.9155	4.9745	15.1855	-765.212
BVC	Both	Mat=-10	Pht=-05	Yld=060	Gpc=01	w(-10,-5,60,1)	GPC=0	-1.28847	-7.01098	0.367181	-1.56387e-16	69.9705	0.881803	86.886	79.1645	5.002	15.271	-682.721
BVC	Both	Mat=-10	Pht=-05	Yld=060	Gpc=10	w(-10,-5,60,10)	GPC=0	-1.28847	-7.01098	0.367181	-3.12773e-16	69.9705	0.939661	86.886	79.1645	5.002	15.271	-682.721
BVC	Both	Mat=-10	Pht=-05	Yld=060	Gpc=20	w(-10,-5,60,20)	GPC=0	-1.28847	-7.01098	0.367181	-4.88708e-17	69.9705	0.941493	86.886	79.1645	5.002	15.271	-682.721
BVC	Both	Mat=-10	Pht=-05	Yld=060	Gpc=30	w(-10,-5,60,30)	GPC=0	-1.28847	-7.01098	0.367181	-1.56387e-16	69.9705	0.877519	86.886	79.1645	5.002	15.271	-682.721
BVC	Both	Mat=-10	Pht=-05	Yld=060	Gpc=40	w(-10,-5,60,40)	GPC=0	-1.28847	-7.01098	0.367181	1.56387e-16	69.9705	0.779915	86.886	79.1645	5.002	15.271	-682.721
BVC	Both	Mat=-10	Pht=-05	Yld=060	Gpc=50	w(-10,-5,60,50)	GPC=0	-1.28847	-7.01098	0.367181	3.12773e-16	69.9705	0.67974	86.886	79.1645	5.002	15.271	-682.721
BVC	Both	Mat=-10	Pht=-05	Yld=060	Gpc=60	w(-10,-5,60,60)	GPC=0	-1.28847	-7.01098	0.367181	-5.47353e-16	69.9705	0.591369	86.886	79.1645	5.002	15.271	-682.721
BVC	Both	Mat=-10	Pht=-05	Yld=060	Gpc=70	w(-10,-5,60,70)	GPC=0	-1.28847	-7.01098	0.367181	1.56387e-16	69.9705	0.517815	86.886	79.1645	5.002	15.271	-682.721
BVC	Both	Mat=-10	Pht=-05	Yld=060	Gpc=80	w(-10,-5,60,80)	GPC=0	-1.28847	-7.01098	0.367181	3.12773e-16	69.9705	0.457655	86.886	79.1645	5.002	15.271	-682.721
BVC	Both	Mat=-10	Pht=-05	Yld=070	Gpc=01	w(-10,-5,70,1)	GPC=0	-1.08902	-6.91966	0.404969	0	73.8363	0.865114	87.32	78.9795	5.0285	15.3775	-599.545
BVC	Both	Mat=-10	Pht=-05	Yld=070	Gpc=10	w(-10,-5,70,10)	GPC=0	-1.08902	-6.91966	0.404969	1.11149e-16	73.8363	0.927801	87.32	78.9795	5.0285	15.3775	-599.545
BVC	Both	Mat=-10	Pht=-05	Yld=070	Gpc=20	w(-10,-5,70,20)	GPC=0	-1.08902	-6.91966	0.404969	1.48199e-16	73.8363	0.946154	87.32	78.9795	5.0285	15.3775	-599.545
BVC	Both	Mat=-10	Pht=-05	Yld=070	Gpc=30	w(-10,-5,70,30)	GPC=0	-1.08902	-6.91966	0.404969	1.48199e-16	73.8363	0.901859	87.32	78.9795	5.0285	15.3775	-599.545
BVC	Both	Mat=-10	Pht=-05	Yld=070	Gpc=40	w(-10,-5,70,40)	GPC=0	-1.08902	-6.91966	0.404969	7.40994e-17	73.8363	0.816777	87.32	78.9795	5.0285	15.3775	-599.545
BVC	Both	Mat=-10	Pht=-05	Yld=070	Gpc=50	w(-10,-5,70,50)	GPC=0	-1.08902	-6.91966	0.404969	1.48199e-16	73.8363	0.720655	87.32	78.9795	5.0285	15.3775	-599.545
BVC	Both	Mat=-10	Pht=-05	Yld=070	Gpc=60	w(-10,-5,70,60)	GPC=0	-1.08902	-6.91966	0.404969	3.70497e-17	73.8363	0.631306	87.32	78.9795	5.0285	15.3775	-599.545
BVC	Both	Mat=-10	Pht=-05	Yld=070	Gpc=70	w(-10,-5,70,70)	GPC=0	-1.08902	-6.91966	0.404969	-1.85248e-16	73.8363	0.55472	87.32	78.9795	5.0285	15.3775	-599.545
BVC	Both	Mat=-10	Pht=-05	Yld=070	Gpc=80	w(-10,-5,70,80)	GPC=0	-1.08902	-6.91966	0.404969	2.96397e-16	73.8363	0.49103	87.32	78.9795	5.0285	15.3775	-599.545
BVC	Both	Mat=-10	Pht=-05	Yld=080	Gpc=01	w(-10,-5,80,1)	GPC=0	-0.905348	-6.80688	0.437036	3.15442e-16	78.0508	0.850266	87.509	78.977	5.053	15.3835	-516.094
BVC	Both	Mat=-10	Pht=-05	Yld=080	Gpc=10	w(-10,-5,80,10)	GPC=0	-0.905348	-6.80688	0.437036	0	78.0508	0.915034	87.509	78.977	5.053	15.3835	-516.094
BVC	Both	Mat=-10	Pht=-05	Yld=080	Gpc=20	w(-10,-5,80,20)	GPC=0	-0.905348	-6.80688	0.437036	0	78.0508	0.945761	87.509	78.977	5.053	15.3835	-516.094
BVC	Both	Mat=-10	Pht=-05	Yld=080	Gpc=30	w(-10,-5,80,30)	GPC=0	-0.905348	-6.80688	0.437036	-7.00983e-17	78.0508	0.919718	87.509	78.977	5.053	15.3835	-516.094
BVC	Both	Mat=-10	Pht=-05	Yld=080	Gpc=40	w(-10,-5,80,40)	GPC=0	-0.905348	-6.80688	0.437036	7.00983e-17	78.0508	0.849117	87.509	78.977	5.053	15.3835	-516.094
BVC	Both	Mat=-10	Pht=-05	Yld=080	Gpc=50	w(-10,-5,80,50)	GPC=0	-0.905348	-6.80688	0.437036	0	78.0508	0.759785	87.509	78.977	5.053	15.3835	-516.094
BVC	Both	Mat=-10	Pht=-05	Yld=080	Gpc=60	w(-10,-5,80,60)	GPC=0	-0.905348	-6.80688	0.437036	1.40197e-16	78.0508	0.671435	87.509	78.977	5.053	15.3835	-516.094
BVC	Both	Mat=-10	Pht=-05	Yld=080	Gpc=70	w(-10,-5,80,70)	GPC=0	-0.905348	-6.80688	0.437036	2.80393e-16	78.0508	0.592913	87.509	78.977	5.053	15.3835	-516.094
BVC	Both	Mat=-10	Pht=-05	Yld=080	Gpc=80	w(-10,-5,80,80)	GPC=0	-0.905348	-6.80688	0.437036	2.80393e-16	78.0508	0.526202	87.509	78.977	5.053	15.3835	-516.094
BVC	Both	Mat=-10	Pht=-05	Yld=090	Gpc=01	w(-10,-5,90,1)	GPC=0	-0.737849	-6.68167	0.464152	-2.65077e-16	82.5605	0.837303	87.7425	78.833	5.0985	15.287	-432.416
BVC	Both	Mat=-10	Pht=-05	Yld=090	Gpc=10	w(-10,-5,90,10)	GPC=0	-0.737849	-6.68167	0.464152	1.32538e-16	82.5605	0.902299	87.7425	78.833	5.0985	15.287	-432.416
BVC	Both	Mat=-10	Pht=-05	Yld=090	Gpc=20	w(-10,-5,90,20)	GPC=0	-0.737849	-6.68167	0.464152	1.32538e-16	82.5605	0.941756	87.7425	78.833	5.0985	15.287	-432.416
BVC	Both	Mat=-10	Pht=-05	Yld=090	Gpc=30	w(-10,-5,90,30)	GPC=0	-0.737849	-6.68167	0.464152	-6.62692e-17	82.5605	0.931545	87.7425	78.833	5.0985	15.287	-432.416
BVC	Both	Mat=-10	Pht=-05	Yld=090	Gpc=40	w(-10,-5,90,40)	GPC=0	-0.737849	-6.68167	0.464152	0	82.5605	0.876101	87.7425	78.833	5.0985	15.287	-432.416
BVC	Both	Mat=-10	Pht=-05	Yld=090	Gpc=50	w(-10,-5,90,50)	GPC=0	-0.737849	-6.68167	0.464152	-1.98808e-16	82.5605	0.795826	87.7425	78.833	5.0985	15.287	-432.416
BVC	Both	Mat=-10	Pht=-05	Yld=090	Gpc=60	w(-10,-5,90,60)	GPC=0	-0.737849	-6.68167	0.464152	-1.32538e-16	82.5605	0.710554	87.7425	78.833	5.0985	15.287	-432.416
BVC	Both	Mat=-10	Pht=-05	Yld=090	Gpc=70	w(-10,-5,90,70)	GPC=0	-0.737849	-6.68167	0.464152	0	82.5605	0.63145	87.7425	78.833	5.0985	15.287	-432.416
BVC	Both	Mat=-10	Pht=-05	Yld=090	Gpc=80	w(-10,-5,90,80)	GPC=0	-0.737849	-6.68167	0.464152	2.65077e-16	82.5605	0.562463	87.7425	78.833	5.0985	15.287	-432.416
BVC	Both	Mat=-10	Pht=-05	Yld=100	Gpc=01	w(-10,-5,100,1)	GPC=0	-0.586022	-6.55066	0.487063	2.50629e-16	87.3198	0.826106	87.7425	78.833	5.0985	15.287	-348.68
BVC	Both	Mat=-10	Pht=-05	Yld=100	Gpc=10	w(-10,-5,100,10)	GPC=0	-0.586022	-6.55066	0.487063	6.26573e-17	87.3198	0.890149	87.7425	78.833	5.0985	15.287	-348.68
BVC	Both	Mat=-10	Pht=-05	Yld=100	Gpc=20	w(-10,-5,100,20)	GPC=0	-0.586022	-6.55066	0.487063	1.87972e-16	87.3198	0.935406	87.7425	78.833	5.0985	15.287	-348.68
BVC	Both	Mat=-10	Pht=-05	Yld=100	Gpc=30	w(-10,-5,100,30)	GPC=0	-0.586022	-6.55066	0.487063	-1.25315e-16	87.3198	0.938229	87.7425	78.833	5.0985	15.287	-348.68
BVC	Both	Mat=-10	Pht=-05	Yld=100	Gpc=40	w(-10,-5,100,40)	GPC=0	-0.586022	-6.55066	0.487063	3.13286e-16	87.3198	0.897505	87.7425	78.833	5.0985	15.287	-348.68
BVC	Both	Mat=-10	Pht=-05	Yld=100	Gpc=50	w(-10,-5,100,50)	GPC=0	-0.586022	-6.55066	0.487063	5.01258e-16	87.3198	0.827841	87.7425	78.833	5.0985	15.287	-348.68
BVC	Both	Mat=-10	Pht=-05	Yld=100	Gpc=60	w(-10,-5,100,60)	GPC=0	-0.586022	-6.55066	0.487063	2.50629e-16	87.3198	0.747602	87.7425	78.833	5.0985	15.287	-348.68
BVC	Both	Mat=-10	Pht=-05	Yld=100	Gpc=70	w(-10,-5,100,70)	GPC=0	-0.586022	-6.55066	0.487063	2.50629e-16	87.3198	0.66942	87.7425	78.833	5.0985	15.287	-348.68
BVC	Both	Mat=-10	Pht=-05	Yld=100	Gpc=80	w(-10,-5,100,80)	GPC=0	-0.586022	-6.55066	0.487063	0	87.3198	0.599098	87.7425	78.833	5.0985	15.287	-348.68
BVC	Both	Mat=-10	Pht=-05	Yld=110	Gpc=01	w(-10,-5,110,1)	GPC=0	-0.448861	-6.41849	0.506445	0	92.29	0.81648	88.194	78.971	5.183	15.1705	-264.594
BVC	Both	Mat=-10	Pht=-05	Yld=110	Gpc=10	w(-10,-5,110,10)	GPC=0	-0.448861	-6.41849	0.506445	1.18566e-16	92.29	0.878863	88.194	78.971	5.183	15.1705	-264.594
BVC	Both	Mat=-10	Pht=-05	Yld=110	Gpc=20	w(-10,-5,110,20)	GPC=0	-0.448861	-6.41849	0.506445	4.74263e-16	92.29	0.927695	88.194	78.971	5.183	15.1705	-264.594
BVC	Both	Mat=-10	Pht=-05	Yld=110	Gpc=30	w(-10,-5,110,30)	GPC=0	-0.448861	-6.41849	0.506445	1.18566e-16	92.29	0.940816	88.194	78.971	5.183	15.1705	-264.594
BVC	Both	Mat=-10	Pht=-05	Yld=110	Gpc=40	w(-10,-5,110,40)	GPC=0	-0.448861	-6.41849	0.506445	0	92.29	0.913588	88.194	78.971	5.183	15.1705	-264.594
BVC	Both	Mat=-10	Pht=-05	Yld=110	Gpc=50	w(-10,-5,110,50)	GPC=0	-0.448861	-6.41849	0.506445	0	92.29	0.855298	88.194	78.971	5.183	15.1705	-264.594
BVC	Both	Mat=-10	Pht=-05	Yld=110	Gpc=60	w(-10,-5,110,60)	GPC=0	-0.448861	-6.41849	0.506445	0	92.29	0.781729	88.194	78.971	5.183	15.1705	-264.594
BVC	Both	Mat=-10	Pht=-05	Yld=110	Gpc=70	w(-10,-5,110,70)	GPC=0	-0.448861	-6.41849	0.506445	0	92.29	0.705992	88.194	78.971	5.183	15.1705	-264.594
BVC	Both	Mat=-10	Pht=-05	Yld=110	Gpc=80	w(-10,-5,110,80)	GPC=0	-0.448861	-6.41849	0.506445	2.37132e-16	92.29	0.635413	88.194	78.971	5.183	15.1705	-264.594
BVC	Both	Mat=-10	Pht=-05	Yld=120	Gpc=01	w(-10,-5,120,1)	GPC=0	-0.325121	-6.28828	0.522886	3.36902e-16	97.4389	0.808218	88.8615	79.287	5.2495	15.2045	-179.869
BVC	Both	Mat=-10	Pht=-05	Yld=120	Gpc=10	w(-10,-5,120,10)	GPC=0	-0.325121	-6.28828	0.522886	2.24601e-16	97.4389	0.868546	88.8615	79.287	5.2495	15.2045	-179.869
BVC	Both	Mat=-10	Pht=-05	Yld=120	Gpc=20	w(-10,-5,120,20)	GPC=0	-0.325121	-6.28828	0.522886	2.24601e-16	97.4389	0.919332	88.8615	79.287	5.2495	15.2045	-179.869
BVC	Both	Mat=-10	Pht=-05	Yld=120	Gpc=30	w(-10,-5,120,30)	GPC=0	-0.325121	-6.28828	0.522886	2.24601e-16	97.4389	0.940321	88.8615	79.287	5.2495	15.2045	-179.869
BVC	Both	Mat=-10	Pht=-05	Yld=120	Gpc=40	w(-10,-5,120,40)	GPC=0	-0.325121	-6.28828	0.522886	0	97.4389	0.924928	88.8615	79.287	5.2495	15.2045	-179.869
BVC	Both	Mat=-10	Pht=-05	Yld=120	Gpc=50	w(-10,-5,120,50)	GPC=0	-0.325121	-6.28828	0.522886	0	97.4389	0.878052	88.8615	79.287	5.2495	15.2045	-179.869
BVC	Both	Mat=-10	Pht=-05	Yld=120	Gpc=60	w(-10,-5,120,60)	GPC=0	-0.325121	-6.28828	0.522886	-3.36902e-16	97.4389	0.812342	88.8615	79.287	5.2495	15.2045	-179.869
BVC	Both	Mat=-10	Pht=-05	Yld=120	Gpc=70	w(-10,-5,120,70)	GPC=0	-0.325121	-6.28828	0.522886	2.24601e-16	97.4389	0.740458	88.8615	79.287	5.2495	15.2045	-179.869
BVC	Both	Mat=-10	Pht=-05	Yld=120	Gpc=80	w(-10,-5,120,80)	GPC=0	-0.325121	-6.28828	0.522886	-2.24601e-16	97.4389	0.670765	88.8615	79.287	5.2495	15.2045	-179.869
BVC	Both	Mat=-10	Pht=-05	Yld=130	Gpc=01	w(-10,-5,130,1)	GPC=0	-0.213487	-6.16202	0.536882	0	102.74	0.801118	88.8615	79.287	5.2495	15.2045	-94.9789
BVC	Both	Mat=-10	Pht=-05	Yld=130	Gpc=10	w(-10,-5,130,10)	GPC=0	-0.213487	-6.16202	0.536882	0	102.74	0.859204	88.8615	79.287	5.2495	15.2045	-94.9789
BVC	Both	Mat=-10	Pht=-05	Yld=130	Gpc=20	w(-10,-5,130,20)	GPC=0	-0.213487	-6.16202	0.536882	1.06507e-16	102.74	0.910794	88.8615	79.287	5.2495	15.2045	-94.9789
BVC	Both	Mat=-10	Pht=-05	Yld=130	Gpc=30	w(-10,-5,130,30)	GPC=0	-0.213487	-6.16202	0.536882	1.06507e-16	102.74	0.937618	88.8615	79.287	5.2495	15.2045	-94.9789
BVC	Both	Mat=-10	Pht=-05	Yld=130	Gpc=40	w(-10,-5,130,40)	GPC=0	-0.213487	-6.16202	0.536882	0	102.74	0.932253	88.8615	79.287	5.2495	15.2045	-94.9789
BVC	Both	Mat=-10	Pht=-05	Yld=130	Gpc=50	w(-10,-5,130,50)	GPC=0	-0.213487	-6.16202	0.536882	-1.06507e-16	102.74	0.896267	88.8615	79.287	5.2495	15.2045	-94.9789
BVC	Both	Mat=-10	Pht=-05	Yld=130	Gpc=60	w(-10,-5,130,60)	GPC=0	-0.213487	-6.16202	0.536882	0	102.74	0.83911	88.8615	79.287	5.2495	15.2045	-94.9789
BVC	Both	Mat=-10	Pht=-05	Yld=130	Gpc=70	w(-10,-5,130,70)	GPC=0	-0.213487	-6.16202	0.536882	2.13013e-16	102.74	0.772269	88.8615	79.287	5.2495	15.2045	-94.9789
BVC	Both	Mat=-10	Pht=-05	Yld=130	Gpc=80	w(-10,-5,130,80)	GPC=0	-0.213487	-6.16202	0.536882	-1.06507e-16	102.74	0.704586	88.8615	79.287	5.2495	15.2045	-94.9789
BVC	Both	Mat=-10	Pht=-05	Yld=140	Gpc=01	w(-10,-5,140,1)	GPC=0	-0.112671	-6.04091	0.548847	2.0232e-16	108.17	0.795003	88.9385	79.773	5.2915	15.1495	-9.97849
BVC	Both	Mat=-10	Pht=-05	Yld=140	Gpc=10	w(-10,-5,140,10)	GPC=0	-0.112671	-6.04091	0.548847	3.0348e-16	108.17	0.850788	88.9385	79.773	5.2915	15.1495	-9.97849
BVC	Both	Mat=-10	Pht=-05	Yld=140	Gpc=20	w(-10,-5,140,20)	GPC=0	-0.112671	-6.04091	0.548847	1.0116e-16	108.17	0.902384	88.9385	79.773	5.2915	15.1495	-9.97849
BVC	Both	Mat=-10	Pht=-05	Yld=140	Gpc=30	w(-10,-5,140,30)	GPC=0	-0.112671	-6.04091	0.548847	0	108.17	0.933412	88.9385	79.773	5.2915	15.1495	-9.97849
BVC	Both	Mat=-10	Pht=-05	Yld=140	Gpc=40	w(-10,-5,140,40)	GPC=0	-0.112671	-6.04091	0.548847	2.0232e-16	108.17	0.936315	88.9385	79.773	5.2915	15.1495	-9.97849
BVC	Both	Mat=-10	Pht=-05	Yld=140	Gpc=50	w(-10,-5,140,50)	GPC=0	-0.112671	-6.04091	0.548847	0	108.17	0.910321	88.9385	79.773	5.2915	15.1495	-9.97849
BVC	Both	Mat=-10	Pht=-05	Yld=140	Gpc=60	w(-10,-5,140,60)	GPC=0	-0.112671	-6.04091	0.548847	2.0232e-16	108.17	0.861947	88.9385	79.773	5.2915	15.1495	-9.97849
BVC	Both	Mat=-10	Pht=-05	Yld=140	Gpc=70	w(-10,-5,140,70)	GPC=0	-0.112671	-6.04091	0.548847	0	108.17	0.801049	88.9385	79.773	5.2915	15.1495	-9.97849
BVC	Both	Mat=-10	Pht=-05	Yld=140	Gpc=80	w(-10,-5,140,80)	GPC=0	-0.112671	-6.04091	0.548847	-1.0116e-16	108.17	0.736406	88.9385	79.773	5.2915	15.1495	-9.97849
BVC	Both	Mat=-10	Pht=-05	Yld=150	Gpc=01	w(-10,-5,150,1)	GPC=0	-0.0214728	-5.92559	0.559122	1.92461e-16	113.711	0.789716	88.9385	79.773	5.2915	15.1495	75.1319
BVC	Both	Mat=-10	Pht=-05	Yld=150	Gpc=10	w(-10,-5,150,10)	GPC=0	-0.0214728	-5.92559	0.559122	2.88691e-16	113.711	0.843223	88.9385	79.773	5.2915	15.1495	75.1319
BVC	Both	Mat=-10	Pht=-05	Yld=150	Gpc=20	w(-10,-5,150,20)	GPC=0	-0.0214728	-5.92559	0.559122	3.84922e-16	113.711	0.894286	88.9385	79.773	5.2915	15.1495	75.1319
BVC	Both	Mat=-10	Pht=-05	Yld=150	Gpc=30	w(-10,-5,150,30)	GPC=0	-0.0214728	-5.92559	0.559122	0	113.711	0.92824	88.9385	79.773	5.2915	15.1495	75.1319
BVC	Both	Mat=-10	Pht=-05	Yld=150	Gpc=40	w(-10,-5,150,40)	GPC=0	-0.0214728	-5.92559	0.559122	0	113.711	0.937817	88.9385	79.773	5.2915	15.1495	75.1319
BVC	Both	Mat=-10	Pht=-05	Yld=150	Gpc=50	w(-10,-5,150,50)	GPC=0	-0.0214728	-5.92559	0.559122	3.84922e-16	113.711	0.920712	88.9385	79.773	5.2915	15.1495	75.1319
BVC	Both	Mat=-10	Pht=-05	Yld=150	Gpc=60	w(-10,-5,150,60)	GPC=0	-0.0214728	-5.92559	0.559122	3.84922e-16	113.711	0.880961	88.9385	79.773	5.2915	15.1495	75.1319
BVC	Both	Mat=-10	Pht=-05	Yld=150	Gpc=70	w(-10,-5,150,70)	GPC=0	-0.0214728	-5.92559	0.559122	0	113.711	0.826591	88.9385	79.773	5.2915	15.1495	75.1319
BVC	Both	Mat=-10	Pht=-05	Yld=150	Gpc=80	w(-10,-5,150,80)	GPC=0	-0.0214728	-5.92559	0.559122	0	113.711	0.765864	88.9385	79.773	5.2915	15.1495	75.1319
BVC	Both	Mat=-10	Pht=-10	Yld=001	Gpc=01	w(-10,-10,1,1)	GPC=0	-1.38608	-8.10758	0.116097	3.4536e-16	95.0527	0.929002	87.487	76.755	4.7785	14.891	-1337.4
BVC	Both	Mat=-10	Pht=-10	Yld=001	Gpc=10	w(-10,-10,1,10)	GPC=0	-1.38608	-8.10758	0.116097	-2.3024e-16	95.0527	0.957883	87.487	76.755	4.7785	14.891	-1337.4
BVC	Both	Mat=-10	Pht=-10	Yld=001	Gpc=20	w(-10,-10,1,20)	GPC=0	-1.38608	-8.10758	0.116097	0	95.0527	0.951976	87.487	76.755	4.7785	14.891	-1337.4
BVC	Both	Mat=-10	Pht=-10	Yld=001	Gpc=30	w(-10,-10,1,30)	GPC=0	-1.38608	-8.10758	0.116097	-2.3024e-16	95.0527	0.908424	87.487	76.755	4.7785	14.891	-1337.4
BVC	Both	Mat=-10	Pht=-10	Yld=001	Gpc=40	w(-10,-10,1,40)	GPC=0	-1.38608	-8.10758	0.116097	-1.1512e-16	95.0527	0.840697	87.487	76.755	4.7785	14.891	-1337.4
BVC	Both	Mat=-10	Pht=-10	Yld=001	Gpc=50	w(-10,-10,1,50)	GPC=0	-1.38608	-8.10758	0.116097	-2.3024e-16	95.0527	0.764102	87.487	76.755	4.7785	14.891	-1337.4
BVC	Both	Mat=-10	Pht=-10	Yld=001	Gpc=60	w(-10,-10,1,60)	GPC=0	-1.38608	-8.10758	0.116097	-1.1512e-16	95.0527	0.689179	87.487	76.755	4.7785	14.891	-1337.4
BVC	Both	Mat=-10	Pht=-10	Yld=001	Gpc=70	w(-10,-10,1,70)	GPC=0	-1.38608	-8.10758	0.116097	-3.4536e-16	95.0527	0.621031	87.487	76.755	4.7785	14.891	-1337.4
BVC	Both	Mat=-10	Pht=-10	Yld=001	Gpc=80	w(-10,-10,1,80)	GPC=0	-1.38608	-8.10758	0.116097	0	95.0527	0.561212	87.487	76.755	4.7785	14.891	-1337.4
BVC	Both	Mat=-10	Pht=-10	Yld=010	Gpc=01	w(-10,-10,10,1)	GPC=0	-1.27745	-8.19547	0.153985	1.13665e-16	96.2691	0.918045	87.4085	77.056	4.831	15.017	-1265.03
BVC	Both	Mat=-10	Pht=-10	Yld=010	Gpc=10	w(-10,-10,10,10)	GPC=0	-1.27745	-8.19547	0.153985	2.84163e-16	96.2691	0.953445	87.4085	77.056	4.831	15.017	-1265.03
BVC	Both	Mat=-10	Pht=-10	Yld=010	Gpc=20	w(-10,-10,10,20)	GPC=0	-1.27745	-8.19547	0.153985	1.70498e-16	96.2691	0.957067	87.4085	77.056	4.831	15.017	-1265.03
BVC	Both	Mat=-10	Pht=-10	Yld=010	Gpc=30	w(-10,-10,10,30)	GPC=0	-1.27745	-8.19547	0.153985	0	96.2691	0.922212	87.4085	77.056	4.831	15.017	-1265.03
BVC	Both	Mat=-10	Pht=-10	Yld=010	Gpc=40	w(-10,-10,10,40)	GPC=0	-1.27745	-8.19547	0.153985	-1.70498e-16	96.2691	0.859936	87.4085	77.056	4.831	15.017	-1265.03
BVC	Both	Mat=-10	Pht=-10	Yld=010	Gpc=50	w(-10,-10,10,50)	GPC=0	-1.27745	-8.19547	0.153985	-1.13665e-16	96.2691	0.785396	87.4085	77.056	4.831	15.017	-1265.03
BVC	Both	Mat=-10	Pht=-10	Yld=010	Gpc=60	w(-10,-10,10,60)	GPC=0	-1.27745	-8.19547	0.153985	-2.2733e-16	96.2691	0.710239	87.4085	77.056	4.831	15.017	-1265.03
BVC	Both	Mat=-10	Pht=-10	Yld=010	Gpc=70	w(-10,-10,10,70)	GPC=0	-1.27745	-8.19547	0.153985	-1.70498e-16	96.2691	0.640705	87.4085	77.056	4.831	15.017	-1265.03
BVC	Both	Mat=-10	Pht=-10	Yld=010	Gpc=80	w(-10,-10,10,80)	GPC=0	-1.27745	-8.19547	0.153985	-4.54661e-16	96.2691	0.579083	87.4085	77.056	4.831	15.017	-1265.03
BVC	Both	Mat=-10	Pht=-10	Yld=020	Gpc=01	w(-10,-10,20,1)	GPC=0	-1.1553	-8.25749	0.194197	-1.11644e-16	98.0118	0.90501	87.4415	77.152	4.8475	15.0845	-1183.94
BVC	Both	Mat=-10	Pht=-10	Yld=020	Gpc=10	w(-10,-10,20,10)	GPC=0	-1.1553	-8.25749	0.194197	-2.23288e-16	98.0118	0.946291	87.4415	77.152	4.8475	15.0845	-1183.94
BVC	Both	Mat=-10	Pht=-10	Yld=020	Gpc=20	w(-10,-10,20,20)	GPC=0	-1.1553	-8.25749	0.194197	1.11644e-16	98.0118	0.959749	87.4415	77.152	4.8475	15.0845	-1183.94
BVC	Both	Mat=-10	Pht=-10	Yld=020	Gpc=30	w(-10,-10,20,30)	GPC=0	-1.1553	-8.25749	0.194197	-1.11644e-16	98.0118	0.935082	87.4415	77.152	4.8475	15.0845	-1183.94
BVC	Both	Mat=-10	Pht=-10	Yld=020	Gpc=40	w(-10,-10,20,40)	GPC=0	-1.1553	-8.25749	0.194197	-2.23288e-16	98.0118	0.880166	87.4415	77.152	4.8475	15.0845	-1183.94
BVC	Both	Mat=-10	Pht=-10	Yld=020	Gpc=50	w(-10,-10,20,50)	GPC=0	-1.1553	-8.25749	0.194197	-1.11644e-16	98.0118	0.80921	87.4415	77.152	4.8475	15.0845	-1183.94
BVC	Both	Mat=-10	Pht=-10	Yld=020	Gpc=60	w(-10,-10,20,60)	GPC=0	-1.1553	-8.25749	0.194197	-1.11644e-16	98.0118	0.734704	87.4415	77.152	4.8475	15.0845	-1183.94
BVC	Both	Mat=-10	Pht=-10	Yld=020	Gpc=70	w(-10,-10,20,70)	GPC=0	-1.1553	-8.25749	0.194197	1.11644e-16	98.0118	0.664142	87.4415	77.152	4.8475	15.0845	-1183.94
BVC	Both	Mat=-10	Pht=-10	Yld=020	Gpc=80	w(-10,-10,20,80)	GPC=0	-1.1553	-8.25749	0.194197	1.11644e-16	98.0118	0.600751	87.4415	77.152	4.8475	15.0845	-1183.94
BVC	Both	Mat=-10	Pht=-10	Yld=030	Gpc=01	w(-10,-10,30,1)	GPC=0	-1.03337	-8.28488	0.232094	3.27797e-16	100.145	0.89163	87.539	77.37	4.922	15.1595	-1102.32
BVC	Both	Mat=-10	Pht=-10	Yld=030	Gpc=10	w(-10,-10,30,10)	GPC=0	-1.03337	-8.28488	0.232094	-2.18531e-16	100.145	0.937348	87.539	77.37	4.922	15.1595	-1102.32
BVC	Both	Mat=-10	Pht=-10	Yld=030	Gpc=20	w(-10,-10,30,20)	GPC=0	-1.03337	-8.28488	0.232094	1.09266e-16	100.145	0.95948	87.539	77.37	4.922	15.1595	-1102.32
BVC	Both	Mat=-10	Pht=-10	Yld=030	Gpc=30	w(-10,-10,30,30)	GPC=0	-1.03337	-8.28488	0.232094	-5.46328e-17	100.145	0.945029	87.539	77.37	4.922	15.1595	-1102.32
BVC	Both	Mat=-10	Pht=-10	Yld=030	Gpc=40	w(-10,-10,30,40)	GPC=0	-1.03337	-8.28488	0.232094	0	100.145	0.898544	87.539	77.37	4.922	15.1595	-1102.32
BVC	Both	Mat=-10	Pht=-10	Yld=030	Gpc=50	w(-10,-10,30,50)	GPC=0	-1.03337	-8.28488	0.232094	-2.18531e-16	100.145	0.832524	87.539	77.37	4.922	15.1595	-1102.32
BVC	Both	Mat=-10	Pht=-10	Yld=030	Gpc=60	w(-10,-10,30,60)	GPC=0	-1.03337	-8.28488	0.232094	1.09266e-16	100.145	0.759758	87.539	77.37	4.922	15.1595	-1102.32
BVC	Both	Mat=-10	Pht=-10	Yld=030	Gpc=70	w(-10,-10,30,70)	GPC=0	-1.03337	-8.28488	0.232094	-2.73164e-16	100.145	0.688856	87.539	77.37	4.922	15.1595	-1102.32
BVC	Both	Mat=-10	Pht=-10	Yld=030	Gpc=80	w(-10,-10,30,80)	GPC=0	-1.03337	-8.28488	0.232094	0	100.145	0.624057	87.539	77.37	4.922	15.1595	-1102.32
BVC	Both	Mat=-10	Pht=-10	Yld=040	Gpc=01	w(-10,-10,40,1)	GPC=0	-0.913257	-8.28145	0.267453	-1.06605e-16	102.645	0.878383	87.5455	77.524	4.9265	15.226	-1020.26
BVC	Both	Mat=-10	Pht=-10	Yld=040	Gpc=10	w(-10,-10,40,10)	GPC=0	-0.913257	-8.28145	0.267453	5.06372e-16	102.645	0.927203	87.5455	77.524	4.9265	15.226	-1020.26
BVC	Both	Mat=-10	Pht=-10	Yld=040	Gpc=20	w(-10,-10,40,20)	GPC=0	-0.913257	-8.28145	0.267453	-5.33023e-17	102.645	0.956626	87.5455	77.524	4.9265	15.226	-1020.26
BVC	Both	Mat=-10	Pht=-10	Yld=040	Gpc=30	w(-10,-10,40,30)	GPC=0	-0.913257	-8.28145	0.267453	0	102.645	0.951926	87.5455	77.524	4.9265	15.226	-1020.26
BVC	Both	Mat=-10	Pht=-10	Yld=040	Gpc=40	w(-10,-10,40,40)	GPC=0	-0.913257	-8.28145	0.267453	-1.06605e-16	102.645	0.914534	87.5455	77.524	4.9265	15.226	-1020.26
BVC	Both	Mat=-10	Pht=-10	Yld=040	Gpc=50	w(-10,-10,40,50)	GPC=0	-0.913257	-8.28145	0.267453	1.86558e-16	102.645	0.854672	87.5455	77.524	4.9265	15.226	-1020.26
BVC	Both	Mat=-10	Pht=-10	Yld=040	Gpc=60	w(-10,-10,40,60)	GPC=0	-0.913257	-8.28145	0.267453	5.33023e-17	102.645	0.784799	87.5455	77.524	4.9265	15.226	-1020.26
BVC	Both	Mat=-10	Pht=-10	Yld=040	Gpc=70	w(-10,-10,40,70)	GPC=0	-0.913257	-8.28145	0.267453	-5.06372e-16	102.645	0.714376	87.5455	77.524	4.9265	15.226	-1020.26
BVC	Both	Mat=-10	Pht=-10	Yld=040	Gpc=80	w(-10,-10,40,80)	GPC=0	-0.913257	-8.28145	0.267453	1.06605e-16	102.645	0.648659	87.5455	77.524	4.9265	15.226	-1020.26
BVC	Both	Mat=-10	Pht=-10	Yld=050	Gpc=01	w(-10,-10,50,1)	GPC=0	-0.796276	-8.25148	0.300158	0	105.486	0.865625	87.7375	77.616	4.989	15.2335	-937.833
BVC	Both	Mat=-10	Pht=-10	Yld=050	Gpc=10	w(-10,-10,50,10)	GPC=0	-0.796276	-8.25148	0.300158	0	105.486	0.91639	87.7375	77.616	4.989	15.2335	-937.833
BVC	Both	Mat=-10	Pht=-10	Yld=050	Gpc=20	w(-10,-10,50,20)	GPC=0	-0.796276	-8.25148	0.300158	2.26918e-16	105.486	0.951664	87.7375	77.616	4.989	15.2335	-937.833
BVC	Both	Mat=-10	Pht=-10	Yld=050	Gpc=30	w(-10,-10,50,30)	GPC=0	-0.796276	-8.25148	0.300158	1.10217e-16	105.486	0.955867	87.7375	77.616	4.989	15.2335	-937.833
BVC	Both	Mat=-10	Pht=-10	Yld=050	Gpc=40	w(-10,-10,50,40)	GPC=0	-0.796276	-8.25148	0.300158	-3.89003e-17	105.486	0.927783	87.7375	77.616	4.989	15.2335	-937.833
BVC	Both	Mat=-10	Pht=-10	Yld=050	Gpc=50	w(-10,-10,50,50)	GPC=0	-0.796276	-8.25148	0.300158	6.48338e-18	105.486	0.875058	87.7375	77.616	4.989	15.2335	-937.833
BVC	Both	Mat=-10	Pht=-10	Yld=050	Gpc=60	w(-10,-10,50,60)	GPC=0	-0.796276	-8.25148	0.300158	-1.42634e-16	105.486	0.809216	87.7375	77.616	4.989	15.2335	-937.833
BVC	Both	Mat=-10	Pht=-10	Yld=050	Gpc=70	w(-10,-10,50,70)	GPC=0	-0.796276	-8.25148	0.300158	1.03734e-16	105.486	0.740187	87.7375	77.616	4.989	15.2335	-937.833
BVC	Both	Mat=-10	Pht=-10	Yld=050	Gpc=80	w(-10,-10,50,80)	GPC=0	-0.796276	-8.25148	0.300158	-2.20435e-16	105.486	0.674155	87.7375	77.616	4.989	15.2335	-937.833
BVC	Both	Mat=-10	Pht=-10	Yld=060	Gpc=01	w(-10,-10,60,1)	GPC=0	-0.68345	-8.19934	0.330193	2.01445e-16	108.639	0.853594	88.032	77.638	5.024	15.2845	-854.831
BVC	Both	Mat=-10	Pht=-10	Yld=060	Gpc=10	w(-10,-10,60,10)	GPC=0	-0.68345	-8.19934	0.330193	-2.01445e-16	108.639	0.905357	88.032	77.638	5.024	15.2845	-854.831
BVC	Both	Mat=-10	Pht=-10	Yld=060	Gpc=20	w(-10,-10,60,20)	GPC=0	-0.68345	-8.19934	0.330193	1.76264e-16	108.639	0.945109	88.032	77.638	5.024	15.2845	-854.831
BVC	Both	Mat=-10	Pht=-10	Yld=060	Gpc=30	w(-10,-10,60,30)	GPC=0	-0.68345	-8.19934	0.330193	-1.32198e-16	108.639	0.957121	88.032	77.638	5.024	15.2845	-854.831
BVC	Both	Mat=-10	Pht=-10	Yld=060	Gpc=40	w(-10,-10,60,40)	GPC=0	-0.68345	-8.19934	0.330193	-1.38494e-16	108.639	0.938137	88.032	77.638	5.024	15.2845	-854.831
BVC	Both	Mat=-10	Pht=-10	Yld=060	Gpc=50	w(-10,-10,60,50)	GPC=0	-0.68345	-8.19934	0.330193	0	108.639	0.893211	88.032	77.638	5.024	15.2845	-854.831
BVC	Both	Mat=-10	Pht=-10	Yld=060	Gpc=60	w(-10,-10,60,60)	GPC=0	-0.68345	-8.19934	0.330193	-2.01445e-16	108.639	0.832431	88.032	77.638	5.024	15.2845	-854.831
BVC	Both	Mat=-10	Pht=-10	Yld=060	Gpc=70	w(-10,-10,60,70)	GPC=0	-0.68345	-8.19934	0.330193	-2.01445e-16	108.639	0.765751	88.032	77.638	5.024	15.2845	-854.831
BVC	Both	Mat=-10	Pht=-10	Yld=060	Gpc=80	w(-10,-10,60,80)	GPC=0	-0.68345	-8.19934	0.330193	-2.39216e-16	108.639	0.700104	88.032	77.638	5.024	15.2845	-854.831
BVC	Both	Mat=-10	Pht=-10	Yld=070	Gpc=01	w(-10,-10,70,1)	GPC=0	-0.575512	-8.12926	0.357614	2.19668e-16	112.081	0.842429	88.032	77.638	5.024	15.2845	-771.683
BVC	Both	Mat=-10	Pht=-10	Yld=070	Gpc=10	w(-10,-10,70,10)	GPC=0	-0.575512	-8.12926	0.357614	1.9526e-16	112.081	0.894445	88.032	77.638	5.024	15.2845	-771.683
BVC	Both	Mat=-10	Pht=-10	Yld=070	Gpc=20	w(-10,-10,70,20)	GPC=0	-0.575512	-8.12926	0.357614	2.19668e-16	112.081	0.937449	88.032	77.638	5.024	15.2845	-771.683
BVC	Both	Mat=-10	Pht=-10	Yld=070	Gpc=30	w(-10,-10,70,30)	GPC=0	-0.575512	-8.12926	0.357614	0	112.081	0.956068	88.032	77.638	5.024	15.2845	-771.683
BVC	Both	Mat=-10	Pht=-10	Yld=070	Gpc=40	w(-10,-10,70,40)	GPC=0	-0.575512	-8.12926	0.357614	-2.44075e-17	112.081	0.945635	88.032	77.638	5.024	15.2845	-771.683
BVC	Both	Mat=-10	Pht=-10	Yld=070	Gpc=50	w(-10,-10,70,50)	GPC=0	-0.575512	-8.12926	0.357614	1.9526e-16	112.081	0.90882	88.032	77.638	5.024	15.2845	-771.683
BVC	Both	Mat=-10	Pht=-10	Yld=070	Gpc=60	w(-10,-10,70,60)	GPC=0	-0.575512	-8.12926	0.357614	-1.9526e-16	112.081	0.853947	88.032	77.638	5.024	15.2845	-771.683
BVC	Both	Mat=-10	Pht=-10	Yld=070	Gpc=70	w(-10,-10,70,70)	GPC=0	-0.575512	-8.12926	0.357614	3.9052e-16	112.081	0.790551	88.032	77.638	5.024	15.2845	-771.683
BVC	Both	Mat=-10	Pht=-10	Yld=070	Gpc=80	w(-10,-10,70,80)	GPC=0	-0.575512	-8.12926	0.357614	1.9526e-16	112.081	0.726051	88.032	77.638	5.024	15.2845	-771.683
BVC	Both	Mat=-10	Pht=-10	Yld=080	Gpc=01	w(-10,-10,80,1)	GPC=0	-0.472933	-8.04513	0.382535	3.54405e-16	115.783	0.832193	88.104	77.7025	5.0325	15.3075	-688.482
BVC	Both	Mat=-10	Pht=-10	Yld=080	Gpc=10	w(-10,-10,80,10)	GPC=0	-0.472933	-8.04513	0.382535	1.89016e-16	115.783	0.883899	88.104	77.7025	5.0325	15.3075	-688.482
BVC	Both	Mat=-10	Pht=-10	Yld=080	Gpc=20	w(-10,-10,80,20)	GPC=0	-0.472933	-8.04513	0.382535	7.08809e-17	115.783	0.929111	88.104	77.7025	5.0325	15.3075	-688.482
BVC	Both	Mat=-10	Pht=-10	Yld=080	Gpc=30	w(-10,-10,80,30)	GPC=0	-0.472933	-8.04513	0.382535	9.45079e-17	115.783	0.953139	88.104	77.7025	5.0325	15.3075	-688.482
BVC	Both	Mat=-10	Pht=-10	Yld=080	Gpc=40	w(-10,-10,80,40)	GPC=0	-0.472933	-8.04513	0.382535	0	115.783	0.950464	88.104	77.7025	5.0325	15.3075	-688.482
BVC	Both	Mat=-10	Pht=-10	Yld=080	Gpc=50	w(-10,-10,80,50)	GPC=0	-0.472933	-8.04513	0.382535	3.78032e-16	115.783	0.921737	88.104	77.7025	5.0325	15.3075	-688.482
BVC	Both	Mat=-10	Pht=-10	Yld=080	Gpc=60	w(-10,-10,80,60)	GPC=0	-0.472933	-8.04513	0.382535	0	115.783	0.87338	88.104	77.7025	5.0325	15.3075	-688.482
BVC	Both	Mat=-10	Pht=-10	Yld=080	Gpc=70	w(-10,-10,80,70)	GPC=0	-0.472933	-8.04513	0.382535	1.89016e-16	115.783	0.814115	88.104	77.7025	5.0325	15.3075	-688.482
BVC	Both	Mat=-10	Pht=-10	Yld=080	Gpc=80	w(-10,-10,80,80)	GPC=0	-0.472933	-8.04513	0.382535	0	115.783	0.751545	88.104	77.7025	5.0325	15.3075	-688.482
BVC	Both	Mat=-10	Pht=-10	Yld=090	Gpc=01	w(-10,-10,90,1)	GPC=0	-0.375965	-7.95043	0.405106	3.19892e-16	119.724	0.822891	88.3275	77.823	5.049	15.3685	-604.993
BVC	Both	Mat=-10	Pht=-10	Yld=090	Gpc=10	w(-10,-10,90,10)	GPC=0	-0.375965	-7.95043	0.405106	0	119.724	0.873879	88.3275	77.823	5.049	15.3685	-604.993
BVC	Both	Mat=-10	Pht=-10	Yld=090	Gpc=20	w(-10,-10,90,20)	GPC=0	-0.375965	-7.95043	0.405106	1.82795e-16	119.724	0.920444	88.3275	77.823	5.049	15.3685	-604.993
BVC	Both	Mat=-10	Pht=-10	Yld=090	Gpc=30	w(-10,-10,90,30)	GPC=0	-0.375965	-7.95043	0.405106	0	119.724	0.948761	88.3275	77.823	5.049	15.3685	-604.993
BVC	Both	Mat=-10	Pht=-10	Yld=090	Gpc=40	w(-10,-10,90,40)	GPC=0	-0.375965	-7.95043	0.405106	1.82795e-16	119.724	0.952918	88.3275	77.823	5.049	15.3685	-604.993
BVC	Both	Mat=-10	Pht=-10	Yld=090	Gpc=50	w(-10,-10,90,50)	GPC=0	-0.375965	-7.95043	0.405106	4.56988e-17	119.724	0.931968	88.3275	77.823	5.049	15.3685	-604.993
BVC	Both	Mat=-10	Pht=-10	Yld=090	Gpc=60	w(-10,-10,90,60)	GPC=0	-0.375965	-7.95043	0.405106	1.82795e-16	119.724	0.890472	88.3275	77.823	5.049	15.3685	-604.993
BVC	Both	Mat=-10	Pht=-10	Yld=090	Gpc=70	w(-10,-10,90,70)	GPC=0	-0.375965	-7.95043	0.405106	4.56988e-17	119.724	0.836046	88.3275	77.823	5.049	15.3685	-604.993
BVC	Both	Mat=-10	Pht=-10	Yld=090	Gpc=80	w(-10,-10,90,80)	GPC=0	-0.375965	-7.95043	0.405106	0	119.724	0.776163	88.3275	77.823	5.049	15.3685	-604.993
BVC	Both	Mat=-10	Pht=-10	Yld=100	Gpc=01	w(-10,-10,100,1)	GPC=0	-0.284682	-7.84813	0.425501	3.97495e-16	123.878	0.814492	88.3275	77.823	5.049	15.3685	-521.418
BVC	Both	Mat=-10	Pht=-10	Yld=100	Gpc=10	w(-10,-10,100,10)	GPC=0	-0.284682	-7.84813	0.425501	3.53329e-16	123.878	0.864476	88.3275	77.823	5.049	15.3685	-521.418
BVC	Both	Mat=-10	Pht=-10	Yld=100	Gpc=20	w(-10,-10,100,20)	GPC=0	-0.284682	-7.84813	0.425501	2.20831e-16	123.878	0.911716	88.3275	77.823	5.049	15.3685	-521.418
BVC	Both	Mat=-10	Pht=-10	Yld=100	Gpc=30	w(-10,-10,100,30)	GPC=0	-0.284682	-7.84813	0.425501	2.20831e-16	123.878	0.943328	88.3275	77.823	5.049	15.3685	-521.418
BVC	Both	Mat=-10	Pht=-10	Yld=100	Gpc=40	w(-10,-10,100,40)	GPC=0	-0.284682	-7.84813	0.425501	3.53329e-16	123.878	0.953342	88.3275	77.823	5.049	15.3685	-521.418
BVC	Both	Mat=-10	Pht=-10	Yld=100	Gpc=50	w(-10,-10,100,50)	GPC=0	-0.284682	-7.84813	0.425501	-1.76664e-16	123.878	0.939643	88.3275	77.823	5.049	15.3685	-521.418
BVC	Both	Mat=-10	Pht=-10	Yld=100	Gpc=60	w(-10,-10,100,60)	GPC=0	-0.284682	-7.84813	0.425501	1.76664e-16	123.878	0.905096	88.3275	77.823	5.049	15.3685	-521.418
BVC	Both	Mat=-10	Pht=-10	Yld=100	Gpc=70	w(-10,-10,100,70)	GPC=0	-0.284682	-7.84813	0.425501	1.76664e-16	123.878	0.856043	88.3275	77.823	5.049	15.3685	-521.418
BVC	Both	Mat=-10	Pht=-10	Yld=100	Gpc=80	w(-10,-10,100,80)	GPC=0	-0.284682	-7.84813	0.425501	3.53329e-16	123.878	0.799536	88.3275	77.823	5.049	15.3685	-521.418
BVC	Both	Mat=-10	Pht=-10	Yld=110	Gpc=01	w(-10,-10,110,1)	GPC=0	-0.199022	-7.74076	0.4439	-1.70673e-16	128.227	0.806943	88.405	77.929	5.064	15.379	-437.705
BVC	Both	Mat=-10	Pht=-10	Yld=110	Gpc=10	w(-10,-10,110,10)	GPC=0	-0.199022	-7.74076	0.4439	3.41346e-16	128.227	0.855733	88.405	77.929	5.064	15.379	-437.705
BVC	Both	Mat=-10	Pht=-10	Yld=110	Gpc=20	w(-10,-10,110,20)	GPC=0	-0.199022	-7.74076	0.4439	3.41346e-16	128.227	0.903123	88.405	77.929	5.064	15.379	-437.705
BVC	Both	Mat=-10	Pht=-10	Yld=110	Gpc=30	w(-10,-10,110,30)	GPC=0	-0.199022	-7.74076	0.4439	0	128.227	0.937177	88.405	77.929	5.064	15.379	-437.705
BVC	Both	Mat=-10	Pht=-10	Yld=110	Gpc=40	w(-10,-10,110,40)	GPC=0	-0.199022	-7.74076	0.4439	0	128.227	0.952097	88.405	77.929	5.064	15.379	-437.705
BVC	Both	Mat=-10	Pht=-10	Yld=110	Gpc=50	w(-10,-10,110,50)	GPC=0	-0.199022	-7.74076	0.4439	0	128.227	0.944983	88.405	77.929	5.064	15.379	-437.705
BVC	Both	Mat=-10	Pht=-10	Yld=110	Gpc=60	w(-10,-10,110,60)	GPC=0	-0.199022	-7.74076	0.4439	0	128.227	0.917247	88.405	77.929	5.064	15.379	-437.705
BVC	Both	Mat=-10	Pht=-10	Yld=110	Gpc=70	w(-10,-10,110,70)	GPC=0	-0.199022	-7.74076	0.4439	1.70673e-16	128.227	0.873903	88.405	77.929	5.064	15.379	-437.705
BVC	Both	Mat=-10	Pht=-10	Yld=110	Gpc=80	w(-10,-10,110,80)	GPC=0	-0.199022	-7.74076	0.4439	-1.70673e-16	128.227	0.821356	88.405	77.929	5.064	15.379	-437.705
BVC	Both	Mat=-10	Pht=-10	Yld=120	Gpc=01	w(-10,-10,120,1)	GPC=0	-0.118825	-7.63037	0.460485	3.29715e-16	132.75	0.800179	88.464	78.1365	5.062	15.4475	-353.882
BVC	Both	Mat=-10	Pht=-10	Yld=120	Gpc=10	w(-10,-10,120,10)	GPC=0	-0.118825	-7.63037	0.460485	1.64858e-16	132.75	0.847656	88.464	78.1365	5.062	15.4475	-353.882
BVC	Both	Mat=-10	Pht=-10	Yld=120	Gpc=20	w(-10,-10,120,20)	GPC=0	-0.118825	-7.63037	0.460485	3.29715e-16	132.75	0.894802	88.464	78.1365	5.062	15.4475	-353.882
BVC	Both	Mat=-10	Pht=-10	Yld=120	Gpc=30	w(-10,-10,120,30)	GPC=0	-0.118825	-7.63037	0.460485	8.24288e-17	132.75	0.930585	88.464	78.1365	5.062	15.4475	-353.882
BVC	Both	Mat=-10	Pht=-10	Yld=120	Gpc=40	w(-10,-10,120,40)	GPC=0	-0.118825	-7.63037	0.460485	0	132.75	0.949529	88.464	78.1365	5.062	15.4475	-353.882
BVC	Both	Mat=-10	Pht=-10	Yld=120	Gpc=50	w(-10,-10,120,50)	GPC=0	-0.118825	-7.63037	0.460485	2.47286e-16	132.75	0.94826	88.464	78.1365	5.062	15.4475	-353.882
BVC	Both	Mat=-10	Pht=-10	Yld=120	Gpc=60	w(-10,-10,120,60)	GPC=0	-0.118825	-7.63037	0.460485	-8.24288e-17	132.75	0.927014	88.464	78.1365	5.062	15.4475	-353.882
BVC	Both	Mat=-10	Pht=-10	Yld=120	Gpc=70	w(-10,-10,120,70)	GPC=0	-0.118825	-7.63037	0.460485	3.29715e-16	132.75	0.889527	88.464	78.1365	5.062	15.4475	-353.882
BVC	Both	Mat=-10	Pht=-10	Yld=120	Gpc=80	w(-10,-10,120,80)	GPC=0	-0.118825	-7.63037	0.460485	3.29715e-16	132.75	0.841393	88.464	78.1365	5.062	15.4475	-353.882
BVC	Both	Mat=-10	Pht=-10	Yld=130	Gpc=01	w(-10,-10,130,1)	GPC=0	-0.0438634	-7.51863	0.475432	-1.59243e-16	137.431	0.794127	88.464	78.1365	5.062	15.4475	-270.008
BVC	Both	Mat=-10	Pht=-10	Yld=130	Gpc=10	w(-10,-10,130,10)	GPC=0	-0.0438634	-7.51863	0.475432	3.18485e-16	137.431	0.84023	88.464	78.1365	5.062	15.4475	-270.008
BVC	Both	Mat=-10	Pht=-10	Yld=130	Gpc=20	w(-10,-10,130,20)	GPC=0	-0.0438634	-7.51863	0.475432	3.18485e-16	137.431	0.886838	88.464	78.1365	5.062	15.4475	-270.008
BVC	Both	Mat=-10	Pht=-10	Yld=130	Gpc=30	w(-10,-10,130,30)	GPC=0	-0.0438634	-7.51863	0.475432	1.59243e-16	137.431	0.923771	88.464	78.1365	5.062	15.4475	-270.008
BVC	Both	Mat=-10	Pht=-10	Yld=130	Gpc=40	w(-10,-10,130,40)	GPC=0	-0.0438634	-7.51863	0.475432	1.59243e-16	137.431	0.945949	88.464	78.1365	5.062	15.4475	-270.008
BVC	Both	Mat=-10	Pht=-10	Yld=130	Gpc=50	w(-10,-10,130,50)	GPC=0	-0.0438634	-7.51863	0.475432	7.96213e-17	137.431	0.949768	88.464	78.1365	5.062	15.4475	-270.008
BVC	Both	Mat=-10	Pht=-10	Yld=130	Gpc=60	w(-10,-10,130,60)	GPC=0	-0.0438634	-7.51863	0.475432	-1.59243e-16	137.431	0.934563	88.464	78.1365	5.062	15.4475	-270.008
BVC	Both	Mat=-10	Pht=-10	Yld=130	Gpc=70	w(-10,-10,130,70)	GPC=0	-0.0438634	-7.51863	0.475432	2.90197e-16	137.431	0.902904	88.464	78.1365	5.062	15.4475	-270.008
BVC	Both	Mat=-10	Pht=-10	Yld=130	Gpc=80	w(-10,-10,130,80)	GPC=0	-0.0438634	-7.51863	0.475432	0	137.431	0.859494	88.464	78.1365	5.062	15.4475	-270.008
BVC	Both	Mat=-10	Pht=-10	Yld=140	Gpc=01	w(-10,-10,140,1)	GPC=0	0.0261344	-7.40685	0.488906	0	142.254	0.78872	88.443	78.102	5.108	15.3155	-186.096
BVC	Both	Mat=-10	Pht=-10	Yld=140	Gpc=10	w(-10,-10,140,10)	GPC=0	0.0261344	-7.40685	0.488906	7.69219e-17	142.254	0.833421	88.443	78.102	5.108	15.3155	-186.096
BVC	Both	Mat=-10	Pht=-10	Yld=140	Gpc=20	w(-10,-10,140,20)	GPC=0	0.0261344	-7.40685	0.488906	-7.69219e-17	142.254	0.879284	88.443	78.102	5.108	15.3155	-186.096
BVC	Both	Mat=-10	Pht=-10	Yld=140	Gpc=30	w(-10,-10,140,30)	GPC=0	0.0261344	-7.40685	0.488906	7.69219e-17	142.254	0.916902	88.443	78.102	5.108	15.3155	-186.096
BVC	Both	Mat=-10	Pht=-10	Yld=140	Gpc=40	w(-10,-10,140,40)	GPC=0	0.0261344	-7.40685	0.488906	7.69219e-17	142.254	0.941625	88.443	78.102	5.108	15.3155	-186.096
BVC	Both	Mat=-10	Pht=-10	Yld=140	Gpc=50	w(-10,-10,140,50)	GPC=0	0.0261344	-7.40685	0.488906	7.69219e-17	142.254	0.9498	88.443	78.102	5.108	15.3155	-186.096
BVC	Both	Mat=-10	Pht=-10	Yld=140	Gpc=60	w(-10,-10,140,60)	GPC=0	0.0261344	-7.40685	0.488906	4.61531e-16	142.254	0.940104	88.443	78.102	5.108	15.3155	-186.096
BVC	Both	Mat=-10	Pht=-10	Yld=140	Gpc=70	w(-10,-10,140,70)	GPC=0	0.0261344	-7.40685	0.488906	1.53844e-16	142.254	0.914099	88.443	78.102	5.108	15.3155	-186.096
BVC	Both	Mat=-10	Pht=-10	Yld=140	Gpc=80	w(-10,-10,140,80)	GPC=0	0.0261344	-7.40685	0.488906	-1.53844e-16	142.254	0.875582	88.443	78.102	5.108	15.3155	-186.096
BVC	Both	Mat=-10	Pht=-10	Yld=150	Gpc=01	w(-10,-10,150,1)	GPC=0	0.091462	-7.29606	0.501059	1.4867e-16	147.205	0.783888	88.443	78.102	5.108	15.3155	-102.144
BVC	Both	Mat=-10	Pht=-10	Yld=150	Gpc=10	w(-10,-10,150,10)	GPC=0	0.091462	-7.29606	0.501059	0	147.205	0.827192	88.443	78.102	5.108	15.3155	-102.144
BVC	Both	Mat=-10	Pht=-10	Yld=150	Gpc=20	w(-10,-10,150,20)	GPC=0	0.091462	-7.29606	0.501059	0	147.205	0.872163	88.443	78.102	5.108	15.3155	-102.144
BVC	Both	Mat=-10	Pht=-10	Yld=150	Gpc=30	w(-10,-10,150,30)	GPC=0	0.091462	-7.29606	0.501059	0	147.205	0.910099	88.443	78.102	5.108	15.3155	-102.144
BVC	Both	Mat=-10	Pht=-10	Yld=150	Gpc=40	w(-10,-10,150,40)	GPC=0	0.091462	-7.29606	0.501059	-2.97339e-16	147.205	0.936783	88.443	78.102	5.108	15.3155	-102.144
BVC	Both	Mat=-10	Pht=-10	Yld=150	Gpc=50	w(-10,-10,150,50)	GPC=0	0.091462	-7.29606	0.501059	2.97339e-16	147.205	0.948631	88.443	78.102	5.108	15.3155	-102.144
BVC	Both	Mat=-10	Pht=-10	Yld=150	Gpc=60	w(-10,-10,150,60)	GPC=0	0.091462	-7.29606	0.501059	0	147.205	0.943874	88.443	78.102	5.108	15.3155	-102.144
BVC	Both	Mat=-10	Pht=-10	Yld=150	Gpc=70	w(-10,-10,150,70)	GPC=0	0.091462	-7.29606	0.501059	0	147.205	0.923236	88.443	78.102	5.108	15.3155	-102.144
BVC	Both	Mat=-10	Pht=-10	Yld=150	Gpc=80	w(-10,-10,150,80)	GPC=0	0.091462	-7.29606	0.501059	0	147.205	0.889649	88.443	78.102	5.108	15.3155	-102.144
BVC	Both	Mat=-10	Pht=-15	Yld=001	Gpc=01	w(-10,-15,1,1)	GPC=0	-0.846183	-8.55244	0.154967	3.19713e-16	136.903	0.896991	88.128	76.285	4.84	14.943	-1507.36
BVC	Both	Mat=-10	Pht=-15	Yld=001	Gpc=10	w(-10,-15,1,10)	GPC=0	-0.846183	-8.55244	0.154967	-7.99283e-17	136.903	0.930974	88.128	76.285	4.84	14.943	-1507.36
BVC	Both	Mat=-10	Pht=-15	Yld=001	Gpc=20	w(-10,-15,1,20)	GPC=0	-0.846183	-8.55244	0.154967	-1.00089e-16	136.903	0.95424	88.128	76.285	4.84	14.943	-1507.36
BVC	Both	Mat=-10	Pht=-15	Yld=001	Gpc=30	w(-10,-15,1,30)	GPC=0	-0.846183	-8.55244	0.154967	-7.99283e-17	136.903	0.958568	88.128	76.285	4.84	14.943	-1507.36
BVC	Both	Mat=-10	Pht=-15	Yld=001	Gpc=40	w(-10,-15,1,40)	GPC=0	-0.846183	-8.55244	0.154967	-7.99283e-17	136.903	0.943184	88.128	76.285	4.84	14.943	-1507.36
BVC	Both	Mat=-10	Pht=-15	Yld=001	Gpc=50	w(-10,-15,1,50)	GPC=0	-0.846183	-8.55244	0.154967	-1.59857e-16	136.903	0.910755	88.128	76.285	4.84	14.943	-1507.36
BVC	Both	Mat=-10	Pht=-15	Yld=001	Gpc=60	w(-10,-15,1,60)	GPC=0	-0.846183	-8.55244	0.154967	-2.39785e-16	136.903	0.866217	88.128	76.285	4.84	14.943	-1507.36
BVC	Both	Mat=-10	Pht=-15	Yld=001	Gpc=70	w(-10,-15,1,70)	GPC=0	-0.846183	-8.55244	0.154967	1.59857e-16	136.903	0.814979	88.128	76.285	4.84	14.943	-1507.36
BVC	Both	Mat=-10	Pht=-15	Yld=001	Gpc=80	w(-10,-15,1,80)	GPC=0	-0.846183	-8.55244	0.154967	-1.59857e-16	136.903	0.761581	88.128	76.285	4.84	14.943	-1507.36
BVC	Both	Mat=-10	Pht=-15	Yld=010	Gpc=01	w(-10,-15,10,1)	GPC=0	-0.773576	-8.59147	0.180647	0	138.414	0.888204	88.128	76.285	4.84	14.943	-1434.62
BVC	Both	Mat=-10	Pht=-15	Yld=010	Gpc=10	w(-10,-15,10,10)	GPC=0	-0.773576	-8.59147	0.180647	1.58112e-16	138.414	0.924084	88.128	76.285	4.84	14.943	-1434.62
BVC	Both	Mat=-10	Pht=-15	Yld=010	Gpc=20	w(-10,-15,10,20)	GPC=0	-0.773576	-8.59147	0.180647	0	138.414	0.950758	88.128	76.285	4.84	14.943	-1434.62
BVC	Both	Mat=-10	Pht=-15	Yld=010	Gpc=30	w(-10,-15,10,30)	GPC=0	-0.773576	-8.59147	0.180647	-1.58112e-16	138.414	0.959513	88.128	76.285	4.84	14.943	-1434.62
BVC	Both	Mat=-10	Pht=-15	Yld=010	Gpc=40	w(-10,-15,10,40)	GPC=0	-0.773576	-8.59147	0.180647	-3.16223e-16	138.414	0.94883	88.128	76.285	4.84	14.943	-1434.62
BVC	Both	Mat=-10	Pht=-15	Yld=010	Gpc=50	w(-10,-15,10,50)	GPC=0	-0.773576	-8.59147	0.180647	-3.16223e-16	138.414	0.920552	88.128	76.285	4.84	14.943	-1434.62
BVC	Both	Mat=-10	Pht=-15	Yld=010	Gpc=60	w(-10,-15,10,60)	GPC=0	-0.773576	-8.59147	0.180647	-3.16223e-16	138.414	0.879075	88.128	76.285	4.84	14.943	-1434.62
BVC	Both	Mat=-10	Pht=-15	Yld=010	Gpc=70	w(-10,-15,10,70)	GPC=0	-0.773576	-8.59147	0.180647	-1.58112e-16	138.414	0.829678	88.128	76.285	4.84	14.943	-1434.62
BVC	Both	Mat=-10	Pht=-15	Yld=010	Gpc=80	w(-10,-15,10,80)	GPC=0	-0.773576	-8.59147	0.180647	-1.58112e-16	138.414	0.777067	88.128	76.285	4.84	14.943	-1434.62
BVC	Both	Mat=-10	Pht=-15	Yld=020	Gpc=01	w(-10,-15,20,1)	GPC=0	-0.693421	-8.61748	0.208135	0	140.359	0.878417	88.309	76.2745	4.9	14.9685	-1353.47
BVC	Both	Mat=-10	Pht=-15	Yld=020	Gpc=10	w(-10,-15,20,10)	GPC=0	-0.693421	-8.61748	0.208135	0	140.359	0.915936	88.309	76.2745	4.9	14.9685	-1353.47
BVC	Both	Mat=-10	Pht=-15	Yld=020	Gpc=20	w(-10,-15,20,20)	GPC=0	-0.693421	-8.61748	0.208135	-7.79604e-17	140.359	0.945874	88.309	76.2745	4.9	14.9685	-1353.47
BVC	Both	Mat=-10	Pht=-15	Yld=020	Gpc=30	w(-10,-15,20,30)	GPC=0	-0.693421	-8.61748	0.208135	0	140.359	0.959182	88.309	76.2745	4.9	14.9685	-1353.47
BVC	Both	Mat=-10	Pht=-15	Yld=020	Gpc=40	w(-10,-15,20,40)	GPC=0	-0.693421	-8.61748	0.208135	-1.55921e-16	140.359	0.953642	88.309	76.2745	4.9	14.9685	-1353.47
BVC	Both	Mat=-10	Pht=-15	Yld=020	Gpc=50	w(-10,-15,20,50)	GPC=0	-0.693421	-8.61748	0.208135	3.89802e-17	140.359	0.930198	88.309	76.2745	4.9	14.9685	-1353.47
BVC	Both	Mat=-10	Pht=-15	Yld=020	Gpc=60	w(-10,-15,20,60)	GPC=0	-0.693421	-8.61748	0.208135	-7.79604e-17	140.359	0.892537	88.309	76.2745	4.9	14.9685	-1353.47
BVC	Both	Mat=-10	Pht=-15	Yld=020	Gpc=70	w(-10,-15,20,70)	GPC=0	-0.693421	-8.61748	0.208135	7.79604e-17	140.359	0.845652	88.309	76.2745	4.9	14.9685	-1353.47
BVC	Both	Mat=-10	Pht=-15	Yld=020	Gpc=80	w(-10,-15,20,80)	GPC=0	-0.693421	-8.61748	0.208135	-3.11841e-16	140.359	0.794335	88.309	76.2745	4.9	14.9685	-1353.47
BVC	Both	Mat=-10	Pht=-15	Yld=030	Gpc=01	w(-10,-15,30,1)	GPC=0	-0.614296	-8.62648	0.234429	0	142.573	0.868758	88.3495	76.6605	4.9335	15.124	-1271.93
BVC	Both	Mat=-10	Pht=-15	Yld=030	Gpc=10	w(-10,-15,30,10)	GPC=0	-0.614296	-8.62648	0.234429	-1.535e-16	142.573	0.907462	88.3495	76.6605	4.9335	15.124	-1271.93
BVC	Both	Mat=-10	Pht=-15	Yld=030	Gpc=20	w(-10,-15,30,20)	GPC=0	-0.614296	-8.62648	0.234429	0	142.573	0.940112	88.3495	76.6605	4.9335	15.124	-1271.93
BVC	Both	Mat=-10	Pht=-15	Yld=030	Gpc=30	w(-10,-15,30,30)	GPC=0	-0.614296	-8.62648	0.234429	-3.06999e-16	142.573	0.957517	88.3495	76.6605	4.9335	15.124	-1271.93
BVC	Both	Mat=-10	Pht=-15	Yld=030	Gpc=40	w(-10,-15,30,40)	GPC=0	-0.614296	-8.62648	0.234429	1.535e-16	142.573	0.956919	88.3495	76.6605	4.9335	15.124	-1271.93
BVC	Both	Mat=-10	Pht=-15	Yld=030	Gpc=50	w(-10,-15,30,50)	GPC=0	-0.614296	-8.62648	0.234429	-1.15125e-16	142.573	0.938417	88.3495	76.6605	4.9335	15.124	-1271.93
BVC	Both	Mat=-10	Pht=-15	Yld=030	Gpc=60	w(-10,-15,30,60)	GPC=0	-0.614296	-8.62648	0.234429	-1.535e-16	142.573	0.904925	88.3495	76.6605	4.9335	15.124	-1271.93
BVC	Both	Mat=-10	Pht=-15	Yld=030	Gpc=70	w(-10,-15,30,70)	GPC=0	-0.614296	-8.62648	0.234429	-3.06999e-16	142.573	0.861014	88.3495	76.6605	4.9335	15.124	-1271.93
BVC	Both	Mat=-10	Pht=-15	Yld=030	Gpc=80	w(-10,-15,30,80)	GPC=0	-0.614296	-8.62648	0.234429	0	142.573	0.811439	88.3495	76.6605	4.9335	15.124	-1271.93
BVC	Both	Mat=-10	Pht=-15	Yld=040	Gpc=01	w(-10,-15,40,1)	GPC=0	-0.53664	-8.61991	0.259459	-1.50885e-16	145.043	0.859355	88.3805	76.829	4.946	15.19	-1189.8
BVC	Both	Mat=-10	Pht=-15	Yld=040	Gpc=10	w(-10,-15,40,10)	GPC=0	-0.53664	-8.61991	0.259459	2.82909e-16	145.043	0.898842	88.3805	76.829	4.946	15.19	-1189.8
BVC	Both	Mat=-10	Pht=-15	Yld=040	Gpc=20	w(-10,-15,40,20)	GPC=0	-0.53664	-8.61991	0.259459	-3.0177e-16	145.043	0.933673	88.3805	76.829	4.946	15.19	-1189.8
BVC	Both	Mat=-10	Pht=-15	Yld=040	Gpc=30	w(-10,-15,40,30)	GPC=0	-0.53664	-8.61991	0.259459	7.54425e-17	145.043	0.954678	88.3805	76.829	4.946	15.19	-1189.8
BVC	Both	Mat=-10	Pht=-15	Yld=040	Gpc=40	w(-10,-15,40,40)	GPC=0	-0.53664	-8.61991	0.259459	2.07467e-16	145.043	0.958716	88.3805	76.829	4.946	15.19	-1189.8
BVC	Both	Mat=-10	Pht=-15	Yld=040	Gpc=50	w(-10,-15,40,50)	GPC=0	-0.53664	-8.61991	0.259459	1.32024e-16	145.043	0.945142	88.3805	76.829	4.946	15.19	-1189.8
BVC	Both	Mat=-10	Pht=-15	Yld=040	Gpc=60	w(-10,-15,40,60)	GPC=0	-0.53664	-8.61991	0.259459	1.50885e-16	145.043	0.916071	88.3805	76.829	4.946	15.19	-1189.8
BVC	Both	Mat=-10	Pht=-15	Yld=040	Gpc=70	w(-10,-15,40,70)	GPC=0	-0.53664	-8.61991	0.259459	-1.32024e-16	145.043	0.87554	88.3805	76.829	4.946	15.19	-1189.8
BVC	Both	Mat=-10	Pht=-15	Yld=040	Gpc=80	w(-10,-15,40,80)	GPC=0	-0.53664	-8.61991	0.259459	-7.54425e-17	145.043	0.828148	88.3805	76.829	4.946	15.19	-1189.8
BVC	Both	Mat=-10	Pht=-15	Yld=050	Gpc=01	w(-10,-15,50,1)	GPC=0	-0.460823	-8.59936	0.283183	2.59198e-16	147.758	0.850306	88.9065	76.657	4.995	15.209	-1107.1
BVC	Both	Mat=-10	Pht=-15	Yld=050	Gpc=10	w(-10,-15,50,10)	GPC=0	-0.460823	-8.59936	0.283183	1.11085e-16	147.758	0.890228	88.9065	76.657	4.995	15.209	-1107.1
BVC	Both	Mat=-10	Pht=-15	Yld=050	Gpc=20	w(-10,-15,50,20)	GPC=0	-0.460823	-8.59936	0.283183	1.66627e-16	147.758	0.926746	88.9065	76.657	4.995	15.209	-1107.1
BVC	Both	Mat=-10	Pht=-15	Yld=050	Gpc=30	w(-10,-15,50,30)	GPC=0	-0.460823	-8.59936	0.283183	-1.48113e-16	147.758	0.950842	88.9065	76.657	4.995	15.209	-1107.1
BVC	Both	Mat=-10	Pht=-15	Yld=050	Gpc=40	w(-10,-15,50,40)	GPC=0	-0.460823	-8.59936	0.283183	-2.31427e-17	147.758	0.959135	88.9065	76.657	4.995	15.209	-1107.1
BVC	Both	Mat=-10	Pht=-15	Yld=050	Gpc=50	w(-10,-15,50,50)	GPC=0	-0.460823	-8.59936	0.283183	-2.31427e-17	147.758	0.950357	88.9065	76.657	4.995	15.209	-1107.1
BVC	Both	Mat=-10	Pht=-15	Yld=050	Gpc=60	w(-10,-15,50,60)	GPC=0	-0.460823	-8.59936	0.283183	-2.26798e-16	147.758	0.925849	88.9065	76.657	4.995	15.209	-1107.1
BVC	Both	Mat=-10	Pht=-15	Yld=050	Gpc=70	w(-10,-15,50,70)	GPC=0	-0.460823	-8.59936	0.283183	4.4434e-16	147.758	0.889036	88.9065	76.657	4.995	15.209	-1107.1
BVC	Both	Mat=-10	Pht=-15	Yld=050	Gpc=80	w(-10,-15,50,80)	GPC=0	-0.460823	-8.59936	0.283183	1.48113e-16	147.758	0.844239	88.9065	76.657	4.995	15.209	-1107.1
BVC	Both	Mat=-10	Pht=-15	Yld=060	Gpc=01	w(-10,-15,60,1)	GPC=0	-0.387148	-8.56642	0.305582	1.99676e-16	150.703	0.84168	88.8355	77.1175	5.0225	15.3225	-1024.17
BVC	Both	Mat=-10	Pht=-15	Yld=060	Gpc=10	w(-10,-15,60,10)	GPC=0	-0.387148	-8.56642	0.305582	4.35657e-16	150.703	0.881744	88.8355	77.1175	5.0225	15.3225	-1024.17
BVC	Both	Mat=-10	Pht=-15	Yld=060	Gpc=20	w(-10,-15,60,20)	GPC=0	-0.387148	-8.56642	0.305582	1.45219e-16	150.703	0.919506	88.8355	77.1175	5.0225	15.3225	-1024.17
BVC	Both	Mat=-10	Pht=-15	Yld=060	Gpc=30	w(-10,-15,60,30)	GPC=0	-0.387148	-8.56642	0.305582	-1.45219e-16	150.703	0.946192	88.8355	77.1175	5.0225	15.3225	-1024.17
BVC	Both	Mat=-10	Pht=-15	Yld=060	Gpc=40	w(-10,-15,60,40)	GPC=0	-0.387148	-8.56642	0.305582	1.45219e-16	150.703	0.958311	88.8355	77.1175	5.0225	15.3225	-1024.17
BVC	Both	Mat=-10	Pht=-15	Yld=060	Gpc=50	w(-10,-15,60,50)	GPC=0	-0.387148	-8.56642	0.305582	-2.90438e-16	150.703	0.954102	88.8355	77.1175	5.0225	15.3225	-1024.17
BVC	Both	Mat=-10	Pht=-15	Yld=060	Gpc=60	w(-10,-15,60,60)	GPC=0	-0.387148	-8.56642	0.305582	4.35657e-16	150.703	0.934189	88.8355	77.1175	5.0225	15.3225	-1024.17
BVC	Both	Mat=-10	Pht=-15	Yld=060	Gpc=70	w(-10,-15,60,70)	GPC=0	-0.387148	-8.56642	0.305582	1.63371e-16	150.703	0.901344	88.8355	77.1175	5.0225	15.3225	-1024.17
BVC	Both	Mat=-10	Pht=-15	Yld=060	Gpc=80	w(-10,-15,60,80)	GPC=0	-0.387148	-8.56642	0.305582	1.81524e-17	150.703	0.859511	88.8355	77.1175	5.0225	15.3225	-1024.17
BVC	Both	Mat=-10	Pht=-15	Yld=070	Gpc=01	w(-10,-15,70,1)	GPC=0	-0.315851	-8.52269	0.326661	2.31131e-16	153.865	0.833523	88.8355	77.1175	5.0225	15.3225	-940.879
BVC	Both	Mat=-10	Pht=-15	Yld=070	Gpc=10	w(-10,-15,70,10)	GPC=0	-0.315851	-8.52269	0.326661	3.20027e-16	153.865	0.873487	88.8355	77.1175	5.0225	15.3225	-940.879
BVC	Both	Mat=-10	Pht=-15	Yld=070	Gpc=20	w(-10,-15,70,20)	GPC=0	-0.315851	-8.52269	0.326661	-1.42234e-16	153.865	0.912104	88.8355	77.1175	5.0225	15.3225	-940.879
BVC	Both	Mat=-10	Pht=-15	Yld=070	Gpc=30	w(-10,-15,70,30)	GPC=0	-0.315851	-8.52269	0.326661	3.55586e-17	153.865	0.940907	88.8355	77.1175	5.0225	15.3225	-940.879
BVC	Both	Mat=-10	Pht=-15	Yld=070	Gpc=40	w(-10,-15,70,40)	GPC=0	-0.315851	-8.52269	0.326661	1.60014e-16	153.865	0.956399	88.8355	77.1175	5.0225	15.3225	-940.879
BVC	Both	Mat=-10	Pht=-15	Yld=070	Gpc=50	w(-10,-15,70,50)	GPC=0	-0.315851	-8.52269	0.326661	1.42234e-16	153.865	0.956456	88.8355	77.1175	5.0225	15.3225	-940.879
BVC	Both	Mat=-10	Pht=-15	Yld=070	Gpc=60	w(-10,-15,70,60)	GPC=0	-0.315851	-8.52269	0.326661	-2.31131e-16	153.865	0.94107	88.8355	77.1175	5.0225	15.3225	-940.879
BVC	Both	Mat=-10	Pht=-15	Yld=070	Gpc=70	w(-10,-15,70,70)	GPC=0	-0.315851	-8.52269	0.326661	1.42234e-16	153.865	0.912351	88.8355	77.1175	5.0225	15.3225	-940.879
BVC	Both	Mat=-10	Pht=-15	Yld=070	Gpc=80	w(-10,-15,70,80)	GPC=0	-0.315851	-8.52269	0.326661	-1.42234e-16	153.865	0.873791	88.8355	77.1175	5.0225	15.3225	-940.879
BVC	Both	Mat=-10	Pht=-15	Yld=080	Gpc=01	w(-10,-15,80,1)	GPC=0	-0.247103	-8.46969	0.34644	0	157.232	0.825861	88.8355	77.1175	5.0225	15.3225	-857.583
BVC	Both	Mat=-10	Pht=-15	Yld=080	Gpc=10	w(-10,-15,80,10)	GPC=0	-0.247103	-8.46969	0.34644	1.2179e-16	157.232	0.86553	88.8355	77.1175	5.0225	15.3225	-857.583
BVC	Both	Mat=-10	Pht=-15	Yld=080	Gpc=20	w(-10,-15,80,20)	GPC=0	-0.247103	-8.46969	0.34644	1.91385e-16	157.232	0.904668	88.8355	77.1175	5.0225	15.3225	-857.583
BVC	Both	Mat=-10	Pht=-15	Yld=080	Gpc=30	w(-10,-15,80,30)	GPC=0	-0.247103	-8.46969	0.34644	0	157.232	0.935153	88.8355	77.1175	5.0225	15.3225	-857.583
BVC	Both	Mat=-10	Pht=-15	Yld=080	Gpc=40	w(-10,-15,80,40)	GPC=0	-0.247103	-8.46969	0.34644	-1.39189e-16	157.232	0.953564	88.8355	77.1175	5.0225	15.3225	-857.583
BVC	Both	Mat=-10	Pht=-15	Yld=080	Gpc=50	w(-10,-15,80,50)	GPC=0	-0.247103	-8.46969	0.34644	1.39189e-16	157.232	0.957532	88.8355	77.1175	5.0225	15.3225	-857.583
BVC	Both	Mat=-10	Pht=-15	Yld=080	Gpc=60	w(-10,-15,80,60)	GPC=0	-0.247103	-8.46969	0.34644	0	157.232	0.946514	88.8355	77.1175	5.0225	15.3225	-857.583
BVC	Both	Mat=-10	Pht=-15	Yld=080	Gpc=70	w(-10,-15,80,70)	GPC=0	-0.247103	-8.46969	0.34644	-1.39189e-16	157.232	0.921987	88.8355	77.1175	5.0225	15.3225	-857.583
BVC	Both	Mat=-10	Pht=-15	Yld=080	Gpc=80	w(-10,-15,80,80)	GPC=0	-0.247103	-8.46969	0.34644	-1.2179e-16	157.232	0.886938	88.8355	77.1175	5.0225	15.3225	-857.583
BVC	Both	Mat=-10	Pht=-15	Yld=090	Gpc=01	w(-10,-15,90,1)	GPC=0	-0.181022	-8.4089	0.364955	1.70136e-16	160.79	0.818702	88.8355	77.1175	5.0225	15.3225	-774.287
BVC	Both	Mat=-10	Pht=-15	Yld=090	Gpc=10	w(-10,-15,90,10)	GPC=0	-0.181022	-8.4089	0.364955	1.70136e-16	160.79	0.857921	88.8355	77.1175	5.0225	15.3225	-774.287
BVC	Both	Mat=-10	Pht=-15	Yld=090	Gpc=20	w(-10,-15,90,20)	GPC=0	-0.181022	-8.4089	0.364955	3.40272e-17	160.79	0.8973	88.8355	77.1175	5.0225	15.3225	-774.287
BVC	Both	Mat=-10	Pht=-15	Yld=090	Gpc=30	w(-10,-15,90,30)	GPC=0	-0.181022	-8.4089	0.364955	1.02082e-16	160.79	0.929079	88.8355	77.1175	5.0225	15.3225	-774.287
BVC	Both	Mat=-10	Pht=-15	Yld=090	Gpc=40	w(-10,-15,90,40)	GPC=0	-0.181022	-8.4089	0.364955	9.94084e-17	160.79	0.949971	88.8355	77.1175	5.0225	15.3225	-774.287
BVC	Both	Mat=-10	Pht=-15	Yld=090	Gpc=50	w(-10,-15,90,50)	GPC=0	-0.181022	-8.4089	0.364955	-6.80544e-17	160.79	0.957463	88.8355	77.1175	5.0225	15.3225	-774.287
BVC	Both	Mat=-10	Pht=-15	Yld=090	Gpc=60	w(-10,-15,90,60)	GPC=0	-0.181022	-8.4089	0.364955	1.36109e-16	160.79	0.950584	88.8355	77.1175	5.0225	15.3225	-774.287
BVC	Both	Mat=-10	Pht=-15	Yld=090	Gpc=70	w(-10,-15,90,70)	GPC=0	-0.181022	-8.4089	0.364955	4.08327e-16	160.79	0.930228	88.8355	77.1175	5.0225	15.3225	-774.287
BVC	Both	Mat=-10	Pht=-15	Yld=090	Gpc=80	w(-10,-15,90,80)	GPC=0	-0.181022	-8.4089	0.364955	6.80544e-17	160.79	0.898853	88.8355	77.1175	5.0225	15.3225	-774.287
BVC	Both	Mat=-10	Pht=-15	Yld=100	Gpc=01	w(-10,-15,100,1)	GPC=0	-0.117675	-8.34165	0.382251	2.66035e-16	164.527	0.812043	88.72	77.4825	5.0335	15.389	-690.909
BVC	Both	Mat=-10	Pht=-15	Yld=100	Gpc=10	w(-10,-15,100,10)	GPC=0	-0.117675	-8.34165	0.382251	2.99289e-16	164.527	0.850695	88.72	77.4825	5.0335	15.389	-690.909
BVC	Both	Mat=-10	Pht=-15	Yld=100	Gpc=20	w(-10,-15,100,20)	GPC=0	-0.117675	-8.34165	0.382251	0	164.527	0.890081	88.72	77.4825	5.0335	15.389	-690.909
BVC	Both	Mat=-10	Pht=-15	Yld=100	Gpc=30	w(-10,-15,100,30)	GPC=0	-0.117675	-8.34165	0.382251	0	164.527	0.922814	88.72	77.4825	5.0335	15.389	-690.909
BVC	Both	Mat=-10	Pht=-15	Yld=100	Gpc=40	w(-10,-15,100,40)	GPC=0	-0.117675	-8.34165	0.382251	1.66272e-16	164.527	0.945774	88.72	77.4825	5.0335	15.389	-690.909
BVC	Both	Mat=-10	Pht=-15	Yld=100	Gpc=50	w(-10,-15,100,50)	GPC=0	-0.117675	-8.34165	0.382251	-1.33017e-16	164.527	0.956394	88.72	77.4825	5.0335	15.389	-690.909
BVC	Both	Mat=-10	Pht=-15	Yld=100	Gpc=60	w(-10,-15,100,60)	GPC=0	-0.117675	-8.34165	0.382251	1.33017e-16	164.527	0.953373	88.72	77.4825	5.0335	15.389	-690.909
BVC	Both	Mat=-10	Pht=-15	Yld=100	Gpc=70	w(-10,-15,100,70)	GPC=0	-0.117675	-8.34165	0.382251	-2.66035e-16	164.527	0.937087	88.72	77.4825	5.0335	15.389	-690.909
BVC	Both	Mat=-10	Pht=-15	Yld=100	Gpc=80	w(-10,-15,100,80)	GPC=0	-0.117675	-8.34165	0.382251	6.65087e-17	164.527	0.909472	88.72	77.4825	5.0335	15.389	-690.909
BVC	Both	Mat=-10	Pht=-15	Yld=110	Gpc=01	w(-10,-15,110,1)	GPC=0	-0.057084	-8.26918	0.398384	2.59868e-16	168.431	0.805871	88.72	77.4825	5.0335	15.389	-607.38
BVC	Both	Mat=-10	Pht=-15	Yld=110	Gpc=10	w(-10,-15,110,10)	GPC=0	-0.057084	-8.26918	0.398384	0	168.431	0.843866	88.72	77.4825	5.0335	15.389	-607.38
BVC	Both	Mat=-10	Pht=-15	Yld=110	Gpc=20	w(-10,-15,110,20)	GPC=0	-0.057084	-8.26918	0.398384	0	168.431	0.883073	88.72	77.4825	5.0335	15.389	-607.38
BVC	Both	Mat=-10	Pht=-15	Yld=110	Gpc=30	w(-10,-15,110,30)	GPC=0	-0.057084	-8.26918	0.398384	6.4967e-17	168.431	0.916464	88.72	77.4825	5.0335	15.389	-607.38
BVC	Both	Mat=-10	Pht=-15	Yld=110	Gpc=40	w(-10,-15,110,40)	GPC=0	-0.057084	-8.26918	0.398384	-1.05828e-16	168.431	0.941116	88.72	77.4825	5.0335	15.389	-607.38
BVC	Both	Mat=-10	Pht=-15	Yld=110	Gpc=50	w(-10,-15,110,50)	GPC=0	-0.057084	-8.26918	0.398384	5.19736e-16	168.431	0.954472	88.72	77.4825	5.0335	15.389	-607.38
BVC	Both	Mat=-10	Pht=-15	Yld=110	Gpc=60	w(-10,-15,110,60)	GPC=0	-0.057084	-8.26918	0.398384	2.59868e-16	168.431	0.954992	88.72	77.4825	5.0335	15.389	-607.38
BVC	Both	Mat=-10	Pht=-15	Yld=110	Gpc=70	w(-10,-15,110,70)	GPC=0	-0.057084	-8.26918	0.398384	5.19736e-16	168.431	0.942613	88.72	77.4825	5.0335	15.389	-607.38
BVC	Both	Mat=-10	Pht=-15	Yld=110	Gpc=80	w(-10,-15,110,80)	GPC=0	-0.057084	-8.26918	0.398384	6.4967e-17	168.431	0.918771	88.72	77.4825	5.0335	15.389	-607.38
BVC	Both	Mat=-10	Pht=-15	Yld=120	Gpc=01	w(-10,-15,120,1)	GPC=0	0.000760757	-8.19259	0.413412	-2.53752e-16	172.491	0.800167	88.529	77.899	5.0335	15.471	-523.687
BVC	Both	Mat=-10	Pht=-15	Yld=120	Gpc=10	w(-10,-15,120,10)	GPC=0	0.000760757	-8.19259	0.413412	2.53752e-16	172.491	0.837441	88.529	77.899	5.0335	15.471	-523.687
BVC	Both	Mat=-10	Pht=-15	Yld=120	Gpc=20	w(-10,-15,120,20)	GPC=0	0.000760757	-8.19259	0.413412	2.53752e-16	172.491	0.876317	88.529	77.899	5.0335	15.471	-523.687
BVC	Both	Mat=-10	Pht=-15	Yld=120	Gpc=30	w(-10,-15,120,30)	GPC=0	0.000760757	-8.19259	0.413412	3.1719e-16	172.491	0.910117	88.529	77.899	5.0335	15.471	-523.687
BVC	Both	Mat=-10	Pht=-15	Yld=120	Gpc=40	w(-10,-15,120,40)	GPC=0	0.000760757	-8.19259	0.413412	6.34379e-17	172.491	0.936124	88.529	77.899	5.0335	15.471	-523.687
BVC	Both	Mat=-10	Pht=-15	Yld=120	Gpc=50	w(-10,-15,120,50)	GPC=0	0.000760757	-8.19259	0.413412	-2.53752e-16	172.491	0.95184	88.529	77.899	5.0335	15.471	-523.687
BVC	Both	Mat=-10	Pht=-15	Yld=120	Gpc=60	w(-10,-15,120,60)	GPC=0	0.000760757	-8.19259	0.413412	6.34379e-17	172.491	0.955567	88.529	77.899	5.0335	15.471	-523.687
BVC	Both	Mat=-10	Pht=-15	Yld=120	Gpc=70	w(-10,-15,120,70)	GPC=0	0.000760757	-8.19259	0.413412	6.34379e-17	172.491	0.94688	88.529	77.899	5.0335	15.471	-523.687
BVC	Both	Mat=-10	Pht=-15	Yld=120	Gpc=80	w(-10,-15,120,80)	GPC=0	0.000760757	-8.19259	0.413412	1.90314e-16	172.491	0.926756	88.529	77.899	5.0335	15.471	-523.687
BVC	Both	Mat=-10	Pht=-15	Yld=130	Gpc=01	w(-10,-15,130,1)	GPC=0	0.0558992	-8.11285	0.427398	3.09641e-16	176.696	0.794906	88.529	77.899	5.0335	15.471	-439.989
BVC	Both	Mat=-10	Pht=-15	Yld=130	Gpc=10	w(-10,-15,130,10)	GPC=0	0.0558992	-8.11285	0.427398	0	176.696	0.831416	88.529	77.899	5.0335	15.471	-439.989
BVC	Both	Mat=-10	Pht=-15	Yld=130	Gpc=20	w(-10,-15,130,20)	GPC=0	0.0558992	-8.11285	0.427398	1.23857e-16	176.696	0.869843	88.529	77.899	5.0335	15.471	-439.989
BVC	Both	Mat=-10	Pht=-15	Yld=130	Gpc=30	w(-10,-15,130,30)	GPC=0	0.0558992	-8.11285	0.427398	0	176.696	0.903843	88.529	77.899	5.0335	15.471	-439.989
BVC	Both	Mat=-10	Pht=-15	Yld=130	Gpc=40	w(-10,-15,130,40)	GPC=0	0.0558992	-8.11285	0.427398	0	176.696	0.930908	88.529	77.899	5.0335	15.471	-439.989
BVC	Both	Mat=-10	Pht=-15	Yld=130	Gpc=50	w(-10,-15,130,50)	GPC=0	0.0558992	-8.11285	0.427398	0	176.696	0.948631	88.529	77.899	5.0335	15.471	-439.989
BVC	Both	Mat=-10	Pht=-15	Yld=130	Gpc=60	w(-10,-15,130,60)	GPC=0	0.0558992	-8.11285	0.427398	2.47713e-16	176.696	0.955226	88.529	77.899	5.0335	15.471	-439.989
BVC	Both	Mat=-10	Pht=-15	Yld=130	Gpc=70	w(-10,-15,130,70)	GPC=0	0.0558992	-8.11285	0.427398	0	176.696	0.949981	88.529	77.899	5.0335	15.471	-439.989
BVC	Both	Mat=-10	Pht=-15	Yld=130	Gpc=80	w(-10,-15,130,80)	GPC=0	0.0558992	-8.11285	0.427398	-1.23857e-16	176.696	0.933465	88.529	77.899	5.0335	15.471	-439.989
BVC	Both	Mat=-10	Pht=-15	Yld=140	Gpc=01	w(-10,-15,140,1)	GPC=0	0.108394	-8.03084	0.440405	3.62662e-16	181.035	0.790063	88.529	77.899	5.0335	15.471	-356.29
BVC	Both	Mat=-10	Pht=-15	Yld=140	Gpc=10	w(-10,-15,140,10)	GPC=0	0.108394	-8.03084	0.440405	3.02219e-16	181.035	0.825781	88.529	77.899	5.0335	15.471	-356.29
BVC	Both	Mat=-10	Pht=-15	Yld=140	Gpc=20	w(-10,-15,140,20)	GPC=0	0.108394	-8.03084	0.440405	2.41775e-16	181.035	0.863667	88.529	77.899	5.0335	15.471	-356.29
BVC	Both	Mat=-10	Pht=-15	Yld=140	Gpc=30	w(-10,-15,140,30)	GPC=0	0.108394	-8.03084	0.440405	1.81331e-16	181.035	0.897696	88.529	77.899	5.0335	15.471	-356.29
BVC	Both	Mat=-10	Pht=-15	Yld=140	Gpc=40	w(-10,-15,140,40)	GPC=0	0.108394	-8.03084	0.440405	1.20887e-16	181.035	0.925558	88.529	77.899	5.0335	15.471	-356.29
BVC	Both	Mat=-10	Pht=-15	Yld=140	Gpc=50	w(-10,-15,140,50)	GPC=0	0.108394	-8.03084	0.440405	0	181.035	0.944967	88.529	77.899	5.0335	15.471	-356.29
BVC	Both	Mat=-10	Pht=-15	Yld=140	Gpc=60	w(-10,-15,140,60)	GPC=0	0.108394	-8.03084	0.440405	-2.62712e-18	181.035	0.954098	88.529	77.899	5.0335	15.471	-356.29
BVC	Both	Mat=-10	Pht=-15	Yld=140	Gpc=70	w(-10,-15,140,70)	GPC=0	0.108394	-8.03084	0.440405	2.41775e-16	181.035	0.952023	88.529	77.899	5.0335	15.471	-356.29
BVC	Both	Mat=-10	Pht=-15	Yld=140	Gpc=80	w(-10,-15,140,80)	GPC=0	0.108394	-8.03084	0.440405	2.41775e-16	181.035	0.938958	88.529	77.899	5.0335	15.471	-356.29
BVC	Both	Mat=-10	Pht=-15	Yld=150	Gpc=01	w(-10,-15,150,1)	GPC=0	0.158323	-7.94728	0.452497	2.35955e-16	185.501	0.78561	88.529	77.899	5.0335	15.471	-272.592
BVC	Both	Mat=-10	Pht=-15	Yld=150	Gpc=10	w(-10,-15,150,10)	GPC=0	0.158323	-7.94728	0.452497	1.17977e-16	185.501	0.82052	88.529	77.899	5.0335	15.471	-272.592
BVC	Both	Mat=-10	Pht=-15	Yld=150	Gpc=20	w(-10,-15,150,20)	GPC=0	0.158323	-7.94728	0.452497	1.76966e-16	185.501	0.8578	88.529	77.899	5.0335	15.471	-272.592
BVC	Both	Mat=-10	Pht=-15	Yld=150	Gpc=30	w(-10,-15,150,30)	GPC=0	0.158323	-7.94728	0.452497	0	185.501	0.891715	88.529	77.899	5.0335	15.471	-272.592
BVC	Both	Mat=-10	Pht=-15	Yld=150	Gpc=40	w(-10,-15,150,40)	GPC=0	0.158323	-7.94728	0.452497	0	185.501	0.920152	88.529	77.899	5.0335	15.471	-272.592
BVC	Both	Mat=-10	Pht=-15	Yld=150	Gpc=50	w(-10,-15,150,50)	GPC=0	0.158323	-7.94728	0.452497	2.35955e-16	185.501	0.940954	88.529	77.899	5.0335	15.471	-272.592
BVC	Both	Mat=-10	Pht=-15	Yld=150	Gpc=60	w(-10,-15,150,60)	GPC=0	0.158323	-7.94728	0.452497	0	185.501	0.952305	88.529	77.899	5.0335	15.471	-272.592
BVC	Both	Mat=-10	Pht=-15	Yld=150	Gpc=70	w(-10,-15,150,70)	GPC=0	0.158323	-7.94728	0.452497	0	185.501	0.953118	88.529	77.899	5.0335	15.471	-272.592
BVC	Both	Mat=-10	Pht=-15	Yld=150	Gpc=80	w(-10,-15,150,80)	GPC=0	0.158323	-7.94728	0.452497	-1.76966e-16	185.501	0.943312	88.529	77.899	5.0335	15.471	-272.592
BVC	Both	Mat=-15	Pht=-01	Yld=001	Gpc=01	w(-15,-1,1,1)	GPC=0	-4.0098	-0.56784	-0.200977	0	60.5138	0.815411	84.3055	85.0515	4.5125	14.6725	-1490.39
BVC	Both	Mat=-15	Pht=-01	Yld=001	Gpc=10	w(-15,-1,1,10)	GPC=0	-4.0098	-0.56784	-0.200977	0	60.5138	0.707929	84.3055	85.0515	4.5125	14.6725	-1490.39
BVC	Both	Mat=-15	Pht=-01	Yld=001	Gpc=20	w(-15,-1,1,20)	GPC=0	-4.0098	-0.56784	-0.200977	3.61651e-16	60.5138	0.601554	84.3055	85.0515	4.5125	14.6725	-1490.39
BVC	Both	Mat=-15	Pht=-01	Yld=001	Gpc=30	w(-15,-1,1,30)	GPC=0	-4.0098	-0.56784	-0.200977	-1.80826e-16	60.5138	0.515344	84.3055	85.0515	4.5125	14.6725	-1490.39
BVC	Both	Mat=-15	Pht=-01	Yld=001	Gpc=40	w(-15,-1,1,40)	GPC=0	-4.0098	-0.56784	-0.200977	-1.80826e-16	60.5138	0.447165	84.3055	85.0515	4.5125	14.6725	-1490.39
BVC	Both	Mat=-15	Pht=-01	Yld=001	Gpc=50	w(-15,-1,1,50)	GPC=0	-4.0098	-0.56784	-0.200977	-3.61651e-16	60.5138	0.393121	84.3055	85.0515	4.5125	14.6725	-1490.39
BVC	Both	Mat=-15	Pht=-01	Yld=001	Gpc=60	w(-15,-1,1,60)	GPC=0	-4.0098	-0.56784	-0.200977	-3.61651e-16	60.5138	0.349769	84.3055	85.0515	4.5125	14.6725	-1490.39
BVC	Both	Mat=-15	Pht=-01	Yld=001	Gpc=70	w(-15,-1,1,70)	GPC=0	-4.0098	-0.56784	-0.200977	-1.80826e-16	60.5138	0.314483	84.3055	85.0515	4.5125	14.6725	-1490.39
BVC	Both	Mat=-15	Pht=-01	Yld=001	Gpc=80	w(-15,-1,1,80)	GPC=0	-4.0098	-0.56784	-0.200977	-7.23302e-16	60.5138	0.285338	84.3055	85.0515	4.5125	14.6725	-1490.39
BVC	Both	Mat=-15	Pht=-01	Yld=010	Gpc=01	w(-15,-1,10,1)	GPC=0	-3.96623	-0.89349	-0.141999	-1.85569e-16	58.967	0.836057	84.3175	84.8775	4.6065	14.692	-1420.88
BVC	Both	Mat=-15	Pht=-01	Yld=010	Gpc=10	w(-15,-1,10,10)	GPC=0	-3.96623	-0.89349	-0.141999	0	58.967	0.726155	84.3175	84.8775	4.6065	14.692	-1420.88
BVC	Both	Mat=-15	Pht=-01	Yld=010	Gpc=20	w(-15,-1,10,20)	GPC=0	-3.96623	-0.89349	-0.141999	-1.85569e-16	58.967	0.614531	84.3175	84.8775	4.6065	14.692	-1420.88
BVC	Both	Mat=-15	Pht=-01	Yld=010	Gpc=30	w(-15,-1,10,30)	GPC=0	-3.96623	-0.89349	-0.141999	-3.71138e-16	58.967	0.52373	84.3175	84.8775	4.6065	14.692	-1420.88
BVC	Both	Mat=-15	Pht=-01	Yld=010	Gpc=40	w(-15,-1,10,40)	GPC=0	-3.96623	-0.89349	-0.141999	-1.85569e-16	58.967	0.452227	84.3175	84.8775	4.6065	14.692	-1420.88
BVC	Both	Mat=-15	Pht=-01	Yld=010	Gpc=50	w(-15,-1,10,50)	GPC=0	-3.96623	-0.89349	-0.141999	1.85569e-16	58.967	0.395903	84.3175	84.8775	4.6065	14.692	-1420.88
BVC	Both	Mat=-15	Pht=-01	Yld=010	Gpc=60	w(-15,-1,10,60)	GPC=0	-3.96623	-0.89349	-0.141999	-7.42276e-16	58.967	0.351006	84.3175	84.8775	4.6065	14.692	-1420.88
BVC	Both	Mat=-15	Pht=-01	Yld=010	Gpc=70	w(-15,-1,10,70)	GPC=0	-3.96623	-0.89349	-0.141999	-9.27845e-16	58.967	0.314669	84.3175	84.8775	4.6065	14.692	-1420.88
BVC	Both	Mat=-15	Pht=-01	Yld=010	Gpc=80	w(-15,-1,10,80)	GPC=0	-3.96623	-0.89349	-0.141999	-1.85569e-16	58.967	0.284805	84.3175	84.8775	4.6065	14.692	-1420.88
BVC	Both	Mat=-15	Pht=-01	Yld=020	Gpc=01	w(-15,-1,20,1)	GPC=0	-3.87139	-1.26173	-0.0719183	-5.67023e-16	57.8942	0.860318	84.3985	84.83	4.642	14.643	-1343.05
BVC	Both	Mat=-15	Pht=-01	Yld=020	Gpc=10	w(-15,-1,20,10)	GPC=0	-3.87139	-1.26173	-0.0719183	0	57.8942	0.750634	84.3985	84.83	4.642	14.643	-1343.05
BVC	Both	Mat=-15	Pht=-01	Yld=020	Gpc=20	w(-15,-1,20,20)	GPC=0	-3.87139	-1.26173	-0.0719183	-3.78015e-16	57.8942	0.633949	84.3985	84.83	4.642	14.643	-1343.05
BVC	Both	Mat=-15	Pht=-01	Yld=020	Gpc=30	w(-15,-1,20,30)	GPC=0	-3.87139	-1.26173	-0.0719183	-3.78015e-16	57.8942	0.537824	84.3985	84.83	4.642	14.643	-1343.05
BVC	Both	Mat=-15	Pht=-01	Yld=020	Gpc=40	w(-15,-1,20,40)	GPC=0	-3.87139	-1.26173	-0.0719183	0	57.8942	0.462174	84.3985	84.83	4.642	14.643	-1343.05
BVC	Both	Mat=-15	Pht=-01	Yld=020	Gpc=50	w(-15,-1,20,50)	GPC=0	-3.87139	-1.26173	-0.0719183	0	57.8942	0.402866	84.3985	84.83	4.642	14.643	-1343.05
BVC	Both	Mat=-15	Pht=-01	Yld=020	Gpc=60	w(-15,-1,20,60)	GPC=0	-3.87139	-1.26173	-0.0719183	1.89008e-16	57.8942	0.355858	84.3985	84.83	4.642	14.643	-1343.05
BVC	Both	Mat=-15	Pht=-01	Yld=020	Gpc=70	w(-15,-1,20,70)	GPC=0	-3.87139	-1.26173	-0.0719183	0	57.8942	0.318022	84.3985	84.83	4.642	14.643	-1343.05
BVC	Both	Mat=-15	Pht=-01	Yld=020	Gpc=80	w(-15,-1,20,80)	GPC=0	-3.87139	-1.26173	-0.0719183	-3.78015e-16	57.8942	0.28708	84.3985	84.83	4.642	14.643	-1343.05
BVC	Both	Mat=-15	Pht=-01	Yld=030	Gpc=01	w(-15,-1,30,1)	GPC=0	-3.72601	-1.62341	0.000798608	-2.85269e-16	57.5375	0.883991	84.241	85.736	4.667	14.7865	-1264.81
BVC	Both	Mat=-15	Pht=-01	Yld=030	Gpc=10	w(-15,-1,30,10)	GPC=0	-3.72601	-1.62341	0.000798608	-3.80359e-16	57.5375	0.778885	84.241	85.736	4.667	14.7865	-1264.81
BVC	Both	Mat=-15	Pht=-01	Yld=030	Gpc=20	w(-15,-1,30,20)	GPC=0	-3.72601	-1.62341	0.000798608	-1.9018e-16	57.5375	0.658849	84.241	85.736	4.667	14.7865	-1264.81
BVC	Both	Mat=-15	Pht=-01	Yld=030	Gpc=30	w(-15,-1,30,30)	GPC=0	-3.72601	-1.62341	0.000798608	-3.80359e-16	57.5375	0.557477	84.241	85.736	4.667	14.7865	-1264.81
BVC	Both	Mat=-15	Pht=-01	Yld=030	Gpc=40	w(-15,-1,30,40)	GPC=0	-3.72601	-1.62341	0.000798608	-3.80359e-16	57.5375	0.477256	84.241	85.736	4.667	14.7865	-1264.81
BVC	Both	Mat=-15	Pht=-01	Yld=030	Gpc=50	w(-15,-1,30,50)	GPC=0	-3.72601	-1.62341	0.000798608	-9.50898e-17	57.5375	0.414456	84.241	85.736	4.667	14.7865	-1264.81
BVC	Both	Mat=-15	Pht=-01	Yld=030	Gpc=60	w(-15,-1,30,60)	GPC=0	-3.72601	-1.62341	0.000798608	-5.70539e-16	57.5375	0.364868	84.241	85.736	4.667	14.7865	-1264.81
BVC	Both	Mat=-15	Pht=-01	Yld=030	Gpc=70	w(-15,-1,30,70)	GPC=0	-3.72601	-1.62341	0.000798608	-5.70539e-16	57.5375	0.325127	84.241	85.736	4.667	14.7865	-1264.81
BVC	Both	Mat=-15	Pht=-01	Yld=030	Gpc=80	w(-15,-1,30,80)	GPC=0	-3.72601	-1.62341	0.000798608	-5.70539e-16	57.5375	0.292762	84.241	85.736	4.667	14.7865	-1264.81
BVC	Both	Mat=-15	Pht=-01	Yld=040	Gpc=01	w(-15,-1,40,1)	GPC=0	-3.53374	-1.96455	0.0734855	-9.4478e-17	57.9101	0.904569	84.5405	84.473	4.736	14.7145	-1186.21
BVC	Both	Mat=-15	Pht=-01	Yld=040	Gpc=10	w(-15,-1,40,10)	GPC=0	-3.53374	-1.96455	0.0734855	-9.4478e-17	57.9101	0.809362	84.5405	84.473	4.736	14.7145	-1186.21
BVC	Both	Mat=-15	Pht=-01	Yld=040	Gpc=20	w(-15,-1,40,20)	GPC=0	-3.53374	-1.96455	0.0734855	-1.88956e-16	57.9101	0.688857	84.5405	84.473	4.736	14.7145	-1186.21
BVC	Both	Mat=-15	Pht=-01	Yld=040	Gpc=30	w(-15,-1,40,30)	GPC=0	-3.53374	-1.96455	0.0734855	2.3589e-16	57.9101	0.582864	84.5405	84.473	4.736	14.7145	-1186.21
BVC	Both	Mat=-15	Pht=-01	Yld=040	Gpc=40	w(-15,-1,40,40)	GPC=0	-3.53374	-1.96455	0.0734855	0	57.9101	0.497828	84.5405	84.473	4.736	14.7145	-1186.21
BVC	Both	Mat=-15	Pht=-01	Yld=040	Gpc=50	w(-15,-1,40,50)	GPC=0	-3.53374	-1.96455	0.0734855	-7.63597e-17	57.9101	0.43106	84.5405	84.473	4.736	14.7145	-1186.21
BVC	Both	Mat=-15	Pht=-01	Yld=040	Gpc=60	w(-15,-1,40,60)	GPC=0	-3.53374	-1.96455	0.0734855	9.4478e-17	57.9101	0.378401	84.5405	84.473	4.736	14.7145	-1186.21
BVC	Both	Mat=-15	Pht=-01	Yld=040	Gpc=70	w(-15,-1,40,70)	GPC=0	-3.53374	-1.96455	0.0734855	-5.66868e-16	57.9101	0.336312	84.5405	84.473	4.736	14.7145	-1186.21
BVC	Both	Mat=-15	Pht=-01	Yld=040	Gpc=80	w(-15,-1,40,80)	GPC=0	-3.53374	-1.96455	0.0734855	-4.7239e-16	57.9101	0.302143	84.5405	84.473	4.736	14.7145	-1186.21
BVC	Both	Mat=-15	Pht=-01	Yld=050	Gpc=01	w(-15,-1,50,1)	GPC=0	-3.30338	-2.27342	0.143482	3.70942e-16	58.9981	0.91977	84.9565	83.562	4.873	14.792	-1106.7
BVC	Both	Mat=-15	Pht=-01	Yld=050	Gpc=10	w(-15,-1,50,10)	GPC=0	-3.30338	-2.27342	0.143482	1.39103e-16	58.9981	0.839763	84.9565	83.562	4.873	14.792	-1106.7
BVC	Both	Mat=-15	Pht=-01	Yld=050	Gpc=20	w(-15,-1,50,20)	GPC=0	-3.30338	-2.27342	0.143482	-2.31839e-16	58.9981	0.722835	84.9565	83.562	4.873	14.792	-1106.7
BVC	Both	Mat=-15	Pht=-01	Yld=050	Gpc=30	w(-15,-1,50,30)	GPC=0	-3.30338	-2.27342	0.143482	-9.27355e-17	58.9981	0.613626	84.9565	83.562	4.873	14.792	-1106.7
BVC	Both	Mat=-15	Pht=-01	Yld=050	Gpc=40	w(-15,-1,50,40)	GPC=0	-3.30338	-2.27342	0.143482	-4.63678e-17	58.9981	0.52388	84.9565	83.562	4.873	14.792	-1106.7
BVC	Both	Mat=-15	Pht=-01	Yld=050	Gpc=50	w(-15,-1,50,50)	GPC=0	-3.30338	-2.27342	0.143482	0	58.9981	0.452794	84.9565	83.562	4.873	14.792	-1106.7
BVC	Both	Mat=-15	Pht=-01	Yld=050	Gpc=60	w(-15,-1,50,60)	GPC=0	-3.30338	-2.27342	0.143482	9.27355e-17	58.9981	0.396608	84.9565	83.562	4.873	14.792	-1106.7
BVC	Both	Mat=-15	Pht=-01	Yld=050	Gpc=70	w(-15,-1,50,70)	GPC=0	-3.30338	-2.27342	0.143482	-5.56413e-16	58.9981	0.351729	84.9565	83.562	4.873	14.792	-1106.7
BVC	Both	Mat=-15	Pht=-01	Yld=050	Gpc=80	w(-15,-1,50,80)	GPC=0	-3.30338	-2.27342	0.143482	-8.3462e-16	58.9981	0.315361	84.9565	83.562	4.873	14.792	-1106.7
BVC	Both	Mat=-15	Pht=-01	Yld=060	Gpc=01	w(-15,-1,60,1)	GPC=0	-3.04702	-2.54245	0.208592	1.80083e-16	60.7633	0.928303	85.036	83.698	4.9035	14.851	-1026.26
BVC	Both	Mat=-15	Pht=-01	Yld=060	Gpc=10	w(-15,-1,60,10)	GPC=0	-3.04702	-2.54245	0.208592	-9.00416e-17	60.7633	0.86749	85.036	83.698	4.9035	14.851	-1026.26
BVC	Both	Mat=-15	Pht=-01	Yld=060	Gpc=20	w(-15,-1,60,20)	GPC=0	-3.04702	-2.54245	0.208592	-3.15145e-16	60.7633	0.758914	85.036	83.698	4.9035	14.851	-1026.26
BVC	Both	Mat=-15	Pht=-01	Yld=060	Gpc=30	w(-15,-1,60,30)	GPC=0	-3.04702	-2.54245	0.208592	-4.27697e-16	60.7633	0.648805	85.036	83.698	4.9035	14.851	-1026.26
BVC	Both	Mat=-15	Pht=-01	Yld=060	Gpc=40	w(-15,-1,60,40)	GPC=0	-3.04702	-2.54245	0.208592	-2.25104e-17	60.7633	0.554971	85.036	83.698	4.9035	14.851	-1026.26
BVC	Both	Mat=-15	Pht=-01	Yld=060	Gpc=50	w(-15,-1,60,50)	GPC=0	-3.04702	-2.54245	0.208592	-4.50208e-16	60.7633	0.479464	85.036	83.698	4.9035	14.851	-1026.26
BVC	Both	Mat=-15	Pht=-01	Yld=060	Gpc=60	w(-15,-1,60,60)	GPC=0	-3.04702	-2.54245	0.208592	6.75312e-17	60.7633	0.419405	85.036	83.698	4.9035	14.851	-1026.26
BVC	Both	Mat=-15	Pht=-01	Yld=060	Gpc=70	w(-15,-1,60,70)	GPC=0	-3.04702	-2.54245	0.208592	-8.10374e-16	60.7633	0.371339	85.036	83.698	4.9035	14.851	-1026.26
BVC	Both	Mat=-15	Pht=-01	Yld=060	Gpc=80	w(-15,-1,60,80)	GPC=0	-3.04702	-2.54245	0.208592	-4.50208e-16	60.7633	0.332395	85.036	83.698	4.9035	14.851	-1026.26
BVC	Both	Mat=-15	Pht=-01	Yld=070	Gpc=01	w(-15,-1,70,1)	GPC=0	-2.77759	-2.76883	0.267374	1.2996e-16	63.1488	0.930214	85.353	82.896	4.963	14.8805	-945.359
BVC	Both	Mat=-15	Pht=-01	Yld=070	Gpc=10	w(-15,-1,70,10)	GPC=0	-2.77759	-2.76883	0.267374	1.54328e-16	63.1488	0.890327	85.353	82.896	4.963	14.8805	-945.359
BVC	Both	Mat=-15	Pht=-01	Yld=070	Gpc=20	w(-15,-1,70,20)	GPC=0	-2.77759	-2.76883	0.267374	-2.3826e-16	63.1488	0.794765	85.353	82.896	4.963	14.8805	-945.359
BVC	Both	Mat=-15	Pht=-01	Yld=070	Gpc=30	w(-15,-1,70,30)	GPC=0	-2.77759	-2.76883	0.267374	-9.74702e-17	63.1488	0.686886	85.353	82.896	4.963	14.8805	-945.359
BVC	Both	Mat=-15	Pht=-01	Yld=070	Gpc=40	w(-15,-1,70,40)	GPC=0	-2.77759	-2.76883	0.267374	3.49268e-16	63.1488	0.590226	85.353	82.896	4.963	14.8805	-945.359
BVC	Both	Mat=-15	Pht=-01	Yld=070	Gpc=50	w(-15,-1,70,50)	GPC=0	-2.77759	-2.76883	0.267374	8.39327e-17	63.1488	0.510556	85.353	82.896	4.963	14.8805	-945.359
BVC	Both	Mat=-15	Pht=-01	Yld=070	Gpc=60	w(-15,-1,70,60)	GPC=0	-2.77759	-2.76883	0.267374	-4.76521e-16	63.1488	0.446465	85.353	82.896	4.963	14.8805	-945.359
BVC	Both	Mat=-15	Pht=-01	Yld=070	Gpc=70	w(-15,-1,70,70)	GPC=0	-2.77759	-2.76883	0.267374	3.16778e-16	63.1488	0.394915	85.353	82.896	4.963	14.8805	-945.359
BVC	Both	Mat=-15	Pht=-01	Yld=070	Gpc=80	w(-15,-1,70,80)	GPC=0	-2.77759	-2.76883	0.267374	-6.49801e-16	63.1488	0.35307	85.353	82.896	4.963	14.8805	-945.359
BVC	Both	Mat=-15	Pht=-01	Yld=080	Gpc=01	w(-15,-1,80,1)	GPC=0	-2.50661	-2.95379	0.319182	3.62196e-16	66.0875	0.926631	85.708	82.923	5.04	14.8425	-863.745
BVC	Both	Mat=-15	Pht=-01	Yld=080	Gpc=10	w(-15,-1,80,10)	GPC=0	-2.50661	-2.95379	0.319182	3.10453e-17	66.0875	0.906998	85.708	82.923	5.04	14.8425	-863.745
BVC	Both	Mat=-15	Pht=-01	Yld=080	Gpc=20	w(-15,-1,80,20)	GPC=0	-2.50661	-2.95379	0.319182	3.10453e-17	66.0875	0.828041	85.708	82.923	5.04	14.8425	-863.745
BVC	Both	Mat=-15	Pht=-01	Yld=080	Gpc=30	w(-15,-1,80,30)	GPC=0	-2.50661	-2.95379	0.319182	-1.03484e-16	66.0875	0.725976	85.708	82.923	5.04	14.8425	-863.745
BVC	Both	Mat=-15	Pht=-01	Yld=080	Gpc=40	w(-15,-1,80,40)	GPC=0	-2.50661	-2.95379	0.319182	-1.03484e-16	66.0875	0.628403	85.708	82.923	5.04	14.8425	-863.745
BVC	Both	Mat=-15	Pht=-01	Yld=080	Gpc=50	w(-15,-1,80,50)	GPC=0	-2.50661	-2.95379	0.319182	-1.86272e-16	66.0875	0.545272	85.708	82.923	5.04	14.8425	-863.745
BVC	Both	Mat=-15	Pht=-01	Yld=080	Gpc=60	w(-15,-1,80,60)	GPC=0	-2.50661	-2.95379	0.319182	-1.86272e-16	66.0875	0.477251	85.708	82.923	5.04	14.8425	-863.745
BVC	Both	Mat=-15	Pht=-01	Yld=080	Gpc=70	w(-15,-1,80,70)	GPC=0	-2.50661	-2.95379	0.319182	4.13938e-17	66.0875	0.422067	85.708	82.923	5.04	14.8425	-863.745
BVC	Both	Mat=-15	Pht=-01	Yld=080	Gpc=80	w(-15,-1,80,80)	GPC=0	-2.50661	-2.95379	0.319182	0	66.0875	0.377085	85.708	82.923	5.04	14.8425	-863.745
BVC	Both	Mat=-15	Pht=-01	Yld=090	Gpc=01	w(-15,-1,90,1)	GPC=0	-2.243	-3.1013	0.364032	1.86942e-16	69.5092	0.919174	85.81	82.732	5.0555	14.843	-781.742
BVC	Both	Mat=-15	Pht=-01	Yld=090	Gpc=10	w(-15,-1,90,10)	GPC=0	-2.243	-3.1013	0.364032	1.57424e-16	69.5092	0.917331	85.81	82.732	5.0555	14.843	-781.742
BVC	Both	Mat=-15	Pht=-01	Yld=090	Gpc=20	w(-15,-1,90,20)	GPC=0	-2.243	-3.1013	0.364032	-1.37746e-16	69.5092	0.85686	85.81	82.732	5.0555	14.843	-781.742
BVC	Both	Mat=-15	Pht=-01	Yld=090	Gpc=30	w(-15,-1,90,30)	GPC=0	-2.243	-3.1013	0.364032	-9.83903e-17	69.5092	0.764075	85.81	82.732	5.0555	14.843	-781.742
BVC	Both	Mat=-15	Pht=-01	Yld=090	Gpc=40	w(-15,-1,90,40)	GPC=0	-2.243	-3.1013	0.364032	-1.57424e-16	69.5092	0.668008	85.81	82.732	5.0555	14.843	-781.742
BVC	Both	Mat=-15	Pht=-01	Yld=090	Gpc=50	w(-15,-1,90,50)	GPC=0	-2.243	-3.1013	0.364032	-4.32917e-16	69.5092	0.582589	85.81	82.732	5.0555	14.843	-781.742
BVC	Both	Mat=-15	Pht=-01	Yld=090	Gpc=60	w(-15,-1,90,60)	GPC=0	-2.243	-3.1013	0.364032	-3.54205e-16	69.5092	0.511055	85.81	82.732	5.0555	14.843	-781.742
BVC	Both	Mat=-15	Pht=-01	Yld=090	Gpc=70	w(-15,-1,90,70)	GPC=0	-2.243	-3.1013	0.364032	3.5526e-16	69.5092	0.452282	85.81	82.732	5.0555	14.843	-781.742
BVC	Both	Mat=-15	Pht=-01	Yld=090	Gpc=80	w(-15,-1,90,80)	GPC=0	-2.243	-3.1013	0.364032	3.93561e-17	69.5092	0.404043	85.81	82.732	5.0555	14.843	-781.742
BVC	Both	Mat=-15	Pht=-01	Yld=100	Gpc=01	w(-15,-1,100,1)	GPC=0	-1.99278	-3.21664	0.40238	2.23783e-16	73.3464	0.909428	86.911	83.122	5.2575	14.71	-698.726
BVC	Both	Mat=-15	Pht=-01	Yld=100	Gpc=10	w(-15,-1,100,10)	GPC=0	-1.99278	-3.21664	0.40238	2.98377e-16	73.3464	0.922029	86.911	83.122	5.2575	14.71	-698.726
BVC	Both	Mat=-15	Pht=-01	Yld=100	Gpc=20	w(-15,-1,100,20)	GPC=0	-1.99278	-3.21664	0.40238	0	73.3464	0.880105	86.911	83.122	5.2575	14.71	-698.726
BVC	Both	Mat=-15	Pht=-01	Yld=100	Gpc=30	w(-15,-1,100,30)	GPC=0	-1.99278	-3.21664	0.40238	7.45943e-17	73.3464	0.799383	86.911	83.122	5.2575	14.71	-698.726
BVC	Both	Mat=-15	Pht=-01	Yld=100	Gpc=40	w(-15,-1,100,40)	GPC=0	-1.99278	-3.21664	0.40238	-7.45943e-17	73.3464	0.707465	86.911	83.122	5.2575	14.71	-698.726
BVC	Both	Mat=-15	Pht=-01	Yld=100	Gpc=50	w(-15,-1,100,50)	GPC=0	-1.99278	-3.21664	0.40238	7.45943e-17	73.3464	0.621346	86.911	83.122	5.2575	14.71	-698.726
BVC	Both	Mat=-15	Pht=-01	Yld=100	Gpc=60	w(-15,-1,100,60)	GPC=0	-1.99278	-3.21664	0.40238	7.45943e-17	73.3464	0.547046	86.911	83.122	5.2575	14.71	-698.726
BVC	Both	Mat=-15	Pht=-01	Yld=100	Gpc=70	w(-15,-1,100,70)	GPC=0	-1.99278	-3.21664	0.40238	-2.23783e-16	73.3464	0.48495	86.911	83.122	5.2575	14.71	-698.726
BVC	Both	Mat=-15	Pht=-01	Yld=100	Gpc=80	w(-15,-1,100,80)	GPC=0	-1.99278	-3.21664	0.40238	2.23783e-16	73.3464	0.43348	86.911	83.122	5.2575	14.71	-698.726
BVC	Both	Mat=-15	Pht=-01	Yld=110	Gpc=01	w(-15,-1,110,1)	GPC=0	-1.75938	-3.30536	0.434922	1.41125e-16	77.5374	0.898648	87.513	82.3235	5.3465	14.5835	-614.968
BVC	Both	Mat=-15	Pht=-01	Yld=110	Gpc=10	w(-15,-1,110,10)	GPC=0	-1.75938	-3.30536	0.434922	-7.05623e-17	77.5374	0.92225	87.513	82.3235	5.3465	14.5835	-614.968
BVC	Both	Mat=-15	Pht=-01	Yld=110	Gpc=20	w(-15,-1,110,20)	GPC=0	-1.75938	-3.30536	0.434922	0	77.5374	0.897485	87.513	82.3235	5.3465	14.5835	-614.968
BVC	Both	Mat=-15	Pht=-01	Yld=110	Gpc=30	w(-15,-1,110,30)	GPC=0	-1.75938	-3.30536	0.434922	-1.05844e-16	77.5374	0.830541	87.513	82.3235	5.3465	14.5835	-614.968
BVC	Both	Mat=-15	Pht=-01	Yld=110	Gpc=40	w(-15,-1,110,40)	GPC=0	-1.75938	-3.30536	0.434922	4.23374e-16	77.5374	0.745289	87.513	82.3235	5.3465	14.5835	-614.968
BVC	Both	Mat=-15	Pht=-01	Yld=110	Gpc=50	w(-15,-1,110,50)	GPC=0	-1.75938	-3.30536	0.434922	-7.05623e-17	77.5374	0.660333	87.513	82.3235	5.3465	14.5835	-614.968
BVC	Both	Mat=-15	Pht=-01	Yld=110	Gpc=60	w(-15,-1,110,60)	GPC=0	-1.75938	-3.30536	0.434922	2.82249e-16	77.5374	0.584322	87.513	82.3235	5.3465	14.5835	-614.968
BVC	Both	Mat=-15	Pht=-01	Yld=110	Gpc=70	w(-15,-1,110,70)	GPC=0	-1.75938	-3.30536	0.434922	1.41125e-16	77.5374	0.519404	87.513	82.3235	5.3465	14.5835	-614.968
BVC	Both	Mat=-15	Pht=-01	Yld=110	Gpc=80	w(-15,-1,110,80)	GPC=0	-1.75938	-3.30536	0.434922	0	77.5374	0.464888	87.513	82.3235	5.3465	14.5835	-614.968
BVC	Both	Mat=-15	Pht=-01	Yld=120	Gpc=01	w(-15,-1,120,1)	GPC=0	-1.54425	-3.37262	0.462431	6.66994e-17	82.0281	0.887703	87.585	82.388	5.355	14.6065	-530.792
BVC	Both	Mat=-15	Pht=-01	Yld=120	Gpc=10	w(-15,-1,120,10)	GPC=0	-1.54425	-3.37262	0.462431	2.66798e-16	82.0281	0.919235	87.585	82.388	5.355	14.6065	-530.792
BVC	Both	Mat=-15	Pht=-01	Yld=120	Gpc=20	w(-15,-1,120,20)	GPC=0	-1.54425	-3.37262	0.462431	1.33399e-16	82.0281	0.90937	87.585	82.388	5.355	14.6065	-530.792
BVC	Both	Mat=-15	Pht=-01	Yld=120	Gpc=30	w(-15,-1,120,30)	GPC=0	-1.54425	-3.37262	0.462431	1.33399e-16	82.0281	0.856759	87.585	82.388	5.355	14.6065	-530.792
BVC	Both	Mat=-15	Pht=-01	Yld=120	Gpc=40	w(-15,-1,120,40)	GPC=0	-1.54425	-3.37262	0.462431	0	82.0281	0.780237	87.585	82.388	5.355	14.6065	-530.792
BVC	Both	Mat=-15	Pht=-01	Yld=120	Gpc=50	w(-15,-1,120,50)	GPC=0	-1.54425	-3.37262	0.462431	-6.66994e-17	82.0281	0.69839	87.585	82.388	5.355	14.6065	-530.792
BVC	Both	Mat=-15	Pht=-01	Yld=120	Gpc=60	w(-15,-1,120,60)	GPC=0	-1.54425	-3.37262	0.462431	-2.66798e-16	82.0281	0.621961	87.585	82.388	5.355	14.6065	-530.792
BVC	Both	Mat=-15	Pht=-01	Yld=120	Gpc=70	w(-15,-1,120,70)	GPC=0	-1.54425	-3.37262	0.462431	-3.33497e-16	82.0281	0.554942	87.585	82.388	5.355	14.6065	-530.792
BVC	Both	Mat=-15	Pht=-01	Yld=120	Gpc=80	w(-15,-1,120,80)	GPC=0	-1.54425	-3.37262	0.462431	-4.66896e-16	82.0281	0.497734	87.585	82.388	5.355	14.6065	-530.792
BVC	Both	Mat=-15	Pht=-01	Yld=130	Gpc=01	w(-15,-1,130,1)	GPC=0	-1.34751	-3.42288	0.485664	1.26106e-16	86.7718	0.877124	87.8905	82.738	5.395	14.6285	-446.339
BVC	Both	Mat=-15	Pht=-01	Yld=130	Gpc=10	w(-15,-1,130,10)	GPC=0	-1.34751	-3.42288	0.485664	1.89159e-16	86.7718	0.914079	87.8905	82.738	5.395	14.6285	-446.339
BVC	Both	Mat=-15	Pht=-01	Yld=130	Gpc=20	w(-15,-1,130,20)	GPC=0	-1.34751	-3.42288	0.485664	1.26106e-16	86.7718	0.916526	87.8905	82.738	5.395	14.6285	-446.339
BVC	Both	Mat=-15	Pht=-01	Yld=130	Gpc=30	w(-15,-1,130,30)	GPC=0	-1.34751	-3.42288	0.485664	0	86.7718	0.877805	87.8905	82.738	5.395	14.6285	-446.339
BVC	Both	Mat=-15	Pht=-01	Yld=130	Gpc=40	w(-15,-1,130,40)	GPC=0	-1.34751	-3.42288	0.485664	1.37438e-16	86.7718	0.811414	87.8905	82.738	5.395	14.6285	-446.339
BVC	Both	Mat=-15	Pht=-01	Yld=130	Gpc=50	w(-15,-1,130,50)	GPC=0	-1.34751	-3.42288	0.485664	1.26106e-16	86.7718	0.734494	87.8905	82.738	5.395	14.6285	-446.339
BVC	Both	Mat=-15	Pht=-01	Yld=130	Gpc=60	w(-15,-1,130,60)	GPC=0	-1.34751	-3.42288	0.485664	-3.15265e-16	86.7718	0.659075	87.8905	82.738	5.395	14.6285	-446.339
BVC	Both	Mat=-15	Pht=-01	Yld=130	Gpc=70	w(-15,-1,130,70)	GPC=0	-1.34751	-3.42288	0.485664	-1.89159e-16	86.7718	0.590862	87.8905	82.738	5.395	14.6285	-446.339
BVC	Both	Mat=-15	Pht=-01	Yld=130	Gpc=80	w(-15,-1,130,80)	GPC=0	-1.34751	-3.42288	0.485664	0	86.7718	0.531471	87.8905	82.738	5.395	14.6285	-446.339
BVC	Both	Mat=-15	Pht=-01	Yld=140	Gpc=01	w(-15,-1,140,1)	GPC=0	-1.16843	-3.45985	0.505307	1.1929e-16	91.7294	0.867199	88.004	82.6625	5.393	14.727	-361.693
BVC	Both	Mat=-15	Pht=-01	Yld=140	Gpc=10	w(-15,-1,140,10)	GPC=0	-1.16843	-3.45985	0.505307	1.1929e-16	91.7294	0.907643	88.004	82.6625	5.393	14.727	-361.693
BVC	Both	Mat=-15	Pht=-01	Yld=140	Gpc=20	w(-15,-1,140,20)	GPC=0	-1.16843	-3.45985	0.505307	0	91.7294	0.919874	88.004	82.6625	5.393	14.727	-361.693
BVC	Both	Mat=-15	Pht=-01	Yld=140	Gpc=30	w(-15,-1,140,30)	GPC=0	-1.16843	-3.45985	0.505307	-1.1929e-16	91.7294	0.893893	88.004	82.6625	5.393	14.727	-361.693
BVC	Both	Mat=-15	Pht=-01	Yld=140	Gpc=40	w(-15,-1,140,40)	GPC=0	-1.16843	-3.45985	0.505307	-2.38581e-16	91.7294	0.838311	88.004	82.6625	5.393	14.727	-361.693
BVC	Both	Mat=-15	Pht=-01	Yld=140	Gpc=50	w(-15,-1,140,50)	GPC=0	-1.16843	-3.45985	0.505307	0	91.7294	0.767831	88.004	82.6625	5.393	14.727	-361.693
BVC	Both	Mat=-15	Pht=-01	Yld=140	Gpc=60	w(-15,-1,140,60)	GPC=0	-1.16843	-3.45985	0.505307	-2.38581e-16	91.7294	0.694856	88.004	82.6625	5.393	14.727	-361.693
BVC	Both	Mat=-15	Pht=-01	Yld=140	Gpc=70	w(-15,-1,140,70)	GPC=0	-1.16843	-3.45985	0.505307	-2.80307e-17	91.7294	0.626484	88.004	82.6625	5.393	14.727	-361.693
BVC	Both	Mat=-15	Pht=-01	Yld=140	Gpc=80	w(-15,-1,140,80)	GPC=0	-1.16843	-3.45985	0.505307	-3.57871e-16	91.7294	0.56556	88.004	82.6625	5.393	14.727	-361.693
BVC	Both	Mat=-15	Pht=-01	Yld=150	Gpc=01	w(-15,-1,150,1)	GPC=0	-1.00584	-3.4865	0.521959	0	96.868	0.858054	88.1575	82.602	5.4145	14.686	-276.787
BVC	Both	Mat=-15	Pht=-01	Yld=150	Gpc=10	w(-15,-1,150,10)	GPC=0	-1.00584	-3.4865	0.521959	-1.12962e-16	96.868	0.900553	88.1575	82.602	5.4145	14.686	-276.787
BVC	Both	Mat=-15	Pht=-01	Yld=150	Gpc=20	w(-15,-1,150,20)	GPC=0	-1.00584	-3.4865	0.521959	1.12962e-16	96.868	0.920315	88.1575	82.602	5.4145	14.686	-276.787
BVC	Both	Mat=-15	Pht=-01	Yld=150	Gpc=30	w(-15,-1,150,30)	GPC=0	-1.00584	-3.4865	0.521959	0	96.868	0.905532	88.1575	82.602	5.4145	14.686	-276.787
BVC	Both	Mat=-15	Pht=-01	Yld=150	Gpc=40	w(-15,-1,150,40)	GPC=0	-1.00584	-3.4865	0.521959	0	96.868	0.860777	88.1575	82.602	5.4145	14.686	-276.787
BVC	Both	Mat=-15	Pht=-01	Yld=150	Gpc=50	w(-15,-1,150,50)	GPC=0	-1.00584	-3.4865	0.521959	-2.25925e-16	96.868	0.79783	88.1575	82.602	5.4145	14.686	-276.787
BVC	Both	Mat=-15	Pht=-01	Yld=150	Gpc=60	w(-15,-1,150,60)	GPC=0	-1.00584	-3.4865	0.521959	-2.25925e-16	96.868	0.728623	88.1575	82.602	5.4145	14.686	-276.787
BVC	Both	Mat=-15	Pht=-01	Yld=150	Gpc=70	w(-15,-1,150,70)	GPC=0	-1.00584	-3.4865	0.521959	-2.25925e-16	96.868	0.66118	88.1575	82.602	5.4145	14.686	-276.787
BVC	Both	Mat=-15	Pht=-01	Yld=150	Gpc=80	w(-15,-1,150,80)	GPC=0	-1.00584	-3.4865	0.521959	3.38887e-16	96.868	0.599478	88.1575	82.602	5.4145	14.686	-276.787
BVC	Both	Mat=-15	Pht=-05	Yld=001	Gpc=01	w(-15,-5,1,1)	GPC=0	-3.18312	-4.90821	-0.0556232	1.5149e-16	72.2322	0.939635	85.262	80.531	4.6455	14.588	-1651.55
BVC	Both	Mat=-15	Pht=-05	Yld=001	Gpc=10	w(-15,-5,1,10)	GPC=0	-3.18312	-4.90821	-0.0556232	0	72.2322	0.871441	85.262	80.531	4.6455	14.588	-1651.55
BVC	Both	Mat=-15	Pht=-05	Yld=001	Gpc=20	w(-15,-5,1,20)	GPC=0	-3.18312	-4.90821	-0.0556232	0	72.2322	0.772118	85.262	80.531	4.6455	14.588	-1651.55
BVC	Both	Mat=-15	Pht=-05	Yld=001	Gpc=30	w(-15,-5,1,30)	GPC=0	-3.18312	-4.90821	-0.0556232	-7.57449e-17	72.2322	0.673884	85.262	80.531	4.6455	14.588	-1651.55
BVC	Both	Mat=-15	Pht=-05	Yld=001	Gpc=40	w(-15,-5,1,40)	GPC=0	-3.18312	-4.90821	-0.0556232	-1.5149e-16	72.2322	0.588148	85.262	80.531	4.6455	14.588	-1651.55
BVC	Both	Mat=-15	Pht=-05	Yld=001	Gpc=50	w(-15,-5,1,50)	GPC=0	-3.18312	-4.90821	-0.0556232	1.5149e-16	72.2322	0.516828	85.262	80.531	4.6455	14.588	-1651.55
BVC	Both	Mat=-15	Pht=-05	Yld=001	Gpc=60	w(-15,-5,1,60)	GPC=0	-3.18312	-4.90821	-0.0556232	-6.05959e-16	72.2322	0.458312	85.262	80.531	4.6455	14.588	-1651.55
BVC	Both	Mat=-15	Pht=-05	Yld=001	Gpc=70	w(-15,-5,1,70)	GPC=0	-3.18312	-4.90821	-0.0556232	1.5149e-16	72.2322	0.410239	85.262	80.531	4.6455	14.588	-1651.55
BVC	Both	Mat=-15	Pht=-05	Yld=001	Gpc=80	w(-15,-5,1,80)	GPC=0	-3.18312	-4.90821	-0.0556232	-4.5447e-16	72.2322	0.370443	85.262	80.531	4.6455	14.588	-1651.55
BVC	Both	Mat=-15	Pht=-05	Yld=010	Gpc=01	w(-15,-5,10,1)	GPC=0	-3.07296	-5.1809	-0.00318399	-3.8012e-17	71.9671	0.949349	85.159	80.739	4.647	14.6585	-1581.2
BVC	Both	Mat=-15	Pht=-05	Yld=010	Gpc=10	w(-15,-5,10,10)	GPC=0	-3.07296	-5.1809	-0.00318399	2.28072e-16	71.9671	0.890718	85.159	80.739	4.647	14.6585	-1581.2
BVC	Both	Mat=-15	Pht=-05	Yld=010	Gpc=20	w(-15,-5,10,20)	GPC=0	-3.07296	-5.1809	-0.00318399	-1.52048e-16	71.9671	0.794269	85.159	80.739	4.647	14.6585	-1581.2
BVC	Both	Mat=-15	Pht=-05	Yld=010	Gpc=30	w(-15,-5,10,30)	GPC=0	-3.07296	-5.1809	-0.00318399	-1.52048e-16	71.9671	0.694186	85.159	80.739	4.647	14.6585	-1581.2
BVC	Both	Mat=-15	Pht=-05	Yld=010	Gpc=40	w(-15,-5,10,40)	GPC=0	-3.07296	-5.1809	-0.00318399	-3.8012e-17	71.9671	0.605173	85.159	80.739	4.647	14.6585	-1581.2
BVC	Both	Mat=-15	Pht=-05	Yld=010	Gpc=50	w(-15,-5,10,50)	GPC=0	-3.07296	-5.1809	-0.00318399	-7.60239e-17	71.9671	0.530659	85.159	80.739	4.647	14.6585	-1581.2
BVC	Both	Mat=-15	Pht=-05	Yld=010	Gpc=60	w(-15,-5,10,60)	GPC=0	-3.07296	-5.1809	-0.00318399	-1.52048e-16	71.9671	0.469471	85.159	80.739	4.647	14.6585	-1581.2
BVC	Both	Mat=-15	Pht=-05	Yld=010	Gpc=70	w(-15,-5,10,70)	GPC=0	-3.07296	-5.1809	-0.00318399	0	71.9671	0.419279	85.159	80.739	4.647	14.6585	-1581.2
BVC	Both	Mat=-15	Pht=-05	Yld=010	Gpc=80	w(-15,-5,10,80)	GPC=0	-3.07296	-5.1809	-0.00318399	-3.8012e-17	71.9671	0.377828	85.159	80.739	4.647	14.6585	-1581.2
BVC	Both	Mat=-15	Pht=-05	Yld=020	Gpc=01	w(-15,-5,20,1)	GPC=0	-2.92696	-5.44414	0.0551102	1.515e-16	72.2273	0.955653	85.5225	80.089	4.8205	14.656	-1502.23
BVC	Both	Mat=-15	Pht=-05	Yld=020	Gpc=10	w(-15,-5,20,10)	GPC=0	-2.92696	-5.44414	0.0551102	-1.32563e-16	72.2273	0.91041	85.5225	80.089	4.8205	14.656	-1502.23
BVC	Both	Mat=-15	Pht=-05	Yld=020	Gpc=20	w(-15,-5,20,20)	GPC=0	-2.92696	-5.44414	0.0551102	1.515e-16	72.2273	0.820237	85.5225	80.089	4.8205	14.656	-1502.23
BVC	Both	Mat=-15	Pht=-05	Yld=020	Gpc=30	w(-15,-5,20,30)	GPC=0	-2.92696	-5.44414	0.0551102	0	72.2273	0.719753	85.5225	80.089	4.8205	14.656	-1502.23
BVC	Both	Mat=-15	Pht=-05	Yld=020	Gpc=40	w(-15,-5,20,40)	GPC=0	-2.92696	-5.44414	0.0551102	-1.515e-16	72.2273	0.627647	85.5225	80.089	4.8205	14.656	-1502.23
BVC	Both	Mat=-15	Pht=-05	Yld=020	Gpc=50	w(-15,-5,20,50)	GPC=0	-2.92696	-5.44414	0.0551102	-2.2725e-16	72.2273	0.549591	85.5225	80.089	4.8205	14.656	-1502.23
BVC	Both	Mat=-15	Pht=-05	Yld=020	Gpc=60	w(-15,-5,20,60)	GPC=0	-2.92696	-5.44414	0.0551102	-3.03e-16	72.2273	0.485237	85.5225	80.089	4.8205	14.656	-1502.23
BVC	Both	Mat=-15	Pht=-05	Yld=020	Gpc=70	w(-15,-5,20,70)	GPC=0	-2.92696	-5.44414	0.0551102	-3.03e-16	72.2273	0.432434	85.5225	80.089	4.8205	14.656	-1502.23
BVC	Both	Mat=-15	Pht=-05	Yld=020	Gpc=80	w(-15,-5,20,80)	GPC=0	-2.92696	-5.44414	0.0551102	-7.57501e-16	72.2273	0.388888	85.5225	80.089	4.8205	14.656	-1502.23
BVC	Both	Mat=-15	Pht=-05	Yld=030	Gpc=01	w(-15,-5,30,1)	GPC=0	-2.76002	-5.66038	0.112093	2.99527e-16	73.065	0.95678	85.31	80.599	4.803	14.863	-1422.44
BVC	Both	Mat=-15	Pht=-05	Yld=030	Gpc=10	w(-15,-5,30,10)	GPC=0	-2.76002	-5.66038	0.112093	-1.49763e-16	73.065	0.926884	85.31	80.599	4.803	14.863	-1422.44
BVC	Both	Mat=-15	Pht=-05	Yld=030	Gpc=20	w(-15,-5,30,20)	GPC=0	-2.76002	-5.66038	0.112093	1.49763e-16	73.065	0.846388	85.31	80.599	4.803	14.863	-1422.44
BVC	Both	Mat=-15	Pht=-05	Yld=030	Gpc=30	w(-15,-5,30,30)	GPC=0	-2.76002	-5.66038	0.112093	0	73.065	0.747801	85.31	80.599	4.803	14.863	-1422.44
BVC	Both	Mat=-15	Pht=-05	Yld=030	Gpc=40	w(-15,-5,30,40)	GPC=0	-2.76002	-5.66038	0.112093	8.89219e-17	73.065	0.653586	85.31	80.599	4.803	14.863	-1422.44
BVC	Both	Mat=-15	Pht=-05	Yld=030	Gpc=50	w(-15,-5,30,50)	GPC=0	-2.76002	-5.66038	0.112093	1.14662e-16	73.065	0.572217	85.31	80.599	4.803	14.863	-1422.44
BVC	Both	Mat=-15	Pht=-05	Yld=030	Gpc=60	w(-15,-5,30,60)	GPC=0	-2.76002	-5.66038	0.112093	-2.99527e-16	73.065	0.50459	85.31	80.599	4.803	14.863	-1422.44
BVC	Both	Mat=-15	Pht=-05	Yld=030	Gpc=70	w(-15,-5,30,70)	GPC=0	-2.76002	-5.66038	0.112093	-2.87826e-16	73.065	0.448947	85.31	80.599	4.803	14.863	-1422.44
BVC	Both	Mat=-15	Pht=-05	Yld=030	Gpc=80	w(-15,-5,30,80)	GPC=0	-2.76002	-5.66038	0.112093	-1.19343e-16	73.065	0.403051	85.31	80.599	4.803	14.863	-1422.44
BVC	Both	Mat=-15	Pht=-05	Yld=040	Gpc=01	w(-15,-5,40,1)	GPC=0	-2.5774	-5.82772	0.166526	1.10217e-16	74.4606	0.952965	85.7295	79.7895	4.861	14.8825	-1342.3
BVC	Both	Mat=-15	Pht=-05	Yld=040	Gpc=10	w(-15,-5,40,10)	GPC=0	-2.5774	-5.82772	0.166526	-8.0878e-18	74.4606	0.93902	85.7295	79.7895	4.861	14.8825	-1342.3
BVC	Both	Mat=-15	Pht=-05	Yld=040	Gpc=20	w(-15,-5,40,20)	GPC=0	-2.5774	-5.82772	0.166526	-2.93912e-16	74.4606	0.87124	85.7295	79.7895	4.861	14.8825	-1342.3
BVC	Both	Mat=-15	Pht=-05	Yld=040	Gpc=30	w(-15,-5,40,30)	GPC=0	-2.5774	-5.82772	0.166526	-1.83695e-16	74.4606	0.777281	85.7295	79.7895	4.861	14.8825	-1342.3
BVC	Both	Mat=-15	Pht=-05	Yld=040	Gpc=40	w(-15,-5,40,40)	GPC=0	-2.5774	-5.82772	0.166526	-1.10217e-16	74.4606	0.682412	85.7295	79.7895	4.861	14.8825	-1342.3
BVC	Both	Mat=-15	Pht=-05	Yld=040	Gpc=50	w(-15,-5,40,50)	GPC=0	-2.5774	-5.82772	0.166526	-7.34781e-17	74.4606	0.598256	85.7295	79.7895	4.861	14.8825	-1342.3
BVC	Both	Mat=-15	Pht=-05	Yld=040	Gpc=60	w(-15,-5,40,60)	GPC=0	-2.5774	-5.82772	0.166526	-4.40868e-16	74.4606	0.527409	85.7295	79.7895	4.861	14.8825	-1342.3
BVC	Both	Mat=-15	Pht=-05	Yld=040	Gpc=70	w(-15,-5,40,70)	GPC=0	-2.5774	-5.82772	0.166526	-3.6739e-16	74.4606	0.468779	85.7295	79.7895	4.861	14.8825	-1342.3
BVC	Both	Mat=-15	Pht=-05	Yld=040	Gpc=80	w(-15,-5,40,80)	GPC=0	-2.5774	-5.82772	0.166526	-5.87825e-16	74.4606	0.420313	85.7295	79.7895	4.861	14.8825	-1342.3
BVC	Both	Mat=-15	Pht=-05	Yld=050	Gpc=01	w(-15,-5,50,1)	GPC=0	-2.38492	-5.94755	0.217445	1.43256e-16	76.3837	0.945049	85.7295	79.7895	4.861	14.8825	-1261.69
BVC	Both	Mat=-15	Pht=-05	Yld=050	Gpc=10	w(-15,-5,50,10)	GPC=0	-2.38492	-5.94755	0.217445	1.43256e-16	76.3837	0.946275	85.7295	79.7895	4.861	14.8825	-1261.69
BVC	Both	Mat=-15	Pht=-05	Yld=050	Gpc=20	w(-15,-5,50,20)	GPC=0	-2.38492	-5.94755	0.217445	-1.43256e-16	76.3837	0.893365	85.7295	79.7895	4.861	14.8825	-1261.69
BVC	Both	Mat=-15	Pht=-05	Yld=050	Gpc=30	w(-15,-5,50,30)	GPC=0	-2.38492	-5.94755	0.217445	-7.16281e-17	76.3837	0.806891	85.7295	79.7895	4.861	14.8825	-1261.69
BVC	Both	Mat=-15	Pht=-05	Yld=050	Gpc=40	w(-15,-5,50,40)	GPC=0	-2.38492	-5.94755	0.217445	-2.14884e-16	76.3837	0.71326	85.7295	79.7895	4.861	14.8825	-1261.69
BVC	Both	Mat=-15	Pht=-05	Yld=050	Gpc=50	w(-15,-5,50,50)	GPC=0	-2.38492	-5.94755	0.217445	-3.58141e-16	76.3837	0.627196	85.7295	79.7895	4.861	14.8825	-1261.69
BVC	Both	Mat=-15	Pht=-05	Yld=050	Gpc=60	w(-15,-5,50,60)	GPC=0	-2.38492	-5.94755	0.217445	3.58141e-17	76.3837	0.553396	85.7295	79.7895	4.861	14.8825	-1261.69
BVC	Both	Mat=-15	Pht=-05	Yld=050	Gpc=70	w(-15,-5,50,70)	GPC=0	-2.38492	-5.94755	0.217445	-1.43256e-16	76.3837	0.491752	85.7295	79.7895	4.861	14.8825	-1261.69
BVC	Both	Mat=-15	Pht=-05	Yld=050	Gpc=80	w(-15,-5,50,80)	GPC=0	-2.38492	-5.94755	0.217445	-3.93955e-16	76.3837	0.440565	85.7295	79.7895	4.861	14.8825	-1261.69
BVC	Both	Mat=-15	Pht=-05	Yld=060	Gpc=01	w(-15,-5,60,1)	GPC=0	-2.18823	-6.02389	0.264213	2.77742e-16	78.7957	0.934198	86.2425	79.3825	4.964	14.9175	-1180.66
BVC	Both	Mat=-15	Pht=-05	Yld=060	Gpc=10	w(-15,-5,60,10)	GPC=0	-2.18823	-6.02389	0.264213	-6.94356e-17	78.7957	0.948745	86.2425	79.3825	4.964	14.9175	-1180.66
BVC	Both	Mat=-15	Pht=-05	Yld=060	Gpc=20	w(-15,-5,60,20)	GPC=0	-2.18823	-6.02389	0.264213	-6.94356e-17	78.7957	0.911642	86.2425	79.3825	4.964	14.9175	-1180.66
BVC	Both	Mat=-15	Pht=-05	Yld=060	Gpc=30	w(-15,-5,60,30)	GPC=0	-2.18823	-6.02389	0.264213	-2.77742e-16	78.7957	0.835245	86.2425	79.3825	4.964	14.9175	-1180.66
BVC	Both	Mat=-15	Pht=-05	Yld=060	Gpc=40	w(-15,-5,60,40)	GPC=0	-2.18823	-6.02389	0.264213	-1.38871e-16	78.7957	0.745044	86.2425	79.3825	4.964	14.9175	-1180.66
BVC	Both	Mat=-15	Pht=-05	Yld=060	Gpc=50	w(-15,-5,60,50)	GPC=0	-2.18823	-6.02389	0.264213	-6.94356e-17	78.7957	0.658307	86.2425	79.3825	4.964	14.9175	-1180.66
BVC	Both	Mat=-15	Pht=-05	Yld=060	Gpc=60	w(-15,-5,60,60)	GPC=0	-2.18823	-6.02389	0.264213	-3.47178e-16	78.7957	0.582083	86.2425	79.3825	4.964	14.9175	-1180.66
BVC	Both	Mat=-15	Pht=-05	Yld=060	Gpc=70	w(-15,-5,60,70)	GPC=0	-2.18823	-6.02389	0.264213	-4.86049e-16	78.7957	0.517556	86.2425	79.3825	4.964	14.9175	-1180.66
BVC	Both	Mat=-15	Pht=-05	Yld=060	Gpc=80	w(-15,-5,60,80)	GPC=0	-2.18823	-6.02389	0.264213	-4.16614e-16	78.7957	0.463591	86.2425	79.3825	4.964	14.9175	-1180.66
BVC	Both	Mat=-15	Pht=-05	Yld=070	Gpc=01	w(-15,-5,70,1)	GPC=0	-1.99229	-6.06243	0.306522	3.35028e-17	81.6531	0.921607	86.3895	79.396	5.007	14.8895	-1098.87
BVC	Both	Mat=-15	Pht=-05	Yld=070	Gpc=10	w(-15,-5,70,10)	GPC=0	-1.99229	-6.06243	0.306522	3.35028e-17	81.6531	0.947048	86.3895	79.396	5.007	14.8895	-1098.87
BVC	Both	Mat=-15	Pht=-05	Yld=070	Gpc=20	w(-15,-5,70,20)	GPC=0	-1.99229	-6.06243	0.306522	-3.35028e-17	81.6531	0.925444	86.3895	79.396	5.007	14.8895	-1098.87
BVC	Both	Mat=-15	Pht=-05	Yld=070	Gpc=30	w(-15,-5,70,30)	GPC=0	-1.99229	-6.06243	0.306522	-1.34011e-16	81.6531	0.861076	86.3895	79.396	5.007	14.8895	-1098.87
BVC	Both	Mat=-15	Pht=-05	Yld=070	Gpc=40	w(-15,-5,70,40)	GPC=0	-1.99229	-6.06243	0.306522	-6.70057e-17	81.6531	0.776566	86.3895	79.396	5.007	14.8895	-1098.87
BVC	Both	Mat=-15	Pht=-05	Yld=070	Gpc=50	w(-15,-5,70,50)	GPC=0	-1.99229	-6.06243	0.306522	-6.70057e-17	81.6531	0.690697	86.3895	79.396	5.007	14.8895	-1098.87
BVC	Both	Mat=-15	Pht=-05	Yld=070	Gpc=60	w(-15,-5,70,60)	GPC=0	-1.99229	-6.06243	0.306522	-8.98942e-17	81.6531	0.612848	86.3895	79.396	5.007	14.8895	-1098.87
BVC	Both	Mat=-15	Pht=-05	Yld=070	Gpc=70	w(-15,-5,70,70)	GPC=0	-1.99229	-6.06243	0.306522	-2.01017e-16	81.6531	0.545762	86.3895	79.396	5.007	14.8895	-1098.87
BVC	Both	Mat=-15	Pht=-05	Yld=070	Gpc=80	w(-15,-5,70,80)	GPC=0	-1.99229	-6.06243	0.306522	-3.35028e-16	81.6531	0.489084	86.3895	79.396	5.007	14.8895	-1098.87
BVC	Both	Mat=-15	Pht=-05	Yld=080	Gpc=01	w(-15,-5,80,1)	GPC=0	-1.80107	-6.06961	0.344337	2.81902e-16	84.9111	0.908297	86.3475	79.543	4.989	15.008	-1016.88
BVC	Both	Mat=-15	Pht=-05	Yld=080	Gpc=10	w(-15,-5,80,10)	GPC=0	-1.80107	-6.06961	0.344337	-2.4163e-17	84.9111	0.942087	86.3475	79.543	4.989	15.008	-1016.88
BVC	Both	Mat=-15	Pht=-05	Yld=080	Gpc=20	w(-15,-5,80,20)	GPC=0	-1.80107	-6.06961	0.344337	-3.86608e-16	84.9111	0.934675	86.3475	79.543	4.989	15.008	-1016.88
BVC	Both	Mat=-15	Pht=-05	Yld=080	Gpc=30	w(-15,-5,80,30)	GPC=0	-1.80107	-6.06961	0.344337	5.63804e-17	84.9111	0.883411	86.3475	79.543	4.989	15.008	-1016.88
BVC	Both	Mat=-15	Pht=-05	Yld=080	Gpc=40	w(-15,-5,80,40)	GPC=0	-1.80107	-6.06961	0.344337	1.28869e-16	84.9111	0.806653	86.3475	79.543	4.989	15.008	-1016.88
BVC	Both	Mat=-15	Pht=-05	Yld=080	Gpc=50	w(-15,-5,80,50)	GPC=0	-1.80107	-6.06961	0.344337	-1.20815e-16	84.9111	0.723375	86.3475	79.543	4.989	15.008	-1016.88
BVC	Both	Mat=-15	Pht=-05	Yld=080	Gpc=60	w(-15,-5,80,60)	GPC=0	-1.80107	-6.06961	0.344337	-1.28869e-16	84.9111	0.644955	86.3475	79.543	4.989	15.008	-1016.88
BVC	Both	Mat=-15	Pht=-05	Yld=080	Gpc=70	w(-15,-5,80,70)	GPC=0	-1.80107	-6.06961	0.344337	-2.65793e-16	84.9111	0.575838	86.3475	79.543	4.989	15.008	-1016.88
BVC	Both	Mat=-15	Pht=-05	Yld=080	Gpc=80	w(-15,-5,80,80)	GPC=0	-1.80107	-6.06961	0.344337	0	84.9111	0.516654	86.3475	79.543	4.989	15.008	-1016.88
BVC	Both	Mat=-15	Pht=-05	Yld=090	Gpc=01	w(-15,-5,90,1)	GPC=0	-1.61745	-6.05179	0.377831	1.23608e-16	88.5254	0.89503	86.516	80.6585	5.037	15.321	-934.44
BVC	Both	Mat=-15	Pht=-05	Yld=090	Gpc=10	w(-15,-5,90,10)	GPC=0	-1.61745	-6.05179	0.377831	0	88.5254	0.93483	86.516	80.6585	5.037	15.321	-934.44
BVC	Both	Mat=-15	Pht=-05	Yld=090	Gpc=20	w(-15,-5,90,20)	GPC=0	-1.61745	-6.05179	0.377831	0	88.5254	0.939684	86.516	80.6585	5.037	15.321	-934.44
BVC	Both	Mat=-15	Pht=-05	Yld=090	Gpc=30	w(-15,-5,90,30)	GPC=0	-1.61745	-6.05179	0.377831	4.94432e-16	88.5254	0.901682	86.516	80.6585	5.037	15.321	-934.44
BVC	Both	Mat=-15	Pht=-05	Yld=090	Gpc=40	w(-15,-5,90,40)	GPC=0	-1.61745	-6.05179	0.377831	0	88.5254	0.834291	86.516	80.6585	5.037	15.321	-934.44
BVC	Both	Mat=-15	Pht=-05	Yld=090	Gpc=50	w(-15,-5,90,50)	GPC=0	-1.61745	-6.05179	0.377831	2.47216e-16	88.5254	0.755349	86.516	80.6585	5.037	15.321	-934.44
BVC	Both	Mat=-15	Pht=-05	Yld=090	Gpc=60	w(-15,-5,90,60)	GPC=0	-1.61745	-6.05179	0.377831	1.23608e-16	88.5254	0.677606	86.516	80.6585	5.037	15.321	-934.44
BVC	Both	Mat=-15	Pht=-05	Yld=090	Gpc=70	w(-15,-5,90,70)	GPC=0	-1.61745	-6.05179	0.377831	-3.39922e-16	88.5254	0.607182	86.516	80.6585	5.037	15.321	-934.44
BVC	Both	Mat=-15	Pht=-05	Yld=090	Gpc=80	w(-15,-5,90,80)	GPC=0	-1.61745	-6.05179	0.377831	1.42709e-16	88.5254	0.545852	86.516	80.6585	5.037	15.321	-934.44
BVC	Both	Mat=-15	Pht=-05	Yld=100	Gpc=01	w(-15,-5,100,1)	GPC=0	-1.4433	-6.01483	0.407307	-1.18355e-16	92.4543	0.882309	86.8005	80.261	5.08	15.216	-851.225
BVC	Both	Mat=-15	Pht=-05	Yld=100	Gpc=10	w(-15,-5,100,10)	GPC=0	-1.4433	-6.01483	0.407307	2.95888e-17	92.4543	0.926146	86.8005	80.261	5.08	15.216	-851.225
BVC	Both	Mat=-15	Pht=-05	Yld=100	Gpc=20	w(-15,-5,100,20)	GPC=0	-1.4433	-6.01483	0.407307	-2.95888e-17	92.4543	0.941099	86.8005	80.261	5.08	15.216	-851.225
BVC	Both	Mat=-15	Pht=-05	Yld=100	Gpc=30	w(-15,-5,100,30)	GPC=0	-1.4433	-6.01483	0.407307	-1.18355e-16	92.4543	0.915733	86.8005	80.261	5.08	15.216	-851.225
BVC	Both	Mat=-15	Pht=-05	Yld=100	Gpc=40	w(-15,-5,100,40)	GPC=0	-1.4433	-6.01483	0.407307	3.55066e-16	92.4543	0.858725	86.8005	80.261	5.08	15.216	-851.225
BVC	Both	Mat=-15	Pht=-05	Yld=100	Gpc=50	w(-15,-5,100,50)	GPC=0	-1.4433	-6.01483	0.407307	0	92.4543	0.785708	86.8005	80.261	5.08	15.216	-851.225
BVC	Both	Mat=-15	Pht=-05	Yld=100	Gpc=60	w(-15,-5,100,60)	GPC=0	-1.4433	-6.01483	0.407307	-1.18355e-16	92.4543	0.709989	86.8005	80.261	5.08	15.216	-851.225
BVC	Both	Mat=-15	Pht=-05	Yld=100	Gpc=70	w(-15,-5,100,70)	GPC=0	-1.4433	-6.01483	0.407307	0	92.4543	0.639151	86.8005	80.261	5.08	15.216	-851.225
BVC	Both	Mat=-15	Pht=-05	Yld=100	Gpc=80	w(-15,-5,100,80)	GPC=0	-1.4433	-6.01483	0.407307	2.3671e-16	92.4543	0.576182	86.8005	80.261	5.08	15.216	-851.225
BVC	Both	Mat=-15	Pht=-05	Yld=110	Gpc=01	w(-15,-5,110,1)	GPC=0	-1.27968	-5.9638	0.433138	4.52825e-16	96.6594	0.870425	86.8005	80.261	5.08	15.216	-767.916
BVC	Both	Mat=-15	Pht=-05	Yld=110	Gpc=10	w(-15,-5,110,10)	GPC=0	-1.27968	-5.9638	0.433138	2.26412e-16	96.6594	0.916734	86.8005	80.261	5.08	15.216	-767.916
BVC	Both	Mat=-15	Pht=-05	Yld=110	Gpc=20	w(-15,-5,110,20)	GPC=0	-1.27968	-5.9638	0.433138	0	96.6594	0.939663	86.8005	80.261	5.08	15.216	-767.916
BVC	Both	Mat=-15	Pht=-05	Yld=110	Gpc=30	w(-15,-5,110,30)	GPC=0	-1.27968	-5.9638	0.433138	0	96.6594	0.925755	86.8005	80.261	5.08	15.216	-767.916
BVC	Both	Mat=-15	Pht=-05	Yld=110	Gpc=40	w(-15,-5,110,40)	GPC=0	-1.27968	-5.9638	0.433138	1.13206e-16	96.6594	0.87951	86.8005	80.261	5.08	15.216	-767.916
BVC	Both	Mat=-15	Pht=-05	Yld=110	Gpc=50	w(-15,-5,110,50)	GPC=0	-1.27968	-5.9638	0.433138	-8.49047e-17	96.6594	0.813698	86.8005	80.261	5.08	15.216	-767.916
BVC	Both	Mat=-15	Pht=-05	Yld=110	Gpc=60	w(-15,-5,110,60)	GPC=0	-1.27968	-5.9638	0.433138	-3.39619e-16	96.6594	0.74134	86.8005	80.261	5.08	15.216	-767.916
BVC	Both	Mat=-15	Pht=-05	Yld=110	Gpc=70	w(-15,-5,110,70)	GPC=0	-1.27968	-5.9638	0.433138	-1.69809e-16	96.6594	0.671092	86.8005	80.261	5.08	15.216	-767.916
BVC	Both	Mat=-15	Pht=-05	Yld=110	Gpc=80	w(-15,-5,110,80)	GPC=0	-1.27968	-5.9638	0.433138	-4.81126e-16	96.6594	0.607128	86.8005	80.261	5.08	15.216	-767.916
BVC	Both	Mat=-15	Pht=-05	Yld=120	Gpc=01	w(-15,-5,120,1)	GPC=0	-1.12701	-5.90288	0.455723	1.62341e-16	101.106	0.859513	86.8005	80.261	5.08	15.216	-684.606
BVC	Both	Mat=-15	Pht=-05	Yld=120	Gpc=10	w(-15,-5,120,10)	GPC=0	-1.12701	-5.90288	0.455723	2.16454e-16	101.106	0.90711	86.8005	80.261	5.08	15.216	-684.606
BVC	Both	Mat=-15	Pht=-05	Yld=120	Gpc=20	w(-15,-5,120,20)	GPC=0	-1.12701	-5.90288	0.455723	1.08227e-16	101.106	0.936105	86.8005	80.261	5.08	15.216	-684.606
BVC	Both	Mat=-15	Pht=-05	Yld=120	Gpc=30	w(-15,-5,120,30)	GPC=0	-1.12701	-5.90288	0.455723	4.32909e-16	101.106	0.932175	86.8005	80.261	5.08	15.216	-684.606
BVC	Both	Mat=-15	Pht=-05	Yld=120	Gpc=40	w(-15,-5,120,40)	GPC=0	-1.12701	-5.90288	0.455723	3.24682e-16	101.106	0.896504	86.8005	80.261	5.08	15.216	-684.606
BVC	Both	Mat=-15	Pht=-05	Yld=120	Gpc=50	w(-15,-5,120,50)	GPC=0	-1.12701	-5.90288	0.455723	-5.41136e-17	101.106	0.838774	86.8005	80.261	5.08	15.216	-684.606
BVC	Both	Mat=-15	Pht=-05	Yld=120	Gpc=60	w(-15,-5,120,60)	GPC=0	-1.12701	-5.90288	0.455723	-2.16454e-16	101.106	0.770988	86.8005	80.261	5.08	15.216	-684.606
BVC	Both	Mat=-15	Pht=-05	Yld=120	Gpc=70	w(-15,-5,120,70)	GPC=0	-1.12701	-5.90288	0.455723	-1.62341e-16	101.106	0.702383	86.8005	80.261	5.08	15.216	-684.606
BVC	Both	Mat=-15	Pht=-05	Yld=120	Gpc=80	w(-15,-5,120,80)	GPC=0	-1.12701	-5.90288	0.455723	0	101.106	0.638169	86.8005	80.261	5.08	15.216	-684.606
BVC	Both	Mat=-15	Pht=-05	Yld=130	Gpc=01	w(-15,-5,130,1)	GPC=0	-0.985223	-5.83541	0.475454	2.06921e-16	105.764	0.849607	87.5165	79.896	5.1605	15.165	-601.155
BVC	Both	Mat=-15	Pht=-05	Yld=130	Gpc=10	w(-15,-5,130,10)	GPC=0	-0.985223	-5.83541	0.475454	5.17303e-17	105.764	0.897624	87.5165	79.896	5.1605	15.165	-601.155
BVC	Both	Mat=-15	Pht=-05	Yld=130	Gpc=20	w(-15,-5,130,20)	GPC=0	-0.985223	-5.83541	0.475454	5.17303e-17	105.764	0.931067	87.5165	79.896	5.1605	15.165	-601.155
BVC	Both	Mat=-15	Pht=-05	Yld=130	Gpc=30	w(-15,-5,130,30)	GPC=0	-0.985223	-5.83541	0.475454	1.55191e-16	105.764	0.935544	87.5165	79.896	5.1605	15.165	-601.155
BVC	Both	Mat=-15	Pht=-05	Yld=130	Gpc=40	w(-15,-5,130,40)	GPC=0	-0.985223	-5.83541	0.475454	-1.03461e-16	105.764	0.909816	87.5165	79.896	5.1605	15.165	-601.155
BVC	Both	Mat=-15	Pht=-05	Yld=130	Gpc=50	w(-15,-5,130,50)	GPC=0	-0.985223	-5.83541	0.475454	-2.06921e-16	105.764	0.860616	87.5165	79.896	5.1605	15.165	-601.155
BVC	Both	Mat=-15	Pht=-05	Yld=130	Gpc=60	w(-15,-5,130,60)	GPC=0	-0.985223	-5.83541	0.475454	1.03461e-16	105.764	0.798399	87.5165	79.896	5.1605	15.165	-601.155
BVC	Both	Mat=-15	Pht=-05	Yld=130	Gpc=70	w(-15,-5,130,70)	GPC=0	-0.985223	-5.83541	0.475454	0	105.764	0.73246	87.5165	79.896	5.1605	15.165	-601.155
[truncated: 307 more rows]

## Sheet: B) Yield restricted
Table S4 (continued)
B) RLPSI computed by restricting the expected genetic gain for grain yield to zero
Population	Management	Weight (Mat)	Weight (Height)	Weight (Yield)	Weight (GPC)	All traits weight	Restriction	Fixed	Exp. gain (Mat)	Exp. gain (Pht)	Exp. gain (Yield)	Exp. gain (GPC)	Response	Correlation	Maturity (d)	Height (cm)	Yield (t/ha)	GPC (%)	RLPSI	Comment
BVC	Both	Mat=-1	Pht=-1	Yld=1	Gpc=1	w(-1,-1,1,1)	CC1=c(0,0,1,0)	Yield	-1.74001	-7.55145	9.13245e-17	0.069434	9.36089	0.927099	87.279	76.7015	4.767	14.6375	-149.406
BVC	Both	Mat=-1	Pht=-1	Yld=1	Gpc=10	w(-1,-1,1,10)	CC1=c(0,0,1,0)	Yield	-2.04948	-1.9992	-7.87382e-17	1.33229	17.3716	0.865052	87.683	81.379	4.8985	15.9805	40.4357
BVC	Both	Mat=-1	Pht=-1	Yld=1	Gpc=20	w(-1,-1,1,20)	CC1=c(0,0,1,0)	Yield	-1.79149	0.164042	-1.71767e-16	1.51125	31.8525	0.808663	87.777	83.894	4.9025	16.1655	256.686
BVC	Both	Mat=-1	Pht=-1	Yld=1	Gpc=30	w(-1,-1,1,30)	CC1=c(0,0,1,0)	Yield	-1.66387	0.95732	-1.15931e-16	1.54958	47.1938	0.791417	87.837	84.2845	4.906	16.179	473.657
BVC	Both	Mat=-1	Pht=-1	Yld=1	Gpc=40	w(-1,-1,1,40)	CC1=c(0,0,1,0)	Yield	-1.59294	1.35633	-8.71661e-17	1.56328	62.7678	0.783576	87.6075	86.0245	4.886	16.2475	690.911
BVC	Both	Mat=-1	Pht=-1	Yld=1	Gpc=50	w(-1,-1,1,50)	CC1=c(0,0,1,0)	Yield	-1.54834	1.59478	-1.39508e-16	1.56965	78.436	0.779169	87.6075	86.0245	4.886	16.2475	908.337
BVC	Both	Mat=-1	Pht=-1	Yld=1	Gpc=60	w(-1,-1,1,60)	CC1=c(0,0,1,0)	Yield	-1.51784	1.75295	-2.32444e-16	1.57311	94.1514	0.776365	87.6075	86.0245	4.886	16.2475	1125.76
BVC	Both	Mat=-1	Pht=-1	Yld=1	Gpc=70	w(-1,-1,1,70)	CC1=c(0,0,1,0)	Yield	-1.4957	1.86542	-9.95731e-17	1.57519	109.894	0.77443	87.781	86.1085	4.893	16.2415	1343.2
BVC	Both	Mat=-1	Pht=-1	Yld=1	Gpc=80	w(-1,-1,1,80)	CC1=c(0,0,1,0)	Yield	-1.4789	1.94943	0	1.57654	125.653	0.773016	87.781	86.1085	4.893	16.2415	1560.66
BVC	Both	Mat=-1	Pht=-1	Yld=10	Gpc=1	w(-1,-1,10,1)	CC1=c(0,0,1,0)	Yield	-1.74001	-7.55145	3.10503e-16	0.069434	9.36089	0.653243	87.279	76.7015	4.767	14.6375	-149.406
BVC	Both	Mat=-1	Pht=-1	Yld=10	Gpc=10	w(-1,-1,10,10)	CC1=c(0,0,1,0)	Yield	-2.04948	-1.9992	7.87382e-17	1.33229	17.3716	0.960595	87.683	81.379	4.8985	15.9805	40.4357
BVC	Both	Mat=-1	Pht=-1	Yld=10	Gpc=20	w(-1,-1,10,20)	CC1=c(0,0,1,0)	Yield	-1.79149	0.164042	0	1.51125	31.8525	0.891809	87.777	83.894	4.9025	16.1655	256.686
BVC	Both	Mat=-1	Pht=-1	Yld=10	Gpc=30	w(-1,-1,10,30)	CC1=c(0,0,1,0)	Yield	-1.66387	0.95732	-1.15931e-16	1.54958	47.1938	0.850294	87.837	84.2845	4.906	16.179	473.657
BVC	Both	Mat=-1	Pht=-1	Yld=10	Gpc=40	w(-1,-1,10,40)	CC1=c(0,0,1,0)	Yield	-1.59294	1.35633	-8.71661e-17	1.56328	62.7678	0.828354	87.6075	86.0245	4.886	16.2475	690.911
BVC	Both	Mat=-1	Pht=-1	Yld=10	Gpc=50	w(-1,-1,10,50)	CC1=c(0,0,1,0)	Yield	-1.54834	1.59478	-1.39508e-16	1.56965	78.436	0.815137	87.6075	86.0245	4.886	16.2475	908.337
BVC	Both	Mat=-1	Pht=-1	Yld=10	Gpc=60	w(-1,-1,10,60)	CC1=c(0,0,1,0)	Yield	-1.51784	1.75295	-1.16222e-16	1.57311	94.1514	0.806371	87.6075	86.0245	4.886	16.2475	1125.76
BVC	Both	Mat=-1	Pht=-1	Yld=10	Gpc=70	w(-1,-1,10,70)	CC1=c(0,0,1,0)	Yield	-1.4957	1.86542	-1.99146e-16	1.57519	109.894	0.80015	87.781	86.1085	4.893	16.2415	1343.2
BVC	Both	Mat=-1	Pht=-1	Yld=10	Gpc=80	w(-1,-1,10,80)	CC1=c(0,0,1,0)	Yield	-1.4789	1.94943	-1.7417e-16	1.57654	125.653	0.795514	87.781	86.1085	4.893	16.2415	1560.66
BVC	Both	Mat=-1	Pht=-1	Yld=20	Gpc=1	w(-1,-1,20,1)	CC1=c(0,0,1,0)	Yield	-1.74001	-7.55145	4.56623e-16	0.069434	9.36089	0.433388	87.279	76.7015	4.767	14.6375	-149.406
BVC	Both	Mat=-1	Pht=-1	Yld=20	Gpc=10	w(-1,-1,20,10)	CC1=c(0,0,1,0)	Yield	-2.04948	-1.9992	7.87382e-17	1.33229	17.3716	0.881184	87.683	81.379	4.8985	15.9805	40.4357
BVC	Both	Mat=-1	Pht=-1	Yld=20	Gpc=20	w(-1,-1,20,20)	CC1=c(0,0,1,0)	Yield	-1.79149	0.164042	0	1.51125	31.8525	0.953683	87.777	83.894	4.9025	16.1655	256.686
BVC	Both	Mat=-1	Pht=-1	Yld=20	Gpc=30	w(-1,-1,20,30)	CC1=c(0,0,1,0)	Yield	-1.66387	0.95732	0	1.54958	47.1938	0.908472	87.837	84.2845	4.906	16.179	473.657
BVC	Both	Mat=-1	Pht=-1	Yld=20	Gpc=40	w(-1,-1,20,40)	CC1=c(0,0,1,0)	Yield	-1.59294	1.35633	-8.71661e-17	1.56328	62.7678	0.875666	87.6075	86.0245	4.886	16.2475	690.911
BVC	Both	Mat=-1	Pht=-1	Yld=20	Gpc=50	w(-1,-1,20,50)	CC1=c(0,0,1,0)	Yield	-1.54834	1.59478	-1.39508e-16	1.56965	78.436	0.854097	87.6075	86.0245	4.886	16.2475	908.337
BVC	Both	Mat=-1	Pht=-1	Yld=20	Gpc=60	w(-1,-1,20,60)	CC1=c(0,0,1,0)	Yield	-1.51784	1.75295	-2.32444e-16	1.57311	94.1514	0.839249	87.6075	86.0245	4.886	16.2475	1125.76
BVC	Both	Mat=-1	Pht=-1	Yld=20	Gpc=70	w(-1,-1,20,70)	CC1=c(0,0,1,0)	Yield	-1.4957	1.86542	-9.95731e-17	1.57519	109.894	0.828504	87.781	86.1085	4.893	16.2415	1343.2
BVC	Both	Mat=-1	Pht=-1	Yld=20	Gpc=80	w(-1,-1,20,80)	CC1=c(0,0,1,0)	Yield	-1.4789	1.94943	-1.7417e-16	1.57654	125.653	0.820401	87.781	86.1085	4.893	16.2415	1560.66
BVC	Both	Mat=-1	Pht=-1	Yld=30	Gpc=1	w(-1,-1,30,1)	CC1=c(0,0,1,0)	Yield	-1.74001	-7.55145	8.03656e-16	0.069434	9.36089	0.315248	87.279	76.7015	4.767	14.6375	-149.406
BVC	Both	Mat=-1	Pht=-1	Yld=30	Gpc=10	w(-1,-1,30,10)	CC1=c(0,0,1,0)	Yield	-2.04948	-1.9992	3.14953e-16	1.33229	17.3716	0.706699	87.683	81.379	4.8985	15.9805	40.4357
BVC	Both	Mat=-1	Pht=-1	Yld=30	Gpc=20	w(-1,-1,30,20)	CC1=c(0,0,1,0)	Yield	-1.79149	0.164042	8.58837e-17	1.51125	31.8525	0.956327	87.777	83.894	4.9025	16.1655	256.686
BVC	Both	Mat=-1	Pht=-1	Yld=30	Gpc=30	w(-1,-1,30,30)	CC1=c(0,0,1,0)	Yield	-1.66387	0.95732	0	1.54958	47.1938	0.94945	87.837	84.2845	4.906	16.179	473.657
BVC	Both	Mat=-1	Pht=-1	Yld=30	Gpc=40	w(-1,-1,30,40)	CC1=c(0,0,1,0)	Yield	-1.59294	1.35633	0	1.56328	62.7678	0.916699	87.6075	86.0245	4.886	16.2475	690.911
BVC	Both	Mat=-1	Pht=-1	Yld=30	Gpc=50	w(-1,-1,30,50)	CC1=c(0,0,1,0)	Yield	-1.54834	1.59478	-1.39508e-16	1.56965	78.436	0.890272	87.6075	86.0245	4.886	16.2475	908.337
BVC	Both	Mat=-1	Pht=-1	Yld=30	Gpc=60	w(-1,-1,30,60)	CC1=c(0,0,1,0)	Yield	-1.51784	1.75295	0	1.57311	94.1514	0.870715	87.6075	86.0245	4.886	16.2475	1125.76
BVC	Both	Mat=-1	Pht=-1	Yld=30	Gpc=70	w(-1,-1,30,70)	CC1=c(0,0,1,0)	Yield	-1.4957	1.86542	-9.95731e-17	1.57519	109.894	0.856074	87.781	86.1085	4.893	16.2415	1343.2
BVC	Both	Mat=-1	Pht=-1	Yld=30	Gpc=80	w(-1,-1,30,80)	CC1=c(0,0,1,0)	Yield	-1.4789	1.94943	-8.70848e-17	1.57654	125.653	0.844825	87.781	86.1085	4.893	16.2415	1560.66
BVC	Both	Mat=-1	Pht=-1	Yld=40	Gpc=1	w(-1,-1,40,1)	CC1=c(0,0,1,0)	Yield	-1.74001	-7.55145	9.6804e-16	0.069434	9.36089	0.245752	87.279	76.7015	4.767	14.6375	-149.406
BVC	Both	Mat=-1	Pht=-1	Yld=40	Gpc=10	w(-1,-1,40,10)	CC1=c(0,0,1,0)	Yield	-2.04948	-1.9992	3.93691e-16	1.33229	17.3716	0.556666	87.683	81.379	4.8985	15.9805	40.4357
BVC	Both	Mat=-1	Pht=-1	Yld=40	Gpc=20	w(-1,-1,40,20)	CC1=c(0,0,1,0)	Yield	-1.79149	0.164042	8.58837e-17	1.51125	31.8525	0.89834	87.777	83.894	4.9025	16.1655	256.686
BVC	Both	Mat=-1	Pht=-1	Yld=40	Gpc=30	w(-1,-1,40,30)	CC1=c(0,0,1,0)	Yield	-1.66387	0.95732	0	1.54958	47.1938	0.96398	87.837	84.2845	4.906	16.179	473.657
BVC	Both	Mat=-1	Pht=-1	Yld=40	Gpc=40	w(-1,-1,40,40)	CC1=c(0,0,1,0)	Yield	-1.59294	1.35633	8.71661e-17	1.56328	62.7678	0.94705	87.6075	86.0245	4.886	16.2475	690.911
BVC	Both	Mat=-1	Pht=-1	Yld=40	Gpc=50	w(-1,-1,40,50)	CC1=c(0,0,1,0)	Yield	-1.54834	1.59478	-2.79016e-16	1.56965	78.436	0.921516	87.6075	86.0245	4.886	16.2475	908.337
BVC	Both	Mat=-1	Pht=-1	Yld=40	Gpc=60	w(-1,-1,40,60)	CC1=c(0,0,1,0)	Yield	-1.51784	1.75295	-1.16222e-16	1.57311	94.1514	0.899617	87.6075	86.0245	4.886	16.2475	1125.76
BVC	Both	Mat=-1	Pht=-1	Yld=40	Gpc=70	w(-1,-1,40,70)	CC1=c(0,0,1,0)	Yield	-1.4957	1.86542	-9.95731e-17	1.57519	109.894	0.882183	87.781	86.1085	4.893	16.2415	1343.2
BVC	Both	Mat=-1	Pht=-1	Yld=40	Gpc=80	w(-1,-1,40,80)	CC1=c(0,0,1,0)	Yield	-1.4789	1.94943	-8.70848e-17	1.57654	125.653	0.868358	87.781	86.1085	4.893	16.2415	1560.66
BVC	Both	Mat=-1	Pht=-1	Yld=50	Gpc=1	w(-1,-1,50,1)	CC1=c(0,0,1,0)	Yield	-1.74001	-7.55145	1.20548e-15	0.069434	9.36089	0.20076	87.279	76.7015	4.767	14.6375	-149.406
BVC	Both	Mat=-1	Pht=-1	Yld=50	Gpc=10	w(-1,-1,50,10)	CC1=c(0,0,1,0)	Yield	-2.04948	-1.9992	3.93691e-16	1.33229	17.3716	0.448914	87.683	81.379	4.8985	15.9805	40.4357
BVC	Both	Mat=-1	Pht=-1	Yld=50	Gpc=20	w(-1,-1,50,20)	CC1=c(0,0,1,0)	Yield	-1.79149	0.164042	2.57651e-16	1.51125	31.8525	0.806703	87.777	83.894	4.9025	16.1655	256.686
BVC	Both	Mat=-1	Pht=-1	Yld=50	Gpc=30	w(-1,-1,50,30)	CC1=c(0,0,1,0)	Yield	-1.66387	0.95732	1.15931e-16	1.54958	47.1938	0.948269	87.837	84.2845	4.906	16.179	473.657
BVC	Both	Mat=-1	Pht=-1	Yld=50	Gpc=40	w(-1,-1,50,40)	CC1=c(0,0,1,0)	Yield	-1.59294	1.35633	8.71661e-17	1.56328	62.7678	0.962702	87.6075	86.0245	4.886	16.2475	690.911
BVC	Both	Mat=-1	Pht=-1	Yld=50	Gpc=50	w(-1,-1,50,50)	CC1=c(0,0,1,0)	Yield	-1.54834	1.59478	-1.39508e-16	1.56965	78.436	0.945539	87.6075	86.0245	4.886	16.2475	908.337
BVC	Both	Mat=-1	Pht=-1	Yld=50	Gpc=60	w(-1,-1,50,60)	CC1=c(0,0,1,0)	Yield	-1.51784	1.75295	-1.16222e-16	1.57311	94.1514	0.924657	87.6075	86.0245	4.886	16.2475	1125.76
BVC	Both	Mat=-1	Pht=-1	Yld=50	Gpc=70	w(-1,-1,50,70)	CC1=c(0,0,1,0)	Yield	-1.4957	1.86542	-9.95731e-17	1.57519	109.894	0.906056	87.781	86.1085	4.893	16.2415	1343.2
BVC	Both	Mat=-1	Pht=-1	Yld=50	Gpc=80	w(-1,-1,50,80)	CC1=c(0,0,1,0)	Yield	-1.4789	1.94943	-1.7417e-16	1.57654	125.653	0.890509	87.781	86.1085	4.893	16.2415	1560.66
BVC	Both	Mat=-1	Pht=-1	Yld=60	Gpc=1	w(-1,-1,60,1)	CC1=c(0,0,1,0)	Yield	-1.74001	-7.55145	1.47946e-15	0.069434	9.36089	0.169463	87.279	76.7015	4.767	14.6375	-149.406
BVC	Both	Mat=-1	Pht=-1	Yld=60	Gpc=10	w(-1,-1,60,10)	CC1=c(0,0,1,0)	Yield	-2.04948	-1.9992	7.08644e-16	1.33229	17.3716	0.372481	87.683	81.379	4.8985	15.9805	40.4357
BVC	Both	Mat=-1	Pht=-1	Yld=60	Gpc=20	w(-1,-1,60,20)	CC1=c(0,0,1,0)	Yield	-1.79149	0.164042	3.43535e-16	1.51125	31.8525	0.709607	87.777	83.894	4.9025	16.1655	256.686
BVC	Both	Mat=-1	Pht=-1	Yld=60	Gpc=30	w(-1,-1,60,30)	CC1=c(0,0,1,0)	Yield	-1.66387	0.95732	1.15931e-16	1.54958	47.1938	0.906405	87.837	84.2845	4.906	16.179	473.657
BVC	Both	Mat=-1	Pht=-1	Yld=60	Gpc=40	w(-1,-1,60,40)	CC1=c(0,0,1,0)	Yield	-1.59294	1.35633	8.71661e-17	1.56328	62.7678	0.96131	87.6075	86.0245	4.886	16.2475	690.911
BVC	Both	Mat=-1	Pht=-1	Yld=60	Gpc=50	w(-1,-1,60,50)	CC1=c(0,0,1,0)	Yield	-1.54834	1.59478	-1.39508e-16	1.56965	78.436	0.960265	87.6075	86.0245	4.886	16.2475	908.337
BVC	Both	Mat=-1	Pht=-1	Yld=60	Gpc=60	w(-1,-1,60,60)	CC1=c(0,0,1,0)	Yield	-1.51784	1.75295	0	1.57311	94.1514	0.944507	87.6075	86.0245	4.886	16.2475	1125.76
BVC	Both	Mat=-1	Pht=-1	Yld=60	Gpc=70	w(-1,-1,60,70)	CC1=c(0,0,1,0)	Yield	-1.4957	1.86542	0	1.57519	109.894	0.92686	87.781	86.1085	4.893	16.2415	1343.2
BVC	Both	Mat=-1	Pht=-1	Yld=60	Gpc=80	w(-1,-1,60,80)	CC1=c(0,0,1,0)	Yield	-1.4789	1.94943	-1.7417e-16	1.57654	125.653	0.91074	87.781	86.1085	4.893	16.2415	1560.66
BVC	Both	Mat=-1	Pht=-1	Yld=70	Gpc=1	w(-1,-1,70,1)	CC1=c(0,0,1,0)	Yield	-1.74001	-7.55145	1.58905e-15	0.069434	9.36089	0.146506	87.279	76.7015	4.767	14.6375	-149.406
BVC	Both	Mat=-1	Pht=-1	Yld=70	Gpc=10	w(-1,-1,70,10)	CC1=c(0,0,1,0)	Yield	-2.04948	-1.9992	7.08644e-16	1.33229	17.3716	0.316808	87.683	81.379	4.8985	15.9805	40.4357
BVC	Both	Mat=-1	Pht=-1	Yld=70	Gpc=20	w(-1,-1,70,20)	CC1=c(0,0,1,0)	Yield	-1.79149	0.164042	3.43535e-16	1.51125	31.8525	0.621728	87.777	83.894	4.9025	16.1655	256.686
BVC	Both	Mat=-1	Pht=-1	Yld=70	Gpc=30	w(-1,-1,70,30)	CC1=c(0,0,1,0)	Yield	-1.66387	0.95732	3.47793e-16	1.54958	47.1938	0.847755	87.837	84.2845	4.906	16.179	473.657
BVC	Both	Mat=-1	Pht=-1	Yld=70	Gpc=40	w(-1,-1,70,40)	CC1=c(0,0,1,0)	Yield	-1.59294	1.35633	8.71661e-17	1.56328	62.7678	0.94309	87.6075	86.0245	4.886	16.2475	690.911
BVC	Both	Mat=-1	Pht=-1	Yld=70	Gpc=50	w(-1,-1,70,50)	CC1=c(0,0,1,0)	Yield	-1.54834	1.59478	0	1.56965	78.436	0.96428	87.6075	86.0245	4.886	16.2475	908.337
BVC	Both	Mat=-1	Pht=-1	Yld=70	Gpc=60	w(-1,-1,70,60)	CC1=c(0,0,1,0)	Yield	-1.51784	1.75295	0	1.57311	94.1514	0.957964	87.6075	86.0245	4.886	16.2475	1125.76
BVC	Both	Mat=-1	Pht=-1	Yld=70	Gpc=70	w(-1,-1,70,70)	CC1=c(0,0,1,0)	Yield	-1.4957	1.86542	0	1.57519	109.894	0.94376	87.781	86.1085	4.893	16.2415	1343.2
BVC	Both	Mat=-1	Pht=-1	Yld=70	Gpc=80	w(-1,-1,70,80)	CC1=c(0,0,1,0)	Yield	-1.4789	1.94943	8.70848e-17	1.57654	125.653	0.928487	87.781	86.1085	4.893	16.2415	1560.66
BVC	Both	Mat=-1	Pht=-1	Yld=80	Gpc=1	w(-1,-1,80,1)	CC1=c(0,0,1,0)	Yield	-1.74001	-7.55145	1.90956e-17	0.069434	9.36089	0.128976	87.279	76.7015	4.767	14.6375	-149.406
BVC	Both	Mat=-1	Pht=-1	Yld=80	Gpc=10	w(-1,-1,80,10)	CC1=c(0,0,1,0)	Yield	-2.04948	-1.9992	-2.75584e-16	1.33229	17.3716	0.274934	87.683	81.379	4.8985	15.9805	40.4357
BVC	Both	Mat=-1	Pht=-1	Yld=80	Gpc=20	w(-1,-1,80,20)	CC1=c(0,0,1,0)	Yield	-1.79149	0.164042	-1.71767e-16	1.51125	31.8525	0.547185	87.777	83.894	4.9025	16.1655	256.686
BVC	Both	Mat=-1	Pht=-1	Yld=80	Gpc=30	w(-1,-1,80,30)	CC1=c(0,0,1,0)	Yield	-1.66387	0.95732	0	1.54958	47.1938	0.782107	87.837	84.2845	4.906	16.179	473.657
BVC	Both	Mat=-1	Pht=-1	Yld=80	Gpc=40	w(-1,-1,80,40)	CC1=c(0,0,1,0)	Yield	-1.59294	1.35633	1.74332e-16	1.56328	62.7678	0.910736	87.6075	86.0245	4.886	16.2475	690.911
BVC	Both	Mat=-1	Pht=-1	Yld=80	Gpc=50	w(-1,-1,80,50)	CC1=c(0,0,1,0)	Yield	-1.54834	1.59478	-1.39508e-16	1.56965	78.436	0.957177	87.6075	86.0245	4.886	16.2475	908.337
BVC	Both	Mat=-1	Pht=-1	Yld=80	Gpc=60	w(-1,-1,80,60)	CC1=c(0,0,1,0)	Yield	-1.51784	1.75295	1.16222e-16	1.57311	94.1514	0.964132	87.6075	86.0245	4.886	16.2475	1125.76
BVC	Both	Mat=-1	Pht=-1	Yld=80	Gpc=70	w(-1,-1,80,70)	CC1=c(0,0,1,0)	Yield	-1.4957	1.86542	1.99146e-16	1.57519	109.894	0.956	87.781	86.1085	4.893	16.2415	1343.2
BVC	Both	Mat=-1	Pht=-1	Yld=80	Gpc=80	w(-1,-1,80,80)	CC1=c(0,0,1,0)	Yield	-1.4789	1.94943	-8.70848e-17	1.57654	125.653	0.943195	87.781	86.1085	4.893	16.2415	1560.66
BVC	Both	Mat=-1	Pht=-1	Yld=90	Gpc=1	w(-1,-1,90,1)	CC1=c(0,0,1,0)	Yield	-1.74001	-7.55145	2.04567e-15	0.069434	9.36089	0.115165	87.279	76.7015	4.767	14.6375	-149.406
BVC	Both	Mat=-1	Pht=-1	Yld=90	Gpc=10	w(-1,-1,90,10)	CC1=c(0,0,1,0)	Yield	-2.04948	-1.9992	1.0236e-15	1.33229	17.3716	0.242494	87.683	81.379	4.8985	15.9805	40.4357
BVC	Both	Mat=-1	Pht=-1	Yld=90	Gpc=20	w(-1,-1,90,20)	CC1=c(0,0,1,0)	Yield	-1.79149	0.164042	4.29419e-16	1.51125	31.8525	0.485383	87.777	83.894	4.9025	16.1655	256.686
BVC	Both	Mat=-1	Pht=-1	Yld=90	Gpc=30	w(-1,-1,90,30)	CC1=c(0,0,1,0)	Yield	-1.66387	0.95732	0	1.54958	47.1938	0.716604	87.837	84.2845	4.906	16.179	473.657
BVC	Both	Mat=-1	Pht=-1	Yld=90	Gpc=40	w(-1,-1,90,40)	CC1=c(0,0,1,0)	Yield	-1.59294	1.35633	-8.71661e-17	1.56328	62.7678	0.868408	87.6075	86.0245	4.886	16.2475	690.911
BVC	Both	Mat=-1	Pht=-1	Yld=90	Gpc=50	w(-1,-1,90,50)	CC1=c(0,0,1,0)	Yield	-1.54834	1.59478	-6.9754e-17	1.56965	78.436	0.939669	87.6075	86.0245	4.886	16.2475	908.337
BVC	Both	Mat=-1	Pht=-1	Yld=90	Gpc=60	w(-1,-1,90,60)	CC1=c(0,0,1,0)	Yield	-1.51784	1.75295	0	1.57311	94.1514	0.962579	87.6075	86.0245	4.886	16.2475	1125.76
BVC	Both	Mat=-1	Pht=-1	Yld=90	Gpc=70	w(-1,-1,90,70)	CC1=c(0,0,1,0)	Yield	-1.4957	1.86542	9.95731e-17	1.57519	109.894	0.962983	87.781	86.1085	4.893	16.2415	1343.2
BVC	Both	Mat=-1	Pht=-1	Yld=90	Gpc=80	w(-1,-1,90,80)	CC1=c(0,0,1,0)	Yield	-1.4789	1.94943	0	1.57654	125.653	0.954357	87.781	86.1085	4.893	16.2415	1560.66
BVC	Both	Mat=-1	Pht=-1	Yld=100	Gpc=1	w(-1,-1,100,1)	CC1=c(0,0,1,0)	Yield	-1.74001	-7.55145	2.28311e-15	0.069434	9.36089	0.104009	87.279	76.7015	4.767	14.6375	-149.406
BVC	Both	Mat=-1	Pht=-1	Yld=100	Gpc=10	w(-1,-1,100,10)	CC1=c(0,0,1,0)	Yield	-2.04948	-1.9992	-3.54322e-16	1.33229	17.3716	0.216713	87.683	81.379	4.8985	15.9805	40.4357
BVC	Both	Mat=-1	Pht=-1	Yld=100	Gpc=20	w(-1,-1,100,20)	CC1=c(0,0,1,0)	Yield	-1.79149	0.164042	-1.71767e-16	1.51125	31.8525	0.434332	87.777	83.894	4.9025	16.1655	256.686
BVC	Both	Mat=-1	Pht=-1	Yld=100	Gpc=30	w(-1,-1,100,30)	CC1=c(0,0,1,0)	Yield	-1.66387	0.95732	-1.15931e-16	1.54958	47.1938	0.65526	87.837	84.2845	4.906	16.179	473.657
BVC	Both	Mat=-1	Pht=-1	Yld=100	Gpc=40	w(-1,-1,100,40)	CC1=c(0,0,1,0)	Yield	-1.59294	1.35633	0	1.56328	62.7678	0.82047	87.6075	86.0245	4.886	16.2475	690.911
BVC	Both	Mat=-1	Pht=-1	Yld=100	Gpc=50	w(-1,-1,100,50)	CC1=c(0,0,1,0)	Yield	-1.54834	1.59478	-6.9754e-17	1.56965	78.436	0.913398	87.6075	86.0245	4.886	16.2475	908.337
BVC	Both	Mat=-1	Pht=-1	Yld=100	Gpc=60	w(-1,-1,100,60)	CC1=c(0,0,1,0)	Yield	-1.51784	1.75295	0	1.57311	94.1514	0.953414	87.6075	86.0245	4.886	16.2475	1125.76
BVC	Both	Mat=-1	Pht=-1	Yld=100	Gpc=70	w(-1,-1,100,70)	CC1=c(0,0,1,0)	Yield	-1.4957	1.86542	0	1.57519	109.894	0.964353	87.781	86.1085	4.893	16.2415	1343.2
BVC	Both	Mat=-1	Pht=-1	Yld=100	Gpc=80	w(-1,-1,100,80)	CC1=c(0,0,1,0)	Yield	-1.4789	1.94943	8.70848e-17	1.57654	125.653	0.96156	87.781	86.1085	4.893	16.2415	1560.66
BVC	Both	Mat=-1	Pht=-1	Yld=110	Gpc=1	w(-1,-1,110,1)	CC1=c(0,0,1,0)	Yield	-1.74001	-7.55145	1.9663e-16	0.069434	9.36089	0.0948147	87.279	76.7015	4.767	14.6375	-149.406
BVC	Both	Mat=-1	Pht=-1	Yld=110	Gpc=10	w(-1,-1,110,10)	CC1=c(0,0,1,0)	Yield	-2.04948	-1.9992	1.41729e-15	1.33229	17.3716	0.195779	87.683	81.379	4.8985	15.9805	40.4357
BVC	Both	Mat=-1	Pht=-1	Yld=110	Gpc=20	w(-1,-1,110,20)	CC1=c(0,0,1,0)	Yield	-1.79149	0.164042	-1.71767e-16	1.51125	31.8525	0.391955	87.777	83.894	4.9025	16.1655	256.686
BVC	Both	Mat=-1	Pht=-1	Yld=110	Gpc=30	w(-1,-1,110,30)	CC1=c(0,0,1,0)	Yield	-1.66387	0.95732	-2.31862e-16	1.54958	47.1938	0.599778	87.837	84.2845	4.906	16.179	473.657
BVC	Both	Mat=-1	Pht=-1	Yld=110	Gpc=40	w(-1,-1,110,40)	CC1=c(0,0,1,0)	Yield	-1.59294	1.35633	1.74332e-16	1.56328	62.7678	0.770582	87.6075	86.0245	4.886	16.2475	690.911
BVC	Both	Mat=-1	Pht=-1	Yld=110	Gpc=50	w(-1,-1,110,50)	CC1=c(0,0,1,0)	Yield	-1.54834	1.59478	0	1.56965	78.436	0.880542	87.6075	86.0245	4.886	16.2475	908.337
BVC	Both	Mat=-1	Pht=-1	Yld=110	Gpc=60	w(-1,-1,110,60)	CC1=c(0,0,1,0)	Yield	-1.51784	1.75295	1.16222e-16	1.57311	94.1514	0.937272	87.6075	86.0245	4.886	16.2475	1125.76
BVC	Both	Mat=-1	Pht=-1	Yld=110	Gpc=70	w(-1,-1,110,70)	CC1=c(0,0,1,0)	Yield	-1.4957	1.86542	0	1.57519	109.894	0.960036	87.781	86.1085	4.893	16.2415	1343.2
BVC	Both	Mat=-1	Pht=-1	Yld=110	Gpc=80	w(-1,-1,110,80)	CC1=c(0,0,1,0)	Yield	-1.4789	1.94943	0	1.57654	125.653	0.964522	87.781	86.1085	4.893	16.2415	1560.66
BVC	Both	Mat=-1	Pht=-1	Yld=120	Gpc=1	w(-1,-1,120,1)	CC1=c(0,0,1,0)	Yield	-1.74001	-7.55145	2.77627e-15	0.069434	9.36089	0.0871074	87.279	76.7015	4.767	14.6375	-149.406
BVC	Both	Mat=-1	Pht=-1	Yld=120	Gpc=10	w(-1,-1,120,10)	CC1=c(0,0,1,0)	Yield	-2.04948	-1.9992	1.41729e-15	1.33229	17.3716	0.178466	87.683	81.379	4.8985	15.9805	40.4357
BVC	Both	Mat=-1	Pht=-1	Yld=120	Gpc=20	w(-1,-1,120,20)	CC1=c(0,0,1,0)	Yield	-1.79149	0.164042	7.72954e-16	1.51125	31.8525	0.356479	87.777	83.894	4.9025	16.1655	256.686
BVC	Both	Mat=-1	Pht=-1	Yld=120	Gpc=30	w(-1,-1,120,30)	CC1=c(0,0,1,0)	Yield	-1.66387	0.95732	5.79654e-16	1.54958	47.1938	0.550499	87.837	84.2845	4.906	16.179	473.657
BVC	Both	Mat=-1	Pht=-1	Yld=120	Gpc=40	w(-1,-1,120,40)	CC1=c(0,0,1,0)	Yield	-1.59294	1.35633	1.74332e-16	1.56328	62.7678	0.721362	87.6075	86.0245	4.886	16.2475	690.911
BVC	Both	Mat=-1	Pht=-1	Yld=120	Gpc=50	w(-1,-1,120,50)	CC1=c(0,0,1,0)	Yield	-1.54834	1.59478	1.39508e-16	1.56965	78.436	0.843385	87.6075	86.0245	4.886	16.2475	908.337	selected at GPC = 1
BVC	Both	Mat=-1	Pht=-1	Yld=120	Gpc=60	w(-1,-1,120,60)	CC1=c(0,0,1,0)	Yield	-1.51784	1.75295	0	1.57311	94.1514	0.915191	87.6075	86.0245	4.886	16.2475	1125.76
BVC	Both	Mat=-1	Pht=-1	Yld=120	Gpc=70	w(-1,-1,120,70)	CC1=c(0,0,1,0)	Yield	-1.4957	1.86542	9.95731e-17	1.57519	109.894	0.950258	87.781	86.1085	4.893	16.2415	1343.2	Selected at Yld = 1
BVC	Both	Mat=-1	Pht=-1	Yld=120	Gpc=80	w(-1,-1,120,80)	CC1=c(0,0,1,0)	Yield	-1.4789	1.94943	0	1.57654	125.653	0.963125	87.781	86.1085	4.893	16.2415	1560.66
BVC	Both	Mat=-1	Pht=-1	Yld=130	Gpc=1	w(-1,-1,130,1)	CC1=c(0,0,1,0)	Yield	-1.74001	-7.55145	2.92238e-15	0.069434	9.36089	0.0805548	87.279	76.7015	4.767	14.6375	-149.406
BVC	Both	Mat=-1	Pht=-1	Yld=130	Gpc=10	w(-1,-1,130,10)	CC1=c(0,0,1,0)	Yield	-2.04948	-1.9992	1.49603e-15	1.33229	17.3716	0.163924	87.683	81.379	4.8985	15.9805	40.4357
BVC	Both	Mat=-1	Pht=-1	Yld=130	Gpc=20	w(-1,-1,130,20)	CC1=c(0,0,1,0)	Yield	-1.79149	0.164042	7.72954e-16	1.51125	31.8525	0.326494	87.777	83.894	4.9025	16.1655	256.686
BVC	Both	Mat=-1	Pht=-1	Yld=130	Gpc=30	w(-1,-1,130,30)	CC1=c(0,0,1,0)	Yield	-1.66387	0.95732	4.63724e-16	1.54958	47.1938	0.507092	87.837	84.2845	4.906	16.179	473.657
BVC	Both	Mat=-1	Pht=-1	Yld=130	Gpc=40	w(-1,-1,130,40)	CC1=c(0,0,1,0)	Yield	-1.59294	1.35633	4.3583e-16	1.56328	62.7678	0.674432	87.6075	86.0245	4.886	16.2475	690.911
BVC	Both	Mat=-1	Pht=-1	Yld=130	Gpc=50	w(-1,-1,130,50)	CC1=c(0,0,1,0)	Yield	-1.54834	1.59478	6.9754e-17	1.56965	78.436	0.803982	87.6075	86.0245	4.886	16.2475	908.337	selected at GPC = 1
BVC	Both	Mat=-1	Pht=-1	Yld=130	Gpc=60	w(-1,-1,130,60)	CC1=c(0,0,1,0)	Yield	-1.51784	1.75295	2.32444e-16	1.57311	94.1514	0.888445	87.6075	86.0245	4.886	16.2475	1125.76
BVC	Both	Mat=-1	Pht=-1	Yld=130	Gpc=70	w(-1,-1,130,70)	CC1=c(0,0,1,0)	Yield	-1.4957	1.86542	9.95731e-17	1.57519	109.894	0.935509	87.781	86.1085	4.893	16.2415	1343.2	Selected at Yld = 1
BVC	Both	Mat=-1	Pht=-1	Yld=130	Gpc=80	w(-1,-1,130,80)	CC1=c(0,0,1,0)	Yield	-1.4789	1.94943	0	1.57654	125.653	0.957424	87.781	86.1085	4.893	16.2415	1560.66
BVC	Both	Mat=-1	Pht=-1	Yld=140	Gpc=1	w(-1,-1,140,1)	CC1=c(0,0,1,0)	Yield	-1.74001	-7.55145	-1.53425e-15	0.069434	9.36089	0.0749162	87.279	76.7015	4.767	14.6375	-149.406
BVC	Both	Mat=-1	Pht=-1	Yld=140	Gpc=10	w(-1,-1,140,10)	CC1=c(0,0,1,0)	Yield	-2.04948	-1.9992	-8.26751e-16	1.33229	17.3716	0.151545	87.683	81.379	4.8985	15.9805	40.4357
BVC	Both	Mat=-1	Pht=-1	Yld=140	Gpc=20	w(-1,-1,140,20)	CC1=c(0,0,1,0)	Yield	-1.79149	0.164042	8.58837e-16	1.51125	31.8525	0.300901	87.777	83.894	4.9025	16.1655	256.686
BVC	Both	Mat=-1	Pht=-1	Yld=140	Gpc=30	w(-1,-1,140,30)	CC1=c(0,0,1,0)	Yield	-1.66387	0.95732	4.63724e-16	1.54958	47.1938	0.468954	87.837	84.2845	4.906	16.179	473.657
BVC	Both	Mat=-1	Pht=-1	Yld=140	Gpc=40	w(-1,-1,140,40)	CC1=c(0,0,1,0)	Yield	-1.59294	1.35633	3.48664e-16	1.56328	62.7678	0.630652	87.6075	86.0245	4.886	16.2475	690.911
BVC	Both	Mat=-1	Pht=-1	Yld=140	Gpc=50	w(-1,-1,140,50)	CC1=c(0,0,1,0)	Yield	-1.54834	1.59478	6.9754e-17	1.56965	78.436	0.763989	87.6075	86.0245	4.886	16.2475	908.337
BVC	Both	Mat=-1	Pht=-1	Yld=140	Gpc=60	w(-1,-1,140,60)	CC1=c(0,0,1,0)	Yield	-1.51784	1.75295	2.32444e-16	1.57311	94.1514	0.858368	87.6075	86.0245	4.886	16.2475	1125.76
BVC	Both	Mat=-1	Pht=-1	Yld=140	Gpc=70	w(-1,-1,140,70)	CC1=c(0,0,1,0)	Yield	-1.4957	1.86542	9.95731e-17	1.57519	109.894	0.916477	87.781	86.1085	4.893	16.2415	1343.2
BVC	Both	Mat=-1	Pht=-1	Yld=140	Gpc=80	w(-1,-1,140,80)	CC1=c(0,0,1,0)	Yield	-1.4789	1.94943	8.70848e-17	1.57654	125.653	0.947646	87.781	86.1085	4.893	16.2415	1560.66
BVC	Both	Mat=-1	Pht=-1	Yld=150	Gpc=1	w(-1,-1,150,1)	CC1=c(0,0,1,0)	Yield	-1.74001	-7.55145	3.4338e-15	0.069434	9.36089	0.0700134	87.279	76.7015	4.767	14.6375	-149.406
BVC	Both	Mat=-1	Pht=-1	Yld=150	Gpc=10	w(-1,-1,150,10)	CC1=c(0,0,1,0)	Yield	-2.04948	-1.9992	1.81098e-15	1.33229	17.3716	0.140885	87.683	81.379	4.8985	15.9805	40.4357
BVC	Both	Mat=-1	Pht=-1	Yld=150	Gpc=20	w(-1,-1,150,20)	CC1=c(0,0,1,0)	Yield	-1.79149	0.164042	1.0306e-15	1.51125	31.8525	0.278856	87.777	83.894	4.9025	16.1655	256.686
BVC	Both	Mat=-1	Pht=-1	Yld=150	Gpc=30	w(-1,-1,150,30)	CC1=c(0,0,1,0)	Yield	-1.66387	0.95732	5.79654e-16	1.54958	47.1938	0.435419	87.837	84.2845	4.906	16.179	473.657
BVC	Both	Mat=-1	Pht=-1	Yld=150	Gpc=40	w(-1,-1,150,40)	CC1=c(0,0,1,0)	Yield	-1.59294	1.35633	4.3583e-16	1.56328	62.7678	0.590359	87.6075	86.0245	4.886	16.2475	690.911
BVC	Both	Mat=-1	Pht=-1	Yld=150	Gpc=50	w(-1,-1,150,50)	CC1=c(0,0,1,0)	Yield	-1.54834	1.59478	-7.05758e-17	1.56965	78.436	0.724616	87.6075	86.0245	4.886	16.2475	908.337	selected at GPC = 1
BVC	Both	Mat=-1	Pht=-1	Yld=150	Gpc=60	w(-1,-1,150,60)	CC1=c(0,0,1,0)	Yield	-1.51784	1.75295	-1.16222e-16	1.57311	94.1514	0.826209	87.6075	86.0245	4.886	16.2475	1125.76
BVC	Both	Mat=-1	Pht=-1	Yld=150	Gpc=70	w(-1,-1,150,70)	CC1=c(0,0,1,0)	Yield	-1.4957	1.86542	-9.95731e-17	1.57519	109.894	0.893972	87.781	86.1085	4.893	16.2415	1343.2	Selected at Yld = 1
BVC	Both	Mat=-1	Pht=-1	Yld=150	Gpc=80	w(-1,-1,150,80)	CC1=c(0,0,1,0)	Yield	-1.4789	1.94943	0	1.57654	125.653	0.93416	87.781	86.1085	4.893	16.2415	1560.66
BVC	Both	Mat=-1	Pht=-5	Yld=1	Gpc=1	w(-1,-5,1,1)	CC1=c(0,0,1,0)	Yield	-0.200635	-8.69882	2.05135e-16	-0.353749	43.341	0.82655	88.5165	75.3665	4.8305	14.254	-568.424
BVC	Both	Mat=-1	Pht=-5	Yld=1	Gpc=10	w(-1,-5,1,10)	CC1=c(0,0,1,0)	Yield	-0.659314	-8.02783	2.57565e-16	0.168583	42.4843	0.903186	88.619	76.084	4.803	14.9545	-387.05
BVC	Both	Mat=-1	Pht=-5	Yld=1	Gpc=20	w(-1,-5,1,20)	CC1=c(0,0,1,0)	Yield	-1.05519	-6.42231	1.45872e-17	0.685853	46.8838	0.951197	88.88	77.074	4.867	15.3965	-179.648
BVC	Both	Mat=-1	Pht=-5	Yld=1	Gpc=30	w(-1,-5,1,30)	CC1=c(0,0,1,0)	Yield	-1.2758	-4.69707	-9.8407e-17	1.02789	55.5979	0.939439	88.747	78.733	4.877	15.743	31.863
BVC	Both	Mat=-1	Pht=-5	Yld=1	Gpc=40	w(-1,-5,1,40)	CC1=c(0,0,1,0)	Yield	-1.37976	-3.30322	-8.17052e-17	1.22668	66.9629	0.908576	88.4635	79.7275	4.937	15.837	245.372
BVC	Both	Mat=-1	Pht=-5	Yld=1	Gpc=50	w(-1,-5,1,50)	CC1=c(0,0,1,0)	Yield	-1.42576	-2.2696	0	1.34162	79.8549	0.880915	88.5095	80.231	4.9085	15.921	460.023
BVC	Both	Mat=-1	Pht=-5	Yld=1	Gpc=60	w(-1,-5,1,60)	CC1=c(0,0,1,0)	Yield	-1.44497	-1.50872	1.1685e-16	1.41095	93.6453	0.859919	88.2415	81.5315	4.867	16.068	675.083
BVC	Both	Mat=-1	Pht=-5	Yld=1	Gpc=70	w(-1,-5,1,70)	CC1=c(0,0,1,0)	Yield	-1.45175	-0.938322	0	1.45496	107.99	0.844364	88.4045	82.013	4.9205	16.056	891.023
BVC	Both	Mat=-1	Pht=-5	Yld=1	Gpc=80	w(-1,-5,1,80)	CC1=c(0,0,1,0)	Yield	-1.45266	-0.500223	1.78367e-16	1.48428	122.696	0.832692	88.2615	82.9285	4.909	16.125	1107.37
BVC	Both	Mat=-1	Pht=-5	Yld=10	Gpc=1	w(-1,-5,10,1)	CC1=c(0,0,1,0)	Yield	-0.200635	-8.69882	2.70225e-16	-0.353749	43.341	0.763396	88.5165	75.3665	4.8305	14.254	-568.424
BVC	Both	Mat=-1	Pht=-5	Yld=10	Gpc=10	w(-1,-5,10,10)	CC1=c(0,0,1,0)	Yield	-0.659314	-8.02783	0	0.168583	42.4843	0.848548	88.619	76.084	4.803	14.9545	-387.05
BVC	Both	Mat=-1	Pht=-5	Yld=10	Gpc=20	w(-1,-5,10,20)	CC1=c(0,0,1,0)	Yield	-1.05519	-6.42231	1.75046e-16	0.685853	46.8838	0.933215	88.88	77.074	4.867	15.3965	-179.648
BVC	Both	Mat=-1	Pht=-5	Yld=10	Gpc=30	w(-1,-5,10,30)	CC1=c(0,0,1,0)	Yield	-1.2758	-4.69707	-9.8407e-17	1.02789	55.5979	0.953854	88.747	78.733	4.877	15.743	31.863
BVC	Both	Mat=-1	Pht=-5	Yld=10	Gpc=40	w(-1,-5,10,40)	CC1=c(0,0,1,0)	Yield	-1.37976	-3.30322	8.17052e-17	1.22668	66.9629	0.935179	88.4635	79.7275	4.937	15.837	245.372
BVC	Both	Mat=-1	Pht=-5	Yld=10	Gpc=50	w(-1,-5,10,50)	CC1=c(0,0,1,0)	Yield	-1.42576	-2.2696	1.37029e-16	1.34162	79.8549	0.909253	88.5095	80.231	4.9085	15.921	460.023
BVC	Both	Mat=-1	Pht=-5	Yld=10	Gpc=60	w(-1,-5,10,60)	CC1=c(0,0,1,0)	Yield	-1.44497	-1.50872	-1.1685e-16	1.41095	93.6453	0.886631	88.2415	81.5315	4.867	16.068	675.083
BVC	Both	Mat=-1	Pht=-5	Yld=10	Gpc=70	w(-1,-5,10,70)	CC1=c(0,0,1,0)	Yield	-1.45175	-0.938322	1.01328e-16	1.45496	107.99	0.868693	88.4045	82.013	4.9205	16.056	891.023
BVC	Both	Mat=-1	Pht=-5	Yld=10	Gpc=80	w(-1,-5,10,80)	CC1=c(0,0,1,0)	Yield	-1.45266	-0.500223	0	1.48428	122.696	0.854685	88.2615	82.9285	4.909	16.125	1107.37
BVC	Both	Mat=-1	Pht=-5	Yld=20	Gpc=1	w(-1,-5,20,1)	CC1=c(0,0,1,0)	Yield	-0.200635	-8.69882	-1.26237e-16	-0.353749	43.341	0.694371	88.5165	75.3665	4.8305	14.254	-568.424
BVC	Both	Mat=-1	Pht=-5	Yld=20	Gpc=10	w(-1,-5,20,10)	CC1=c(0,0,1,0)	Yield	-0.659314	-8.02783	2.8976e-16	0.168583	42.4843	0.778278	88.619	76.084	4.803	14.9545	-387.05
BVC	Both	Mat=-1	Pht=-5	Yld=20	Gpc=20	w(-1,-5,20,20)	CC1=c(0,0,1,0)	Yield	-1.05519	-6.42231	1.75046e-16	0.685853	46.8838	0.889956	88.88	77.074	4.867	15.3965	-179.648
BVC	Both	Mat=-1	Pht=-5	Yld=20	Gpc=30	w(-1,-5,20,30)	CC1=c(0,0,1,0)	Yield	-1.2758	-4.69707	7.38052e-17	1.02789	55.5979	0.94973	88.747	78.733	4.877	15.743	31.863
BVC	Both	Mat=-1	Pht=-5	Yld=20	Gpc=40	w(-1,-5,20,40)	CC1=c(0,0,1,0)	Yield	-1.37976	-3.30322	-4.08526e-17	1.22668	66.9629	0.953215	88.4635	79.7275	4.937	15.837	245.372
BVC	Both	Mat=-1	Pht=-5	Yld=20	Gpc=50	w(-1,-5,20,50)	CC1=c(0,0,1,0)	Yield	-1.42576	-2.2696	1.37029e-16	1.34162	79.8549	0.934681	88.5095	80.231	4.9085	15.921	460.023
BVC	Both	Mat=-1	Pht=-5	Yld=20	Gpc=60	w(-1,-5,20,60)	CC1=c(0,0,1,0)	Yield	-1.44497	-1.50872	0	1.41095	93.6453	0.913028	88.2415	81.5315	4.867	16.068	675.083
BVC	Both	Mat=-1	Pht=-5	Yld=20	Gpc=70	w(-1,-5,20,70)	CC1=c(0,0,1,0)	Yield	-1.45175	-0.938322	1.01328e-16	1.45496	107.99	0.893845	88.4045	82.013	4.9205	16.056	891.023
BVC	Both	Mat=-1	Pht=-5	Yld=20	Gpc=80	w(-1,-5,20,80)	CC1=c(0,0,1,0)	Yield	-1.45266	-0.500223	8.91834e-17	1.48428	122.696	0.877983	88.2615	82.9285	4.909	16.125	1107.37
BVC	Both	Mat=-1	Pht=-5	Yld=30	Gpc=1	w(-1,-5,30,1)	CC1=c(0,0,1,0)	Yield	-0.200635	-8.69882	2.07107e-16	-0.353749	43.341	0.630677	88.5165	75.3665	4.8305	14.254	-568.424
BVC	Both	Mat=-1	Pht=-5	Yld=30	Gpc=10	w(-1,-5,30,10)	CC1=c(0,0,1,0)	Yield	-0.659314	-8.02783	2.8976e-16	0.168583	42.4843	0.707394	88.619	76.084	4.803	14.9545	-387.05
BVC	Both	Mat=-1	Pht=-5	Yld=30	Gpc=20	w(-1,-5,30,20)	CC1=c(0,0,1,0)	Yield	-1.05519	-6.42231	3.50093e-16	0.685853	46.8838	0.831317	88.88	77.074	4.867	15.3965	-179.648
BVC	Both	Mat=-1	Pht=-5	Yld=30	Gpc=30	w(-1,-5,30,30)	CC1=c(0,0,1,0)	Yield	-1.2758	-4.69707	1.96814e-16	1.02789	55.5979	0.925272	88.747	78.733	4.877	15.743	31.863
BVC	Both	Mat=-1	Pht=-5	Yld=30	Gpc=40	w(-1,-5,30,40)	CC1=c(0,0,1,0)	Yield	-1.37976	-3.30322	8.17052e-17	1.22668	66.9629	0.956925	88.4635	79.7275	4.937	15.837	245.372
BVC	Both	Mat=-1	Pht=-5	Yld=30	Gpc=50	w(-1,-5,30,50)	CC1=c(0,0,1,0)	Yield	-1.42576	-2.2696	1.37029e-16	1.34162	79.8549	0.951783	88.5095	80.231	4.9085	15.921	460.023
BVC	Both	Mat=-1	Pht=-5	Yld=30	Gpc=60	w(-1,-5,30,60)	CC1=c(0,0,1,0)	Yield	-1.44497	-1.50872	0	1.41095	93.6453	0.93468	88.2415	81.5315	4.867	16.068	675.083
BVC	Both	Mat=-1	Pht=-5	Yld=30	Gpc=70	w(-1,-5,30,70)	CC1=c(0,0,1,0)	Yield	-1.45175	-0.938322	1.01328e-16	1.45496	107.99	0.916196	88.4045	82.013	4.9205	16.056	891.023
BVC	Both	Mat=-1	Pht=-5	Yld=30	Gpc=80	w(-1,-5,30,80)	CC1=c(0,0,1,0)	Yield	-1.45266	-0.500223	6.84832e-18	1.48428	122.696	0.89955	88.2615	82.9285	4.909	16.125	1107.37
BVC	Both	Mat=-1	Pht=-5	Yld=40	Gpc=1	w(-1,-5,40,1)	CC1=c(0,0,1,0)	Yield	-0.200635	-8.69882	-1.89355e-16	-0.353749	43.341	0.573899	88.5165	75.3665	4.8305	14.254	-568.424
BVC	Both	Mat=-1	Pht=-5	Yld=40	Gpc=10	w(-1,-5,40,10)	CC1=c(0,0,1,0)	Yield	-0.659314	-8.02783	2.57565e-16	0.168583	42.4843	0.641351	88.619	76.084	4.803	14.9545	-387.05
BVC	Both	Mat=-1	Pht=-5	Yld=40	Gpc=20	w(-1,-5,40,20)	CC1=c(0,0,1,0)	Yield	-1.05519	-6.42231	2.91744e-16	0.685853	46.8838	0.766637	88.88	77.074	4.867	15.3965	-179.648
BVC	Both	Mat=-1	Pht=-5	Yld=40	Gpc=30	w(-1,-5,40,30)	CC1=c(0,0,1,0)	Yield	-1.2758	-4.69707	1.96814e-16	1.02789	55.5979	0.884833	88.747	78.733	4.877	15.743	31.863
BVC	Both	Mat=-1	Pht=-5	Yld=40	Gpc=40	w(-1,-5,40,40)	CC1=c(0,0,1,0)	Yield	-1.37976	-3.30322	1.22558e-16	1.22668	66.9629	0.945806	88.4635	79.7275	4.937	15.837	245.372
BVC	Both	Mat=-1	Pht=-5	Yld=40	Gpc=50	w(-1,-5,40,50)	CC1=c(0,0,1,0)	Yield	-1.42576	-2.2696	0	1.34162	79.8549	0.959027	88.5095	80.231	4.9085	15.921	460.023
BVC	Both	Mat=-1	Pht=-5	Yld=40	Gpc=60	w(-1,-5,40,60)	CC1=c(0,0,1,0)	Yield	-1.44497	-1.50872	0	1.41095	93.6453	0.950321	88.2415	81.5315	4.867	16.068	675.083
BVC	Both	Mat=-1	Pht=-5	Yld=40	Gpc=70	w(-1,-5,40,70)	CC1=c(0,0,1,0)	Yield	-1.45175	-0.938322	1.01328e-16	1.45496	107.99	0.93487	88.4045	82.013	4.9205	16.056	891.023
BVC	Both	Mat=-1	Pht=-5	Yld=40	Gpc=80	w(-1,-5,40,80)	CC1=c(0,0,1,0)	Yield	-1.45266	-0.500223	0	1.48428	122.696	0.918797	88.2615	82.9285	4.909	16.125	1107.37
BVC	Both	Mat=-1	Pht=-5	Yld=50	Gpc=1	w(-1,-5,50,1)	CC1=c(0,0,1,0)	Yield	-0.200635	-8.69882	5.85817e-16	-0.353749	43.341	0.524124	88.5165	75.3665	4.8305	14.254	-568.424
BVC	Both	Mat=-1	Pht=-5	Yld=50	Gpc=10	w(-1,-5,50,10)	CC1=c(0,0,1,0)	Yield	-0.659314	-8.02783	-2.57565e-16	0.168583	42.4843	0.5823	88.619	76.084	4.803	14.9545	-387.05
BVC	Both	Mat=-1	Pht=-5	Yld=50	Gpc=20	w(-1,-5,50,20)	CC1=c(0,0,1,0)	Yield	-1.05519	-6.42231	4.08441e-16	0.685853	46.8838	0.702558	88.88	77.074	4.867	15.3965	-179.648
BVC	Both	Mat=-1	Pht=-5	Yld=50	Gpc=30	w(-1,-5,50,30)	CC1=c(0,0,1,0)	Yield	-1.2758	-4.69707	9.8407e-17	1.02789	55.5979	0.834411	88.747	78.733	4.877	15.743	31.863
BVC	Both	Mat=-1	Pht=-5	Yld=50	Gpc=40	w(-1,-5,50,40)	CC1=c(0,0,1,0)	Yield	-1.37976	-3.30322	1.6341e-16	1.22668	66.9629	0.921335	88.4635	79.7275	4.937	15.837	245.372
BVC	Both	Mat=-1	Pht=-5	Yld=50	Gpc=50	w(-1,-5,50,50)	CC1=c(0,0,1,0)	Yield	-1.42576	-2.2696	1.37029e-16	1.34162	79.8549	0.955721	88.5095	80.231	4.9085	15.921	460.023
BVC	Both	Mat=-1	Pht=-5	Yld=50	Gpc=60	w(-1,-5,50,60)	CC1=c(0,0,1,0)	Yield	-1.44497	-1.50872	1.1685e-16	1.41095	93.6453	0.958937	88.2415	81.5315	4.867	16.068	675.083
BVC	Both	Mat=-1	Pht=-5	Yld=50	Gpc=70	w(-1,-5,50,70)	CC1=c(0,0,1,0)	Yield	-1.45175	-0.938322	2.02656e-16	1.45496	107.99	0.949039	88.4045	82.013	4.9205	16.056	891.023
BVC	Both	Mat=-1	Pht=-5	Yld=50	Gpc=80	w(-1,-5,50,80)	CC1=c(0,0,1,0)	Yield	-1.45266	-0.500223	0	1.48428	122.696	0.935122	88.2615	82.9285	4.909	16.125	1107.37
BVC	Both	Mat=-1	Pht=-5	Yld=60	Gpc=1	w(-1,-5,60,1)	CC1=c(0,0,1,0)	Yield	-0.200635	-8.69882	-2.52473e-16	-0.353749	43.341	0.480775	88.5165	75.3665	4.8305	14.254	-568.424
BVC	Both	Mat=-1	Pht=-5	Yld=60	Gpc=10	w(-1,-5,60,10)	CC1=c(0,0,1,0)	Yield	-0.659314	-8.02783	-1.93173e-16	0.168583	42.4843	0.530549	88.619	76.084	4.803	14.9545	-387.05
BVC	Both	Mat=-1	Pht=-5	Yld=60	Gpc=20	w(-1,-5,60,20)	CC1=c(0,0,1,0)	Yield	-1.05519	-6.42231	-1.0211e-16	0.685853	46.8838	0.642749	88.88	77.074	4.867	15.3965	-179.648
BVC	Both	Mat=-1	Pht=-5	Yld=60	Gpc=30	w(-1,-5,60,30)	CC1=c(0,0,1,0)	Yield	-1.2758	-4.69707	2.95221e-16	1.02789	55.5979	0.779651	88.747	78.733	4.877	15.743	31.863
BVC	Both	Mat=-1	Pht=-5	Yld=60	Gpc=40	w(-1,-5,60,40)	CC1=c(0,0,1,0)	Yield	-1.37976	-3.30322	-4.08526e-17	1.22668	66.9629	0.886461	88.4635	79.7275	4.937	15.837	245.372
BVC	Both	Mat=-1	Pht=-5	Yld=60	Gpc=50	w(-1,-5,60,50)	CC1=c(0,0,1,0)	Yield	-1.42576	-2.2696	2.74058e-16	1.34162	79.8549	0.942185	88.5095	80.231	4.9085	15.921	460.023
BVC	Both	Mat=-1	Pht=-5	Yld=60	Gpc=60	w(-1,-5,60,60)	CC1=c(0,0,1,0)	Yield	-1.44497	-1.50872	1.1685e-16	1.41095	93.6453	0.95993	88.2415	81.5315	4.867	16.068	675.083
BVC	Both	Mat=-1	Pht=-5	Yld=60	Gpc=70	w(-1,-5,60,70)	CC1=c(0,0,1,0)	Yield	-1.45175	-0.938322	1.01328e-16	1.45496	107.99	0.958015	88.4045	82.013	4.9205	16.056	891.023
BVC	Both	Mat=-1	Pht=-5	Yld=60	Gpc=80	w(-1,-5,60,80)	CC1=c(0,0,1,0)	Yield	-1.45266	-0.500223	8.91834e-17	1.48428	122.696	0.947963	88.2615	82.9285	4.909	16.125	1107.37
BVC	Both	Mat=-1	Pht=-5	Yld=70	Gpc=1	w(-1,-5,70,1)	CC1=c(0,0,1,0)	Yield	-0.200635	-8.69882	3.96462e-16	-0.353749	43.341	0.443055	88.5165	75.3665	4.8305	14.254	-568.424
BVC	Both	Mat=-1	Pht=-5	Yld=70	Gpc=10	w(-1,-5,70,10)	CC1=c(0,0,1,0)	Yield	-0.659314	-8.02783	5.15129e-16	0.168583	42.4843	0.485565	88.619	76.084	4.803	14.9545	-387.05
BVC	Both	Mat=-1	Pht=-5	Yld=70	Gpc=20	w(-1,-5,70,20)	CC1=c(0,0,1,0)	Yield	-1.05519	-6.42231	4.08441e-16	0.685853	46.8838	0.588723	88.88	77.074	4.867	15.3965	-179.648
BVC	Both	Mat=-1	Pht=-5	Yld=70	Gpc=30	w(-1,-5,70,30)	CC1=c(0,0,1,0)	Yield	-1.2758	-4.69707	-7.38052e-17	1.02789	55.5979	0.724753	88.747	78.733	4.877	15.743	31.863
BVC	Both	Mat=-1	Pht=-5	Yld=70	Gpc=40	w(-1,-5,70,40)	CC1=c(0,0,1,0)	Yield	-1.37976	-3.30322	2.45116e-16	1.22668	66.9629	0.844724	88.4635	79.7275	4.937	15.837	245.372
BVC	Both	Mat=-1	Pht=-5	Yld=70	Gpc=50	w(-1,-5,70,50)	CC1=c(0,0,1,0)	Yield	-1.42576	-2.2696	6.85145e-17	1.34162	79.8549	0.919668	88.5095	80.231	4.9085	15.921	460.023
BVC	Both	Mat=-1	Pht=-5	Yld=70	Gpc=60	w(-1,-5,70,60)	CC1=c(0,0,1,0)	Yield	-1.44497	-1.50872	0	1.41095	93.6453	0.953228	88.2415	81.5315	4.867	16.068	675.083
BVC	Both	Mat=-1	Pht=-5	Yld=70	Gpc=70	w(-1,-5,70,70)	CC1=c(0,0,1,0)	Yield	-1.45175	-0.938322	2.02656e-16	1.45496	107.99	0.961329	88.4045	82.013	4.9205	16.056	891.023
BVC	Both	Mat=-1	Pht=-5	Yld=70	Gpc=80	w(-1,-5,70,80)	CC1=c(0,0,1,0)	Yield	-1.45266	-0.500223	0	1.48428	122.696	0.956835	88.2615	82.9285	4.909	16.125	1107.37
BVC	Both	Mat=-1	Pht=-5	Yld=80	Gpc=1	w(-1,-5,80,1)	CC1=c(0,0,1,0)	Yield	-0.200635	-8.69882	5.89762e-16	-0.353749	43.341	0.410156	88.5165	75.3665	4.8305	14.254	-568.424
BVC	Both	Mat=-1	Pht=-5	Yld=80	Gpc=10	w(-1,-5,80,10)	CC1=c(0,0,1,0)	Yield	-0.659314	-8.02783	-2.57565e-16	0.168583	42.4843	0.446526	88.619	76.084	4.803	14.9545	-387.05
BVC	Both	Mat=-1	Pht=-5	Yld=80	Gpc=20	w(-1,-5,80,20)	CC1=c(0,0,1,0)	Yield	-1.05519	-6.42231	5.25139e-16	0.685853	46.8838	0.540744	88.88	77.074	4.867	15.3965	-179.648
BVC	Both	Mat=-1	Pht=-5	Yld=80	Gpc=30	w(-1,-5,80,30)	CC1=c(0,0,1,0)	Yield	-1.2758	-4.69707	3.93628e-16	1.02789	55.5979	0.672326	88.747	78.733	4.877	15.743	31.863
BVC	Both	Mat=-1	Pht=-5	Yld=80	Gpc=40	w(-1,-5,80,40)	CC1=c(0,0,1,0)	Yield	-1.37976	-3.30322	-3.71266e-18	1.22668	66.9629	0.799455	88.4635	79.7275	4.937	15.837	245.372
BVC	Both	Mat=-1	Pht=-5	Yld=80	Gpc=50	w(-1,-5,80,50)	CC1=c(0,0,1,0)	Yield	-1.42576	-2.2696	2.74058e-16	1.34162	79.8549	0.890055	88.5095	80.231	4.9085	15.921	460.023
BVC	Both	Mat=-1	Pht=-5	Yld=80	Gpc=60	w(-1,-5,80,60)	CC1=c(0,0,1,0)	Yield	-1.44497	-1.50872	1.1685e-16	1.41095	93.6453	0.939302	88.2415	81.5315	4.867	16.068	675.083
BVC	Both	Mat=-1	Pht=-5	Yld=80	Gpc=70	w(-1,-5,80,70)	CC1=c(0,0,1,0)	Yield	-1.45175	-0.938322	2.02656e-16	1.45496	107.99	0.958805	88.4045	82.013	4.9205	16.056	891.023
BVC	Both	Mat=-1	Pht=-5	Yld=80	Gpc=80	w(-1,-5,80,80)	CC1=c(0,0,1,0)	Yield	-1.45266	-0.500223	8.91834e-17	1.48428	122.696	0.961384	88.2615	82.9285	4.909	16.125	1107.37
BVC	Both	Mat=-1	Pht=-5	Yld=90	Gpc=1	w(-1,-5,90,1)	CC1=c(0,0,1,0)	Yield	-0.200635	-8.69882	5.86803e-16	-0.353749	43.341	0.381349	88.5165	75.3665	4.8305	14.254	-568.424
BVC	Both	Mat=-1	Pht=-5	Yld=90	Gpc=10	w(-1,-5,90,10)	CC1=c(0,0,1,0)	Yield	-0.659314	-8.02783	-2.57565e-16	0.168583	42.4843	0.412576	88.619	76.084	4.803	14.9545	-387.05
BVC	Both	Mat=-1	Pht=-5	Yld=90	Gpc=20	w(-1,-5,90,20)	CC1=c(0,0,1,0)	Yield	-1.05519	-6.42231	5.25139e-16	0.685853	46.8838	0.498464	88.88	77.074	4.867	15.3965	-179.648
BVC	Both	Mat=-1	Pht=-5	Yld=90	Gpc=30	w(-1,-5,90,30)	CC1=c(0,0,1,0)	Yield	-1.2758	-4.69707	2.95221e-16	1.02789	55.5979	0.623711	88.747	78.733	4.877	15.743	31.863
BVC	Both	Mat=-1	Pht=-5	Yld=90	Gpc=40	w(-1,-5,90,40)	CC1=c(0,0,1,0)	Yield	-1.37976	-3.30322	2.45116e-16	1.22668	66.9629	0.753312	88.4635	79.7275	4.937	15.837	245.372
BVC	Both	Mat=-1	Pht=-5	Yld=90	Gpc=50	w(-1,-5,90,50)	CC1=c(0,0,1,0)	Yield	-1.42576	-2.2696	2.74058e-16	1.34162	79.8549	0.855467	88.5095	80.231	4.9085	15.921	460.023
BVC	Both	Mat=-1	Pht=-5	Yld=90	Gpc=60	w(-1,-5,90,60)	CC1=c(0,0,1,0)	Yield	-1.44497	-1.50872	0	1.41095	93.6453	0.919076	88.2415	81.5315	4.867	16.068	675.083
BVC	Both	Mat=-1	Pht=-5	Yld=90	Gpc=70	w(-1,-5,90,70)	CC1=c(0,0,1,0)	Yield	-1.45175	-0.938322	2.02656e-16	1.45496	107.99	0.950578	88.4045	82.013	4.9205	16.056	891.023
BVC	Both	Mat=-1	Pht=-5	Yld=90	Gpc=80	w(-1,-5,90,80)	CC1=c(0,0,1,0)	Yield	-1.45266	-0.500223	0	1.48428	122.696	0.961421	88.2615	82.9285	4.909	16.125	1107.37
BVC	Both	Mat=-1	Pht=-5	Yld=100	Gpc=1	w(-1,-5,100,1)	CC1=c(0,0,1,0)	Yield	-0.200635	-8.69882	6.52881e-16	-0.353749	43.341	0.356003	88.5165	75.3665	4.8305	14.254	-568.424
BVC	Both	Mat=-1	Pht=-5	Yld=100	Gpc=10	w(-1,-5,100,10)	CC1=c(0,0,1,0)	Yield	-0.659314	-8.02783	5.15129e-16	0.168583	42.4843	0.382934	88.619	76.084	4.803	14.9545	-387.05
BVC	Both	Mat=-1	Pht=-5	Yld=100	Gpc=20	w(-1,-5,100,20)	CC1=c(0,0,1,0)	Yield	-1.05519	-6.42231	4.08441e-16	0.685853	46.8838	0.461289	88.88	77.074	4.867	15.3965	-179.648
BVC	Both	Mat=-1	Pht=-5	Yld=100	Gpc=30	w(-1,-5,100,30)	CC1=c(0,0,1,0)	Yield	-1.2758	-4.69707	3.93628e-16	1.02789	55.5979	0.579409	88.747	78.733	4.877	15.743	31.863
BVC	Both	Mat=-1	Pht=-5	Yld=100	Gpc=40	w(-1,-5,100,40)	CC1=c(0,0,1,0)	Yield	-1.37976	-3.30322	-1.22558e-16	1.22668	66.9629	0.708157	88.4635	79.7275	4.937	15.837	245.372
BVC	Both	Mat=-1	Pht=-5	Yld=100	Gpc=50	w(-1,-5,100,50)	CC1=c(0,0,1,0)	Yield	-1.42576	-2.2696	0	1.34162	79.8549	0.817934	88.5095	80.231	4.9085	15.921	460.023
BVC	Both	Mat=-1	Pht=-5	Yld=100	Gpc=60	w(-1,-5,100,60)	CC1=c(0,0,1,0)	Yield	-1.44497	-1.50872	0	1.41095	93.6453	0.893767	88.2415	81.5315	4.867	16.068	675.083
BVC	Both	Mat=-1	Pht=-5	Yld=100	Gpc=70	w(-1,-5,100,70)	CC1=c(0,0,1,0)	Yield	-1.45175	-0.938322	0	1.45496	107.99	0.937079	88.4045	82.013	4.9205	16.056	891.023
BVC	Both	Mat=-1	Pht=-5	Yld=100	Gpc=80	w(-1,-5,100,80)	CC1=c(0,0,1,0)	Yield	-1.45266	-0.500223	8.91834e-17	1.48428	122.696	0.956943	88.2615	82.9285	4.909	16.125	1107.37
BVC	Both	Mat=-1	Pht=-5	Yld=110	Gpc=1	w(-1,-5,110,1)	CC1=c(0,0,1,0)	Yield	-0.200635	-8.69882	6.55839e-16	-0.353749	43.341	0.333589	88.5165	75.3665	4.8305	14.254	-568.424
BVC	Both	Mat=-1	Pht=-5	Yld=110	Gpc=10	w(-1,-5,110,10)	CC1=c(0,0,1,0)	Yield	-0.659314	-8.02783	7.08303e-16	0.168583	42.4843	0.356927	88.619	76.084	4.803	14.9545	-387.05
BVC	Both	Mat=-1	Pht=-5	Yld=110	Gpc=20	w(-1,-5,110,20)	CC1=c(0,0,1,0)	Yield	-1.05519	-6.42231	-2.18808e-16	0.685853	46.8838	0.428573	88.88	77.074	4.867	15.3965	-179.648
BVC	Both	Mat=-1	Pht=-5	Yld=110	Gpc=30	w(-1,-5,110,30)	CC1=c(0,0,1,0)	Yield	-1.2758	-4.69707	4.92035e-16	1.02789	55.5979	0.539425	88.747	78.733	4.877	15.743	31.863
BVC	Both	Mat=-1	Pht=-5	Yld=110	Gpc=40	w(-1,-5,110,40)	CC1=c(0,0,1,0)	Yield	-1.37976	-3.30322	3.26821e-16	1.22668	66.9629	0.665144	88.4635	79.7275	4.937	15.837	245.372
BVC	Both	Mat=-1	Pht=-5	Yld=110	Gpc=50	w(-1,-5,110,50)	CC1=c(0,0,1,0)	Yield	-1.42576	-2.2696	4.11087e-16	1.34162	79.8549	0.779167	88.5095	80.231	4.9085	15.921	460.023
BVC	Both	Mat=-1	Pht=-5	Yld=110	Gpc=60	w(-1,-5,110,60)	CC1=c(0,0,1,0)	Yield	-1.44497	-1.50872	0	1.41095	93.6453	0.864706	88.2415	81.5315	4.867	16.068	675.083
BVC	Both	Mat=-1	Pht=-5	Yld=110	Gpc=70	w(-1,-5,110,70)	CC1=c(0,0,1,0)	Yield	-1.45175	-0.938322	-5.06639e-17	1.45496	107.99	0.918971	88.4045	82.013	4.9205	16.056	891.023
BVC	Both	Mat=-1	Pht=-5	Yld=110	Gpc=80	w(-1,-5,110,80)	CC1=c(0,0,1,0)	Yield	-1.45266	-0.500223	1.78367e-16	1.48428	122.696	0.948137	88.2615	82.9285	4.909	16.125	1107.37
BVC	Both	Mat=-1	Pht=-5	Yld=120	Gpc=1	w(-1,-5,120,1)	CC1=c(0,0,1,0)	Yield	-0.200635	-8.69882	7.16985e-16	-0.353749	43.341	0.313663	88.5165	75.3665	4.8305	14.254	-568.424
BVC	Both	Mat=-1	Pht=-5	Yld=120	Gpc=10	w(-1,-5,120,10)	CC1=c(0,0,1,0)	Yield	-0.659314	-8.02783	8.37085e-16	0.168583	42.4843	0.333986	88.619	76.084	4.803	14.9545	-387.05
BVC	Both	Mat=-1	Pht=-5	Yld=120	Gpc=20	w(-1,-5,120,20)	CC1=c(0,0,1,0)	Yield	-1.05519	-6.42231	7.00185e-16	0.685853	46.8838	0.3997	88.88	77.074	4.867	15.3965	-179.648
BVC	Both	Mat=-1	Pht=-5	Yld=120	Gpc=30	w(-1,-5,120,30)	CC1=c(0,0,1,0)	Yield	-1.2758	-4.69707	5.90442e-16	1.02789	55.5979	0.503509	88.747	78.733	4.877	15.743	31.863
BVC	Both	Mat=-1	Pht=-5	Yld=120	Gpc=40	w(-1,-5,120,40)	CC1=c(0,0,1,0)	Yield	-1.37976	-3.30322	4.08526e-16	1.22668	66.9629	0.624891	88.4635	79.7275	4.937	15.837	245.372
BVC	Both	Mat=-1	Pht=-5	Yld=120	Gpc=50	w(-1,-5,120,50)	CC1=c(0,0,1,0)	Yield	-1.42576	-2.2696	0	1.34162	79.8549	0.740486	88.5095	80.231	4.9085	15.921	460.023
BVC	Both	Mat=-1	Pht=-5	Yld=120	Gpc=60	w(-1,-5,120,60)	CC1=c(0,0,1,0)	Yield	-1.44497	-1.50872	-1.32e-17	1.41095	93.6453	0.833182	88.2415	81.5315	4.867	16.068	675.083
BVC	Both	Mat=-1	Pht=-5	Yld=120	Gpc=70	w(-1,-5,120,70)	CC1=c(0,0,1,0)	Yield	-1.45175	-0.938322	2.02656e-16	1.45496	107.99	0.897069	88.4045	82.013	4.9205	16.056	891.023
BVC	Both	Mat=-1	Pht=-5	Yld=120	Gpc=80	w(-1,-5,120,80)	CC1=c(0,0,1,0)	Yield	-1.45266	-0.500223	8.91834e-17	1.48428	122.696	0.935357	88.2615	82.9285	4.909	16.125	1107.37
BVC	Both	Mat=-1	Pht=-5	Yld=130	Gpc=1	w(-1,-5,130,1)	CC1=c(0,0,1,0)	Yield	-0.200635	-8.69882	7.80103e-16	-0.353749	43.341	0.295862	88.5165	75.3665	4.8305	14.254	-568.424
BVC	Both	Mat=-1	Pht=-5	Yld=130	Gpc=10	w(-1,-5,130,10)	CC1=c(0,0,1,0)	Yield	-0.659314	-8.02783	8.37085e-16	0.168583	42.4843	0.313643	88.619	76.084	4.803	14.9545	-387.05
BVC	Both	Mat=-1	Pht=-5	Yld=130	Gpc=20	w(-1,-5,130,20)	CC1=c(0,0,1,0)	Yield	-1.05519	-6.42231	-3.06331e-16	0.685853	46.8838	0.374126	88.88	77.074	4.867	15.3965	-179.648
BVC	Both	Mat=-1	Pht=-5	Yld=130	Gpc=30	w(-1,-5,130,30)	CC1=c(0,0,1,0)	Yield	-1.2758	-4.69707	4.92035e-16	1.02789	55.5979	0.471298	88.747	78.733	4.877	15.743	31.863
BVC	Both	Mat=-1	Pht=-5	Yld=130	Gpc=40	w(-1,-5,130,40)	CC1=c(0,0,1,0)	Yield	-1.37976	-3.30322	-1.22558e-16	1.22668	66.9629	0.587644	88.4635	79.7275	4.937	15.837	245.372
BVC	Both	Mat=-1	Pht=-5	Yld=130	Gpc=50	w(-1,-5,130,50)	CC1=c(0,0,1,0)	Yield	-1.42576	-2.2696	4.11087e-16	1.34162	79.8549	0.702816	88.5095	80.231	4.9085	15.921	460.023
BVC	Both	Mat=-1	Pht=-5	Yld=130	Gpc=60	w(-1,-5,130,60)	CC1=c(0,0,1,0)	Yield	-1.44497	-1.50872	1.1685e-16	1.41095	93.6453	0.800332	88.2415	81.5315	4.867	16.068	675.083
BVC	Both	Mat=-1	Pht=-5	Yld=130	Gpc=70	w(-1,-5,130,70)	CC1=c(0,0,1,0)	Yield	-1.45175	-0.938322	2.02656e-16	1.45496	107.99	0.872247	88.4045	82.013	4.9205	16.056	891.023
BVC	Both	Mat=-1	Pht=-5	Yld=130	Gpc=80	w(-1,-5,130,80)	CC1=c(0,0,1,0)	Yield	-1.45266	-0.500223	2.6755e-16	1.48428	122.696	0.919082	88.2615	82.9285	4.909	16.125	1107.37
BVC	Both	Mat=-1	Pht=-5	Yld=140	Gpc=1	w(-1,-5,140,1)	CC1=c(0,0,1,0)	Yield	-0.200635	-8.69882	9.0634e-16	-0.353749	43.341	0.27988	88.5165	75.3665	4.8305	14.254	-568.424
BVC	Both	Mat=-1	Pht=-5	Yld=140	Gpc=10	w(-1,-5,140,10)	CC1=c(0,0,1,0)	Yield	-0.659314	-8.02783	8.69281e-16	0.168583	42.4843	0.295507	88.619	76.084	4.803	14.9545	-387.05
BVC	Both	Mat=-1	Pht=-5	Yld=140	Gpc=20	w(-1,-5,140,20)	CC1=c(0,0,1,0)	Yield	-1.05519	-6.42231	-4.37616e-16	0.685853	46.8838	0.351376	88.88	77.074	4.867	15.3965	-179.648
BVC	Both	Mat=-1	Pht=-5	Yld=140	Gpc=30	w(-1,-5,140,30)	CC1=c(0,0,1,0)	Yield	-1.2758	-4.69707	4.92035e-16	1.02789	55.5979	0.442398	88.747	78.733	4.877	15.743	31.863
BVC	Both	Mat=-1	Pht=-5	Yld=140	Gpc=40	w(-1,-5,140,40)	CC1=c(0,0,1,0)	Yield	-1.37976	-3.30322	-2.45116e-16	1.22668	66.9629	0.553417	88.4635	79.7275	4.937	15.837	245.372
BVC	Both	Mat=-1	Pht=-5	Yld=140	Gpc=50	w(-1,-5,140,50)	CC1=c(0,0,1,0)	Yield	-1.42576	-2.2696	4.11087e-16	1.34162	79.8549	0.666759	88.5095	80.231	4.9085	15.921	460.023
BVC	Both	Mat=-1	Pht=-5	Yld=140	Gpc=60	w(-1,-5,140,60)	CC1=c(0,0,1,0)	Yield	-1.44497	-1.50872	1.1685e-16	1.41095	93.6453	0.76709	88.2415	81.5315	4.867	16.068	675.083
BVC	Both	Mat=-1	Pht=-5	Yld=140	Gpc=70	w(-1,-5,140,70)	CC1=c(0,0,1,0)	Yield	-1.45175	-0.938322	2.02656e-16	1.45496	107.99	0.84536	88.4045	82.013	4.9205	16.056	891.023
BVC	Both	Mat=-1	Pht=-5	Yld=140	Gpc=80	w(-1,-5,140,80)	CC1=c(0,0,1,0)	Yield	-1.45266	-0.500223	1.78367e-16	1.48428	122.696	0.899878	88.2615	82.9285	4.909	16.125	1107.37
BVC	Both	Mat=-1	Pht=-5	Yld=150	Gpc=1	w(-1,-5,150,1)	CC1=c(0,0,1,0)	Yield	-0.200635	-8.69882	-5.04947e-16	-0.353749	43.341	0.265467	88.5165	75.3665	4.8305	14.254	-568.424
BVC	Both	Mat=-1	Pht=-5	Yld=150	Gpc=10	w(-1,-5,150,10)	CC1=c(0,0,1,0)	Yield	-0.659314	-8.02783	8.04889e-16	0.168583	42.4843	0.27926	88.619	76.084	4.803	14.9545	-387.05
BVC	Both	Mat=-1	Pht=-5	Yld=150	Gpc=20	w(-1,-5,150,20)	CC1=c(0,0,1,0)	Yield	-1.05519	-6.42231	8.16883e-16	0.685853	46.8838	0.33105	88.88	77.074	4.867	15.3965	-179.648
BVC	Both	Mat=-1	Pht=-5	Yld=150	Gpc=30	w(-1,-5,150,30)	CC1=c(0,0,1,0)	Yield	-1.2758	-4.69707	5.90442e-16	1.02789	55.5979	0.416426	88.747	78.733	4.877	15.743	31.863
BVC	Both	Mat=-1	Pht=-5	Yld=150	Gpc=40	w(-1,-5,150,40)	CC1=c(0,0,1,0)	Yield	-1.37976	-3.30322	5.71937e-16	1.22668	66.9629	0.522088	88.4635	79.7275	4.937	15.837	245.372
BVC	Both	Mat=-1	Pht=-5	Yld=150	Gpc=50	w(-1,-5,150,50)	CC1=c(0,0,1,0)	Yield	-1.42576	-2.2696	-9.6995e-17	1.34162	79.8549	0.632656	88.5095	80.231	4.9085	15.921	460.023
BVC	Both	Mat=-1	Pht=-5	Yld=150	Gpc=60	w(-1,-5,150,60)	CC1=c(0,0,1,0)	Yield	-1.44497	-1.50872	2.337e-16	1.41095	93.6453	0.734174	88.2415	81.5315	4.867	16.068	675.083
BVC	Both	Mat=-1	Pht=-5	Yld=150	Gpc=70	w(-1,-5,150,70)	CC1=c(0,0,1,0)	Yield	-1.45175	-0.938322	2.02656e-16	1.45496	107.99	0.817188	88.4045	82.013	4.9205	16.056	891.023
BVC	Both	Mat=-1	Pht=-5	Yld=150	Gpc=80	w(-1,-5,150,80)	CC1=c(0,0,1,0)	Yield	-1.45266	-0.500223	1.78367e-16	1.48428	122.696	0.878343	88.2615	82.9285	4.909	16.125	1107.37
BVC	Both	Mat=-1	Pht=-10	Yld=1	Gpc=1	w(-1,-10,1,1)	CC1=c(0,0,1,0)	Yield	0.00913697	-8.73815	1.84312e-16	-0.406008	86.9663	0.813747	88.5165	75.3665	4.8305	14.254	-1091.69
BVC	Both	Mat=-1	Pht=-10	Yld=1	Gpc=10	w(-1,-10,1,10)	CC1=c(0,0,1,0)	Yield	-0.21933	-8.57378	2.4298e-16	-0.151767	84.4395	0.851373	88.5605	75.71	4.7975	14.629	-912.137
BVC	Both	Mat=-1	Pht=-10	Yld=1	Gpc=20	w(-1,-10,1,20)	CC1=c(0,0,1,0)	Yield	-0.473698	-8.10423	6.48236e-17	0.144288	84.4017	0.895194	88.619	76.084	4.803	14.9545	-708.991
BVC	Both	Mat=-1	Pht=-10	Yld=1	Gpc=30	w(-1,-10,1,30)	CC1=c(0,0,1,0)	Yield	-0.703991	-7.37951	1.88066e-16	0.425906	87.2763	0.930466	88.693	76.7515	4.8355	15.276	-502.849
BVC	Both	Mat=-1	Pht=-10	Yld=1	Gpc=40	w(-1,-10,1,40)	CC1=c(0,0,1,0)	Yield	-0.893415	-6.51022	1.17923e-16	0.66993	92.7928	0.948882	88.88	77.074	4.867	15.3965	-294.151
BVC	Both	Mat=-1	Pht=-10	Yld=1	Gpc=50	w(-1,-10,1,50)	CC1=c(0,0,1,0)	Yield	-1.03826	-5.61244	1.08861e-16	0.867094	100.517	0.950455	88.687	78.0345	4.898	15.6045	-83.5264
BVC	Both	Mat=-1	Pht=-10	Yld=1	Gpc=60	w(-1,-10,1,60)	CC1=c(0,0,1,0)	Yield	-1.14401	-4.76602	0	1.01969	109.986	0.940972	88.747	78.733	4.877	15.743	128.726
BVC	Both	Mat=-1	Pht=-10	Yld=1	Gpc=70	w(-1,-10,1,70)	CC1=c(0,0,1,0)	Yield	-1.21937	-4.00899	9.0592e-17	1.13541	120.788	0.926514	88.83	79.1585	4.9625	15.761	341.689
BVC	Both	Mat=-1	Pht=-10	Yld=1	Gpc=80	w(-1,-10,1,80)	CC1=c(0,0,1,0)	Yield	-1.2726	-3.35057	8.25226e-17	1.22276	132.599	0.910997	88.83	79.1585	4.9625	15.761	555.574
BVC	Both	Mat=-1	Pht=-10	Yld=10	Gpc=1	w(-1,-10,10,1)	CC1=c(0,0,1,0)	Yield	0.00913697	-8.73815	1.214e-16	-0.406008	86.9663	0.782301	88.5165	75.3665	4.8305	14.254	-1091.69
BVC	Both	Mat=-1	Pht=-10	Yld=10	Gpc=10	w(-1,-10,10,10)	CC1=c(0,0,1,0)	Yield	-0.21933	-8.57378	1.94384e-16	-0.151767	84.4395	0.820389	88.5605	75.71	4.7975	14.629	-912.137
BVC	Both	Mat=-1	Pht=-10	Yld=10	Gpc=20	w(-1,-10,10,20)	CC1=c(0,0,1,0)	Yield	-0.473698	-8.10423	-1.29647e-16	0.144288	84.4017	0.86838	88.619	76.084	4.803	14.9545	-708.991
BVC	Both	Mat=-1	Pht=-10	Yld=10	Gpc=30	w(-1,-10,10,30)	CC1=c(0,0,1,0)	Yield	-0.703991	-7.37951	3.13443e-17	0.425906	87.2763	0.912101	88.693	76.7515	4.8355	15.276	-502.849
BVC	Both	Mat=-1	Pht=-10	Yld=10	Gpc=40	w(-1,-10,10,40)	CC1=c(0,0,1,0)	Yield	-0.893415	-6.51022	7.37021e-17	0.66993	92.7928	0.941125	88.88	77.074	4.867	15.3965	-294.151
BVC	Both	Mat=-1	Pht=-10	Yld=10	Gpc=50	w(-1,-10,10,50)	CC1=c(0,0,1,0)	Yield	-1.03826	-5.61244	2.17723e-16	0.867094	100.517	0.952215	88.687	78.0345	4.898	15.6045	-83.5264
BVC	Both	Mat=-1	Pht=-10	Yld=10	Gpc=60	w(-1,-10,10,60)	CC1=c(0,0,1,0)	Yield	-1.14401	-4.76602	0	1.01969	109.986	0.949379	88.747	78.733	4.877	15.743	128.726
BVC	Both	Mat=-1	Pht=-10	Yld=10	Gpc=70	w(-1,-10,10,70)	CC1=c(0,0,1,0)	Yield	-1.21937	-4.00899	0	1.13541	120.788	0.938758	88.83	79.1585	4.9625	15.761	341.689
BVC	Both	Mat=-1	Pht=-10	Yld=10	Gpc=80	w(-1,-10,10,80)	CC1=c(0,0,1,0)	Yield	-1.2726	-3.35057	0	1.22276	132.599	0.925078	88.83	79.1585	4.9625	15.761	555.574
BVC	Both	Mat=-1	Pht=-10	Yld=20	Gpc=1	w(-1,-10,20,1)	CC1=c(0,0,1,0)	Yield	0.00913697	-8.73815	1.84804e-16	-0.406008	86.9663	0.747237	88.5165	75.3665	4.8305	14.254	-1091.69
BVC	Both	Mat=-1	Pht=-10	Yld=20	Gpc=10	w(-1,-10,20,10)	CC1=c(0,0,1,0)	Yield	-0.21933	-8.57378	1.29589e-16	-0.151767	84.4395	0.784636	88.5605	75.71	4.7975	14.629	-912.137
BVC	Both	Mat=-1	Pht=-10	Yld=20	Gpc=20	w(-1,-10,20,20)	CC1=c(0,0,1,0)	Yield	-0.473698	-8.10423	1.62059e-16	0.144288	84.4017	0.835191	88.619	76.084	4.803	14.9545	-708.991
BVC	Both	Mat=-1	Pht=-10	Yld=20	Gpc=30	w(-1,-10,20,30)	CC1=c(0,0,1,0)	Yield	-0.703991	-7.37951	2.50754e-16	0.425906	87.2763	0.886159	88.693	76.7515	4.8355	15.276	-502.849
BVC	Both	Mat=-1	Pht=-10	Yld=20	Gpc=40	w(-1,-10,20,40)	CC1=c(0,0,1,0)	Yield	-0.893415	-6.51022	1.17923e-16	0.66993	92.7928	0.925908	88.88	77.074	4.867	15.3965	-294.151
BVC	Both	Mat=-1	Pht=-10	Yld=20	Gpc=50	w(-1,-10,20,50)	CC1=c(0,0,1,0)	Yield	-1.03826	-5.61244	-6.80383e-17	0.867094	100.517	0.947954	88.687	78.0345	4.898	15.6045	-83.5264
BVC	Both	Mat=-1	Pht=-10	Yld=20	Gpc=60	w(-1,-10,20,60)	CC1=c(0,0,1,0)	Yield	-1.14401	-4.76602	1.9898e-16	1.01969	109.986	0.9537	88.747	78.733	4.877	15.743	128.726
BVC	Both	Mat=-1	Pht=-10	Yld=20	Gpc=70	w(-1,-10,20,70)	CC1=c(0,0,1,0)	Yield	-1.21937	-4.00899	9.0592e-17	1.13541	120.788	0.94864	88.83	79.1585	4.9625	15.761	341.689
BVC	Both	Mat=-1	Pht=-10	Yld=20	Gpc=80	w(-1,-10,20,80)	CC1=c(0,0,1,0)	Yield	-1.2726	-3.35057	-8.25226e-17	1.22276	132.599	0.938064	88.83	79.1585	4.9625	15.761	555.574
BVC	Both	Mat=-1	Pht=-10	Yld=30	Gpc=1	w(-1,-10,30,1)	CC1=c(0,0,1,0)	Yield	0.00913697	-8.73815	2.47716e-16	-0.406008	86.9663	0.712785	88.5165	75.3665	4.8305	14.254	-1091.69
BVC	Both	Mat=-1	Pht=-10	Yld=30	Gpc=10	w(-1,-10,30,10)	CC1=c(0,0,1,0)	Yield	-0.21933	-8.57378	-6.47946e-17	-0.151767	84.4395	0.748611	88.5605	75.71	4.7975	14.629	-912.137
BVC	Both	Mat=-1	Pht=-10	Yld=30	Gpc=20	w(-1,-10,30,20)	CC1=c(0,0,1,0)	Yield	-0.473698	-8.10423	-1.94471e-16	0.144288	84.4017	0.799948	88.619	76.084	4.803	14.9545	-708.991
BVC	Both	Mat=-1	Pht=-10	Yld=30	Gpc=30	w(-1,-10,30,30)	CC1=c(0,0,1,0)	Yield	-0.703991	-7.37951	1.25377e-16	0.425906	87.2763	0.855901	88.693	76.7515	4.8355	15.276	-502.849
BVC	Both	Mat=-1	Pht=-10	Yld=30	Gpc=40	w(-1,-10,30,40)	CC1=c(0,0,1,0)	Yield	-0.893415	-6.51022	-1.47404e-17	0.66993	92.7928	0.90471	88.88	77.074	4.867	15.3965	-294.151
BVC	Both	Mat=-1	Pht=-10	Yld=30	Gpc=50	w(-1,-10,30,50)	CC1=c(0,0,1,0)	Yield	-1.03826	-5.61244	-8.60311e-17	0.867094	100.517	0.937408	88.687	78.0345	4.898	15.6045	-83.5264
BVC	Both	Mat=-1	Pht=-10	Yld=30	Gpc=60	w(-1,-10,30,60)	CC1=c(0,0,1,0)	Yield	-1.14401	-4.76602	9.94898e-17	1.01969	109.986	0.952532	88.747	78.733	4.877	15.743	128.726
BVC	Both	Mat=-1	Pht=-10	Yld=30	Gpc=70	w(-1,-10,30,70)	CC1=c(0,0,1,0)	Yield	-1.21937	-4.00899	9.0592e-17	1.13541	120.788	0.954222	88.83	79.1585	4.9625	15.761	341.689
BVC	Both	Mat=-1	Pht=-10	Yld=30	Gpc=80	w(-1,-10,30,80)	CC1=c(0,0,1,0)	Yield	-1.2726	-3.35057	0	1.22276	132.599	0.94786	88.83	79.1585	4.9625	15.761	555.574
BVC	Both	Mat=-1	Pht=-10	Yld=40	Gpc=1	w(-1,-10,40,1)	CC1=c(0,0,1,0)	Yield	0.00913697	-8.73815	2.47716e-16	-0.406008	86.9663	0.67948	88.5165	75.3665	4.8305	14.254	-1091.69
BVC	Both	Mat=-1	Pht=-10	Yld=40	Gpc=10	w(-1,-10,40,10)	CC1=c(0,0,1,0)	Yield	-0.21933	-8.57378	2.4298e-16	-0.151767	84.4395	0.713182	88.5605	75.71	4.7975	14.629	-912.137
BVC	Both	Mat=-1	Pht=-10	Yld=40	Gpc=20	w(-1,-10,40,20)	CC1=c(0,0,1,0)	Yield	-0.473698	-8.10423	2.91706e-16	0.144288	84.4017	0.763954	88.619	76.084	4.803	14.9545	-708.991
BVC	Both	Mat=-1	Pht=-10	Yld=40	Gpc=30	w(-1,-10,40,30)	CC1=c(0,0,1,0)	Yield	-0.703991	-7.37951	2.50754e-16	0.425906	87.2763	0.822855	88.693	76.7515	4.8355	15.276	-502.849
BVC	Both	Mat=-1	Pht=-10	Yld=40	Gpc=40	w(-1,-10,40,40)	CC1=c(0,0,1,0)	Yield	-0.893415	-6.51022	2.35847e-16	0.66993	92.7928	0.878773	88.88	77.074	4.867	15.3965	-294.151
BVC	Both	Mat=-1	Pht=-10	Yld=40	Gpc=50	w(-1,-10,40,50)	CC1=c(0,0,1,0)	Yield	-1.03826	-5.61244	2.17723e-16	0.867094	100.517	0.92119	88.687	78.0345	4.898	15.6045	-83.5264
BVC	Both	Mat=-1	Pht=-10	Yld=40	Gpc=60	w(-1,-10,40,60)	CC1=c(0,0,1,0)	Yield	-1.14401	-4.76602	0	1.01969	109.986	0.945933	88.747	78.733	4.877	15.743	128.726
BVC	Both	Mat=-1	Pht=-10	Yld=40	Gpc=70	w(-1,-10,40,70)	CC1=c(0,0,1,0)	Yield	-1.21937	-4.00899	0	1.13541	120.788	0.955269	88.83	79.1585	4.9625	15.761	341.689
BVC	Both	Mat=-1	Pht=-10	Yld=40	Gpc=80	w(-1,-10,40,80)	CC1=c(0,0,1,0)	Yield	-1.2726	-3.35057	-8.25226e-17	1.22276	132.599	0.954142	88.83	79.1585	4.9625	15.761	555.574
BVC	Both	Mat=-1	Pht=-10	Yld=50	Gpc=1	w(-1,-10,50,1)	CC1=c(0,0,1,0)	Yield	0.00913697	-8.73815	3.7354e-16	-0.406008	86.9663	0.647663	88.5165	75.3665	4.8305	14.254	-1091.69
BVC	Both	Mat=-1	Pht=-10	Yld=50	Gpc=10	w(-1,-10,50,10)	CC1=c(0,0,1,0)	Yield	-0.21933	-8.57378	3.23973e-16	-0.151767	84.4395	0.678944	88.5605	75.71	4.7975	14.629	-912.137
BVC	Both	Mat=-1	Pht=-10	Yld=50	Gpc=20	w(-1,-10,50,20)	CC1=c(0,0,1,0)	Yield	-0.473698	-8.10423	3.88942e-16	0.144288	84.4017	0.728209	88.619	76.084	4.803	14.9545	-708.991
BVC	Both	Mat=-1	Pht=-10	Yld=50	Gpc=30	w(-1,-10,50,30)	CC1=c(0,0,1,0)	Yield	-0.703991	-7.37951	3.13443e-16	0.425906	87.2763	0.788363	88.693	76.7515	4.8355	15.276	-502.849
BVC	Both	Mat=-1	Pht=-10	Yld=50	Gpc=40	w(-1,-10,50,40)	CC1=c(0,0,1,0)	Yield	-0.893415	-6.51022	1.76885e-16	0.66993	92.7928	0.849411	88.88	77.074	4.867	15.3965	-294.151
BVC	Both	Mat=-1	Pht=-10	Yld=50	Gpc=50	w(-1,-10,50,50)	CC1=c(0,0,1,0)	Yield	-1.03826	-5.61244	2.17723e-16	0.867094	100.517	0.900175	88.687	78.0345	4.898	15.6045	-83.5264
BVC	Both	Mat=-1	Pht=-10	Yld=50	Gpc=60	w(-1,-10,50,60)	CC1=c(0,0,1,0)	Yield	-1.14401	-4.76602	1.9898e-16	1.01969	109.986	0.934236	88.747	78.733	4.877	15.743	128.726
BVC	Both	Mat=-1	Pht=-10	Yld=50	Gpc=70	w(-1,-10,50,70)	CC1=c(0,0,1,0)	Yield	-1.21937	-4.00899	4.5296e-17	1.13541	120.788	0.951737	88.83	79.1585	4.9625	15.761	341.689
BVC	Both	Mat=-1	Pht=-10	Yld=50	Gpc=80	w(-1,-10,50,80)	CC1=c(0,0,1,0)	Yield	-1.2726	-3.35057	0	1.22276	132.599	0.956694	88.83	79.1585	4.9625	15.761	555.574
BVC	Both	Mat=-1	Pht=-10	Yld=60	Gpc=1	w(-1,-10,60,1)	CC1=c(0,0,1,0)	Yield	0.00913697	-8.73815	2.47716e-16	-0.406008	86.9663	0.617522	88.5165	75.3665	4.8305	14.254	-1091.69
BVC	Both	Mat=-1	Pht=-10	Yld=60	Gpc=10	w(-1,-10,60,10)	CC1=c(0,0,1,0)	Yield	-0.21933	-8.57378	-6.47946e-17	-0.151767	84.4395	0.646272	88.5605	75.71	4.7975	14.629	-912.137
BVC	Both	Mat=-1	Pht=-10	Yld=60	Gpc=20	w(-1,-10,60,20)	CC1=c(0,0,1,0)	Yield	-0.473698	-8.10423	-2.59294e-16	0.144288	84.4017	0.693421	88.619	76.084	4.803	14.9545	-708.991
BVC	Both	Mat=-1	Pht=-10	Yld=60	Gpc=30	w(-1,-10,60,30)	CC1=c(0,0,1,0)	Yield	-0.703991	-7.37951	-1.25377e-16	0.425906	87.2763	0.753511	88.693	76.7515	4.8355	15.276	-502.849
BVC	Both	Mat=-1	Pht=-10	Yld=60	Gpc=40	w(-1,-10,60,40)	CC1=c(0,0,1,0)	Yield	-0.893415	-6.51022	-1.03183e-16	0.66993	92.7928	0.817871	88.88	77.074	4.867	15.3965	-294.151
BVC	Both	Mat=-1	Pht=-10	Yld=60	Gpc=50	w(-1,-10,60,50)	CC1=c(0,0,1,0)	Yield	-1.03826	-5.61244	-5.555e-17	0.867094	100.517	0.875379	88.687	78.0345	4.898	15.6045	-83.5264
BVC	Both	Mat=-1	Pht=-10	Yld=60	Gpc=60	w(-1,-10,60,60)	CC1=c(0,0,1,0)	Yield	-1.14401	-4.76602	0	1.01969	109.986	0.917998	88.747	78.733	4.877	15.743	128.726
BVC	Both	Mat=-1	Pht=-10	Yld=60	Gpc=70	w(-1,-10,60,70)	CC1=c(0,0,1,0)	Yield	-1.21937	-4.00899	9.0592e-17	1.13541	120.788	0.943776	88.83	79.1585	4.9625	15.761	341.689
BVC	Both	Mat=-1	Pht=-10	Yld=60	Gpc=80	w(-1,-10,60,80)	CC1=c(0,0,1,0)	Yield	-1.2726	-3.35057	1.65045e-16	1.22276	132.599	0.955423	88.83	79.1585	4.9625	15.761	555.574
BVC	Both	Mat=-1	Pht=-10	Yld=70	Gpc=1	w(-1,-10,70,1)	CC1=c(0,0,1,0)	Yield	0.00913697	-8.73815	3.70591e-16	-0.406008	86.9663	0.589139	88.5165	75.3665	4.8305	14.254	-1091.69
BVC	Both	Mat=-1	Pht=-10	Yld=70	Gpc=10	w(-1,-10,70,10)	CC1=c(0,0,1,0)	Yield	-0.21933	-8.57378	2.59179e-16	-0.151767	84.4395	0.615371	88.5605	75.71	4.7975	14.629	-912.137
BVC	Both	Mat=-1	Pht=-10	Yld=70	Gpc=20	w(-1,-10,70,20)	CC1=c(0,0,1,0)	Yield	-0.473698	-8.10423	4.21353e-16	0.144288	84.4017	0.660054	88.619	76.084	4.803	14.9545	-708.991
BVC	Both	Mat=-1	Pht=-10	Yld=70	Gpc=30	w(-1,-10,70,30)	CC1=c(0,0,1,0)	Yield	-0.703991	-7.37951	3.13443e-16	0.425906	87.2763	0.719118	88.693	76.7515	4.8355	15.276	-502.849
BVC	Both	Mat=-1	Pht=-10	Yld=70	Gpc=40	w(-1,-10,70,40)	CC1=c(0,0,1,0)	Yield	-0.893415	-6.51022	1.76885e-16	0.66993	92.7928	0.785237	88.88	77.074	4.867	15.3965	-294.151
BVC	Both	Mat=-1	Pht=-10	Yld=70	Gpc=50	w(-1,-10,70,50)	CC1=c(0,0,1,0)	Yield	-1.03826	-5.61244	1.08861e-16	0.867094	100.517	0.847841	88.687	78.0345	4.898	15.6045	-83.5264
BVC	Both	Mat=-1	Pht=-10	Yld=70	Gpc=60	w(-1,-10,70,60)	CC1=c(0,0,1,0)	Yield	-1.14401	-4.76602	-4.97449e-17	1.01969	109.986	0.897935	88.747	78.733	4.877	15.743	128.726
BVC	Both	Mat=-1	Pht=-10	Yld=70	Gpc=70	w(-1,-10,70,70)	CC1=c(0,0,1,0)	Yield	-1.21937	-4.00899	4.5296e-17	1.13541	120.788	0.931713	88.83	79.1585	4.9625	15.761	341.689
BVC	Both	Mat=-1	Pht=-10	Yld=70	Gpc=80	w(-1,-10,70,80)	CC1=c(0,0,1,0)	Yield	-1.2726	-3.35057	0	1.22276	132.599	0.950376	88.83	79.1585	4.9625	15.761	555.574
BVC	Both	Mat=-1	Pht=-10	Yld=80	Gpc=1	w(-1,-10,80,1)	CC1=c(0,0,1,0)	Yield	0.00913697	-8.73815	5.00838e-16	-0.406008	86.9663	0.562521	88.5165	75.3665	4.8305	14.254	-1091.69
BVC	Both	Mat=-1	Pht=-10	Yld=80	Gpc=10	w(-1,-10,80,10)	CC1=c(0,0,1,0)	Yield	-0.21933	-8.57378	5.18357e-16	-0.151767	84.4395	0.586329	88.5605	75.71	4.7975	14.629	-912.137
BVC	Both	Mat=-1	Pht=-10	Yld=80	Gpc=20	w(-1,-10,80,20)	CC1=c(0,0,1,0)	Yield	-0.473698	-8.10423	3.88942e-16	0.144288	84.4017	0.628384	88.619	76.084	4.803	14.9545	-708.991
BVC	Both	Mat=-1	Pht=-10	Yld=80	Gpc=30	w(-1,-10,80,30)	CC1=c(0,0,1,0)	Yield	-0.703991	-7.37951	1.25377e-16	0.425906	87.2763	0.685759	88.693	76.7515	4.8355	15.276	-502.849
BVC	Both	Mat=-1	Pht=-10	Yld=80	Gpc=40	w(-1,-10,80,40)	CC1=c(0,0,1,0)	Yield	-0.893415	-6.51022	2.35847e-16	0.66993	92.7928	0.752384	88.88	77.074	4.867	15.3965	-294.151
BVC	Both	Mat=-1	Pht=-10	Yld=80	Gpc=50	w(-1,-10,80,50)	CC1=c(0,0,1,0)	Yield	-1.03826	-5.61244	-5.44306e-17	0.867094	100.517	0.818537	88.687	78.0345	4.898	15.6045	-83.5264
BVC	Both	Mat=-1	Pht=-10	Yld=80	Gpc=60	w(-1,-10,80,60)	CC1=c(0,0,1,0)	Yield	-1.14401	-4.76602	4.97449e-17	1.01969	109.986	0.874838	88.747	78.733	4.877	15.743	128.726
BVC	Both	Mat=-1	Pht=-10	Yld=80	Gpc=70	w(-1,-10,80,70)	CC1=c(0,0,1,0)	Yield	-1.21937	-4.00899	1.81184e-16	1.13541	120.788	0.916017	88.83	79.1585	4.9625	15.761	341.689
BVC	Both	Mat=-1	Pht=-10	Yld=80	Gpc=80	w(-1,-10,80,80)	CC1=c(0,0,1,0)	Yield	-1.2726	-3.35057	1.65045e-16	1.22276	132.599	0.941729	88.83	79.1585	4.9625	15.761	555.574
BVC	Both	Mat=-1	Pht=-10	Yld=90	Gpc=1	w(-1,-10,90,1)	CC1=c(0,0,1,0)	Yield	0.00913697	-8.73815	5.02313e-16	-0.406008	86.9663	0.537623	88.5165	75.3665	4.8305	14.254	-1091.69
BVC	Both	Mat=-1	Pht=-10	Yld=90	Gpc=10	w(-1,-10,90,10)	CC1=c(0,0,1,0)	Yield	-0.21933	-8.57378	3.23973e-16	-0.151767	84.4395	0.559147	88.5605	75.71	4.7975	14.629	-912.137
BVC	Both	Mat=-1	Pht=-10	Yld=90	Gpc=20	w(-1,-10,90,20)	CC1=c(0,0,1,0)	Yield	-0.473698	-8.10423	2.91706e-16	0.144288	84.4017	0.598543	88.619	76.084	4.803	14.9545	-708.991
BVC	Both	Mat=-1	Pht=-10	Yld=90	Gpc=30	w(-1,-10,90,30)	CC1=c(0,0,1,0)	Yield	-0.703991	-7.37951	3.13443e-16	0.425906	87.2763	0.653805	88.693	76.7515	4.8355	15.276	-502.849
BVC	Both	Mat=-1	Pht=-10	Yld=90	Gpc=40	w(-1,-10,90,40)	CC1=c(0,0,1,0)	Yield	-0.893415	-6.51022	2.94808e-16	0.66993	92.7928	0.719975	88.88	77.074	4.867	15.3965	-294.151
BVC	Both	Mat=-1	Pht=-10	Yld=90	Gpc=50	w(-1,-10,90,50)	CC1=c(0,0,1,0)	Yield	-1.03826	-5.61244	2.17723e-16	0.867094	100.517	0.788315	88.687	78.0345	4.898	15.6045	-83.5264
BVC	Both	Mat=-1	Pht=-10	Yld=90	Gpc=60	w(-1,-10,90,60)	CC1=c(0,0,1,0)	Yield	-1.14401	-4.76602	9.94898e-17	1.01969	109.986	0.849507	88.747	78.733	4.877	15.743	128.726
BVC	Both	Mat=-1	Pht=-10	Yld=90	Gpc=70	w(-1,-10,90,70)	CC1=c(0,0,1,0)	Yield	-1.21937	-4.00899	9.0592e-17	1.13541	120.788	0.897252	88.83	79.1585	4.9625	15.761	341.689
BVC	Both	Mat=-1	Pht=-10	Yld=90	Gpc=80	w(-1,-10,90,80)	CC1=c(0,0,1,0)	Yield	-1.2726	-3.35057	4.12613e-17	1.22276	132.599	0.929773	88.83	79.1585	4.9625	15.761	555.574
BVC	Both	Mat=-1	Pht=-10	Yld=100	Gpc=1	w(-1,-10,100,1)	CC1=c(0,0,1,0)	Yield	0.00913697	-8.73815	4.39401e-16	-0.406008	86.9663	0.514372	88.5165	75.3665	4.8305	14.254	-1091.69
BVC	Both	Mat=-1	Pht=-10	Yld=100	Gpc=10	w(-1,-10,100,10)	CC1=c(0,0,1,0)	Yield	-0.21933	-8.57378	4.53562e-16	-0.151767	84.4395	0.533776	88.5605	75.71	4.7975	14.629	-912.137
BVC	Both	Mat=-1	Pht=-10	Yld=100	Gpc=20	w(-1,-10,100,20)	CC1=c(0,0,1,0)	Yield	-0.473698	-8.10423	3.88942e-16	0.144288	84.4017	0.570568	88.619	76.084	4.803	14.9545	-708.991
BVC	Both	Mat=-1	Pht=-10	Yld=100	Gpc=30	w(-1,-10,100,30)	CC1=c(0,0,1,0)	Yield	-0.703991	-7.37951	5.64197e-16	0.425906	87.2763	0.623474	88.693	76.7515	4.8355	15.276	-502.849
BVC	Both	Mat=-1	Pht=-10	Yld=100	Gpc=40	w(-1,-10,100,40)	CC1=c(0,0,1,0)	Yield	-0.893415	-6.51022	-8.84425e-17	0.66993	92.7928	0.688487	88.88	77.074	4.867	15.3965	-294.151
BVC	Both	Mat=-1	Pht=-10	Yld=100	Gpc=50	w(-1,-10,100,50)	CC1=c(0,0,1,0)	Yield	-1.03826	-5.61244	3.26584e-16	0.867094	100.517	0.757872	88.687	78.0345	4.898	15.6045	-83.5264
BVC	Both	Mat=-1	Pht=-10	Yld=100	Gpc=60	w(-1,-10,100,60)	CC1=c(0,0,1,0)	Yield	-1.14401	-4.76602	3.97959e-16	1.01969	109.986	0.822689	88.747	78.733	4.877	15.743	128.726
BVC	Both	Mat=-1	Pht=-10	Yld=100	Gpc=70	w(-1,-10,100,70)	CC1=c(0,0,1,0)	Yield	-1.21937	-4.00899	4.5296e-17	1.13541	120.788	0.876025	88.83	79.1585	4.9625	15.761	341.689
BVC	Both	Mat=-1	Pht=-10	Yld=100	Gpc=80	w(-1,-10,100,80)	CC1=c(0,0,1,0)	Yield	-1.2726	-3.35057	4.12613e-17	1.22276	132.599	0.91489	88.83	79.1585	4.9625	15.761	555.574
BVC	Both	Mat=-1	Pht=-10	Yld=110	Gpc=1	w(-1,-10,110,1)	CC1=c(0,0,1,0)	Yield	0.00913697	-8.73815	3.72065e-16	-0.406008	86.9663	0.492676	88.5165	75.3665	4.8305	14.254	-1091.69
BVC	Both	Mat=-1	Pht=-10	Yld=110	Gpc=10	w(-1,-10,110,10)	CC1=c(0,0,1,0)	Yield	-0.21933	-8.57378	-3.86061e-18	-0.151767	84.4395	0.510132	88.5605	75.71	4.7975	14.629	-912.137
BVC	Both	Mat=-1	Pht=-10	Yld=110	Gpc=20	w(-1,-10,110,20)	CC1=c(0,0,1,0)	Yield	-0.473698	-8.10423	3.5653e-16	0.144288	84.4017	0.544428	88.619	76.084	4.803	14.9545	-708.991
BVC	Both	Mat=-1	Pht=-10	Yld=110	Gpc=30	w(-1,-10,110,30)	CC1=c(0,0,1,0)	Yield	-0.703991	-7.37951	3.13443e-16	0.425906	87.2763	0.594868	88.693	76.7515	4.8355	15.276	-502.849
BVC	Both	Mat=-1	Pht=-10	Yld=110	Gpc=40	w(-1,-10,110,40)	CC1=c(0,0,1,0)	Yield	-0.893415	-6.51022	2.35847e-16	0.66993	92.7928	0.658233	88.88	77.074	4.867	15.3965	-294.151
BVC	Both	Mat=-1	Pht=-10	Yld=110	Gpc=50	w(-1,-10,110,50)	CC1=c(0,0,1,0)	Yield	-1.03826	-5.61244	-6.12345e-17	0.867094	100.517	0.727749	88.687	78.0345	4.898	15.6045	-83.5264
BVC	Both	Mat=-1	Pht=-10	Yld=110	Gpc=60	w(-1,-10,110,60)	CC1=c(0,0,1,0)	Yield	-1.14401	-4.76602	3.97959e-16	1.01969	109.986	0.795042	88.747	78.733	4.877	15.743	128.726
BVC	Both	Mat=-1	Pht=-10	Yld=110	Gpc=70	w(-1,-10,110,70)	CC1=c(0,0,1,0)	Yield	-1.21937	-4.00899	1.81184e-16	1.13541	120.788	0.852943	88.83	79.1585	4.9625	15.761	341.689
BVC	Both	Mat=-1	Pht=-10	Yld=110	Gpc=80	w(-1,-10,110,80)	CC1=c(0,0,1,0)	Yield	-1.2726	-3.35057	-4.12613e-17	1.22276	132.599	0.897516	88.83	79.1585	4.9625	15.761	555.574
BVC	Both	Mat=-1	Pht=-10	Yld=120	Gpc=1	w(-1,-10,120,1)	CC1=c(0,0,1,0)	Yield	0.00913697	-8.73815	4.39401e-16	-0.406008	86.9663	0.472436	88.5165	75.3665	4.8305	14.254	-1091.69
BVC	Both	Mat=-1	Pht=-10	Yld=120	Gpc=10	w(-1,-10,120,10)	CC1=c(0,0,1,0)	Yield	-0.21933	-8.57378	4.37364e-16	-0.151767	84.4395	0.488115	88.5605	75.71	4.7975	14.629	-912.137
BVC	Both	Mat=-1	Pht=-10	Yld=120	Gpc=20	w(-1,-10,120,20)	CC1=c(0,0,1,0)	Yield	-0.473698	-8.10423	4.86177e-16	0.144288	84.4017	0.520053	88.619	76.084	4.803	14.9545	-708.991
BVC	Both	Mat=-1	Pht=-10	Yld=120	Gpc=30	w(-1,-10,120,30)	CC1=c(0,0,1,0)	Yield	-0.703991	-7.37951	5.01508e-16	0.425906	87.2763	0.568008	88.693	76.7515	4.8355	15.276	-502.849
BVC	Both	Mat=-1	Pht=-10	Yld=120	Gpc=40	w(-1,-10,120,40)	CC1=c(0,0,1,0)	Yield	-0.893415	-6.51022	-8.84425e-17	0.66993	92.7928	0.629405	88.88	77.074	4.867	15.3965	-294.151
BVC	Both	Mat=-1	Pht=-10	Yld=120	Gpc=50	w(-1,-10,120,50)	CC1=c(0,0,1,0)	Yield	-1.03826	-5.61244	2.17723e-16	0.867094	100.517	0.698343	88.687	78.0345	4.898	15.6045	-83.5264
BVC	Both	Mat=-1	Pht=-10	Yld=120	Gpc=60	w(-1,-10,120,60)	CC1=c(0,0,1,0)	Yield	-1.14401	-4.76602	0	1.01969	109.986	0.767118	88.747	78.733	4.877	15.743	128.726
BVC	Both	Mat=-1	Pht=-10	Yld=120	Gpc=70	w(-1,-10,120,70)	CC1=c(0,0,1,0)	Yield	-1.21937	-4.00899	1.81184e-16	1.13541	120.788	0.828575	88.83	79.1585	4.9625	15.761	341.689
BVC	Both	Mat=-1	Pht=-10	Yld=120	Gpc=80	w(-1,-10,120,80)	CC1=c(0,0,1,0)	Yield	-1.2726	-3.35057	8.25226e-17	1.22276	132.599	0.878115	88.83	79.1585	4.9625	15.761	555.574
BVC	Both	Mat=-1	Pht=-10	Yld=130	Gpc=1	w(-1,-10,130,1)	CC1=c(0,0,1,0)	Yield	0.00913697	-8.73815	-2.51648e-16	-0.406008	86.9663	0.453548	88.5165	75.3665	4.8305	14.254	-1091.69
BVC	Both	Mat=-1	Pht=-10	Yld=130	Gpc=10	w(-1,-10,130,10)	CC1=c(0,0,1,0)	Yield	-0.21933	-8.57378	5.83152e-16	-0.151767	84.4395	0.467614	88.5605	75.71	4.7975	14.629	-912.137
BVC	Both	Mat=-1	Pht=-10	Yld=130	Gpc=20	w(-1,-10,130,20)	CC1=c(0,0,1,0)	Yield	-0.473698	-8.10423	8.43823e-18	0.144288	84.4017	0.497349	88.619	76.084	4.803	14.9545	-708.991
BVC	Both	Mat=-1	Pht=-10	Yld=130	Gpc=30	w(-1,-10,130,30)	CC1=c(0,0,1,0)	Yield	-0.703991	-7.37951	5.01508e-16	0.425906	87.2763	0.542861	88.693	76.7515	4.8355	15.276	-502.849
BVC	Both	Mat=-1	Pht=-10	Yld=130	Gpc=40	w(-1,-10,130,40)	CC1=c(0,0,1,0)	Yield	-0.893415	-6.51022	4.71694e-16	0.66993	92.7928	0.602099	88.88	77.074	4.867	15.3965	-294.151
BVC	Both	Mat=-1	Pht=-10	Yld=130	Gpc=50	w(-1,-10,130,50)	CC1=c(0,0,1,0)	Yield	-1.03826	-5.61244	4.35445e-16	0.867094	100.517	0.669933	88.687	78.0345	4.898	15.6045	-83.5264
BVC	Both	Mat=-1	Pht=-10	Yld=130	Gpc=60	w(-1,-10,130,60)	CC1=c(0,0,1,0)	Yield	-1.14401	-4.76602	2.98469e-16	1.01969	109.986	0.739357	88.747	78.733	4.877	15.743	128.726
BVC	Both	Mat=-1	Pht=-10	Yld=130	Gpc=70	w(-1,-10,130,70)	CC1=c(0,0,1,0)	Yield	-1.21937	-4.00899	2.71776e-16	1.13541	120.788	0.803432	88.83	79.1585	4.9625	15.761	341.689
BVC	Both	Mat=-1	Pht=-10	Yld=130	Gpc=80	w(-1,-10,130,80)	CC1=c(0,0,1,0)	Yield	-1.2726	-3.35057	1.65045e-16	1.22276	132.599	0.85715	88.83	79.1585	4.9625	15.761	555.574
BVC	Both	Mat=-1	Pht=-10	Yld=140	Gpc=1	w(-1,-10,140,1)	CC1=c(0,0,1,0)	Yield	0.00913697	-8.73815	-1.88736e-16	-0.406008	86.9663	0.435913	88.5165	75.3665	4.8305	14.254	-1091.69
BVC	Both	Mat=-1	Pht=-10	Yld=140	Gpc=10	w(-1,-10,140,10)	CC1=c(0,0,1,0)	Yield	-0.21933	-8.57378	4.53562e-16	-0.151767	84.4395	0.44852	88.5605	75.71	4.7975	14.629	-912.137
BVC	Both	Mat=-1	Pht=-10	Yld=140	Gpc=20	w(-1,-10,140,20)	CC1=c(0,0,1,0)	Yield	-0.473698	-8.10423	4.86177e-16	0.144288	84.4017	0.476209	88.619	76.084	4.803	14.9545	-708.991
BVC	Both	Mat=-1	Pht=-10	Yld=140	Gpc=30	w(-1,-10,140,30)	CC1=c(0,0,1,0)	Yield	-0.703991	-7.37951	5.01508e-16	0.425906	87.2763	0.519361	88.693	76.7515	4.8355	15.276	-502.849
BVC	Both	Mat=-1	Pht=-10	Yld=140	Gpc=40	w(-1,-10,140,40)	CC1=c(0,0,1,0)	Yield	-0.893415	-6.51022	4.12732e-16	0.66993	92.7928	0.576344	88.88	77.074	4.867	15.3965	-294.151
BVC	Both	Mat=-1	Pht=-10	Yld=140	Gpc=50	w(-1,-10,140,50)	CC1=c(0,0,1,0)	Yield	-1.03826	-5.61244	-4.76268e-17	0.867094	100.517	0.642698	88.687	78.0345	4.898	15.6045	-83.5264
BVC	Both	Mat=-1	Pht=-10	Yld=140	Gpc=60	w(-1,-10,140,60)	CC1=c(0,0,1,0)	Yield	-1.14401	-4.76602	1.9898e-16	1.01969	109.986	0.712097	88.747	78.733	4.877	15.743	128.726
BVC	Both	Mat=-1	Pht=-10	Yld=140	Gpc=70	w(-1,-10,140,70)	CC1=c(0,0,1,0)	Yield	-1.21937	-4.00899	3.62368e-16	1.13541	120.788	0.777951	88.83	79.1585	4.9625	15.761	341.689
BVC	Both	Mat=-1	Pht=-10	Yld=140	Gpc=80	w(-1,-10,140,80)	CC1=c(0,0,1,0)	Yield	-1.2726	-3.35057	1.65045e-16	1.22276	132.599	0.835055	88.83	79.1585	4.9625	15.761	555.574
BVC	Both	Mat=-1	Pht=-10	Yld=150	Gpc=1	w(-1,-10,150,1)	CC1=c(0,0,1,0)	Yield	0.00913697	-8.73815	5.62276e-16	-0.406008	86.9663	0.419433	88.5165	75.3665	4.8305	14.254	-1091.69
BVC	Both	Mat=-1	Pht=-10	Yld=150	Gpc=10	w(-1,-10,150,10)	CC1=c(0,0,1,0)	Yield	-0.21933	-8.57378	5.83152e-16	-0.151767	84.4395	0.430722	88.5605	75.71	4.7975	14.629	-912.137
BVC	Both	Mat=-1	Pht=-10	Yld=150	Gpc=20	w(-1,-10,150,20)	CC1=c(0,0,1,0)	Yield	-0.473698	-8.10423	6.48236e-16	0.144288	84.4017	0.456522	88.619	76.084	4.803	14.9545	-708.991
BVC	Both	Mat=-1	Pht=-10	Yld=150	Gpc=30	w(-1,-10,150,30)	CC1=c(0,0,1,0)	Yield	-0.703991	-7.37951	5.64197e-16	0.425906	87.2763	0.497422	88.693	76.7515	4.8355	15.276	-502.849
BVC	Both	Mat=-1	Pht=-10	Yld=150	Gpc=40	w(-1,-10,150,40)	CC1=c(0,0,1,0)	Yield	-0.893415	-6.51022	3.5377e-16	0.66993	92.7928	0.552123	88.88	77.074	4.867	15.3965	-294.151
BVC	Both	Mat=-1	Pht=-10	Yld=150	Gpc=50	w(-1,-10,150,50)	CC1=c(0,0,1,0)	Yield	-1.03826	-5.61244	3.26584e-16	0.867094	100.517	0.616739	88.687	78.0345	4.898	15.6045	-83.5264
BVC	Both	Mat=-1	Pht=-10	Yld=150	Gpc=60	w(-1,-10,150,60)	CC1=c(0,0,1,0)	Yield	-1.14401	-4.76602	2.98469e-16	1.01969	109.986	0.685586	88.747	78.733	4.877	15.743	128.726
BVC	Both	Mat=-1	Pht=-10	Yld=150	Gpc=70	w(-1,-10,150,70)	CC1=c(0,0,1,0)	Yield	-1.21937	-4.00899	1.81184e-16	1.13541	120.788	0.752491	88.83	79.1585	4.9625	15.761	341.689
BVC	Both	Mat=-1	Pht=-10	Yld=150	Gpc=80	w(-1,-10,150,80)	CC1=c(0,0,1,0)	Yield	-1.2726	-3.35057	1.65045e-16	1.22276	132.599	0.812229	88.83	79.1585	4.9625	15.761	555.574
BVC	Both	Mat=-1	Pht=-15	Yld=1	Gpc=1	w(-1,-15,1,1)	CC1=c(0,0,1,0)	Yield	0.0787041	-8.74537	1.97563e-16	-0.42307	130.679	0.809629	88.5165	75.3665	4.8305	14.254	-1614.95
BVC	Both	Mat=-1	Pht=-15	Yld=1	Gpc=10	w(-1,-15,1,10)	CC1=c(0,0,1,0)	Yield	-0.0707609	-8.67391	1.17905e-16	-0.256974	127.61	0.833869	88.43	75.6265	4.7945	14.4225	-1436.15
BVC	Both	Mat=-1	Pht=-15	Yld=1	Gpc=20	w(-1,-15,1,20)	CC1=c(0,0,1,0)	Yield	-0.241971	-8.467	2.38806e-16	-0.0618926	126.009	0.863248	88.764	75.816	4.7975	14.78	-1234.41
BVC	Both	Mat=-1	Pht=-15	Yld=1	Gpc=30	w(-1,-15,1,30)	CC1=c(0,0,1,0)	Yield	-0.411068	-8.12592	1.73165e-16	0.13605	126.381	0.89249	88.6995	76.1445	4.7765	14.945	-1030.93
BVC	Both	Mat=-1	Pht=-15	Yld=1	Gpc=40	w(-1,-15,1,40)	CC1=c(0,0,1,0)	Yield	-0.570372	-7.66853	1.27525e-16	0.327774	128.709	0.918113	88.8505	76.4345	4.8335	15.174	-825.133
BVC	Both	Mat=-1	Pht=-15	Yld=1	Gpc=50	w(-1,-15,1,50)	CC1=c(0,0,1,0)	Yield	-0.713921	-7.12662	8.23421e-17	0.505537	132.89	0.937101	88.724	76.92	4.848	15.342	-617.539
BVC	Both	Mat=-1	Pht=-15	Yld=1	Gpc=60	w(-1,-15,1,60)	CC1=c(0,0,1,0)	Yield	-0.838404	-6.53738	-2.95728e-17	0.664287	138.756	0.948002	88.88	77.074	4.867	15.3965	-408.654
BVC	Both	Mat=-1	Pht=-15	Yld=1	Gpc=70	w(-1,-15,1,70)	CC1=c(0,0,1,0)	Yield	-0.943119	-5.93509	0	0.801938	146.105	0.951207	88.878	77.618	4.898	15.5225	-198.575
BVC	Both	Mat=-1	Pht=-15	Yld=1	Gpc=80	w(-1,-15,1,80)	CC1=c(0,0,1,0)	Yield	-1.02928	-5.3462	1.14923e-16	0.918792	154.726	0.94835	88.747	78.733	4.877	15.743	13.0235
BVC	Both	Mat=-1	Pht=-15	Yld=10	Gpc=1	w(-1,-15,10,1)	CC1=c(0,0,1,0)	Yield	0.0787041	-8.74537	1.15136e-16	-0.42307	130.679	0.78872	88.5165	75.3665	4.8305	14.254	-1614.95
BVC	Both	Mat=-1	Pht=-15	Yld=10	Gpc=10	w(-1,-15,10,10)	CC1=c(0,0,1,0)	Yield	-0.0707609	-8.67391	1.17905e-16	-0.256974	127.61	0.812963	88.43	75.6265	4.7945	14.4225	-1436.15
BVC	Both	Mat=-1	Pht=-15	Yld=10	Gpc=20	w(-1,-15,10,20)	CC1=c(0,0,1,0)	Yield	-0.241971	-8.467	1.51967e-16	-0.0618926	126.009	0.843292	88.764	75.816	4.7975	14.78	-1234.41
BVC	Both	Mat=-1	Pht=-15	Yld=10	Gpc=30	w(-1,-15,10,30)	CC1=c(0,0,1,0)	Yield	-0.411068	-8.12592	2.16457e-16	0.13605	126.381	0.874766	88.6995	76.1445	4.7765	14.945	-1030.93
BVC	Both	Mat=-1	Pht=-15	Yld=10	Gpc=40	w(-1,-15,10,40)	CC1=c(0,0,1,0)	Yield	-0.570372	-7.66853	8.50168e-17	0.327774	128.709	0.903938	88.8505	76.4345	4.8335	15.174	-825.133
BVC	Both	Mat=-1	Pht=-15	Yld=10	Gpc=50	w(-1,-15,10,50)	CC1=c(0,0,1,0)	Yield	-0.713921	-7.12662	2.47026e-16	0.505537	132.89	0.927429	88.724	76.92	4.848	15.342	-617.539
BVC	Both	Mat=-1	Pht=-15	Yld=10	Gpc=60	w(-1,-15,10,60)	CC1=c(0,0,1,0)	Yield	-0.838404	-6.53738	-9.85761e-18	0.664287	138.756	0.943127	88.88	77.074	4.867	15.3965	-408.654
BVC	Both	Mat=-1	Pht=-15	Yld=10	Gpc=70	w(-1,-15,10,70)	CC1=c(0,0,1,0)	Yield	-0.943119	-5.93509	1.49789e-16	0.801938	146.105	0.950754	88.878	77.618	4.898	15.5225	-198.575
BVC	Both	Mat=-1	Pht=-15	Yld=10	Gpc=80	w(-1,-15,10,80)	CC1=c(0,0,1,0)	Yield	-1.02928	-5.3462	6.44918e-17	0.918792	154.726	0.951521	88.747	78.733	4.877	15.743	13.0235
BVC	Both	Mat=-1	Pht=-15	Yld=20	Gpc=1	w(-1,-15,20,1)	CC1=c(0,0,1,0)	Yield	0.0787041	-8.74537	2.82607e-16	-0.42307	130.679	0.765358	88.5165	75.3665	4.8305	14.254	-1614.95
BVC	Both	Mat=-1	Pht=-15	Yld=20	Gpc=10	w(-1,-15,20,10)	CC1=c(0,0,1,0)	Yield	-0.0707609	-8.67391	1.17905e-16	-0.256974	127.61	0.789265	88.43	75.6265	4.7945	14.4225	-1436.15
BVC	Both	Mat=-1	Pht=-15	Yld=20	Gpc=20	w(-1,-15,20,20)	CC1=c(0,0,1,0)	Yield	-0.241971	-8.467	1.95387e-16	-0.0618926	126.009	0.820111	88.764	75.816	4.7975	14.78	-1234.41
BVC	Both	Mat=-1	Pht=-15	Yld=20	Gpc=30	w(-1,-15,20,30)	CC1=c(0,0,1,0)	Yield	-0.411068	-8.12592	2.16457e-16	0.13605	126.381	0.853399	88.6995	76.1445	4.7765	14.945	-1030.93
BVC	Both	Mat=-1	Pht=-15	Yld=20	Gpc=40	w(-1,-15,20,40)	CC1=c(0,0,1,0)	Yield	-0.570372	-7.66853	2.5505e-16	0.327774	128.709	0.885847	88.8505	76.4345	4.8335	15.174	-825.133
BVC	Both	Mat=-1	Pht=-15	Yld=20	Gpc=50	w(-1,-15,20,50)	CC1=c(0,0,1,0)	Yield	-0.713921	-7.12662	-1.02928e-16	0.505537	132.89	0.913848	88.724	76.92	4.848	15.342	-617.539
BVC	Both	Mat=-1	Pht=-15	Yld=20	Gpc=60	w(-1,-15,20,60)	CC1=c(0,0,1,0)	Yield	-0.838404	-6.53738	1.57722e-16	0.664287	138.756	0.93468	88.88	77.074	4.867	15.3965	-408.654
BVC	Both	Mat=-1	Pht=-15	Yld=20	Gpc=70	w(-1,-15,20,70)	CC1=c(0,0,1,0)	Yield	-0.943119	-5.93509	1.49789e-16	0.801938	146.105	0.947326	88.878	77.618	4.898	15.5225	-198.575
BVC	Both	Mat=-1	Pht=-15	Yld=20	Gpc=80	w(-1,-15,20,80)	CC1=c(0,0,1,0)	Yield	-1.02928	-5.3462	7.07216e-17	0.918792	154.726	0.952431	88.747	78.733	4.877	15.743	13.0235
BVC	Both	Mat=-1	Pht=-15	Yld=30	Gpc=1	w(-1,-15,30,1)	CC1=c(0,0,1,0)	Yield	0.0787041	-8.74537	1.94947e-16	-0.42307	130.679	0.742107	88.5165	75.3665	4.8305	14.254	-1614.95
BVC	Both	Mat=-1	Pht=-15	Yld=30	Gpc=10	w(-1,-15,30,10)	CC1=c(0,0,1,0)	Yield	-0.0707609	-8.67391	-1.71499e-16	-0.256974	127.61	0.765396	88.43	75.6265	4.7945	14.4225	-1436.15
BVC	Both	Mat=-1	Pht=-15	Yld=30	Gpc=20	w(-1,-15,30,20)	CC1=c(0,0,1,0)	Yield	-0.241971	-8.467	2.82225e-16	-0.0618926	126.009	0.796283	88.764	75.816	4.7975	14.78	-1234.41
BVC	Both	Mat=-1	Pht=-15	Yld=30	Gpc=30	w(-1,-15,30,30)	CC1=c(0,0,1,0)	Yield	-0.411068	-8.12592	2.59748e-16	0.13605	126.381	0.830747	88.6995	76.1445	4.7765	14.945	-1030.93
BVC	Both	Mat=-1	Pht=-15	Yld=30	Gpc=40	w(-1,-15,30,40)	CC1=c(0,0,1,0)	Yield	-0.570372	-7.66853	2.5505e-16	0.327774	128.709	0.865768	88.8505	76.4345	4.8335	15.174	-825.133
BVC	Both	Mat=-1	Pht=-15	Yld=30	Gpc=50	w(-1,-15,30,50)	CC1=c(0,0,1,0)	Yield	-0.713921	-7.12662	2.47026e-16	0.505537	132.89	0.897677	88.724	76.92	4.848	15.342	-617.539
BVC	Both	Mat=-1	Pht=-15	Yld=30	Gpc=60	w(-1,-15,30,60)	CC1=c(0,0,1,0)	Yield	-0.838404	-6.53738	1.57722e-16	0.664287	138.756	0.923292	88.88	77.074	4.867	15.3965	-408.654
BVC	Both	Mat=-1	Pht=-15	Yld=30	Gpc=70	w(-1,-15,30,70)	CC1=c(0,0,1,0)	Yield	-0.943119	-5.93509	7.48943e-17	0.801938	146.105	0.940915	88.878	77.618	4.898	15.5225	-198.575
BVC	Both	Mat=-1	Pht=-15	Yld=30	Gpc=80	w(-1,-15,30,80)	CC1=c(0,0,1,0)	Yield	-1.02928	-5.3462	0	0.918792	154.726	0.950569	88.747	78.733	4.877	15.743	13.0235
BVC	Both	Mat=-1	Pht=-15	Yld=40	Gpc=1	w(-1,-15,40,1)	CC1=c(0,0,1,0)	Yield	0.0787041	-8.74537	1.98872e-16	-0.42307	130.679	0.719171	88.5165	75.3665	4.8305	14.254	-1614.95
BVC	Both	Mat=-1	Pht=-15	Yld=40	Gpc=10	w(-1,-15,40,10)	CC1=c(0,0,1,0)	Yield	-0.0707609	-8.67391	2.03655e-16	-0.256974	127.61	0.741633	88.43	75.6265	4.7945	14.4225	-1436.15
BVC	Both	Mat=-1	Pht=-15	Yld=40	Gpc=20	w(-1,-15,40,20)	CC1=c(0,0,1,0)	Yield	-0.241971	-8.467	1.51967e-16	-0.0618926	126.009	0.772175	88.764	75.816	4.7975	14.78	-1234.41
BVC	Both	Mat=-1	Pht=-15	Yld=40	Gpc=30	w(-1,-15,40,30)	CC1=c(0,0,1,0)	Yield	-0.411068	-8.12592	-4.32914e-17	0.13605	126.381	0.80726	88.6995	76.1445	4.7765	14.945	-1030.93
BVC	Both	Mat=-1	Pht=-15	Yld=40	Gpc=40	w(-1,-15,40,40)	CC1=c(0,0,1,0)	Yield	-0.570372	-7.66853	2.5505e-16	0.327774	128.709	0.844186	88.8505	76.4345	4.8335	15.174	-825.133
BVC	Both	Mat=-1	Pht=-15	Yld=40	Gpc=50	w(-1,-15,40,50)	CC1=c(0,0,1,0)	Yield	-0.713921	-7.12662	2.47026e-16	0.505537	132.89	0.879354	88.724	76.92	4.848	15.342	-617.539
BVC	Both	Mat=-1	Pht=-15	Yld=40	Gpc=60	w(-1,-15,40,60)	CC1=c(0,0,1,0)	Yield	-0.838404	-6.53738	5.69498e-17	0.664287	138.756	0.909288	88.88	77.074	4.867	15.3965	-408.654
BVC	Both	Mat=-1	Pht=-15	Yld=40	Gpc=70	w(-1,-15,40,70)	CC1=c(0,0,1,0)	Yield	-0.943119	-5.93509	7.48943e-17	0.801938	146.105	0.931701	88.878	77.618	4.898	15.5225	-198.575
BVC	Both	Mat=-1	Pht=-15	Yld=40	Gpc=80	w(-1,-15,40,80)	CC1=c(0,0,1,0)	Yield	-1.02928	-5.3462	7.07216e-17	0.918792	154.726	0.945983	88.747	78.733	4.877	15.743	13.0235
BVC	Both	Mat=-1	Pht=-15	Yld=50	Gpc=1	w(-1,-15,50,1)	CC1=c(0,0,1,0)	Yield	0.0787041	-8.74537	2.0018e-16	-0.42307	130.679	0.696708	88.5165	75.3665	4.8305	14.254	-1614.95
BVC	Both	Mat=-1	Pht=-15	Yld=50	Gpc=10	w(-1,-15,50,10)	CC1=c(0,0,1,0)	Yield	-0.0707609	-8.67391	2.03655e-16	-0.256974	127.61	0.718196	88.43	75.6265	4.7945	14.4225	-1436.15
BVC	Both	Mat=-1	Pht=-15	Yld=50	Gpc=20	w(-1,-15,50,20)	CC1=c(0,0,1,0)	Yield	-0.241971	-8.467	2.82225e-16	-0.0618926	126.009	0.748094	88.764	75.816	4.7975	14.78	-1234.41
BVC	Both	Mat=-1	Pht=-15	Yld=50	Gpc=30	w(-1,-15,50,30)	CC1=c(0,0,1,0)	Yield	-0.411068	-8.12592	2.16457e-16	0.13605	126.381	0.783331	88.6995	76.1445	4.7765	14.945	-1030.93
BVC	Both	Mat=-1	Pht=-15	Yld=50	Gpc=40	w(-1,-15,50,40)	CC1=c(0,0,1,0)	Yield	-0.570372	-7.66853	-8.50168e-17	0.327774	128.709	0.821551	88.8505	76.4345	4.8335	15.174	-825.133
BVC	Both	Mat=-1	Pht=-15	Yld=50	Gpc=50	w(-1,-15,50,50)	CC1=c(0,0,1,0)	Yield	-0.713921	-7.12662	6.17566e-17	0.505537	132.89	0.859329	88.724	76.92	4.848	15.342	-617.539
BVC	Both	Mat=-1	Pht=-15	Yld=50	Gpc=60	w(-1,-15,50,60)	CC1=c(0,0,1,0)	Yield	-0.838404	-6.53738	2.36583e-16	0.664287	138.756	0.893041	88.88	77.074	4.867	15.3965	-408.654
BVC	Both	Mat=-1	Pht=-15	Yld=50	Gpc=70	w(-1,-15,50,70)	CC1=c(0,0,1,0)	Yield	-0.943119	-5.93509	7.48943e-17	0.801938	146.105	0.919932	88.878	77.618	4.898	15.5225	-198.575
BVC	Both	Mat=-1	Pht=-15	Yld=50	Gpc=80	w(-1,-15,50,80)	CC1=c(0,0,1,0)	Yield	-1.02928	-5.3462	-1.76804e-17	0.918792	154.726	0.938791	88.747	78.733	4.877	15.743	13.0235
BVC	Both	Mat=-1	Pht=-15	Yld=60	Gpc=1	w(-1,-15,60,1)	CC1=c(0,0,1,0)	Yield	0.0787041	-8.74537	-1.67471e-16	-0.42307	130.679	0.674836	88.5165	75.3665	4.8305	14.254	-1614.95
BVC	Both	Mat=-1	Pht=-15	Yld=60	Gpc=10	w(-1,-15,60,10)	CC1=c(0,0,1,0)	Yield	-0.0707609	-8.67391	-1.71499e-16	-0.256974	127.61	0.695255	88.43	75.6265	4.7945	14.4225	-1436.15
BVC	Both	Mat=-1	Pht=-15	Yld=60	Gpc=20	w(-1,-15,60,20)	CC1=c(0,0,1,0)	Yield	-0.241971	-8.467	-8.68385e-17	-0.0618926	126.009	0.724284	88.764	75.816	4.7975	14.78	-1234.41
BVC	Both	Mat=-1	Pht=-15	Yld=60	Gpc=30	w(-1,-15,60,30)	CC1=c(0,0,1,0)	Yield	-0.411068	-8.12592	2.59748e-16	0.13605	126.381	0.759292	88.6995	76.1445	4.7765	14.945	-1030.93
BVC	Both	Mat=-1	Pht=-15	Yld=60	Gpc=40	w(-1,-15,60,40)	CC1=c(0,0,1,0)	Yield	-0.570372	-7.66853	3.40067e-16	0.327774	128.709	0.79827	88.8505	76.4345	4.8335	15.174	-825.133
BVC	Both	Mat=-1	Pht=-15	Yld=60	Gpc=50	w(-1,-15,60,50)	CC1=c(0,0,1,0)	Yield	-0.713921	-7.12662	2.47026e-16	0.505537	132.89	0.838035	88.724	76.92	4.848	15.342	-617.539
BVC	Both	Mat=-1	Pht=-15	Yld=60	Gpc=60	w(-1,-15,60,60)	CC1=c(0,0,1,0)	Yield	-0.838404	-6.53738	1.57722e-16	0.664287	138.756	0.874943	88.88	77.074	4.867	15.3965	-408.654
BVC	Both	Mat=-1	Pht=-15	Yld=60	Gpc=70	w(-1,-15,60,70)	CC1=c(0,0,1,0)	Yield	-0.943119	-5.93509	-2.57449e-17	0.801938	146.105	0.905904	88.878	77.618	4.898	15.5225	-198.575
BVC	Both	Mat=-1	Pht=-15	Yld=60	Gpc=80	w(-1,-15,60,80)	CC1=c(0,0,1,0)	Yield	-1.02928	-5.3462	1.41443e-16	0.918792	154.726	0.929169	88.747	78.733	4.877	15.743	13.0235
BVC	Both	Mat=-1	Pht=-15	Yld=70	Gpc=1	w(-1,-15,70,1)	CC1=c(0,0,1,0)	Yield	0.0787041	-8.74537	2.78682e-16	-0.42307	130.679	0.65364	88.5165	75.3665	4.8305	14.254	-1614.95
BVC	Both	Mat=-1	Pht=-15	Yld=70	Gpc=10	w(-1,-15,70,10)	CC1=c(0,0,1,0)	Yield	-0.0707609	-8.67391	2.03655e-16	-0.256974	127.61	0.672935	88.43	75.6265	4.7945	14.4225	-1436.15
BVC	Both	Mat=-1	Pht=-15	Yld=70	Gpc=20	w(-1,-15,70,20)	CC1=c(0,0,1,0)	Yield	-0.241971	-8.467	0	-0.0618926	126.009	0.700935	88.764	75.816	4.7975	14.78	-1234.41
BVC	Both	Mat=-1	Pht=-15	Yld=70	Gpc=30	w(-1,-15,70,30)	CC1=c(0,0,1,0)	Yield	-0.411068	-8.12592	-4.32914e-17	0.13605	126.381	0.735414	88.6995	76.1445	4.7765	14.945	-1030.93
BVC	Both	Mat=-1	Pht=-15	Yld=70	Gpc=40	w(-1,-15,70,40)	CC1=c(0,0,1,0)	Yield	-0.570372	-7.66853	-4.25084e-17	0.327774	128.709	0.774691	88.8505	76.4345	4.8335	15.174	-825.133
BVC	Both	Mat=-1	Pht=-15	Yld=70	Gpc=50	w(-1,-15,70,50)	CC1=c(0,0,1,0)	Yield	-0.713921	-7.12662	-2.05855e-17	0.505537	132.89	0.815871	88.724	76.92	4.848	15.342	-617.539
BVC	Both	Mat=-1	Pht=-15	Yld=70	Gpc=60	w(-1,-15,70,60)	CC1=c(0,0,1,0)	Yield	-0.838404	-6.53738	3.15444e-16	0.664287	138.756	0.855389	88.88	77.074	4.867	15.3965	-408.654
BVC	Both	Mat=-1	Pht=-15	Yld=70	Gpc=70	w(-1,-15,70,70)	CC1=c(0,0,1,0)	Yield	-0.943119	-5.93509	6.31921e-17	0.801938	146.105	0.889945	88.878	77.618	4.898	15.5225	-198.575
BVC	Both	Mat=-1	Pht=-15	Yld=70	Gpc=80	w(-1,-15,70,80)	CC1=c(0,0,1,0)	Yield	-1.02928	-5.3462	0	0.918792	154.726	0.917344	88.747	78.733	4.877	15.743	13.0235
BVC	Both	Mat=-1	Pht=-15	Yld=80	Gpc=1	w(-1,-15,80,1)	CC1=c(0,0,1,0)	Yield	0.0787041	-8.74537	2.82607e-16	-0.42307	130.679	0.633176	88.5165	75.3665	4.8305	14.254	-1614.95
BVC	Both	Mat=-1	Pht=-15	Yld=80	Gpc=10	w(-1,-15,80,10)	CC1=c(0,0,1,0)	Yield	-0.0707609	-8.67391	3.75154e-16	-0.256974	127.61	0.651325	88.43	75.6265	4.7945	14.4225	-1436.15
BVC	Both	Mat=-1	Pht=-15	Yld=80	Gpc=20	w(-1,-15,80,20)	CC1=c(0,0,1,0)	Yield	-0.241971	-8.467	4.12483e-16	-0.0618926	126.009	0.678191	88.764	75.816	4.7975	14.78	-1234.41
BVC	Both	Mat=-1	Pht=-15	Yld=80	Gpc=30	w(-1,-15,80,30)	CC1=c(0,0,1,0)	Yield	-0.411068	-8.12592	2.16457e-16	0.13605	126.381	0.711909	88.6995	76.1445	4.7765	14.945	-1030.93
BVC	Both	Mat=-1	Pht=-15	Yld=80	Gpc=40	w(-1,-15,80,40)	CC1=c(0,0,1,0)	Yield	-0.570372	-7.66853	2.5505e-16	0.327774	128.709	0.751109	88.8505	76.4345	4.8335	15.174	-825.133
BVC	Both	Mat=-1	Pht=-15	Yld=80	Gpc=50	w(-1,-15,80,50)	CC1=c(0,0,1,0)	Yield	-0.713921	-7.12662	2.47026e-16	0.505537	132.89	0.793192	88.724	76.92	4.848	15.342	-617.539
BVC	Both	Mat=-1	Pht=-15	Yld=80	Gpc=60	w(-1,-15,80,60)	CC1=c(0,0,1,0)	Yield	-0.838404	-6.53738	1.97152e-17	0.664287	138.756	0.834754	88.88	77.074	4.867	15.3965	-408.654
BVC	Both	Mat=-1	Pht=-15	Yld=80	Gpc=70	w(-1,-15,80,70)	CC1=c(0,0,1,0)	Yield	-0.943119	-5.93509	1.49789e-16	0.801938	146.105	0.872396	88.878	77.618	4.898	15.5225	-198.575
BVC	Both	Mat=-1	Pht=-15	Yld=80	Gpc=80	w(-1,-15,80,80)	CC1=c(0,0,1,0)	Yield	-1.02928	-5.3462	1.41443e-16	0.918792	154.726	0.903577	88.747	78.733	4.877	15.743	13.0235
BVC	Both	Mat=-1	Pht=-15	Yld=90	Gpc=1	w(-1,-15,90,1)	CC1=c(0,0,1,0)	Yield	0.0787041	-8.74537	2.82607e-16	-0.42307	130.679	0.613477	88.5165	75.3665	4.8305	14.254	-1614.95
BVC	Both	Mat=-1	Pht=-15	Yld=90	Gpc=10	w(-1,-15,90,10)	CC1=c(0,0,1,0)	Yield	-0.0707609	-8.67391	2.89404e-16	-0.256974	127.61	0.630482	88.43	75.6265	4.7945	14.4225	-1436.15
BVC	Both	Mat=-1	Pht=-15	Yld=90	Gpc=20	w(-1,-15,90,20)	CC1=c(0,0,1,0)	Yield	-0.241971	-8.467	2.38806e-16	-0.0618926	126.009	0.656152	88.764	75.816	4.7975	14.78	-1234.41
BVC	Both	Mat=-1	Pht=-15	Yld=90	Gpc=30	w(-1,-15,90,30)	CC1=c(0,0,1,0)	Yield	-0.411068	-8.12592	-9.19921e-17	0.13605	126.381	0.688941	88.6995	76.1445	4.7765	14.945	-1030.93
BVC	Both	Mat=-1	Pht=-15	Yld=90	Gpc=40	w(-1,-15,90,40)	CC1=c(0,0,1,0)	Yield	-0.570372	-7.66853	3.40067e-16	0.327774	128.709	0.727758	88.8505	76.4345	4.8335	15.174	-825.133
BVC	Both	Mat=-1	Pht=-15	Yld=90	Gpc=50	w(-1,-15,90,50)	CC1=c(0,0,1,0)	Yield	-0.713921	-7.12662	2.47026e-16	0.505537	132.89	0.770304	88.724	76.92	4.848	15.342	-617.539
BVC	Both	Mat=-1	Pht=-15	Yld=90	Gpc=60	w(-1,-15,90,60)	CC1=c(0,0,1,0)	Yield	-0.838404	-6.53738	-4.92881e-17	0.664287	138.756	0.813383	88.88	77.074	4.867	15.3965	-408.654
BVC	Both	Mat=-1	Pht=-15	Yld=90	Gpc=70	w(-1,-15,90,70)	CC1=c(0,0,1,0)	Yield	-0.943119	-5.93509	2.24683e-16	0.801938	146.105	0.853594	88.878	77.618	4.898	15.5225	-198.575
BVC	Both	Mat=-1	Pht=-15	Yld=90	Gpc=80	w(-1,-15,90,80)	CC1=c(0,0,1,0)	Yield	-1.02928	-5.3462	7.07216e-17	0.918792	154.726	0.88815	88.747	78.733	4.877	15.743	13.0235
BVC	Both	Mat=-1	Pht=-15	Yld=100	Gpc=1	w(-1,-15,100,1)	CC1=c(0,0,1,0)	Yield	0.0787041	-8.74537	3.63726e-16	-0.42307	130.679	0.594559	88.5165	75.3665	4.8305	14.254	-1614.95
BVC	Both	Mat=-1	Pht=-15	Yld=100	Gpc=10	w(-1,-15,100,10)	CC1=c(0,0,1,0)	Yield	-0.0707609	-8.67391	2.03655e-16	-0.256974	127.61	0.610443	88.43	75.6265	4.7945	14.4225	-1436.15
BVC	Both	Mat=-1	Pht=-15	Yld=100	Gpc=20	w(-1,-15,100,20)	CC1=c(0,0,1,0)	Yield	-0.241971	-8.467	0	-0.0618926	126.009	0.634886	88.764	75.816	4.7975	14.78	-1234.41
BVC	Both	Mat=-1	Pht=-15	Yld=100	Gpc=30	w(-1,-15,100,30)	CC1=c(0,0,1,0)	Yield	-0.411068	-8.12592	-2.16457e-16	0.13605	126.381	0.666629	88.6995	76.1445	4.7765	14.945	-1030.93
BVC	Both	Mat=-1	Pht=-15	Yld=100	Gpc=40	w(-1,-15,100,40)	CC1=c(0,0,1,0)	Yield	-0.570372	-7.66853	-1.27525e-16	0.327774	128.709	0.704825	88.8505	76.4345	4.8335	15.174	-825.133
BVC	Both	Mat=-1	Pht=-15	Yld=100	Gpc=50	w(-1,-15,100,50)	CC1=c(0,0,1,0)	Yield	-0.713921	-7.12662	2.05855e-17	0.505537	132.89	0.747463	88.724	76.92	4.848	15.342	-617.539
BVC	Both	Mat=-1	Pht=-15	Yld=100	Gpc=60	w(-1,-15,100,60)	CC1=c(0,0,1,0)	Yield	-0.838404	-6.53738	2.95728e-17	0.664287	138.756	0.791582	88.88	77.074	4.867	15.3965	-408.654
BVC	Both	Mat=-1	Pht=-15	Yld=100	Gpc=70	w(-1,-15,100,70)	CC1=c(0,0,1,0)	Yield	-0.943119	-5.93509	2.99577e-16	0.801938	146.105	0.833858	88.878	77.618	4.898	15.5225	-198.575
BVC	Both	Mat=-1	Pht=-15	Yld=100	Gpc=80	w(-1,-15,100,80)	CC1=c(0,0,1,0)	Yield	-1.02928	-5.3462	1.41443e-16	0.918792	154.726	0.871351	88.747	78.733	4.877	15.743	13.0235
BVC	Both	Mat=-1	Pht=-15	Yld=110	Gpc=1	w(-1,-15,110,1)	CC1=c(0,0,1,0)	Yield	0.0787041	-8.74537	3.63726e-16	-0.42307	130.679	0.576424	88.5165	75.3665	4.8305	14.254	-1614.95
BVC	Both	Mat=-1	Pht=-15	Yld=110	Gpc=10	w(-1,-15,110,10)	CC1=c(0,0,1,0)	Yield	-0.0707609	-8.67391	3.75154e-16	-0.256974	127.61	0.59122	88.43	75.6265	4.7945	14.4225	-1436.15
BVC	Both	Mat=-1	Pht=-15	Yld=110	Gpc=20	w(-1,-15,110,20)	CC1=c(0,0,1,0)	Yield	-0.241971	-8.467	2.82225e-16	-0.0618926	126.009	0.614434	88.764	75.816	4.7975	14.78	-1234.41
[truncated: 1,770 more rows]
