# Supplementary material for: Identification of Spring Wheat with Superior Agronomic Performance under Contrasting Nitrogen Managements Using Linear Phenotypic Selection Indices
Source: Plants (Basel). 2022 Jul 20;11(14):1887. doi: 10.3390/plants11141887 (PMC9317689; doi:10.3390/plants11141887)
Supplement: Supplementary file 1 [file plants-11-01887-s001.zip › Table S5 29042022.pdf]

**Table S5** Analysis of Variance (ANOVA) comparing expected genetic gain for grain yield at different economic weights for maturity and plant height (-1, -5, -10, -15), grain yield (1 to 150 at an increment of 10), and grain protein content (10 to 80 at an increment of 10).

A) Comparison of economic weight based on Kempthorne and Nordskog Restrictive Linear Phenotypic Selection Index (RLPSI) by imposing restrictions to grain protein content (GPC)

Y (Response) = Expected genetic gain for grain yield

X (Factor): Grain yield economic weight

#### Analysis of Variance

| Source         | DF   | Sum of Squares | Mean Square | F Ratio  | Prob > F |
|----------------|------|----------------|-------------|----------|----------|
| Weight (Yield) | 15   | 44.487936      | 2.96586     | 341.6285 | <.0001*  |
| Error          | 2288 | 19.863369      | 0.00868     |          |          |
| Total          | 2303 | 64.351305      |             |          |          |

#### Means Comparisons using Tukey-Kramer HSD

| Level       | Mean yield |
|-------------|------------|
| Yld=150 A   | 0.53321794 |
| Yld=140 A   | 0.52343145 |
| Yld=130 A B | 0.51240962 |
| Yld=120 A B | 0.49994566 |
| Yld=110 B C | 0.47828355 |
| Yld=100 C   | 0.45608552 |
| Yld=90 C D  | 0.44511034 |
| Yld=80 D E  | 0.41773606 |
| Yld=70 E F  | 0.39466950 |
| Yld=60 F G  | 0.36311640 |
| Yld=50 G    | 0.33006452 |
| Yld=40 H    | 0.29163953 |
| Yld=30 I    | 0.24690532 |
| Yld=20 J    | 0.19495025 |
| Yld=10 K    | 0.13567574 |
| Yld=1 L     | 0.07764909 |

Levels not connected by same letter are significantly different.

Y (Response) = Expected genetic gain for grain yield

X (Factor): Maturity economic weight

#### Analysis of Variance

| Source       | DF   | Sum of Squares | Mean Square | F Ratio  | Prob > F |
|--------------|------|----------------|-------------|----------|----------|
| Weight (Mat) | 3    | 9.285581       | 3.09519     | 129.2809 | <.0001*  |
| Error        | 2300 | 55.065724      | 0.02394     |          |          |
| Total        | 2303 | 64.351305      |             |          |          |

#### Means Comparisons using Tukey-Kramer HSD

| Level | Mean yield |
|-------|------------|
|-------|------------|

|         |   |            |
|---------|---|------------|
| Mat=-1  | A | 0.43630416 |
| Mat=-5  | A | 0.41752657 |
| Mat=-10 | B | 0.34560690 |
| Mat=-15 | C | 0.27578500 |

Levels not connected by same letter are significantly different.

**Y (Response) = Expected genetic gain for grain yield**

**X (Factor): Plant height economic weight**

#### Analysis of Variance

| Source          | DF   | Sum of Squares | Mean Square | F Ratio | Prob > F |
|-----------------|------|----------------|-------------|---------|----------|
| Weight (Height) | 3    | 1.208045       | 0.402682    | 14.6677 | <.0001*  |
| Error           | 2300 | 63.143260      | 0.027454    |         |          |
| Total           | 2303 | 64.351305      |             |         |          |

#### Means Comparisons using Tukey-Kramer HSD

| Level | Mean yield |
|-------|------------|
|-------|------------|

|         |     |            |
|---------|-----|------------|
| Pht=-5  | A   | 0.39794774 |
| Pht=-1  | A B | 0.37909706 |
| Pht=-10 | B   | 0.36259126 |
| Pht=-15 | C   | 0.33558657 |

Levels not connected by same letter are significantly different.

**Y (Response) = Expected genetic gain for grain yield**

**X (Factor): GPC economic weight**

#### Analysis of Variance

| Source       | DF   | Sum of Squares | Mean Square | F Ratio | Prob > F |
|--------------|------|----------------|-------------|---------|----------|
| Weight (GPC) | 8    | 0.001487       | 0.000186    | 0.0066  | 1.0000   |
| Error        | 2295 | 64.349818      | 0.028039    |         |          |
| Total        | 2303 | 64.351305      |             |         |          |

#### Means Comparisons using Tukey-Kramer HSD

| Level | Mean yield |
|-------|------------|
|-------|------------|

|        |   |            |
|--------|---|------------|
| GPC=60 | A | 0.37022916 |
| GPC=30 | A | 0.37022314 |
| GPC=70 | A | 0.36853279 |
| GPC=20 | A | 0.36852193 |
| GPC=40 | A | 0.36852193 |
| GPC=80 | A | 0.36852193 |
| GPC=10 | A | 0.36851490 |
| GPC=01 | A | 0.36851490 |
| GPC=50 | A | 0.36767023 |

Levels not connected by same letter are significantly different.

Y (Response) = Expected genetic gain for maturity

X (Factor): Maturity economic weight

### Analysis of Variance

| Source       | DF   | Sum of Squares | Mean Square | F Ratio  | Prob > F |
|--------------|------|----------------|-------------|----------|----------|
| Weight (Mat) | 3    | 1871.5172      | 623.839     | 855.1635 | <.0001*  |
| Error        | 2300 | 1677.8428      | 0.729       |          |          |
| C. Total     | 2303 | 3549.3600      |             |          |          |

### Means Comparisons using Tukey-Kramer HSD

| Level          | Mean days |
|----------------|-----------|
| Mat=-01      A | 0.747199  |
| Mat=-05      B | -0.106851 |
| Mat=-10      C | -0.973077 |
| Mat=-15      D | -1.646905 |

Levels not connected by same letter are significantly different.

Y (Response) = Expected genetic gain for plant height

X (Factor): Plant height economic weight

### Analysis of Variance

| Source          | DF   | Sum of Squares | Mean Square | F Ratio  | Prob > F |
|-----------------|------|----------------|-------------|----------|----------|
| Weight (Height) | 3    | 5139.727       | 1713.24     | 767.0369 | <.0001*  |
| Error           | 2300 | 5137.247       | 2.23        |          |          |
| C. Total        | 2303 | 10276.974      |             |          |          |

### Means Comparisons using Tukey-Kramer HSD

| Level          | Mean height |
|----------------|-------------|
| Pht=-01      A | -4.547960   |
| Pht=-05      B | -6.754212   |
| Pht=-10      C | -7.957483   |
| Pht=-15      D | -8.400811   |

Levels not connected by same letter are significantly different.

**B) Comparison of economic weight based on Kempthorne and Nordskog Restrictive Linear Phenotypic Selection Index (RLPSI) by imposing restrictions to grain yield**

Y (Response) = Expected genetic gain for grain protein content (GPC)

X (Factor): Grain protein content economic weights

**Analysis of Variance**

| Source       | DF   | Sum of Squares | Mean Square | F Ratio  | Prob > F |
|--------------|------|----------------|-------------|----------|----------|
| Weight (GPC) | 8    | 422.99193      | 52.8740     | 377.1850 | <.0001*  |
| Error        | 2295 | 321.71432      | 0.1402      |          |          |
| Total        | 2303 | 744.70625      |             |          |          |

**Means Comparisons using Tukey-Kramer HSD**

| Level  |     | Mean GPC  |
|--------|-----|-----------|
| GPC=80 | A   | 1.287517  |
| GPC=70 | A B | 1.229453  |
| GPC=60 | B C | 1.156006  |
| GPC=50 | C   | 1.062484  |
| GPC=40 | D   | 0.942566  |
| GPC=30 | E   | 0.787448  |
| GPC=20 | F   | 0.584506  |
| GPC=10 | G   | 0.313688  |
| GPC=1  | H   | -0.055829 |

Levels not connected by same letter are significantly different.

Y (Response) = Expected genetic gain for grain protein content

X (Factor): Maturity economic weights

**Analysis of Variance**

| Source       | DF   | Sum of Squares | Mean Square | F Ratio | Prob > F |
|--------------|------|----------------|-------------|---------|----------|
| Weight (Mat) | 3    | 0.52160        | 0.173866    | 0.5374  | 0.6567   |
| Error        | 2300 | 744.18465      | 0.323559    |         |          |
| C. Total     | 2303 | 744.70625      |             |         |          |

**Means Comparisons using Tukey-Kramer HSD**

| Level   |   | Mean GPC   |
|---------|---|------------|
| Mat=-10 | A | 0.82475439 |
| Mat=-15 | A | 0.81866982 |
| Mat=-5  | A | 0.81819527 |

| Level         | Mean GPC   |
|---------------|------------|
| Mat=-1      A | 0.78630935 |

Levels not connected by same letter are significantly different.

Y (Response) = Expected genetic gain for grain protein content

X (Factor): Plant height economic weights

### Analysis of Variance

| Source          | DF   | Sum of Squares | Mean Square | F Ratio  | Prob > F |
|-----------------|------|----------------|-------------|----------|----------|
| Weight (Height) | 3    | 274.28229      | 91.4274     | 447.0076 | <.0001*  |
| Error           | 2300 | 470.42397      | 0.2045      |          |          |
| C. Total        | 2303 | 744.70625      |             |          |          |

### Means Comparisons using Tukey-Kramer HSD

| Level         | Mean GPC  |
|---------------|-----------|
| Pht=-1      A | 1.2801727 |
| Pht=-5      B | 0.9738981 |
| Pht=-10     C | 0.6239099 |
| Pht=-15     D | 0.3699480 |

Levels not connected by same letter are significantly different.

Y (Response) = Expected genetic gain for grain protein content

X (Factor): Grain yield economic weights

### Analysis of Variance

| Source         | DF   | Sum of Squares | Mean Square | F Ratio | Prob > F |
|----------------|------|----------------|-------------|---------|----------|
| Weight (Yield) | 15   | 1.2247e-28     | 8.16e-30    | 0.0000  | 1.0000   |
| Error          | 2288 | 744.70625      | 0.325484    |         |          |
| C. Total       | 2303 | 744.70625      |             |         |          |

### Means Comparisons using Tukey-Kramer HSD

| Level        | Mean GPC   |
|--------------|------------|
| Yld=1      A | 0.81198221 |
| Yld=20     A | 0.81198221 |
| Yld=40     A | 0.81198221 |
| Yld=80     A | 0.81198221 |
| Yld=10     A | 0.81198221 |
| Yld=50     A | 0.81198221 |
| Yld=30     A | 0.81198221 |

| Level   |   | Mean GPC   |
|---------|---|------------|
| Yld=100 | A | 0.81198221 |
| Yld=140 | A | 0.81198221 |
| Yld=60  | A | 0.81198221 |
| Yld=70  | A | 0.81198221 |
| Yld=90  | A | 0.81198221 |
| Yld=110 | A | 0.81198221 |
| Yld=150 | A | 0.81198221 |
| Yld=120 | A | 0.81198221 |
| Yld=130 | A | 0.81198221 |

Levels not connected by same letter are significantly different.

Y (Response) = Expected genetic gain for maturity

X (Factor): maturity economic weights

#### Analysis of Variance

| Source       | DF   | Sum of Squares | Mean Square | F Ratio  | Prob > F |
|--------------|------|----------------|-------------|----------|----------|
| Weight (Mat) | 3    | 909.6436       | 303.215     | 729.2272 | <.0001*  |
| Error        | 2300 | 956.3459       | 0.416       |          |          |
| Total        | 2303 | 1865.9895      |             |          |          |

#### Means Comparisons using Tukey-Kramer HSD

| Level   |   | Mean days |
|---------|---|-----------|
| Mat=-1  | A | -1.025559 |
| Mat=-5  | B | -1.717708 |
| Mat=-10 | C | -2.293482 |
| Mat=-15 | D | -2.694246 |

Levels not connected by same letter are significantly different.

Y (Response) = Expected genetic gain for plant height

X (Factor): Plant height economic weights

#### Analysis of Variance

| Source          | DF   | Sum of Squares | Mean Square | F Ratio  | Prob > F |
|-----------------|------|----------------|-------------|----------|----------|
| Weight (Height) | 3    | 19079.516      | 6359.84     | 1815.211 | <.0001*  |
| Error           | 2300 | 8058.364       | 3.50        |          |          |
| Total           | 2303 | 27137.880      |             |          |          |

**Means Comparisons using Tukey-Kramer HSD**

| Level   |   | Mean height |
|---------|---|-------------|
| Pht=-1  | A | 0.583729    |
| Pht=-5  | B | -3.149667   |
| Pht=-10 | C | -5.679718   |
| Pht=-15 | D | -6.954490   |

Levels not connected by same letter are significantly different.
