# Supplementary material for: Identification of Spring Wheat with Superior Agronomic Performance under Contrasting Nitrogen Managements Using Linear Phenotypic Selection Indices
Source: Plants (Basel). 2022 Jul 20;11(14):1887. doi: 10.3390/plants11141887 (PMC9317689; doi:10.3390/plants11141887)
Supplement: Supplementary file 1 [file plants-11-01887-s001.zip › Table S6 29042022.xlsx]

## Sheet: All selected cultivars
Table S6 Summary of the selection parameters (expected genetic gain per trait, response to selection, and correlation between the index and the genetic merit) based on five economic weights. The analyses were done using the Smith Linear Phenotypic Selection Index (LPSI) and the Kempthorne and Nordskog Restrictive Linear Phenotypic Selection Index (RLPSI) and the best linear unbiased estimators (B…
Index	Restricted trait	Population	Management	Economic weight code	Economic weight	S/N	GID	Maturity (d)	Height (cm)	Yield (t/ha)	GPC (%)	Index	Cultivar	Market class	Registration year
LPSI	None	BVC	Con	Weight-6	w(-1,-1,150,70)	122	GID-124	93.38	74.63	4.97	16.63	1486.93	AAC Castle	CPSR	2018
LPSI	None	BVC	Con	Weight-6	w(-1,-1,150,70)	97	GID-099	91.71	84.45	5.16	16.36	1476.9	Conquer	CNHR	2010
LPSI	None	BVC	Con	Weight-6	w(-1,-1,150,70)	62	GID-062	90.48	78.59	5.64	15.15	1463.38	AAC Goodwin	CPSR	2017
LPSI	None	BVC	Con	Weight-6	w(-1,-1,150,70)	2	GID-002	89.61	84.79	4.86	16.7	1462.9	5605HR CL	CNHR	2013
LPSI	None	BVC	Con	Weight-6	w(-1,-1,150,70)	91	GID-092	89.62	78.83	4.4	17.37	1461.35	CDC VR Morris	CWRS	2012
LPSI	None	BVC	Con	Weight-6	w(-1,-1,150,70)	159	GID-161	87.28	79.08	5.07	16.11	1456.16	CDC Hughes	CWRS	2016
LPSI	None	BVC	Con	Weight-6	w(-1,-1,150,70)	7	GID-007	91.03	78.13	5.24	15.72	1455.46	AAC Brandon	CWRS	2013
LPSI	None	BVC	Con	Weight-6	w(-1,-1,150,70)	64	GID-064	87.66	81.42	4.94	16.33	1452.5	CDC Landmark	CWRS	2016
LPSI	None	BVC	Con	Weight-6	w(-1,-1,150,70)	54	GID-054	90.4	94.84	4.87	16.6	1445.37	Burnside	CWES	2004
LPSI	None	BVC	Con	Weight-6	w(-1,-1,150,70)	164	GID-166	85.45	80.7	4.51	16.98	1444.27	Jake	CWRS	2018
LPSI	None	BVC	Con	Weight-6	w(-1,-1,150,70)	61	GID-061	86.64	81.14	4.97	16.1	1441.67	AAC Redberry	CWRS	2016
LPSI	None	BVC	Con	Weight-6	w(-1,-1,150,70)	181	GID-183	89.61	79.64	4.9	16.09	1437.96	Stettler	CWRS	2008
LPSI	None	BVC	Con	Weight-6	w(-1,-1,150,70)	16	GID-016	91.39	72.43	5.2	15.33	1436	AAC Penhold	CPSR	2014
LPSI	None	BVC	Con	Weight-6	w(-1,-1,150,70)	158	GID-160	89.83	86.16	4.75	16.47	1435.95	PT479	CWRS	0
LPSI	None	BVC	Con	Weight-6	w(-1,-1,150,70)	187	GID-189	87.83	88.76	4.43	17.09	1433.44	SY479 VB	CWRS	2016
LPSI	None	BVC	Con	Weight-6	w(-1,-1,150,70)	94	GID-096	94.03	85.01	5.25	15.44	1433.25	CDN Bison	CWES	2009
LPSI	None	BVC	Con	Weight-6	w(-1,-1,150,70)	186	GID-188	88.12	72.88	4.81	16.03	1432.6	SY 433	CWRS	2012
LPSI	None	BVC	Con	Weight-6	w(-1,-1,150,70)	4	GID-004	92.62	77.38	4.95	15.81	1432.12	5701PR	CPSR	2002
LPSI	None	BVC	Con	Weight-6	w(-1,-1,150,70)	68	GID-068	88.14	85.38	4.26	17.24	1428.91	BYT14-19	CWRS	0
LPSI	None	BVC	Con	Weight-6	w(-1,-1,150,70)	120	GID-122	92.37	72.54	5.22	15.16	1428.72	SY Rowyn	CPSR	2016
LPSI	None	BVC	Con	Weight-7	w(-5,-1,150,70)	122	GID-124	93.38	74.63	4.97	16.63	1152.49	AAC Castle	CPSR	2018
LPSI	None	BVC	Con	Weight-7	w(-5,-1,150,70)	97	GID-099	91.71	84.45	5.16	16.36	1148.1	Conquer	CNHR	2010
LPSI	None	BVC	Con	Weight-7	w(-5,-1,150,70)	159	GID-161	87.28	79.08	5.07	16.11	1143.26	CDC Hughes	CWRS	2016
LPSI	None	BVC	Con	Weight-7	w(-5,-1,150,70)	2	GID-002	89.61	84.79	4.86	16.7	1142.01	5605HR CL	CNHR	2013
LPSI	None	BVC	Con	Weight-7	w(-5,-1,150,70)	91	GID-092	89.62	78.83	4.4	17.37	1141.13	CDC VR Morris	CWRS	2012
LPSI	None	BVC	Con	Weight-7	w(-5,-1,150,70)	164	GID-166	85.45	80.7	4.51	16.98	1138.73	Jake	CWRS	2018
LPSI	None	BVC	Con	Weight-7	w(-5,-1,150,70)	64	GID-064	87.66	81.42	4.94	16.33	1138.42	CDC Landmark	CWRS	2016
LPSI	None	BVC	Con	Weight-7	w(-5,-1,150,70)	62	GID-062	90.48	78.59	5.64	15.15	1138.17	AAC Goodwin	CPSR	2017
LPSI	None	BVC	Con	Weight-7	w(-5,-1,150,70)	61	GID-061	86.64	81.14	4.97	16.1	1131.15	AAC Redberry	CWRS	2016
LPSI	None	BVC	Con	Weight-7	w(-5,-1,150,70)	7	GID-007	91.03	78.13	5.24	15.72	1128.85	AAC Brandon	CWRS	2013
LPSI	None	BVC	Con	Weight-7	w(-5,-1,150,70)	54	GID-054	90.4	94.84	4.87	16.6	1121.55	Burnside	CWES	2004
LPSI	None	BVC	Con	Weight-7	w(-5,-1,150,70)	187	GID-189	87.83	88.76	4.43	17.09	1119.45	SY479 VB	CWRS	2016
LPSI	None	BVC	Con	Weight-7	w(-5,-1,150,70)	186	GID-188	88.12	72.88	4.81	16.03	1116.96	SY 433	CWRS	2012
LPSI	None	BVC	Con	Weight-7	w(-5,-1,150,70)	181	GID-183	89.61	79.64	4.9	16.09	1116.87	Stettler	CWRS	2008
LPSI	None	BVC	Con	Weight-7	w(-5,-1,150,70)	158	GID-160	89.83	86.16	4.75	16.47	1114.3	PT479	CWRS	0
LPSI	None	BVC	Con	Weight-7	w(-5,-1,150,70)	68	GID-068	88.14	85.38	4.26	17.24	1114.04	BYT14-19	CWRS	0
LPSI	None	BVC	Con	Weight-7	w(-5,-1,150,70)	26	GID-026	86.84	89.35	4.48	16.86	1113.04	AC Cadillac	CWRS	1996
LPSI	None	BVC	Con	Weight-7	w(-5,-1,150,70)	156	GID-158	87.85	79.98	4.62	16.43	1111.95	AAC Tisdale	CWRS	2017
LPSI	None	BVC	Con	Weight-7	w(-5,-1,150,70)	107	GID-109	85.94	91.73	4.72	16.39	1109.82	Glencross	CWES	2008
LPSI	None	BVC	Con	Weight-7	w(-5,-1,150,70)	16	GID-016	91.39	72.43	5.2	15.33	1108.06	AAC Penhold	CPSR	2014
LPSI	None	BVC	Con	Weight-8	w(-1,-1,130,70)	122	GID-124	93.38	74.63	4.97	16.63	1395.16	AAC Castle	CPSR	2018
LPSI	None	BVC	Con	Weight-8	w(-1,-1,130,70)	97	GID-099	91.71	84.45	5.16	16.36	1384.51	Conquer	CNHR	2010
LPSI	None	BVC	Con	Weight-8	w(-1,-1,130,70)	91	GID-092	89.62	78.83	4.4	17.37	1379.85	CDC VR Morris	CWRS	2012
LPSI	None	BVC	Con	Weight-8	w(-1,-1,130,70)	2	GID-002	89.61	84.79	4.86	16.7	1375.69	5605HR CL	CNHR	2013
LPSI	None	BVC	Con	Weight-8	w(-1,-1,130,70)	159	GID-161	87.28	79.08	5.07	16.11	1366.11	CDC Hughes	CWRS	2016
LPSI	None	BVC	Con	Weight-8	w(-1,-1,130,70)	64	GID-064	87.66	81.42	4.94	16.33	1364.45	CDC Landmark	CWRS	2016
LPSI	None	BVC	Con	Weight-8	w(-1,-1,130,70)	62	GID-062	90.48	78.59	5.64	15.15	1363.73	AAC Goodwin	CPSR	2017
LPSI	None	BVC	Con	Weight-8	w(-1,-1,130,70)	164	GID-166	85.45	80.7	4.51	16.98	1363.2	Jake	CWRS	2018
LPSI	None	BVC	Con	Weight-8	w(-1,-1,130,70)	7	GID-007	91.03	78.13	5.24	15.72	1361.17	AAC Brandon	CWRS	2013
LPSI	None	BVC	Con	Weight-8	w(-1,-1,130,70)	54	GID-054	90.4	94.84	4.87	16.6	1359.01	Burnside	CWES	2004
LPSI	None	BVC	Con	Weight-8	w(-1,-1,130,70)	187	GID-189	87.83	88.76	4.43	17.09	1353.56	SY479 VB	CWRS	2016
LPSI	None	BVC	Con	Weight-8	w(-1,-1,130,70)	61	GID-061	86.64	81.14	4.97	16.1	1353.54	AAC Redberry	CWRS	2016
LPSI	None	BVC	Con	Weight-8	w(-1,-1,130,70)	68	GID-068	88.14	85.38	4.26	17.24	1350.79	BYT14-19	CWRS	0
LPSI	None	BVC	Con	Weight-8	w(-1,-1,130,70)	158	GID-160	89.83	86.16	4.75	16.47	1350.23	PT479	CWRS	0
LPSI	None	BVC	Con	Weight-8	w(-1,-1,130,70)	181	GID-183	89.61	79.64	4.9	16.09	1349.26	Stettler	CWRS	2008
LPSI	None	BVC	Con	Weight-8	w(-1,-1,130,70)	186	GID-188	88.12	72.88	4.81	16.03	1344.84	SY 433	CWRS	2012
LPSI	None	BVC	Con	Weight-8	w(-1,-1,130,70)	26	GID-026	86.84	89.35	4.48	16.86	1343.48	AC Cadillac	CWRS	1996
LPSI	None	BVC	Con	Weight-8	w(-1,-1,130,70)	156	GID-158	87.85	79.98	4.62	16.43	1342.42	AAC Tisdale	CWRS	2017
LPSI	None	BVC	Con	Weight-8	w(-1,-1,130,70)	16	GID-016	91.39	72.43	5.2	15.33	1341.16	AAC Penhold	CPSR	2014
LPSI	None	BVC	Con	Weight-8	w(-1,-1,130,70)	4	GID-004	92.62	77.38	4.95	15.81	1341	5701PR	CPSR	2002
LPSI	None	BVC	Con	Weight-9	w(-5,-1,130,70)	122	GID-124	93.38	74.63	4.97	16.63	1060.71	AAC Castle	CPSR	2018
LPSI	None	BVC	Con	Weight-9	w(-5,-1,130,70)	91	GID-092	89.62	78.83	4.4	17.37	1059.63	CDC VR Morris	CWRS	2012
LPSI	None	BVC	Con	Weight-9	w(-5,-1,130,70)	164	GID-166	85.45	80.7	4.51	16.98	1057.67	Jake	CWRS	2018
LPSI	None	BVC	Con	Weight-9	w(-5,-1,130,70)	97	GID-099	91.71	84.45	5.16	16.36	1055.71	Conquer	CNHR	2010
LPSI	None	BVC	Con	Weight-9	w(-5,-1,130,70)	2	GID-002	89.61	84.79	4.86	16.7	1054.81	5605HR CL	CNHR	2013
LPSI	None	BVC	Con	Weight-9	w(-5,-1,130,70)	159	GID-161	87.28	79.08	5.07	16.11	1053.21	CDC Hughes	CWRS	2016
LPSI	None	BVC	Con	Weight-9	w(-5,-1,130,70)	64	GID-064	87.66	81.42	4.94	16.33	1050.37	CDC Landmark	CWRS	2016
LPSI	None	BVC	Con	Weight-9	w(-5,-1,130,70)	61	GID-061	86.64	81.14	4.97	16.1	1043.01	AAC Redberry	CWRS	2016
LPSI	None	BVC	Con	Weight-9	w(-5,-1,130,70)	187	GID-189	87.83	88.76	4.43	17.09	1039.56	SY479 VB	CWRS	2016
LPSI	None	BVC	Con	Weight-9	w(-5,-1,130,70)	62	GID-062	90.48	78.59	5.64	15.15	1038.51	AAC Goodwin	CPSR	2017
LPSI	None	BVC	Con	Weight-9	w(-5,-1,130,70)	68	GID-068	88.14	85.38	4.26	17.24	1035.92	BYT14-19	CWRS	0
LPSI	None	BVC	Con	Weight-9	w(-5,-1,130,70)	54	GID-054	90.4	94.84	4.87	16.6	1035.18	Burnside	CWES	2004
LPSI	None	BVC	Con	Weight-9	w(-5,-1,130,70)	7	GID-007	91.03	78.13	5.24	15.72	1034.56	AAC Brandon	CWRS	2013
LPSI	None	BVC	Con	Weight-9	w(-5,-1,130,70)	26	GID-026	86.84	89.35	4.48	16.86	1032.9	AC Cadillac	CWRS	1996
LPSI	None	BVC	Con	Weight-9	w(-5,-1,130,70)	179	GID-181	86.47	90.53	4.01	17.55	1030.69	Somerset	CWRS	2005
LPSI	None	BVC	Con	Weight-9	w(-5,-1,130,70)	186	GID-188	88.12	72.88	4.81	16.03	1029.2	SY 433	CWRS	2012
LPSI	None	BVC	Con	Weight-9	w(-5,-1,130,70)	158	GID-160	89.83	86.16	4.75	16.47	1028.59	PT479	CWRS	0
LPSI	None	BVC	Con	Weight-9	w(-5,-1,130,70)	181	GID-183	89.61	79.64	4.9	16.09	1028.18	Stettler	CWRS	2008
LPSI	None	BVC	Con	Weight-9	w(-5,-1,130,70)	156	GID-158	87.85	79.98	4.62	16.43	1028.02	AAC Tisdale	CWRS	2017
LPSI	None	BVC	Con	Weight-9	w(-5,-1,130,70)	107	GID-109	85.94	91.73	4.72	16.39	1026.95	Glencross	CWES	2008
LPSI	None	BVC	Con	Weight-10	w(-1,-1,120,70)	122	GID-124	93.38	74.63	4.97	16.63	1349.28	AAC Castle	CPSR	2018
LPSI	None	BVC	Con	Weight-10	w(-1,-1,120,70)	91	GID-092	89.62	78.83	4.4	17.37	1339.1	CDC VR Morris	CWRS	2012
LPSI	None	BVC	Con	Weight-10	w(-1,-1,120,70)	97	GID-099	91.71	84.45	5.16	16.36	1338.32	Conquer	CNHR	2010
LPSI	None	BVC	Con	Weight-10	w(-1,-1,120,70)	2	GID-002	89.61	84.79	4.86	16.7	1332.09	5605HR CL	CNHR	2013
LPSI	None	BVC	Con	Weight-10	w(-1,-1,120,70)	164	GID-166	85.45	80.7	4.51	16.98	1322.67	Jake	CWRS	2018
LPSI	None	BVC	Con	Weight-10	w(-1,-1,120,70)	159	GID-161	87.28	79.08	5.07	16.11	1321.08	CDC Hughes	CWRS	2016
LPSI	None	BVC	Con	Weight-10	w(-1,-1,120,70)	64	GID-064	87.66	81.42	4.94	16.33	1320.43	CDC Landmark	CWRS	2016
LPSI	None	BVC	Con	Weight-10	w(-1,-1,120,70)	54	GID-054	90.4	94.84	4.87	16.6	1315.82	Burnside	CWES	2004
LPSI	None	BVC	Con	Weight-10	w(-1,-1,120,70)	7	GID-007	91.03	78.13	5.24	15.72	1314.02	AAC Brandon	CWRS	2013
LPSI	None	BVC	Con	Weight-10	w(-1,-1,120,70)	62	GID-062	90.48	78.59	5.64	15.15	1313.9	AAC Goodwin	CPSR	2017
LPSI	None	BVC	Con	Weight-10	w(-1,-1,120,70)	187	GID-189	87.83	88.76	4.43	17.09	1313.61	SY479 VB	CWRS	2016
LPSI	None	BVC	Con	Weight-10	w(-1,-1,120,70)	68	GID-068	88.14	85.38	4.26	17.24	1311.74	BYT14-19	CWRS	0
LPSI	None	BVC	Con	Weight-10	w(-1,-1,120,70)	61	GID-061	86.64	81.14	4.97	16.1	1309.47	AAC Redberry	CWRS	2016
LPSI	None	BVC	Con	Weight-10	w(-1,-1,120,70)	158	GID-160	89.83	86.16	4.75	16.47	1307.38	PT479	CWRS	0
LPSI	None	BVC	Con	Weight-10	w(-1,-1,120,70)	181	GID-183	89.61	79.64	4.9	16.09	1304.91	Stettler	CWRS	2008
LPSI	None	BVC	Con	Weight-10	w(-1,-1,120,70)	26	GID-026	86.84	89.35	4.48	16.86	1303.41	AC Cadillac	CWRS	1996
LPSI	None	BVC	Con	Weight-10	w(-1,-1,120,70)	179	GID-181	86.47	90.53	4.01	17.55	1302.69	Somerset	CWRS	2005
LPSI	None	BVC	Con	Weight-10	w(-1,-1,120,70)	186	GID-188	88.12	72.88	4.81	16.03	1300.96	SY 433	CWRS	2012
LPSI	None	BVC	Con	Weight-10	w(-1,-1,120,70)	156	GID-158	87.85	79.98	4.62	16.43	1300.45	AAC Tisdale	CWRS	2017
LPSI	None	BVC	Con	Weight-10	w(-1,-1,120,70)	188	GID-190	88.87	82.12	4.28	16.91	1297.52	SY637	CWRS	2016
LPSI	None	BVC	Org	Weight-6	w(-1,-1,150,70)	97	GID-099	89.92	91.43	6.17	14.7	1247.72	Conquer	CNHR	2010
LPSI	None	BVC	Org	Weight-6	w(-1,-1,150,70)	62	GID-062	89	82.51	6	14.63	1239.26	AAC Goodwin	CPSR	2017
LPSI	None	BVC	Org	Weight-6	w(-1,-1,150,70)	179	GID-181	86.06	98.66	4.48	17.68	1238.2	Somerset	CWRS	2005
LPSI	None	BVC	Org	Weight-6	w(-1,-1,150,70)	78	GID-079	86.4	89.16	5.33	15.92	1236.59	CDC Imagine	CWRS	2002
LPSI	None	BVC	Org	Weight-6	w(-1,-1,150,70)	7	GID-007	88.69	79.6	5.38	15.49	1230.25	AAC Brandon	CWRS	2013
LPSI	None	BVC	Org	Weight-6	w(-1,-1,150,70)	65	GID-065	84.69	95.53	5.5	15.62	1228.71	Zealand	CWRS	2016
LPSI	None	BVC	Org	Weight-6	w(-1,-1,150,70)	137	GID-139	85.25	88.64	5.07	16.18	1226.62	Lillian	CNHR	2003
LPSI	None	BVC	Org	Weight-6	w(-1,-1,150,70)	91	GID-092	87.78	86.05	4.57	16.98	1225.12	CDC VR Morris	CWRS	2012
LPSI	None	BVC	Org	Weight-6	w(-1,-1,150,70)	2	GID-002	88.36	89.58	5.17	15.93	1221.26	5605HR CL	CNHR	2013
LPSI	None	BVC	Org	Weight-6	w(-1,-1,150,70)	26	GID-026	85.23	100.07	4.97	16.52	1220.84	AC Cadillac	CWRS	1996
LPSI	None	BVC	Org	Weight-6	w(-1,-1,150,70)	138	GID-140	86.53	95.28	5	16.33	1219.48	Lovitt	CWRS	2002
LPSI	None	BVC	Org	Weight-6	w(-1,-1,150,70)	21	GID-021	88.16	73.59	5.57	14.79	1218.47	AAC Viewfield	CWRS	2016
LPSI	None	BVC	Org	Weight-6	w(-1,-1,150,70)	74	GID-074	85.34	96.91	5.21	15.94	1216.54	CDC Alsask	CWRS	2005
LPSI	None	BVC	Org	Weight-6	w(-1,-1,150,70)	88	GID-089	86.47	93.47	5.24	15.79	1215.63	CDC Thrive	CWRS	2010
LPSI	None	BVC	Org	Weight-6	w(-1,-1,150,70)	111	GID-113	85.01	88.85	5.11	15.9	1215.18	Goodeve	CWRS	2007
LPSI	None	BVC	Org	Weight-6	w(-1,-1,150,70)	122	GID-124	90.27	77.72	5.53	14.78	1208.72	AAC Castle	CPSR	2018
LPSI	None	BVC	Org	Weight-6	w(-1,-1,150,70)	16	GID-016	88.48	73.71	5.23	15.15	1205.33	AAC Penhold	CPSR	2014
LPSI	None	BVC	Org	Weight-6	w(-1,-1,150,70)	75	GID-076	85.92	99.71	5.04	16.07	1203.79	CDC Bounty	CWRS	2000
LPSI	None	BVC	Org	Weight-6	w(-1,-1,150,70)	157	GID-159	83.18	93	5.01	15.95	1203.27	PT472	CWRS	0
LPSI	None	BVC	Org	Weight-6	w(-1,-1,150,70)	159	GID-161	86.28	79.27	5.2	15.28	1202.58	CDC Hughes	CWRS	2016
LPSI	None	BVC	Org	Weight-7	w(-5,-1,150,70)	179	GID-181	86.06	98.66	4.48	17.68	965.518	Somerset	CWRS	2005
LPSI	None	BVC	Org	Weight-7	w(-5,-1,150,70)	78	GID-079	86.4	89.16	5.33	15.92	960.765	CDC Imagine	CWRS	2002
LPSI	None	BVC	Org	Weight-7	w(-5,-1,150,70)	97	GID-099	89.92	91.43	6.17	14.7	958.948	Conquer	CNHR	2010
LPSI	None	BVC	Org	Weight-7	w(-5,-1,150,70)	65	GID-065	84.69	95.53	5.5	15.62	958.392	Zealand	CWRS	2016
LPSI	None	BVC	Org	Weight-7	w(-5,-1,150,70)	137	GID-139	85.25	88.64	5.07	16.18	954.932	Lillian	CNHR	2003
LPSI	None	BVC	Org	Weight-7	w(-5,-1,150,70)	62	GID-062	89	82.51	6	14.63	953.348	AAC Goodwin	CPSR	2017
LPSI	None	BVC	Org	Weight-7	w(-5,-1,150,70)	26	GID-026	85.23	100.07	4.97	16.52	949.828	AC Cadillac	CWRS	1996
LPSI	None	BVC	Org	Weight-7	w(-5,-1,150,70)	7	GID-007	88.69	79.6	5.38	15.49	946.274	AAC Brandon	CWRS	2013
LPSI	None	BVC	Org	Weight-7	w(-5,-1,150,70)	91	GID-092	87.78	86.05	4.57	16.98	945.878	CDC VR Morris	CWRS	2012
LPSI	None	BVC	Org	Weight-7	w(-5,-1,150,70)	74	GID-074	85.34	96.91	5.21	15.94	944.53	CDC Alsask	CWRS	2005
LPSI	None	BVC	Org	Weight-7	w(-5,-1,150,70)	111	GID-113	85.01	88.85	5.11	15.9	944.075	Goodeve	CWRS	2007
LPSI	None	BVC	Org	Weight-7	w(-5,-1,150,70)	138	GID-140	86.53	95.28	5	16.33	943.895	Lovitt	CWRS	2002
LPSI	None	BVC	Org	Weight-7	w(-5,-1,150,70)	88	GID-089	86.47	93.47	5.24	15.79	939.666	CDC Thrive	CWRS	2010
LPSI	None	BVC	Org	Weight-7	w(-5,-1,150,70)	2	GID-002	88.36	89.58	5.17	15.93	939.089	5605HR CL	CNHR	2013
LPSI	None	BVC	Org	Weight-7	w(-5,-1,150,70)	157	GID-159	83.18	93	5.01	15.95	938.425	PT472	CWRS	0
LPSI	None	BVC	Org	Weight-7	w(-5,-1,150,70)	21	GID-021	88.16	73.59	5.57	14.79	935.475	AAC Viewfield	CWRS	2016
LPSI	None	BVC	Org	Weight-7	w(-5,-1,150,70)	75	GID-076	85.92	99.71	5.04	16.07	930.139	CDC Bounty	CWRS	2000
LPSI	None	BVC	Org	Weight-7	w(-5,-1,150,70)	156	GID-158	85.01	84.15	5.02	15.68	929.519	AAC Tisdale	CWRS	2017
LPSI	None	BVC	Org	Weight-7	w(-5,-1,150,70)	159	GID-161	86.28	79.27	5.2	15.28	926.534	CDC Hughes	CWRS	2016
LPSI	None	BVC	Org	Weight-7	w(-5,-1,150,70)	187	GID-189	85.88	94.51	4.46	16.88	926.047	SY479 VB	CWRS	2016
LPSI	None	BVC	Org	Weight-8	w(-1,-1,130,70)	179	GID-181	86.06	98.66	4.48	17.68	1174.1	Somerset	CWRS	2005
LPSI	None	BVC	Org	Weight-8	w(-1,-1,130,70)	78	GID-079	86.4	89.16	5.33	15.92	1159.15	CDC Imagine	CWRS	2002
LPSI	None	BVC	Org	Weight-8	w(-1,-1,130,70)	97	GID-099	89.92	91.43	6.17	14.7	1158.08	Conquer	CNHR	2010
LPSI	None	BVC	Org	Weight-8	w(-1,-1,130,70)	91	GID-092	87.78	86.05	4.57	16.98	1156.7	CDC VR Morris	CWRS	2012
LPSI	None	BVC	Org	Weight-8	w(-1,-1,130,70)	137	GID-139	85.25	88.64	5.07	16.18	1152.95	Lillian	CNHR	2003
LPSI	None	BVC	Org	Weight-8	w(-1,-1,130,70)	65	GID-065	84.69	95.53	5.5	15.62	1150.73	Zealand	CWRS	2016
LPSI	None	BVC	Org	Weight-8	w(-1,-1,130,70)	62	GID-062	89	82.51	6	14.63	1150.58	AAC Goodwin	CPSR	2017
LPSI	None	BVC	Org	Weight-8	w(-1,-1,130,70)	26	GID-026	85.23	100.07	4.97	16.52	1150.54	AC Cadillac	CWRS	1996
LPSI	None	BVC	Org	Weight-8	w(-1,-1,130,70)	7	GID-007	88.69	79.6	5.38	15.49	1149.43	AAC Brandon	CWRS	2013
LPSI	None	BVC	Org	Weight-8	w(-1,-1,130,70)	138	GID-140	86.53	95.28	5	16.33	1147.38	Lovitt	CWRS	2002
LPSI	None	BVC	Org	Weight-8	w(-1,-1,130,70)	2	GID-002	88.36	89.58	5.17	15.93	1145.12	5605HR CL	CNHR	2013
LPSI	None	BVC	Org	Weight-8	w(-1,-1,130,70)	74	GID-074	85.34	96.91	5.21	15.94	1142.35	CDC Alsask	CWRS	2005
LPSI	None	BVC	Org	Weight-8	w(-1,-1,130,70)	111	GID-113	85.01	88.85	5.11	15.9	1140.98	Goodeve	CWRS	2007
LPSI	None	BVC	Org	Weight-8	w(-1,-1,130,70)	88	GID-089	86.47	93.47	5.24	15.79	1139.94	CDC Thrive	CWRS	2010
LPSI	None	BVC	Org	Weight-8	w(-1,-1,130,70)	21	GID-021	88.16	73.59	5.57	14.79	1134.08	AAC Viewfield	CWRS	2016
LPSI	None	BVC	Org	Weight-8	w(-1,-1,130,70)	187	GID-189	85.88	94.51	4.46	16.88	1133.86	SY479 VB	CWRS	2016
LPSI	None	BVC	Org	Weight-8	w(-1,-1,130,70)	75	GID-076	85.92	99.71	5.04	16.07	1132.03	CDC Bounty	CWRS	2000
LPSI	None	BVC	Org	Weight-8	w(-1,-1,130,70)	157	GID-159	83.18	93	5.01	15.95	1131.78	PT472	CWRS	0
LPSI	None	BVC	Org	Weight-8	w(-1,-1,130,70)	156	GID-158	85.01	84.15	5.02	15.68	1126.86	AAC Tisdale	CWRS	2017
LPSI	None	BVC	Org	Weight-8	w(-1,-1,130,70)	68	GID-068	84.85	89.89	4.47	16.62	1126.21	BYT14-19	CWRS	0
LPSI	None	BVC	Org	Weight-9	w(-5,-1,130,70)	179	GID-181	86.06	98.66	4.48	17.68	901.415	Somerset	CWRS	2005
LPSI	None	BVC	Org	Weight-9	w(-5,-1,130,70)	78	GID-079	86.4	89.16	5.33	15.92	883.323	CDC Imagine	CWRS	2002
LPSI	None	BVC	Org	Weight-9	w(-5,-1,130,70)	137	GID-139	85.25	88.64	5.07	16.18	881.256	Lillian	CNHR	2003
LPSI	None	BVC	Org	Weight-9	w(-5,-1,130,70)	65	GID-065	84.69	95.53	5.5	15.62	880.414	Zealand	CWRS	2016
LPSI	None	BVC	Org	Weight-9	w(-5,-1,130,70)	26	GID-026	85.23	100.07	4.97	16.52	879.528	AC Cadillac	CWRS	1996
LPSI	None	BVC	Org	Weight-9	w(-5,-1,130,70)	91	GID-092	87.78	86.05	4.57	16.98	877.455	CDC VR Morris	CWRS	2012
LPSI	None	BVC	Org	Weight-9	w(-5,-1,130,70)	138	GID-140	86.53	95.28	5	16.33	871.791	Lovitt	CWRS	2002
LPSI	None	BVC	Org	Weight-9	w(-5,-1,130,70)	74	GID-074	85.34	96.91	5.21	15.94	870.333	CDC Alsask	CWRS	2005
LPSI	None	BVC	Org	Weight-9	w(-5,-1,130,70)	111	GID-113	85.01	88.85	5.11	15.9	869.879	Goodeve	CWRS	2007
LPSI	None	BVC	Org	Weight-9	w(-5,-1,130,70)	97	GID-099	89.92	91.43	6.17	14.7	869.31	Conquer	CNHR	2010
LPSI	None	BVC	Org	Weight-9	w(-5,-1,130,70)	157	GID-159	83.18	93	5.01	15.95	866.937	PT472	CWRS	0
LPSI	None	BVC	Org	Weight-9	w(-5,-1,130,70)	7	GID-007	88.69	79.6	5.38	15.49	865.449	AAC Brandon	CWRS	2013
LPSI	None	BVC	Org	Weight-9	w(-5,-1,130,70)	62	GID-062	89	82.51	6	14.63	864.66	AAC Goodwin	CPSR	2017
LPSI	None	BVC	Org	Weight-9	w(-5,-1,130,70)	88	GID-089	86.47	93.47	5.24	15.79	863.981	CDC Thrive	CWRS	2010
LPSI	None	BVC	Org	Weight-9	w(-5,-1,130,70)	2	GID-002	88.36	89.58	5.17	15.93	862.95	5605HR CL	CNHR	2013
LPSI	None	BVC	Org	Weight-9	w(-5,-1,130,70)	187	GID-189	85.88	94.51	4.46	16.88	861.133	SY479 VB	CWRS	2016
LPSI	None	BVC	Org	Weight-9	w(-5,-1,130,70)	75	GID-076	85.92	99.71	5.04	16.07	858.384	CDC Bounty	CWRS	2000
LPSI	None	BVC	Org	Weight-9	w(-5,-1,130,70)	68	GID-068	84.85	89.89	4.47	16.62	856.572	BYT14-19	CWRS	0
LPSI	None	BVC	Org	Weight-9	w(-5,-1,130,70)	156	GID-158	85.01	84.15	5.02	15.68	855.537	AAC Tisdale	CWRS	2017
LPSI	None	BVC	Org	Weight-9	w(-5,-1,130,70)	21	GID-021	88.16	73.59	5.57	14.79	851.087	AAC Viewfield	CWRS	2016
LPSI	None	BVC	Org	Weight-10	w(-1,-1,120,70)	179	GID-181	86.06	98.66	4.48	17.68	1142.04	Somerset	CWRS	2005
LPSI	None	BVC	Org	Weight-10	w(-1,-1,120,70)	91	GID-092	87.78	86.05	4.57	16.98	1122.49	CDC VR Morris	CWRS	2012
LPSI	None	BVC	Org	Weight-10	w(-1,-1,120,70)	78	GID-079	86.4	89.16	5.33	15.92	1120.43	CDC Imagine	CWRS	2002
LPSI	None	BVC	Org	Weight-10	w(-1,-1,120,70)	137	GID-139	85.25	88.64	5.07	16.18	1116.11	Lillian	CNHR	2003
LPSI	None	BVC	Org	Weight-10	w(-1,-1,120,70)	26	GID-026	85.23	100.07	4.97	16.52	1115.39	AC Cadillac	CWRS	1996
LPSI	None	BVC	Org	Weight-10	w(-1,-1,120,70)	97	GID-099	89.92	91.43	6.17	14.7	1113.26	Conquer	CNHR	2010
LPSI	None	BVC	Org	Weight-10	w(-1,-1,120,70)	65	GID-065	84.69	95.53	5.5	15.62	1111.74	Zealand	CWRS	2016
LPSI	None	BVC	Org	Weight-10	w(-1,-1,120,70)	138	GID-140	86.53	95.28	5	16.33	1111.32	Lovitt	CWRS	2002
LPSI	None	BVC	Org	Weight-10	w(-1,-1,120,70)	7	GID-007	88.69	79.6	5.38	15.49	1109.01	AAC Brandon	CWRS	2013
LPSI	None	BVC	Org	Weight-10	w(-1,-1,120,70)	2	GID-002	88.36	89.58	5.17	15.93	1107.05	5605HR CL	CNHR	2013
LPSI	None	BVC	Org	Weight-10	w(-1,-1,120,70)	62	GID-062	89	82.51	6	14.63	1106.23	AAC Goodwin	CPSR	2017
LPSI	None	BVC	Org	Weight-10	w(-1,-1,120,70)	74	GID-074	85.34	96.91	5.21	15.94	1105.25	CDC Alsask	CWRS	2005
LPSI	None	BVC	Org	Weight-10	w(-1,-1,120,70)	111	GID-113	85.01	88.85	5.11	15.9	1103.89	Goodeve	CWRS	2007
LPSI	None	BVC	Org	Weight-10	w(-1,-1,120,70)	88	GID-089	86.47	93.47	5.24	15.79	1102.1	CDC Thrive	CWRS	2010
LPSI	None	BVC	Org	Weight-10	w(-1,-1,120,70)	187	GID-189	85.88	94.51	4.46	16.88	1101.4	SY479 VB	CWRS	2016
LPSI	None	BVC	Org	Weight-10	w(-1,-1,120,70)	75	GID-076	85.92	99.71	5.04	16.07	1096.16	CDC Bounty	CWRS	2000
LPSI	None	BVC	Org	Weight-10	w(-1,-1,120,70)	157	GID-159	83.18	93	5.01	15.95	1096.04	PT472	CWRS	0
LPSI	None	BVC	Org	Weight-10	w(-1,-1,120,70)	68	GID-068	84.85	89.89	4.47	16.62	1093.43	BYT14-19	CWRS	0
LPSI	None	BVC	Org	Weight-10	w(-1,-1,120,70)	21	GID-021	88.16	73.59	5.57	14.79	1091.88	AAC Viewfield	CWRS	2016
LPSI	None	BVC	Org	Weight-10	w(-1,-1,120,70)	156	GID-158	85.01	84.15	5.02	15.68	1089.87	AAC Tisdale	CWRS	2017
RLPSI (Yield=0)	Yield	BVC	Con	Weight-6	w(-1,-1,150,70)	122	GID-124	93.38	74.63	4.97	16.63	1301.37	AAC Castle	CPSR	2018
RLPSI (Yield=0)	Yield	BVC	Con	Weight-6	w(-1,-1,150,70)	91	GID-092	89.62	78.83	4.4	17.37	1296.55	CDC VR Morris	CWRS	2012
RLPSI (Yield=0)	Yield	BVC	Con	Weight-6	w(-1,-1,150,70)	97	GID-099	91.71	84.45	5.16	16.36	1290.09	Conquer	CNHR	2010
RLPSI (Yield=0)	Yield	BVC	Con	Weight-6	w(-1,-1,150,70)	2	GID-002	89.61	84.79	4.86	16.7	1286.57	5605HR CL	CNHR	2013
RLPSI (Yield=0)	Yield	BVC	Con	Weight-6	w(-1,-1,150,70)	164	GID-166	85.45	80.7	4.51	16.98	1280.35	Jake	CWRS	2018
RLPSI (Yield=0)	Yield	BVC	Con	Weight-6	w(-1,-1,150,70)	64	GID-064	87.66	81.42	4.94	16.33	1274.47	CDC Landmark	CWRS	2016
RLPSI (Yield=0)	Yield	BVC	Con	Weight-6	w(-1,-1,150,70)	159	GID-161	87.28	79.08	5.07	16.11	1274.08	CDC Hughes	CWRS	2016
RLPSI (Yield=0)	Yield	BVC	Con	Weight-6	w(-1,-1,150,70)	187	GID-189	87.83	88.76	4.43	17.09	1271.91	SY479 VB	CWRS	2016
RLPSI (Yield=0)	Yield	BVC	Con	Weight-6	w(-1,-1,150,70)	68	GID-068	88.14	85.38	4.26	17.24	1270.96	BYT14-19	CWRS	0
RLPSI (Yield=0)	Yield	BVC	Con	Weight-6	w(-1,-1,150,70)	54	GID-054	90.4	94.84	4.87	16.6	1270.74	Burnside	CWES	2004
RLPSI (Yield=0)	Yield	BVC	Con	Weight-6	w(-1,-1,150,70)	7	GID-007	91.03	78.13	5.24	15.72	1264.8	AAC Brandon	CWRS	2013
RLPSI (Yield=0)	Yield	BVC	Con	Weight-6	w(-1,-1,150,70)	179	GID-181	86.47	90.53	4.01	17.55	1264.5	Somerset	CWRS	2005
RLPSI (Yield=0)	Yield	BVC	Con	Weight-6	w(-1,-1,150,70)	61	GID-061	86.64	81.14	4.97	16.1	1263.47	AAC Redberry	CWRS	2016
RLPSI (Yield=0)	Yield	BVC	Con	Weight-6	w(-1,-1,150,70)	158	GID-160	89.83	86.16	4.75	16.47	1262.63	PT479	CWRS	0
RLPSI (Yield=0)	Yield	BVC	Con	Weight-6	w(-1,-1,150,70)	62	GID-062	90.48	78.59	5.64	15.15	1261.88	AAC Goodwin	CPSR	2017
RLPSI (Yield=0)	Yield	BVC	Con	Weight-6	w(-1,-1,150,70)	26	GID-026	86.84	89.35	4.48	16.86	1261.57	AC Cadillac	CWRS	1996
RLPSI (Yield=0)	Yield	BVC	Con	Weight-6	w(-1,-1,150,70)	181	GID-183	89.61	79.64	4.9	16.09	1258.61	Stettler	CWRS	2008
RLPSI (Yield=0)	Yield	BVC	Con	Weight-6	w(-1,-1,150,70)	156	GID-158	87.85	79.98	4.62	16.43	1256.64	AAC Tisdale	CWRS	2017
RLPSI (Yield=0)	Yield	BVC	Con	Weight-6	w(-1,-1,150,70)	188	GID-190	88.87	82.12	4.28	16.91	1256.13	SY637	CWRS	2016
RLPSI (Yield=0)	Yield	BVC	Con	Weight-6	w(-1,-1,150,70)	186	GID-188	88.12	72.88	4.81	16.03	1255.14	SY 433	CWRS	2012
RLPSI (Yield=0)	Yield	BVC	Con	Weight-7	w(-5,-1,150,70)	91	GID-092	89.62	78.83	4.4	17.37	1047.13	CDC VR Morris	CWRS	2012
RLPSI (Yield=0)	Yield	BVC	Con	Weight-7	w(-5,-1,150,70)	122	GID-124	93.38	74.63	4.97	16.63	1046.64	AAC Castle	CPSR	2018
RLPSI (Yield=0)	Yield	BVC	Con	Weight-7	w(-5,-1,150,70)	164	GID-166	85.45	80.7	4.51	16.98	1045.23	Jake	CWRS	2018
RLPSI (Yield=0)	Yield	BVC	Con	Weight-7	w(-5,-1,150,70)	97	GID-099	91.71	84.45	5.16	16.36	1041.54	Conquer	CNHR	2010
RLPSI (Yield=0)	Yield	BVC	Con	Weight-7	w(-5,-1,150,70)	2	GID-002	89.61	84.79	4.86	16.7	1041.43	5605HR CL	CNHR	2013
RLPSI (Yield=0)	Yield	BVC	Con	Weight-7	w(-5,-1,150,70)	159	GID-161	87.28	79.08	5.07	16.11	1039.4	CDC Hughes	CWRS	2016
RLPSI (Yield=0)	Yield	BVC	Con	Weight-7	w(-5,-1,150,70)	64	GID-064	87.66	81.42	4.94	16.33	1036.87	CDC Landmark	CWRS	2016
RLPSI (Yield=0)	Yield	BVC	Con	Weight-7	w(-5,-1,150,70)	61	GID-061	86.64	81.14	4.97	16.1	1029.5	AAC Redberry	CWRS	2016
RLPSI (Yield=0)	Yield	BVC	Con	Weight-7	w(-5,-1,150,70)	187	GID-189	87.83	88.76	4.43	17.09	1027.31	SY479 VB	CWRS	2016
RLPSI (Yield=0)	Yield	BVC	Con	Weight-7	w(-5,-1,150,70)	68	GID-068	88.14	85.38	4.26	17.24	1023.94	BYT14-19	CWRS	0
RLPSI (Yield=0)	Yield	BVC	Con	Weight-7	w(-5,-1,150,70)	62	GID-062	90.48	78.59	5.64	15.15	1023.23	AAC Goodwin	CPSR	2017
RLPSI (Yield=0)	Yield	BVC	Con	Weight-7	w(-5,-1,150,70)	54	GID-054	90.4	94.84	4.87	16.6	1021.94	Burnside	CWES	2004
RLPSI (Yield=0)	Yield	BVC	Con	Weight-7	w(-5,-1,150,70)	26	GID-026	86.84	89.35	4.48	16.86	1020.61	AC Cadillac	CWRS	1996
RLPSI (Yield=0)	Yield	BVC	Con	Weight-7	w(-5,-1,150,70)	7	GID-007	91.03	78.13	5.24	15.72	1020.1	AAC Brandon	CWRS	2013
RLPSI (Yield=0)	Yield	BVC	Con	Weight-7	w(-5,-1,150,70)	179	GID-181	86.47	90.53	4.01	17.55	1019.47	Somerset	CWRS	2005
RLPSI (Yield=0)	Yield	BVC	Con	Weight-7	w(-5,-1,150,70)	186	GID-188	88.12	72.88	4.81	16.03	1015.74	SY 433	CWRS	2012
RLPSI (Yield=0)	Yield	BVC	Con	Weight-7	w(-5,-1,150,70)	158	GID-160	89.83	86.16	4.75	16.47	1015.44	PT479	CWRS	0
RLPSI (Yield=0)	Yield	BVC	Con	Weight-7	w(-5,-1,150,70)	156	GID-158	87.85	79.98	4.62	16.43	1015.14	AAC Tisdale	CWRS	2017
RLPSI (Yield=0)	Yield	BVC	Con	Weight-7	w(-5,-1,150,70)	181	GID-183	89.61	79.64	4.9	16.09	1014.57	Stettler	CWRS	2008
RLPSI (Yield=0)	Yield	BVC	Con	Weight-7	w(-5,-1,150,70)	107	GID-109	85.94	91.73	4.72	16.39	1014.24	Glencross	CWES	2008
RLPSI (Yield=0)	Yield	BVC	Con	Weight-8	w(-1,-1,130,70)	122	GID-124	93.38	74.63	4.97	16.63	1301.37	AAC Castle	CPSR	2018
RLPSI (Yield=0)	Yield	BVC	Con	Weight-8	w(-1,-1,130,70)	91	GID-092	89.62	78.83	4.4	17.37	1296.55	CDC VR Morris	CWRS	2012
RLPSI (Yield=0)	Yield	BVC	Con	Weight-8	w(-1,-1,130,70)	97	GID-099	91.71	84.45	5.16	16.36	1290.09	Conquer	CNHR	2010
RLPSI (Yield=0)	Yield	BVC	Con	Weight-8	w(-1,-1,130,70)	2	GID-002	89.61	84.79	4.86	16.7	1286.57	5605HR CL	CNHR	2013
RLPSI (Yield=0)	Yield	BVC	Con	Weight-8	w(-1,-1,130,70)	164	GID-166	85.45	80.7	4.51	16.98	1280.35	Jake	CWRS	2018
RLPSI (Yield=0)	Yield	BVC	Con	Weight-8	w(-1,-1,130,70)	64	GID-064	87.66	81.42	4.94	16.33	1274.47	CDC Landmark	CWRS	2016
RLPSI (Yield=0)	Yield	BVC	Con	Weight-8	w(-1,-1,130,70)	159	GID-161	87.28	79.08	5.07	16.11	1274.08	CDC Hughes	CWRS	2016
RLPSI (Yield=0)	Yield	BVC	Con	Weight-8	w(-1,-1,130,70)	187	GID-189	87.83	88.76	4.43	17.09	1271.91	SY479 VB	CWRS	2016
RLPSI (Yield=0)	Yield	BVC	Con	Weight-8	w(-1,-1,130,70)	68	GID-068	88.14	85.38	4.26	17.24	1270.96	BYT14-19	CWRS	0
RLPSI (Yield=0)	Yield	BVC	Con	Weight-8	w(-1,-1,130,70)	54	GID-054	90.4	94.84	4.87	16.6	1270.74	Burnside	CWES	2004
RLPSI (Yield=0)	Yield	BVC	Con	Weight-8	w(-1,-1,130,70)	7	GID-007	91.03	78.13	5.24	15.72	1264.8	AAC Brandon	CWRS	2013
RLPSI (Yield=0)	Yield	BVC	Con	Weight-8	w(-1,-1,130,70)	179	GID-181	86.47	90.53	4.01	17.55	1264.5	Somerset	CWRS	2005
RLPSI (Yield=0)	Yield	BVC	Con	Weight-8	w(-1,-1,130,70)	61	GID-061	86.64	81.14	4.97	16.1	1263.47	AAC Redberry	CWRS	2016
RLPSI (Yield=0)	Yield	BVC	Con	Weight-8	w(-1,-1,130,70)	158	GID-160	89.83	86.16	4.75	16.47	1262.63	PT479	CWRS	0
RLPSI (Yield=0)	Yield	BVC	Con	Weight-8	w(-1,-1,130,70)	62	GID-062	90.48	78.59	5.64	15.15	1261.88	AAC Goodwin	CPSR	2017
RLPSI (Yield=0)	Yield	BVC	Con	Weight-8	w(-1,-1,130,70)	26	GID-026	86.84	89.35	4.48	16.86	1261.57	AC Cadillac	CWRS	1996
RLPSI (Yield=0)	Yield	BVC	Con	Weight-8	w(-1,-1,130,70)	181	GID-183	89.61	79.64	4.9	16.09	1258.61	Stettler	CWRS	2008
RLPSI (Yield=0)	Yield	BVC	Con	Weight-8	w(-1,-1,130,70)	156	GID-158	87.85	79.98	4.62	16.43	1256.64	AAC Tisdale	CWRS	2017
RLPSI (Yield=0)	Yield	BVC	Con	Weight-8	w(-1,-1,130,70)	188	GID-190	88.87	82.12	4.28	16.91	1256.13	SY637	CWRS	2016
RLPSI (Yield=0)	Yield	BVC	Con	Weight-8	w(-1,-1,130,70)	186	GID-188	88.12	72.88	4.81	16.03	1255.14	SY 433	CWRS	2012
RLPSI (Yield=0)	Yield	BVC	Con	Weight-9	w(-5,-1,130,70)	91	GID-092	89.62	78.83	4.4	17.37	1047.13	CDC VR Morris	CWRS	2012
RLPSI (Yield=0)	Yield	BVC	Con	Weight-9	w(-5,-1,130,70)	122	GID-124	93.38	74.63	4.97	16.63	1046.64	AAC Castle	CPSR	2018
RLPSI (Yield=0)	Yield	BVC	Con	Weight-9	w(-5,-1,130,70)	164	GID-166	85.45	80.7	4.51	16.98	1045.23	Jake	CWRS	2018
RLPSI (Yield=0)	Yield	BVC	Con	Weight-9	w(-5,-1,130,70)	97	GID-099	91.71	84.45	5.16	16.36	1041.54	Conquer	CNHR	2010
RLPSI (Yield=0)	Yield	BVC	Con	Weight-9	w(-5,-1,130,70)	2	GID-002	89.61	84.79	4.86	16.7	1041.43	5605HR CL	CNHR	2013
RLPSI (Yield=0)	Yield	BVC	Con	Weight-9	w(-5,-1,130,70)	159	GID-161	87.28	79.08	5.07	16.11	1039.4	CDC Hughes	CWRS	2016
RLPSI (Yield=0)	Yield	BVC	Con	Weight-9	w(-5,-1,130,70)	64	GID-064	87.66	81.42	4.94	16.33	1036.87	CDC Landmark	CWRS	2016
RLPSI (Yield=0)	Yield	BVC	Con	Weight-9	w(-5,-1,130,70)	61	GID-061	86.64	81.14	4.97	16.1	1029.5	AAC Redberry	CWRS	2016
RLPSI (Yield=0)	Yield	BVC	Con	Weight-9	w(-5,-1,130,70)	187	GID-189	87.83	88.76	4.43	17.09	1027.31	SY479 VB	CWRS	2016
RLPSI (Yield=0)	Yield	BVC	Con	Weight-9	w(-5,-1,130,70)	68	GID-068	88.14	85.38	4.26	17.24	1023.94	BYT14-19	CWRS	0
RLPSI (Yield=0)	Yield	BVC	Con	Weight-9	w(-5,-1,130,70)	62	GID-062	90.48	78.59	5.64	15.15	1023.23	AAC Goodwin	CPSR	2017
RLPSI (Yield=0)	Yield	BVC	Con	Weight-9	w(-5,-1,130,70)	54	GID-054	90.4	94.84	4.87	16.6	1021.94	Burnside	CWES	2004
RLPSI (Yield=0)	Yield	BVC	Con	Weight-9	w(-5,-1,130,70)	26	GID-026	86.84	89.35	4.48	16.86	1020.61	AC Cadillac	CWRS	1996
RLPSI (Yield=0)	Yield	BVC	Con	Weight-9	w(-5,-1,130,70)	7	GID-007	91.03	78.13	5.24	15.72	1020.1	AAC Brandon	CWRS	2013
RLPSI (Yield=0)	Yield	BVC	Con	Weight-9	w(-5,-1,130,70)	179	GID-181	86.47	90.53	4.01	17.55	1019.47	Somerset	CWRS	2005
RLPSI (Yield=0)	Yield	BVC	Con	Weight-9	w(-5,-1,130,70)	186	GID-188	88.12	72.88	4.81	16.03	1015.74	SY 433	CWRS	2012
RLPSI (Yield=0)	Yield	BVC	Con	Weight-9	w(-5,-1,130,70)	158	GID-160	89.83	86.16	4.75	16.47	1015.44	PT479	CWRS	0
RLPSI (Yield=0)	Yield	BVC	Con	Weight-9	w(-5,-1,130,70)	156	GID-158	87.85	79.98	4.62	16.43	1015.14	AAC Tisdale	CWRS	2017
RLPSI (Yield=0)	Yield	BVC	Con	Weight-9	w(-5,-1,130,70)	181	GID-183	89.61	79.64	4.9	16.09	1014.57	Stettler	CWRS	2008
RLPSI (Yield=0)	Yield	BVC	Con	Weight-9	w(-5,-1,130,70)	107	GID-109	85.94	91.73	4.72	16.39	1014.24	Glencross	CWES	2008
RLPSI (Yield=0)	Yield	BVC	Con	Weight-10	w(-1,-1,120,70)	122	GID-124	93.38	74.63	4.97	16.63	1301.37	AAC Castle	CPSR	2018
RLPSI (Yield=0)	Yield	BVC	Con	Weight-10	w(-1,-1,120,70)	91	GID-092	89.62	78.83	4.4	17.37	1296.55	CDC VR Morris	CWRS	2012
RLPSI (Yield=0)	Yield	BVC	Con	Weight-10	w(-1,-1,120,70)	97	GID-099	91.71	84.45	5.16	16.36	1290.09	Conquer	CNHR	2010
RLPSI (Yield=0)	Yield	BVC	Con	Weight-10	w(-1,-1,120,70)	2	GID-002	89.61	84.79	4.86	16.7	1286.57	5605HR CL	CNHR	2013
RLPSI (Yield=0)	Yield	BVC	Con	Weight-10	w(-1,-1,120,70)	164	GID-166	85.45	80.7	4.51	16.98	1280.35	Jake	CWRS	2018
RLPSI (Yield=0)	Yield	BVC	Con	Weight-10	w(-1,-1,120,70)	64	GID-064	87.66	81.42	4.94	16.33	1274.47	CDC Landmark	CWRS	2016
RLPSI (Yield=0)	Yield	BVC	Con	Weight-10	w(-1,-1,120,70)	159	GID-161	87.28	79.08	5.07	16.11	1274.08	CDC Hughes	CWRS	2016
RLPSI (Yield=0)	Yield	BVC	Con	Weight-10	w(-1,-1,120,70)	187	GID-189	87.83	88.76	4.43	17.09	1271.91	SY479 VB	CWRS	2016
RLPSI (Yield=0)	Yield	BVC	Con	Weight-10	w(-1,-1,120,70)	68	GID-068	88.14	85.38	4.26	17.24	1270.96	BYT14-19	CWRS	0
RLPSI (Yield=0)	Yield	BVC	Con	Weight-10	w(-1,-1,120,70)	54	GID-054	90.4	94.84	4.87	16.6	1270.74	Burnside	CWES	2004
RLPSI (Yield=0)	Yield	BVC	Con	Weight-10	w(-1,-1,120,70)	7	GID-007	91.03	78.13	5.24	15.72	1264.8	AAC Brandon	CWRS	2013
RLPSI (Yield=0)	Yield	BVC	Con	Weight-10	w(-1,-1,120,70)	179	GID-181	86.47	90.53	4.01	17.55	1264.5	Somerset	CWRS	2005
RLPSI (Yield=0)	Yield	BVC	Con	Weight-10	w(-1,-1,120,70)	61	GID-061	86.64	81.14	4.97	16.1	1263.47	AAC Redberry	CWRS	2016
RLPSI (Yield=0)	Yield	BVC	Con	Weight-10	w(-1,-1,120,70)	158	GID-160	89.83	86.16	4.75	16.47	1262.63	PT479	CWRS	0
RLPSI (Yield=0)	Yield	BVC	Con	Weight-10	w(-1,-1,120,70)	62	GID-062	90.48	78.59	5.64	15.15	1261.88	AAC Goodwin	CPSR	2017
RLPSI (Yield=0)	Yield	BVC	Con	Weight-10	w(-1,-1,120,70)	26	GID-026	86.84	89.35	4.48	16.86	1261.57	AC Cadillac	CWRS	1996
RLPSI (Yield=0)	Yield	BVC	Con	Weight-10	w(-1,-1,120,70)	181	GID-183	89.61	79.64	4.9	16.09	1258.61	Stettler	CWRS	2008
RLPSI (Yield=0)	Yield	BVC	Con	Weight-10	w(-1,-1,120,70)	156	GID-158	87.85	79.98	4.62	16.43	1256.64	AAC Tisdale	CWRS	2017
RLPSI (Yield=0)	Yield	BVC	Con	Weight-10	w(-1,-1,120,70)	188	GID-190	88.87	82.12	4.28	16.91	1256.13	SY637	CWRS	2016
RLPSI (Yield=0)	Yield	BVC	Con	Weight-10	w(-1,-1,120,70)	186	GID-188	88.12	72.88	4.81	16.03	1255.14	SY 433	CWRS	2012
RLPSI (Yield=0)	Yield	BVC	Org	Weight-6	w(-1,-1,150,70)	179	GID-181	86.06	98.66	4.48	17.68	1153.35	Somerset	CWRS	2005
RLPSI (Yield=0)	Yield	BVC	Org	Weight-6	w(-1,-1,150,70)	91	GID-092	87.78	86.05	4.57	16.98	1134.55	CDC VR Morris	CWRS	2012
RLPSI (Yield=0)	Yield	BVC	Org	Weight-6	w(-1,-1,150,70)	78	GID-079	86.4	89.16	5.33	15.92	1134.08	CDC Imagine	CWRS	2002
RLPSI (Yield=0)	Yield	BVC	Org	Weight-6	w(-1,-1,150,70)	137	GID-139	85.25	88.64	5.07	16.18	1129.1	Lillian	CNHR	2003
RLPSI (Yield=0)	Yield	BVC	Org	Weight-6	w(-1,-1,150,70)	97	GID-099	89.92	91.43	6.17	14.7	1129.07	Conquer	CNHR	2010
RLPSI (Yield=0)	Yield	BVC	Org	Weight-6	w(-1,-1,150,70)	26	GID-026	85.23	100.07	4.97	16.52	1127.78	AC Cadillac	CWRS	1996
RLPSI (Yield=0)	Yield	BVC	Org	Weight-6	w(-1,-1,150,70)	65	GID-065	84.69	95.53	5.5	15.62	1125.49	Zealand	CWRS	2016
RLPSI (Yield=0)	Yield	BVC	Org	Weight-6	w(-1,-1,150,70)	138	GID-140	86.53	95.28	5	16.33	1124.04	Lovitt	CWRS	2002
RLPSI (Yield=0)	Yield	BVC	Org	Weight-6	w(-1,-1,150,70)	7	GID-007	88.69	79.6	5.38	15.49	1123.26	AAC Brandon	CWRS	2013
RLPSI (Yield=0)	Yield	BVC	Org	Weight-6	w(-1,-1,150,70)	62	GID-062	89	82.51	6	14.63	1121.87	AAC Goodwin	CPSR	2017
RLPSI (Yield=0)	Yield	BVC	Org	Weight-6	w(-1,-1,150,70)	2	GID-002	88.36	89.58	5.17	15.93	1120.48	5605HR CL	CNHR	2013
RLPSI (Yield=0)	Yield	BVC	Org	Weight-6	w(-1,-1,150,70)	74	GID-074	85.34	96.91	5.21	15.94	1118.33	CDC Alsask	CWRS	2005
RLPSI (Yield=0)	Yield	BVC	Org	Weight-6	w(-1,-1,150,70)	111	GID-113	85.01	88.85	5.11	15.9	1116.97	Goodeve	CWRS	2007
RLPSI (Yield=0)	Yield	BVC	Org	Weight-6	w(-1,-1,150,70)	88	GID-089	86.47	93.47	5.24	15.79	1115.45	CDC Thrive	CWRS	2010
RLPSI (Yield=0)	Yield	BVC	Org	Weight-6	w(-1,-1,150,70)	187	GID-189	85.88	94.51	4.46	16.88	1112.85	SY479 VB	CWRS	2016
RLPSI (Yield=0)	Yield	BVC	Org	Weight-6	w(-1,-1,150,70)	75	GID-076	85.92	99.71	5.04	16.07	1108.81	CDC Bounty	CWRS	2000
RLPSI (Yield=0)	Yield	BVC	Org	Weight-6	w(-1,-1,150,70)	157	GID-159	83.18	93	5.01	15.95	1108.64	PT472	CWRS	0
RLPSI (Yield=0)	Yield	BVC	Org	Weight-6	w(-1,-1,150,70)	21	GID-021	88.16	73.59	5.57	14.79	1106.76	AAC Viewfield	CWRS	2016
RLPSI (Yield=0)	Yield	BVC	Org	Weight-6	w(-1,-1,150,70)	68	GID-068	84.85	89.89	4.47	16.62	1104.99	BYT14-19	CWRS	0
RLPSI (Yield=0)	Yield	BVC	Org	Weight-6	w(-1,-1,150,70)	156	GID-158	85.01	84.15	5.02	15.68	1102.91	AAC Tisdale	CWRS	2017
RLPSI (Yield=0)	Yield	BVC	Org	Weight-7	w(-5,-1,150,70)	179	GID-181	86.06	98.66	4.48	17.68	932.945	Somerset	CWRS	2005
RLPSI (Yield=0)	Yield	BVC	Org	Weight-7	w(-5,-1,150,70)	78	GID-079	86.4	89.16	5.33	15.92	921.414	CDC Imagine	CWRS	2002
RLPSI (Yield=0)	Yield	BVC	Org	Weight-7	w(-5,-1,150,70)	65	GID-065	84.69	95.53	5.5	15.62	918.769	Zealand	CWRS	2016
RLPSI (Yield=0)	Yield	BVC	Org	Weight-7	w(-5,-1,150,70)	137	GID-139	85.25	88.64	5.07	16.18	917.495	Lillian	CNHR	2003
RLPSI (Yield=0)	Yield	BVC	Org	Weight-7	w(-5,-1,150,70)	26	GID-026	85.23	100.07	4.97	16.52	914.106	AC Cadillac	CWRS	1996
RLPSI (Yield=0)	Yield	BVC	Org	Weight-7	w(-5,-1,150,70)	97	GID-099	89.92	91.43	6.17	14.7	913.4	Conquer	CNHR	2010
RLPSI (Yield=0)	Yield	BVC	Org	Weight-7	w(-5,-1,150,70)	91	GID-092	87.78	86.05	4.57	16.98	911.11	CDC VR Morris	CWRS	2012
RLPSI (Yield=0)	Yield	BVC	Org	Weight-7	w(-5,-1,150,70)	62	GID-062	89	82.51	6	14.63	908.282	AAC Goodwin	CPSR	2017
RLPSI (Yield=0)	Yield	BVC	Org	Weight-7	w(-5,-1,150,70)	138	GID-140	86.53	95.28	5	16.33	907.257	Lovitt	CWRS	2002
RLPSI (Yield=0)	Yield	BVC	Org	Weight-7	w(-5,-1,150,70)	74	GID-074	85.34	96.91	5.21	15.94	906.828	CDC Alsask	CWRS	2005
RLPSI (Yield=0)	Yield	BVC	Org	Weight-7	w(-5,-1,150,70)	111	GID-113	85.01	88.85	5.11	15.9	906.373	Goodeve	CWRS	2007
RLPSI (Yield=0)	Yield	BVC	Org	Weight-7	w(-5,-1,150,70)	7	GID-007	88.69	79.6	5.38	15.49	905.204	AAC Brandon	CWRS	2013
RLPSI (Yield=0)	Yield	BVC	Org	Weight-7	w(-5,-1,150,70)	157	GID-159	83.18	93	5.01	15.95	902.1	PT472	CWRS	0
RLPSI (Yield=0)	Yield	BVC	Org	Weight-7	w(-5,-1,150,70)	88	GID-089	86.47	93.47	5.24	15.79	901.208	CDC Thrive	CWRS	2010
RLPSI (Yield=0)	Yield	BVC	Org	Weight-7	w(-5,-1,150,70)	2	GID-002	88.36	89.58	5.17	15.93	900.4	5605HR CL	CNHR	2013
RLPSI (Yield=0)	Yield	BVC	Org	Weight-7	w(-5,-1,150,70)	75	GID-076	85.92	99.71	5.04	16.07	893.678	CDC Bounty	CWRS	2000
RLPSI (Yield=0)	Yield	BVC	Org	Weight-7	w(-5,-1,150,70)	187	GID-189	85.88	94.51	4.46	16.88	893.062	SY479 VB	CWRS	2016
RLPSI (Yield=0)	Yield	BVC	Org	Weight-7	w(-5,-1,150,70)	21	GID-021	88.16	73.59	5.57	14.79	892.595	AAC Viewfield	CWRS	2016
RLPSI (Yield=0)	Yield	BVC	Org	Weight-7	w(-5,-1,150,70)	156	GID-158	85.01	84.15	5.02	15.68	891.926	AAC Tisdale	CWRS	2017
RLPSI (Yield=0)	Yield	BVC	Org	Weight-7	w(-5,-1,150,70)	68	GID-068	84.85	89.89	4.47	16.62	888.814	BYT14-19	CWRS	0
RLPSI (Yield=0)	Yield	BVC	Org	Weight-8	w(-1,-1,130,70)	179	GID-181	86.06	98.66	4.48	17.68	1153.35	Somerset	CWRS	2005
RLPSI (Yield=0)	Yield	BVC	Org	Weight-8	w(-1,-1,130,70)	91	GID-092	87.78	86.05	4.57	16.98	1134.55	CDC VR Morris	CWRS	2012
RLPSI (Yield=0)	Yield	BVC	Org	Weight-8	w(-1,-1,130,70)	78	GID-079	86.4	89.16	5.33	15.92	1134.08	CDC Imagine	CWRS	2002
RLPSI (Yield=0)	Yield	BVC	Org	Weight-8	w(-1,-1,130,70)	137	GID-139	85.25	88.64	5.07	16.18	1129.1	Lillian	CNHR	2003
RLPSI (Yield=0)	Yield	BVC	Org	Weight-8	w(-1,-1,130,70)	97	GID-099	89.92	91.43	6.17	14.7	1129.07	Conquer	CNHR	2010
RLPSI (Yield=0)	Yield	BVC	Org	Weight-8	w(-1,-1,130,70)	26	GID-026	85.23	100.07	4.97	16.52	1127.78	AC Cadillac	CWRS	1996
RLPSI (Yield=0)	Yield	BVC	Org	Weight-8	w(-1,-1,130,70)	65	GID-065	84.69	95.53	5.5	15.62	1125.49	Zealand	CWRS	2016
RLPSI (Yield=0)	Yield	BVC	Org	Weight-8	w(-1,-1,130,70)	138	GID-140	86.53	95.28	5	16.33	1124.04	Lovitt	CWRS	2002
RLPSI (Yield=0)	Yield	BVC	Org	Weight-8	w(-1,-1,130,70)	7	GID-007	88.69	79.6	5.38	15.49	1123.26	AAC Brandon	CWRS	2013
RLPSI (Yield=0)	Yield	BVC	Org	Weight-8	w(-1,-1,130,70)	62	GID-062	89	82.51	6	14.63	1121.87	AAC Goodwin	CPSR	2017
RLPSI (Yield=0)	Yield	BVC	Org	Weight-8	w(-1,-1,130,70)	2	GID-002	88.36	89.58	5.17	15.93	1120.48	5605HR CL	CNHR	2013
RLPSI (Yield=0)	Yield	BVC	Org	Weight-8	w(-1,-1,130,70)	74	GID-074	85.34	96.91	5.21	15.94	1118.33	CDC Alsask	CWRS	2005
RLPSI (Yield=0)	Yield	BVC	Org	Weight-8	w(-1,-1,130,70)	111	GID-113	85.01	88.85	5.11	15.9	1116.97	Goodeve	CWRS	2007
RLPSI (Yield=0)	Yield	BVC	Org	Weight-8	w(-1,-1,130,70)	88	GID-089	86.47	93.47	5.24	15.79	1115.45	CDC Thrive	CWRS	2010
RLPSI (Yield=0)	Yield	BVC	Org	Weight-8	w(-1,-1,130,70)	187	GID-189	85.88	94.51	4.46	16.88	1112.85	SY479 VB	CWRS	2016
RLPSI (Yield=0)	Yield	BVC	Org	Weight-8	w(-1,-1,130,70)	75	GID-076	85.92	99.71	5.04	16.07	1108.81	CDC Bounty	CWRS	2000
RLPSI (Yield=0)	Yield	BVC	Org	Weight-8	w(-1,-1,130,70)	157	GID-159	83.18	93	5.01	15.95	1108.64	PT472	CWRS	0
RLPSI (Yield=0)	Yield	BVC	Org	Weight-8	w(-1,-1,130,70)	21	GID-021	88.16	73.59	5.57	14.79	1106.76	AAC Viewfield	CWRS	2016
RLPSI (Yield=0)	Yield	BVC	Org	Weight-8	w(-1,-1,130,70)	68	GID-068	84.85	89.89	4.47	16.62	1104.99	BYT14-19	CWRS	0
RLPSI (Yield=0)	Yield	BVC	Org	Weight-8	w(-1,-1,130,70)	156	GID-158	85.01	84.15	5.02	15.68	1102.91	AAC Tisdale	CWRS	2017
RLPSI (Yield=0)	Yield	BVC	Org	Weight-9	w(-5,-1,130,70)	179	GID-181	86.06	98.66	4.48	17.68	932.945	Somerset	CWRS	2005
RLPSI (Yield=0)	Yield	BVC	Org	Weight-9	w(-5,-1,130,70)	78	GID-079	86.4	89.16	5.33	15.92	921.414	CDC Imagine	CWRS	2002
RLPSI (Yield=0)	Yield	BVC	Org	Weight-9	w(-5,-1,130,70)	65	GID-065	84.69	95.53	5.5	15.62	918.769	Zealand	CWRS	2016
RLPSI (Yield=0)	Yield	BVC	Org	Weight-9	w(-5,-1,130,70)	137	GID-139	85.25	88.64	5.07	16.18	917.495	Lillian	CNHR	2003
RLPSI (Yield=0)	Yield	BVC	Org	Weight-9	w(-5,-1,130,70)	26	GID-026	85.23	100.07	4.97	16.52	914.106	AC Cadillac	CWRS	1996
RLPSI (Yield=0)	Yield	BVC	Org	Weight-9	w(-5,-1,130,70)	97	GID-099	89.92	91.43	6.17	14.7	913.4	Conquer	CNHR	2010
RLPSI (Yield=0)	Yield	BVC	Org	Weight-9	w(-5,-1,130,70)	91	GID-092	87.78	86.05	4.57	16.98	911.11	CDC VR Morris	CWRS	2012
RLPSI (Yield=0)	Yield	BVC	Org	Weight-9	w(-5,-1,130,70)	62	GID-062	89	82.51	6	14.63	908.282	AAC Goodwin	CPSR	2017
RLPSI (Yield=0)	Yield	BVC	Org	Weight-9	w(-5,-1,130,70)	138	GID-140	86.53	95.28	5	16.33	907.257	Lovitt	CWRS	2002
RLPSI (Yield=0)	Yield	BVC	Org	Weight-9	w(-5,-1,130,70)	74	GID-074	85.34	96.91	5.21	15.94	906.828	CDC Alsask	CWRS	2005
RLPSI (Yield=0)	Yield	BVC	Org	Weight-9	w(-5,-1,130,70)	111	GID-113	85.01	88.85	5.11	15.9	906.373	Goodeve	CWRS	2007
RLPSI (Yield=0)	Yield	BVC	Org	Weight-9	w(-5,-1,130,70)	7	GID-007	88.69	79.6	5.38	15.49	905.204	AAC Brandon	CWRS	2013
RLPSI (Yield=0)	Yield	BVC	Org	Weight-9	w(-5,-1,130,70)	157	GID-159	83.18	93	5.01	15.95	902.1	PT472	CWRS	0
RLPSI (Yield=0)	Yield	BVC	Org	Weight-9	w(-5,-1,130,70)	88	GID-089	86.47	93.47	5.24	15.79	901.208	CDC Thrive	CWRS	2010
RLPSI (Yield=0)	Yield	BVC	Org	Weight-9	w(-5,-1,130,70)	2	GID-002	88.36	89.58	5.17	15.93	900.4	5605HR CL	CNHR	2013
RLPSI (Yield=0)	Yield	BVC	Org	Weight-9	w(-5,-1,130,70)	75	GID-076	85.92	99.71	5.04	16.07	893.678	CDC Bounty	CWRS	2000
RLPSI (Yield=0)	Yield	BVC	Org	Weight-9	w(-5,-1,130,70)	187	GID-189	85.88	94.51	4.46	16.88	893.062	SY479 VB	CWRS	2016
RLPSI (Yield=0)	Yield	BVC	Org	Weight-9	w(-5,-1,130,70)	21	GID-021	88.16	73.59	5.57	14.79	892.595	AAC Viewfield	CWRS	2016
RLPSI (Yield=0)	Yield	BVC	Org	Weight-9	w(-5,-1,130,70)	156	GID-158	85.01	84.15	5.02	15.68	891.926	AAC Tisdale	CWRS	2017
RLPSI (Yield=0)	Yield	BVC	Org	Weight-9	w(-5,-1,130,70)	68	GID-068	84.85	89.89	4.47	16.62	888.814	BYT14-19	CWRS	0
RLPSI (Yield=0)	Yield	BVC	Org	Weight-10	w(-1,-1,120,70)	179	GID-181	86.06	98.66	4.48	17.68	1153.35	Somerset	CWRS	2005
RLPSI (Yield=0)	Yield	BVC	Org	Weight-10	w(-1,-1,120,70)	91	GID-092	87.78	86.05	4.57	16.98	1134.55	CDC VR Morris	CWRS	2012
RLPSI (Yield=0)	Yield	BVC	Org	Weight-10	w(-1,-1,120,70)	78	GID-079	86.4	89.16	5.33	15.92	1134.08	CDC Imagine	CWRS	2002
RLPSI (Yield=0)	Yield	BVC	Org	Weight-10	w(-1,-1,120,70)	137	GID-139	85.25	88.64	5.07	16.18	1129.1	Lillian	CNHR	2003
RLPSI (Yield=0)	Yield	BVC	Org	Weight-10	w(-1,-1,120,70)	97	GID-099	89.92	91.43	6.17	14.7	1129.07	Conquer	CNHR	2010
RLPSI (Yield=0)	Yield	BVC	Org	Weight-10	w(-1,-1,120,70)	26	GID-026	85.23	100.07	4.97	16.52	1127.78	AC Cadillac	CWRS	1996
RLPSI (Yield=0)	Yield	BVC	Org	Weight-10	w(-1,-1,120,70)	65	GID-065	84.69	95.53	5.5	15.62	1125.49	Zealand	CWRS	2016
RLPSI (Yield=0)	Yield	BVC	Org	Weight-10	w(-1,-1,120,70)	138	GID-140	86.53	95.28	5	16.33	1124.04	Lovitt	CWRS	2002
RLPSI (Yield=0)	Yield	BVC	Org	Weight-10	w(-1,-1,120,70)	7	GID-007	88.69	79.6	5.38	15.49	1123.26	AAC Brandon	CWRS	2013
RLPSI (Yield=0)	Yield	BVC	Org	Weight-10	w(-1,-1,120,70)	62	GID-062	89	82.51	6	14.63	1121.87	AAC Goodwin	CPSR	2017
RLPSI (Yield=0)	Yield	BVC	Org	Weight-10	w(-1,-1,120,70)	2	GID-002	88.36	89.58	5.17	15.93	1120.48	5605HR CL	CNHR	2013
RLPSI (Yield=0)	Yield	BVC	Org	Weight-10	w(-1,-1,120,70)	74	GID-074	85.34	96.91	5.21	15.94	1118.33	CDC Alsask	CWRS	2005
RLPSI (Yield=0)	Yield	BVC	Org	Weight-10	w(-1,-1,120,70)	111	GID-113	85.01	88.85	5.11	15.9	1116.97	Goodeve	CWRS	2007
RLPSI (Yield=0)	Yield	BVC	Org	Weight-10	w(-1,-1,120,70)	88	GID-089	86.47	93.47	5.24	15.79	1115.45	CDC Thrive	CWRS	2010
RLPSI (Yield=0)	Yield	BVC	Org	Weight-10	w(-1,-1,120,70)	187	GID-189	85.88	94.51	4.46	16.88	1112.85	SY479 VB	CWRS	2016
RLPSI (Yield=0)	Yield	BVC	Org	Weight-10	w(-1,-1,120,70)	75	GID-076	85.92	99.71	5.04	16.07	1108.81	CDC Bounty	CWRS	2000
RLPSI (Yield=0)	Yield	BVC	Org	Weight-10	w(-1,-1,120,70)	157	GID-159	83.18	93	5.01	15.95	1108.64	PT472	CWRS	0
RLPSI (Yield=0)	Yield	BVC	Org	Weight-10	w(-1,-1,120,70)	21	GID-021	88.16	73.59	5.57	14.79	1106.76	AAC Viewfield	CWRS	2016
RLPSI (Yield=0)	Yield	BVC	Org	Weight-10	w(-1,-1,120,70)	68	GID-068	84.85	89.89	4.47	16.62	1104.99	BYT14-19	CWRS	0
RLPSI (Yield=0)	Yield	BVC	Org	Weight-10	w(-1,-1,120,70)	156	GID-158	85.01	84.15	5.02	15.68	1102.91	AAC Tisdale	CWRS	2017
RLPSI (GPC=0)	GPC	BVC	Con	Weight-6	w(-1,-1,150,70)	62	GID-062	90.48	78.59	5.64	15.15	1092.57	AAC Goodwin	CPSR	2017
RLPSI (GPC=0)	GPC	BVC	Con	Weight-6	w(-1,-1,150,70)	122	GID-124	93.38	74.63	4.97	16.63	1081.09	AAC Castle	CPSR	2018
RLPSI (GPC=0)	GPC	BVC	Con	Weight-6	w(-1,-1,150,70)	151	GID-153	97.34	77.16	5.86	13.54	1075.82	Pasteur	CWSP	2011
RLPSI (GPC=0)	GPC	BVC	Con	Weight-6	w(-1,-1,150,70)	113	GID-115	92.99	82.06	5.85	13.97	1074.54	CDC Throttle	CWSP	2016
RLPSI (GPC=0)	GPC	BVC	Con	Weight-6	w(-1,-1,150,70)	97	GID-099	91.71	84.45	5.16	16.36	1074.29	Conquer	CNHR	2010
RLPSI (GPC=0)	GPC	BVC	Con	Weight-6	w(-1,-1,150,70)	7	GID-007	91.03	78.13	5.24	15.72	1070.8	AAC Brandon	CWRS	2013
RLPSI (GPC=0)	GPC	BVC	Con	Weight-6	w(-1,-1,150,70)	16	GID-016	91.39	72.43	5.2	15.33	1063.44	AAC Penhold	CPSR	2014
RLPSI (GPC=0)	GPC	BVC	Con	Weight-6	w(-1,-1,150,70)	120	GID-122	92.37	72.54	5.22	15.16	1061.31	SY Rowyn	CPSR	2016
RLPSI (GPC=0)	GPC	BVC	Con	Weight-6	w(-1,-1,150,70)	184	GID-186	95.3	82.67	6.56	11.15	1059.77	SWS52	CWSWS	1905
RLPSI (GPC=0)	GPC	BVC	Con	Weight-6	w(-1,-1,150,70)	159	GID-161	87.28	79.08	5.07	16.11	1058.59	CDC Hughes	CWRS	2016
RLPSI (GPC=0)	GPC	BVC	Con	Weight-6	w(-1,-1,150,70)	94	GID-096	94.03	85.01	5.25	15.44	1056.44	CDN Bison	CWES	2009
RLPSI (GPC=0)	GPC	BVC	Con	Weight-6	w(-1,-1,150,70)	67	GID-067	94.04	71.95	5.28	14.63	1053.81	BW5020	CWRS	0
RLPSI (GPC=0)	GPC	BVC	Con	Weight-6	w(-1,-1,150,70)	114	GID-116	94.58	83.76	6.12	12.38	1050.89	AAC Awesome	CWSP	2016
RLPSI (GPC=0)	GPC	BVC	Con	Weight-6	w(-1,-1,150,70)	2	GID-002	89.61	84.79	4.86	16.7	1050.3	5605HR CL	CNHR	2013
RLPSI (GPC=0)	GPC	BVC	Con	Weight-6	w(-1,-1,150,70)	64	GID-064	87.66	81.42	4.94	16.33	1049.04	CDC Landmark	CWRS	2016
RLPSI (GPC=0)	GPC	BVC	Con	Weight-6	w(-1,-1,150,70)	4	GID-004	92.62	77.38	4.95	15.81	1046.95	5701PR	CPSR	2002
RLPSI (GPC=0)	GPC	BVC	Con	Weight-6	w(-1,-1,150,70)	21	GID-021	90.06	74.07	5.05	15.44	1046.78	AAC Viewfield	CWRS	2016
RLPSI (GPC=0)	GPC	BVC	Con	Weight-6	w(-1,-1,150,70)	102	GID-104	90.58	80.8	5.49	14.23	1043.73	Faller	CNHR	2018
RLPSI (GPC=0)	GPC	BVC	Con	Weight-6	w(-1,-1,150,70)	61	GID-061	86.64	81.14	4.97	16.1	1043.63	AAC Redberry	CWRS	2016
RLPSI (GPC=0)	GPC	BVC	Con	Weight-6	w(-1,-1,150,70)	181	GID-183	89.61	79.64	4.9	16.09	1042.77	Stettler	CWRS	2008
RLPSI (GPC=0)	GPC	BVC	Con	Weight-7	w(-5,-1,150,70)	62	GID-062	90.48	78.59	5.64	15.15	693.983	AAC Goodwin	CPSR	2017
RLPSI (GPC=0)	GPC	BVC	Con	Weight-7	w(-5,-1,150,70)	113	GID-115	92.99	82.06	5.85	13.97	672.683	CDC Throttle	CWSP	2016
RLPSI (GPC=0)	GPC	BVC	Con	Weight-7	w(-5,-1,150,70)	7	GID-007	91.03	78.13	5.24	15.72	668.072	AAC Brandon	CWRS	2013
RLPSI (GPC=0)	GPC	BVC	Con	Weight-7	w(-5,-1,150,70)	159	GID-161	87.28	79.08	5.07	16.11	667.026	CDC Hughes	CWRS	2016
RLPSI (GPC=0)	GPC	BVC	Con	Weight-7	w(-5,-1,150,70)	122	GID-124	93.38	74.63	4.97	16.63	666.339	AAC Castle	CPSR	2018
RLPSI (GPC=0)	GPC	BVC	Con	Weight-7	w(-5,-1,150,70)	97	GID-099	91.71	84.45	5.16	16.36	665.822	Conquer	CNHR	2010
RLPSI (GPC=0)	GPC	BVC	Con	Weight-7	w(-5,-1,150,70)	184	GID-186	95.3	82.67	6.56	11.15	662.91	SWS52	CWSWS	1905
RLPSI (GPC=0)	GPC	BVC	Con	Weight-7	w(-5,-1,150,70)	16	GID-016	91.39	72.43	5.2	15.33	661.783	AAC Penhold	CPSR	2014
RLPSI (GPC=0)	GPC	BVC	Con	Weight-7	w(-5,-1,150,70)	151	GID-153	97.34	77.16	5.86	13.54	661.374	Pasteur	CWSP	2011
RLPSI (GPC=0)	GPC	BVC	Con	Weight-7	w(-5,-1,150,70)	120	GID-122	92.37	72.54	5.22	15.16	657.085	SY Rowyn	CPSR	2016
RLPSI (GPC=0)	GPC	BVC	Con	Weight-7	w(-5,-1,150,70)	64	GID-064	87.66	81.42	4.94	16.33	655.125	CDC Landmark	CWRS	2016
RLPSI (GPC=0)	GPC	BVC	Con	Weight-7	w(-5,-1,150,70)	61	GID-061	86.64	81.14	4.97	16.1	654.341	AAC Redberry	CWRS	2016
RLPSI (GPC=0)	GPC	BVC	Con	Weight-7	w(-5,-1,150,70)	114	GID-116	94.58	83.76	6.12	12.38	650.971	AAC Awesome	CWSP	2016
RLPSI (GPC=0)	GPC	BVC	Con	Weight-7	w(-5,-1,150,70)	102	GID-104	90.58	80.8	5.49	14.23	649.447	Faller	CNHR	2018
RLPSI (GPC=0)	GPC	BVC	Con	Weight-7	w(-5,-1,150,70)	21	GID-021	90.06	74.07	5.05	15.44	649.267	AAC Viewfield	CWRS	2016
RLPSI (GPC=0)	GPC	BVC	Con	Weight-7	w(-5,-1,150,70)	2	GID-002	89.61	84.79	4.86	16.7	647.77	5605HR CL	CNHR	2013
RLPSI (GPC=0)	GPC	BVC	Con	Weight-7	w(-5,-1,150,70)	186	GID-188	88.12	72.88	4.81	16.03	646.445	SY 433	CWRS	2012
RLPSI (GPC=0)	GPC	BVC	Con	Weight-7	w(-5,-1,150,70)	67	GID-067	94.04	71.95	5.28	14.63	646.41	BW5020	CWRS	0
RLPSI (GPC=0)	GPC	BVC	Con	Weight-7	w(-5,-1,150,70)	65	GID-065	86.61	90.12	5.17	15.53	644.778	Zealand	CWRS	2016
RLPSI (GPC=0)	GPC	BVC	Con	Weight-7	w(-5,-1,150,70)	94	GID-096	94.03	85.01	5.25	15.44	644.388	CDN Bison	CWES	2009
RLPSI (GPC=0)	GPC	BVC	Con	Weight-8	w(-1,-1,130,70)	62	GID-062	90.48	78.59	5.64	15.15	928.341	AAC Goodwin	CPSR	2017
RLPSI (GPC=0)	GPC	BVC	Con	Weight-8	w(-1,-1,130,70)	122	GID-124	93.38	74.63	4.97	16.63	918.644	AAC Castle	CPSR	2018
RLPSI (GPC=0)	GPC	BVC	Con	Weight-8	w(-1,-1,130,70)	151	GID-153	97.34	77.16	5.86	13.54	913.022	Pasteur	CWSP	2011
RLPSI (GPC=0)	GPC	BVC	Con	Weight-8	w(-1,-1,130,70)	113	GID-115	92.99	82.06	5.85	13.97	911.908	CDC Throttle	CWSP	2016
RLPSI (GPC=0)	GPC	BVC	Con	Weight-8	w(-1,-1,130,70)	97	GID-099	91.71	84.45	5.16	16.36	911.789	Conquer	CNHR	2010
RLPSI (GPC=0)	GPC	BVC	Con	Weight-8	w(-1,-1,130,70)	7	GID-007	91.03	78.13	5.24	15.72	909.512	AAC Brandon	CWRS	2013
RLPSI (GPC=0)	GPC	BVC	Con	Weight-8	w(-1,-1,130,70)	16	GID-016	91.39	72.43	5.2	15.33	903.723	AAC Penhold	CPSR	2014
RLPSI (GPC=0)	GPC	BVC	Con	Weight-8	w(-1,-1,130,70)	120	GID-122	92.37	72.54	5.22	15.16	901.728	SY Rowyn	CPSR	2016
RLPSI (GPC=0)	GPC	BVC	Con	Weight-8	w(-1,-1,130,70)	159	GID-161	87.28	79.08	5.07	16.11	899.311	CDC Hughes	CWRS	2016
RLPSI (GPC=0)	GPC	BVC	Con	Weight-8	w(-1,-1,130,70)	184	GID-186	95.3	82.67	6.56	11.15	898.494	SWS52	CWSWS	1905
RLPSI (GPC=0)	GPC	BVC	Con	Weight-8	w(-1,-1,130,70)	94	GID-096	94.03	85.01	5.25	15.44	895.89	CDN Bison	CWES	2009
RLPSI (GPC=0)	GPC	BVC	Con	Weight-8	w(-1,-1,130,70)	67	GID-067	94.04	71.95	5.28	14.63	895.045	BW5020	CWRS	0
RLPSI (GPC=0)	GPC	BVC	Con	Weight-8	w(-1,-1,130,70)	2	GID-002	89.61	84.79	4.86	16.7	891.239	5605HR CL	CNHR	2013
RLPSI (GPC=0)	GPC	BVC	Con	Weight-8	w(-1,-1,130,70)	114	GID-116	94.58	83.76	6.12	12.38	890.878	AAC Awesome	CWSP	2016
RLPSI (GPC=0)	GPC	BVC	Con	Weight-8	w(-1,-1,130,70)	64	GID-064	87.66	81.42	4.94	16.33	890.734	CDC Landmark	CWRS	2016
RLPSI (GPC=0)	GPC	BVC	Con	Weight-8	w(-1,-1,130,70)	21	GID-021	90.06	74.07	5.05	15.44	889.258	AAC Viewfield	CWRS	2016
RLPSI (GPC=0)	GPC	BVC	Con	Weight-8	w(-1,-1,130,70)	4	GID-004	92.62	77.38	4.95	15.81	888.757	5701PR	CPSR	2002
RLPSI (GPC=0)	GPC	BVC	Con	Weight-8	w(-1,-1,130,70)	61	GID-061	86.64	81.14	4.97	16.1	886.181	AAC Redberry	CWRS	2016
RLPSI (GPC=0)	GPC	BVC	Con	Weight-8	w(-1,-1,130,70)	102	GID-104	90.58	80.8	5.49	14.23	885.665	Faller	CNHR	2018
RLPSI (GPC=0)	GPC	BVC	Con	Weight-8	w(-1,-1,130,70)	181	GID-183	89.61	79.64	4.9	16.09	885.257	Stettler	CWRS	2008
RLPSI (GPC=0)	GPC	BVC	Con	Weight-9	w(-5,-1,130,70)	62	GID-062	90.48	78.59	5.64	15.15	529.753	AAC Goodwin	CPSR	2017
RLPSI (GPC=0)	GPC	BVC	Con	Weight-9	w(-5,-1,130,70)	113	GID-115	92.99	82.06	5.85	13.97	510.047	CDC Throttle	CWSP	2016
RLPSI (GPC=0)	GPC	BVC	Con	Weight-9	w(-5,-1,130,70)	159	GID-161	87.28	79.08	5.07	16.11	507.743	CDC Hughes	CWRS	2016
RLPSI (GPC=0)	GPC	BVC	Con	Weight-9	w(-5,-1,130,70)	7	GID-007	91.03	78.13	5.24	15.72	506.788	AAC Brandon	CWRS	2013
RLPSI (GPC=0)	GPC	BVC	Con	Weight-9	w(-5,-1,130,70)	122	GID-124	93.38	74.63	4.97	16.63	503.892	AAC Castle	CPSR	2018
RLPSI (GPC=0)	GPC	BVC	Con	Weight-9	w(-5,-1,130,70)	97	GID-099	91.71	84.45	5.16	16.36	503.318	Conquer	CNHR	2010
RLPSI (GPC=0)	GPC	BVC	Con	Weight-9	w(-5,-1,130,70)	16	GID-016	91.39	72.43	5.2	15.33	502.062	AAC Penhold	CPSR	2014
RLPSI (GPC=0)	GPC	BVC	Con	Weight-9	w(-5,-1,130,70)	184	GID-186	95.3	82.67	6.56	11.15	501.637	SWS52	CWSWS	1905
RLPSI (GPC=0)	GPC	BVC	Con	Weight-9	w(-5,-1,130,70)	151	GID-153	97.34	77.16	5.86	13.54	498.578	Pasteur	CWSP	2011
RLPSI (GPC=0)	GPC	BVC	Con	Weight-9	w(-5,-1,130,70)	120	GID-122	92.37	72.54	5.22	15.16	497.503	SY Rowyn	CPSR	2016
RLPSI (GPC=0)	GPC	BVC	Con	Weight-9	w(-5,-1,130,70)	61	GID-061	86.64	81.14	4.97	16.1	496.89	AAC Redberry	CWRS	2016
RLPSI (GPC=0)	GPC	BVC	Con	Weight-9	w(-5,-1,130,70)	64	GID-064	87.66	81.42	4.94	16.33	496.821	CDC Landmark	CWRS	2016
RLPSI (GPC=0)	GPC	BVC	Con	Weight-9	w(-5,-1,130,70)	21	GID-021	90.06	74.07	5.05	15.44	491.747	AAC Viewfield	CWRS	2016
RLPSI (GPC=0)	GPC	BVC	Con	Weight-9	w(-5,-1,130,70)	102	GID-104	90.58	80.8	5.49	14.23	491.379	Faller	CNHR	2018
RLPSI (GPC=0)	GPC	BVC	Con	Weight-9	w(-5,-1,130,70)	114	GID-116	94.58	83.76	6.12	12.38	490.956	AAC Awesome	CWSP	2016
RLPSI (GPC=0)	GPC	BVC	Con	Weight-9	w(-5,-1,130,70)	186	GID-188	88.12	72.88	4.81	16.03	490.28	SY 433	CWRS	2012
RLPSI (GPC=0)	GPC	BVC	Con	Weight-9	w(-5,-1,130,70)	2	GID-002	89.61	84.79	4.86	16.7	488.708	5605HR CL	CNHR	2013
RLPSI (GPC=0)	GPC	BVC	Con	Weight-9	w(-5,-1,130,70)	65	GID-065	86.61	90.12	5.17	15.53	487.8	Zealand	CWRS	2016
RLPSI (GPC=0)	GPC	BVC	Con	Weight-9	w(-5,-1,130,70)	67	GID-067	94.04	71.95	5.28	14.63	487.649	BW5020	CWRS	0
RLPSI (GPC=0)	GPC	BVC	Con	Weight-9	w(-5,-1,130,70)	181	GID-183	89.61	79.64	4.9	16.09	485.977	Stettler	CWRS	2008
RLPSI (GPC=0)	GPC	BVC	Con	Weight-10	w(-1,-1,120,70)	62	GID-062	90.48	78.59	5.64	15.15	846.227	AAC Goodwin	CPSR	2017
RLPSI (GPC=0)	GPC	BVC	Con	Weight-10	w(-1,-1,120,70)	122	GID-124	93.38	74.63	4.97	16.63	837.421	AAC Castle	CPSR	2018
RLPSI (GPC=0)	GPC	BVC	Con	Weight-10	w(-1,-1,120,70)	151	GID-153	97.34	77.16	5.86	13.54	831.624	Pasteur	CWSP	2011
RLPSI (GPC=0)	GPC	BVC	Con	Weight-10	w(-1,-1,120,70)	113	GID-115	92.99	82.06	5.85	13.97	830.59	CDC Throttle	CWSP	2016
RLPSI (GPC=0)	GPC	BVC	Con	Weight-10	w(-1,-1,120,70)	97	GID-099	91.71	84.45	5.16	16.36	830.537	Conquer	CNHR	2010
RLPSI (GPC=0)	GPC	BVC	Con	Weight-10	w(-1,-1,120,70)	7	GID-007	91.03	78.13	5.24	15.72	828.87	AAC Brandon	CWRS	2013
RLPSI (GPC=0)	GPC	BVC	Con	Weight-10	w(-1,-1,120,70)	16	GID-016	91.39	72.43	5.2	15.33	823.862	AAC Penhold	CPSR	2014
RLPSI (GPC=0)	GPC	BVC	Con	Weight-10	w(-1,-1,120,70)	120	GID-122	92.37	72.54	5.22	15.16	821.937	SY Rowyn	CPSR	2016
RLPSI (GPC=0)	GPC	BVC	Con	Weight-10	w(-1,-1,120,70)	159	GID-161	87.28	79.08	5.07	16.11	819.669	CDC Hughes	CWRS	2016
RLPSI (GPC=0)	GPC	BVC	Con	Weight-10	w(-1,-1,120,70)	184	GID-186	95.3	82.67	6.56	11.15	817.858	SWS52	CWSWS	1905
RLPSI (GPC=0)	GPC	BVC	Con	Weight-10	w(-1,-1,120,70)	67	GID-067	94.04	71.95	5.28	14.63	815.665	BW5020	CWRS	0
RLPSI (GPC=0)	GPC	BVC	Con	Weight-10	w(-1,-1,120,70)	94	GID-096	94.03	85.01	5.25	15.44	815.616	CDN Bison	CWES	2009
RLPSI (GPC=0)	GPC	BVC	Con	Weight-10	w(-1,-1,120,70)	2	GID-002	89.61	84.79	4.86	16.7	811.709	5605HR CL	CNHR	2013
RLPSI (GPC=0)	GPC	BVC	Con	Weight-10	w(-1,-1,120,70)	64	GID-064	87.66	81.42	4.94	16.33	811.582	CDC Landmark	CWRS	2016
RLPSI (GPC=0)	GPC	BVC	Con	Weight-10	w(-1,-1,120,70)	114	GID-116	94.58	83.76	6.12	12.38	810.871	AAC Awesome	CWSP	2016
RLPSI (GPC=0)	GPC	BVC	Con	Weight-10	w(-1,-1,120,70)	21	GID-021	90.06	74.07	5.05	15.44	810.498	AAC Viewfield	CWRS	2016
RLPSI (GPC=0)	GPC	BVC	Con	Weight-10	w(-1,-1,120,70)	4	GID-004	92.62	77.38	4.95	15.81	809.658	5701PR	CPSR	2002
RLPSI (GPC=0)	GPC	BVC	Con	Weight-10	w(-1,-1,120,70)	61	GID-061	86.64	81.14	4.97	16.1	807.455	AAC Redberry	CWRS	2016
RLPSI (GPC=0)	GPC	BVC	Con	Weight-10	w(-1,-1,120,70)	102	GID-104	90.58	80.8	5.49	14.23	806.631	Faller	CNHR	2018
RLPSI (GPC=0)	GPC	BVC	Con	Weight-10	w(-1,-1,120,70)	181	GID-183	89.61	79.64	4.9	16.09	806.499	Stettler	CWRS	2008
RLPSI (GPC=0)	GPC	BVC	Org	Weight-6	w(-1,-1,150,70)	97	GID-099	89.92	91.43	6.17	14.7	968.017	Conquer	CNHR	2010
RLPSI (GPC=0)	GPC	BVC	Org	Weight-6	w(-1,-1,150,70)	62	GID-062	89	82.51	6	14.63	963.251	AAC Goodwin	CPSR	2017
RLPSI (GPC=0)	GPC	BVC	Org	Weight-6	w(-1,-1,150,70)	113	GID-115	91.82	83.07	6.41	13.08	954.972	CDC Throttle	CWSP	2016
RLPSI (GPC=0)	GPC	BVC	Org	Weight-6	w(-1,-1,150,70)	21	GID-021	88.16	73.59	5.57	14.79	941.138	AAC Viewfield	CWRS	2016
RLPSI (GPC=0)	GPC	BVC	Org	Weight-6	w(-1,-1,150,70)	7	GID-007	88.69	79.6	5.38	15.49	935.857	AAC Brandon	CWRS	2013
RLPSI (GPC=0)	GPC	BVC	Org	Weight-6	w(-1,-1,150,70)	122	GID-124	90.27	77.72	5.53	14.78	932.125	AAC Castle	CPSR	2018
RLPSI (GPC=0)	GPC	BVC	Org	Weight-6	w(-1,-1,150,70)	102	GID-104	88.63	82.56	6.02	13.47	928.548	Faller	CNHR	2018
RLPSI (GPC=0)	GPC	BVC	Org	Weight-6	w(-1,-1,150,70)	78	GID-079	86.4	89.16	5.33	15.92	927.491	CDC Imagine	CWRS	2002
RLPSI (GPC=0)	GPC	BVC	Org	Weight-6	w(-1,-1,150,70)	119	GID-121	86.38	78.97	5.74	14.13	926.617	CDC Cordon CLPlus	CNHR	2018
RLPSI (GPC=0)	GPC	BVC	Org	Weight-6	w(-1,-1,150,70)	114	GID-116	91.62	79.85	6.5	11.72	925.995	AAC Awesome	CWSP	2016
RLPSI (GPC=0)	GPC	BVC	Org	Weight-6	w(-1,-1,150,70)	65	GID-065	84.69	95.53	5.5	15.62	922.688	Zealand	CWRS	2016
RLPSI (GPC=0)	GPC	BVC	Org	Weight-6	w(-1,-1,150,70)	16	GID-016	88.48	73.71	5.23	15.15	920.28	AAC Penhold	CPSR	2014
RLPSI (GPC=0)	GPC	BVC	Org	Weight-6	w(-1,-1,150,70)	13	GID-013	88.5	83.02	5.72	14.11	919.319	AAC Foray	CPSR	2014
RLPSI (GPC=0)	GPC	BVC	Org	Weight-6	w(-1,-1,150,70)	11	GID-011	88.8	78.44	5.35	14.96	918.406	AAC Elie	CWRS	2013
RLPSI (GPC=0)	GPC	BVC	Org	Weight-6	w(-1,-1,150,70)	184	GID-186	93.48	78.68	6.74	10.58	916.438	SWS52	CWSWS	1905
RLPSI (GPC=0)	GPC	BVC	Org	Weight-6	w(-1,-1,150,70)	183	GID-185	86.92	83.44	5.6	14.42	915.727	Superb	CWRS	2001
RLPSI (GPC=0)	GPC	BVC	Org	Weight-6	w(-1,-1,150,70)	189	GID-191	89.12	82.04	5.71	13.93	914.806	SY985	CPSR	2011
RLPSI (GPC=0)	GPC	BVC	Org	Weight-6	w(-1,-1,150,70)	2	GID-002	88.36	89.58	5.17	15.93	913.551	5605HR CL	CNHR	2013
RLPSI (GPC=0)	GPC	BVC	Org	Weight-6	w(-1,-1,150,70)	5	GID-005	89.76	84.05	5.92	13.34	913.547	5702PR	CPSR	2008
RLPSI (GPC=0)	GPC	BVC	Org	Weight-6	w(-1,-1,150,70)	137	GID-139	85.25	88.64	5.07	16.18	910.935	Lillian	CNHR	2003
RLPSI (GPC=0)	GPC	BVC	Org	Weight-7	w(-5,-1,150,70)	97	GID-099	89.92	91.43	6.17	14.7	614.588	Conquer	CNHR	2010
RLPSI (GPC=0)	GPC	BVC	Org	Weight-7	w(-5,-1,150,70)	62	GID-062	89	82.51	6	14.63	613.535	AAC Goodwin	CPSR	2017
RLPSI (GPC=0)	GPC	BVC	Org	Weight-7	w(-5,-1,150,70)	113	GID-115	91.82	83.07	6.41	13.08	603.135	CDC Throttle	CWSP	2016
RLPSI (GPC=0)	GPC	BVC	Org	Weight-7	w(-5,-1,150,70)	21	GID-021	88.16	73.59	5.57	14.79	594.04	AAC Viewfield	CWRS	2016
RLPSI (GPC=0)	GPC	BVC	Org	Weight-7	w(-5,-1,150,70)	119	GID-121	86.38	78.97	5.74	14.13	587.618	CDC Cordon CLPlus	CNHR	2018
RLPSI (GPC=0)	GPC	BVC	Org	Weight-7	w(-5,-1,150,70)	102	GID-104	88.63	82.56	6.02	13.47	585.158	Faller	CNHR	2018
RLPSI (GPC=0)	GPC	BVC	Org	Weight-7	w(-5,-1,150,70)	7	GID-007	88.69	79.6	5.38	15.49	583.829	AAC Brandon	CWRS	2013
RLPSI (GPC=0)	GPC	BVC	Org	Weight-7	w(-5,-1,150,70)	65	GID-065	84.69	95.53	5.5	15.62	581.638	Zealand	CWRS	2016
RLPSI (GPC=0)	GPC	BVC	Org	Weight-7	w(-5,-1,150,70)	114	GID-116	91.62	79.85	6.5	11.72	580.96	AAC Awesome	CWSP	2016
RLPSI (GPC=0)	GPC	BVC	Org	Weight-7	w(-5,-1,150,70)	78	GID-079	86.4	89.16	5.33	15.92	580.219	CDC Imagine	CWRS	2002
RLPSI (GPC=0)	GPC	BVC	Org	Weight-7	w(-5,-1,150,70)	122	GID-124	90.27	77.72	5.53	14.78	578.36	AAC Castle	CPSR	2018
RLPSI (GPC=0)	GPC	BVC	Org	Weight-7	w(-5,-1,150,70)	13	GID-013	88.5	83.02	5.72	14.11	573.657	AAC Foray	CPSR	2014
RLPSI (GPC=0)	GPC	BVC	Org	Weight-7	w(-5,-1,150,70)	183	GID-185	86.92	83.44	5.6	14.42	573.641	Superb	CWRS	2001
RLPSI (GPC=0)	GPC	BVC	Org	Weight-7	w(-5,-1,150,70)	16	GID-016	88.48	73.71	5.23	15.15	570.814	AAC Penhold	CPSR	2014
RLPSI (GPC=0)	GPC	BVC	Org	Weight-7	w(-5,-1,150,70)	184	GID-186	93.48	78.68	6.74	10.58	570.626	SWS52	CWSWS	1905
RLPSI (GPC=0)	GPC	BVC	Org	Weight-7	w(-5,-1,150,70)	11	GID-011	88.8	78.44	5.35	14.96	568.488	AAC Elie	CWRS	2013
RLPSI (GPC=0)	GPC	BVC	Org	Weight-7	w(-5,-1,150,70)	189	GID-191	89.12	82.04	5.71	13.93	568.082	SY985	CPSR	2011
RLPSI (GPC=0)	GPC	BVC	Org	Weight-7	w(-5,-1,150,70)	159	GID-161	86.28	79.27	5.2	15.28	567.42	CDC Hughes	CWRS	2016
RLPSI (GPC=0)	GPC	BVC	Org	Weight-7	w(-5,-1,150,70)	5	GID-005	89.76	84.05	5.92	13.34	567.235	5702PR	CPSR	2008
RLPSI (GPC=0)	GPC	BVC	Org	Weight-7	w(-5,-1,150,70)	137	GID-139	85.25	88.64	5.07	16.18	566.274	Lillian	CNHR	2003
RLPSI (GPC=0)	GPC	BVC	Org	Weight-8	w(-1,-1,130,70)	97	GID-099	89.92	91.43	6.17	14.7	822.23	Conquer	CNHR	2010
RLPSI (GPC=0)	GPC	BVC	Org	Weight-8	w(-1,-1,130,70)	62	GID-062	89	82.51	6	14.63	819.156	AAC Goodwin	CPSR	2017
RLPSI (GPC=0)	GPC	BVC	Org	Weight-8	w(-1,-1,130,70)	113	GID-115	91.82	83.07	6.41	13.08	811.259	CDC Throttle	CWSP	2016
RLPSI (GPC=0)	GPC	BVC	Org	Weight-8	w(-1,-1,130,70)	21	GID-021	88.16	73.59	5.57	14.79	801.078	AAC Viewfield	CWRS	2016
RLPSI (GPC=0)	GPC	BVC	Org	Weight-8	w(-1,-1,130,70)	7	GID-007	88.69	79.6	5.38	15.49	795.934	AAC Brandon	CWRS	2013
RLPSI (GPC=0)	GPC	BVC	Org	Weight-8	w(-1,-1,130,70)	122	GID-124	90.27	77.72	5.53	14.78	792.567	AAC Castle	CPSR	2018
RLPSI (GPC=0)	GPC	BVC	Org	Weight-8	w(-1,-1,130,70)	102	GID-104	88.63	82.56	6.02	13.47	788.852	Faller	CNHR	2018
RLPSI (GPC=0)	GPC	BVC	Org	Weight-8	w(-1,-1,130,70)	78	GID-079	86.4	89.16	5.33	15.92	788.001	CDC Imagine	CWRS	2002
RLPSI (GPC=0)	GPC	BVC	Org	Weight-8	w(-1,-1,130,70)	119	GID-121	86.38	78.97	5.74	14.13	787.969	CDC Cordon CLPlus	CNHR	2018
RLPSI (GPC=0)	GPC	BVC	Org	Weight-8	w(-1,-1,130,70)	114	GID-116	91.62	79.85	6.5	11.72	786.213	AAC Awesome	CWSP	2016
RLPSI (GPC=0)	GPC	BVC	Org	Weight-8	w(-1,-1,130,70)	65	GID-065	84.69	95.53	5.5	15.62	783.28	Zealand	CWRS	2016
RLPSI (GPC=0)	GPC	BVC	Org	Weight-8	w(-1,-1,130,70)	16	GID-016	88.48	73.71	5.23	15.15	783.017	AAC Penhold	CPSR	2014
RLPSI (GPC=0)	GPC	BVC	Org	Weight-8	w(-1,-1,130,70)	13	GID-013	88.5	83.02	5.72	14.11	780.951	AAC Foray	CPSR	2014
RLPSI (GPC=0)	GPC	BVC	Org	Weight-8	w(-1,-1,130,70)	11	GID-011	88.8	78.44	5.35	14.96	780.802	AAC Elie	CWRS	2013
RLPSI (GPC=0)	GPC	BVC	Org	Weight-8	w(-1,-1,130,70)	183	GID-185	86.92	83.44	5.6	14.42	778.04	Superb	CWRS	2001
RLPSI (GPC=0)	GPC	BVC	Org	Weight-8	w(-1,-1,130,70)	184	GID-186	93.48	78.68	6.74	10.58	777.594	SWS52	CWSWS	1905
RLPSI (GPC=0)	GPC	BVC	Org	Weight-8	w(-1,-1,130,70)	189	GID-191	89.12	82.04	5.71	13.93	777.033	SY985	CPSR	2011
RLPSI (GPC=0)	GPC	BVC	Org	Weight-8	w(-1,-1,130,70)	2	GID-002	88.36	89.58	5.17	15.93	775.641	5605HR CL	CNHR	2013
RLPSI (GPC=0)	GPC	BVC	Org	Weight-8	w(-1,-1,130,70)	5	GID-005	89.76	84.05	5.92	13.34	775.524	5702PR	CPSR	2008
RLPSI (GPC=0)	GPC	BVC	Org	Weight-8	w(-1,-1,130,70)	159	GID-161	86.28	79.27	5.2	15.28	774.555	CDC Hughes	CWRS	2016
RLPSI (GPC=0)	GPC	BVC	Org	Weight-9	w(-5,-1,130,70)	62	GID-062	89	82.51	6	14.63	469.44	AAC Goodwin	CPSR	2017
RLPSI (GPC=0)	GPC	BVC	Org	Weight-9	w(-5,-1,130,70)	97	GID-099	89.92	91.43	6.17	14.7	468.802	Conquer	CNHR	2010
RLPSI (GPC=0)	GPC	BVC	Org	Weight-9	w(-5,-1,130,70)	113	GID-115	91.82	83.07	6.41	13.08	459.422	CDC Throttle	CWSP	2016
RLPSI (GPC=0)	GPC	BVC	Org	Weight-9	w(-5,-1,130,70)	21	GID-021	88.16	73.59	5.57	14.79	453.98	AAC Viewfield	CWRS	2016
RLPSI (GPC=0)	GPC	BVC	Org	Weight-9	w(-5,-1,130,70)	119	GID-121	86.38	78.97	5.74	14.13	448.97	CDC Cordon CLPlus	CNHR	2018
RLPSI (GPC=0)	GPC	BVC	Org	Weight-9	w(-5,-1,130,70)	102	GID-104	88.63	82.56	6.02	13.47	445.462	Faller	CNHR	2018
RLPSI (GPC=0)	GPC	BVC	Org	Weight-9	w(-5,-1,130,70)	7	GID-007	88.69	79.6	5.38	15.49	443.906	AAC Brandon	CWRS	2013
RLPSI (GPC=0)	GPC	BVC	Org	Weight-9	w(-5,-1,130,70)	65	GID-065	84.69	95.53	5.5	15.62	442.23	Zealand	CWRS	2016
RLPSI (GPC=0)	GPC	BVC	Org	Weight-9	w(-5,-1,130,70)	114	GID-116	91.62	79.85	6.5	11.72	441.178	AAC Awesome	CWSP	2016
RLPSI (GPC=0)	GPC	BVC	Org	Weight-9	w(-5,-1,130,70)	78	GID-079	86.4	89.16	5.33	15.92	440.728	CDC Imagine	CWRS	2002
RLPSI (GPC=0)	GPC	BVC	Org	Weight-9	w(-5,-1,130,70)	122	GID-124	90.27	77.72	5.53	14.78	438.802	AAC Castle	CPSR	2018
RLPSI (GPC=0)	GPC	BVC	Org	Weight-9	w(-5,-1,130,70)	183	GID-185	86.92	83.44	5.6	14.42	435.954	Superb	CWRS	2001
RLPSI (GPC=0)	GPC	BVC	Org	Weight-9	w(-5,-1,130,70)	13	GID-013	88.5	83.02	5.72	14.11	435.288	AAC Foray	CPSR	2014
RLPSI (GPC=0)	GPC	BVC	Org	Weight-9	w(-5,-1,130,70)	16	GID-016	88.48	73.71	5.23	15.15	433.55	AAC Penhold	CPSR	2014
RLPSI (GPC=0)	GPC	BVC	Org	Weight-9	w(-5,-1,130,70)	184	GID-186	93.48	78.68	6.74	10.58	431.782	SWS52	CWSWS	1905
RLPSI (GPC=0)	GPC	BVC	Org	Weight-9	w(-5,-1,130,70)	159	GID-161	86.28	79.27	5.2	15.28	431.084	CDC Hughes	CWRS	2016
RLPSI (GPC=0)	GPC	BVC	Org	Weight-9	w(-5,-1,130,70)	11	GID-011	88.8	78.44	5.35	14.96	430.883	AAC Elie	CWRS	2013
RLPSI (GPC=0)	GPC	BVC	Org	Weight-9	w(-5,-1,130,70)	189	GID-191	89.12	82.04	5.71	13.93	430.309	SY985	CPSR	2011
RLPSI (GPC=0)	GPC	BVC	Org	Weight-9	w(-5,-1,130,70)	137	GID-139	85.25	88.64	5.07	16.18	429.228	Lillian	CNHR	2003
RLPSI (GPC=0)	GPC	BVC	Org	Weight-9	w(-5,-1,130,70)	5	GID-005	89.76	84.05	5.92	13.34	429.212	5702PR	CPSR	2008
RLPSI (GPC=0)	GPC	BVC	Org	Weight-10	w(-1,-1,120,70)	97	GID-099	89.92	91.43	6.17	14.7	749.337	Conquer	CNHR	2010
RLPSI (GPC=0)	GPC	BVC	Org	Weight-10	w(-1,-1,120,70)	62	GID-062	89	82.51	6	14.63	747.109	AAC Goodwin	CPSR	2017
RLPSI (GPC=0)	GPC	BVC	Org	Weight-10	w(-1,-1,120,70)	113	GID-115	91.82	83.07	6.41	13.08	739.402	CDC Throttle	CWSP	2016
RLPSI (GPC=0)	GPC	BVC	Org	Weight-10	w(-1,-1,120,70)	21	GID-021	88.16	73.59	5.57	14.79	731.048	AAC Viewfield	CWRS	2016
RLPSI (GPC=0)	GPC	BVC	Org	Weight-10	w(-1,-1,120,70)	7	GID-007	88.69	79.6	5.38	15.49	725.973	AAC Brandon	CWRS	2013
RLPSI (GPC=0)	GPC	BVC	Org	Weight-10	w(-1,-1,120,70)	122	GID-124	90.27	77.72	5.53	14.78	722.788	AAC Castle	CPSR	2018
RLPSI (GPC=0)	GPC	BVC	Org	Weight-10	w(-1,-1,120,70)	102	GID-104	88.63	82.56	6.02	13.47	719.005	Faller	CNHR	2018
RLPSI (GPC=0)	GPC	BVC	Org	Weight-10	w(-1,-1,120,70)	119	GID-121	86.38	78.97	5.74	14.13	718.645	CDC Cordon CLPlus	CNHR	2018
RLPSI (GPC=0)	GPC	BVC	Org	Weight-10	w(-1,-1,120,70)	78	GID-079	86.4	89.16	5.33	15.92	718.256	CDC Imagine	CWRS	2002
RLPSI (GPC=0)	GPC	BVC	Org	Weight-10	w(-1,-1,120,70)	114	GID-116	91.62	79.85	6.5	11.72	716.323	AAC Awesome	CWSP	2016
RLPSI (GPC=0)	GPC	BVC	Org	Weight-10	w(-1,-1,120,70)	16	GID-016	88.48	73.71	5.23	15.15	714.385	AAC Penhold	CPSR	2014
RLPSI (GPC=0)	GPC	BVC	Org	Weight-10	w(-1,-1,120,70)	65	GID-065	84.69	95.53	5.5	15.62	713.576	Zealand	CWRS	2016
RLPSI (GPC=0)	GPC	BVC	Org	Weight-10	w(-1,-1,120,70)	11	GID-011	88.8	78.44	5.35	14.96	711.999	AAC Elie	CWRS	2013
RLPSI (GPC=0)	GPC	BVC	Org	Weight-10	w(-1,-1,120,70)	13	GID-013	88.5	83.02	5.72	14.11	711.766	AAC Foray	CPSR	2014
RLPSI (GPC=0)	GPC	BVC	Org	Weight-10	w(-1,-1,120,70)	183	GID-185	86.92	83.44	5.6	14.42	709.196	Superb	CWRS	2001
RLPSI (GPC=0)	GPC	BVC	Org	Weight-10	w(-1,-1,120,70)	184	GID-186	93.48	78.68	6.74	10.58	708.172	SWS52	CWSWS	1905
RLPSI (GPC=0)	GPC	BVC	Org	Weight-10	w(-1,-1,120,70)	189	GID-191	89.12	82.04	5.71	13.93	708.147	SY985	CPSR	2011
RLPSI (GPC=0)	GPC	BVC	Org	Weight-10	w(-1,-1,120,70)	2	GID-002	88.36	89.58	5.17	15.93	706.686	5605HR CL	CNHR	2013
RLPSI (GPC=0)	GPC	BVC	Org	Weight-10	w(-1,-1,120,70)	5	GID-005	89.76	84.05	5.92	13.34	706.512	5702PR	CPSR	2008
RLPSI (GPC=0)	GPC	BVC	Org	Weight-10	w(-1,-1,120,70)	159	GID-161	86.28	79.27	5.2	15.28	706.387	CDC Hughes	CWRS	2016

## Sheet: Statistics
Index	Restriced trait	Population	Management	Weight code	Economic weight	EGG (Mat)	EGG (Pht)	EGG (Yield)	EGG (GPC)	Response	Correlation
LPSI	None	BVC	Con	Weight-6	w(-1,-1,150,70)	-0.00587799	-0.582899	0.229256	1.04067	107.824	0.890681
LPSI	None	BVC	Con	Weight-7	w(-5,-1,150,70)	-0.95586	0.00205444	0.128456	1.22455	109.764	0.893096
LPSI	None	BVC	Con	Weight-8	w(-1,-1,130,70)	-0.515079	0.179763	0.119774	1.263	104.316	0.901702
LPSI	None	BVC	Con	Weight-9	w(-5,-1,130,70)	-1.45907	0.755574	0.0173123	1.42156	108.299	0.906833
LPSI	None	BVC	Con	Weight-10	w(-1,-1,120,70)	-0.776344	0.575913	0.0617156	1.36858	103.407	0.907999
LPSI	None	BVC	Org	Weight-6	w(-1,-1,150,70)	-0.745097	0.536989	0.153829	1.07271	98.3719	0.844136
LPSI	None	BVC	Org	Weight-7	w(-5,-1,150,70)	-1.5112	1.46535	0.0564422	1.26232	102.919	0.854555
LPSI	None	BVC	Org	Weight-8	w(-1,-1,130,70)	-1.24343	1.76381	0.0383711	1.31387	96.4384	0.859946
LPSI	None	BVC	Org	Weight-9	w(-5,-1,130,70)	-1.9645	2.60529	-0.054645	1.4684	102.901	0.873264
LPSI	None	BVC	Org	Weight-10	w(-1,-1,120,70)	-1.48647	2.37399	-0.0209188	1.42498	96.351	0.86923
RLPSI (GPC=0)	GPC	BVC	Con	Weight-6	w(-1,-1,150,70)	1.82339	-3.60507	0.594118	-2.40759e-16	90.8994	0.750875
RLPSI (GPC=0)	GPC	BVC	Con	Weight-7	w(-5,-1,150,70)	1.11059	-3.73048	0.578707	0	84.9835	0.691467
RLPSI (GPC=0)	GPC	BVC	Con	Weight-8	w(-1,-1,130,70)	1.79212	-3.69778	0.593228	0	79.0253	0.683093
RLPSI (GPC=0)	GPC	BVC	Con	Weight-9	w(-5,-1,130,70)	0.956332	-3.8323	0.572438	1.48943e-16	73.4675	0.615173
RLPSI (GPC=0)	GPC	BVC	Con	Weight-10	w(-1,-1,120,70)	1.77248	-3.75504	0.592612	-2.99399e-16	73.096	0.641844
RLPSI (GPC=0)	GPC	BVC	Org	Weight-6	w(-1,-1,150,70)	1.10862	-4.23853	0.529848	-5.29855e-16	82.6071	0.708857
RLPSI (GPC=0)	GPC	BVC	Org	Weight-7	w(-5,-1,150,70)	0.59944	-4.36141	0.518701	-2.76432e-16	79.1693	0.657357
RLPSI (GPC=0)	GPC	BVC	Org	Weight-8	w(-1,-1,130,70)	1.08387	-4.35642	0.528824	-3.03874e-16	72.0197	0.642203
RLPSI (GPC=0)	GPC	BVC	Org	Weight-9	w(-5,-1,130,70)	0.492993	-4.48733	0.513976	-6.35826e-16	68.8393	0.5842
RLPSI (GPC=0)	GPC	BVC	Org	Weight-10	w(-1,-1,120,70)	1.06841	-4.4288	0.52812	-6.55876e-16	66.7348	0.602047
RLPSI (yield=0)	Yield	BVC	Con	Weight-6	w(-1,-1,150,70)	-1.04766	0.990961	-1.06151e-16	1.47182	103.084	0.851528
RLPSI (yield=0)	Yield	BVC	Con	Weight-7	w(-5,-1,150,70)	-1.53464	0.871348	1.01064e-16	1.44958	108.273	0.880959
RLPSI (yield=0)	Yield	BVC	Con	Weight-8	w(-1,-1,130,70)	-1.04766	0.990961	0	1.47182	103.084	0.891057
RLPSI (yield=0)	Yield	BVC	Con	Weight-9	w(-5,-1,130,70)	-1.53464	0.871348	-1.01064e-16	1.44958	108.273	0.906611
RLPSI (yield=0)	Yield	BVC	Con	Weight-10	w(-1,-1,120,70)	-1.04766	0.990961	-1.06151e-16	1.47182	103.084	0.905166
RLPSI (yield=0)	Yield	BVC	Org	Weight-6	w(-1,-1,150,70)	-1.4017	2.16023	1.13612e-16	1.38675	96.3142	0.826479
RLPSI (yield=0)	Yield	BVC	Org	Weight-7	w(-5,-1,150,70)	-1.74623	2.05008	0	1.37073	102.632	0.852171
RLPSI (yield=0)	Yield	BVC	Org	Weight-8	w(-1,-1,130,70)	-1.4017	2.16023	2.27224e-16	1.38675	96.3142	0.858838
RLPSI (yield=0)	Yield	BVC	Org	Weight-9	w(-5,-1,130,70)	-1.74623	2.05008	0	1.37073	102.632	0.87098
RLPSI (yield=0)	Yield	BVC	Org	Weight-10	w(-1,-1,120,70)	-1.4017	2.16023	0	1.38675	96.3142	0.868897

## Sheet: Statistics summary
		LPSI		RLPSI (GPC=0)		RLPSI (yield=0)
Parameter	Stat	Con	Org	Con	Org	Con	Org
EGG (Mat)	N	5	5	5	5	5	5
	Min	-1.46	-1.96	0.96	0.49	-1.53	-1.75
	Max	-0.01	-0.75	1.82	1.11	-1.05	-1.4
	Mean	-0.742	-1.39	1.491	0.871	-1.242	-1.54
	Std Err	0.240258	0.198925	0.188543	0.133675	0.119285	0.084392
EGG (Pht)	N	5	5	5	5	5	5
	Min	-0.58	0.54	-3.83	-4.49	0.87	2.05
	Max	0.76	2.61	-3.61	-4.24	0.99	2.16
	Mean	0.186	1.749	-3.724	-4.374	0.943	2.116
	Std Err	0.234684	0.365616	0.0371255	0.0416335	0.0292991	0.0269797
EGG (Yield)	N	5	5	5	5	5	5
	Min	0.02	-0.05	0.57	0.51	0	0
	Max	0.23	0.15	0.59	0.53	0	0
	Mean	0.111	0.035	0.586	0.524	0	0
	Std Err	0.0357576	0.0358845	0.00446525	0.0031855	4.12003e-17	4.54448e-17
EGG (GPC)	N	5	5	5	5	5	5
	Min	1.04	1.07	0	0	1.45	1.37
	Max	1.42	1.47	0	0	1.47	1.39
	Mean	1.264	1.308	0	0	1.463	1.38
	Std Err	0.066028	0.0696044	8.34203e-17	8.06721e-17	0.00544718	0.0039258
Response	N	5	5	5	5	5	5
	Min	103.41	96.35	73.1	66.73	103.08	96.31
	Max	109.76	102.92	90.9	82.61	108.27	102.63
	Mean	106.722	99.396	80.294	73.874	105.16	98.841
	Std Err	1.21941	1.47927	3.42409	3.03366	1.27092	1.54752
Correlation	N	5	5	5	5	5	5
	Min	0.89	0.84	0.62	0.58	0.85	0.83
	Max	0.91	0.87	0.75	0.71	0.91	0.87
	Mean	0.9	0.86	0.676	0.639	0.887	0.855
	Std Err	0.00352185	0.00520656	0.0231961	0.021904	0.0100643	0.00801115
