# Supplementary material for: Identification of Spring Wheat with Superior Agronomic Performance under Contrasting Nitrogen Managements Using Linear Phenotypic Selection Indices
Source: Plants (Basel). 2022 Jul 20;11(14):1887. doi: 10.3390/plants11141887 (PMC9317689; doi:10.3390/plants11141887)
Supplement: Supplementary file 1 [file plants-11-01887-s001.zip › Table S7 29042022.xlsx]

## Sheet: All selected cultivars
Table S7 Summary of the phenotype data of 47 selected cultivars using five economic weights and the Smith Linear Phenotypic Selection Index (LPSI) and the Kempthorne and Nordskog Restrictive Linear Phenotypic Selection Index (RLPSI). Both the LPSI and RLPSI were computed using the best linear unbiased estimators (BLUEs) computed from 5 conventionally and 4 organically managed environments separat…
						w(-1,-1,120,70)				w(-1,-1,130,70)				w(-1,-1,150,70)				w(-5,-1,130,70)				w(-5,-1,150,70)
Cultivar	Management	Market class	Index	Institution	Selected donors (N=22)	Maturity	Height	Yield	GPC	Maturity	Height	Yield	GPC	Maturity	Height	Yield	GPC	Maturity	Height	Yield	GPC	Maturity	Height	Yield	GPC	Comments on economic weights	Comments based on management and indexes	Overall comments (Economic weights-Indexes-Managements)	Comment for organic donor
5605HR CL	Con	CNHR	LPSI	Syngenta Canada Inc.	Yes (N=22)	89.61	84.79	4.86	16.7	89.61	84.79	4.86	16.7	89.61	84.79	4.86	16.7	89.61	84.79	4.86	16.7	89.61	84.79	4.86	16.7	Selected in all 5 weights	LPS (Con-Org); RLPSI (GPC restricted): Con & Org; RLPSI (Yld restricted): Con & Org	Selected in all 5 weights (LPS (Con-Org); RLPSI (GPC restricted): Con & Org; RLPSI (Yld restricted): Con & Org)
5605HR CL	Con	CNHR	RLPSI (GPC restricted)	Syngenta Canada Inc.	Yes (N=22)	89.61	84.79	4.86	16.7	89.61	84.79	4.86	16.7	89.61	84.79	4.86	16.7	89.61	84.79	4.86	16.7	89.61	84.79	4.86	16.7	Selected in all 5 weights	LPS (Con-Org); RLPSI (GPC restricted): Con & Org; RLPSI (Yld restricted): Con & Org	Selected in all 5 weights (LPS (Con-Org); RLPSI (GPC restricted): Con & Org; RLPSI (Yld restricted): Con & Org)
5605HR CL	Con	CNHR	RLPSI (Yld restricted)	Syngenta Canada Inc.	Yes (N=22)	89.61	84.79	4.86	16.7	89.61	84.79	4.86	16.7	89.61	84.79	4.86	16.7	89.61	84.79	4.86	16.7	89.61	84.79	4.86	16.7	Selected in all 5 weights	LPS (Con-Org); RLPSI (GPC restricted): Con & Org; RLPSI (Yld restricted): Con & Org	Selected in all 5 weights (LPS (Con-Org); RLPSI (GPC restricted): Con & Org; RLPSI (Yld restricted): Con & Org)
5605HR CL	Org	CNHR	LPSI	Syngenta Canada Inc.	Yes (N=22)	88.36	89.58	5.17	15.93	88.36	89.58	5.17	15.93	88.36	89.58	5.17	15.93	88.36	89.58	5.17	15.93	88.36	89.58	5.17	15.93	Selected in all 5 weights	LPS (Con-Org); RLPSI (GPC restricted): Con & Org; RLPSI (Yld restricted): Con & Org	Selected in all 5 weights (LPS (Con-Org); RLPSI (GPC restricted): Con & Org; RLPSI (Yld restricted): Con & Org)	Best
5605HR CL	Org	CNHR	RLPSI (GPC restricted)	Syngenta Canada Inc.	Yes (N=22)	88.36	89.58	5.17	15.93	88.36	89.58	5.17	15.93	88.36	89.58	5.17	15.93									Selected in 3 weights	LPS (Con-Org); RLPSI (GPC restricted): Con & Org; RLPSI (Yld restricted): Con & Org	Selected in 3 weights (LPS (Con-Org); RLPSI (GPC restricted): Con & Org; RLPSI (Yld restricted): Con & Org)
5605HR CL	Org	CNHR	RLPSI (Yld restricted)	Syngenta Canada Inc.	Yes (N=22)	88.36	89.58	5.17	15.93	88.36	89.58	5.17	15.93	88.36	89.58	5.17	15.93	88.36	89.58	5.17	15.93	88.36	89.58	5.17	15.93	Selected in all 5 weights	LPS (Con-Org); RLPSI (GPC restricted): Con & Org; RLPSI (Yld restricted): Con & Org	Selected in all 5 weights (LPS (Con-Org); RLPSI (GPC restricted): Con & Org; RLPSI (Yld restricted): Con & Org)	Best
5701PR	Con	CPSR	LPSI	Nutrien AG Solutions Inc.						92.62	77.38	4.95	15.81	92.62	77.38	4.95	15.81									Selected in 2 weights	LPS (Con), RLPSI (GPC restricted) Con	Selected in 2 weights (LPS (Con), RLPSI (GPC restricted) Con)
5701PR	Con	CPSR	RLPSI (GPC restricted)	Nutrien AG Solutions Inc.		92.62	77.38	4.95	15.81	92.62	77.38	4.95	15.81	92.62	77.38	4.95	15.81									Selected in 3 weights	LPS (Con), RLPSI (GPC restricted) Con	Selected in 3 weights (LPS (Con), RLPSI (GPC restricted) Con)
5702PR	Org	CPSR	RLPSI (GPC restricted)	Syngenta Canada Inc.		89.76	84.05	5.92	13.34	89.76	84.05	5.92	13.34	89.76	84.05	5.92	13.34	89.76	84.05	5.92	13.34	89.76	84.05	5.92	13.34	Selected in all 5 weights	RLPSI (GPC restricted): Org	Selected in all 5 weights (RLPSI (GPC restricted): Org)
AAC Awesome	Con	CWSP	RLPSI (GPC restricted)	Agriculture and AgriFood Canada		94.58	83.76	6.12	12.38	94.58	83.76	6.12	12.38	94.58	83.76	6.12	12.38	94.58	83.76	6.12	12.38	94.58	83.76	6.12	12.38	Selected in all 5 weights	RLPSI (GPC restricted): Con & Org	Selected in all 5 weights (RLPSI (GPC restricted): Con & Org)
AAC Awesome	Org	CWSP	RLPSI (GPC restricted)	Agriculture and AgriFood Canada		91.62	79.85	6.5	11.72	91.62	79.85	6.5	11.72	91.62	79.85	6.5	11.72	91.62	79.85	6.5	11.72	91.62	79.85	6.5	11.72	Selected in all 5 weights	RLPSI (GPC restricted): Con & Org	Selected in all 5 weights (RLPSI (GPC restricted): Con & Org)
AAC Brandon	Con	CWRS	LPSI	Agriculture and AgriFood Canada	Yes (N=22)	91.03	78.13	5.24	15.72	91.03	78.13	5.24	15.72	91.03	78.13	5.24	15.72	91.03	78.13	5.24	15.72	91.03	78.13	5.24	15.72	Selected in all 5 weights	LPS (Con-Org); RLPSI (GPC restricted): Con & Org; RLPSI (Yld restricted): Con & Org	Selected in all 5 weights (LPS (Con-Org); RLPSI (GPC restricted): Con & Org; RLPSI (Yld restricted): Con & Org)
AAC Brandon	Con	CWRS	RLPSI (GPC restricted)	Agriculture and AgriFood Canada	Yes (N=22)	91.03	78.13	5.24	15.72	91.03	78.13	5.24	15.72	91.03	78.13	5.24	15.72	91.03	78.13	5.24	15.72	91.03	78.13	5.24	15.72	Selected in all 5 weights	LPS (Con-Org); RLPSI (GPC restricted): Con & Org; RLPSI (Yld restricted): Con & Org	Selected in all 5 weights (LPS (Con-Org); RLPSI (GPC restricted): Con & Org; RLPSI (Yld restricted): Con & Org)
AAC Brandon	Con	CWRS	RLPSI (Yld restricted)	Agriculture and AgriFood Canada	Yes (N=22)	91.03	78.13	5.24	15.72	91.03	78.13	5.24	15.72	91.03	78.13	5.24	15.72	91.03	78.13	5.24	15.72	91.03	78.13	5.24	15.72	Selected in all 5 weights	LPS (Con-Org); RLPSI (GPC restricted): Con & Org; RLPSI (Yld restricted): Con & Org	Selected in all 5 weights (LPS (Con-Org); RLPSI (GPC restricted): Con & Org; RLPSI (Yld restricted): Con & Org)
AAC Brandon	Org	CWRS	LPSI	Agriculture and AgriFood Canada	Yes (N=22)	88.69	79.6	5.38	15.49	88.69	79.6	5.38	15.49	88.69	79.6	5.38	15.49	88.69	79.6	5.38	15.49	88.69	79.6	5.38	15.49	Selected in all 5 weights	LPS (Con-Org); RLPSI (GPC restricted): Con & Org; RLPSI (Yld restricted): Con & Org	Selected in all 5 weights (LPS (Con-Org); RLPSI (GPC restricted): Con & Org; RLPSI (Yld restricted): Con & Org)	Best
AAC Brandon	Org	CWRS	RLPSI (GPC restricted)	Agriculture and AgriFood Canada	Yes (N=22)	88.69	79.6	5.38	15.49	88.69	79.6	5.38	15.49	88.69	79.6	5.38	15.49	88.69	79.6	5.38	15.49	88.69	79.6	5.38	15.49	Selected in all 5 weights	LPS (Con-Org); RLPSI (GPC restricted): Con & Org; RLPSI (Yld restricted): Con & Org	Selected in all 5 weights (LPS (Con-Org); RLPSI (GPC restricted): Con & Org; RLPSI (Yld restricted): Con & Org)	Best
AAC Brandon	Org	CWRS	RLPSI (Yld restricted)	Agriculture and AgriFood Canada	Yes (N=22)	88.69	79.6	5.38	15.49	88.69	79.6	5.38	15.49	88.69	79.6	5.38	15.49	88.69	79.6	5.38	15.49	88.69	79.6	5.38	15.49	Selected in all 5 weights	LPS (Con-Org); RLPSI (GPC restricted): Con & Org; RLPSI (Yld restricted): Con & Org	Selected in all 5 weights (LPS (Con-Org); RLPSI (GPC restricted): Con & Org; RLPSI (Yld restricted): Con & Org)	Best
AAC Castle	Con	CPSR	LPSI	Agriculture and AgriFood Canada	Yes (N=22)	93.38	74.63	4.97	16.63	93.38	74.63	4.97	16.63	93.38	74.63	4.97	16.63	93.38	74.63	4.97	16.63	93.38	74.63	4.97	16.63	Selected in all 5 weights	LPS (Con-Org); RLPSI (GPC restricted): Con & Org; RLPSI (Yld restricted): Con	Selected in all 5 weights (LPS (Con-Org); RLPSI (GPC restricted): Con & Org; RLPSI (Yld restricted): Con)
AAC Castle	Con	CPSR	RLPSI (GPC restricted)	Agriculture and AgriFood Canada	Yes (N=22)	93.38	74.63	4.97	16.63	93.38	74.63	4.97	16.63	93.38	74.63	4.97	16.63	93.38	74.63	4.97	16.63	93.38	74.63	4.97	16.63	Selected in all 5 weights	LPS (Con-Org); RLPSI (GPC restricted): Con & Org; RLPSI (Yld restricted): Con	Selected in all 5 weights (LPS (Con-Org); RLPSI (GPC restricted): Con & Org; RLPSI (Yld restricted): Con)
AAC Castle	Con	CPSR	RLPSI (Yld restricted)	Agriculture and AgriFood Canada	Yes (N=22)	93.38	74.63	4.97	16.63	93.38	74.63	4.97	16.63	93.38	74.63	4.97	16.63	93.38	74.63	4.97	16.63	93.38	74.63	4.97	16.63	Selected in all 5 weights	LPS (Con-Org); RLPSI (GPC restricted): Con & Org; RLPSI (Yld restricted): Con	Selected in all 5 weights (LPS (Con-Org); RLPSI (GPC restricted): Con & Org; RLPSI (Yld restricted): Con)
AAC Castle	Org	CPSR	LPSI	Agriculture and AgriFood Canada	Yes (N=22)									90.27	77.72	5.53	14.78									Selected in 1 weight	LPS (Con-Org); RLPSI (GPC restricted): Con & Org; RLPSI (Yld restricted): Con	Selected in 1 weight (LPS (Con-Org); RLPSI (GPC restricted): Con & Org; RLPSI (Yld restricted): Con)
AAC Castle	Org	CPSR	RLPSI (GPC restricted)	Agriculture and AgriFood Canada	Yes (N=22)	90.27	77.72	5.53	14.78	90.27	77.72	5.53	14.78	90.27	77.72	5.53	14.78	90.27	77.72	5.53	14.78	90.27	77.72	5.53	14.78	Selected in all 5 weights	LPS (Con-Org); RLPSI (GPC restricted): Con & Org; RLPSI (Yld restricted): Con	Selected in all 5 weights (LPS (Con-Org); RLPSI (GPC restricted): Con & Org; RLPSI (Yld restricted): Con)	Best
AAC Elie	Org	CWRS	RLPSI (GPC restricted)	Agriculture and AgriFood Canada		88.8	78.44	5.35	14.96	88.8	78.44	5.35	14.96	88.8	78.44	5.35	14.96	88.8	78.44	5.35	14.96	88.8	78.44	5.35	14.96	Selected in all 5 weights	RLPSI (GPC restricted): Org	Selected in all 5 weights (RLPSI (GPC restricted): Org)
AAC Foray	Org	CPSR	RLPSI (GPC restricted)	Agriculture and AgriFood Canada		88.5	83.02	5.72	14.11	88.5	83.02	5.72	14.11	88.5	83.02	5.72	14.11	88.5	83.02	5.72	14.11	88.5	83.02	5.72	14.11	Selected in all 5 weights	RLPSI (GPC restricted): Org	Selected in all 5 weights (RLPSI (GPC restricted): Org)
AAC Goodwin	Con	CPSR	LPSI	Agriculture and AgriFood Canada	Yes (N=22)	90.48	78.59	5.64	15.15	90.48	78.59	5.64	15.15	90.48	78.59	5.64	15.15	90.48	78.59	5.64	15.15	90.48	78.59	5.64	15.15	Selected in all 5 weights	LPS (Con-Org); RLPSI (GPC restricted): Con & Org; RLPSI (Yld restricted): Con & Org	Selected in all 5 weights (LPS (Con-Org); RLPSI (GPC restricted): Con & Org; RLPSI (Yld restricted): Con & Org)
AAC Goodwin	Con	CPSR	RLPSI (GPC restricted)	Agriculture and AgriFood Canada	Yes (N=22)	90.48	78.59	5.64	15.15	90.48	78.59	5.64	15.15	90.48	78.59	5.64	15.15	90.48	78.59	5.64	15.15	90.48	78.59	5.64	15.15	Selected in all 5 weights	LPS (Con-Org); RLPSI (GPC restricted): Con & Org; RLPSI (Yld restricted): Con & Org	Selected in all 5 weights (LPS (Con-Org); RLPSI (GPC restricted): Con & Org; RLPSI (Yld restricted): Con & Org)
AAC Goodwin	Con	CPSR	RLPSI (Yld restricted)	Agriculture and AgriFood Canada	Yes (N=22)	90.48	78.59	5.64	15.15	90.48	78.59	5.64	15.15	90.48	78.59	5.64	15.15	90.48	78.59	5.64	15.15	90.48	78.59	5.64	15.15	Selected in all 5 weights	LPS (Con-Org); RLPSI (GPC restricted): Con & Org; RLPSI (Yld restricted): Con & Org	Selected in all 5 weights (LPS (Con-Org); RLPSI (GPC restricted): Con & Org; RLPSI (Yld restricted): Con & Org)
AAC Goodwin	Org	CPSR	LPSI	Agriculture and AgriFood Canada	Yes (N=22)	89	82.51	6	14.63	89	82.51	6	14.63	89	82.51	6	14.63	89	82.51	6	14.63	89	82.51	6	14.63	Selected in all 5 weights	LPS (Con-Org); RLPSI (GPC restricted): Con & Org; RLPSI (Yld restricted): Con & Org	Selected in all 5 weights (LPS (Con-Org); RLPSI (GPC restricted): Con & Org; RLPSI (Yld restricted): Con & Org)	Best
AAC Goodwin	Org	CPSR	RLPSI (GPC restricted)	Agriculture and AgriFood Canada	Yes (N=22)	89	82.51	6	14.63	89	82.51	6	14.63	89	82.51	6	14.63	89	82.51	6	14.63	89	82.51	6	14.63	Selected in all 5 weights	LPS (Con-Org); RLPSI (GPC restricted): Con & Org; RLPSI (Yld restricted): Con & Org	Selected in all 5 weights (LPS (Con-Org); RLPSI (GPC restricted): Con & Org; RLPSI (Yld restricted): Con & Org)	Best
AAC Goodwin	Org	CPSR	RLPSI (Yld restricted)	Agriculture and AgriFood Canada	Yes (N=22)	89	82.51	6	14.63	89	82.51	6	14.63	89	82.51	6	14.63	89	82.51	6	14.63	89	82.51	6	14.63	Selected in all 5 weights	LPS (Con-Org); RLPSI (GPC restricted): Con & Org; RLPSI (Yld restricted): Con & Org	Selected in all 5 weights (LPS (Con-Org); RLPSI (GPC restricted): Con & Org; RLPSI (Yld restricted): Con & Org)	Best
AAC Penhold	Con	CPSR	LPSI	Agriculture and AgriFood Canada	Yes (N=22)					91.39	72.43	5.2	15.33	91.39	72.43	5.2	15.33					91.39	72.43	5.2	15.33	Selected in 3 weights	LPS (Con-Org); RLPSI (GPC restricted): Con & Org	Selected in 3 weights (LPS (Con-Org); RLPSI (GPC restricted): Con & Org)
AAC Penhold	Con	CPSR	RLPSI (GPC restricted)	Agriculture and AgriFood Canada	Yes (N=22)	91.39	72.43	5.2	15.33	91.39	72.43	5.2	15.33	91.39	72.43	5.2	15.33	91.39	72.43	5.2	15.33	91.39	72.43	5.2	15.33	Selected in all 5 weights	LPS (Con-Org); RLPSI (GPC restricted): Con & Org	Selected in all 5 weights (LPS (Con-Org); RLPSI (GPC restricted): Con & Org)
AAC Penhold	Org	CPSR	LPSI	Agriculture and AgriFood Canada	Yes (N=22)									88.48	73.71	5.23	15.15									Selected in 1 weight	LPS (Con-Org); RLPSI (GPC restricted): Con & Org	Selected in 1 weight (LPS (Con-Org); RLPSI (GPC restricted): Con & Org)
AAC Penhold	Org	CPSR	RLPSI (GPC restricted)	Agriculture and AgriFood Canada	Yes (N=22)	88.48	73.71	5.23	15.15	88.48	73.71	5.23	15.15	88.48	73.71	5.23	15.15	88.48	73.71	5.23	15.15	88.48	73.71	5.23	15.15	Selected in all 5 weights	LPS (Con-Org); RLPSI (GPC restricted): Con & Org	Selected in all 5 weights (LPS (Con-Org); RLPSI (GPC restricted): Con & Org)	Best
AAC Redberry	Con	CWRS	LPSI	Agriculture and AgriFood Canada		86.64	81.14	4.97	16.1	86.64	81.14	4.97	16.1	86.64	81.14	4.97	16.1	86.64	81.14	4.97	16.1	86.64	81.14	4.97	16.1	Selected in all 5 weights	LPS (Con), RLPSI (GPC restricted) Con, and RLPSI (Yld restricted) Con	Selected in all 5 weights (LPS (Con), RLPSI (GPC restricted) Con, and RLPSI (Yld restricted) Con)
AAC Redberry	Con	CWRS	RLPSI (GPC restricted)	Agriculture and AgriFood Canada		86.64	81.14	4.97	16.1	86.64	81.14	4.97	16.1	86.64	81.14	4.97	16.1	86.64	81.14	4.97	16.1	86.64	81.14	4.97	16.1	Selected in all 5 weights	LPS (Con), RLPSI (GPC restricted) Con, and RLPSI (Yld restricted) Con	Selected in all 5 weights (LPS (Con), RLPSI (GPC restricted) Con, and RLPSI (Yld restricted) Con)
AAC Redberry	Con	CWRS	RLPSI (Yld restricted)	Agriculture and AgriFood Canada		86.64	81.14	4.97	16.1	86.64	81.14	4.97	16.1	86.64	81.14	4.97	16.1	86.64	81.14	4.97	16.1	86.64	81.14	4.97	16.1	Selected in all 5 weights	LPS (Con), RLPSI (GPC restricted) Con, and RLPSI (Yld restricted) Con	Selected in all 5 weights (LPS (Con), RLPSI (GPC restricted) Con, and RLPSI (Yld restricted) Con)
AAC Tisdale	Con	CWRS	LPSI	Agriculture and AgriFood Canada	Yes (N=22)	87.85	79.98	4.62	16.43	87.85	79.98	4.62	16.43					87.85	79.98	4.62	16.43	87.85	79.98	4.62	16.43	Selected in 4 weights	LPS (Con-Org) plus RLPSI (Yld restricted): Con & Org	Selected in 4 weights (LPS (Con-Org) plus RLPSI (Yld restricted): Con & Org)
AAC Tisdale	Con	CWRS	RLPSI (Yld restricted)	Agriculture and AgriFood Canada	Yes (N=22)	87.85	79.98	4.62	16.43	87.85	79.98	4.62	16.43	87.85	79.98	4.62	16.43	87.85	79.98	4.62	16.43	87.85	79.98	4.62	16.43	Selected in all 5 weights	LPS (Con-Org) plus RLPSI (Yld restricted): Con & Org	Selected in all 5 weights (LPS (Con-Org) plus RLPSI (Yld restricted): Con & Org)
AAC Tisdale	Org	CWRS	LPSI	Agriculture and AgriFood Canada	Yes (N=22)	85.01	84.15	5.02	15.68	85.01	84.15	5.02	15.68					85.01	84.15	5.02	15.68	85.01	84.15	5.02	15.68	Selected in 4 weights	LPS (Con-Org) plus RLPSI (Yld restricted): Con & Org	Selected in 4 weights (LPS (Con-Org) plus RLPSI (Yld restricted): Con & Org)
AAC Tisdale	Org	CWRS	RLPSI (Yld restricted)	Agriculture and AgriFood Canada	Yes (N=22)	85.01	84.15	5.02	15.68	85.01	84.15	5.02	15.68	85.01	84.15	5.02	15.68	85.01	84.15	5.02	15.68	85.01	84.15	5.02	15.68	Selected in all 5 weights	LPS (Con-Org) plus RLPSI (Yld restricted): Con & Org	Selected in all 5 weights (LPS (Con-Org) plus RLPSI (Yld restricted): Con & Org)	Best
AAC Viewfield	Con	CWRS	RLPSI (GPC restricted)	Agriculture and AgriFood Canada	Yes (N=22)	90.06	74.07	5.05	15.44	90.06	74.07	5.05	15.44	90.06	74.07	5.05	15.44	90.06	74.07	5.05	15.44	90.06	74.07	5.05	15.44	Selected in all 5 weights	LPS (Org); RLPSI (GPC restricted): Con & Org; RLPSI (Yld restricted): Org	Selected in all 5 weights (LPS (Org); RLPSI (GPC restricted): Con & Org; RLPSI (Yld restricted): Org)
AAC Viewfield	Org	CWRS	LPSI	Agriculture and AgriFood Canada	Yes (N=22)	88.16	73.59	5.57	14.79	88.16	73.59	5.57	14.79	88.16	73.59	5.57	14.79	88.16	73.59	5.57	14.79	88.16	73.59	5.57	14.79	Selected in all 5 weights	LPS (Org); RLPSI (GPC restricted): Con & Org; RLPSI (Yld restricted): Org	Selected in all 5 weights (LPS (Org); RLPSI (GPC restricted): Con & Org; RLPSI (Yld restricted): Org)	2nd best
AAC Viewfield	Org	CWRS	RLPSI (GPC restricted)	Agriculture and AgriFood Canada	Yes (N=22)	88.16	73.59	5.57	14.79	88.16	73.59	5.57	14.79	88.16	73.59	5.57	14.79	88.16	73.59	5.57	14.79	88.16	73.59	5.57	14.79	Selected in all 5 weights	LPS (Org); RLPSI (GPC restricted): Con & Org; RLPSI (Yld restricted): Org	Selected in all 5 weights (LPS (Org); RLPSI (GPC restricted): Con & Org; RLPSI (Yld restricted): Org)	2nd best
AAC Viewfield	Org	CWRS	RLPSI (Yld restricted)	Agriculture and AgriFood Canada	Yes (N=22)	88.16	73.59	5.57	14.79	88.16	73.59	5.57	14.79	88.16	73.59	5.57	14.79	88.16	73.59	5.57	14.79	88.16	73.59	5.57	14.79	Selected in all 5 weights	LPS (Org); RLPSI (GPC restricted): Con & Org; RLPSI (Yld restricted): Org	Selected in all 5 weights (LPS (Org); RLPSI (GPC restricted): Con & Org; RLPSI (Yld restricted): Org)	2nd best
AC Cadillac	Con	CWRS	LPSI	Farm Pure Seeds (ex SW Seed Canada Ltd)	Yes (N=22)	86.84	89.35	4.48	16.86	86.84	89.35	4.48	16.86					86.84	89.35	4.48	16.86	86.84	89.35	4.48	16.86	Selected in 4 weights	LPS (Con-Org) plus RLPSI (Yld restricted): Con & Org	Selected in 4 weights (LPS (Con-Org) plus RLPSI (Yld restricted): Con & Org)
AC Cadillac	Con	CWRS	RLPSI (Yld restricted)	Farm Pure Seeds (ex SW Seed Canada Ltd)	Yes (N=22)	86.84	89.35	4.48	16.86	86.84	89.35	4.48	16.86	86.84	89.35	4.48	16.86	86.84	89.35	4.48	16.86	86.84	89.35	4.48	16.86	Selected in all 5 weights	LPS (Con-Org) plus RLPSI (Yld restricted): Con & Org	Selected in all 5 weights (LPS (Con-Org) plus RLPSI (Yld restricted): Con & Org)
AC Cadillac	Org	CWRS	LPSI	Farm Pure Seeds (ex SW Seed Canada Ltd)	Yes (N=22)	85.23	100.07	4.97	16.52	85.23	100.07	4.97	16.52	85.23	100.07	4.97	16.52	85.23	100.07	4.97	16.52	85.23	100.07	4.97	16.52	Selected in all 5 weights	LPS (Con-Org) plus RLPSI (Yld restricted): Con & Org	Selected in all 5 weights (LPS (Con-Org) plus RLPSI (Yld restricted): Con & Org)	Best
AC Cadillac	Org	CWRS	RLPSI (Yld restricted)	Farm Pure Seeds (ex SW Seed Canada Ltd)	Yes (N=22)	85.23	100.07	4.97	16.52	85.23	100.07	4.97	16.52	85.23	100.07	4.97	16.52	85.23	100.07	4.97	16.52	85.23	100.07	4.97	16.52	Selected in all 5 weights	LPS (Con-Org) plus RLPSI (Yld restricted): Con & Org	Selected in all 5 weights (LPS (Con-Org) plus RLPSI (Yld restricted): Con & Org)	Best
Burnside	Con	CWES	LPSI	Agriculture and AgriFood Canada		90.4	94.84	4.87	16.6	90.4	94.84	4.87	16.6	90.4	94.84	4.87	16.6	90.4	94.84	4.87	16.6	90.4	94.84	4.87	16.6	Selected in all 5 weights	LPS (Con) plus RLPSI (Yld restricted): Con	Selected in all 5 weights (LPS (Con) plus RLPSI (Yld restricted): Con)
Burnside	Con	CWES	RLPSI (Yld restricted)	Agriculture and AgriFood Canada		90.4	94.84	4.87	16.6	90.4	94.84	4.87	16.6	90.4	94.84	4.87	16.6	90.4	94.84	4.87	16.6	90.4	94.84	4.87	16.6	Selected in all 5 weights	LPS (Con) plus RLPSI (Yld restricted): Con	Selected in all 5 weights (LPS (Con) plus RLPSI (Yld restricted): Con)
BW5020	Con	CWRS	RLPSI (GPC restricted)	University of Alberta		94.04	71.95	5.28	14.63	94.04	71.95	5.28	14.63	94.04	71.95	5.28	14.63	94.04	71.95	5.28	14.63	94.04	71.95	5.28	14.63	Selected in all 5 weights	RLPSI (GPC restricted): Con	Selected in all 5 weights (RLPSI (GPC restricted): Con)
BYT14-19	Con	CWRS	LPSI	University of Alberta	Yes (N=22)	88.14	85.38	4.26	17.24	88.14	85.38	4.26	17.24	88.14	85.38	4.26	17.24	88.14	85.38	4.26	17.24	88.14	85.38	4.26	17.24	Selected in all 5 weights	LPS (Con-Org) plus RLPSI (Yld restricted): Con & Org	Selected in all 5 weights (LPS (Con-Org) plus RLPSI (Yld restricted): Con & Org)
BYT14-19	Con	CWRS	RLPSI (Yld restricted)	University of Alberta	Yes (N=22)	88.14	85.38	4.26	17.24	88.14	85.38	4.26	17.24	88.14	85.38	4.26	17.24	88.14	85.38	4.26	17.24	88.14	85.38	4.26	17.24	Selected in all 5 weights	LPS (Con-Org) plus RLPSI (Yld restricted): Con & Org	Selected in all 5 weights (LPS (Con-Org) plus RLPSI (Yld restricted): Con & Org)
BYT14-19	Org	CWRS	LPSI	University of Alberta	Yes (N=22)	84.85	89.89	4.47	16.62	84.85	89.89	4.47	16.62					84.85	89.89	4.47	16.62					Selected in 3 weights	LPS (Con-Org) plus RLPSI (Yld restricted): Con & Org	Selected in 3 weights (LPS (Con-Org) plus RLPSI (Yld restricted): Con & Org)
BYT14-19	Org	CWRS	RLPSI (Yld restricted)	University of Alberta	Yes (N=22)	84.85	89.89	4.47	16.62	84.85	89.89	4.47	16.62	84.85	89.89	4.47	16.62	84.85	89.89	4.47	16.62	84.85	89.89	4.47	16.62	Selected in all 5 weights	LPS (Con-Org) plus RLPSI (Yld restricted): Con & Org	Selected in all 5 weights (LPS (Con-Org) plus RLPSI (Yld restricted): Con & Org)	Best
CDC Alsask	Org	CWRS	LPSI	University of Saskatchewan	Yes (N=22)	85.34	96.91	5.21	15.94	85.34	96.91	5.21	15.94	85.34	96.91	5.21	15.94	85.34	96.91	5.21	15.94	85.34	96.91	5.21	15.94	Selected in all 5 weights	LPS (Con) plus RLPSI (Yld restricted): Org	Selected in all 5 weights (LPS (Con) plus RLPSI (Yld restricted): Org)
CDC Alsask	Org	CWRS	RLPSI (Yld restricted)	University of Saskatchewan	Yes (N=22)	85.34	96.91	5.21	15.94	85.34	96.91	5.21	15.94	85.34	96.91	5.21	15.94	85.34	96.91	5.21	15.94	85.34	96.91	5.21	15.94	Selected in all 5 weights	LPS (Con) plus RLPSI (Yld restricted): Org	Selected in all 5 weights (LPS (Con) plus RLPSI (Yld restricted): Org)
CDC Bounty	Org	CWRS	LPSI	University of Saskatchewan	Yes (N=22)	85.92	99.71	5.04	16.07	85.92	99.71	5.04	16.07	85.92	99.71	5.04	16.07	85.92	99.71	5.04	16.07	85.92	99.71	5.04	16.07	Selected in all 5 weights	LPS (Con) plus RLPSI (Yld restricted): Org	Selected in all 5 weights (LPS (Con) plus RLPSI (Yld restricted): Org)
CDC Bounty	Org	CWRS	RLPSI (Yld restricted)	University of Saskatchewan	Yes (N=22)	85.92	99.71	5.04	16.07	85.92	99.71	5.04	16.07	85.92	99.71	5.04	16.07	85.92	99.71	5.04	16.07	85.92	99.71	5.04	16.07	Selected in all 5 weights	LPS (Con) plus RLPSI (Yld restricted): Org	Selected in all 5 weights (LPS (Con) plus RLPSI (Yld restricted): Org)
CDC Cordon CLPlus	Org	CNHR	RLPSI (GPC restricted)	University of Saskatchewan		86.38	78.97	5.74	14.13	86.38	78.97	5.74	14.13	86.38	78.97	5.74	14.13	86.38	78.97	5.74	14.13	86.38	78.97	5.74	14.13	Selected in all 5 weights	RLPSI (GPC restricted): Org	Selected in all 5 weights (RLPSI (GPC restricted): Org)
CDC Hughes	Con	CWRS	LPSI	University of Saskatchewan		87.28	79.08	5.07	16.11	87.28	79.08	5.07	16.11	87.28	79.08	5.07	16.11	87.28	79.08	5.07	16.11	87.28	79.08	5.07	16.11	Selected in all 5 weights	LPS (Con-Org); RLPSI (GPC restricted): Con & Org; RLPSI (Yld restricted): Con	Selected in all 5 weights (LPS (Con-Org); RLPSI (GPC restricted): Con & Org; RLPSI (Yld restricted): Con)
CDC Hughes	Con	CWRS	RLPSI (GPC restricted)	University of Saskatchewan		87.28	79.08	5.07	16.11	87.28	79.08	5.07	16.11	87.28	79.08	5.07	16.11	87.28	79.08	5.07	16.11	87.28	79.08	5.07	16.11	Selected in all 5 weights	LPS (Con-Org); RLPSI (GPC restricted): Con & Org; RLPSI (Yld restricted): Con	Selected in all 5 weights (LPS (Con-Org); RLPSI (GPC restricted): Con & Org; RLPSI (Yld restricted): Con)
CDC Hughes	Con	CWRS	RLPSI (Yld restricted)	University of Saskatchewan		87.28	79.08	5.07	16.11	87.28	79.08	5.07	16.11	87.28	79.08	5.07	16.11	87.28	79.08	5.07	16.11	87.28	79.08	5.07	16.11	Selected in all 5 weights	LPS (Con-Org); RLPSI (GPC restricted): Con & Org; RLPSI (Yld restricted): Con	Selected in all 5 weights (LPS (Con-Org); RLPSI (GPC restricted): Con & Org; RLPSI (Yld restricted): Con)
CDC Hughes	Org	CWRS	LPSI	University of Saskatchewan										86.28	79.27	5.2	15.28					86.28	79.27	5.2	15.28	Selected in 2 weights	LPS (Con-Org); RLPSI (GPC restricted): Con & Org; RLPSI (Yld restricted): Con	Selected in 2 weights (LPS (Con-Org); RLPSI (GPC restricted): Con & Org; RLPSI (Yld restricted): Con)
CDC Hughes	Org	CWRS	RLPSI (GPC restricted)	University of Saskatchewan		86.28	79.27	5.2	15.28	86.28	79.27	5.2	15.28					86.28	79.27	5.2	15.28	86.28	79.27	5.2	15.28	Selected in 4 weights	LPS (Con-Org); RLPSI (GPC restricted): Con & Org; RLPSI (Yld restricted): Con	Selected in 4 weights (LPS (Con-Org); RLPSI (GPC restricted): Con & Org; RLPSI (Yld restricted): Con)
CDC Imagine	Org	CWRS	LPSI	University of Saskatchewan	Yes (N=22)	86.4	89.16	5.33	15.92	86.4	89.16	5.33	15.92	86.4	89.16	5.33	15.92	86.4	89.16	5.33	15.92	86.4	89.16	5.33	15.92	Selected in all 5 weights	LPS (Org); RLPSI (GPC restricted): Org; RLPSI (Yld restricted): Org	Selected in all 5 weights (LPS (Org); RLPSI (GPC restricted): Org; RLPSI (Yld restricted): Org)	2nd best
CDC Imagine	Org	CWRS	RLPSI (GPC restricted)	University of Saskatchewan	Yes (N=22)	86.4	89.16	5.33	15.92	86.4	89.16	5.33	15.92	86.4	89.16	5.33	15.92	86.4	89.16	5.33	15.92	86.4	89.16	5.33	15.92	Selected in all 5 weights	LPS (Org); RLPSI (GPC restricted): Org; RLPSI (Yld restricted): Org	Selected in all 5 weights (LPS (Org); RLPSI (GPC restricted): Org; RLPSI (Yld restricted): Org)	2nd best
CDC Imagine	Org	CWRS	RLPSI (Yld restricted)	University of Saskatchewan	Yes (N=22)	86.4	89.16	5.33	15.92	86.4	89.16	5.33	15.92	86.4	89.16	5.33	15.92	86.4	89.16	5.33	15.92	86.4	89.16	5.33	15.92	Selected in all 5 weights	LPS (Org); RLPSI (GPC restricted): Org; RLPSI (Yld restricted): Org	Selected in all 5 weights (LPS (Org); RLPSI (GPC restricted): Org; RLPSI (Yld restricted): Org)	2nd best
CDC Landmark	Con	CWRS	LPSI	University of Saskatchewan		87.66	81.42	4.94	16.33	87.66	81.42	4.94	16.33	87.66	81.42	4.94	16.33	87.66	81.42	4.94	16.33	87.66	81.42	4.94	16.33	Selected in all 5 weights	LPS (Con), RLPSI (GPC restricted) Con, and RLPSI (Yld restricted) Con	Selected in all 5 weights (LPS (Con), RLPSI (GPC restricted) Con, and RLPSI (Yld restricted) Con)
CDC Landmark	Con	CWRS	RLPSI (GPC restricted)	University of Saskatchewan		87.66	81.42	4.94	16.33	87.66	81.42	4.94	16.33	87.66	81.42	4.94	16.33	87.66	81.42	4.94	16.33	87.66	81.42	4.94	16.33	Selected in all 5 weights	LPS (Con), RLPSI (GPC restricted) Con, and RLPSI (Yld restricted) Con	Selected in all 5 weights (LPS (Con), RLPSI (GPC restricted) Con, and RLPSI (Yld restricted) Con)
CDC Landmark	Con	CWRS	RLPSI (Yld restricted)	University of Saskatchewan		87.66	81.42	4.94	16.33	87.66	81.42	4.94	16.33	87.66	81.42	4.94	16.33	87.66	81.42	4.94	16.33	87.66	81.42	4.94	16.33	Selected in all 5 weights	LPS (Con), RLPSI (GPC restricted) Con, and RLPSI (Yld restricted) Con	Selected in all 5 weights (LPS (Con), RLPSI (GPC restricted) Con, and RLPSI (Yld restricted) Con)
CDC Thrive	Org	CWRS	LPSI	University of Saskatchewan	Yes (N=22)	86.47	93.47	5.24	15.79	86.47	93.47	5.24	15.79	86.47	93.47	5.24	15.79	86.47	93.47	5.24	15.79	86.47	93.47	5.24	15.79	Selected in all 5 weights	LPS (Con) plus RLPSI (Yld restricted): Org	Selected in all 5 weights (LPS (Con) plus RLPSI (Yld restricted): Org)
CDC Thrive	Org	CWRS	RLPSI (Yld restricted)	University of Saskatchewan	Yes (N=22)	86.47	93.47	5.24	15.79	86.47	93.47	5.24	15.79	86.47	93.47	5.24	15.79	86.47	93.47	5.24	15.79	86.47	93.47	5.24	15.79	Selected in all 5 weights	LPS (Con) plus RLPSI (Yld restricted): Org	Selected in all 5 weights (LPS (Con) plus RLPSI (Yld restricted): Org)
CDC Throttle	Con	CWSP	RLPSI (GPC restricted)	University of Saskatchewan		92.99	82.06	5.85	13.97	92.99	82.06	5.85	13.97	92.99	82.06	5.85	13.97	92.99	82.06	5.85	13.97	92.99	82.06	5.85	13.97	Selected in all 5 weights	RLPSI (GPC restricted): Con & Org	Selected in all 5 weights (RLPSI (GPC restricted): Con & Org)
CDC Throttle	Org	CWSP	RLPSI (GPC restricted)	University of Saskatchewan		91.82	83.07	6.41	13.08	91.82	83.07	6.41	13.08	91.82	83.07	6.41	13.08	91.82	83.07	6.41	13.08	91.82	83.07	6.41	13.08	Selected in all 5 weights	RLPSI (GPC restricted): Con & Org	Selected in all 5 weights (RLPSI (GPC restricted): Con & Org)
CDC VR Morris	Con	CWRS	LPSI	University of Saskatchewan	Yes (N=22)	89.62	78.83	4.4	17.37	89.62	78.83	4.4	17.37	89.62	78.83	4.4	17.37	89.62	78.83	4.4	17.37	89.62	78.83	4.4	17.37	Selected in all 5 weights	LPS (Con-Org) plus RLPSI (Yld restricted): Con & Org	Selected in all 5 weights (LPS (Con-Org) plus RLPSI (Yld restricted): Con & Org)
CDC VR Morris	Con	CWRS	RLPSI (Yld restricted)	University of Saskatchewan	Yes (N=22)	89.62	78.83	4.4	17.37	89.62	78.83	4.4	17.37	89.62	78.83	4.4	17.37	89.62	78.83	4.4	17.37	89.62	78.83	4.4	17.37	Selected in all 5 weights	LPS (Con-Org) plus RLPSI (Yld restricted): Con & Org	Selected in all 5 weights (LPS (Con-Org) plus RLPSI (Yld restricted): Con & Org)
CDC VR Morris	Org	CWRS	LPSI	University of Saskatchewan	Yes (N=22)	87.78	86.05	4.57	16.98	87.78	86.05	4.57	16.98	87.78	86.05	4.57	16.98	87.78	86.05	4.57	16.98	87.78	86.05	4.57	16.98	Selected in all 5 weights	LPS (Con-Org) plus RLPSI (Yld restricted): Con & Org	Selected in all 5 weights (LPS (Con-Org) plus RLPSI (Yld restricted): Con & Org)	Best
CDC VR Morris	Org	CWRS	RLPSI (Yld restricted)	University of Saskatchewan	Yes (N=22)	87.78	86.05	4.57	16.98	87.78	86.05	4.57	16.98	87.78	86.05	4.57	16.98	87.78	86.05	4.57	16.98	87.78	86.05	4.57	16.98	Selected in all 5 weights	LPS (Con-Org) plus RLPSI (Yld restricted): Con & Org	Selected in all 5 weights (LPS (Con-Org) plus RLPSI (Yld restricted): Con & Org)	Best
CDN Bison	Con	CWES	LPSI	Agriculture and AgriFood Canada										94.03	85.01	5.25	15.44									Selected in 1 weight	LPS (Con), RLPSI (GPC restricted) Con	Selected in 1 weight (LPS (Con), RLPSI (GPC restricted) Con)
CDN Bison	Con	CWES	RLPSI (GPC restricted)	Agriculture and AgriFood Canada		94.03	85.01	5.25	15.44	94.03	85.01	5.25	15.44	94.03	85.01	5.25	15.44					94.03	85.01	5.25	15.44	Selected in 4 weights	LPS (Con), RLPSI (GPC restricted) Con	Selected in 4 weights (LPS (Con), RLPSI (GPC restricted) Con)
Conquer	Con	CNHR	LPSI	Agriculture and AgriFood Canada	Yes (N=22)	91.71	84.45	5.16	16.36	91.71	84.45	5.16	16.36	91.71	84.45	5.16	16.36	91.71	84.45	5.16	16.36	91.71	84.45	5.16	16.36	Selected in all 5 weights	LPS (Con-Org); RLPSI (GPC restricted): Con & Org; RLPSI (Yld restricted): Con & Org	Selected in all 5 weights (LPS (Con-Org); RLPSI (GPC restricted): Con & Org; RLPSI (Yld restricted): Con & Org)
Conquer	Con	CNHR	RLPSI (GPC restricted)	Agriculture and AgriFood Canada	Yes (N=22)	91.71	84.45	5.16	16.36	91.71	84.45	5.16	16.36	91.71	84.45	5.16	16.36	91.71	84.45	5.16	16.36	91.71	84.45	5.16	16.36	Selected in all 5 weights	LPS (Con-Org); RLPSI (GPC restricted): Con & Org; RLPSI (Yld restricted): Con & Org	Selected in all 5 weights (LPS (Con-Org); RLPSI (GPC restricted): Con & Org; RLPSI (Yld restricted): Con & Org)
Conquer	Con	CNHR	RLPSI (Yld restricted)	Agriculture and AgriFood Canada	Yes (N=22)	91.71	84.45	5.16	16.36	91.71	84.45	5.16	16.36	91.71	84.45	5.16	16.36	91.71	84.45	5.16	16.36	91.71	84.45	5.16	16.36	Selected in all 5 weights	LPS (Con-Org); RLPSI (GPC restricted): Con & Org; RLPSI (Yld restricted): Con & Org	Selected in all 5 weights (LPS (Con-Org); RLPSI (GPC restricted): Con & Org; RLPSI (Yld restricted): Con & Org)
Conquer	Org	CNHR	LPSI	Agriculture and AgriFood Canada	Yes (N=22)	89.92	91.43	6.17	14.7	89.92	91.43	6.17	14.7	89.92	91.43	6.17	14.7	89.92	91.43	6.17	14.7	89.92	91.43	6.17	14.7	Selected in all 5 weights	LPS (Con-Org); RLPSI (GPC restricted): Con & Org; RLPSI (Yld restricted): Con & Org	Selected in all 5 weights (LPS (Con-Org); RLPSI (GPC restricted): Con & Org; RLPSI (Yld restricted): Con & Org)	Best
Conquer	Org	CNHR	RLPSI (GPC restricted)	Agriculture and AgriFood Canada	Yes (N=22)	89.92	91.43	6.17	14.7	89.92	91.43	6.17	14.7	89.92	91.43	6.17	14.7	89.92	91.43	6.17	14.7	89.92	91.43	6.17	14.7	Selected in all 5 weights	LPS (Con-Org); RLPSI (GPC restricted): Con & Org; RLPSI (Yld restricted): Con & Org	Selected in all 5 weights (LPS (Con-Org); RLPSI (GPC restricted): Con & Org; RLPSI (Yld restricted): Con & Org)	Best
Conquer	Org	CNHR	RLPSI (Yld restricted)	Agriculture and AgriFood Canada	Yes (N=22)	89.92	91.43	6.17	14.7	89.92	91.43	6.17	14.7	89.92	91.43	6.17	14.7	89.92	91.43	6.17	14.7	89.92	91.43	6.17	14.7	Selected in all 5 weights	LPS (Con-Org); RLPSI (GPC restricted): Con & Org; RLPSI (Yld restricted): Con & Org	Selected in all 5 weights (LPS (Con-Org); RLPSI (GPC restricted): Con & Org; RLPSI (Yld restricted): Con & Org)	Best
Faller	Con	CNHR	RLPSI (GPC restricted)	Seed Depot Corp.		90.58	80.8	5.49	14.23	90.58	80.8	5.49	14.23	90.58	80.8	5.49	14.23	90.58	80.8	5.49	14.23	90.58	80.8	5.49	14.23	Selected in all 5 weights	RLPSI (GPC restricted): Con & Org	Selected in all 5 weights (RLPSI (GPC restricted): Con & Org)
Faller	Org	CNHR	RLPSI (GPC restricted)	Seed Depot Corp.		88.63	82.56	6.02	13.47	88.63	82.56	6.02	13.47	88.63	82.56	6.02	13.47	88.63	82.56	6.02	13.47	88.63	82.56	6.02	13.47	Selected in all 5 weights	RLPSI (GPC restricted): Con & Org	Selected in all 5 weights (RLPSI (GPC restricted): Con & Org)
Glencross	Con	CWES	LPSI	Agriculture and AgriFood Canada														85.94	91.73	4.72	16.39	85.94	91.73	4.72	16.39	Selected in 2 weights	LPS (Con) plus RLPSI (Yld restricted): Con	Selected in 2 weights (LPS (Con) plus RLPSI (Yld restricted): Con)
Glencross	Con	CWES	RLPSI (Yld restricted)	Agriculture and AgriFood Canada														85.94	91.73	4.72	16.39	85.94	91.73	4.72	16.39	Selected in 2 weights	LPS (Con) plus RLPSI (Yld restricted): Con	Selected in 2 weights (LPS (Con) plus RLPSI (Yld restricted): Con)
Goodeve	Org	CWRS	LPSI	Agriculture and AgriFood Canada	Yes (N=22)	85.01	88.85	5.11	15.9	85.01	88.85	5.11	15.9	85.01	88.85	5.11	15.9	85.01	88.85	5.11	15.9	85.01	88.85	5.11	15.9	Selected in all 5 weights	LPS (Con) plus RLPSI (Yld restricted): Org	Selected in all 5 weights (LPS (Con) plus RLPSI (Yld restricted): Org)
Goodeve	Org	CWRS	RLPSI (Yld restricted)	Agriculture and AgriFood Canada	Yes (N=22)	85.01	88.85	5.11	15.9	85.01	88.85	5.11	15.9	85.01	88.85	5.11	15.9	85.01	88.85	5.11	15.9	85.01	88.85	5.11	15.9	Selected in all 5 weights	LPS (Con) plus RLPSI (Yld restricted): Org	Selected in all 5 weights (LPS (Con) plus RLPSI (Yld restricted): Org)
Jake	Con	CWRS	LPSI	University of Alberta		85.45	80.7	4.51	16.98	85.45	80.7	4.51	16.98	85.45	80.7	4.51	16.98	85.45	80.7	4.51	16.98	85.45	80.7	4.51	16.98	Selected in all 5 weights	LPS (Con) plus RLPSI (Yld restricted): Con	Selected in all 5 weights (LPS (Con) plus RLPSI (Yld restricted): Con)
Jake	Con	CWRS	RLPSI (Yld restricted)	University of Alberta		85.45	80.7	4.51	16.98	85.45	80.7	4.51	16.98	85.45	80.7	4.51	16.98	85.45	80.7	4.51	16.98	85.45	80.7	4.51	16.98	Selected in all 5 weights	LPS (Con) plus RLPSI (Yld restricted): Con	Selected in all 5 weights (LPS (Con) plus RLPSI (Yld restricted): Con)
Lillian	Org	CNHR	LPSI	Secan Association	Yes (N=22)	85.25	88.64	5.07	16.18	85.25	88.64	5.07	16.18	85.25	88.64	5.07	16.18	85.25	88.64	5.07	16.18	85.25	88.64	5.07	16.18	Selected in all 5 weights	LPS (Org); RLPSI (GPC restricted): Org; RLPSI (Yld restricted): Org	Selected in all 5 weights (LPS (Org); RLPSI (GPC restricted): Org; RLPSI (Yld restricted): Org)	2nd best
Lillian	Org	CNHR	RLPSI (GPC restricted)	Secan Association	Yes (N=22)									85.25	88.64	5.07	16.18	85.25	88.64	5.07	16.18	85.25	88.64	5.07	16.18	Selected in 3 weights	LPS (Org); RLPSI (GPC restricted): Org; RLPSI (Yld restricted): Org	Selected in 3 weights (LPS (Org); RLPSI (GPC restricted): Org; RLPSI (Yld restricted): Org)
Lillian	Org	CNHR	RLPSI (Yld restricted)	Secan Association	Yes (N=22)	85.25	88.64	5.07	16.18	85.25	88.64	5.07	16.18	85.25	88.64	5.07	16.18	85.25	88.64	5.07	16.18	85.25	88.64	5.07	16.18	Selected in all 5 weights	LPS (Org); RLPSI (GPC restricted): Org; RLPSI (Yld restricted): Org	Selected in all 5 weights (LPS (Org); RLPSI (GPC restricted): Org; RLPSI (Yld restricted): Org)	2nd best
Lovitt	Org	CWRS	LPSI	Canterra Seeds	Yes (N=22)	86.53	95.28	5	16.33	86.53	95.28	5	16.33	86.53	95.28	5	16.33	86.53	95.28	5	16.33	86.53	95.28	5	16.33	Selected in all 5 weights	LPS (Con) plus RLPSI (Yld restricted): Org	Selected in all 5 weights (LPS (Con) plus RLPSI (Yld restricted): Org)
Lovitt	Org	CWRS	RLPSI (Yld restricted)	Canterra Seeds	Yes (N=22)	86.53	95.28	5	16.33	86.53	95.28	5	16.33	86.53	95.28	5	16.33	86.53	95.28	5	16.33	86.53	95.28	5	16.33	Selected in all 5 weights	LPS (Con) plus RLPSI (Yld restricted): Org	Selected in all 5 weights (LPS (Con) plus RLPSI (Yld restricted): Org)
Pasteur	Con	CWSP	RLPSI (GPC restricted)	Plantomar Ltd		97.34	77.16	5.86	13.54	97.34	77.16	5.86	13.54	97.34	77.16	5.86	13.54	97.34	77.16	5.86	13.54	97.34	77.16	5.86	13.54	Selected in all 5 weights	RLPSI (GPC restricted): Con	Selected in all 5 weights (RLPSI (GPC restricted): Con)
PT472	Org	CWRS	LPSI	Agriculture and AgriFood Canada	Yes (N=22)	83.18	93	5.01	15.95	83.18	93	5.01	15.95	83.18	93	5.01	15.95	83.18	93	5.01	15.95	83.18	93	5.01	15.95	Selected in all 5 weights	LPS (Con) plus RLPSI (Yld restricted): Org	Selected in all 5 weights (LPS (Con) plus RLPSI (Yld restricted): Org)
PT472	Org	CWRS	RLPSI (Yld restricted)	Agriculture and AgriFood Canada	Yes (N=22)	83.18	93	5.01	15.95	83.18	93	5.01	15.95	83.18	93	5.01	15.95	83.18	93	5.01	15.95	83.18	93	5.01	15.95	Selected in all 5 weights	LPS (Con) plus RLPSI (Yld restricted): Org	Selected in all 5 weights (LPS (Con) plus RLPSI (Yld restricted): Org)
PT479	Con	CWRS	LPSI	Agriculture and AgriFood Canada		89.83	86.16	4.75	16.47	89.83	86.16	4.75	16.47	89.83	86.16	4.75	16.47	89.83	86.16	4.75	16.47	89.83	86.16	4.75	16.47	Selected in all 5 weights	LPS (Con) plus RLPSI (Yld restricted): Con	Selected in all 5 weights (LPS (Con) plus RLPSI (Yld restricted): Con)
PT479	Con	CWRS	RLPSI (Yld restricted)	Agriculture and AgriFood Canada		89.83	86.16	4.75	16.47	89.83	86.16	4.75	16.47	89.83	86.16	4.75	16.47	89.83	86.16	4.75	16.47	89.83	86.16	4.75	16.47	Selected in all 5 weights	LPS (Con) plus RLPSI (Yld restricted): Con	Selected in all 5 weights (LPS (Con) plus RLPSI (Yld restricted): Con)
Somerset	Con	CWRS	LPSI	Secan Association	Yes (N=22)	86.47	90.53	4.01	17.55									86.47	90.53	4.01	17.55					Selected in 2 weights	LPS (Con-Org) plus RLPSI (Yld restricted): Con & Org	Selected in 2 weights (LPS (Con-Org) plus RLPSI (Yld restricted): Con & Org)
Somerset	Con	CWRS	RLPSI (Yld restricted)	Secan Association	Yes (N=22)	86.47	90.53	4.01	17.55	86.47	90.53	4.01	17.55	86.47	90.53	4.01	17.55	86.47	90.53	4.01	17.55	86.47	90.53	4.01	17.55	Selected in all 5 weights	LPS (Con-Org) plus RLPSI (Yld restricted): Con & Org	Selected in all 5 weights (LPS (Con-Org) plus RLPSI (Yld restricted): Con & Org)
Somerset	Org	CWRS	LPSI	Secan Association	Yes (N=22)	86.06	98.66	4.48	17.68	86.06	98.66	4.48	17.68	86.06	98.66	4.48	17.68	86.06	98.66	4.48	17.68	86.06	98.66	4.48	17.68	Selected in all 5 weights	LPS (Con-Org) plus RLPSI (Yld restricted): Con & Org	Selected in all 5 weights (LPS (Con-Org) plus RLPSI (Yld restricted): Con & Org)	Best
Somerset	Org	CWRS	RLPSI (Yld restricted)	Secan Association	Yes (N=22)	86.06	98.66	4.48	17.68	86.06	98.66	4.48	17.68	86.06	98.66	4.48	17.68	86.06	98.66	4.48	17.68	86.06	98.66	4.48	17.68	Selected in all 5 weights	LPS (Con-Org) plus RLPSI (Yld restricted): Con & Org	Selected in all 5 weights (LPS (Con-Org) plus RLPSI (Yld restricted): Con & Org)	Best
Stettler	Con	CWRS	LPSI	Agriculture and AgriFood Canada		89.61	79.64	4.9	16.09	89.61	79.64	4.9	16.09	89.61	79.64	4.9	16.09	89.61	79.64	4.9	16.09	89.61	79.64	4.9	16.09	Selected in all 5 weights	LPS (Con), RLPSI (GPC restricted) Con, and RLPSI (Yld restricted) Con	Selected in all 5 weights (LPS (Con), RLPSI (GPC restricted) Con, and RLPSI (Yld restricted) Con)
Stettler	Con	CWRS	RLPSI (GPC restricted)	Agriculture and AgriFood Canada		89.61	79.64	4.9	16.09	89.61	79.64	4.9	16.09	89.61	79.64	4.9	16.09	89.61	79.64	4.9	16.09					Selected in 4 weights	LPS (Con), RLPSI (GPC restricted) Con, and RLPSI (Yld restricted) Con	Selected in 4 weights (LPS (Con), RLPSI (GPC restricted) Con, and RLPSI (Yld restricted) Con)
Stettler	Con	CWRS	RLPSI (Yld restricted)	Agriculture and AgriFood Canada		89.61	79.64	4.9	16.09	89.61	79.64	4.9	16.09	89.61	79.64	4.9	16.09	89.61	79.64	4.9	16.09	89.61	79.64	4.9	16.09	Selected in all 5 weights	LPS (Con), RLPSI (GPC restricted) Con, and RLPSI (Yld restricted) Con	Selected in all 5 weights (LPS (Con), RLPSI (GPC restricted) Con, and RLPSI (Yld restricted) Con)
Superb	Org	CWRS	RLPSI (GPC restricted)	Agriculture and AgriFood Canada		86.92	83.44	5.6	14.42	86.92	83.44	5.6	14.42	86.92	83.44	5.6	14.42	86.92	83.44	5.6	14.42	86.92	83.44	5.6	14.42	Selected in all 5 weights	RLPSI (GPC restricted): Org	Selected in all 5 weights (RLPSI (GPC restricted): Org)
SWS52	Con	CWSWS	RLPSI (GPC restricted)			95.3	82.67	6.56	11.15	95.3	82.67	6.56	11.15	95.3	82.67	6.56	11.15	95.3	82.67	6.56	11.15	95.3	82.67	6.56	11.15	Selected in all 5 weights	RLPSI (GPC restricted): Con & Org	Selected in all 5 weights (RLPSI (GPC restricted): Con & Org)
SWS52	Org	CWSWS	RLPSI (GPC restricted)			93.48	78.68	6.74	10.58	93.48	78.68	6.74	10.58	93.48	78.68	6.74	10.58	93.48	78.68	6.74	10.58	93.48	78.68	6.74	10.58	Selected in all 5 weights	RLPSI (GPC restricted): Con & Org	Selected in all 5 weights (RLPSI (GPC restricted): Con & Org)
SY 433	Con	CWRS	LPSI	Syngenta Canada Inc.		88.12	72.88	4.81	16.03	88.12	72.88	4.81	16.03	88.12	72.88	4.81	16.03	88.12	72.88	4.81	16.03	88.12	72.88	4.81	16.03	Selected in all 5 weights	LPS (Con), RLPSI (GPC restricted) Con, and RLPSI (Yld restricted) Con	Selected in all 5 weights (LPS (Con), RLPSI (GPC restricted) Con, and RLPSI (Yld restricted) Con)
SY 433	Con	CWRS	RLPSI (GPC restricted)	Syngenta Canada Inc.														88.12	72.88	4.81	16.03	88.12	72.88	4.81	16.03	Selected in 2 weights	LPS (Con), RLPSI (GPC restricted) Con, and RLPSI (Yld restricted) Con	Selected in 2 weights (LPS (Con), RLPSI (GPC restricted) Con, and RLPSI (Yld restricted) Con)
SY 433	Con	CWRS	RLPSI (Yld restricted)	Syngenta Canada Inc.		88.12	72.88	4.81	16.03	88.12	72.88	4.81	16.03	88.12	72.88	4.81	16.03	88.12	72.88	4.81	16.03	88.12	72.88	4.81	16.03	Selected in all 5 weights	LPS (Con), RLPSI (GPC restricted) Con, and RLPSI (Yld restricted) Con	Selected in all 5 weights (LPS (Con), RLPSI (GPC restricted) Con, and RLPSI (Yld restricted) Con)
SY479 VB	Con	CWRS	LPSI	Syngenta Canada Inc.	Yes (N=22)	87.83	88.76	4.43	17.09	87.83	88.76	4.43	17.09	87.83	88.76	4.43	17.09	87.83	88.76	4.43	17.09	87.83	88.76	4.43	17.09	Selected in all 5 weights	LPS (Con-Org) plus RLPSI (Yld restricted): Con & Org	Selected in all 5 weights (LPS (Con-Org) plus RLPSI (Yld restricted): Con & Org)
SY479 VB	Con	CWRS	RLPSI (Yld restricted)	Syngenta Canada Inc.	Yes (N=22)	87.83	88.76	4.43	17.09	87.83	88.76	4.43	17.09	87.83	88.76	4.43	17.09	87.83	88.76	4.43	17.09	87.83	88.76	4.43	17.09	Selected in all 5 weights	LPS (Con-Org) plus RLPSI (Yld restricted): Con & Org	Selected in all 5 weights (LPS (Con-Org) plus RLPSI (Yld restricted): Con & Org)
SY479 VB	Org	CWRS	LPSI	Syngenta Canada Inc.	Yes (N=22)	85.88	94.51	4.46	16.88	85.88	94.51	4.46	16.88					85.88	94.51	4.46	16.88	85.88	94.51	4.46	16.88	Selected in 4 weights	LPS (Con-Org) plus RLPSI (Yld restricted): Con & Org	Selected in 4 weights (LPS (Con-Org) plus RLPSI (Yld restricted): Con & Org)
SY479 VB	Org	CWRS	RLPSI (Yld restricted)	Syngenta Canada Inc.	Yes (N=22)	85.88	94.51	4.46	16.88	85.88	94.51	4.46	16.88	85.88	94.51	4.46	16.88	85.88	94.51	4.46	16.88	85.88	94.51	4.46	16.88	Selected in all 5 weights	LPS (Con-Org) plus RLPSI (Yld restricted): Con & Org	Selected in all 5 weights (LPS (Con-Org) plus RLPSI (Yld restricted): Con & Org)	Best
SY637	Con	CWRS	LPSI	Syngenta Canada Inc.		88.87	82.12	4.28	16.91																	Selected in 1 weight	LPS (Con) plus RLPSI (Yld restricted): Con	Selected in 1 weight (LPS (Con) plus RLPSI (Yld restricted): Con)
SY637	Con	CWRS	RLPSI (Yld restricted)	Syngenta Canada Inc.		88.87	82.12	4.28	16.91	88.87	82.12	4.28	16.91	88.87	82.12	4.28	16.91									Selected in 3 weights	LPS (Con) plus RLPSI (Yld restricted): Con	Selected in 3 weights (LPS (Con) plus RLPSI (Yld restricted): Con)
SY985	Org	CPSR	RLPSI (GPC restricted)	Syngenta Canada Inc.		89.12	82.04	5.71	13.93	89.12	82.04	5.71	13.93	89.12	82.04	5.71	13.93	89.12	82.04	5.71	13.93	89.12	82.04	5.71	13.93	Selected in all 5 weights	RLPSI (GPC restricted): Org	Selected in all 5 weights (RLPSI (GPC restricted): Org)
SY Rowyn	Con	CPSR	LPSI	Syngenta Canada Inc.										92.37	72.54	5.22	15.16									Selected in 1 weight	LPS (Con), RLPSI (GPC restricted) Con	Selected in 1 weight (LPS (Con), RLPSI (GPC restricted) Con)
SY Rowyn	Con	CPSR	RLPSI (GPC restricted)	Syngenta Canada Inc.		92.37	72.54	5.22	15.16	92.37	72.54	5.22	15.16	92.37	72.54	5.22	15.16	92.37	72.54	5.22	15.16	92.37	72.54	5.22	15.16	Selected in all 5 weights	LPS (Con), RLPSI (GPC restricted) Con	Selected in all 5 weights (LPS (Con), RLPSI (GPC restricted) Con)
Zealand	Con	CWRS	RLPSI (GPC restricted)	University of Alberta	Yes (N=22)													86.61	90.12	5.17	15.53	86.61	90.12	5.17	15.53	Selected in 2 weights	LPS (Org); RLPSI (GPC restricted): Con & Org; RLPSI (Yld restricted): Org	Selected in 2 weights (LPS (Org); RLPSI (GPC restricted): Con & Org; RLPSI (Yld restricted): Org)
Zealand	Org	CWRS	LPSI	University of Alberta	Yes (N=22)	84.69	95.53	5.5	15.62	84.69	95.53	5.5	15.62	84.69	95.53	5.5	15.62	84.69	95.53	5.5	15.62	84.69	95.53	5.5	15.62	Selected in all 5 weights	LPS (Org); RLPSI (GPC restricted): Con & Org; RLPSI (Yld restricted): Org	Selected in all 5 weights (LPS (Org); RLPSI (GPC restricted): Con & Org; RLPSI (Yld restricted): Org)	2nd best
Zealand	Org	CWRS	RLPSI (GPC restricted)	University of Alberta	Yes (N=22)	84.69	95.53	5.5	15.62	84.69	95.53	5.5	15.62	84.69	95.53	5.5	15.62	84.69	95.53	5.5	15.62	84.69	95.53	5.5	15.62	Selected in all 5 weights	LPS (Org); RLPSI (GPC restricted): Con & Org; RLPSI (Yld restricted): Org	Selected in all 5 weights (LPS (Org); RLPSI (GPC restricted): Con & Org; RLPSI (Yld restricted): Org)	2nd best
Zealand	Org	CWRS	RLPSI (Yld restricted)	University of Alberta	Yes (N=22)	84.69	95.53	5.5	15.62	84.69	95.53	5.5	15.62	84.69	95.53	5.5	15.62	84.69	95.53	5.5	15.62	84.69	95.53	5.5	15.62	Selected in all 5 weights	LPS (Org); RLPSI (GPC restricted): Con & Org; RLPSI (Yld restricted): Org	Selected in all 5 weights (LPS (Org); RLPSI (GPC restricted): Con & Org; RLPSI (Yld restricted): Org)	2nd best

## Sheet: Pivotal
				LPSI																	RLPSI (GPC restricted)																	RLPSI (Yld restricted)
				w(-1,-1,120,70)			w(-1,-1,130,70)			w(-1,-1,150,70)			w(-5,-1,130,70)			w(-5,-1,150,70)					w(-1,-1,120,70)			w(-1,-1,130,70)			w(-1,-1,150,70)			w(-5,-1,130,70)			w(-5,-1,150,70)					w(-1,-1,120,70)			w(-1,-1,130,70)			w(-1,-1,150,70)			w(-5,-1,130,70)
Cultivar	Class	Intitution	Final selection (N=22)	Con	Org	Con + Org	Con	Org	Con + Org	Con	Org	Con + Org	Con	Org	Con + Org	Con	Org	Con + Org	Total	Comment	Con	Org	Con + Org	Con	Org	Con + Org	Con	Org	Con + Org	Con	Org	Con + Org	Con	Org	Con + Org	Total	Comment	Con	Org	Con + Org	Con	Org	Con + Org	Con	Org	Con + Org	Con	Org	Con + Org
5605HR CL	CNHR	Syngenta Canada Inc.	N=17	1	1	2	1	1	2	1	1	2	1	1	2	1	1	2	10	All 5 weights and both Con & Org	1	1	2	1	1	2	1	1	2	1		1	1		1	8		1	1	2	1	1	2	1	1	2	1	1	2
5701PR	CPSR	Nutrien AG Solutions Inc.					1		1	1		1							2		1		1	1		1	1		1							3
5702PR	CPSR	Syngenta Canada Inc.	Yes using RLPSI (GPC=0)																			1	1		1	1		1	1		1	1		1	1	5	All 5 weights Org
AAC Awesome	CWSP	Agriculture and AgriFood Canada	Yes using RLPSI (GPC=0)																		1	1	2	1	1	2	1	1	2	1	1	2	1	1	2	10	All 5 weights both Con & Org
AAC Brandon	CWRS	Agriculture and AgriFood Canada	N=17	1	1	2	1	1	2	1	1	2	1	1	2	1	1	2	10	All 5 weights and both Con & Org	1	1	2	1	1	2	1	1	2	1	1	2	1	1	2	10	All 5 weights both Con & Org	1	1	2	1	1	2	1	1	2	1	1	2
AAC Castle	CPSR	Agriculture and AgriFood Canada	N=22	1		1	1		1	1	1	2	1		1	1		1	6		1	1	2	1	1	2	1	1	2	1	1	2	1	1	2	10	All 5 weights both Con & Org	1		1	1		1	1		1	1		1
AAC Elie	CWRS	Agriculture and AgriFood Canada	Yes using RLPSI (GPC=0)																			1	1		1	1		1	1		1	1		1	1	5	All 5 weights Org
AAC Foray	CPSR	Agriculture and AgriFood Canada	Yes using RLPSI (GPC=0)																			1	1		1	1		1	1		1	1		1	1	5	All 5 weights Org
AAC Goodwin	CPSR	Agriculture and AgriFood Canada	N=17	1	1	2	1	1	2	1	1	2	1	1	2	1	1	2	10	All 5 weights and both Con & Org	1	1	2	1	1	2	1	1	2	1	1	2	1	1	2	10	All 5 weights both Con & Org	1	1	2	1	1	2	1	1	2	1	1	2
AAC Penhold	CPSR	Agriculture and AgriFood Canada	N=22				1		1	1	1	2				1		1	4		1	1	2	1	1	2	1	1	2	1	1	2	1	1	2	10	All 5 weights both Con & Org
AAC Redberry	CWRS	Agriculture and AgriFood Canada		1		1	1		1	1		1	1		1	1		1	5		1		1	1		1	1		1	1		1	1		1	5		1		1	1		1	1		1	1		1
AAC Tisdale	CWRS	Agriculture and AgriFood Canada	N=22	1	1	2	1	1	2				1	1	2	1	1	2	8																			1	1	2	1	1	2	1	1	2	1	1	2
AAC Viewfield	CWRS	Agriculture and AgriFood Canada	N=17		1	1		1	1		1	1		1	1		1	1	5	All 5 weights Org	1	1	2	1	1	2	1	1	2	1	1	2	1	1	2	10	All 5 weights both Con & Org		1	1		1	1		1	1		1	1
AC Cadillac	CWRS	Farm Pure Seeds (ex SW Seed Canada Ltd)	N=17	1	1	2	1	1	2		1	1	1	1	2	1	1	2	9	All 5 weights Org																		1	1	2	1	1	2	1	1	2	1	1	2
Burnside	CWES	Agriculture and AgriFood Canada		1		1	1		1	1		1	1		1	1		1	5																			1		1	1		1	1		1	1		1
BW5020	CWRS	University of Alberta																			1		1	1		1	1		1	1		1	1		1	5
BYT14-19	CWRS	University of Alberta	N=22	1	1	2	1	1	2	1		1	1	1	2	1		1	8																			1	1	2	1	1	2	1	1	2	1	1	2
CDC Alsask	CWRS	University of Saskatchewan	N=17		1	1		1	1		1	1		1	1		1	1	5	All 5 weights Org																			1	1		1	1		1	1		1	1
CDC Bounty	CWRS	University of Saskatchewan	N=17		1	1		1	1		1	1		1	1		1	1	5	All 5 weights Org																			1	1		1	1		1	1		1	1
CDC Cordon CLPlus	CNHR	University of Saskatchewan	Yes using RLPSI (GPC=0)																			1	1		1	1		1	1		1	1		1	1	5	All 5 weights Org
CDC Hughes	CWRS	University of Saskatchewan		1		1	1		1	1	1	2	1		1	1	1	2	7		1	1	2	1	1	2	1		1	1	1	2	1	1	2	9		1		1	1		1	1		1	1		1
CDC Imagine	CWRS	University of Saskatchewan	N=17		1	1		1	1		1	1		1	1		1	1	5	All 5 weights Org		1	1		1	1		1	1		1	1		1	1	5	All 5 weights Org		1	1		1	1		1	1		1	1
CDC Landmark	CWRS	University of Saskatchewan		1		1	1		1	1		1	1		1	1		1	5		1		1	1		1	1		1	1		1	1		1	5		1		1	1		1	1		1	1		1
CDC Thrive	CWRS	University of Saskatchewan	N=17		1	1		1	1		1	1		1	1		1	1	5	All 5 weights Org																			1	1		1	1		1	1		1	1
CDC Throttle	CWSP	University of Saskatchewan	Yes using RLPSI (GPC=0)																		1	1	2	1	1	2	1	1	2	1	1	2	1	1	2	10	All 5 weights both Con & Org
CDC VR Morris	CWRS	University of Saskatchewan	N=17	1	1	2	1	1	2	1	1	2	1	1	2	1	1	2	10	All 5 weights and both Con & Org																		1	1	2	1	1	2	1	1	2	1	1	2
CDN Bison	CWES	Agriculture and AgriFood Canada								1		1							1		1		1	1		1	1		1				1		1	4
Conquer	CNHR	Agriculture and AgriFood Canada	N=17	1	1	2	1	1	2	1	1	2	1	1	2	1	1	2	10	All 5 weights and both Con & Org	1	1	2	1	1	2	1	1	2	1	1	2	1	1	2	10	All 5 weights both Con & Org	1	1	2	1	1	2	1	1	2	1	1	2
Faller	CNHR	Seed Depot Corp.	Yes using RLPSI (GPC=0)																		1	1	2	1	1	2	1	1	2	1	1	2	1	1	2	10	All 5 weights both Con & Org
Glencross	CWES	Agriculture and AgriFood Canada											1		1	1		1	2																												1		1
Goodeve	CWRS	Agriculture and AgriFood Canada	N=17		1	1		1	1		1	1		1	1		1	1	5	All 5 weights Org																			1	1		1	1		1	1		1	1
Jake	CWRS	University of Alberta		1		1	1		1	1		1	1		1	1		1	5																			1		1	1		1	1		1	1		1
Lillian	CNHR	Secan Association	N=17		1	1		1	1		1	1		1	1		1	1	5	All 5 weights Org								1	1		1	1		1	1	3			1	1		1	1		1	1		1	1
Lovitt	CWRS	Canterra Seeds	N=17		1	1		1	1		1	1		1	1		1	1	5	All 5 weights Org																			1	1		1	1		1	1		1	1
Pasteur	CWSP	Plantomar Ltd																			1		1	1		1	1		1	1		1	1		1	5
PT472	CWRS	Agriculture and AgriFood Canada	N=17		1	1		1	1		1	1		1	1		1	1	5	All 5 weights Org																			1	1		1	1		1	1		1	1
PT479	CWRS	Agriculture and AgriFood Canada		1		1	1		1	1		1	1		1	1		1	5																			1		1	1		1	1		1	1		1
Somerset	CWRS	Secan Association	N=17	1	1	2		1	1		1	1	1	1	2		1	1	7	All 5 weights Org																		1	1	2	1	1	2	1	1	2	1	1	2
Stettler	CWRS	Agriculture and AgriFood Canada		1		1	1		1	1		1	1		1	1		1	5		1		1	1		1	1		1	1		1				4		1		1	1		1	1		1	1		1
Superb	CWRS	Agriculture and AgriFood Canada	Yes using RLPSI (GPC=0)																			1	1		1	1		1	1		1	1		1	1	5	All 5 weights Org
SWS52	CWSWS		Yes using RLPSI (GPC=0)																		1	1	2	1	1	2	1	1	2	1	1	2	1	1	2	10	All 5 weights both Con & Org
SY 433	CWRS	Syngenta Canada Inc.		1		1	1		1	1		1	1		1	1		1	5											1		1	1		1	2		1		1	1		1	1		1	1		1
SY Rowyn	CPSR	Syngenta Canada Inc.								1		1							1		1		1	1		1	1		1	1		1	1		1	5
SY479 VB	CWRS	Syngenta Canada Inc.	N=22	1	1	2	1	1	2	1		1	1	1	2	1	1	2	9																			1	1	2	1	1	2	1	1	2	1	1	2
SY637	CWRS	Syngenta Canada Inc.		1		1													1																			1		1	1		1	1		1
SY985	CPSR	Syngenta Canada Inc.	Yes using RLPSI (GPC=0)																			1	1		1	1		1	1		1	1		1	1	5	All 5 weights Org
Zealand	CWRS	University of Alberta	N=17		1	1		1	1		1	1		1	1		1	1	5	All 5 weights Org		1	1		1	1		1	1	1	1	2	1	1	2	7	All 5 weights Org		1	1		1	1		1	1		1	1
[truncated: 8 more columns]

## Sheet: Best 32 cultivars
Program	Method	Method for JMP	Restricted trait	Population	Management	Economic weight code	Economic weight	S/N	GID	Maturity (d)	Height (cm)	Yield (t/ha)	GPC (%)	Index	Cultivar	Cultivar for JMP	Market class	Registration year	Donors for Org (N=17)	Donors for Org (N=32)	Donors for Org (N=22)	Institution
R	LPSI	X-LPSI	None	BVC	Con	Weight-6	w(-1,-1,150,70)	122	GID-124	93.38	74.63	4.97	16.63	1486.93	AAC Castle	*AAC Castle	CPSR	2018		Yes using RLPSI (GPC=0)	Yes	Agriculture and AgriFood Canada
R	LPSI	X-LPSI	None	BVC	Con	Weight-6	w(-1,-1,150,70)	97	GID-099	91.71	84.45	5.16	16.36	1476.9	Conquer	*Conquer	CNHR	2010	Donor for Org	Yes (all 3 indexes)	Yes	Agriculture and AgriFood Canada
R	LPSI	X-LPSI	None	BVC	Con	Weight-6	w(-1,-1,150,70)	62	GID-062	90.48	78.59	5.64	15.15	1463.38	AAC Goodwin	*AAC Goodwin	CPSR	2017	Donor for Org	Yes (all 3 indexes)	Yes	Agriculture and AgriFood Canada
R	LPSI	X-LPSI	None	BVC	Con	Weight-6	w(-1,-1,150,70)	2	GID-002	89.61	84.79	4.86	16.7	1462.9	5605HR CL	*5605HR CL	CNHR	2013	Donor for Org	Yes (LPSI and RLPS Yld=0)	Yes	Syngenta Canada Inc.
R	LPSI	X-LPSI	None	BVC	Con	Weight-6	w(-1,-1,150,70)	91	GID-092	89.62	78.83	4.4	17.37	1461.35	CDC VR Morris	*CDC VR Morris	CWRS	2012	Donor for Org	Yes (LPSI and RLPS Yld=0)	Yes	University of Saskatchewan
R	LPSI	X-LPSI	None	BVC	Con	Weight-6	w(-1,-1,150,70)	7	GID-007	91.03	78.13	5.24	15.72	1455.46	AAC Brandon	*AAC Brandon	CWRS	2013	Donor for Org	Yes (all 3 indexes)	Yes	Agriculture and AgriFood Canada
R	LPSI	X-LPSI	None	BVC	Con	Weight-6	w(-1,-1,150,70)	16	GID-016	91.39	72.43	5.2	15.33	1436	AAC Penhold	*AAC Penhold	CPSR	2014		Yes using RLPSI (GPC=0)	Yes	Agriculture and AgriFood Canada
R	LPSI	X-LPSI	None	BVC	Con	Weight-6	w(-1,-1,150,70)	187	GID-189	87.83	88.76	4.43	17.09	1433.44	SY479 VB	*SY479 VB	CWRS	2016		Yes (RLPSI Yld=0)	Yes	Syngenta Canada Inc.
R	LPSI	X-LPSI	None	BVC	Con	Weight-6	w(-1,-1,150,70)	68	GID-068	88.14	85.38	4.26	17.24	1428.91	BYT14-19	*BYT14-19	CWRS			Yes (RLPSI Yld=0)	Yes	University of Alberta
R	LPSI	X-LPSI	None	BVC	Con	Weight-7	w(-5,-1,150,70)	122	GID-124	93.38	74.63	4.97	16.63	1152.49	AAC Castle	*AAC Castle	CPSR	2018		Yes using RLPSI (GPC=0)	Yes	Agriculture and AgriFood Canada
R	LPSI	X-LPSI	None	BVC	Con	Weight-7	w(-5,-1,150,70)	97	GID-099	91.71	84.45	5.16	16.36	1148.1	Conquer	*Conquer	CNHR	2010	Donor for Org	Yes (all 3 indexes)	Yes	Agriculture and AgriFood Canada
R	LPSI	X-LPSI	None	BVC	Con	Weight-7	w(-5,-1,150,70)	2	GID-002	89.61	84.79	4.86	16.7	1142.01	5605HR CL	*5605HR CL	CNHR	2013	Donor for Org	Yes (LPSI and RLPS Yld=0)	Yes	Syngenta Canada Inc.
R	LPSI	X-LPSI	None	BVC	Con	Weight-7	w(-5,-1,150,70)	91	GID-092	89.62	78.83	4.4	17.37	1141.13	CDC VR Morris	*CDC VR Morris	CWRS	2012	Donor for Org	Yes (LPSI and RLPS Yld=0)	Yes	University of Saskatchewan
R	LPSI	X-LPSI	None	BVC	Con	Weight-7	w(-5,-1,150,70)	62	GID-062	90.48	78.59	5.64	15.15	1138.17	AAC Goodwin	*AAC Goodwin	CPSR	2017	Donor for Org	Yes (all 3 indexes)	Yes	Agriculture and AgriFood Canada
R	LPSI	X-LPSI	None	BVC	Con	Weight-7	w(-5,-1,150,70)	7	GID-007	91.03	78.13	5.24	15.72	1128.85	AAC Brandon	*AAC Brandon	CWRS	2013	Donor for Org	Yes (all 3 indexes)	Yes	Agriculture and AgriFood Canada
R	LPSI	X-LPSI	None	BVC	Con	Weight-7	w(-5,-1,150,70)	187	GID-189	87.83	88.76	4.43	17.09	1119.45	SY479 VB	*SY479 VB	CWRS	2016		Yes (RLPSI Yld=0)	Yes	Syngenta Canada Inc.
R	LPSI	X-LPSI	None	BVC	Con	Weight-7	w(-5,-1,150,70)	68	GID-068	88.14	85.38	4.26	17.24	1114.04	BYT14-19	*BYT14-19	CWRS			Yes (RLPSI Yld=0)	Yes	University of Alberta
R	LPSI	X-LPSI	None	BVC	Con	Weight-7	w(-5,-1,150,70)	26	GID-026	86.84	89.35	4.48	16.86	1113.04	AC Cadillac	*AC Cadillac	CWRS	1996	Donor for Org	Yes (LPSI and RLPS Yld=0)	Yes	Farm Pure Seeds (ex SW Seed Canada Ltd)
R	LPSI	X-LPSI	None	BVC	Con	Weight-7	w(-5,-1,150,70)	156	GID-158	87.85	79.98	4.62	16.43	1111.95	AAC Tisdale	*AAC Tisdale	CWRS	2017		Yes (RLPSI Yld=0)	Yes	Agriculture and AgriFood Canada
R	LPSI	X-LPSI	None	BVC	Con	Weight-7	w(-5,-1,150,70)	16	GID-016	91.39	72.43	5.2	15.33	1108.06	AAC Penhold	*AAC Penhold	CPSR	2014		Yes using RLPSI (GPC=0)	Yes	Agriculture and AgriFood Canada
R	LPSI	X-LPSI	None	BVC	Con	Weight-8	w(-1,-1,130,70)	122	GID-124	93.38	74.63	4.97	16.63	1395.16	AAC Castle	*AAC Castle	CPSR	2018		Yes using RLPSI (GPC=0)	Yes	Agriculture and AgriFood Canada
R	LPSI	X-LPSI	None	BVC	Con	Weight-8	w(-1,-1,130,70)	97	GID-099	91.71	84.45	5.16	16.36	1384.51	Conquer	*Conquer	CNHR	2010	Donor for Org	Yes (all 3 indexes)	Yes	Agriculture and AgriFood Canada
R	LPSI	X-LPSI	None	BVC	Con	Weight-8	w(-1,-1,130,70)	91	GID-092	89.62	78.83	4.4	17.37	1379.85	CDC VR Morris	*CDC VR Morris	CWRS	2012	Donor for Org	Yes (LPSI and RLPS Yld=0)	Yes	University of Saskatchewan
R	LPSI	X-LPSI	None	BVC	Con	Weight-8	w(-1,-1,130,70)	2	GID-002	89.61	84.79	4.86	16.7	1375.69	5605HR CL	*5605HR CL	CNHR	2013	Donor for Org	Yes (LPSI and RLPS Yld=0)	Yes	Syngenta Canada Inc.
R	LPSI	X-LPSI	None	BVC	Con	Weight-8	w(-1,-1,130,70)	62	GID-062	90.48	78.59	5.64	15.15	1363.73	AAC Goodwin	*AAC Goodwin	CPSR	2017	Donor for Org	Yes (all 3 indexes)	Yes	Agriculture and AgriFood Canada
R	LPSI	X-LPSI	None	BVC	Con	Weight-8	w(-1,-1,130,70)	7	GID-007	91.03	78.13	5.24	15.72	1361.17	AAC Brandon	*AAC Brandon	CWRS	2013	Donor for Org	Yes (all 3 indexes)	Yes	Agriculture and AgriFood Canada
R	LPSI	X-LPSI	None	BVC	Con	Weight-8	w(-1,-1,130,70)	187	GID-189	87.83	88.76	4.43	17.09	1353.56	SY479 VB	*SY479 VB	CWRS	2016		Yes (RLPSI Yld=0)	Yes	Syngenta Canada Inc.
R	LPSI	X-LPSI	None	BVC	Con	Weight-8	w(-1,-1,130,70)	68	GID-068	88.14	85.38	4.26	17.24	1350.79	BYT14-19	*BYT14-19	CWRS			Yes (RLPSI Yld=0)	Yes	University of Alberta
R	LPSI	X-LPSI	None	BVC	Con	Weight-8	w(-1,-1,130,70)	26	GID-026	86.84	89.35	4.48	16.86	1343.48	AC Cadillac	*AC Cadillac	CWRS	1996	Donor for Org	Yes (LPSI and RLPS Yld=0)	Yes	Farm Pure Seeds (ex SW Seed Canada Ltd)
R	LPSI	X-LPSI	None	BVC	Con	Weight-8	w(-1,-1,130,70)	156	GID-158	87.85	79.98	4.62	16.43	1342.42	AAC Tisdale	*AAC Tisdale	CWRS	2017		Yes (RLPSI Yld=0)	Yes	Agriculture and AgriFood Canada
R	LPSI	X-LPSI	None	BVC	Con	Weight-8	w(-1,-1,130,70)	16	GID-016	91.39	72.43	5.2	15.33	1341.16	AAC Penhold	*AAC Penhold	CPSR	2014		Yes using RLPSI (GPC=0)	Yes	Agriculture and AgriFood Canada
R	LPSI	X-LPSI	None	BVC	Con	Weight-9	w(-5,-1,130,70)	122	GID-124	93.38	74.63	4.97	16.63	1060.71	AAC Castle	*AAC Castle	CPSR	2018		Yes using RLPSI (GPC=0)	Yes	Agriculture and AgriFood Canada
R	LPSI	X-LPSI	None	BVC	Con	Weight-9	w(-5,-1,130,70)	91	GID-092	89.62	78.83	4.4	17.37	1059.63	CDC VR Morris	*CDC VR Morris	CWRS	2012	Donor for Org	Yes (LPSI and RLPS Yld=0)	Yes	University of Saskatchewan
R	LPSI	X-LPSI	None	BVC	Con	Weight-9	w(-5,-1,130,70)	97	GID-099	91.71	84.45	5.16	16.36	1055.71	Conquer	*Conquer	CNHR	2010	Donor for Org	Yes (all 3 indexes)	Yes	Agriculture and AgriFood Canada
R	LPSI	X-LPSI	None	BVC	Con	Weight-9	w(-5,-1,130,70)	2	GID-002	89.61	84.79	4.86	16.7	1054.81	5605HR CL	*5605HR CL	CNHR	2013	Donor for Org	Yes (LPSI and RLPS Yld=0)	Yes	Syngenta Canada Inc.
R	LPSI	X-LPSI	None	BVC	Con	Weight-9	w(-5,-1,130,70)	187	GID-189	87.83	88.76	4.43	17.09	1039.56	SY479 VB	*SY479 VB	CWRS	2016		Yes (RLPSI Yld=0)	Yes	Syngenta Canada Inc.
R	LPSI	X-LPSI	None	BVC	Con	Weight-9	w(-5,-1,130,70)	62	GID-062	90.48	78.59	5.64	15.15	1038.51	AAC Goodwin	*AAC Goodwin	CPSR	2017	Donor for Org	Yes (all 3 indexes)	Yes	Agriculture and AgriFood Canada
R	LPSI	X-LPSI	None	BVC	Con	Weight-9	w(-5,-1,130,70)	68	GID-068	88.14	85.38	4.26	17.24	1035.92	BYT14-19	*BYT14-19	CWRS			Yes (RLPSI Yld=0)	Yes	University of Alberta
R	LPSI	X-LPSI	None	BVC	Con	Weight-9	w(-5,-1,130,70)	7	GID-007	91.03	78.13	5.24	15.72	1034.56	AAC Brandon	*AAC Brandon	CWRS	2013	Donor for Org	Yes (all 3 indexes)	Yes	Agriculture and AgriFood Canada
R	LPSI	X-LPSI	None	BVC	Con	Weight-9	w(-5,-1,130,70)	26	GID-026	86.84	89.35	4.48	16.86	1032.9	AC Cadillac	*AC Cadillac	CWRS	1996	Donor for Org	Yes (LPSI and RLPS Yld=0)	Yes	Farm Pure Seeds (ex SW Seed Canada Ltd)
R	LPSI	X-LPSI	None	BVC	Con	Weight-9	w(-5,-1,130,70)	179	GID-181	86.47	90.53	4.01	17.55	1030.69	Somerset	*Somerset	CWRS	2005	Donor for Org	Yes (LPSI and RLPS Yld=0)	Yes	Secan Association
R	LPSI	X-LPSI	None	BVC	Con	Weight-9	w(-5,-1,130,70)	156	GID-158	87.85	79.98	4.62	16.43	1028.02	AAC Tisdale	*AAC Tisdale	CWRS	2017		Yes (RLPSI Yld=0)	Yes	Agriculture and AgriFood Canada
R	LPSI	X-LPSI	None	BVC	Con	Weight-10	w(-1,-1,120,70)	122	GID-124	93.38	74.63	4.97	16.63	1349.28	AAC Castle	*AAC Castle	CPSR	2018		Yes using RLPSI (GPC=0)	Yes	Agriculture and AgriFood Canada
R	LPSI	X-LPSI	None	BVC	Con	Weight-10	w(-1,-1,120,70)	91	GID-092	89.62	78.83	4.4	17.37	1339.1	CDC VR Morris	*CDC VR Morris	CWRS	2012	Donor for Org	Yes (LPSI and RLPS Yld=0)	Yes	University of Saskatchewan
R	LPSI	X-LPSI	None	BVC	Con	Weight-10	w(-1,-1,120,70)	97	GID-099	91.71	84.45	5.16	16.36	1338.32	Conquer	*Conquer	CNHR	2010	Donor for Org	Yes (all 3 indexes)	Yes	Agriculture and AgriFood Canada
R	LPSI	X-LPSI	None	BVC	Con	Weight-10	w(-1,-1,120,70)	2	GID-002	89.61	84.79	4.86	16.7	1332.09	5605HR CL	*5605HR CL	CNHR	2013	Donor for Org	Yes (LPSI and RLPS Yld=0)	Yes	Syngenta Canada Inc.
R	LPSI	X-LPSI	None	BVC	Con	Weight-10	w(-1,-1,120,70)	7	GID-007	91.03	78.13	5.24	15.72	1314.02	AAC Brandon	*AAC Brandon	CWRS	2013	Donor for Org	Yes (all 3 indexes)	Yes	Agriculture and AgriFood Canada
R	LPSI	X-LPSI	None	BVC	Con	Weight-10	w(-1,-1,120,70)	62	GID-062	90.48	78.59	5.64	15.15	1313.9	AAC Goodwin	*AAC Goodwin	CPSR	2017	Donor for Org	Yes (all 3 indexes)	Yes	Agriculture and AgriFood Canada
R	LPSI	X-LPSI	None	BVC	Con	Weight-10	w(-1,-1,120,70)	187	GID-189	87.83	88.76	4.43	17.09	1313.61	SY479 VB	*SY479 VB	CWRS	2016		Yes (RLPSI Yld=0)	Yes	Syngenta Canada Inc.
R	LPSI	X-LPSI	None	BVC	Con	Weight-10	w(-1,-1,120,70)	68	GID-068	88.14	85.38	4.26	17.24	1311.74	BYT14-19	*BYT14-19	CWRS			Yes (RLPSI Yld=0)	Yes	University of Alberta
R	LPSI	X-LPSI	None	BVC	Con	Weight-10	w(-1,-1,120,70)	26	GID-026	86.84	89.35	4.48	16.86	1303.41	AC Cadillac	*AC Cadillac	CWRS	1996	Donor for Org	Yes (LPSI and RLPS Yld=0)	Yes	Farm Pure Seeds (ex SW Seed Canada Ltd)
R	LPSI	X-LPSI	None	BVC	Con	Weight-10	w(-1,-1,120,70)	179	GID-181	86.47	90.53	4.01	17.55	1302.69	Somerset	*Somerset	CWRS	2005	Donor for Org	Yes (LPSI and RLPS Yld=0)	Yes	Secan Association
R	LPSI	X-LPSI	None	BVC	Con	Weight-10	w(-1,-1,120,70)	156	GID-158	87.85	79.98	4.62	16.43	1300.45	AAC Tisdale	*AAC Tisdale	CWRS	2017		Yes (RLPSI Yld=0)	Yes	Agriculture and AgriFood Canada
R	LPSI	X-LPSI	None	BVC	Org	Weight-6	w(-1,-1,150,70)	97	GID-099	89.92	91.43	6.17	14.7	1247.72	Conquer	*Conquer	CNHR	2010	Donor for Org	Yes (all 3 indexes)	Yes	Agriculture and AgriFood Canada
R	LPSI	X-LPSI	None	BVC	Org	Weight-6	w(-1,-1,150,70)	62	GID-062	89	82.51	6	14.63	1239.26	AAC Goodwin	*AAC Goodwin	CPSR	2017	Donor for Org	Yes (all 3 indexes)	Yes	Agriculture and AgriFood Canada
R	LPSI	X-LPSI	None	BVC	Org	Weight-6	w(-1,-1,150,70)	179	GID-181	86.06	98.66	4.48	17.68	1238.2	Somerset	*Somerset	CWRS	2005	Donor for Org	Yes (LPSI and RLPS Yld=0)	Yes	Secan Association
R	LPSI	X-LPSI	None	BVC	Org	Weight-6	w(-1,-1,150,70)	78	GID-079	86.4	89.16	5.33	15.92	1236.59	CDC Imagine	*CDC Imagine	CWRS	2002	Donor for Org	Yes (all 3 indexes)	Yes	University of Saskatchewan
R	LPSI	X-LPSI	None	BVC	Org	Weight-6	w(-1,-1,150,70)	7	GID-007	88.69	79.6	5.38	15.49	1230.25	AAC Brandon	*AAC Brandon	CWRS	2013	Donor for Org	Yes (all 3 indexes)	Yes	Agriculture and AgriFood Canada
R	LPSI	X-LPSI	None	BVC	Org	Weight-6	w(-1,-1,150,70)	65	GID-065	84.69	95.53	5.5	15.62	1228.71	Zealand	*Zealand	CWRS	2016	Donor for Org	Yes (all 3 indexes)	Yes	University of Alberta
R	LPSI	X-LPSI	None	BVC	Org	Weight-6	w(-1,-1,150,70)	137	GID-139	85.25	88.64	5.07	16.18	1226.62	Lillian	*Lillian	CNHR	2003	Donor for Org	Yes (LPSI and RLPS Yld=0)	Yes	Secan Association
R	LPSI	X-LPSI	None	BVC	Org	Weight-6	w(-1,-1,150,70)	91	GID-092	87.78	86.05	4.57	16.98	1225.12	CDC VR Morris	*CDC VR Morris	CWRS	2012	Donor for Org	Yes (LPSI and RLPS Yld=0)	Yes	University of Saskatchewan
R	LPSI	X-LPSI	None	BVC	Org	Weight-6	w(-1,-1,150,70)	2	GID-002	88.36	89.58	5.17	15.93	1221.26	5605HR CL	*5605HR CL	CNHR	2013	Donor for Org	Yes (LPSI and RLPS Yld=0)	Yes	Syngenta Canada Inc.
R	LPSI	X-LPSI	None	BVC	Org	Weight-6	w(-1,-1,150,70)	26	GID-026	85.23	100.07	4.97	16.52	1220.84	AC Cadillac	*AC Cadillac	CWRS	1996	Donor for Org	Yes (LPSI and RLPS Yld=0)	Yes	Farm Pure Seeds (ex SW Seed Canada Ltd)
R	LPSI	X-LPSI	None	BVC	Org	Weight-6	w(-1,-1,150,70)	138	GID-140	86.53	95.28	5	16.33	1219.48	Lovitt	*Lovitt	CWRS	2002	Donor for Org	Yes (LPSI and RLPS Yld=0)	Yes	Canterra Seeds
R	LPSI	X-LPSI	None	BVC	Org	Weight-6	w(-1,-1,150,70)	21	GID-021	88.16	73.59	5.57	14.79	1218.47	AAC Viewfield	*AAC Viewfield	CWRS	2016	Donor for Org	Yes (all 3 indexes)	Yes	Agriculture and AgriFood Canada
R	LPSI	X-LPSI	None	BVC	Org	Weight-6	w(-1,-1,150,70)	74	GID-074	85.34	96.91	5.21	15.94	1216.54	CDC Alsask	*CDC Alsask	CWRS	2005	Donor for Org	Yes (LPSI and RLPS Yld=0)	Yes	University of Saskatchewan
R	LPSI	X-LPSI	None	BVC	Org	Weight-6	w(-1,-1,150,70)	88	GID-089	86.47	93.47	5.24	15.79	1215.63	CDC Thrive	*CDC Thrive	CWRS	2010	Donor for Org	Yes (LPSI and RLPS Yld=0)	Yes	University of Saskatchewan
R	LPSI	X-LPSI	None	BVC	Org	Weight-6	w(-1,-1,150,70)	111	GID-113	85.01	88.85	5.11	15.9	1215.18	Goodeve	*Goodeve	CWRS	2007	Donor for Org	Yes (LPSI and RLPS Yld=0)	Yes	Agriculture and AgriFood Canada
R	LPSI	X-LPSI	None	BVC	Org	Weight-6	w(-1,-1,150,70)	122	GID-124	90.27	77.72	5.53	14.78	1208.72	AAC Castle	*AAC Castle	CPSR	2018		Yes using RLPSI (GPC=0)	Yes	Agriculture and AgriFood Canada
R	LPSI	X-LPSI	None	BVC	Org	Weight-6	w(-1,-1,150,70)	16	GID-016	88.48	73.71	5.23	15.15	1205.33	AAC Penhold	*AAC Penhold	CPSR	2014		Yes using RLPSI (GPC=0)	Yes	Agriculture and AgriFood Canada
R	LPSI	X-LPSI	None	BVC	Org	Weight-6	w(-1,-1,150,70)	75	GID-076	85.92	99.71	5.04	16.07	1203.79	CDC Bounty	*CDC Bounty	CWRS	2000	Donor for Org	Yes (LPSI and RLPS Yld=0)	Yes	University of Saskatchewan
R	LPSI	X-LPSI	None	BVC	Org	Weight-6	w(-1,-1,150,70)	157	GID-159	83.18	93	5.01	15.95	1203.27	PT472	*PT472	CWRS		Donor for Org	Yes (LPSI and RLPS Yld=0)	Yes	Agriculture and AgriFood Canada
R	LPSI	X-LPSI	None	BVC	Org	Weight-7	w(-5,-1,150,70)	179	GID-181	86.06	98.66	4.48	17.68	965.518	Somerset	*Somerset	CWRS	2005	Donor for Org	Yes (LPSI and RLPS Yld=0)	Yes	Secan Association
R	LPSI	X-LPSI	None	BVC	Org	Weight-7	w(-5,-1,150,70)	78	GID-079	86.4	89.16	5.33	15.92	960.765	CDC Imagine	*CDC Imagine	CWRS	2002	Donor for Org	Yes (all 3 indexes)	Yes	University of Saskatchewan
R	LPSI	X-LPSI	None	BVC	Org	Weight-7	w(-5,-1,150,70)	97	GID-099	89.92	91.43	6.17	14.7	958.948	Conquer	*Conquer	CNHR	2010	Donor for Org	Yes (all 3 indexes)	Yes	Agriculture and AgriFood Canada
R	LPSI	X-LPSI	None	BVC	Org	Weight-7	w(-5,-1,150,70)	65	GID-065	84.69	95.53	5.5	15.62	958.392	Zealand	*Zealand	CWRS	2016	Donor for Org	Yes (all 3 indexes)	Yes	University of Alberta
R	LPSI	X-LPSI	None	BVC	Org	Weight-7	w(-5,-1,150,70)	137	GID-139	85.25	88.64	5.07	16.18	954.932	Lillian	*Lillian	CNHR	2003	Donor for Org	Yes (LPSI and RLPS Yld=0)	Yes	Secan Association
R	LPSI	X-LPSI	None	BVC	Org	Weight-7	w(-5,-1,150,70)	62	GID-062	89	82.51	6	14.63	953.348	AAC Goodwin	*AAC Goodwin	CPSR	2017	Donor for Org	Yes (all 3 indexes)	Yes	Agriculture and AgriFood Canada
R	LPSI	X-LPSI	None	BVC	Org	Weight-7	w(-5,-1,150,70)	26	GID-026	85.23	100.07	4.97	16.52	949.828	AC Cadillac	*AC Cadillac	CWRS	1996	Donor for Org	Yes (LPSI and RLPS Yld=0)	Yes	Farm Pure Seeds (ex SW Seed Canada Ltd)
R	LPSI	X-LPSI	None	BVC	Org	Weight-7	w(-5,-1,150,70)	7	GID-007	88.69	79.6	5.38	15.49	946.274	AAC Brandon	*AAC Brandon	CWRS	2013	Donor for Org	Yes (all 3 indexes)	Yes	Agriculture and AgriFood Canada
R	LPSI	X-LPSI	None	BVC	Org	Weight-7	w(-5,-1,150,70)	91	GID-092	87.78	86.05	4.57	16.98	945.878	CDC VR Morris	*CDC VR Morris	CWRS	2012	Donor for Org	Yes (LPSI and RLPS Yld=0)	Yes	University of Saskatchewan
R	LPSI	X-LPSI	None	BVC	Org	Weight-7	w(-5,-1,150,70)	74	GID-074	85.34	96.91	5.21	15.94	944.53	CDC Alsask	*CDC Alsask	CWRS	2005	Donor for Org	Yes (LPSI and RLPS Yld=0)	Yes	University of Saskatchewan
R	LPSI	X-LPSI	None	BVC	Org	Weight-7	w(-5,-1,150,70)	111	GID-113	85.01	88.85	5.11	15.9	944.075	Goodeve	*Goodeve	CWRS	2007	Donor for Org	Yes (LPSI and RLPS Yld=0)	Yes	Agriculture and AgriFood Canada
R	LPSI	X-LPSI	None	BVC	Org	Weight-7	w(-5,-1,150,70)	138	GID-140	86.53	95.28	5	16.33	943.895	Lovitt	*Lovitt	CWRS	2002	Donor for Org	Yes (LPSI and RLPS Yld=0)	Yes	Canterra Seeds
R	LPSI	X-LPSI	None	BVC	Org	Weight-7	w(-5,-1,150,70)	88	GID-089	86.47	93.47	5.24	15.79	939.666	CDC Thrive	*CDC Thrive	CWRS	2010	Donor for Org	Yes (LPSI and RLPS Yld=0)	Yes	University of Saskatchewan
R	LPSI	X-LPSI	None	BVC	Org	Weight-7	w(-5,-1,150,70)	2	GID-002	88.36	89.58	5.17	15.93	939.089	5605HR CL	*5605HR CL	CNHR	2013	Donor for Org	Yes (LPSI and RLPS Yld=0)	Yes	Syngenta Canada Inc.
R	LPSI	X-LPSI	None	BVC	Org	Weight-7	w(-5,-1,150,70)	157	GID-159	83.18	93	5.01	15.95	938.425	PT472	*PT472	CWRS		Donor for Org	Yes (LPSI and RLPS Yld=0)	Yes	Agriculture and AgriFood Canada
R	LPSI	X-LPSI	None	BVC	Org	Weight-7	w(-5,-1,150,70)	21	GID-021	88.16	73.59	5.57	14.79	935.475	AAC Viewfield	*AAC Viewfield	CWRS	2016	Donor for Org	Yes (all 3 indexes)	Yes	Agriculture and AgriFood Canada
R	LPSI	X-LPSI	None	BVC	Org	Weight-7	w(-5,-1,150,70)	75	GID-076	85.92	99.71	5.04	16.07	930.139	CDC Bounty	*CDC Bounty	CWRS	2000	Donor for Org	Yes (LPSI and RLPS Yld=0)	Yes	University of Saskatchewan
R	LPSI	X-LPSI	None	BVC	Org	Weight-7	w(-5,-1,150,70)	156	GID-158	85.01	84.15	5.02	15.68	929.519	AAC Tisdale	*AAC Tisdale	CWRS	2017		Yes (RLPSI Yld=0)	Yes	Agriculture and AgriFood Canada
R	LPSI	X-LPSI	None	BVC	Org	Weight-7	w(-5,-1,150,70)	187	GID-189	85.88	94.51	4.46	16.88	926.047	SY479 VB	*SY479 VB	CWRS	2016		Yes (RLPSI Yld=0)	Yes	Syngenta Canada Inc.
R	LPSI	X-LPSI	None	BVC	Org	Weight-8	w(-1,-1,130,70)	179	GID-181	86.06	98.66	4.48	17.68	1174.1	Somerset	*Somerset	CWRS	2005	Donor for Org	Yes (LPSI and RLPS Yld=0)	Yes	Secan Association
R	LPSI	X-LPSI	None	BVC	Org	Weight-8	w(-1,-1,130,70)	78	GID-079	86.4	89.16	5.33	15.92	1159.15	CDC Imagine	*CDC Imagine	CWRS	2002	Donor for Org	Yes (all 3 indexes)	Yes	University of Saskatchewan
R	LPSI	X-LPSI	None	BVC	Org	Weight-8	w(-1,-1,130,70)	97	GID-099	89.92	91.43	6.17	14.7	1158.08	Conquer	*Conquer	CNHR	2010	Donor for Org	Yes (all 3 indexes)	Yes	Agriculture and AgriFood Canada
R	LPSI	X-LPSI	None	BVC	Org	Weight-8	w(-1,-1,130,70)	91	GID-092	87.78	86.05	4.57	16.98	1156.7	CDC VR Morris	*CDC VR Morris	CWRS	2012	Donor for Org	Yes (LPSI and RLPS Yld=0)	Yes	University of Saskatchewan
R	LPSI	X-LPSI	None	BVC	Org	Weight-8	w(-1,-1,130,70)	137	GID-139	85.25	88.64	5.07	16.18	1152.95	Lillian	*Lillian	CNHR	2003	Donor for Org	Yes (LPSI and RLPS Yld=0)	Yes	Secan Association
R	LPSI	X-LPSI	None	BVC	Org	Weight-8	w(-1,-1,130,70)	65	GID-065	84.69	95.53	5.5	15.62	1150.73	Zealand	*Zealand	CWRS	2016	Donor for Org	Yes (all 3 indexes)	Yes	University of Alberta
R	LPSI	X-LPSI	None	BVC	Org	Weight-8	w(-1,-1,130,70)	62	GID-062	89	82.51	6	14.63	1150.58	AAC Goodwin	*AAC Goodwin	CPSR	2017	Donor for Org	Yes (all 3 indexes)	Yes	Agriculture and AgriFood Canada
R	LPSI	X-LPSI	None	BVC	Org	Weight-8	w(-1,-1,130,70)	26	GID-026	85.23	100.07	4.97	16.52	1150.54	AC Cadillac	*AC Cadillac	CWRS	1996	Donor for Org	Yes (LPSI and RLPS Yld=0)	Yes	Farm Pure Seeds (ex SW Seed Canada Ltd)
R	LPSI	X-LPSI	None	BVC	Org	Weight-8	w(-1,-1,130,70)	7	GID-007	88.69	79.6	5.38	15.49	1149.43	AAC Brandon	*AAC Brandon	CWRS	2013	Donor for Org	Yes (all 3 indexes)	Yes	Agriculture and AgriFood Canada
R	LPSI	X-LPSI	None	BVC	Org	Weight-8	w(-1,-1,130,70)	138	GID-140	86.53	95.28	5	16.33	1147.38	Lovitt	*Lovitt	CWRS	2002	Donor for Org	Yes (LPSI and RLPS Yld=0)	Yes	Canterra Seeds
R	LPSI	X-LPSI	None	BVC	Org	Weight-8	w(-1,-1,130,70)	2	GID-002	88.36	89.58	5.17	15.93	1145.12	5605HR CL	*5605HR CL	CNHR	2013	Donor for Org	Yes (LPSI and RLPS Yld=0)	Yes	Syngenta Canada Inc.
R	LPSI	X-LPSI	None	BVC	Org	Weight-8	w(-1,-1,130,70)	74	GID-074	85.34	96.91	5.21	15.94	1142.35	CDC Alsask	*CDC Alsask	CWRS	2005	Donor for Org	Yes (LPSI and RLPS Yld=0)	Yes	University of Saskatchewan
R	LPSI	X-LPSI	None	BVC	Org	Weight-8	w(-1,-1,130,70)	111	GID-113	85.01	88.85	5.11	15.9	1140.98	Goodeve	*Goodeve	CWRS	2007	Donor for Org	Yes (LPSI and RLPS Yld=0)	Yes	Agriculture and AgriFood Canada
R	LPSI	X-LPSI	None	BVC	Org	Weight-8	w(-1,-1,130,70)	88	GID-089	86.47	93.47	5.24	15.79	1139.94	CDC Thrive	*CDC Thrive	CWRS	2010	Donor for Org	Yes (LPSI and RLPS Yld=0)	Yes	University of Saskatchewan
R	LPSI	X-LPSI	None	BVC	Org	Weight-8	w(-1,-1,130,70)	21	GID-021	88.16	73.59	5.57	14.79	1134.08	AAC Viewfield	*AAC Viewfield	CWRS	2016	Donor for Org	Yes (all 3 indexes)	Yes	Agriculture and AgriFood Canada
R	LPSI	X-LPSI	None	BVC	Org	Weight-8	w(-1,-1,130,70)	187	GID-189	85.88	94.51	4.46	16.88	1133.86	SY479 VB	*SY479 VB	CWRS	2016		Yes (RLPSI Yld=0)	Yes	Syngenta Canada Inc.
R	LPSI	X-LPSI	None	BVC	Org	Weight-8	w(-1,-1,130,70)	75	GID-076	85.92	99.71	5.04	16.07	1132.03	CDC Bounty	*CDC Bounty	CWRS	2000	Donor for Org	Yes (LPSI and RLPS Yld=0)	Yes	University of Saskatchewan
R	LPSI	X-LPSI	None	BVC	Org	Weight-8	w(-1,-1,130,70)	157	GID-159	83.18	93	5.01	15.95	1131.78	PT472	*PT472	CWRS		Donor for Org	Yes (LPSI and RLPS Yld=0)	Yes	Agriculture and AgriFood Canada
R	LPSI	X-LPSI	None	BVC	Org	Weight-8	w(-1,-1,130,70)	156	GID-158	85.01	84.15	5.02	15.68	1126.86	AAC Tisdale	*AAC Tisdale	CWRS	2017		Yes (RLPSI Yld=0)	Yes	Agriculture and AgriFood Canada
R	LPSI	X-LPSI	None	BVC	Org	Weight-8	w(-1,-1,130,70)	68	GID-068	84.85	89.89	4.47	16.62	1126.21	BYT14-19	*BYT14-19	CWRS			Yes (RLPSI Yld=0)	Yes	University of Alberta
R	LPSI	X-LPSI	None	BVC	Org	Weight-9	w(-5,-1,130,70)	179	GID-181	86.06	98.66	4.48	17.68	901.415	Somerset	*Somerset	CWRS	2005	Donor for Org	Yes (LPSI and RLPS Yld=0)	Yes	Secan Association
R	LPSI	X-LPSI	None	BVC	Org	Weight-9	w(-5,-1,130,70)	78	GID-079	86.4	89.16	5.33	15.92	883.323	CDC Imagine	*CDC Imagine	CWRS	2002	Donor for Org	Yes (all 3 indexes)	Yes	University of Saskatchewan
R	LPSI	X-LPSI	None	BVC	Org	Weight-9	w(-5,-1,130,70)	137	GID-139	85.25	88.64	5.07	16.18	881.256	Lillian	*Lillian	CNHR	2003	Donor for Org	Yes (LPSI and RLPS Yld=0)	Yes	Secan Association
R	LPSI	X-LPSI	None	BVC	Org	Weight-9	w(-5,-1,130,70)	65	GID-065	84.69	95.53	5.5	15.62	880.414	Zealand	*Zealand	CWRS	2016	Donor for Org	Yes (all 3 indexes)	Yes	University of Alberta
R	LPSI	X-LPSI	None	BVC	Org	Weight-9	w(-5,-1,130,70)	26	GID-026	85.23	100.07	4.97	16.52	879.528	AC Cadillac	*AC Cadillac	CWRS	1996	Donor for Org	Yes (LPSI and RLPS Yld=0)	Yes	Farm Pure Seeds (ex SW Seed Canada Ltd)
R	LPSI	X-LPSI	None	BVC	Org	Weight-9	w(-5,-1,130,70)	91	GID-092	87.78	86.05	4.57	16.98	877.455	CDC VR Morris	*CDC VR Morris	CWRS	2012	Donor for Org	Yes (LPSI and RLPS Yld=0)	Yes	University of Saskatchewan
R	LPSI	X-LPSI	None	BVC	Org	Weight-9	w(-5,-1,130,70)	138	GID-140	86.53	95.28	5	16.33	871.791	Lovitt	*Lovitt	CWRS	2002	Donor for Org	Yes (LPSI and RLPS Yld=0)	Yes	Canterra Seeds
R	LPSI	X-LPSI	None	BVC	Org	Weight-9	w(-5,-1,130,70)	74	GID-074	85.34	96.91	5.21	15.94	870.333	CDC Alsask	*CDC Alsask	CWRS	2005	Donor for Org	Yes (LPSI and RLPS Yld=0)	Yes	University of Saskatchewan
R	LPSI	X-LPSI	None	BVC	Org	Weight-9	w(-5,-1,130,70)	111	GID-113	85.01	88.85	5.11	15.9	869.879	Goodeve	*Goodeve	CWRS	2007	Donor for Org	Yes (LPSI and RLPS Yld=0)	Yes	Agriculture and AgriFood Canada
R	LPSI	X-LPSI	None	BVC	Org	Weight-9	w(-5,-1,130,70)	97	GID-099	89.92	91.43	6.17	14.7	869.31	Conquer	*Conquer	CNHR	2010	Donor for Org	Yes (all 3 indexes)	Yes	Agriculture and AgriFood Canada
R	LPSI	X-LPSI	None	BVC	Org	Weight-9	w(-5,-1,130,70)	157	GID-159	83.18	93	5.01	15.95	866.937	PT472	*PT472	CWRS		Donor for Org	Yes (LPSI and RLPS Yld=0)	Yes	Agriculture and AgriFood Canada
R	LPSI	X-LPSI	None	BVC	Org	Weight-9	w(-5,-1,130,70)	7	GID-007	88.69	79.6	5.38	15.49	865.449	AAC Brandon	*AAC Brandon	CWRS	2013	Donor for Org	Yes (all 3 indexes)	Yes	Agriculture and AgriFood Canada
R	LPSI	X-LPSI	None	BVC	Org	Weight-9	w(-5,-1,130,70)	62	GID-062	89	82.51	6	14.63	864.66	AAC Goodwin	*AAC Goodwin	CPSR	2017	Donor for Org	Yes (all 3 indexes)	Yes	Agriculture and AgriFood Canada
R	LPSI	X-LPSI	None	BVC	Org	Weight-9	w(-5,-1,130,70)	88	GID-089	86.47	93.47	5.24	15.79	863.981	CDC Thrive	*CDC Thrive	CWRS	2010	Donor for Org	Yes (LPSI and RLPS Yld=0)	Yes	University of Saskatchewan
R	LPSI	X-LPSI	None	BVC	Org	Weight-9	w(-5,-1,130,70)	2	GID-002	88.36	89.58	5.17	15.93	862.95	5605HR CL	*5605HR CL	CNHR	2013	Donor for Org	Yes (LPSI and RLPS Yld=0)	Yes	Syngenta Canada Inc.
R	LPSI	X-LPSI	None	BVC	Org	Weight-9	w(-5,-1,130,70)	187	GID-189	85.88	94.51	4.46	16.88	861.133	SY479 VB	*SY479 VB	CWRS	2016		Yes (RLPSI Yld=0)	Yes	Syngenta Canada Inc.
R	LPSI	X-LPSI	None	BVC	Org	Weight-9	w(-5,-1,130,70)	75	GID-076	85.92	99.71	5.04	16.07	858.384	CDC Bounty	*CDC Bounty	CWRS	2000	Donor for Org	Yes (LPSI and RLPS Yld=0)	Yes	University of Saskatchewan
R	LPSI	X-LPSI	None	BVC	Org	Weight-9	w(-5,-1,130,70)	68	GID-068	84.85	89.89	4.47	16.62	856.572	BYT14-19	*BYT14-19	CWRS			Yes (RLPSI Yld=0)	Yes	University of Alberta
R	LPSI	X-LPSI	None	BVC	Org	Weight-9	w(-5,-1,130,70)	156	GID-158	85.01	84.15	5.02	15.68	855.537	AAC Tisdale	*AAC Tisdale	CWRS	2017		Yes (RLPSI Yld=0)	Yes	Agriculture and AgriFood Canada
R	LPSI	X-LPSI	None	BVC	Org	Weight-9	w(-5,-1,130,70)	21	GID-021	88.16	73.59	5.57	14.79	851.087	AAC Viewfield	*AAC Viewfield	CWRS	2016	Donor for Org	Yes (all 3 indexes)	Yes	Agriculture and AgriFood Canada
R	LPSI	X-LPSI	None	BVC	Org	Weight-10	w(-1,-1,120,70)	179	GID-181	86.06	98.66	4.48	17.68	1142.04	Somerset	*Somerset	CWRS	2005	Donor for Org	Yes (LPSI and RLPS Yld=0)	Yes	Secan Association
R	LPSI	X-LPSI	None	BVC	Org	Weight-10	w(-1,-1,120,70)	91	GID-092	87.78	86.05	4.57	16.98	1122.49	CDC VR Morris	*CDC VR Morris	CWRS	2012	Donor for Org	Yes (LPSI and RLPS Yld=0)	Yes	University of Saskatchewan
R	LPSI	X-LPSI	None	BVC	Org	Weight-10	w(-1,-1,120,70)	78	GID-079	86.4	89.16	5.33	15.92	1120.43	CDC Imagine	*CDC Imagine	CWRS	2002	Donor for Org	Yes (all 3 indexes)	Yes	University of Saskatchewan
R	LPSI	X-LPSI	None	BVC	Org	Weight-10	w(-1,-1,120,70)	137	GID-139	85.25	88.64	5.07	16.18	1116.11	Lillian	*Lillian	CNHR	2003	Donor for Org	Yes (LPSI and RLPS Yld=0)	Yes	Secan Association
R	LPSI	X-LPSI	None	BVC	Org	Weight-10	w(-1,-1,120,70)	26	GID-026	85.23	100.07	4.97	16.52	1115.39	AC Cadillac	*AC Cadillac	CWRS	1996	Donor for Org	Yes (LPSI and RLPS Yld=0)	Yes	Farm Pure Seeds (ex SW Seed Canada Ltd)
R	LPSI	X-LPSI	None	BVC	Org	Weight-10	w(-1,-1,120,70)	97	GID-099	89.92	91.43	6.17	14.7	1113.26	Conquer	*Conquer	CNHR	2010	Donor for Org	Yes (all 3 indexes)	Yes	Agriculture and AgriFood Canada
R	LPSI	X-LPSI	None	BVC	Org	Weight-10	w(-1,-1,120,70)	65	GID-065	84.69	95.53	5.5	15.62	1111.74	Zealand	*Zealand	CWRS	2016	Donor for Org	Yes (all 3 indexes)	Yes	University of Alberta
R	LPSI	X-LPSI	None	BVC	Org	Weight-10	w(-1,-1,120,70)	138	GID-140	86.53	95.28	5	16.33	1111.32	Lovitt	*Lovitt	CWRS	2002	Donor for Org	Yes (LPSI and RLPS Yld=0)	Yes	Canterra Seeds
R	LPSI	X-LPSI	None	BVC	Org	Weight-10	w(-1,-1,120,70)	7	GID-007	88.69	79.6	5.38	15.49	1109.01	AAC Brandon	*AAC Brandon	CWRS	2013	Donor for Org	Yes (all 3 indexes)	Yes	Agriculture and AgriFood Canada
R	LPSI	X-LPSI	None	BVC	Org	Weight-10	w(-1,-1,120,70)	2	GID-002	88.36	89.58	5.17	15.93	1107.05	5605HR CL	*5605HR CL	CNHR	2013	Donor for Org	Yes (LPSI and RLPS Yld=0)	Yes	Syngenta Canada Inc.
R	LPSI	X-LPSI	None	BVC	Org	Weight-10	w(-1,-1,120,70)	62	GID-062	89	82.51	6	14.63	1106.23	AAC Goodwin	*AAC Goodwin	CPSR	2017	Donor for Org	Yes (all 3 indexes)	Yes	Agriculture and AgriFood Canada
R	LPSI	X-LPSI	None	BVC	Org	Weight-10	w(-1,-1,120,70)	74	GID-074	85.34	96.91	5.21	15.94	1105.25	CDC Alsask	*CDC Alsask	CWRS	2005	Donor for Org	Yes (LPSI and RLPS Yld=0)	Yes	University of Saskatchewan
R	LPSI	X-LPSI	None	BVC	Org	Weight-10	w(-1,-1,120,70)	111	GID-113	85.01	88.85	5.11	15.9	1103.89	Goodeve	*Goodeve	CWRS	2007	Donor for Org	Yes (LPSI and RLPS Yld=0)	Yes	Agriculture and AgriFood Canada
R	LPSI	X-LPSI	None	BVC	Org	Weight-10	w(-1,-1,120,70)	88	GID-089	86.47	93.47	5.24	15.79	1102.1	CDC Thrive	*CDC Thrive	CWRS	2010	Donor for Org	Yes (LPSI and RLPS Yld=0)	Yes	University of Saskatchewan
R	LPSI	X-LPSI	None	BVC	Org	Weight-10	w(-1,-1,120,70)	187	GID-189	85.88	94.51	4.46	16.88	1101.4	SY479 VB	*SY479 VB	CWRS	2016		Yes (RLPSI Yld=0)	Yes	Syngenta Canada Inc.
R	LPSI	X-LPSI	None	BVC	Org	Weight-10	w(-1,-1,120,70)	75	GID-076	85.92	99.71	5.04	16.07	1096.16	CDC Bounty	*CDC Bounty	CWRS	2000	Donor for Org	Yes (LPSI and RLPS Yld=0)	Yes	University of Saskatchewan
R	LPSI	X-LPSI	None	BVC	Org	Weight-10	w(-1,-1,120,70)	157	GID-159	83.18	93	5.01	15.95	1096.04	PT472	*PT472	CWRS		Donor for Org	Yes (LPSI and RLPS Yld=0)	Yes	Agriculture and AgriFood Canada
R	LPSI	X-LPSI	None	BVC	Org	Weight-10	w(-1,-1,120,70)	68	GID-068	84.85	89.89	4.47	16.62	1093.43	BYT14-19	*BYT14-19	CWRS			Yes (RLPSI Yld=0)	Yes	University of Alberta
R	LPSI	X-LPSI	None	BVC	Org	Weight-10	w(-1,-1,120,70)	21	GID-021	88.16	73.59	5.57	14.79	1091.88	AAC Viewfield	*AAC Viewfield	CWRS	2016	Donor for Org	Yes (all 3 indexes)	Yes	Agriculture and AgriFood Canada
R	LPSI	X-LPSI	None	BVC	Org	Weight-10	w(-1,-1,120,70)	156	GID-158	85.01	84.15	5.02	15.68	1089.87	AAC Tisdale	*AAC Tisdale	CWRS	2017		Yes (RLPSI Yld=0)	Yes	Agriculture and AgriFood Canada
R	RLPSI (Yld restricted)	RLPSI (Yield=0)	Yield	BVC	Con	Weight-6	w(-1,-1,150,70)	122	GID-124	93.38	74.63	4.97	16.63	1301.37	AAC Castle	*AAC Castle	CPSR	2018		Yes using RLPSI (GPC=0)	Yes	Agriculture and AgriFood Canada
R	RLPSI (Yld restricted)	RLPSI (Yield=0)	Yield	BVC	Con	Weight-6	w(-1,-1,150,70)	91	GID-092	89.62	78.83	4.4	17.37	1296.55	CDC VR Morris	*CDC VR Morris	CWRS	2012	Donor for Org	Yes (LPSI and RLPS Yld=0)	Yes	University of Saskatchewan
R	RLPSI (Yld restricted)	RLPSI (Yield=0)	Yield	BVC	Con	Weight-6	w(-1,-1,150,70)	97	GID-099	91.71	84.45	5.16	16.36	1290.09	Conquer	*Conquer	CNHR	2010	Donor for Org	Yes (all 3 indexes)	Yes	Agriculture and AgriFood Canada
R	RLPSI (Yld restricted)	RLPSI (Yield=0)	Yield	BVC	Con	Weight-6	w(-1,-1,150,70)	2	GID-002	89.61	84.79	4.86	16.7	1286.57	5605HR CL	*5605HR CL	CNHR	2013	Donor for Org	Yes (LPSI and RLPS Yld=0)	Yes	Syngenta Canada Inc.
R	RLPSI (Yld restricted)	RLPSI (Yield=0)	Yield	BVC	Con	Weight-6	w(-1,-1,150,70)	187	GID-189	87.83	88.76	4.43	17.09	1271.91	SY479 VB	*SY479 VB	CWRS	2016		Yes (RLPSI Yld=0)	Yes	Syngenta Canada Inc.
R	RLPSI (Yld restricted)	RLPSI (Yield=0)	Yield	BVC	Con	Weight-6	w(-1,-1,150,70)	68	GID-068	88.14	85.38	4.26	17.24	1270.96	BYT14-19	*BYT14-19	CWRS			Yes (RLPSI Yld=0)	Yes	University of Alberta
R	RLPSI (Yld restricted)	RLPSI (Yield=0)	Yield	BVC	Con	Weight-6	w(-1,-1,150,70)	7	GID-007	91.03	78.13	5.24	15.72	1264.8	AAC Brandon	*AAC Brandon	CWRS	2013	Donor for Org	Yes (all 3 indexes)	Yes	Agriculture and AgriFood Canada
R	RLPSI (Yld restricted)	RLPSI (Yield=0)	Yield	BVC	Con	Weight-6	w(-1,-1,150,70)	179	GID-181	86.47	90.53	4.01	17.55	1264.5	Somerset	*Somerset	CWRS	2005	Donor for Org	Yes (LPSI and RLPS Yld=0)	Yes	Secan Association
R	RLPSI (Yld restricted)	RLPSI (Yield=0)	Yield	BVC	Con	Weight-6	w(-1,-1,150,70)	62	GID-062	90.48	78.59	5.64	15.15	1261.88	AAC Goodwin	*AAC Goodwin	CPSR	2017	Donor for Org	Yes (all 3 indexes)	Yes	Agriculture and AgriFood Canada
R	RLPSI (Yld restricted)	RLPSI (Yield=0)	Yield	BVC	Con	Weight-6	w(-1,-1,150,70)	26	GID-026	86.84	89.35	4.48	16.86	1261.57	AC Cadillac	*AC Cadillac	CWRS	1996	Donor for Org	Yes (LPSI and RLPS Yld=0)	Yes	Farm Pure Seeds (ex SW Seed Canada Ltd)
R	RLPSI (Yld restricted)	RLPSI (Yield=0)	Yield	BVC	Con	Weight-6	w(-1,-1,150,70)	156	GID-158	87.85	79.98	4.62	16.43	1256.64	AAC Tisdale	*AAC Tisdale	CWRS	2017		Yes (RLPSI Yld=0)	Yes	Agriculture and AgriFood Canada
R	RLPSI (Yld restricted)	RLPSI (Yield=0)	Yield	BVC	Con	Weight-7	w(-5,-1,150,70)	91	GID-092	89.62	78.83	4.4	17.37	1047.13	CDC VR Morris	*CDC VR Morris	CWRS	2012	Donor for Org	Yes (LPSI and RLPS Yld=0)	Yes	University of Saskatchewan
R	RLPSI (Yld restricted)	RLPSI (Yield=0)	Yield	BVC	Con	Weight-7	w(-5,-1,150,70)	122	GID-124	93.38	74.63	4.97	16.63	1046.64	AAC Castle	*AAC Castle	CPSR	2018		Yes using RLPSI (GPC=0)	Yes	Agriculture and AgriFood Canada
R	RLPSI (Yld restricted)	RLPSI (Yield=0)	Yield	BVC	Con	Weight-7	w(-5,-1,150,70)	97	GID-099	91.71	84.45	5.16	16.36	1041.54	Conquer	*Conquer	CNHR	2010	Donor for Org	Yes (all 3 indexes)	Yes	Agriculture and AgriFood Canada
R	RLPSI (Yld restricted)	RLPSI (Yield=0)	Yield	BVC	Con	Weight-7	w(-5,-1,150,70)	2	GID-002	89.61	84.79	4.86	16.7	1041.43	5605HR CL	*5605HR CL	CNHR	2013	Donor for Org	Yes (LPSI and RLPS Yld=0)	Yes	Syngenta Canada Inc.
R	RLPSI (Yld restricted)	RLPSI (Yield=0)	Yield	BVC	Con	Weight-7	w(-5,-1,150,70)	187	GID-189	87.83	88.76	4.43	17.09	1027.31	SY479 VB	*SY479 VB	CWRS	2016		Yes (RLPSI Yld=0)	Yes	Syngenta Canada Inc.
R	RLPSI (Yld restricted)	RLPSI (Yield=0)	Yield	BVC	Con	Weight-7	w(-5,-1,150,70)	68	GID-068	88.14	85.38	4.26	17.24	1023.94	BYT14-19	*BYT14-19	CWRS			Yes (RLPSI Yld=0)	Yes	University of Alberta
R	RLPSI (Yld restricted)	RLPSI (Yield=0)	Yield	BVC	Con	Weight-7	w(-5,-1,150,70)	62	GID-062	90.48	78.59	5.64	15.15	1023.23	AAC Goodwin	*AAC Goodwin	CPSR	2017	Donor for Org	Yes (all 3 indexes)	Yes	Agriculture and AgriFood Canada
R	RLPSI (Yld restricted)	RLPSI (Yield=0)	Yield	BVC	Con	Weight-7	w(-5,-1,150,70)	26	GID-026	86.84	89.35	4.48	16.86	1020.61	AC Cadillac	*AC Cadillac	CWRS	1996	Donor for Org	Yes (LPSI and RLPS Yld=0)	Yes	Farm Pure Seeds (ex SW Seed Canada Ltd)
R	RLPSI (Yld restricted)	RLPSI (Yield=0)	Yield	BVC	Con	Weight-7	w(-5,-1,150,70)	7	GID-007	91.03	78.13	5.24	15.72	1020.1	AAC Brandon	*AAC Brandon	CWRS	2013	Donor for Org	Yes (all 3 indexes)	Yes	Agriculture and AgriFood Canada
R	RLPSI (Yld restricted)	RLPSI (Yield=0)	Yield	BVC	Con	Weight-7	w(-5,-1,150,70)	179	GID-181	86.47	90.53	4.01	17.55	1019.47	Somerset	*Somerset	CWRS	2005	Donor for Org	Yes (LPSI and RLPS Yld=0)	Yes	Secan Association
R	RLPSI (Yld restricted)	RLPSI (Yield=0)	Yield	BVC	Con	Weight-7	w(-5,-1,150,70)	156	GID-158	87.85	79.98	4.62	16.43	1015.14	AAC Tisdale	*AAC Tisdale	CWRS	2017		Yes (RLPSI Yld=0)	Yes	Agriculture and AgriFood Canada
R	RLPSI (Yld restricted)	RLPSI (Yield=0)	Yield	BVC	Con	Weight-8	w(-1,-1,130,70)	122	GID-124	93.38	74.63	4.97	16.63	1301.37	AAC Castle	*AAC Castle	CPSR	2018		Yes using RLPSI (GPC=0)	Yes	Agriculture and AgriFood Canada
R	RLPSI (Yld restricted)	RLPSI (Yield=0)	Yield	BVC	Con	Weight-8	w(-1,-1,130,70)	91	GID-092	89.62	78.83	4.4	17.37	1296.55	CDC VR Morris	*CDC VR Morris	CWRS	2012	Donor for Org	Yes (LPSI and RLPS Yld=0)	Yes	University of Saskatchewan
R	RLPSI (Yld restricted)	RLPSI (Yield=0)	Yield	BVC	Con	Weight-8	w(-1,-1,130,70)	97	GID-099	91.71	84.45	5.16	16.36	1290.09	Conquer	*Conquer	CNHR	2010	Donor for Org	Yes (all 3 indexes)	Yes	Agriculture and AgriFood Canada
R	RLPSI (Yld restricted)	RLPSI (Yield=0)	Yield	BVC	Con	Weight-8	w(-1,-1,130,70)	2	GID-002	89.61	84.79	4.86	16.7	1286.57	5605HR CL	*5605HR CL	CNHR	2013	Donor for Org	Yes (LPSI and RLPS Yld=0)	Yes	Syngenta Canada Inc.
R	RLPSI (Yld restricted)	RLPSI (Yield=0)	Yield	BVC	Con	Weight-8	w(-1,-1,130,70)	187	GID-189	87.83	88.76	4.43	17.09	1271.91	SY479 VB	*SY479 VB	CWRS	2016		Yes (RLPSI Yld=0)	Yes	Syngenta Canada Inc.
R	RLPSI (Yld restricted)	RLPSI (Yield=0)	Yield	BVC	Con	Weight-8	w(-1,-1,130,70)	68	GID-068	88.14	85.38	4.26	17.24	1270.96	BYT14-19	*BYT14-19	CWRS			Yes (RLPSI Yld=0)	Yes	University of Alberta
R	RLPSI (Yld restricted)	RLPSI (Yield=0)	Yield	BVC	Con	Weight-8	w(-1,-1,130,70)	7	GID-007	91.03	78.13	5.24	15.72	1264.8	AAC Brandon	*AAC Brandon	CWRS	2013	Donor for Org	Yes (all 3 indexes)	Yes	Agriculture and AgriFood Canada
R	RLPSI (Yld restricted)	RLPSI (Yield=0)	Yield	BVC	Con	Weight-8	w(-1,-1,130,70)	179	GID-181	86.47	90.53	4.01	17.55	1264.5	Somerset	*Somerset	CWRS	2005	Donor for Org	Yes (LPSI and RLPS Yld=0)	Yes	Secan Association
R	RLPSI (Yld restricted)	RLPSI (Yield=0)	Yield	BVC	Con	Weight-8	w(-1,-1,130,70)	62	GID-062	90.48	78.59	5.64	15.15	1261.88	AAC Goodwin	*AAC Goodwin	CPSR	2017	Donor for Org	Yes (all 3 indexes)	Yes	Agriculture and AgriFood Canada
R	RLPSI (Yld restricted)	RLPSI (Yield=0)	Yield	BVC	Con	Weight-8	w(-1,-1,130,70)	26	GID-026	86.84	89.35	4.48	16.86	1261.57	AC Cadillac	*AC Cadillac	CWRS	1996	Donor for Org	Yes (LPSI and RLPS Yld=0)	Yes	Farm Pure Seeds (ex SW Seed Canada Ltd)
R	RLPSI (Yld restricted)	RLPSI (Yield=0)	Yield	BVC	Con	Weight-8	w(-1,-1,130,70)	156	GID-158	87.85	79.98	4.62	16.43	1256.64	AAC Tisdale	*AAC Tisdale	CWRS	2017		Yes (RLPSI Yld=0)	Yes	Agriculture and AgriFood Canada
R	RLPSI (Yld restricted)	RLPSI (Yield=0)	Yield	BVC	Con	Weight-9	w(-5,-1,130,70)	91	GID-092	89.62	78.83	4.4	17.37	1047.13	CDC VR Morris	*CDC VR Morris	CWRS	2012	Donor for Org	Yes (LPSI and RLPS Yld=0)	Yes	University of Saskatchewan
R	RLPSI (Yld restricted)	RLPSI (Yield=0)	Yield	BVC	Con	Weight-9	w(-5,-1,130,70)	122	GID-124	93.38	74.63	4.97	16.63	1046.64	AAC Castle	*AAC Castle	CPSR	2018		Yes using RLPSI (GPC=0)	Yes	Agriculture and AgriFood Canada
R	RLPSI (Yld restricted)	RLPSI (Yield=0)	Yield	BVC	Con	Weight-9	w(-5,-1,130,70)	97	GID-099	91.71	84.45	5.16	16.36	1041.54	Conquer	*Conquer	CNHR	2010	Donor for Org	Yes (all 3 indexes)	Yes	Agriculture and AgriFood Canada
R	RLPSI (Yld restricted)	RLPSI (Yield=0)	Yield	BVC	Con	Weight-9	w(-5,-1,130,70)	2	GID-002	89.61	84.79	4.86	16.7	1041.43	5605HR CL	*5605HR CL	CNHR	2013	Donor for Org	Yes (LPSI and RLPS Yld=0)	Yes	Syngenta Canada Inc.
R	RLPSI (Yld restricted)	RLPSI (Yield=0)	Yield	BVC	Con	Weight-9	w(-5,-1,130,70)	187	GID-189	87.83	88.76	4.43	17.09	1027.31	SY479 VB	*SY479 VB	CWRS	2016		Yes (RLPSI Yld=0)	Yes	Syngenta Canada Inc.
R	RLPSI (Yld restricted)	RLPSI (Yield=0)	Yield	BVC	Con	Weight-9	w(-5,-1,130,70)	68	GID-068	88.14	85.38	4.26	17.24	1023.94	BYT14-19	*BYT14-19	CWRS			Yes (RLPSI Yld=0)	Yes	University of Alberta
R	RLPSI (Yld restricted)	RLPSI (Yield=0)	Yield	BVC	Con	Weight-9	w(-5,-1,130,70)	62	GID-062	90.48	78.59	5.64	15.15	1023.23	AAC Goodwin	*AAC Goodwin	CPSR	2017	Donor for Org	Yes (all 3 indexes)	Yes	Agriculture and AgriFood Canada
R	RLPSI (Yld restricted)	RLPSI (Yield=0)	Yield	BVC	Con	Weight-9	w(-5,-1,130,70)	26	GID-026	86.84	89.35	4.48	16.86	1020.61	AC Cadillac	*AC Cadillac	CWRS	1996	Donor for Org	Yes (LPSI and RLPS Yld=0)	Yes	Farm Pure Seeds (ex SW Seed Canada Ltd)
R	RLPSI (Yld restricted)	RLPSI (Yield=0)	Yield	BVC	Con	Weight-9	w(-5,-1,130,70)	7	GID-007	91.03	78.13	5.24	15.72	1020.1	AAC Brandon	*AAC Brandon	CWRS	2013	Donor for Org	Yes (all 3 indexes)	Yes	Agriculture and AgriFood Canada
R	RLPSI (Yld restricted)	RLPSI (Yield=0)	Yield	BVC	Con	Weight-9	w(-5,-1,130,70)	179	GID-181	86.47	90.53	4.01	17.55	1019.47	Somerset	*Somerset	CWRS	2005	Donor for Org	Yes (LPSI and RLPS Yld=0)	Yes	Secan Association
R	RLPSI (Yld restricted)	RLPSI (Yield=0)	Yield	BVC	Con	Weight-9	w(-5,-1,130,70)	156	GID-158	87.85	79.98	4.62	16.43	1015.14	AAC Tisdale	*AAC Tisdale	CWRS	2017		Yes (RLPSI Yld=0)	Yes	Agriculture and AgriFood Canada
R	RLPSI (Yld restricted)	RLPSI (Yield=0)	Yield	BVC	Con	Weight-10	w(-1,-1,120,70)	122	GID-124	93.38	74.63	4.97	16.63	1301.37	AAC Castle	*AAC Castle	CPSR	2018		Yes using RLPSI (GPC=0)	Yes	Agriculture and AgriFood Canada
R	RLPSI (Yld restricted)	RLPSI (Yield=0)	Yield	BVC	Con	Weight-10	w(-1,-1,120,70)	91	GID-092	89.62	78.83	4.4	17.37	1296.55	CDC VR Morris	*CDC VR Morris	CWRS	2012	Donor for Org	Yes (LPSI and RLPS Yld=0)	Yes	University of Saskatchewan
R	RLPSI (Yld restricted)	RLPSI (Yield=0)	Yield	BVC	Con	Weight-10	w(-1,-1,120,70)	97	GID-099	91.71	84.45	5.16	16.36	1290.09	Conquer	*Conquer	CNHR	2010	Donor for Org	Yes (all 3 indexes)	Yes	Agriculture and AgriFood Canada
R	RLPSI (Yld restricted)	RLPSI (Yield=0)	Yield	BVC	Con	Weight-10	w(-1,-1,120,70)	2	GID-002	89.61	84.79	4.86	16.7	1286.57	5605HR CL	*5605HR CL	CNHR	2013	Donor for Org	Yes (LPSI and RLPS Yld=0)	Yes	Syngenta Canada Inc.
R	RLPSI (Yld restricted)	RLPSI (Yield=0)	Yield	BVC	Con	Weight-10	w(-1,-1,120,70)	187	GID-189	87.83	88.76	4.43	17.09	1271.91	SY479 VB	*SY479 VB	CWRS	2016		Yes (RLPSI Yld=0)	Yes	Syngenta Canada Inc.
R	RLPSI (Yld restricted)	RLPSI (Yield=0)	Yield	BVC	Con	Weight-10	w(-1,-1,120,70)	68	GID-068	88.14	85.38	4.26	17.24	1270.96	BYT14-19	*BYT14-19	CWRS			Yes (RLPSI Yld=0)	Yes	University of Alberta
R	RLPSI (Yld restricted)	RLPSI (Yield=0)	Yield	BVC	Con	Weight-10	w(-1,-1,120,70)	7	GID-007	91.03	78.13	5.24	15.72	1264.8	AAC Brandon	*AAC Brandon	CWRS	2013	Donor for Org	Yes (all 3 indexes)	Yes	Agriculture and AgriFood Canada
R	RLPSI (Yld restricted)	RLPSI (Yield=0)	Yield	BVC	Con	Weight-10	w(-1,-1,120,70)	179	GID-181	86.47	90.53	4.01	17.55	1264.5	Somerset	*Somerset	CWRS	2005	Donor for Org	Yes (LPSI and RLPS Yld=0)	Yes	Secan Association
R	RLPSI (Yld restricted)	RLPSI (Yield=0)	Yield	BVC	Con	Weight-10	w(-1,-1,120,70)	62	GID-062	90.48	78.59	5.64	15.15	1261.88	AAC Goodwin	*AAC Goodwin	CPSR	2017	Donor for Org	Yes (all 3 indexes)	Yes	Agriculture and AgriFood Canada
R	RLPSI (Yld restricted)	RLPSI (Yield=0)	Yield	BVC	Con	Weight-10	w(-1,-1,120,70)	26	GID-026	86.84	89.35	4.48	16.86	1261.57	AC Cadillac	*AC Cadillac	CWRS	1996	Donor for Org	Yes (LPSI and RLPS Yld=0)	Yes	Farm Pure Seeds (ex SW Seed Canada Ltd)
R	RLPSI (Yld restricted)	RLPSI (Yield=0)	Yield	BVC	Con	Weight-10	w(-1,-1,120,70)	156	GID-158	87.85	79.98	4.62	16.43	1256.64	AAC Tisdale	*AAC Tisdale	CWRS	2017		Yes (RLPSI Yld=0)	Yes	Agriculture and AgriFood Canada
R	RLPSI (Yld restricted)	RLPSI (Yield=0)	Yield	BVC	Org	Weight-6	w(-1,-1,150,70)	179	GID-181	86.06	98.66	4.48	17.68	1153.35	Somerset	*Somerset	CWRS	2005	Donor for Org	Yes (LPSI and RLPS Yld=0)	Yes	Secan Association
R	RLPSI (Yld restricted)	RLPSI (Yield=0)	Yield	BVC	Org	Weight-6	w(-1,-1,150,70)	91	GID-092	87.78	86.05	4.57	16.98	1134.55	CDC VR Morris	*CDC VR Morris	CWRS	2012	Donor for Org	Yes (LPSI and RLPS Yld=0)	Yes	University of Saskatchewan
R	RLPSI (Yld restricted)	RLPSI (Yield=0)	Yield	BVC	Org	Weight-6	w(-1,-1,150,70)	78	GID-079	86.4	89.16	5.33	15.92	1134.08	CDC Imagine	*CDC Imagine	CWRS	2002	Donor for Org	Yes (all 3 indexes)	Yes	University of Saskatchewan
R	RLPSI (Yld restricted)	RLPSI (Yield=0)	Yield	BVC	Org	Weight-6	w(-1,-1,150,70)	137	GID-139	85.25	88.64	5.07	16.18	1129.1	Lillian	*Lillian	CNHR	2003	Donor for Org	Yes (LPSI and RLPS Yld=0)	Yes	Secan Association
R	RLPSI (Yld restricted)	RLPSI (Yield=0)	Yield	BVC	Org	Weight-6	w(-1,-1,150,70)	97	GID-099	89.92	91.43	6.17	14.7	1129.07	Conquer	*Conquer	CNHR	2010	Donor for Org	Yes (all 3 indexes)	Yes	Agriculture and AgriFood Canada
R	RLPSI (Yld restricted)	RLPSI (Yield=0)	Yield	BVC	Org	Weight-6	w(-1,-1,150,70)	26	GID-026	85.23	100.07	4.97	16.52	1127.78	AC Cadillac	*AC Cadillac	CWRS	1996	Donor for Org	Yes (LPSI and RLPS Yld=0)	Yes	Farm Pure Seeds (ex SW Seed Canada Ltd)
R	RLPSI (Yld restricted)	RLPSI (Yield=0)	Yield	BVC	Org	Weight-6	w(-1,-1,150,70)	65	GID-065	84.69	95.53	5.5	15.62	1125.49	Zealand	*Zealand	CWRS	2016	Donor for Org	Yes (all 3 indexes)	Yes	University of Alberta
R	RLPSI (Yld restricted)	RLPSI (Yield=0)	Yield	BVC	Org	Weight-6	w(-1,-1,150,70)	138	GID-140	86.53	95.28	5	16.33	1124.04	Lovitt	*Lovitt	CWRS	2002	Donor for Org	Yes (LPSI and RLPS Yld=0)	Yes	Canterra Seeds
R	RLPSI (Yld restricted)	RLPSI (Yield=0)	Yield	BVC	Org	Weight-6	w(-1,-1,150,70)	7	GID-007	88.69	79.6	5.38	15.49	1123.26	AAC Brandon	*AAC Brandon	CWRS	2013	Donor for Org	Yes (all 3 indexes)	Yes	Agriculture and AgriFood Canada
R	RLPSI (Yld restricted)	RLPSI (Yield=0)	Yield	BVC	Org	Weight-6	w(-1,-1,150,70)	62	GID-062	89	82.51	6	14.63	1121.87	AAC Goodwin	*AAC Goodwin	CPSR	2017	Donor for Org	Yes (all 3 indexes)	Yes	Agriculture and AgriFood Canada
R	RLPSI (Yld restricted)	RLPSI (Yield=0)	Yield	BVC	Org	Weight-6	w(-1,-1,150,70)	2	GID-002	88.36	89.58	5.17	15.93	1120.48	5605HR CL	*5605HR CL	CNHR	2013	Donor for Org	Yes (LPSI and RLPS Yld=0)	Yes	Syngenta Canada Inc.
R	RLPSI (Yld restricted)	RLPSI (Yield=0)	Yield	BVC	Org	Weight-6	w(-1,-1,150,70)	74	GID-074	85.34	96.91	5.21	15.94	1118.33	CDC Alsask	*CDC Alsask	CWRS	2005	Donor for Org	Yes (LPSI and RLPS Yld=0)	Yes	University of Saskatchewan
R	RLPSI (Yld restricted)	RLPSI (Yield=0)	Yield	BVC	Org	Weight-6	w(-1,-1,150,70)	111	GID-113	85.01	88.85	5.11	15.9	1116.97	Goodeve	*Goodeve	CWRS	2007	Donor for Org	Yes (LPSI and RLPS Yld=0)	Yes	Agriculture and AgriFood Canada
R	RLPSI (Yld restricted)	RLPSI (Yield=0)	Yield	BVC	Org	Weight-6	w(-1,-1,150,70)	88	GID-089	86.47	93.47	5.24	15.79	1115.45	CDC Thrive	*CDC Thrive	CWRS	2010	Donor for Org	Yes (LPSI and RLPS Yld=0)	Yes	University of Saskatchewan
R	RLPSI (Yld restricted)	RLPSI (Yield=0)	Yield	BVC	Org	Weight-6	w(-1,-1,150,70)	187	GID-189	85.88	94.51	4.46	16.88	1112.85	SY479 VB	*SY479 VB	CWRS	2016		Yes (RLPSI Yld=0)	Yes	Syngenta Canada Inc.
R	RLPSI (Yld restricted)	RLPSI (Yield=0)	Yield	BVC	Org	Weight-6	w(-1,-1,150,70)	75	GID-076	85.92	99.71	5.04	16.07	1108.81	CDC Bounty	*CDC Bounty	CWRS	2000	Donor for Org	Yes (LPSI and RLPS Yld=0)	Yes	University of Saskatchewan
R	RLPSI (Yld restricted)	RLPSI (Yield=0)	Yield	BVC	Org	Weight-6	w(-1,-1,150,70)	157	GID-159	83.18	93	5.01	15.95	1108.64	PT472	*PT472	CWRS		Donor for Org	Yes (LPSI and RLPS Yld=0)	Yes	Agriculture and AgriFood Canada
R	RLPSI (Yld restricted)	RLPSI (Yield=0)	Yield	BVC	Org	Weight-6	w(-1,-1,150,70)	21	GID-021	88.16	73.59	5.57	14.79	1106.76	AAC Viewfield	*AAC Viewfield	CWRS	2016	Donor for Org	Yes (all 3 indexes)	Yes	Agriculture and AgriFood Canada
R	RLPSI (Yld restricted)	RLPSI (Yield=0)	Yield	BVC	Org	Weight-6	w(-1,-1,150,70)	68	GID-068	84.85	89.89	4.47	16.62	1104.99	BYT14-19	*BYT14-19	CWRS			Yes (RLPSI Yld=0)	Yes	University of Alberta
R	RLPSI (Yld restricted)	RLPSI (Yield=0)	Yield	BVC	Org	Weight-6	w(-1,-1,150,70)	156	GID-158	85.01	84.15	5.02	15.68	1102.91	AAC Tisdale	*AAC Tisdale	CWRS	2017		Yes (RLPSI Yld=0)	Yes	Agriculture and AgriFood Canada
R	RLPSI (Yld restricted)	RLPSI (Yield=0)	Yield	BVC	Org	Weight-7	w(-5,-1,150,70)	179	GID-181	86.06	98.66	4.48	17.68	932.945	Somerset	*Somerset	CWRS	2005	Donor for Org	Yes (LPSI and RLPS Yld=0)	Yes	Secan Association
R	RLPSI (Yld restricted)	RLPSI (Yield=0)	Yield	BVC	Org	Weight-7	w(-5,-1,150,70)	78	GID-079	86.4	89.16	5.33	15.92	921.414	CDC Imagine	*CDC Imagine	CWRS	2002	Donor for Org	Yes (all 3 indexes)	Yes	University of Saskatchewan
R	RLPSI (Yld restricted)	RLPSI (Yield=0)	Yield	BVC	Org	Weight-7	w(-5,-1,150,70)	65	GID-065	84.69	95.53	5.5	15.62	918.769	Zealand	*Zealand	CWRS	2016	Donor for Org	Yes (all 3 indexes)	Yes	University of Alberta
R	RLPSI (Yld restricted)	RLPSI (Yield=0)	Yield	BVC	Org	Weight-7	w(-5,-1,150,70)	137	GID-139	85.25	88.64	5.07	16.18	917.495	Lillian	*Lillian	CNHR	2003	Donor for Org	Yes (LPSI and RLPS Yld=0)	Yes	Secan Association
R	RLPSI (Yld restricted)	RLPSI (Yield=0)	Yield	BVC	Org	Weight-7	w(-5,-1,150,70)	26	GID-026	85.23	100.07	4.97	16.52	914.106	AC Cadillac	*AC Cadillac	CWRS	1996	Donor for Org	Yes (LPSI and RLPS Yld=0)	Yes	Farm Pure Seeds (ex SW Seed Canada Ltd)
R	RLPSI (Yld restricted)	RLPSI (Yield=0)	Yield	BVC	Org	Weight-7	w(-5,-1,150,70)	97	GID-099	89.92	91.43	6.17	14.7	913.4	Conquer	*Conquer	CNHR	2010	Donor for Org	Yes (all 3 indexes)	Yes	Agriculture and AgriFood Canada
R	RLPSI (Yld restricted)	RLPSI (Yield=0)	Yield	BVC	Org	Weight-7	w(-5,-1,150,70)	91	GID-092	87.78	86.05	4.57	16.98	911.11	CDC VR Morris	*CDC VR Morris	CWRS	2012	Donor for Org	Yes (LPSI and RLPS Yld=0)	Yes	University of Saskatchewan
R	RLPSI (Yld restricted)	RLPSI (Yield=0)	Yield	BVC	Org	Weight-7	w(-5,-1,150,70)	62	GID-062	89	82.51	6	14.63	908.282	AAC Goodwin	*AAC Goodwin	CPSR	2017	Donor for Org	Yes (all 3 indexes)	Yes	Agriculture and AgriFood Canada
R	RLPSI (Yld restricted)	RLPSI (Yield=0)	Yield	BVC	Org	Weight-7	w(-5,-1,150,70)	138	GID-140	86.53	95.28	5	16.33	907.257	Lovitt	*Lovitt	CWRS	2002	Donor for Org	Yes (LPSI and RLPS Yld=0)	Yes	Canterra Seeds
R	RLPSI (Yld restricted)	RLPSI (Yield=0)	Yield	BVC	Org	Weight-7	w(-5,-1,150,70)	74	GID-074	85.34	96.91	5.21	15.94	906.828	CDC Alsask	*CDC Alsask	CWRS	2005	Donor for Org	Yes (LPSI and RLPS Yld=0)	Yes	University of Saskatchewan
R	RLPSI (Yld restricted)	RLPSI (Yield=0)	Yield	BVC	Org	Weight-7	w(-5,-1,150,70)	111	GID-113	85.01	88.85	5.11	15.9	906.373	Goodeve	*Goodeve	CWRS	2007	Donor for Org	Yes (LPSI and RLPS Yld=0)	Yes	Agriculture and AgriFood Canada
R	RLPSI (Yld restricted)	RLPSI (Yield=0)	Yield	BVC	Org	Weight-7	w(-5,-1,150,70)	7	GID-007	88.69	79.6	5.38	15.49	905.204	AAC Brandon	*AAC Brandon	CWRS	2013	Donor for Org	Yes (all 3 indexes)	Yes	Agriculture and AgriFood Canada
R	RLPSI (Yld restricted)	RLPSI (Yield=0)	Yield	BVC	Org	Weight-7	w(-5,-1,150,70)	157	GID-159	83.18	93	5.01	15.95	902.1	PT472	*PT472	CWRS		Donor for Org	Yes (LPSI and RLPS Yld=0)	Yes	Agriculture and AgriFood Canada
R	RLPSI (Yld restricted)	RLPSI (Yield=0)	Yield	BVC	Org	Weight-7	w(-5,-1,150,70)	88	GID-089	86.47	93.47	5.24	15.79	901.208	CDC Thrive	*CDC Thrive	CWRS	2010	Donor for Org	Yes (LPSI and RLPS Yld=0)	Yes	University of Saskatchewan
R	RLPSI (Yld restricted)	RLPSI (Yield=0)	Yield	BVC	Org	Weight-7	w(-5,-1,150,70)	2	GID-002	88.36	89.58	5.17	15.93	900.4	5605HR CL	*5605HR CL	CNHR	2013	Donor for Org	Yes (LPSI and RLPS Yld=0)	Yes	Syngenta Canada Inc.
R	RLPSI (Yld restricted)	RLPSI (Yield=0)	Yield	BVC	Org	Weight-7	w(-5,-1,150,70)	75	GID-076	85.92	99.71	5.04	16.07	893.678	CDC Bounty	*CDC Bounty	CWRS	2000	Donor for Org	Yes (LPSI and RLPS Yld=0)	Yes	University of Saskatchewan
R	RLPSI (Yld restricted)	RLPSI (Yield=0)	Yield	BVC	Org	Weight-7	w(-5,-1,150,70)	187	GID-189	85.88	94.51	4.46	16.88	893.062	SY479 VB	*SY479 VB	CWRS	2016		Yes (RLPSI Yld=0)	Yes	Syngenta Canada Inc.
R	RLPSI (Yld restricted)	RLPSI (Yield=0)	Yield	BVC	Org	Weight-7	w(-5,-1,150,70)	21	GID-021	88.16	73.59	5.57	14.79	892.595	AAC Viewfield	*AAC Viewfield	CWRS	2016	Donor for Org	Yes (all 3 indexes)	Yes	Agriculture and AgriFood Canada
R	RLPSI (Yld restricted)	RLPSI (Yield=0)	Yield	BVC	Org	Weight-7	w(-5,-1,150,70)	156	GID-158	85.01	84.15	5.02	15.68	891.926	AAC Tisdale	*AAC Tisdale	CWRS	2017		Yes (RLPSI Yld=0)	Yes	Agriculture and AgriFood Canada
R	RLPSI (Yld restricted)	RLPSI (Yield=0)	Yield	BVC	Org	Weight-7	w(-5,-1,150,70)	68	GID-068	84.85	89.89	4.47	16.62	888.814	BYT14-19	*BYT14-19	CWRS			Yes (RLPSI Yld=0)	Yes	University of Alberta
R	RLPSI (Yld restricted)	RLPSI (Yield=0)	Yield	BVC	Org	Weight-8	w(-1,-1,130,70)	179	GID-181	86.06	98.66	4.48	17.68	1153.35	Somerset	*Somerset	CWRS	2005	Donor for Org	Yes (LPSI and RLPS Yld=0)	Yes	Secan Association
R	RLPSI (Yld restricted)	RLPSI (Yield=0)	Yield	BVC	Org	Weight-8	w(-1,-1,130,70)	91	GID-092	87.78	86.05	4.57	16.98	1134.55	CDC VR Morris	*CDC VR Morris	CWRS	2012	Donor for Org	Yes (LPSI and RLPS Yld=0)	Yes	University of Saskatchewan
R	RLPSI (Yld restricted)	RLPSI (Yield=0)	Yield	BVC	Org	Weight-8	w(-1,-1,130,70)	78	GID-079	86.4	89.16	5.33	15.92	1134.08	CDC Imagine	*CDC Imagine	CWRS	2002	Donor for Org	Yes (all 3 indexes)	Yes	University of Saskatchewan
R	RLPSI (Yld restricted)	RLPSI (Yield=0)	Yield	BVC	Org	Weight-8	w(-1,-1,130,70)	137	GID-139	85.25	88.64	5.07	16.18	1129.1	Lillian	*Lillian	CNHR	2003	Donor for Org	Yes (LPSI and RLPS Yld=0)	Yes	Secan Association
R	RLPSI (Yld restricted)	RLPSI (Yield=0)	Yield	BVC	Org	Weight-8	w(-1,-1,130,70)	97	GID-099	89.92	91.43	6.17	14.7	1129.07	Conquer	*Conquer	CNHR	2010	Donor for Org	Yes (all 3 indexes)	Yes	Agriculture and AgriFood Canada
R	RLPSI (Yld restricted)	RLPSI (Yield=0)	Yield	BVC	Org	Weight-8	w(-1,-1,130,70)	26	GID-026	85.23	100.07	4.97	16.52	1127.78	AC Cadillac	*AC Cadillac	CWRS	1996	Donor for Org	Yes (LPSI and RLPS Yld=0)	Yes	Farm Pure Seeds (ex SW Seed Canada Ltd)
R	RLPSI (Yld restricted)	RLPSI (Yield=0)	Yield	BVC	Org	Weight-8	w(-1,-1,130,70)	65	GID-065	84.69	95.53	5.5	15.62	1125.49	Zealand	*Zealand	CWRS	2016	Donor for Org	Yes (all 3 indexes)	Yes	University of Alberta
R	RLPSI (Yld restricted)	RLPSI (Yield=0)	Yield	BVC	Org	Weight-8	w(-1,-1,130,70)	138	GID-140	86.53	95.28	5	16.33	1124.04	Lovitt	*Lovitt	CWRS	2002	Donor for Org	Yes (LPSI and RLPS Yld=0)	Yes	Canterra Seeds
R	RLPSI (Yld restricted)	RLPSI (Yield=0)	Yield	BVC	Org	Weight-8	w(-1,-1,130,70)	7	GID-007	88.69	79.6	5.38	15.49	1123.26	AAC Brandon	*AAC Brandon	CWRS	2013	Donor for Org	Yes (all 3 indexes)	Yes	Agriculture and AgriFood Canada
R	RLPSI (Yld restricted)	RLPSI (Yield=0)	Yield	BVC	Org	Weight-8	w(-1,-1,130,70)	62	GID-062	89	82.51	6	14.63	1121.87	AAC Goodwin	*AAC Goodwin	CPSR	2017	Donor for Org	Yes (all 3 indexes)	Yes	Agriculture and AgriFood Canada
R	RLPSI (Yld restricted)	RLPSI (Yield=0)	Yield	BVC	Org	Weight-8	w(-1,-1,130,70)	2	GID-002	88.36	89.58	5.17	15.93	1120.48	5605HR CL	*5605HR CL	CNHR	2013	Donor for Org	Yes (LPSI and RLPS Yld=0)	Yes	Syngenta Canada Inc.
R	RLPSI (Yld restricted)	RLPSI (Yield=0)	Yield	BVC	Org	Weight-8	w(-1,-1,130,70)	74	GID-074	85.34	96.91	5.21	15.94	1118.33	CDC Alsask	*CDC Alsask	CWRS	2005	Donor for Org	Yes (LPSI and RLPS Yld=0)	Yes	University of Saskatchewan
R	RLPSI (Yld restricted)	RLPSI (Yield=0)	Yield	BVC	Org	Weight-8	w(-1,-1,130,70)	111	GID-113	85.01	88.85	5.11	15.9	1116.97	Goodeve	*Goodeve	CWRS	2007	Donor for Org	Yes (LPSI and RLPS Yld=0)	Yes	Agriculture and AgriFood Canada
R	RLPSI (Yld restricted)	RLPSI (Yield=0)	Yield	BVC	Org	Weight-8	w(-1,-1,130,70)	88	GID-089	86.47	93.47	5.24	15.79	1115.45	CDC Thrive	*CDC Thrive	CWRS	2010	Donor for Org	Yes (LPSI and RLPS Yld=0)	Yes	University of Saskatchewan
R	RLPSI (Yld restricted)	RLPSI (Yield=0)	Yield	BVC	Org	Weight-8	w(-1,-1,130,70)	187	GID-189	85.88	94.51	4.46	16.88	1112.85	SY479 VB	*SY479 VB	CWRS	2016		Yes (RLPSI Yld=0)	Yes	Syngenta Canada Inc.
R	RLPSI (Yld restricted)	RLPSI (Yield=0)	Yield	BVC	Org	Weight-8	w(-1,-1,130,70)	75	GID-076	85.92	99.71	5.04	16.07	1108.81	CDC Bounty	*CDC Bounty	CWRS	2000	Donor for Org	Yes (LPSI and RLPS Yld=0)	Yes	University of Saskatchewan
R	RLPSI (Yld restricted)	RLPSI (Yield=0)	Yield	BVC	Org	Weight-8	w(-1,-1,130,70)	157	GID-159	83.18	93	5.01	15.95	1108.64	PT472	*PT472	CWRS		Donor for Org	Yes (LPSI and RLPS Yld=0)	Yes	Agriculture and AgriFood Canada
R	RLPSI (Yld restricted)	RLPSI (Yield=0)	Yield	BVC	Org	Weight-8	w(-1,-1,130,70)	21	GID-021	88.16	73.59	5.57	14.79	1106.76	AAC Viewfield	*AAC Viewfield	CWRS	2016	Donor for Org	Yes (all 3 indexes)	Yes	Agriculture and AgriFood Canada
R	RLPSI (Yld restricted)	RLPSI (Yield=0)	Yield	BVC	Org	Weight-8	w(-1,-1,130,70)	68	GID-068	84.85	89.89	4.47	16.62	1104.99	BYT14-19	*BYT14-19	CWRS			Yes (RLPSI Yld=0)	Yes	University of Alberta
R	RLPSI (Yld restricted)	RLPSI (Yield=0)	Yield	BVC	Org	Weight-8	w(-1,-1,130,70)	156	GID-158	85.01	84.15	5.02	15.68	1102.91	AAC Tisdale	*AAC Tisdale	CWRS	2017		Yes (RLPSI Yld=0)	Yes	Agriculture and AgriFood Canada
R	RLPSI (Yld restricted)	RLPSI (Yield=0)	Yield	BVC	Org	Weight-9	w(-5,-1,130,70)	179	GID-181	86.06	98.66	4.48	17.68	932.945	Somerset	*Somerset	CWRS	2005	Donor for Org	Yes (LPSI and RLPS Yld=0)	Yes	Secan Association
R	RLPSI (Yld restricted)	RLPSI (Yield=0)	Yield	BVC	Org	Weight-9	w(-5,-1,130,70)	78	GID-079	86.4	89.16	5.33	15.92	921.414	CDC Imagine	*CDC Imagine	CWRS	2002	Donor for Org	Yes (all 3 indexes)	Yes	University of Saskatchewan
R	RLPSI (Yld restricted)	RLPSI (Yield=0)	Yield	BVC	Org	Weight-9	w(-5,-1,130,70)	65	GID-065	84.69	95.53	5.5	15.62	918.769	Zealand	*Zealand	CWRS	2016	Donor for Org	Yes (all 3 indexes)	Yes	University of Alberta
R	RLPSI (Yld restricted)	RLPSI (Yield=0)	Yield	BVC	Org	Weight-9	w(-5,-1,130,70)	137	GID-139	85.25	88.64	5.07	16.18	917.495	Lillian	*Lillian	CNHR	2003	Donor for Org	Yes (LPSI and RLPS Yld=0)	Yes	Secan Association
R	RLPSI (Yld restricted)	RLPSI (Yield=0)	Yield	BVC	Org	Weight-9	w(-5,-1,130,70)	26	GID-026	85.23	100.07	4.97	16.52	914.106	AC Cadillac	*AC Cadillac	CWRS	1996	Donor for Org	Yes (LPSI and RLPS Yld=0)	Yes	Farm Pure Seeds (ex SW Seed Canada Ltd)
R	RLPSI (Yld restricted)	RLPSI (Yield=0)	Yield	BVC	Org	Weight-9	w(-5,-1,130,70)	97	GID-099	89.92	91.43	6.17	14.7	913.4	Conquer	*Conquer	CNHR	2010	Donor for Org	Yes (all 3 indexes)	Yes	Agriculture and AgriFood Canada
R	RLPSI (Yld restricted)	RLPSI (Yield=0)	Yield	BVC	Org	Weight-9	w(-5,-1,130,70)	91	GID-092	87.78	86.05	4.57	16.98	911.11	CDC VR Morris	*CDC VR Morris	CWRS	2012	Donor for Org	Yes (LPSI and RLPS Yld=0)	Yes	University of Saskatchewan
R	RLPSI (Yld restricted)	RLPSI (Yield=0)	Yield	BVC	Org	Weight-9	w(-5,-1,130,70)	62	GID-062	89	82.51	6	14.63	908.282	AAC Goodwin	*AAC Goodwin	CPSR	2017	Donor for Org	Yes (all 3 indexes)	Yes	Agriculture and AgriFood Canada
R	RLPSI (Yld restricted)	RLPSI (Yield=0)	Yield	BVC	Org	Weight-9	w(-5,-1,130,70)	138	GID-140	86.53	95.28	5	16.33	907.257	Lovitt	*Lovitt	CWRS	2002	Donor for Org	Yes (LPSI and RLPS Yld=0)	Yes	Canterra Seeds
R	RLPSI (Yld restricted)	RLPSI (Yield=0)	Yield	BVC	Org	Weight-9	w(-5,-1,130,70)	74	GID-074	85.34	96.91	5.21	15.94	906.828	CDC Alsask	*CDC Alsask	CWRS	2005	Donor for Org	Yes (LPSI and RLPS Yld=0)	Yes	University of Saskatchewan
R	RLPSI (Yld restricted)	RLPSI (Yield=0)	Yield	BVC	Org	Weight-9	w(-5,-1,130,70)	111	GID-113	85.01	88.85	5.11	15.9	906.373	Goodeve	*Goodeve	CWRS	2007	Donor for Org	Yes (LPSI and RLPS Yld=0)	Yes	Agriculture and AgriFood Canada
R	RLPSI (Yld restricted)	RLPSI (Yield=0)	Yield	BVC	Org	Weight-9	w(-5,-1,130,70)	7	GID-007	88.69	79.6	5.38	15.49	905.204	AAC Brandon	*AAC Brandon	CWRS	2013	Donor for Org	Yes (all 3 indexes)	Yes	Agriculture and AgriFood Canada
R	RLPSI (Yld restricted)	RLPSI (Yield=0)	Yield	BVC	Org	Weight-9	w(-5,-1,130,70)	157	GID-159	83.18	93	5.01	15.95	902.1	PT472	*PT472	CWRS		Donor for Org	Yes (LPSI and RLPS Yld=0)	Yes	Agriculture and AgriFood Canada
R	RLPSI (Yld restricted)	RLPSI (Yield=0)	Yield	BVC	Org	Weight-9	w(-5,-1,130,70)	88	GID-089	86.47	93.47	5.24	15.79	901.208	CDC Thrive	*CDC Thrive	CWRS	2010	Donor for Org	Yes (LPSI and RLPS Yld=0)	Yes	University of Saskatchewan
R	RLPSI (Yld restricted)	RLPSI (Yield=0)	Yield	BVC	Org	Weight-9	w(-5,-1,130,70)	2	GID-002	88.36	89.58	5.17	15.93	900.4	5605HR CL	*5605HR CL	CNHR	2013	Donor for Org	Yes (LPSI and RLPS Yld=0)	Yes	Syngenta Canada Inc.
R	RLPSI (Yld restricted)	RLPSI (Yield=0)	Yield	BVC	Org	Weight-9	w(-5,-1,130,70)	75	GID-076	85.92	99.71	5.04	16.07	893.678	CDC Bounty	*CDC Bounty	CWRS	2000	Donor for Org	Yes (LPSI and RLPS Yld=0)	Yes	University of Saskatchewan
R	RLPSI (Yld restricted)	RLPSI (Yield=0)	Yield	BVC	Org	Weight-9	w(-5,-1,130,70)	187	GID-189	85.88	94.51	4.46	16.88	893.062	SY479 VB	*SY479 VB	CWRS	2016		Yes (RLPSI Yld=0)	Yes	Syngenta Canada Inc.
R	RLPSI (Yld restricted)	RLPSI (Yield=0)	Yield	BVC	Org	Weight-9	w(-5,-1,130,70)	21	GID-021	88.16	73.59	5.57	14.79	892.595	AAC Viewfield	*AAC Viewfield	CWRS	2016	Donor for Org	Yes (all 3 indexes)	Yes	Agriculture and AgriFood Canada
R	RLPSI (Yld restricted)	RLPSI (Yield=0)	Yield	BVC	Org	Weight-9	w(-5,-1,130,70)	156	GID-158	85.01	84.15	5.02	15.68	891.926	AAC Tisdale	*AAC Tisdale	CWRS	2017		Yes (RLPSI Yld=0)	Yes	Agriculture and AgriFood Canada
R	RLPSI (Yld restricted)	RLPSI (Yield=0)	Yield	BVC	Org	Weight-9	w(-5,-1,130,70)	68	GID-068	84.85	89.89	4.47	16.62	888.814	BYT14-19	*BYT14-19	CWRS			Yes (RLPSI Yld=0)	Yes	University of Alberta
R	RLPSI (Yld restricted)	RLPSI (Yield=0)	Yield	BVC	Org	Weight-10	w(-1,-1,120,70)	179	GID-181	86.06	98.66	4.48	17.68	1153.35	Somerset	*Somerset	CWRS	2005	Donor for Org	Yes (LPSI and RLPS Yld=0)	Yes	Secan Association
R	RLPSI (Yld restricted)	RLPSI (Yield=0)	Yield	BVC	Org	Weight-10	w(-1,-1,120,70)	91	GID-092	87.78	86.05	4.57	16.98	1134.55	CDC VR Morris	*CDC VR Morris	CWRS	2012	Donor for Org	Yes (LPSI and RLPS Yld=0)	Yes	University of Saskatchewan
R	RLPSI (Yld restricted)	RLPSI (Yield=0)	Yield	BVC	Org	Weight-10	w(-1,-1,120,70)	78	GID-079	86.4	89.16	5.33	15.92	1134.08	CDC Imagine	*CDC Imagine	CWRS	2002	Donor for Org	Yes (all 3 indexes)	Yes	University of Saskatchewan
R	RLPSI (Yld restricted)	RLPSI (Yield=0)	Yield	BVC	Org	Weight-10	w(-1,-1,120,70)	137	GID-139	85.25	88.64	5.07	16.18	1129.1	Lillian	*Lillian	CNHR	2003	Donor for Org	Yes (LPSI and RLPS Yld=0)	Yes	Secan Association
R	RLPSI (Yld restricted)	RLPSI (Yield=0)	Yield	BVC	Org	Weight-10	w(-1,-1,120,70)	97	GID-099	89.92	91.43	6.17	14.7	1129.07	Conquer	*Conquer	CNHR	2010	Donor for Org	Yes (all 3 indexes)	Yes	Agriculture and AgriFood Canada
R	RLPSI (Yld restricted)	RLPSI (Yield=0)	Yield	BVC	Org	Weight-10	w(-1,-1,120,70)	26	GID-026	85.23	100.07	4.97	16.52	1127.78	AC Cadillac	*AC Cadillac	CWRS	1996	Donor for Org	Yes (LPSI and RLPS Yld=0)	Yes	Farm Pure Seeds (ex SW Seed Canada Ltd)
R	RLPSI (Yld restricted)	RLPSI (Yield=0)	Yield	BVC	Org	Weight-10	w(-1,-1,120,70)	65	GID-065	84.69	95.53	5.5	15.62	1125.49	Zealand	*Zealand	CWRS	2016	Donor for Org	Yes (all 3 indexes)	Yes	University of Alberta
R	RLPSI (Yld restricted)	RLPSI (Yield=0)	Yield	BVC	Org	Weight-10	w(-1,-1,120,70)	138	GID-140	86.53	95.28	5	16.33	1124.04	Lovitt	*Lovitt	CWRS	2002	Donor for Org	Yes (LPSI and RLPS Yld=0)	Yes	Canterra Seeds
R	RLPSI (Yld restricted)	RLPSI (Yield=0)	Yield	BVC	Org	Weight-10	w(-1,-1,120,70)	7	GID-007	88.69	79.6	5.38	15.49	1123.26	AAC Brandon	*AAC Brandon	CWRS	2013	Donor for Org	Yes (all 3 indexes)	Yes	Agriculture and AgriFood Canada
R	RLPSI (Yld restricted)	RLPSI (Yield=0)	Yield	BVC	Org	Weight-10	w(-1,-1,120,70)	62	GID-062	89	82.51	6	14.63	1121.87	AAC Goodwin	*AAC Goodwin	CPSR	2017	Donor for Org	Yes (all 3 indexes)	Yes	Agriculture and AgriFood Canada
R	RLPSI (Yld restricted)	RLPSI (Yield=0)	Yield	BVC	Org	Weight-10	w(-1,-1,120,70)	2	GID-002	88.36	89.58	5.17	15.93	1120.48	5605HR CL	*5605HR CL	CNHR	2013	Donor for Org	Yes (LPSI and RLPS Yld=0)	Yes	Syngenta Canada Inc.
R	RLPSI (Yld restricted)	RLPSI (Yield=0)	Yield	BVC	Org	Weight-10	w(-1,-1,120,70)	74	GID-074	85.34	96.91	5.21	15.94	1118.33	CDC Alsask	*CDC Alsask	CWRS	2005	Donor for Org	Yes (LPSI and RLPS Yld=0)	Yes	University of Saskatchewan
R	RLPSI (Yld restricted)	RLPSI (Yield=0)	Yield	BVC	Org	Weight-10	w(-1,-1,120,70)	111	GID-113	85.01	88.85	5.11	15.9	1116.97	Goodeve	*Goodeve	CWRS	2007	Donor for Org	Yes (LPSI and RLPS Yld=0)	Yes	Agriculture and AgriFood Canada
R	RLPSI (Yld restricted)	RLPSI (Yield=0)	Yield	BVC	Org	Weight-10	w(-1,-1,120,70)	88	GID-089	86.47	93.47	5.24	15.79	1115.45	CDC Thrive	*CDC Thrive	CWRS	2010	Donor for Org	Yes (LPSI and RLPS Yld=0)	Yes	University of Saskatchewan
R	RLPSI (Yld restricted)	RLPSI (Yield=0)	Yield	BVC	Org	Weight-10	w(-1,-1,120,70)	187	GID-189	85.88	94.51	4.46	16.88	1112.85	SY479 VB	*SY479 VB	CWRS	2016		Yes (RLPSI Yld=0)	Yes	Syngenta Canada Inc.
R	RLPSI (Yld restricted)	RLPSI (Yield=0)	Yield	BVC	Org	Weight-10	w(-1,-1,120,70)	75	GID-076	85.92	99.71	5.04	16.07	1108.81	CDC Bounty	*CDC Bounty	CWRS	2000	Donor for Org	Yes (LPSI and RLPS Yld=0)	Yes	University of Saskatchewan
R	RLPSI (Yld restricted)	RLPSI (Yield=0)	Yield	BVC	Org	Weight-10	w(-1,-1,120,70)	157	GID-159	83.18	93	5.01	15.95	1108.64	PT472	*PT472	CWRS		Donor for Org	Yes (LPSI and RLPS Yld=0)	Yes	Agriculture and AgriFood Canada
R	RLPSI (Yld restricted)	RLPSI (Yield=0)	Yield	BVC	Org	Weight-10	w(-1,-1,120,70)	21	GID-021	88.16	73.59	5.57	14.79	1106.76	AAC Viewfield	*AAC Viewfield	CWRS	2016	Donor for Org	Yes (all 3 indexes)	Yes	Agriculture and AgriFood Canada
R	RLPSI (Yld restricted)	RLPSI (Yield=0)	Yield	BVC	Org	Weight-10	w(-1,-1,120,70)	68	GID-068	84.85	89.89	4.47	16.62	1104.99	BYT14-19	*BYT14-19	CWRS			Yes (RLPSI Yld=0)	Yes	University of Alberta
R	RLPSI (Yld restricted)	RLPSI (Yield=0)	Yield	BVC	Org	Weight-10	w(-1,-1,120,70)	156	GID-158	85.01	84.15	5.02	15.68	1102.91	AAC Tisdale	*AAC Tisdale	CWRS	2017		Yes (RLPSI Yld=0)	Yes	Agriculture and AgriFood Canada
R	RLPSI (GPC restricted)	RLPSI (GPC=0)	GPC	BVC	Con	Weight-6	w(-1,-1,150,70)	62	GID-062	90.48	78.59	5.64	15.15	1092.57	AAC Goodwin	*AAC Goodwin	CPSR	2017	Donor for Org	Yes (all 3 indexes)	Yes	Agriculture and AgriFood Canada
R	RLPSI (GPC restricted)	RLPSI (GPC=0)	GPC	BVC	Con	Weight-6	w(-1,-1,150,70)	122	GID-124	93.38	74.63	4.97	16.63	1081.09	AAC Castle	*AAC Castle	CPSR	2018		Yes using RLPSI (GPC=0)	Yes	Agriculture and AgriFood Canada
R	RLPSI (GPC restricted)	RLPSI (GPC=0)	GPC	BVC	Con	Weight-6	w(-1,-1,150,70)	113	GID-115	92.99	82.06	5.85	13.97	1074.54	CDC Throttle	CDC Throttle	CWSP	2016		Yes using RLPSI (GPC=0)		University of Saskatchewan
R	RLPSI (GPC restricted)	RLPSI (GPC=0)	GPC	BVC	Con	Weight-6	w(-1,-1,150,70)	97	GID-099	91.71	84.45	5.16	16.36	1074.29	Conquer	*Conquer	CNHR	2010	Donor for Org	Yes (all 3 indexes)	Yes	Agriculture and AgriFood Canada
R	RLPSI (GPC restricted)	RLPSI (GPC=0)	GPC	BVC	Con	Weight-6	w(-1,-1,150,70)	7	GID-007	91.03	78.13	5.24	15.72	1070.8	AAC Brandon	*AAC Brandon	CWRS	2013	Donor for Org	Yes (all 3 indexes)	Yes	Agriculture and AgriFood Canada
R	RLPSI (GPC restricted)	RLPSI (GPC=0)	GPC	BVC	Con	Weight-6	w(-1,-1,150,70)	16	GID-016	91.39	72.43	5.2	15.33	1063.44	AAC Penhold	*AAC Penhold	CPSR	2014		Yes using RLPSI (GPC=0)	Yes	Agriculture and AgriFood Canada
R	RLPSI (GPC restricted)	RLPSI (GPC=0)	GPC	BVC	Con	Weight-6	w(-1,-1,150,70)	184	GID-186	95.3	82.67	6.56	11.15	1059.77	SWS52	SWS52	CWSWS	1905		Yes using RLPSI (GPC=0)
R	RLPSI (GPC restricted)	RLPSI (GPC=0)	GPC	BVC	Con	Weight-6	w(-1,-1,150,70)	114	GID-116	94.58	83.76	6.12	12.38	1050.89	AAC Awesome	AAC Awesome	CWSP	2016		Yes using RLPSI (GPC=0)		Agriculture and AgriFood Canada
R	RLPSI (GPC restricted)	RLPSI (GPC=0)	GPC	BVC	Con	Weight-6	w(-1,-1,150,70)	2	GID-002	89.61	84.79	4.86	16.7	1050.3	5605HR CL	*5605HR CL	CNHR	2013	Donor for Org	Yes (LPSI and RLPS Yld=0)	Yes	Syngenta Canada Inc.
R	RLPSI (GPC restricted)	RLPSI (GPC=0)	GPC	BVC	Con	Weight-6	w(-1,-1,150,70)	21	GID-021	90.06	74.07	5.05	15.44	1046.78	AAC Viewfield	*AAC Viewfield	CWRS	2016	Donor for Org	Yes (all 3 indexes)	Yes	Agriculture and AgriFood Canada
R	RLPSI (GPC restricted)	RLPSI (GPC=0)	GPC	BVC	Con	Weight-6	w(-1,-1,150,70)	102	GID-104	90.58	80.8	5.49	14.23	1043.73	Faller	Faller	CNHR	2018		Yes using RLPSI (GPC=0)		Seed Depot Corp.
R	RLPSI (GPC restricted)	RLPSI (GPC=0)	GPC	BVC	Con	Weight-7	w(-5,-1,150,70)	62	GID-062	90.48	78.59	5.64	15.15	693.983	AAC Goodwin	*AAC Goodwin	CPSR	2017	Donor for Org	Yes (all 3 indexes)	Yes	Agriculture and AgriFood Canada
R	RLPSI (GPC restricted)	RLPSI (GPC=0)	GPC	BVC	Con	Weight-7	w(-5,-1,150,70)	113	GID-115	92.99	82.06	5.85	13.97	672.683	CDC Throttle	CDC Throttle	CWSP	2016		Yes using RLPSI (GPC=0)		University of Saskatchewan
R	RLPSI (GPC restricted)	RLPSI (GPC=0)	GPC	BVC	Con	Weight-7	w(-5,-1,150,70)	7	GID-007	91.03	78.13	5.24	15.72	668.072	AAC Brandon	*AAC Brandon	CWRS	2013	Donor for Org	Yes (all 3 indexes)	Yes	Agriculture and AgriFood Canada
R	RLPSI (GPC restricted)	RLPSI (GPC=0)	GPC	BVC	Con	Weight-7	w(-5,-1,150,70)	122	GID-124	93.38	74.63	4.97	16.63	666.339	AAC Castle	*AAC Castle	CPSR	2018		Yes using RLPSI (GPC=0)	Yes	Agriculture and AgriFood Canada
R	RLPSI (GPC restricted)	RLPSI (GPC=0)	GPC	BVC	Con	Weight-7	w(-5,-1,150,70)	97	GID-099	91.71	84.45	5.16	16.36	665.822	Conquer	*Conquer	CNHR	2010	Donor for Org	Yes (all 3 indexes)	Yes	Agriculture and AgriFood Canada
R	RLPSI (GPC restricted)	RLPSI (GPC=0)	GPC	BVC	Con	Weight-7	w(-5,-1,150,70)	184	GID-186	95.3	82.67	6.56	11.15	662.91	SWS52	SWS52	CWSWS	1905		Yes using RLPSI (GPC=0)
R	RLPSI (GPC restricted)	RLPSI (GPC=0)	GPC	BVC	Con	Weight-7	w(-5,-1,150,70)	16	GID-016	91.39	72.43	5.2	15.33	661.783	AAC Penhold	*AAC Penhold	CPSR	2014		Yes using RLPSI (GPC=0)	Yes	Agriculture and AgriFood Canada
R	RLPSI (GPC restricted)	RLPSI (GPC=0)	GPC	BVC	Con	Weight-7	w(-5,-1,150,70)	114	GID-116	94.58	83.76	6.12	12.38	650.971	AAC Awesome	AAC Awesome	CWSP	2016		Yes using RLPSI (GPC=0)		Agriculture and AgriFood Canada
R	RLPSI (GPC restricted)	RLPSI (GPC=0)	GPC	BVC	Con	Weight-7	w(-5,-1,150,70)	102	GID-104	90.58	80.8	5.49	14.23	649.447	Faller	Faller	CNHR	2018		Yes using RLPSI (GPC=0)		Seed Depot Corp.
R	RLPSI (GPC restricted)	RLPSI (GPC=0)	GPC	BVC	Con	Weight-7	w(-5,-1,150,70)	21	GID-021	90.06	74.07	5.05	15.44	649.267	AAC Viewfield	*AAC Viewfield	CWRS	2016	Donor for Org	Yes (all 3 indexes)	Yes	Agriculture and AgriFood Canada
R	RLPSI (GPC restricted)	RLPSI (GPC=0)	GPC	BVC	Con	Weight-7	w(-5,-1,150,70)	2	GID-002	89.61	84.79	4.86	16.7	647.77	5605HR CL	*5605HR CL	CNHR	2013	Donor for Org	Yes (LPSI and RLPS Yld=0)	Yes	Syngenta Canada Inc.
R	RLPSI (GPC restricted)	RLPSI (GPC=0)	GPC	BVC	Con	Weight-7	w(-5,-1,150,70)	65	GID-065	86.61	90.12	5.17	15.53	644.778	Zealand	*Zealand	CWRS	2016	Donor for Org	Yes (all 3 indexes)	Yes	University of Alberta
R	RLPSI (GPC restricted)	RLPSI (GPC=0)	GPC	BVC	Con	Weight-8	w(-1,-1,130,70)	62	GID-062	90.48	78.59	5.64	15.15	928.341	AAC Goodwin	*AAC Goodwin	CPSR	2017	Donor for Org	Yes (all 3 indexes)	Yes	Agriculture and AgriFood Canada
R	RLPSI (GPC restricted)	RLPSI (GPC=0)	GPC	BVC	Con	Weight-8	w(-1,-1,130,70)	122	GID-124	93.38	74.63	4.97	16.63	918.644	AAC Castle	*AAC Castle	CPSR	2018		Yes using RLPSI (GPC=0)	Yes	Agriculture and AgriFood Canada
R	RLPSI (GPC restricted)	RLPSI (GPC=0)	GPC	BVC	Con	Weight-8	w(-1,-1,130,70)	113	GID-115	92.99	82.06	5.85	13.97	911.908	CDC Throttle	CDC Throttle	CWSP	2016		Yes using RLPSI (GPC=0)		University of Saskatchewan
R	RLPSI (GPC restricted)	RLPSI (GPC=0)	GPC	BVC	Con	Weight-8	w(-1,-1,130,70)	97	GID-099	91.71	84.45	5.16	16.36	911.789	Conquer	*Conquer	CNHR	2010	Donor for Org	Yes (all 3 indexes)	Yes	Agriculture and AgriFood Canada
R	RLPSI (GPC restricted)	RLPSI (GPC=0)	GPC	BVC	Con	Weight-8	w(-1,-1,130,70)	7	GID-007	91.03	78.13	5.24	15.72	909.512	AAC Brandon	*AAC Brandon	CWRS	2013	Donor for Org	Yes (all 3 indexes)	Yes	Agriculture and AgriFood Canada
R	RLPSI (GPC restricted)	RLPSI (GPC=0)	GPC	BVC	Con	Weight-8	w(-1,-1,130,70)	16	GID-016	91.39	72.43	5.2	15.33	903.723	AAC Penhold	*AAC Penhold	CPSR	2014		Yes using RLPSI (GPC=0)	Yes	Agriculture and AgriFood Canada
R	RLPSI (GPC restricted)	RLPSI (GPC=0)	GPC	BVC	Con	Weight-8	w(-1,-1,130,70)	184	GID-186	95.3	82.67	6.56	11.15	898.494	SWS52	SWS52	CWSWS	1905		Yes using RLPSI (GPC=0)
R	RLPSI (GPC restricted)	RLPSI (GPC=0)	GPC	BVC	Con	Weight-8	w(-1,-1,130,70)	2	GID-002	89.61	84.79	4.86	16.7	891.239	5605HR CL	*5605HR CL	CNHR	2013	Donor for Org	Yes (LPSI and RLPS Yld=0)	Yes	Syngenta Canada Inc.
R	RLPSI (GPC restricted)	RLPSI (GPC=0)	GPC	BVC	Con	Weight-8	w(-1,-1,130,70)	114	GID-116	94.58	83.76	6.12	12.38	890.878	AAC Awesome	AAC Awesome	CWSP	2016		Yes using RLPSI (GPC=0)		Agriculture and AgriFood Canada
R	RLPSI (GPC restricted)	RLPSI (GPC=0)	GPC	BVC	Con	Weight-8	w(-1,-1,130,70)	21	GID-021	90.06	74.07	5.05	15.44	889.258	AAC Viewfield	*AAC Viewfield	CWRS	2016	Donor for Org	Yes (all 3 indexes)	Yes	Agriculture and AgriFood Canada
R	RLPSI (GPC restricted)	RLPSI (GPC=0)	GPC	BVC	Con	Weight-8	w(-1,-1,130,70)	102	GID-104	90.58	80.8	5.49	14.23	885.665	Faller	Faller	CNHR	2018		Yes using RLPSI (GPC=0)		Seed Depot Corp.
R	RLPSI (GPC restricted)	RLPSI (GPC=0)	GPC	BVC	Con	Weight-9	w(-5,-1,130,70)	62	GID-062	90.48	78.59	5.64	15.15	529.753	AAC Goodwin	*AAC Goodwin	CPSR	2017	Donor for Org	Yes (all 3 indexes)	Yes	Agriculture and AgriFood Canada
R	RLPSI (GPC restricted)	RLPSI (GPC=0)	GPC	BVC	Con	Weight-9	w(-5,-1,130,70)	113	GID-115	92.99	82.06	5.85	13.97	510.047	CDC Throttle	CDC Throttle	CWSP	2016		Yes using RLPSI (GPC=0)		University of Saskatchewan
R	RLPSI (GPC restricted)	RLPSI (GPC=0)	GPC	BVC	Con	Weight-9	w(-5,-1,130,70)	7	GID-007	91.03	78.13	5.24	15.72	506.788	AAC Brandon	*AAC Brandon	CWRS	2013	Donor for Org	Yes (all 3 indexes)	Yes	Agriculture and AgriFood Canada
R	RLPSI (GPC restricted)	RLPSI (GPC=0)	GPC	BVC	Con	Weight-9	w(-5,-1,130,70)	122	GID-124	93.38	74.63	4.97	16.63	503.892	AAC Castle	*AAC Castle	CPSR	2018		Yes using RLPSI (GPC=0)	Yes	Agriculture and AgriFood Canada
R	RLPSI (GPC restricted)	RLPSI (GPC=0)	GPC	BVC	Con	Weight-9	w(-5,-1,130,70)	97	GID-099	91.71	84.45	5.16	16.36	503.318	Conquer	*Conquer	CNHR	2010	Donor for Org	Yes (all 3 indexes)	Yes	Agriculture and AgriFood Canada
R	RLPSI (GPC restricted)	RLPSI (GPC=0)	GPC	BVC	Con	Weight-9	w(-5,-1,130,70)	16	GID-016	91.39	72.43	5.2	15.33	502.062	AAC Penhold	*AAC Penhold	CPSR	2014		Yes using RLPSI (GPC=0)	Yes	Agriculture and AgriFood Canada
R	RLPSI (GPC restricted)	RLPSI (GPC=0)	GPC	BVC	Con	Weight-9	w(-5,-1,130,70)	184	GID-186	95.3	82.67	6.56	11.15	501.637	SWS52	SWS52	CWSWS	1905		Yes using RLPSI (GPC=0)
R	RLPSI (GPC restricted)	RLPSI (GPC=0)	GPC	BVC	Con	Weight-9	w(-5,-1,130,70)	21	GID-021	90.06	74.07	5.05	15.44	491.747	AAC Viewfield	*AAC Viewfield	CWRS	2016	Donor for Org	Yes (all 3 indexes)	Yes	Agriculture and AgriFood Canada
R	RLPSI (GPC restricted)	RLPSI (GPC=0)	GPC	BVC	Con	Weight-9	w(-5,-1,130,70)	102	GID-104	90.58	80.8	5.49	14.23	491.379	Faller	Faller	CNHR	2018		Yes using RLPSI (GPC=0)		Seed Depot Corp.
R	RLPSI (GPC restricted)	RLPSI (GPC=0)	GPC	BVC	Con	Weight-9	w(-5,-1,130,70)	114	GID-116	94.58	83.76	6.12	12.38	490.956	AAC Awesome	AAC Awesome	CWSP	2016		Yes using RLPSI (GPC=0)		Agriculture and AgriFood Canada
R	RLPSI (GPC restricted)	RLPSI (GPC=0)	GPC	BVC	Con	Weight-9	w(-5,-1,130,70)	2	GID-002	89.61	84.79	4.86	16.7	488.708	5605HR CL	*5605HR CL	CNHR	2013	Donor for Org	Yes (LPSI and RLPS Yld=0)	Yes	Syngenta Canada Inc.
R	RLPSI (GPC restricted)	RLPSI (GPC=0)	GPC	BVC	Con	Weight-9	w(-5,-1,130,70)	65	GID-065	86.61	90.12	5.17	15.53	487.8	Zealand	*Zealand	CWRS	2016	Donor for Org	Yes (all 3 indexes)	Yes	University of Alberta
R	RLPSI (GPC restricted)	RLPSI (GPC=0)	GPC	BVC	Con	Weight-10	w(-1,-1,120,70)	62	GID-062	90.48	78.59	5.64	15.15	846.227	AAC Goodwin	*AAC Goodwin	CPSR	2017	Donor for Org	Yes (all 3 indexes)	Yes	Agriculture and AgriFood Canada
R	RLPSI (GPC restricted)	RLPSI (GPC=0)	GPC	BVC	Con	Weight-10	w(-1,-1,120,70)	122	GID-124	93.38	74.63	4.97	16.63	837.421	AAC Castle	*AAC Castle	CPSR	2018		Yes using RLPSI (GPC=0)	Yes	Agriculture and AgriFood Canada
R	RLPSI (GPC restricted)	RLPSI (GPC=0)	GPC	BVC	Con	Weight-10	w(-1,-1,120,70)	113	GID-115	92.99	82.06	5.85	13.97	830.59	CDC Throttle	CDC Throttle	CWSP	2016		Yes using RLPSI (GPC=0)		University of Saskatchewan
R	RLPSI (GPC restricted)	RLPSI (GPC=0)	GPC	BVC	Con	Weight-10	w(-1,-1,120,70)	97	GID-099	91.71	84.45	5.16	16.36	830.537	Conquer	*Conquer	CNHR	2010	Donor for Org	Yes (all 3 indexes)	Yes	Agriculture and AgriFood Canada
R	RLPSI (GPC restricted)	RLPSI (GPC=0)	GPC	BVC	Con	Weight-10	w(-1,-1,120,70)	7	GID-007	91.03	78.13	5.24	15.72	828.87	AAC Brandon	*AAC Brandon	CWRS	2013	Donor for Org	Yes (all 3 indexes)	Yes	Agriculture and AgriFood Canada
R	RLPSI (GPC restricted)	RLPSI (GPC=0)	GPC	BVC	Con	Weight-10	w(-1,-1,120,70)	16	GID-016	91.39	72.43	5.2	15.33	823.862	AAC Penhold	*AAC Penhold	CPSR	2014		Yes using RLPSI (GPC=0)	Yes	Agriculture and AgriFood Canada
R	RLPSI (GPC restricted)	RLPSI (GPC=0)	GPC	BVC	Con	Weight-10	w(-1,-1,120,70)	184	GID-186	95.3	82.67	6.56	11.15	817.858	SWS52	SWS52	CWSWS	1905		Yes using RLPSI (GPC=0)
R	RLPSI (GPC restricted)	RLPSI (GPC=0)	GPC	BVC	Con	Weight-10	w(-1,-1,120,70)	2	GID-002	89.61	84.79	4.86	16.7	811.709	5605HR CL	*5605HR CL	CNHR	2013	Donor for Org	Yes (LPSI and RLPS Yld=0)	Yes	Syngenta Canada Inc.
R	RLPSI (GPC restricted)	RLPSI (GPC=0)	GPC	BVC	Con	Weight-10	w(-1,-1,120,70)	114	GID-116	94.58	83.76	6.12	12.38	810.871	AAC Awesome	AAC Awesome	CWSP	2016		Yes using RLPSI (GPC=0)		Agriculture and AgriFood Canada
R	RLPSI (GPC restricted)	RLPSI (GPC=0)	GPC	BVC	Con	Weight-10	w(-1,-1,120,70)	21	GID-021	90.06	74.07	5.05	15.44	810.498	AAC Viewfield	*AAC Viewfield	CWRS	2016	Donor for Org	Yes (all 3 indexes)	Yes	Agriculture and AgriFood Canada
R	RLPSI (GPC restricted)	RLPSI (GPC=0)	GPC	BVC	Con	Weight-10	w(-1,-1,120,70)	102	GID-104	90.58	80.8	5.49	14.23	806.631	Faller	Faller	CNHR	2018		Yes using RLPSI (GPC=0)		Seed Depot Corp.
R	RLPSI (GPC restricted)	RLPSI (GPC=0)	GPC	BVC	Org	Weight-6	w(-1,-1,150,70)	97	GID-099	89.92	91.43	6.17	14.7	968.017	Conquer	*Conquer	CNHR	2010	Donor for Org	Yes (all 3 indexes)	Yes	Agriculture and AgriFood Canada
R	RLPSI (GPC restricted)	RLPSI (GPC=0)	GPC	BVC	Org	Weight-6	w(-1,-1,150,70)	62	GID-062	89	82.51	6	14.63	963.251	AAC Goodwin	*AAC Goodwin	CPSR	2017	Donor for Org	Yes (all 3 indexes)	Yes	Agriculture and AgriFood Canada
R	RLPSI (GPC restricted)	RLPSI (GPC=0)	GPC	BVC	Org	Weight-6	w(-1,-1,150,70)	113	GID-115	91.82	83.07	6.41	13.08	954.972	CDC Throttle	CDC Throttle	CWSP	2016		Yes using RLPSI (GPC=0)		University of Saskatchewan
R	RLPSI (GPC restricted)	RLPSI (GPC=0)	GPC	BVC	Org	Weight-6	w(-1,-1,150,70)	21	GID-021	88.16	73.59	5.57	14.79	941.138	AAC Viewfield	*AAC Viewfield	CWRS	2016	Donor for Org	Yes (all 3 indexes)	Yes	Agriculture and AgriFood Canada
R	RLPSI (GPC restricted)	RLPSI (GPC=0)	GPC	BVC	Org	Weight-6	w(-1,-1,150,70)	7	GID-007	88.69	79.6	5.38	15.49	935.857	AAC Brandon	*AAC Brandon	CWRS	2013	Donor for Org	Yes (all 3 indexes)	Yes	Agriculture and AgriFood Canada
R	RLPSI (GPC restricted)	RLPSI (GPC=0)	GPC	BVC	Org	Weight-6	w(-1,-1,150,70)	122	GID-124	90.27	77.72	5.53	14.78	932.125	AAC Castle	*AAC Castle	CPSR	2018		Yes using RLPSI (GPC=0)	Yes	Agriculture and AgriFood Canada
R	RLPSI (GPC restricted)	RLPSI (GPC=0)	GPC	BVC	Org	Weight-6	w(-1,-1,150,70)	102	GID-104	88.63	82.56	6.02	13.47	928.548	Faller	Faller	CNHR	2018		Yes using RLPSI (GPC=0)		Seed Depot Corp.
R	RLPSI (GPC restricted)	RLPSI (GPC=0)	GPC	BVC	Org	Weight-6	w(-1,-1,150,70)	78	GID-079	86.4	89.16	5.33	15.92	927.491	CDC Imagine	*CDC Imagine	CWRS	2002	Donor for Org	Yes (all 3 indexes)	Yes	University of Saskatchewan
R	RLPSI (GPC restricted)	RLPSI (GPC=0)	GPC	BVC	Org	Weight-6	w(-1,-1,150,70)	119	GID-121	86.38	78.97	5.74	14.13	926.617	CDC Cordon CLPlus	CDC Cordon CLPlus	CNHR	2018		Yes using RLPSI (GPC=0)		University of Saskatchewan
R	RLPSI (GPC restricted)	RLPSI (GPC=0)	GPC	BVC	Org	Weight-6	w(-1,-1,150,70)	114	GID-116	91.62	79.85	6.5	11.72	925.995	AAC Awesome	AAC Awesome	CWSP	2016		Yes using RLPSI (GPC=0)		Agriculture and AgriFood Canada
R	RLPSI (GPC restricted)	RLPSI (GPC=0)	GPC	BVC	Org	Weight-6	w(-1,-1,150,70)	65	GID-065	84.69	95.53	5.5	15.62	922.688	Zealand	*Zealand	CWRS	2016	Donor for Org	Yes (all 3 indexes)	Yes	University of Alberta
R	RLPSI (GPC restricted)	RLPSI (GPC=0)	GPC	BVC	Org	Weight-6	w(-1,-1,150,70)	16	GID-016	88.48	73.71	5.23	15.15	920.28	AAC Penhold	*AAC Penhold	CPSR	2014		Yes using RLPSI (GPC=0)	Yes	Agriculture and AgriFood Canada
R	RLPSI (GPC restricted)	RLPSI (GPC=0)	GPC	BVC	Org	Weight-6	w(-1,-1,150,70)	13	GID-013	88.5	83.02	5.72	14.11	919.319	AAC Foray	AAC Foray	CPSR	2014		Yes using RLPSI (GPC=0)		Agriculture and AgriFood Canada
R	RLPSI (GPC restricted)	RLPSI (GPC=0)	GPC	BVC	Org	Weight-6	w(-1,-1,150,70)	11	GID-011	88.8	78.44	5.35	14.96	918.406	AAC Elie	AAC Elie	CWRS	2013		Yes using RLPSI (GPC=0)		Agriculture and AgriFood Canada
R	RLPSI (GPC restricted)	RLPSI (GPC=0)	GPC	BVC	Org	Weight-6	w(-1,-1,150,70)	184	GID-186	93.48	78.68	6.74	10.58	916.438	SWS52	SWS52	CWSWS	1905		Yes using RLPSI (GPC=0)
R	RLPSI (GPC restricted)	RLPSI (GPC=0)	GPC	BVC	Org	Weight-6	w(-1,-1,150,70)	183	GID-185	86.92	83.44	5.6	14.42	915.727	Superb	Superb	CWRS	2001		Yes using RLPSI (GPC=0)		Agriculture and AgriFood Canada
R	RLPSI (GPC restricted)	RLPSI (GPC=0)	GPC	BVC	Org	Weight-6	w(-1,-1,150,70)	189	GID-191	89.12	82.04	5.71	13.93	914.806	SY985	SY985	CPSR	2011		Yes using RLPSI (GPC=0)		Syngenta Canada Inc.
R	RLPSI (GPC restricted)	RLPSI (GPC=0)	GPC	BVC	Org	Weight-6	w(-1,-1,150,70)	2	GID-002	88.36	89.58	5.17	15.93	913.551	5605HR CL	*5605HR CL	CNHR	2013	Donor for Org	Yes (LPSI and RLPS Yld=0)	Yes	Syngenta Canada Inc.
R	RLPSI (GPC restricted)	RLPSI (GPC=0)	GPC	BVC	Org	Weight-6	w(-1,-1,150,70)	5	GID-005	89.76	84.05	5.92	13.34	913.547	5702PR	5702PR	CPSR	2008		Yes using RLPSI (GPC=0)		Syngenta Canada Inc.
R	RLPSI (GPC restricted)	RLPSI (GPC=0)	GPC	BVC	Org	Weight-6	w(-1,-1,150,70)	137	GID-139	85.25	88.64	5.07	16.18	910.935	Lillian	*Lillian	CNHR	2003	Donor for Org	Yes (LPSI and RLPS Yld=0)	Yes	Secan Association
R	RLPSI (GPC restricted)	RLPSI (GPC=0)	GPC	BVC	Org	Weight-7	w(-5,-1,150,70)	97	GID-099	89.92	91.43	6.17	14.7	614.588	Conquer	*Conquer	CNHR	2010	Donor for Org	Yes (all 3 indexes)	Yes	Agriculture and AgriFood Canada
R	RLPSI (GPC restricted)	RLPSI (GPC=0)	GPC	BVC	Org	Weight-7	w(-5,-1,150,70)	62	GID-062	89	82.51	6	14.63	613.535	AAC Goodwin	*AAC Goodwin	CPSR	2017	Donor for Org	Yes (all 3 indexes)	Yes	Agriculture and AgriFood Canada
R	RLPSI (GPC restricted)	RLPSI (GPC=0)	GPC	BVC	Org	Weight-7	w(-5,-1,150,70)	113	GID-115	91.82	83.07	6.41	13.08	603.135	CDC Throttle	CDC Throttle	CWSP	2016		Yes using RLPSI (GPC=0)		University of Saskatchewan
R	RLPSI (GPC restricted)	RLPSI (GPC=0)	GPC	BVC	Org	Weight-7	w(-5,-1,150,70)	21	GID-021	88.16	73.59	5.57	14.79	594.04	AAC Viewfield	*AAC Viewfield	CWRS	2016	Donor for Org	Yes (all 3 indexes)	Yes	Agriculture and AgriFood Canada
R	RLPSI (GPC restricted)	RLPSI (GPC=0)	GPC	BVC	Org	Weight-7	w(-5,-1,150,70)	119	GID-121	86.38	78.97	5.74	14.13	587.618	CDC Cordon CLPlus	CDC Cordon CLPlus	CNHR	2018		Yes using RLPSI (GPC=0)		University of Saskatchewan
R	RLPSI (GPC restricted)	RLPSI (GPC=0)	GPC	BVC	Org	Weight-7	w(-5,-1,150,70)	102	GID-104	88.63	82.56	6.02	13.47	585.158	Faller	Faller	CNHR	2018		Yes using RLPSI (GPC=0)		Seed Depot Corp.
R	RLPSI (GPC restricted)	RLPSI (GPC=0)	GPC	BVC	Org	Weight-7	w(-5,-1,150,70)	7	GID-007	88.69	79.6	5.38	15.49	583.829	AAC Brandon	*AAC Brandon	CWRS	2013	Donor for Org	Yes (all 3 indexes)	Yes	Agriculture and AgriFood Canada
R	RLPSI (GPC restricted)	RLPSI (GPC=0)	GPC	BVC	Org	Weight-7	w(-5,-1,150,70)	65	GID-065	84.69	95.53	5.5	15.62	581.638	Zealand	*Zealand	CWRS	2016	Donor for Org	Yes (all 3 indexes)	Yes	University of Alberta
R	RLPSI (GPC restricted)	RLPSI (GPC=0)	GPC	BVC	Org	Weight-7	w(-5,-1,150,70)	114	GID-116	91.62	79.85	6.5	11.72	580.96	AAC Awesome	AAC Awesome	CWSP	2016		Yes using RLPSI (GPC=0)		Agriculture and AgriFood Canada
R	RLPSI (GPC restricted)	RLPSI (GPC=0)	GPC	BVC	Org	Weight-7	w(-5,-1,150,70)	78	GID-079	86.4	89.16	5.33	15.92	580.219	CDC Imagine	*CDC Imagine	CWRS	2002	Donor for Org	Yes (all 3 indexes)	Yes	University of Saskatchewan
R	RLPSI (GPC restricted)	RLPSI (GPC=0)	GPC	BVC	Org	Weight-7	w(-5,-1,150,70)	122	GID-124	90.27	77.72	5.53	14.78	578.36	AAC Castle	*AAC Castle	CPSR	2018		Yes using RLPSI (GPC=0)	Yes	Agriculture and AgriFood Canada
R	RLPSI (GPC restricted)	RLPSI (GPC=0)	GPC	BVC	Org	Weight-7	w(-5,-1,150,70)	13	GID-013	88.5	83.02	5.72	14.11	573.657	AAC Foray	AAC Foray	CPSR	2014		Yes using RLPSI (GPC=0)		Agriculture and AgriFood Canada
R	RLPSI (GPC restricted)	RLPSI (GPC=0)	GPC	BVC	Org	Weight-7	w(-5,-1,150,70)	183	GID-185	86.92	83.44	5.6	14.42	573.641	Superb	Superb	CWRS	2001		Yes using RLPSI (GPC=0)		Agriculture and AgriFood Canada
R	RLPSI (GPC restricted)	RLPSI (GPC=0)	GPC	BVC	Org	Weight-7	w(-5,-1,150,70)	16	GID-016	88.48	73.71	5.23	15.15	570.814	AAC Penhold	*AAC Penhold	CPSR	2014		Yes using RLPSI (GPC=0)	Yes	Agriculture and AgriFood Canada
R	RLPSI (GPC restricted)	RLPSI (GPC=0)	GPC	BVC	Org	Weight-7	w(-5,-1,150,70)	184	GID-186	93.48	78.68	6.74	10.58	570.626	SWS52	SWS52	CWSWS	1905		Yes using RLPSI (GPC=0)
R	RLPSI (GPC restricted)	RLPSI (GPC=0)	GPC	BVC	Org	Weight-7	w(-5,-1,150,70)	11	GID-011	88.8	78.44	5.35	14.96	568.488	AAC Elie	AAC Elie	CWRS	2013		Yes using RLPSI (GPC=0)		Agriculture and AgriFood Canada
R	RLPSI (GPC restricted)	RLPSI (GPC=0)	GPC	BVC	Org	Weight-7	w(-5,-1,150,70)	189	GID-191	89.12	82.04	5.71	13.93	568.082	SY985	SY985	CPSR	2011		Yes using RLPSI (GPC=0)		Syngenta Canada Inc.
R	RLPSI (GPC restricted)	RLPSI (GPC=0)	GPC	BVC	Org	Weight-7	w(-5,-1,150,70)	5	GID-005	89.76	84.05	5.92	13.34	567.235	5702PR	5702PR	CPSR	2008		Yes using RLPSI (GPC=0)		Syngenta Canada Inc.
R	RLPSI (GPC restricted)	RLPSI (GPC=0)	GPC	BVC	Org	Weight-7	w(-5,-1,150,70)	137	GID-139	85.25	88.64	5.07	16.18	566.274	Lillian	*Lillian	CNHR	2003	Donor for Org	Yes (LPSI and RLPS Yld=0)	Yes	Secan Association
R	RLPSI (GPC restricted)	RLPSI (GPC=0)	GPC	BVC	Org	Weight-8	w(-1,-1,130,70)	97	GID-099	89.92	91.43	6.17	14.7	822.23	Conquer	*Conquer	CNHR	2010	Donor for Org	Yes (all 3 indexes)	Yes	Agriculture and AgriFood Canada
R	RLPSI (GPC restricted)	RLPSI (GPC=0)	GPC	BVC	Org	Weight-8	w(-1,-1,130,70)	62	GID-062	89	82.51	6	14.63	819.156	AAC Goodwin	*AAC Goodwin	CPSR	2017	Donor for Org	Yes (all 3 indexes)	Yes	Agriculture and AgriFood Canada
R	RLPSI (GPC restricted)	RLPSI (GPC=0)	GPC	BVC	Org	Weight-8	w(-1,-1,130,70)	113	GID-115	91.82	83.07	6.41	13.08	811.259	CDC Throttle	CDC Throttle	CWSP	2016		Yes using RLPSI (GPC=0)		University of Saskatchewan
R	RLPSI (GPC restricted)	RLPSI (GPC=0)	GPC	BVC	Org	Weight-8	w(-1,-1,130,70)	21	GID-021	88.16	73.59	5.57	14.79	801.078	AAC Viewfield	*AAC Viewfield	CWRS	2016	Donor for Org	Yes (all 3 indexes)	Yes	Agriculture and AgriFood Canada
R	RLPSI (GPC restricted)	RLPSI (GPC=0)	GPC	BVC	Org	Weight-8	w(-1,-1,130,70)	7	GID-007	88.69	79.6	5.38	15.49	795.934	AAC Brandon	*AAC Brandon	CWRS	2013	Donor for Org	Yes (all 3 indexes)	Yes	Agriculture and AgriFood Canada
R	RLPSI (GPC restricted)	RLPSI (GPC=0)	GPC	BVC	Org	Weight-8	w(-1,-1,130,70)	122	GID-124	90.27	77.72	5.53	14.78	792.567	AAC Castle	*AAC Castle	CPSR	2018		Yes using RLPSI (GPC=0)	Yes	Agriculture and AgriFood Canada
R	RLPSI (GPC restricted)	RLPSI (GPC=0)	GPC	BVC	Org	Weight-8	w(-1,-1,130,70)	102	GID-104	88.63	82.56	6.02	13.47	788.852	Faller	Faller	CNHR	2018		Yes using RLPSI (GPC=0)		Seed Depot Corp.
R	RLPSI (GPC restricted)	RLPSI (GPC=0)	GPC	BVC	Org	Weight-8	w(-1,-1,130,70)	78	GID-079	86.4	89.16	5.33	15.92	788.001	CDC Imagine	*CDC Imagine	CWRS	2002	Donor for Org	Yes (all 3 indexes)	Yes	University of Saskatchewan
R	RLPSI (GPC restricted)	RLPSI (GPC=0)	GPC	BVC	Org	Weight-8	w(-1,-1,130,70)	119	GID-121	86.38	78.97	5.74	14.13	787.969	CDC Cordon CLPlus	CDC Cordon CLPlus	CNHR	2018		Yes using RLPSI (GPC=0)		University of Saskatchewan
R	RLPSI (GPC restricted)	RLPSI (GPC=0)	GPC	BVC	Org	Weight-8	w(-1,-1,130,70)	114	GID-116	91.62	79.85	6.5	11.72	786.213	AAC Awesome	AAC Awesome	CWSP	2016		Yes using RLPSI (GPC=0)		Agriculture and AgriFood Canada
R	RLPSI (GPC restricted)	RLPSI (GPC=0)	GPC	BVC	Org	Weight-8	w(-1,-1,130,70)	65	GID-065	84.69	95.53	5.5	15.62	783.28	Zealand	*Zealand	CWRS	2016	Donor for Org	Yes (all 3 indexes)	Yes	University of Alberta
R	RLPSI (GPC restricted)	RLPSI (GPC=0)	GPC	BVC	Org	Weight-8	w(-1,-1,130,70)	16	GID-016	88.48	73.71	5.23	15.15	783.017	AAC Penhold	*AAC Penhold	CPSR	2014		Yes using RLPSI (GPC=0)	Yes	Agriculture and AgriFood Canada
R	RLPSI (GPC restricted)	RLPSI (GPC=0)	GPC	BVC	Org	Weight-8	w(-1,-1,130,70)	13	GID-013	88.5	83.02	5.72	14.11	780.951	AAC Foray	AAC Foray	CPSR	2014		Yes using RLPSI (GPC=0)		Agriculture and AgriFood Canada
R	RLPSI (GPC restricted)	RLPSI (GPC=0)	GPC	BVC	Org	Weight-8	w(-1,-1,130,70)	11	GID-011	88.8	78.44	5.35	14.96	780.802	AAC Elie	AAC Elie	CWRS	2013		Yes using RLPSI (GPC=0)		Agriculture and AgriFood Canada
R	RLPSI (GPC restricted)	RLPSI (GPC=0)	GPC	BVC	Org	Weight-8	w(-1,-1,130,70)	183	GID-185	86.92	83.44	5.6	14.42	778.04	Superb	Superb	CWRS	2001		Yes using RLPSI (GPC=0)		Agriculture and AgriFood Canada
R	RLPSI (GPC restricted)	RLPSI (GPC=0)	GPC	BVC	Org	Weight-8	w(-1,-1,130,70)	184	GID-186	93.48	78.68	6.74	10.58	777.594	SWS52	SWS52	CWSWS	1905		Yes using RLPSI (GPC=0)
R	RLPSI (GPC restricted)	RLPSI (GPC=0)	GPC	BVC	Org	Weight-8	w(-1,-1,130,70)	189	GID-191	89.12	82.04	5.71	13.93	777.033	SY985	SY985	CPSR	2011		Yes using RLPSI (GPC=0)		Syngenta Canada Inc.
R	RLPSI (GPC restricted)	RLPSI (GPC=0)	GPC	BVC	Org	Weight-8	w(-1,-1,130,70)	2	GID-002	88.36	89.58	5.17	15.93	775.641	5605HR CL	*5605HR CL	CNHR	2013	Donor for Org	Yes (LPSI and RLPS Yld=0)	Yes	Syngenta Canada Inc.
R	RLPSI (GPC restricted)	RLPSI (GPC=0)	GPC	BVC	Org	Weight-8	w(-1,-1,130,70)	5	GID-005	89.76	84.05	5.92	13.34	775.524	5702PR	5702PR	CPSR	2008		Yes using RLPSI (GPC=0)		Syngenta Canada Inc.
R	RLPSI (GPC restricted)	RLPSI (GPC=0)	GPC	BVC	Org	Weight-9	w(-5,-1,130,70)	62	GID-062	89	82.51	6	14.63	469.44	AAC Goodwin	*AAC Goodwin	CPSR	2017	Donor for Org	Yes (all 3 indexes)	Yes	Agriculture and AgriFood Canada
R	RLPSI (GPC restricted)	RLPSI (GPC=0)	GPC	BVC	Org	Weight-9	w(-5,-1,130,70)	97	GID-099	89.92	91.43	6.17	14.7	468.802	Conquer	*Conquer	CNHR	2010	Donor for Org	Yes (all 3 indexes)	Yes	Agriculture and AgriFood Canada
R	RLPSI (GPC restricted)	RLPSI (GPC=0)	GPC	BVC	Org	Weight-9	w(-5,-1,130,70)	113	GID-115	91.82	83.07	6.41	13.08	459.422	CDC Throttle	CDC Throttle	CWSP	2016		Yes using RLPSI (GPC=0)		University of Saskatchewan
R	RLPSI (GPC restricted)	RLPSI (GPC=0)	GPC	BVC	Org	Weight-9	w(-5,-1,130,70)	21	GID-021	88.16	73.59	5.57	14.79	453.98	AAC Viewfield	*AAC Viewfield	CWRS	2016	Donor for Org	Yes (all 3 indexes)	Yes	Agriculture and AgriFood Canada
R	RLPSI (GPC restricted)	RLPSI (GPC=0)	GPC	BVC	Org	Weight-9	w(-5,-1,130,70)	119	GID-121	86.38	78.97	5.74	14.13	448.97	CDC Cordon CLPlus	CDC Cordon CLPlus	CNHR	2018		Yes using RLPSI (GPC=0)		University of Saskatchewan
R	RLPSI (GPC restricted)	RLPSI (GPC=0)	GPC	BVC	Org	Weight-9	w(-5,-1,130,70)	102	GID-104	88.63	82.56	6.02	13.47	445.462	Faller	Faller	CNHR	2018		Yes using RLPSI (GPC=0)		Seed Depot Corp.
R	RLPSI (GPC restricted)	RLPSI (GPC=0)	GPC	BVC	Org	Weight-9	w(-5,-1,130,70)	7	GID-007	88.69	79.6	5.38	15.49	443.906	AAC Brandon	*AAC Brandon	CWRS	2013	Donor for Org	Yes (all 3 indexes)	Yes	Agriculture and AgriFood Canada
R	RLPSI (GPC restricted)	RLPSI (GPC=0)	GPC	BVC	Org	Weight-9	w(-5,-1,130,70)	65	GID-065	84.69	95.53	5.5	15.62	442.23	Zealand	*Zealand	CWRS	2016	Donor for Org	Yes (all 3 indexes)	Yes	University of Alberta
R	RLPSI (GPC restricted)	RLPSI (GPC=0)	GPC	BVC	Org	Weight-9	w(-5,-1,130,70)	114	GID-116	91.62	79.85	6.5	11.72	441.178	AAC Awesome	AAC Awesome	CWSP	2016		Yes using RLPSI (GPC=0)		Agriculture and AgriFood Canada
R	RLPSI (GPC restricted)	RLPSI (GPC=0)	GPC	BVC	Org	Weight-9	w(-5,-1,130,70)	78	GID-079	86.4	89.16	5.33	15.92	440.728	CDC Imagine	*CDC Imagine	CWRS	2002	Donor for Org	Yes (all 3 indexes)	Yes	University of Saskatchewan
R	RLPSI (GPC restricted)	RLPSI (GPC=0)	GPC	BVC	Org	Weight-9	w(-5,-1,130,70)	122	GID-124	90.27	77.72	5.53	14.78	438.802	AAC Castle	*AAC Castle	CPSR	2018		Yes using RLPSI (GPC=0)	Yes	Agriculture and AgriFood Canada
R	RLPSI (GPC restricted)	RLPSI (GPC=0)	GPC	BVC	Org	Weight-9	w(-5,-1,130,70)	183	GID-185	86.92	83.44	5.6	14.42	435.954	Superb	Superb	CWRS	2001		Yes using RLPSI (GPC=0)		Agriculture and AgriFood Canada
R	RLPSI (GPC restricted)	RLPSI (GPC=0)	GPC	BVC	Org	Weight-9	w(-5,-1,130,70)	13	GID-013	88.5	83.02	5.72	14.11	435.288	AAC Foray	AAC Foray	CPSR	2014		Yes using RLPSI (GPC=0)		Agriculture and AgriFood Canada
R	RLPSI (GPC restricted)	RLPSI (GPC=0)	GPC	BVC	Org	Weight-9	w(-5,-1,130,70)	16	GID-016	88.48	73.71	5.23	15.15	433.55	AAC Penhold	*AAC Penhold	CPSR	2014		Yes using RLPSI (GPC=0)	Yes	Agriculture and AgriFood Canada
R	RLPSI (GPC restricted)	RLPSI (GPC=0)	GPC	BVC	Org	Weight-9	w(-5,-1,130,70)	184	GID-186	93.48	78.68	6.74	10.58	431.782	SWS52	SWS52	CWSWS	1905		Yes using RLPSI (GPC=0)
R	RLPSI (GPC restricted)	RLPSI (GPC=0)	GPC	BVC	Org	Weight-9	w(-5,-1,130,70)	11	GID-011	88.8	78.44	5.35	14.96	430.883	AAC Elie	AAC Elie	CWRS	2013		Yes using RLPSI (GPC=0)		Agriculture and AgriFood Canada
R	RLPSI (GPC restricted)	RLPSI (GPC=0)	GPC	BVC	Org	Weight-9	w(-5,-1,130,70)	189	GID-191	89.12	82.04	5.71	13.93	430.309	SY985	SY985	CPSR	2011		Yes using RLPSI (GPC=0)		Syngenta Canada Inc.
R	RLPSI (GPC restricted)	RLPSI (GPC=0)	GPC	BVC	Org	Weight-9	w(-5,-1,130,70)	137	GID-139	85.25	88.64	5.07	16.18	429.228	Lillian	*Lillian	CNHR	2003	Donor for Org	Yes (LPSI and RLPS Yld=0)	Yes	Secan Association
R	RLPSI (GPC restricted)	RLPSI (GPC=0)	GPC	BVC	Org	Weight-9	w(-5,-1,130,70)	5	GID-005	89.76	84.05	5.92	13.34	429.212	5702PR	5702PR	CPSR	2008		Yes using RLPSI (GPC=0)		Syngenta Canada Inc.
R	RLPSI (GPC restricted)	RLPSI (GPC=0)	GPC	BVC	Org	Weight-10	w(-1,-1,120,70)	97	GID-099	89.92	91.43	6.17	14.7	749.337	Conquer	*Conquer	CNHR	2010	Donor for Org	Yes (all 3 indexes)	Yes	Agriculture and AgriFood Canada
R	RLPSI (GPC restricted)	RLPSI (GPC=0)	GPC	BVC	Org	Weight-10	w(-1,-1,120,70)	62	GID-062	89	82.51	6	14.63	747.109	AAC Goodwin	*AAC Goodwin	CPSR	2017	Donor for Org	Yes (all 3 indexes)	Yes	Agriculture and AgriFood Canada
R	RLPSI (GPC restricted)	RLPSI (GPC=0)	GPC	BVC	Org	Weight-10	w(-1,-1,120,70)	113	GID-115	91.82	83.07	6.41	13.08	739.402	CDC Throttle	CDC Throttle	CWSP	2016		Yes using RLPSI (GPC=0)		University of Saskatchewan
R	RLPSI (GPC restricted)	RLPSI (GPC=0)	GPC	BVC	Org	Weight-10	w(-1,-1,120,70)	21	GID-021	88.16	73.59	5.57	14.79	731.048	AAC Viewfield	*AAC Viewfield	CWRS	2016	Donor for Org	Yes (all 3 indexes)	Yes	Agriculture and AgriFood Canada
R	RLPSI (GPC restricted)	RLPSI (GPC=0)	GPC	BVC	Org	Weight-10	w(-1,-1,120,70)	7	GID-007	88.69	79.6	5.38	15.49	725.973	AAC Brandon	*AAC Brandon	CWRS	2013	Donor for Org	Yes (all 3 indexes)	Yes	Agriculture and AgriFood Canada
R	RLPSI (GPC restricted)	RLPSI (GPC=0)	GPC	BVC	Org	Weight-10	w(-1,-1,120,70)	122	GID-124	90.27	77.72	5.53	14.78	722.788	AAC Castle	*AAC Castle	CPSR	2018		Yes using RLPSI (GPC=0)	Yes	Agriculture and AgriFood Canada
R	RLPSI (GPC restricted)	RLPSI (GPC=0)	GPC	BVC	Org	Weight-10	w(-1,-1,120,70)	102	GID-104	88.63	82.56	6.02	13.47	719.005	Faller	Faller	CNHR	2018		Yes using RLPSI (GPC=0)		Seed Depot Corp.
R	RLPSI (GPC restricted)	RLPSI (GPC=0)	GPC	BVC	Org	Weight-10	w(-1,-1,120,70)	119	GID-121	86.38	78.97	5.74	14.13	718.645	CDC Cordon CLPlus	CDC Cordon CLPlus	CNHR	2018		Yes using RLPSI (GPC=0)		University of Saskatchewan
R	RLPSI (GPC restricted)	RLPSI (GPC=0)	GPC	BVC	Org	Weight-10	w(-1,-1,120,70)	78	GID-079	86.4	89.16	5.33	15.92	718.256	CDC Imagine	*CDC Imagine	CWRS	2002	Donor for Org	Yes (all 3 indexes)	Yes	University of Saskatchewan
R	RLPSI (GPC restricted)	RLPSI (GPC=0)	GPC	BVC	Org	Weight-10	w(-1,-1,120,70)	114	GID-116	91.62	79.85	6.5	11.72	716.323	AAC Awesome	AAC Awesome	CWSP	2016		Yes using RLPSI (GPC=0)		Agriculture and AgriFood Canada
R	RLPSI (GPC restricted)	RLPSI (GPC=0)	GPC	BVC	Org	Weight-10	w(-1,-1,120,70)	16	GID-016	88.48	73.71	5.23	15.15	714.385	AAC Penhold	*AAC Penhold	CPSR	2014		Yes using RLPSI (GPC=0)	Yes	Agriculture and AgriFood Canada
R	RLPSI (GPC restricted)	RLPSI (GPC=0)	GPC	BVC	Org	Weight-10	w(-1,-1,120,70)	65	GID-065	84.69	95.53	5.5	15.62	713.576	Zealand	*Zealand	CWRS	2016	Donor for Org	Yes (all 3 indexes)	Yes	University of Alberta
R	RLPSI (GPC restricted)	RLPSI (GPC=0)	GPC	BVC	Org	Weight-10	w(-1,-1,120,70)	11	GID-011	88.8	78.44	5.35	14.96	711.999	AAC Elie	AAC Elie	CWRS	2013		Yes using RLPSI (GPC=0)		Agriculture and AgriFood Canada
R	RLPSI (GPC restricted)	RLPSI (GPC=0)	GPC	BVC	Org	Weight-10	w(-1,-1,120,70)	13	GID-013	88.5	83.02	5.72	14.11	711.766	AAC Foray	AAC Foray	CPSR	2014		Yes using RLPSI (GPC=0)		Agriculture and AgriFood Canada
R	RLPSI (GPC restricted)	RLPSI (GPC=0)	GPC	BVC	Org	Weight-10	w(-1,-1,120,70)	183	GID-185	86.92	83.44	5.6	14.42	709.196	Superb	Superb	CWRS	2001		Yes using RLPSI (GPC=0)		Agriculture and AgriFood Canada
R	RLPSI (GPC restricted)	RLPSI (GPC=0)	GPC	BVC	Org	Weight-10	w(-1,-1,120,70)	184	GID-186	93.48	78.68	6.74	10.58	708.172	SWS52	SWS52	CWSWS	1905		Yes using RLPSI (GPC=0)
R	RLPSI (GPC restricted)	RLPSI (GPC=0)	GPC	BVC	Org	Weight-10	w(-1,-1,120,70)	189	GID-191	89.12	82.04	5.71	13.93	708.147	SY985	SY985	CPSR	2011		Yes using RLPSI (GPC=0)		Syngenta Canada Inc.
R	RLPSI (GPC restricted)	RLPSI (GPC=0)	GPC	BVC	Org	Weight-10	w(-1,-1,120,70)	2	GID-002	88.36	89.58	5.17	15.93	706.686	5605HR CL	*5605HR CL	CNHR	2013	Donor for Org	Yes (LPSI and RLPS Yld=0)	Yes	Syngenta Canada Inc.
R	RLPSI (GPC restricted)	RLPSI (GPC=0)	GPC	BVC	Org	Weight-10	w(-1,-1,120,70)	5	GID-005	89.76	84.05	5.92	13.34	706.512	5702PR	5702PR	CPSR	2008		Yes using RLPSI (GPC=0)		Syngenta Canada Inc.
